# Supplementary material
Source: Research Square preprint supplement (doi:10.21203/rs.3.rs-9262139/v1)

# Fig 1H

(SCC15)

Lamin B1

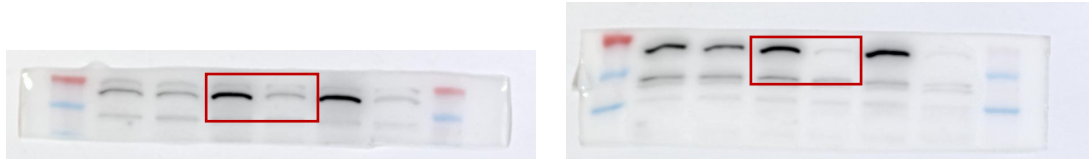

p21

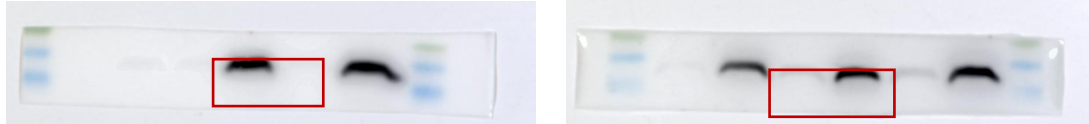

p16

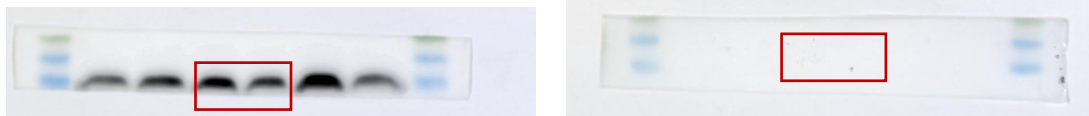

$\beta$ -tubulin

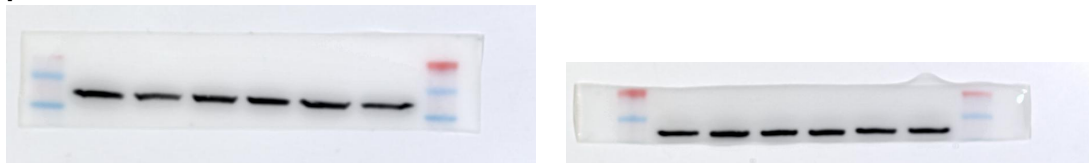

# Fig 1I (SCC15)

Chk2

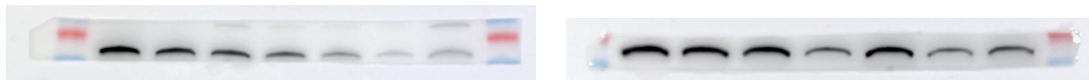

p-Chk2

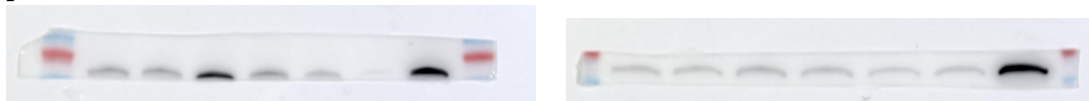

Chk1

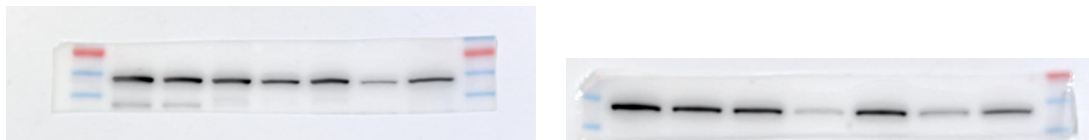

p-Chk1

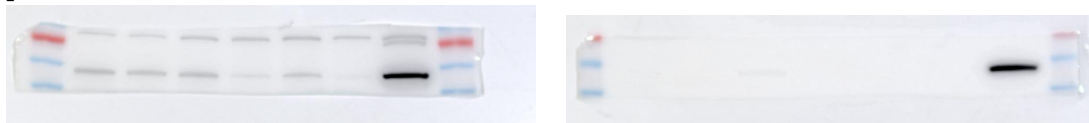

$\gamma$ -H2A.X

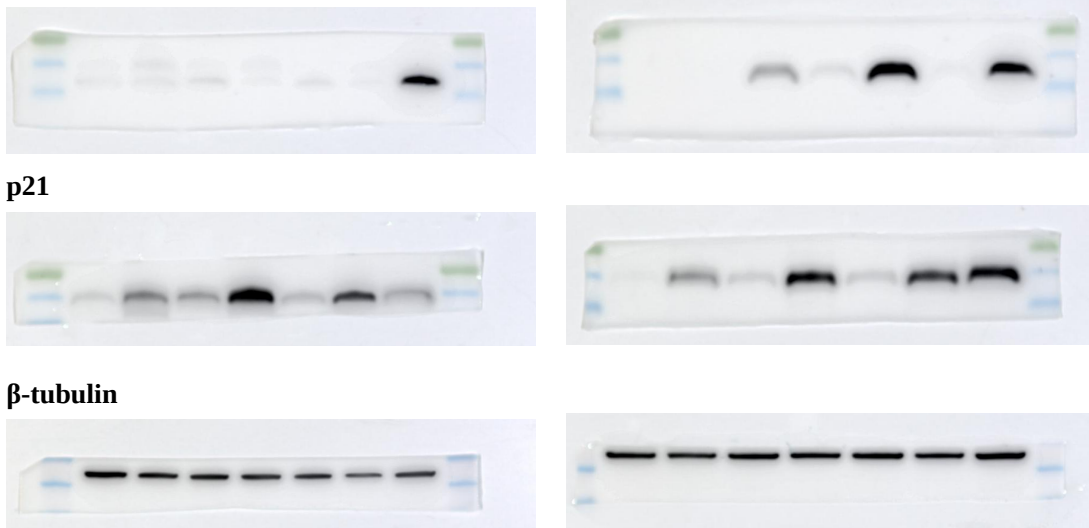

Fig 2A

(left: SCC15, right: SCC25)

MYC

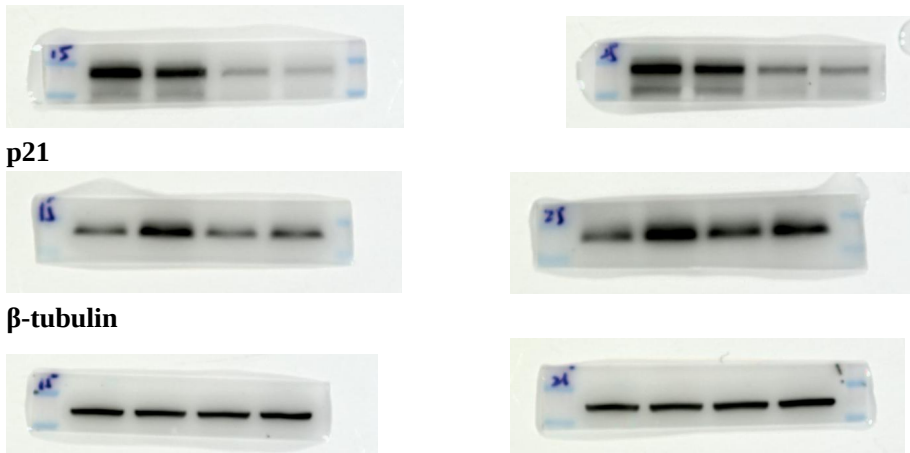

Fig 2B

(left: SCC15, right: SCC25)

FoxO1

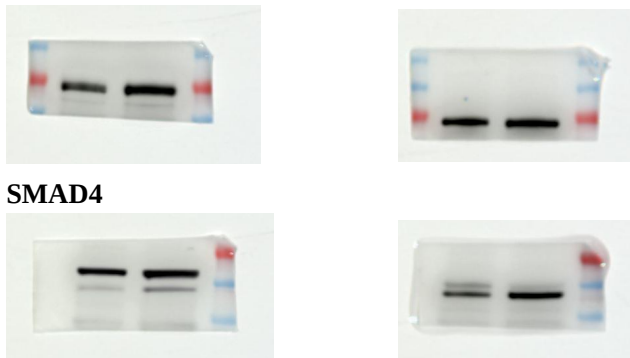

TGF- $\beta$ 1

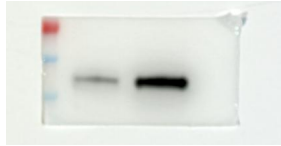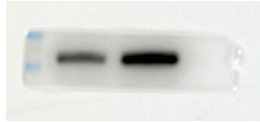

p21

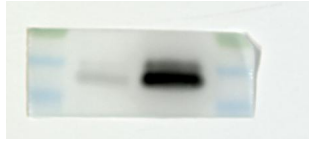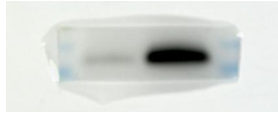

$\beta$ -tubulin

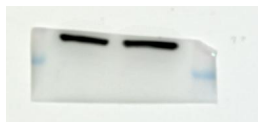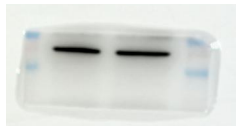

Fig 2D

(left: SCC15, right: SCC25)

SMAD3

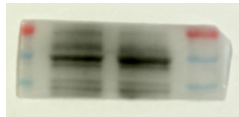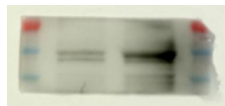

p-SMAD3

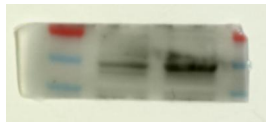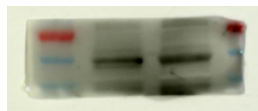

p21

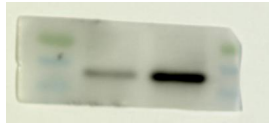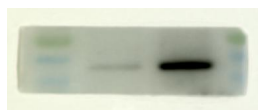

Ku70

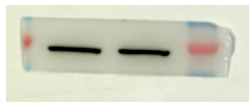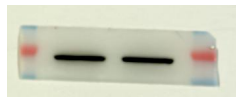

Fig 2G

(left: SCC15, right: SCC25)

TGF- $\beta$ 1

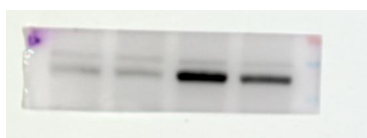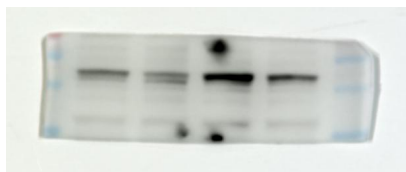

p21

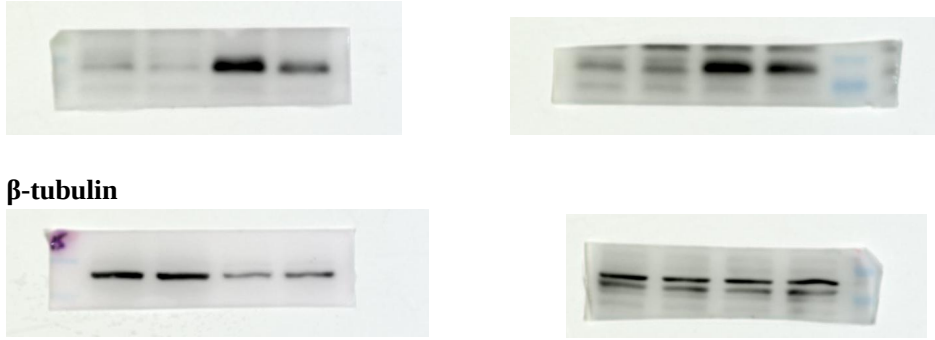

$\beta$ -tubulin

## Fig 2H

(left: SCC15, right: SCC25)

BRD4

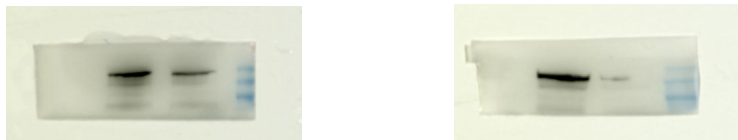

TGF- $\beta$ 1

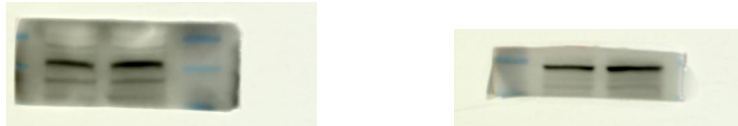

p21

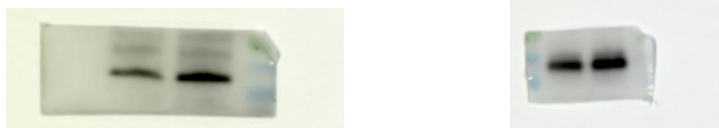

$\beta$ -tubulin

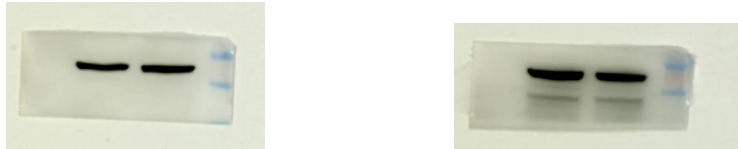

## Fig 2I

(left: SCC15, right: SCC25)

BRD4

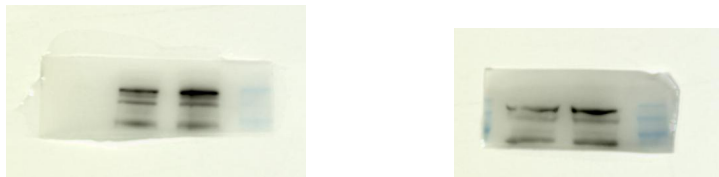

TGF- $\beta$ 1

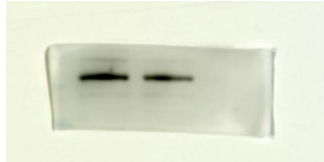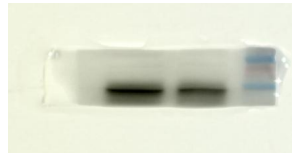

p21

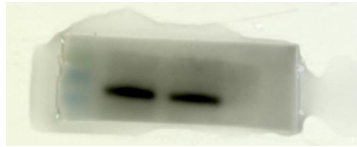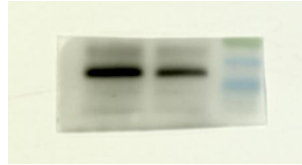

$\beta$ -tubulin

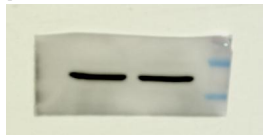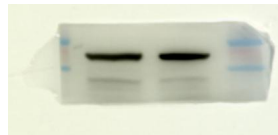

Fig 3F

(left: SCC15, right: SCC25)

NF- $\kappa$ B p65

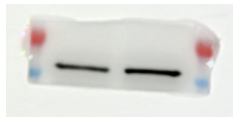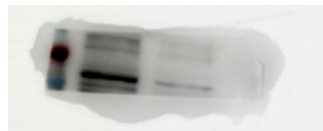

Phospho-NF- $\kappa$ B p65

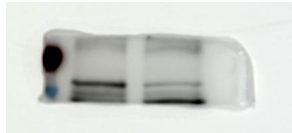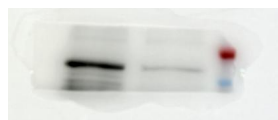

NF- $\kappa$ B p105/p50

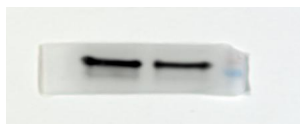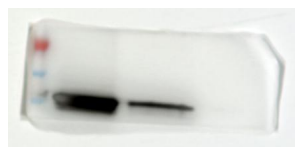

Ku70

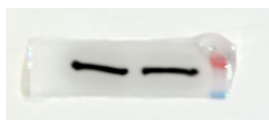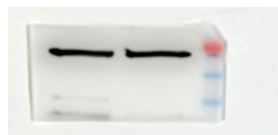

Fig 3G

(left: SCC15, right: SCC25)

C/EBP $\beta$

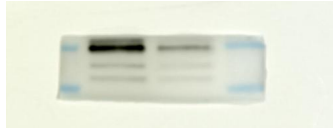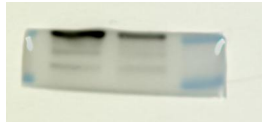

**p21**

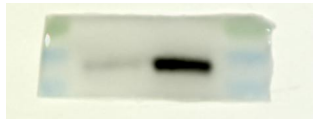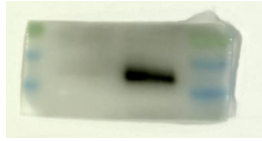

**Ku70**

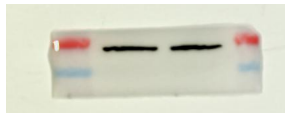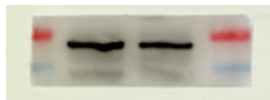

**Fig 3H**

(left: SCC15, right: SCC25)

**IL-1α**

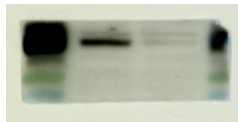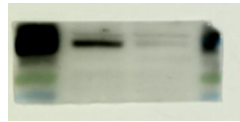

**IL-6**

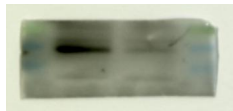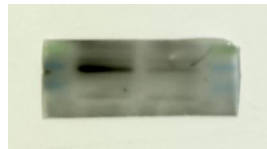

**p21**

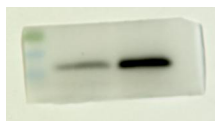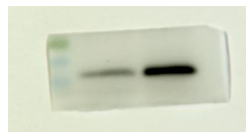

**β-tubulin**

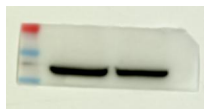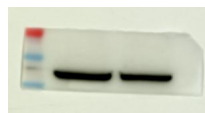

**Fig 4B**

(left: SCC15, right: SCC25)

**Lamin B1**

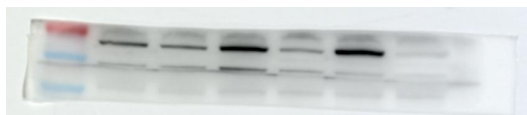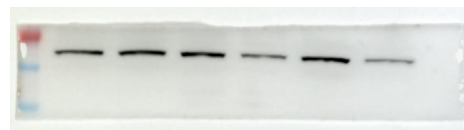

**LC3B I II**

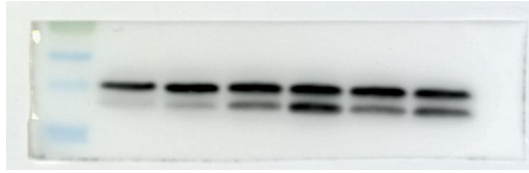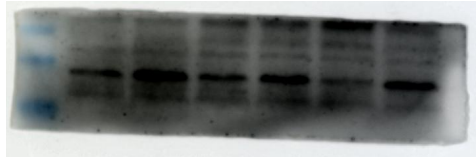

p21

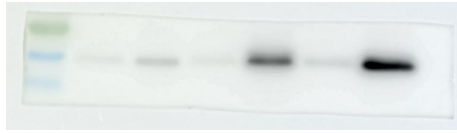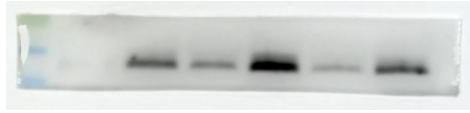

$\beta$ -tubulin

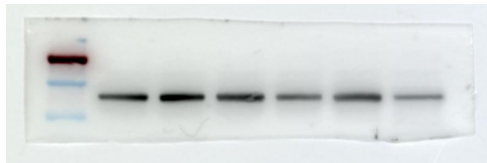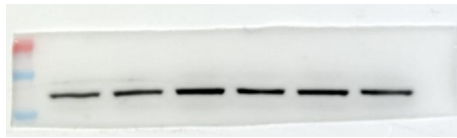

Fig 4C

(left: SCC15, right: SCC25)

GAA

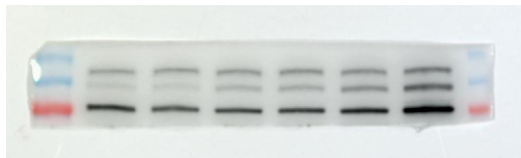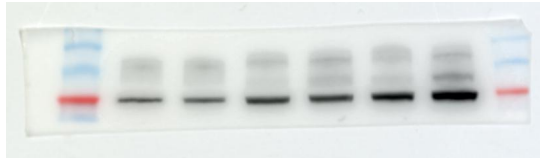

LAMP2

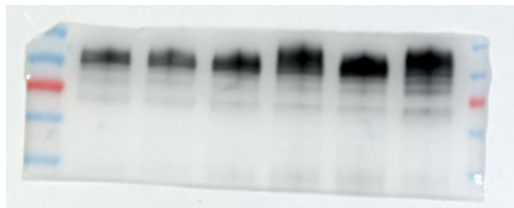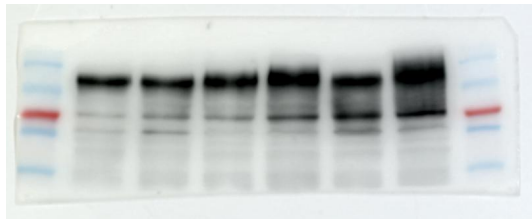

ASM

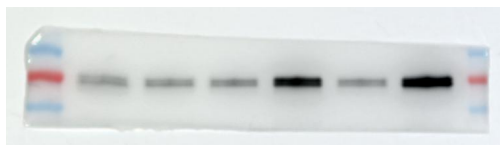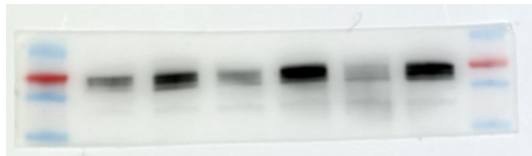

p21

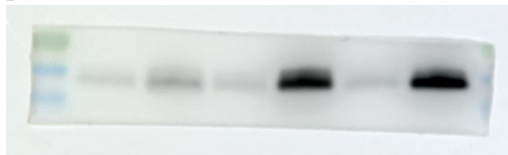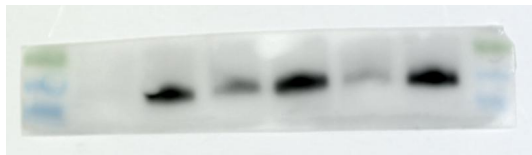

$\beta$ -tubulin

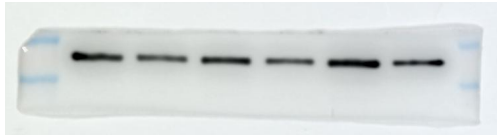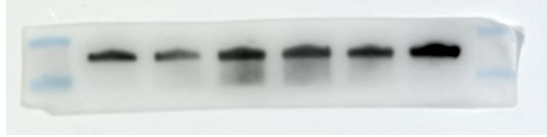

Fig 4E

(left: SCC15, right: SCC25)

BRD4

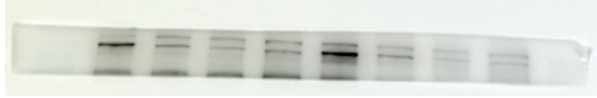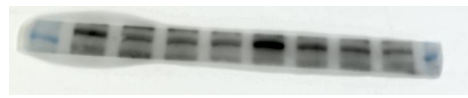

LC3B

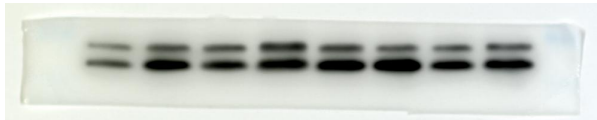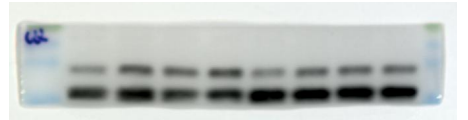

$\beta$ -tubulin

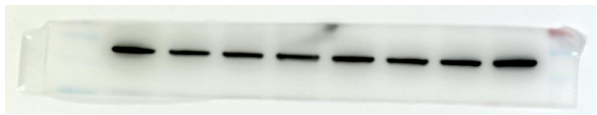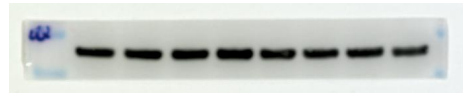

Fig 4F

(left: SCC15, right: SCC25)

LAMP2

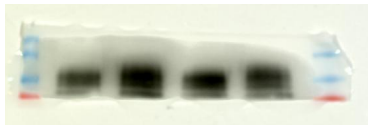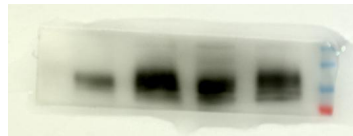

ASM

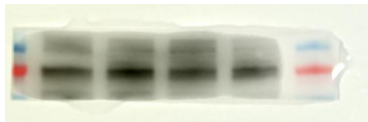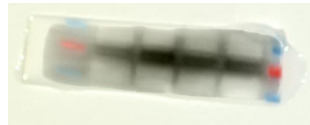

TGF- $\beta$ 1

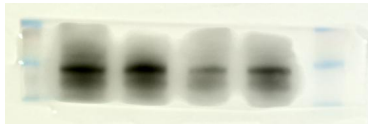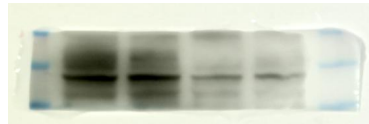

LC3B

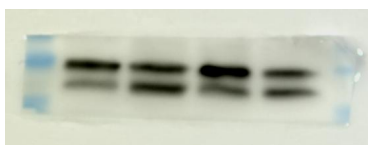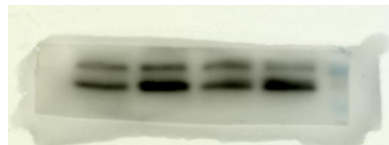

p21

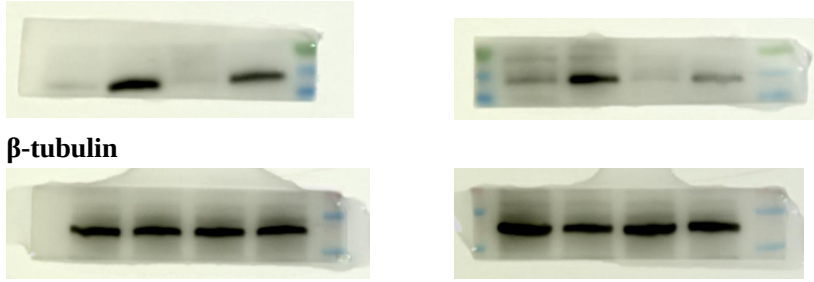

**$\beta$ -tubulin**

**Fig 5A**

(left: SCC15, right: SCC25)

**G9a**

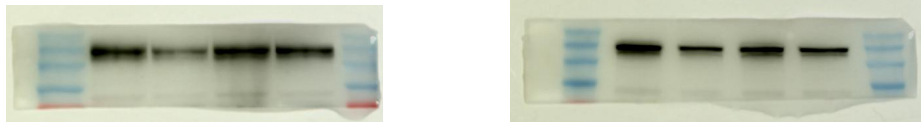

**MYC**

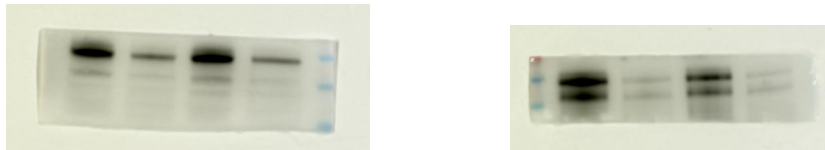

**TGF- $\beta$ 1**

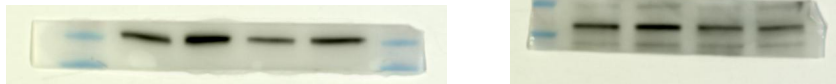

**LC3B**

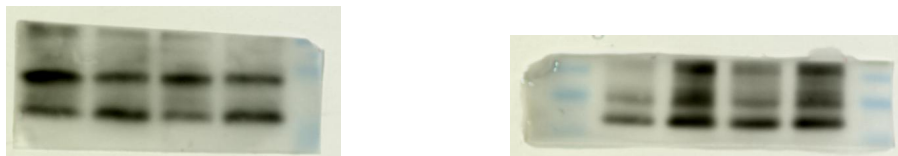

**p21**

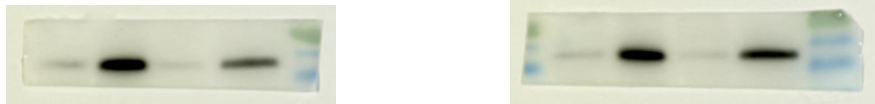

**$\beta$ -tubulin**

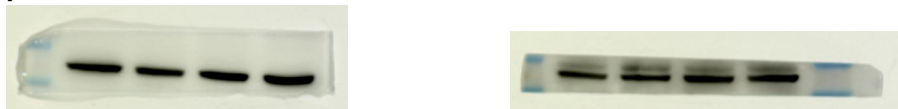

**Fig 5B**

(left: SCC15, right: SCC25)

**BRD4**

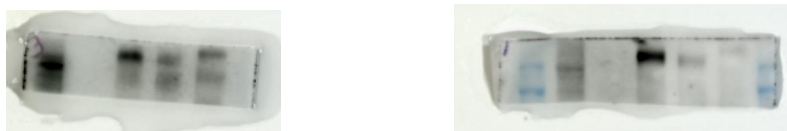

G9a

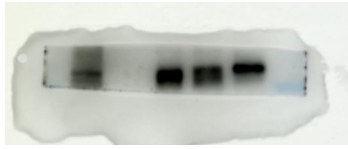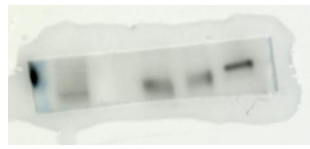

MYC

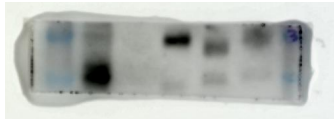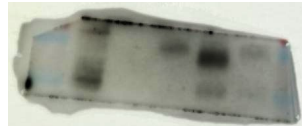

Fig 5C

(left: SCC15, right: SCC25)

G9a

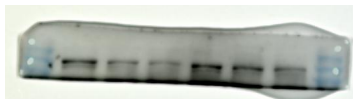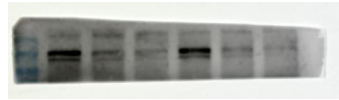

LC3B

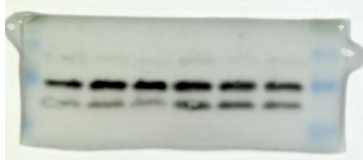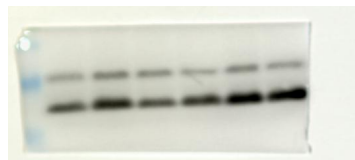

$\beta$ -tubulin

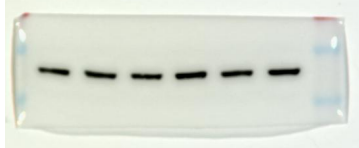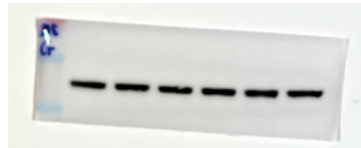

Fig 5D

(left: SCC15, right: SCC25)

MYC

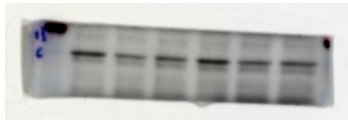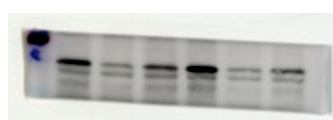

LC3B

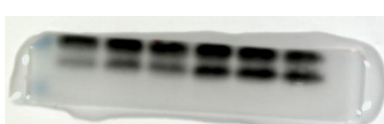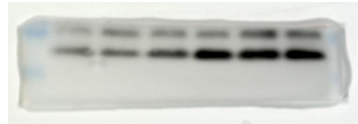

$\beta$ -tubulin

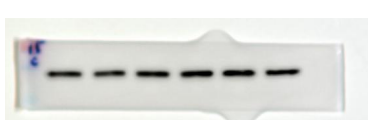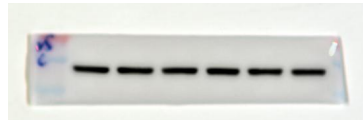

Fig 5E

(left: SCC15, right: SCC25)

MYC

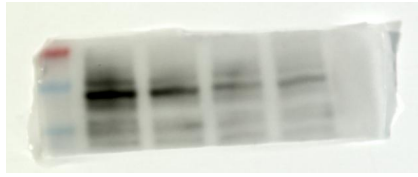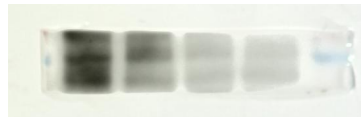

G9a

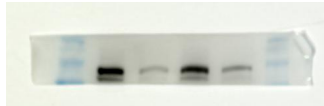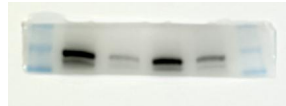

LC3B

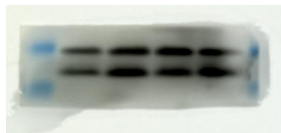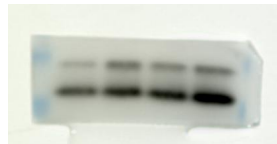

$\beta$ -tubulin

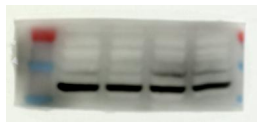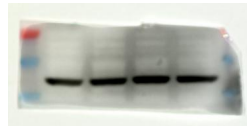

Fig 7G

(left: SCC15, right: SCC25)

p-IRF3

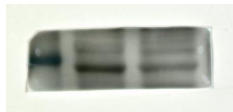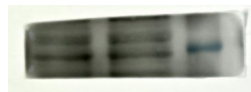

p21

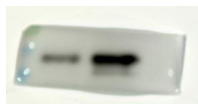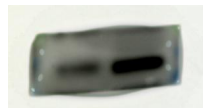

Ku70

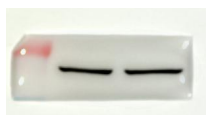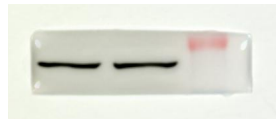

Fig S1B

(left: SCC15, right: SCC25)

Cleaved PARP-S

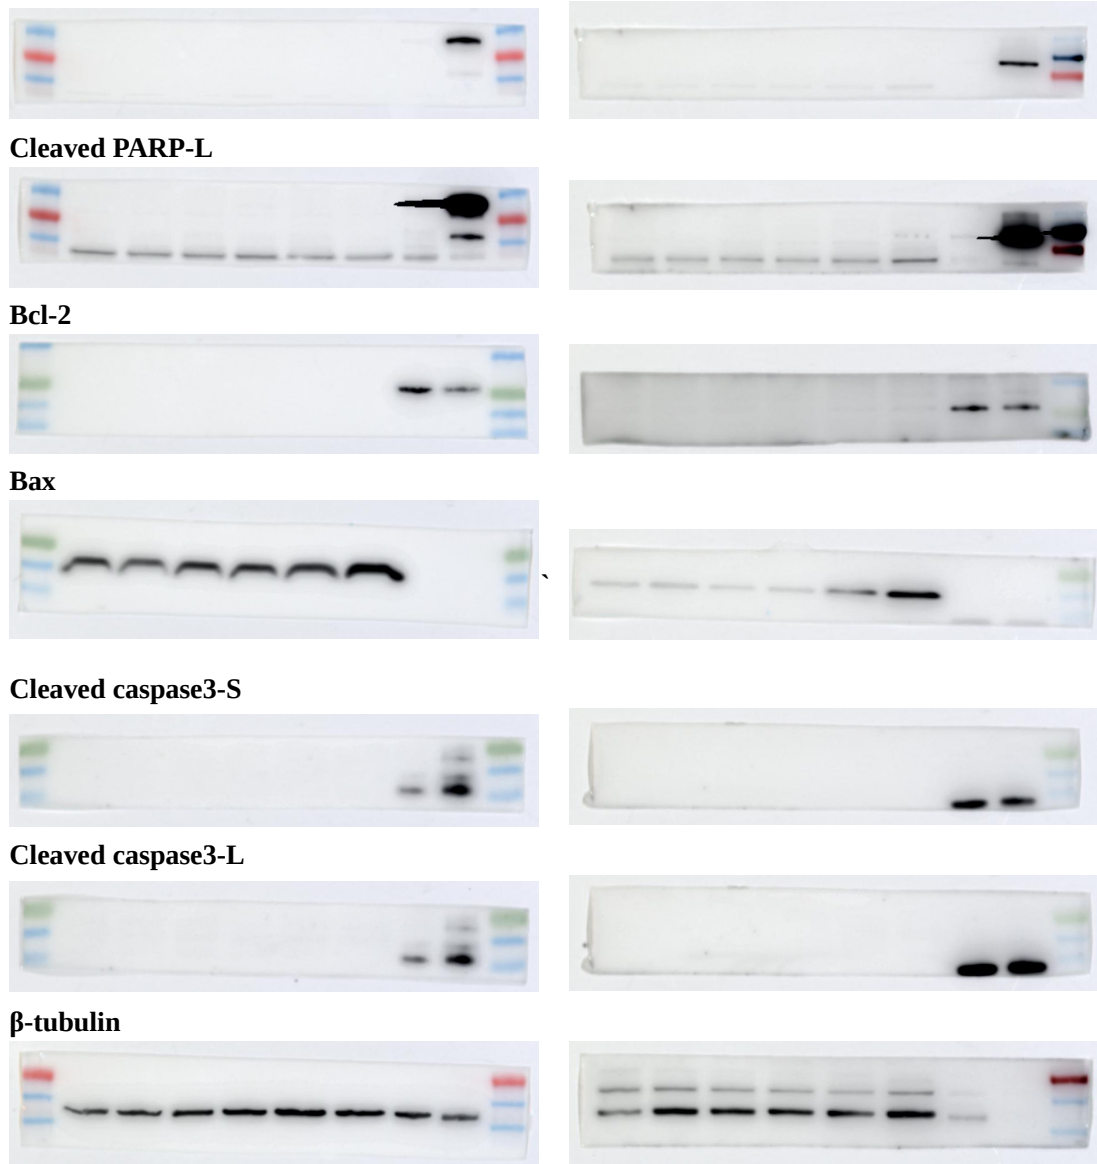

**Fig S1D**

(left: SCC15, right: SCC25)

**CCNA2**

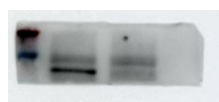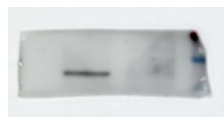

**CCNE1**

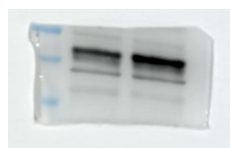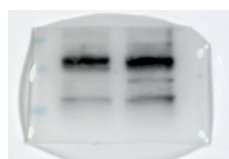

**p21**

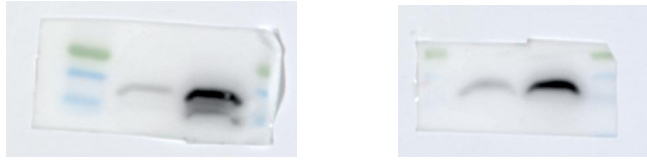

**β-tubulin**

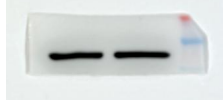

**CDK2**

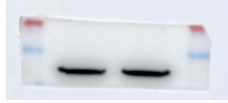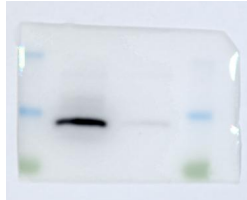

**CDK4**

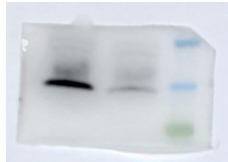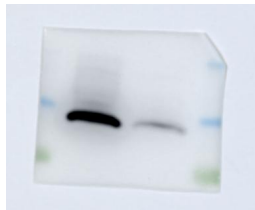

**CDK6**

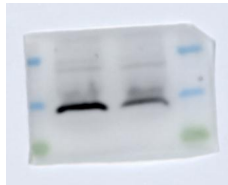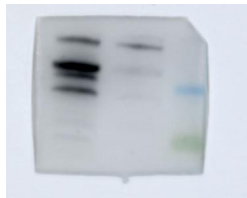

**β-tubulin**

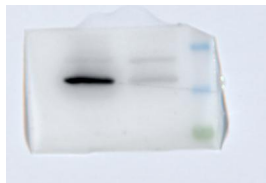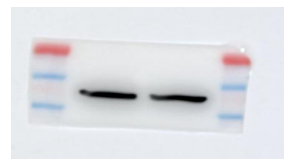

**p53**

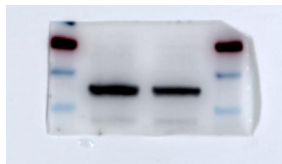

**Fig S1G**

(left: SCC15, right: SCC25)

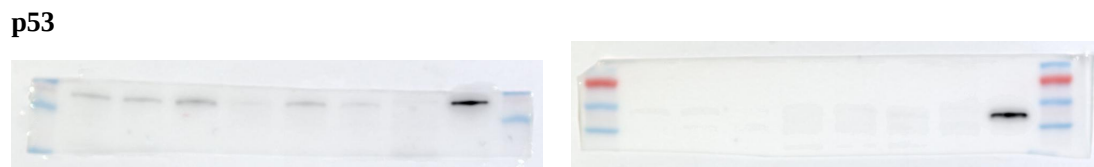

**p-p53**

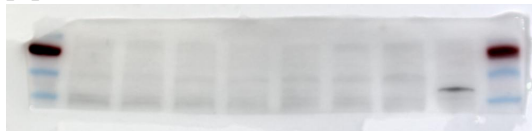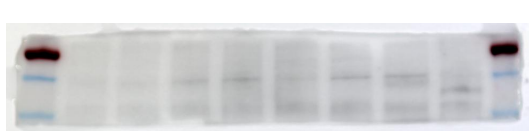

**$\beta$ -tubulin**

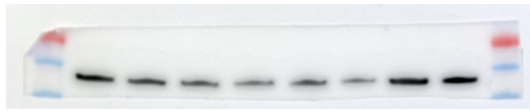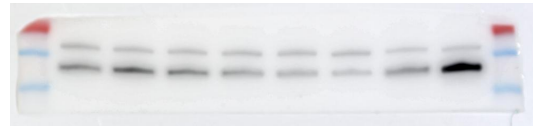

**Fig S1H**

**(left: SCC15, right: SCC25)**

**BRD2**

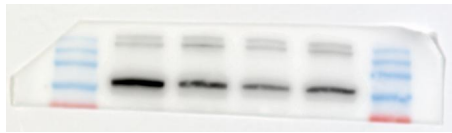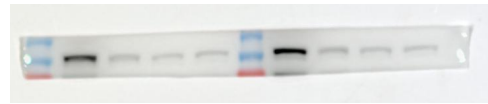

**p21**

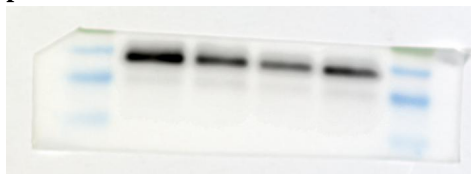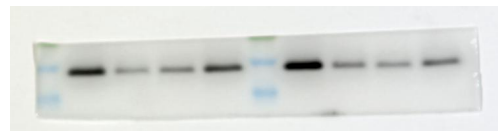

**$\beta$ -tubulin**

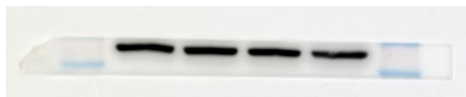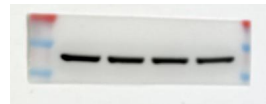

**BRD3**

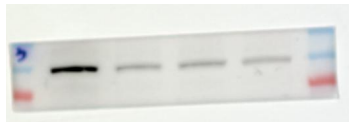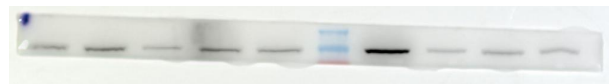

**p21**

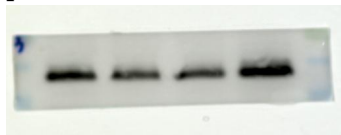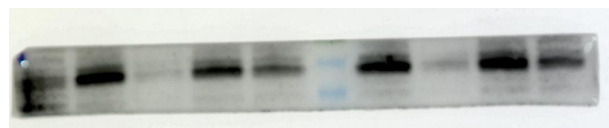

**$\beta$ -tubulin**

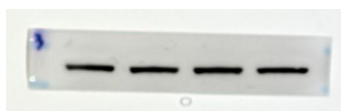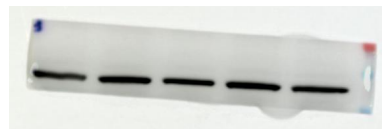

**BRD4**

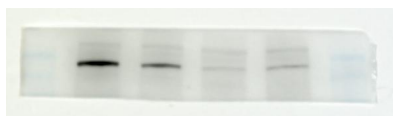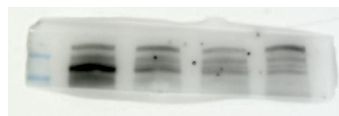

**p21**

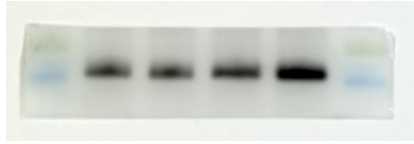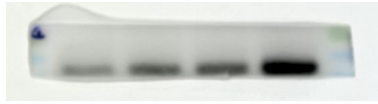

**β-tubulin**

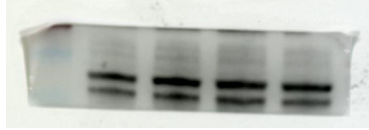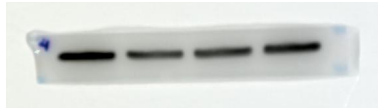

## Fig S3C

(left: SCC15, right: SCC25)

**p62**

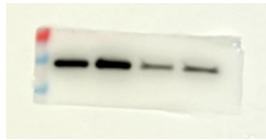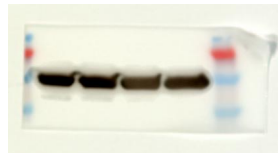

**LC2B**

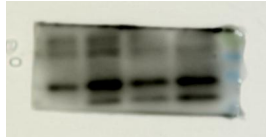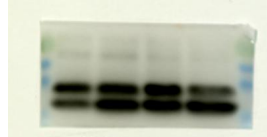

**p21**

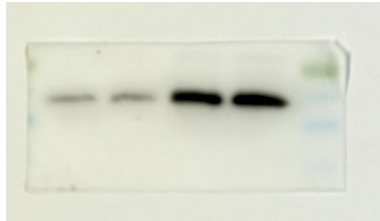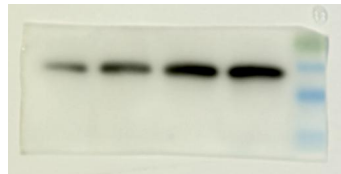

**β-tubulin**

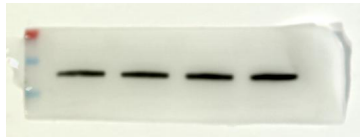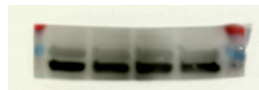

## Fig S3D

(left: SCC15, right: SCC25)

**BRD4**

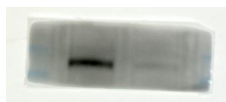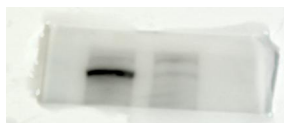

**LAMP2**

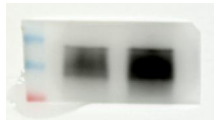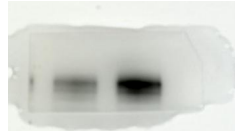

ASM

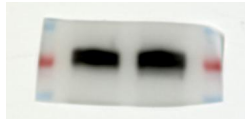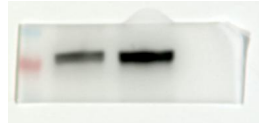

LC2B

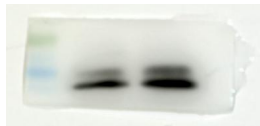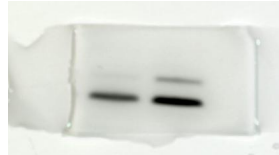

$\beta$ -tubulin

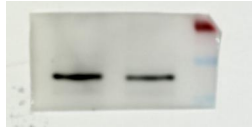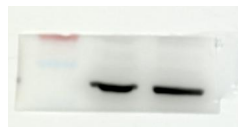

Fig S3E

(left: SCC15, right: SCC25)

ULK1

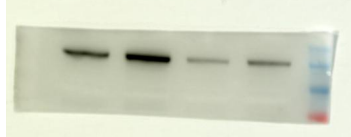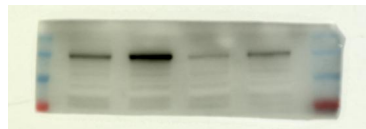

LC3B

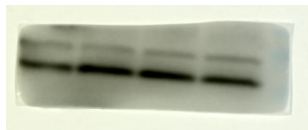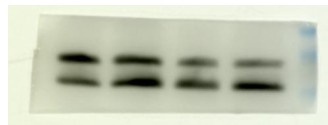

p21

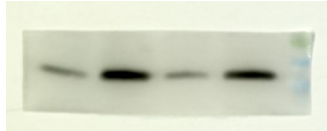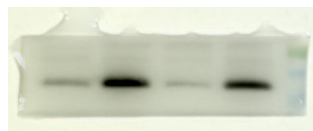

$\beta$ -tubulin

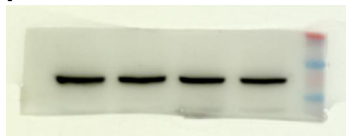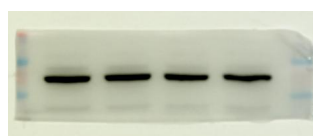

Fig S4A

(left: SCC15, right: SCC25)

**ATG5**

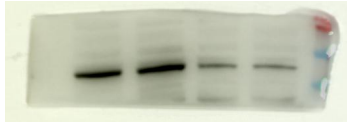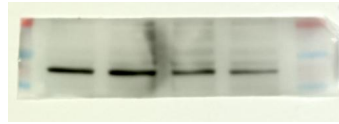

**LC3B**

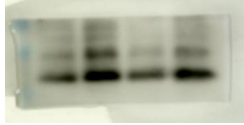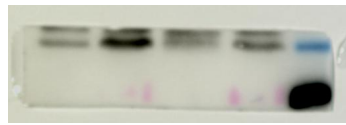

**p21**

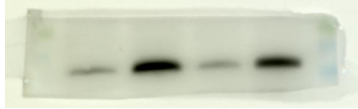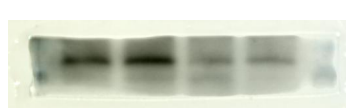

**$\beta$ -tubulin**

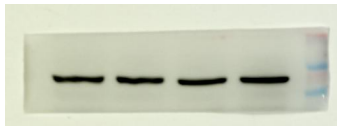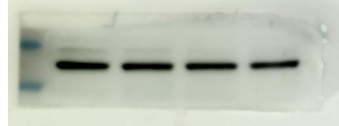

**Fig S4C**

(left: SCC15, right: SCC25)

**BRD4**

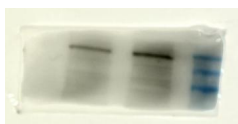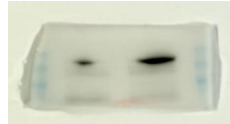

**G9a**

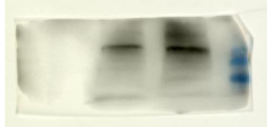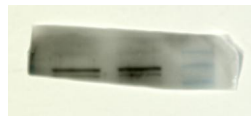

**MYC**

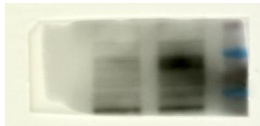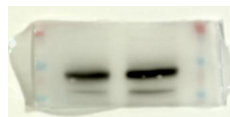

**$\beta$ -tubulin**

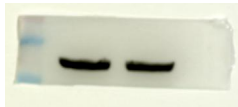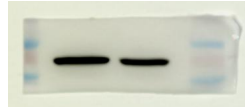

**Fig S4D**

(left: SCC15, right: SCC25)

**BRD4**

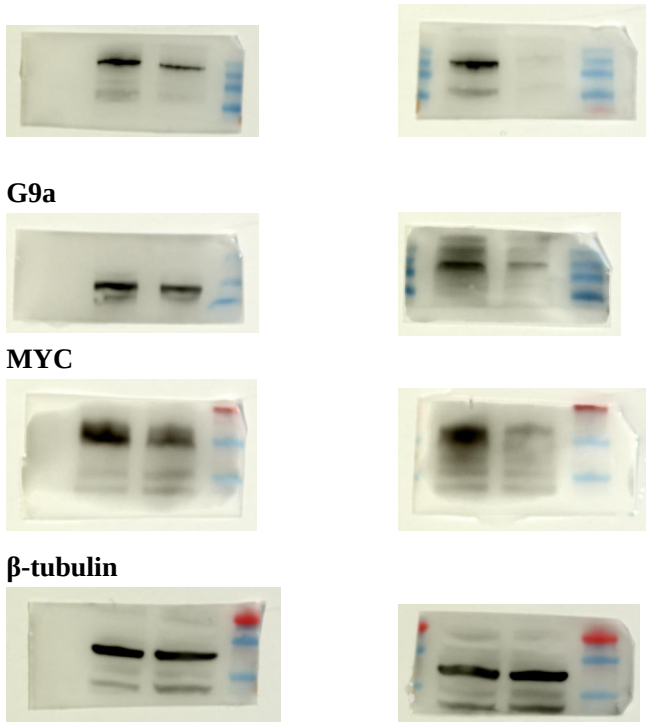

Fig S6B

BRCA1

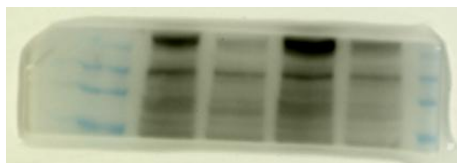

SMAD4

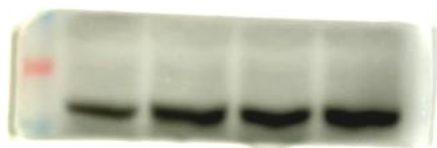

$\beta$ -tubulin

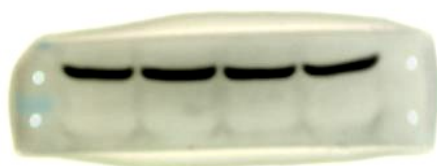

Supplement: Supplementary file 3 [file 922ba58fa61340585d9ee4d9.pdf]
