# Supplementary material
Source: Research Square preprint supplement (doi:10.21203/rs.3.rs-9262139/v1)
Supplement: Supplementary file 1 [file 4b8312de537bd73a3a0151b6.docx]

**The file includes:**

**Figures S1 to 6**


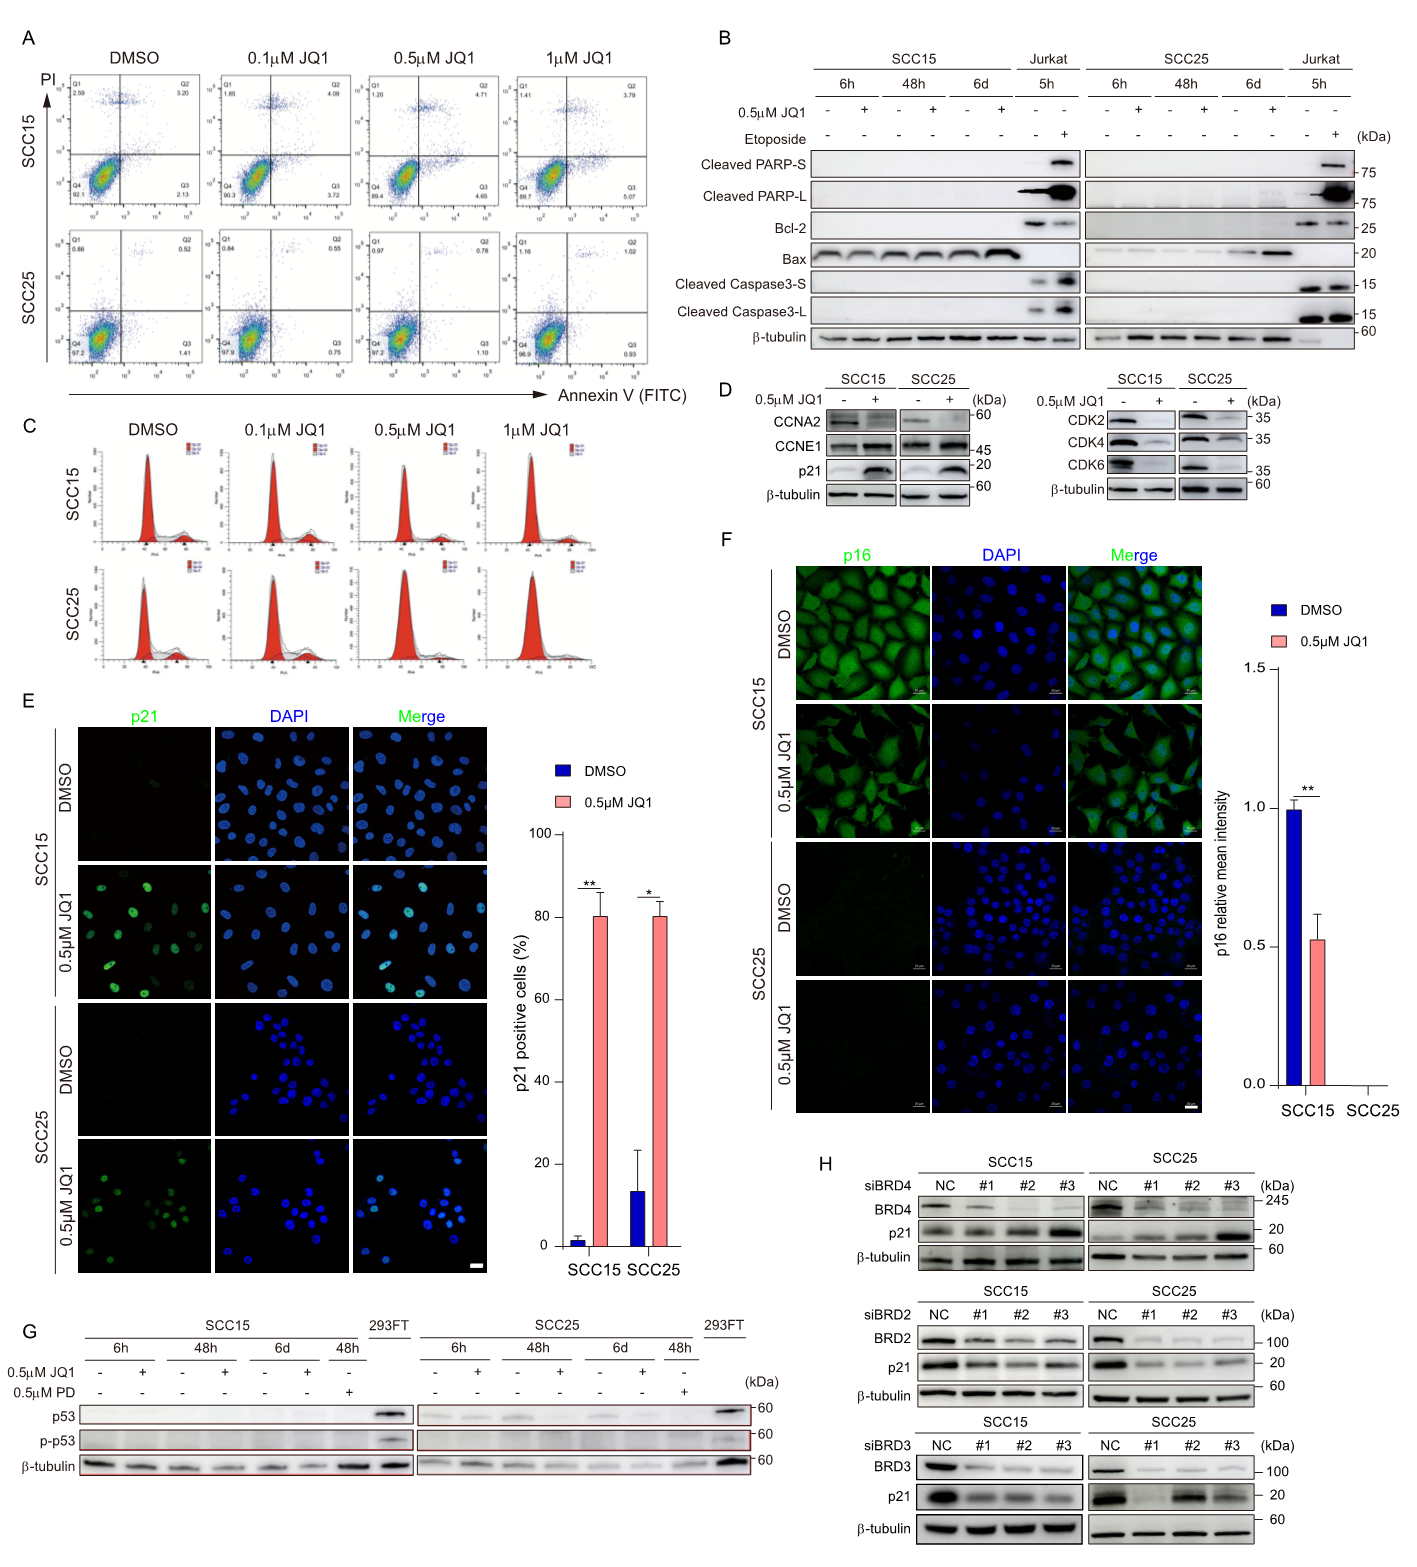


**Figures S1: JQ1-induced cellular senescence is accompanied by p21 upregulation.**

**A)** Representative flow-cytometry evaluation of cell death in SCC15 and SCC25 cells after treatment with increasing doses of JQ1 (n = 3). **B)** Western blotting of two cell lines after treatment with JQ1 for the indicated time periods. Jurkat cells were treated with 25 μM etoposide as positive control. S, short exposure; L, long exposure. **C)** Flow-cytometry of PI incorporation to determine 2N (G0/G1) and 4N (G2/M) DNA content in the two cell lines after treatment with the indicated concentrations of JQ1 (n = 3). Representative experimental results are shown. **D)** Western blotting analysis of the two cell lines after treatment with JQ1. **E, F)** Representative immunofluorescence images of p21 and p16 (left) and the levels (right) in the two cell lines after JQ1 treatment (n = 3, paired two-tailed *t*-test). Scale bar = 20 μm. Percentages of p21 positive cells were scored in > 100 cells from randomly selected fields, and the p16 relative mean intensity was calculated from 3 randomly selected fields, by Image J. **G)** Western blotting of p53 and phosphorylated p53 (p-p53) in SCC15 and SCC25 cells treated with 0.5 μM JQ1 for the indicated time periods (6 h, 48 h and 6 d). 293FT cells treated with 0.5 μM prexasertib dihydrochloride (PD) for 48 h were included as control. **H)** Western blotting of BRD2, BRD3 or BRD4 and p21 in SCC15 and SCC25 cells transfected with negative control siRNA (NC) or three independent siRNAs (#1–#3) targeting BRD2, BRD3 or BRD4.





**Figure S2 BRD4 inhibition is correlated with senescence-associated transcriptome profiles without triggering an inflammatory response.**

**A)** Scatter plot showing the correlation of gene-expression changes between SCC15 and SCC25 cells treated with 0.5 μM JQ1 for 48 h (RNA-seq). **B)** Heatmap of scaled FPKM values for selected inflammatory/SASP-related genes and regulators in SCC15 and SCC25 cells treated with DMSO or 0.5 μM JQ1. Green arrowheads indicate representative regulators (e.g., NF-κB/C/EBPβ- and senescence-related factors), and red arrowheads indicate key inflammatory SASP factors (e.g., TGFB1, CXCL1/2, IL1A/IL6/IL1B)**C**) Representative images of SA-β-gal staining assays (left) and quantification (right) of SA-β-gal–positive cells in MKN-45 cells treated with 5 μM JQ1 and MDA-MB-231 cells treated with 3 μM JQ1 compared with DMSO control. Scale bar = 100 μm. **D)** RT–qPCR analysis of IL-1α, IL-6 and CXCL8 mRNA levels in gastric cancer cell line (MKN-45; 5 μM JQ1) and breast cancer cell line (MDA-MB-231; 3 μM JQ1). (n = 3, mean ± s.d., two-tailed unpaired Student’s t-test.


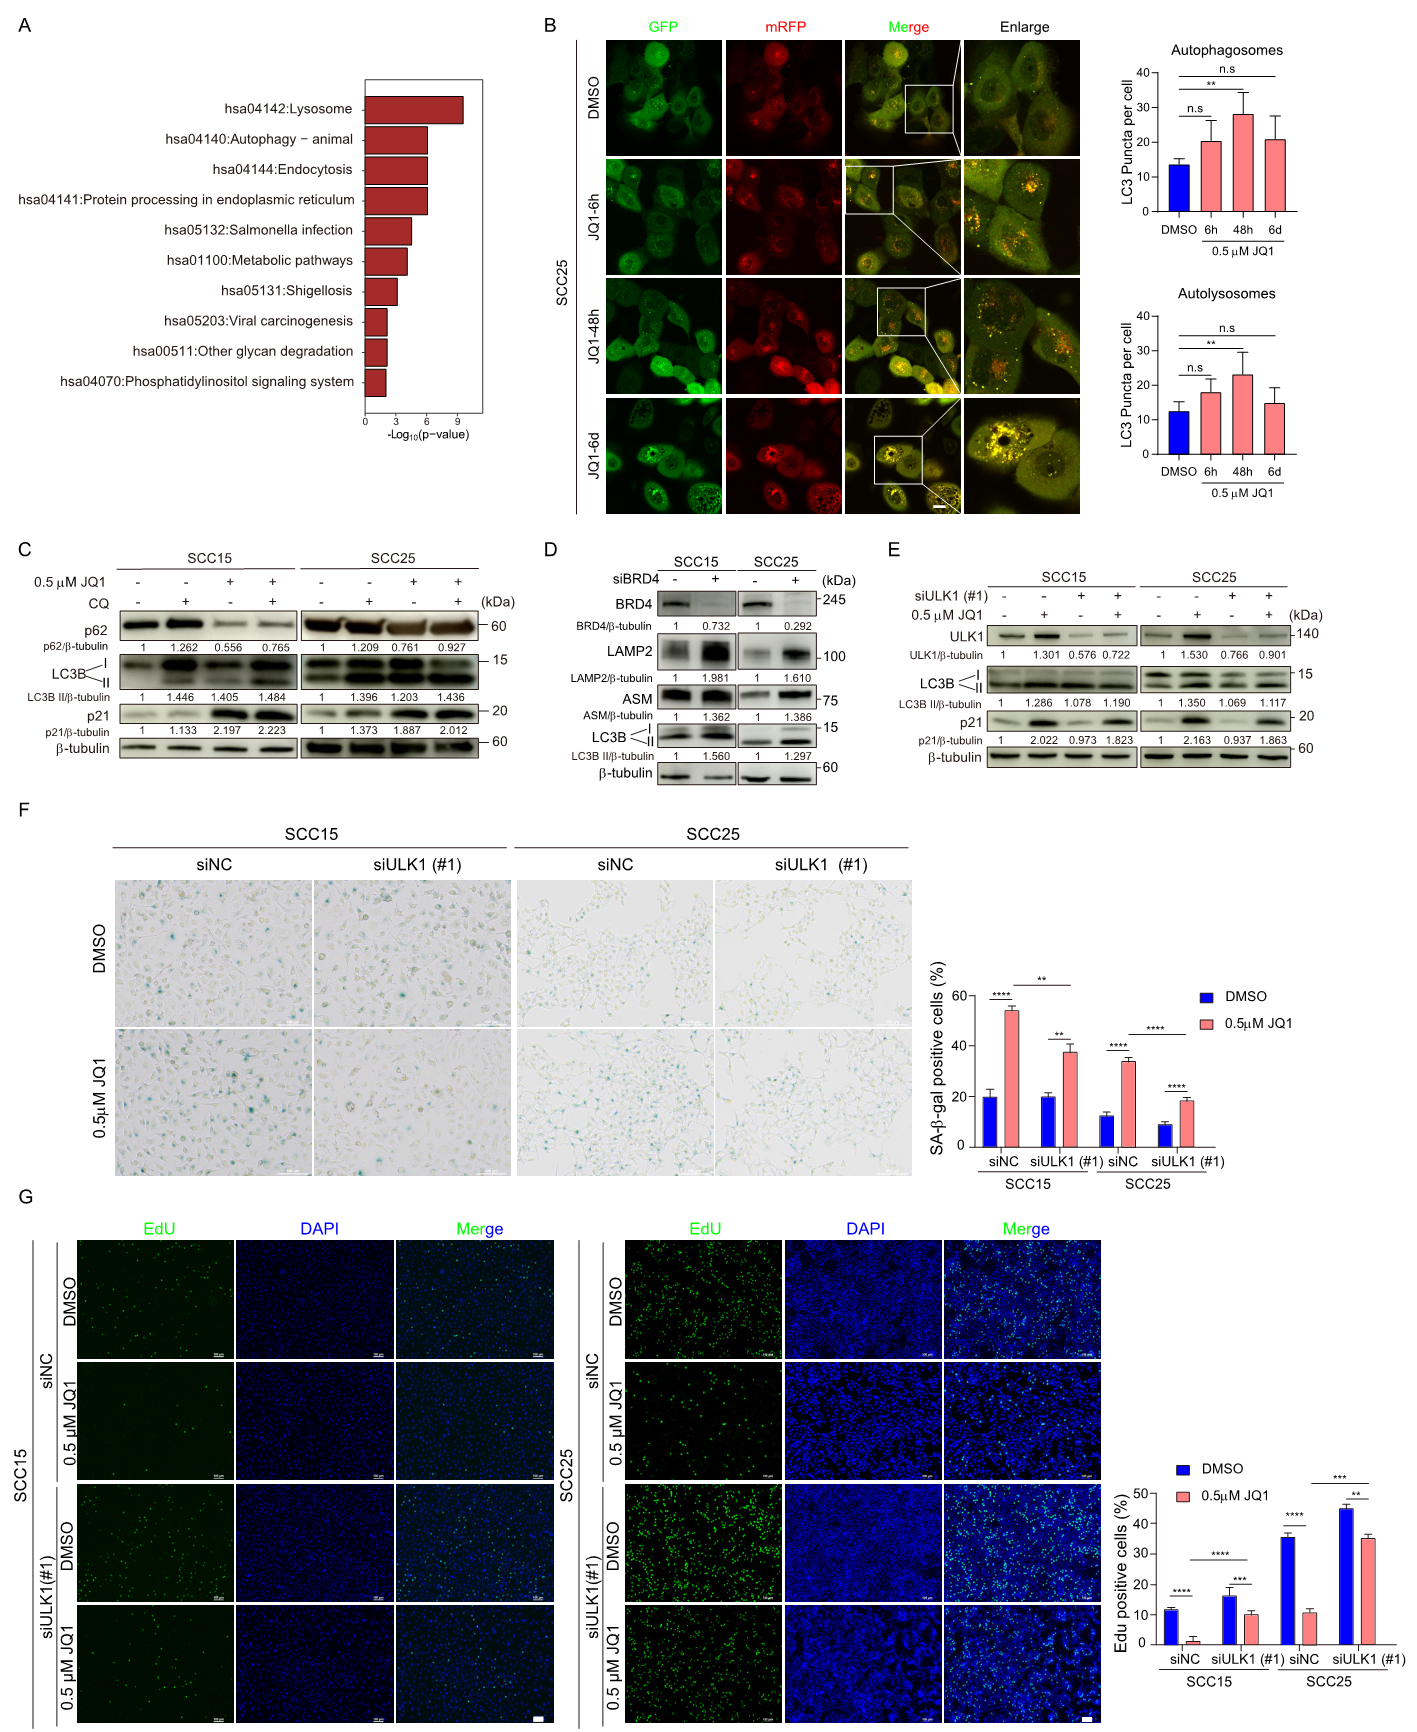


Figure S3. **A)** Top 10 enriched KEGG pathway terms of the commonly upregulated DEGs (described in Fig. 3B) in JQ1-induced senescent SCC15 and SCC25 cells. **B)** Representative images (left) and quantification (right) of the mRFP-GFP-LC3 reporter assay in SCC25 cells treated with 0.5 μM JQ1 for the indicated time periods (6 h, 48 h, 6 d) (DMSO as control). Autophagosomes and autolysosomes were quantified as LC3 puncta per cell (n = 3; one-way ANOVA with LSD post hoc multiple comparison test). **C)** Western blotting of p62/SQSTM1 and LC3B (with p21 as indicated) in SCC15 and SCC25 cells treated with 0.5 μM JQ1; chloroquine (CQ, 10 μM) was used as a lysosomal inhibitor (4 h, as indicated). **D)** Western blotting analysis of BRD4, LAMP2, ASM (SMPD1) and LC3B in SCC15 and SCC25 cells transfected with siBRD4 or siNC control. **E)** Western blotting of ULK1, LC3B and p21 in SCC15 and SCC25 cells transfected with siULK1 (#1) (or control) and treated with 0.5 μM JQ1 as indicated. **F)** Representative images of SA-β-gal staining (left) and quantification of SA-β-gal–positive cells (%) (right) in SCC15 and SCC25 cells transfected with siULK1 (#1) (or siNC) after treatment with DMSO or 0.5 μM JQ1 (n = 3; statistical test as stated in the manuscript, consistent with multi-group comparisons) **G)** Representative images of EdU staining in the two cell lines transfected with siULK1 after treatment with JQ1 for 48 h (left) and the levels (right) of SCC15 and SCC25 (n = 3, unpaired two-tailed t test). Scale bar = 100 μm.The percentages of positive cells were scored in > 100 cells from randomly selected fields (F, G).


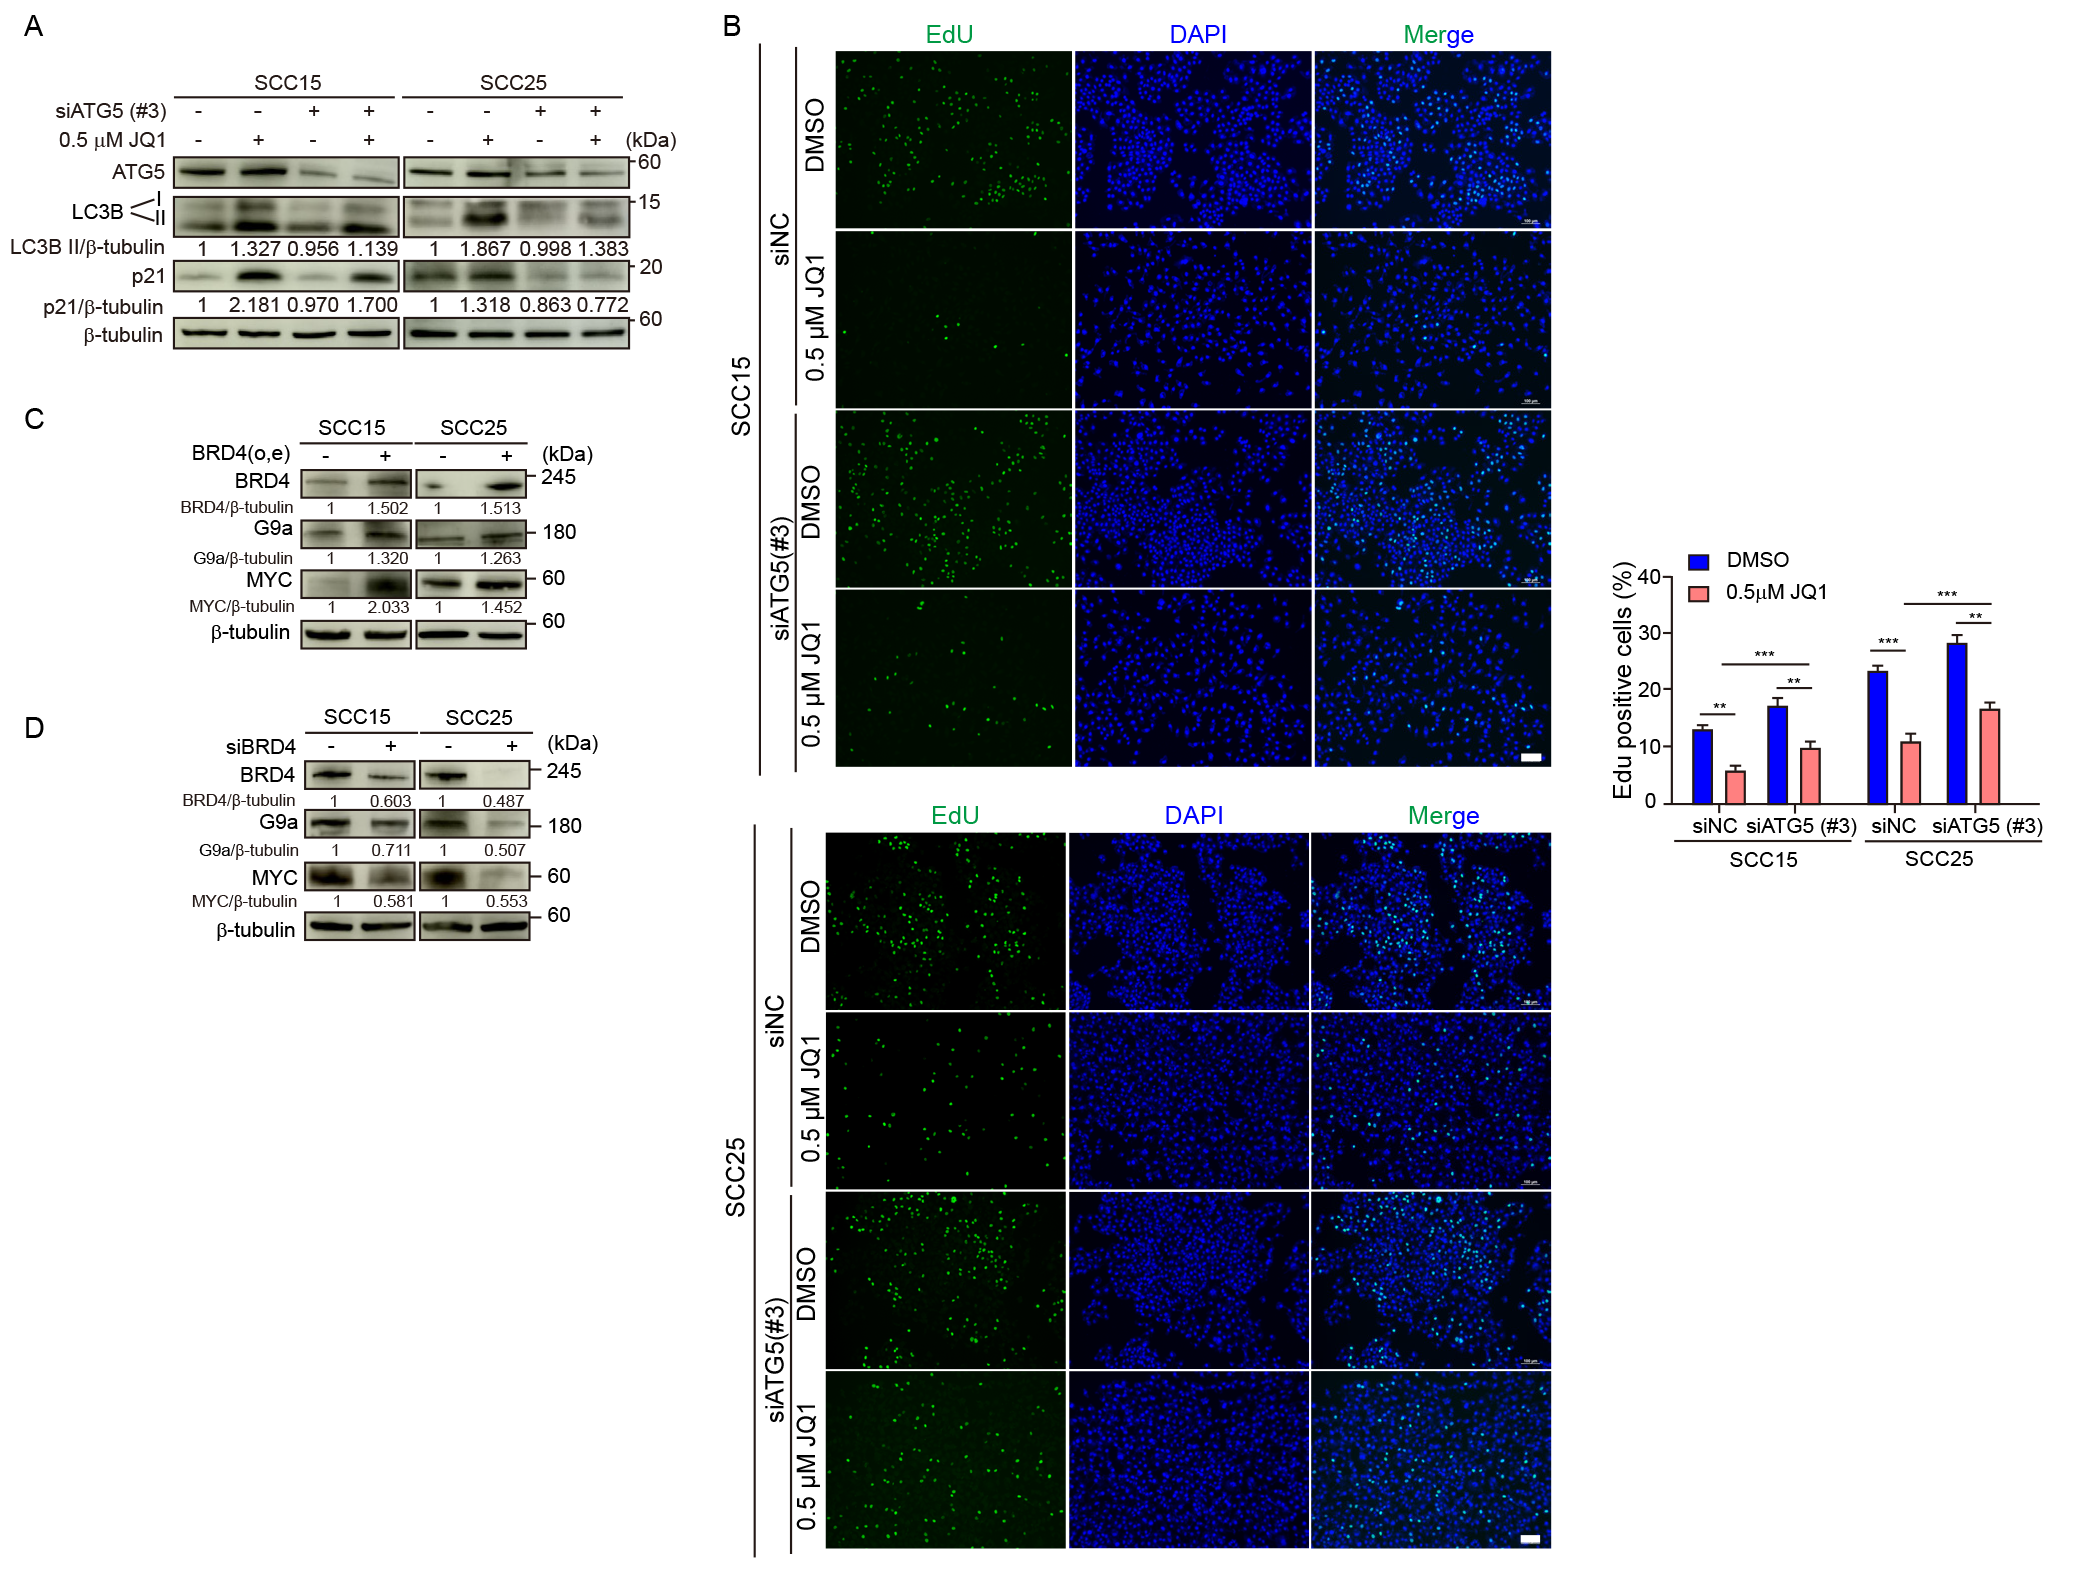


Figure S4. **A)**Western blotting of LC3B (I/II), ATG5 and p21 in SCC15 and SCC25 cells transfected with siATG5 (#3) or control siRNA and treated with 0.5 μM JQ1 (DMSO as control). **B)** Representative images (left) and quantification (right) of EdU incorporation in SCC15 and SCC25 cells transfected with siATG5 (#3) or control siRNA and treated with DMSO or 0.5 μM JQ1 (n = 3; one-way ANOVA with LSD post hoc multiple comparison test). Scale bar = 100 μm. **C)** Western blotting for G9a, BRD4 and MYC in SCC15 and SCC25 cells transduced with pLV-Empty or pLV-BRD4 (o.e., overexpression). **D)** Western blotting for G9a, BRD4 and MYC in SCC15 and SCC25 cells transfected with siBRD4 or negative control siRNA.

Figure S5. **A)** Smooth scatterplots comparing methylation levels (β-values) between senescent (Sen) and proliferating (Prolif) cells at promoter CpGIs, gene bodies and enhancer regions (SCC15, top; SCC25, bottom). **B)** Numbers and percentages of significant differential methylation probes (DMPs) located within CpGI regions or outside CpGIs (non-CpGIs). Hyper, Δβ = (Sen − Prolif) > 0, p < 0.05; Hypo, Δβ = (Sen − Prolif) < 0, p < 0.05. **C)** Genome-browser views of representative DMPs near or within the indicated genes in SCC15 or SCC25. Tracks show β-values of Prolif (blue) and Sen (pink) replicates, mean Δβ (Sen − Prolif; green), and p values (red). Senescence-associated promoter CpGI hypermethylated sites are boxed in red..


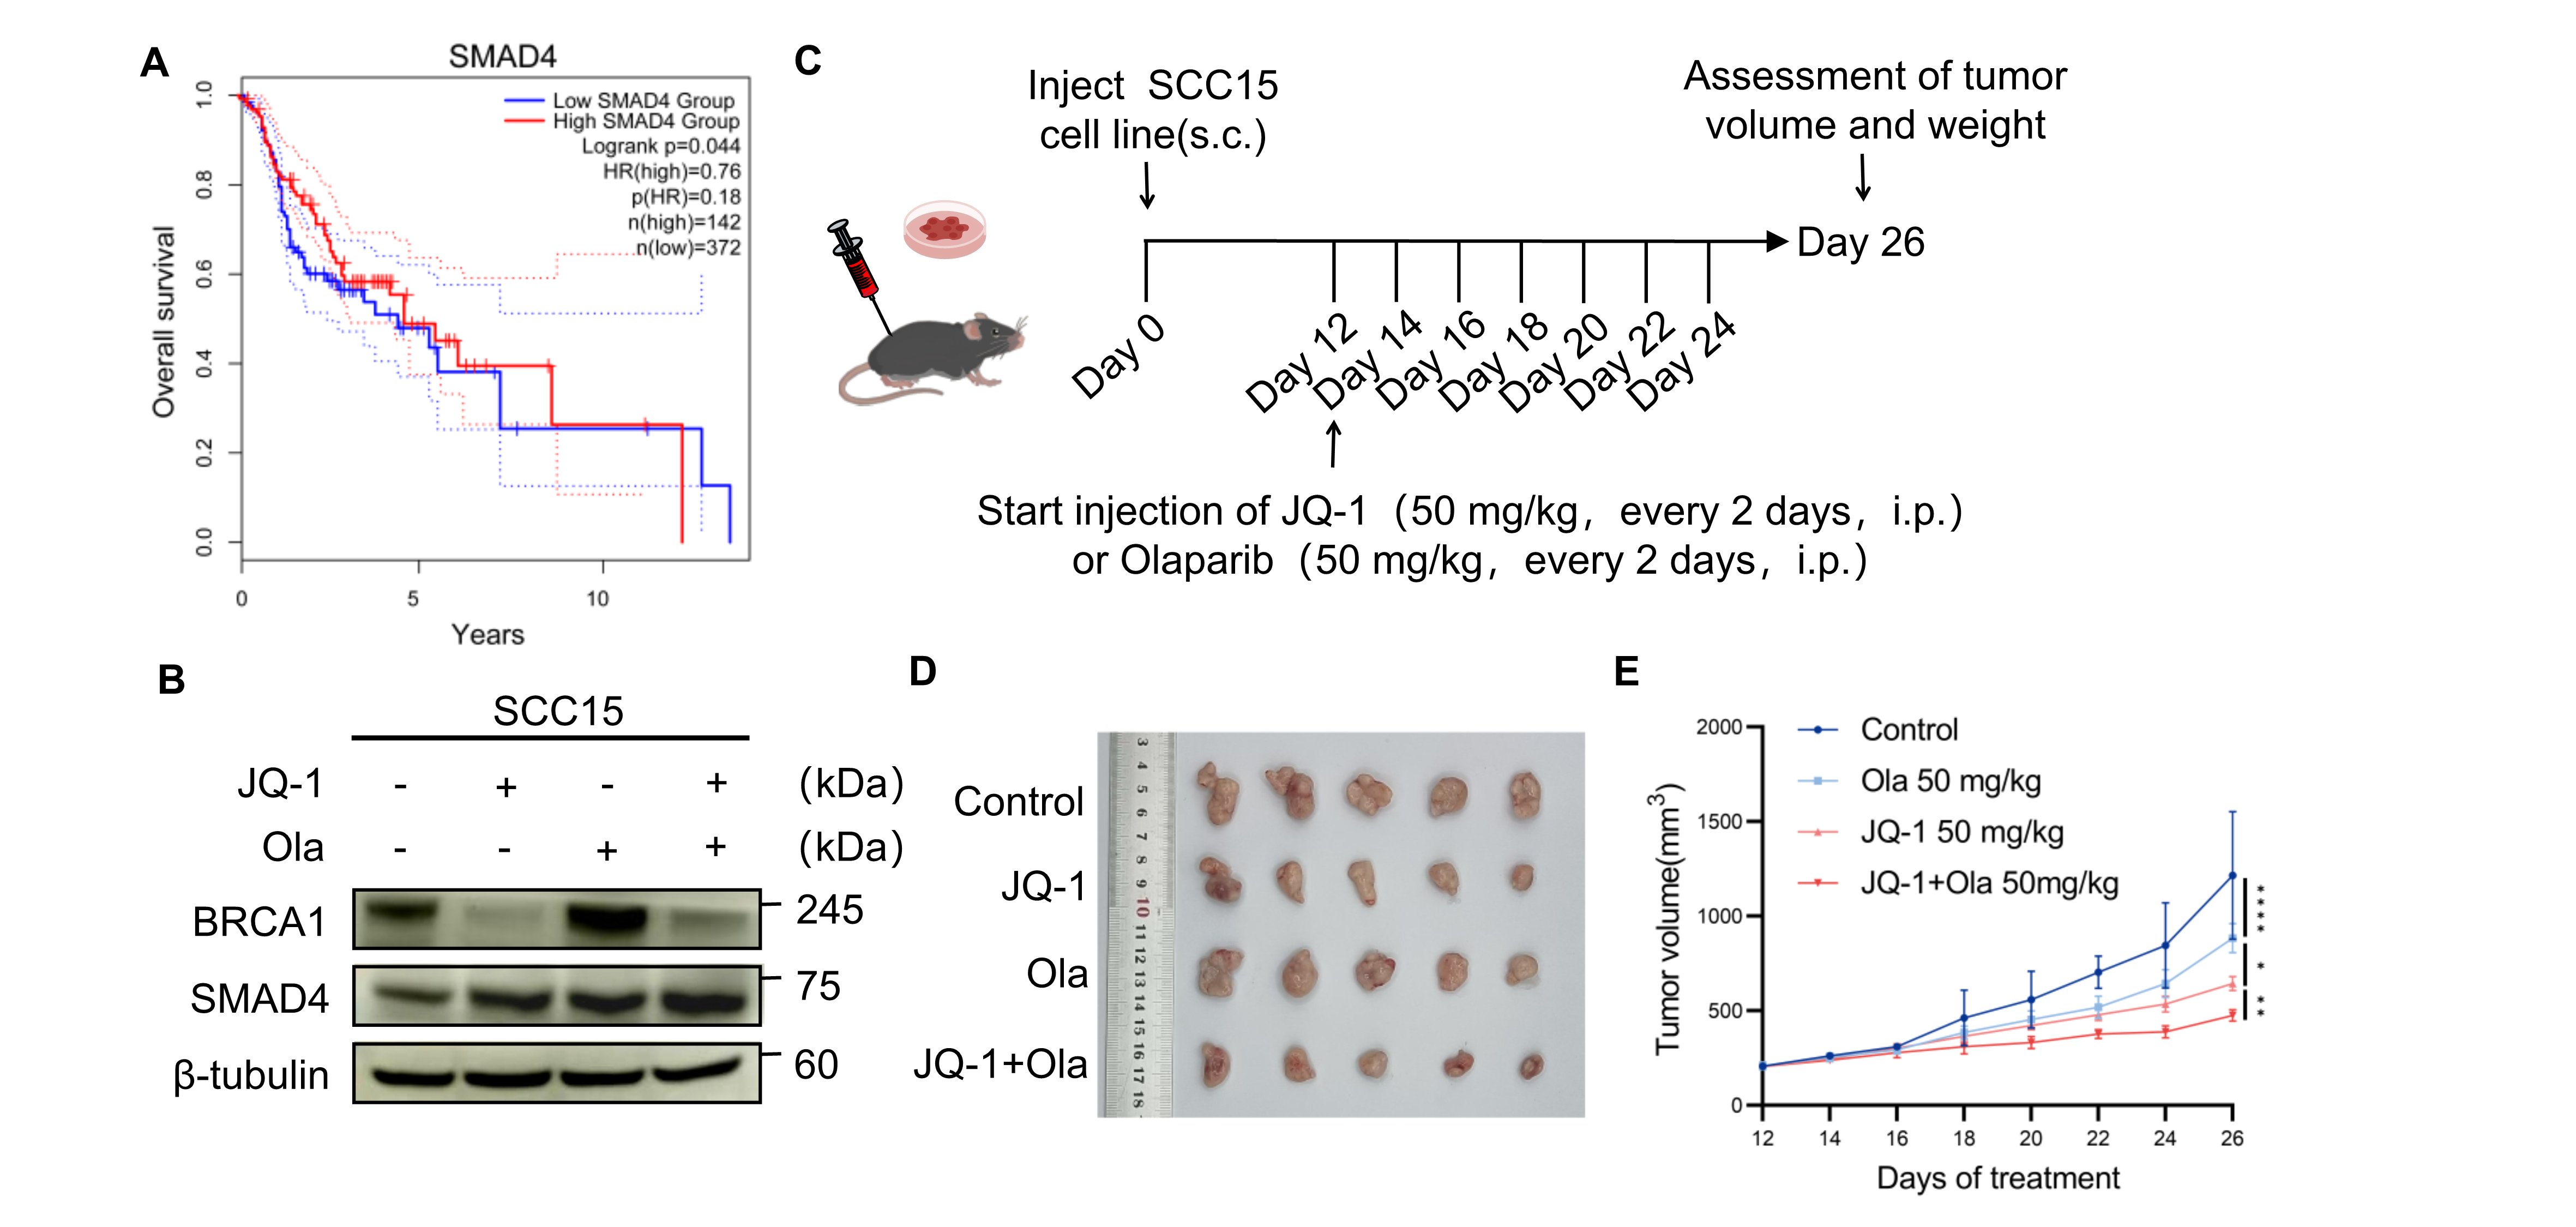


Figure S6. **A)** Kaplan–Meier overall survival analysis of the TCGA head and neck squamous cell carcinoma (TCGA-HNSC) cohort stratified by SMAD4 expression (High, n = 62; Low, n = 406); P = 0.047 (log-rank test). **B)** Immunoblot analysis of BRCA1 and SMAD4 in SCC15 cells treated with JQ-1 and/or olaparib as indicated; β-tubulin served as a loading control. **C)** Schematic of the SCC15 subcutaneous xenograft model and treatment schedule: SCC15 cells were implanted subcutaneously (s.c.), and mice received intraperitoneal (i.p.) injections of JQ-1 (50 mg/kg, every 2 days) and/or olaparib (50 mg/kg, every 2 days) followed by endpoint assessment of tumor volume and weight on day 26. **D)** Representative images of excised tumors from each treatment group at the study endpoint. **E)** Tumor growth curves showing tumor volume (mm³) over the indicated treatment period for control, olaparib, JQ-1, and the combination group; error bars indicate variability within each group, and asterisks denote statistical significance (*p < 0.05; **p < 0.01; ***p < 0.001).
