# Supplementary material
Source: Research Square preprint supplement (doi:10.21203/rs.3.rs-9262139/v1)
Supplement: Supplementary file 2 [file 50314ddf00e76bff57c529b0.xlsx]

## Sheet: GO of down-regulated DEGs
Table S1: GO and KEGG pathway analysis of common down-regulated or up-regulated DEGs between SCC15 and SCC25 after JQ1 addition for 48 h. Biological Processes (BP) of GO analysis for each gene set are shown.
Category	Term	Count	%	PValue	Genes	List Total	Pop Hits	Pop Total	Fold Enrichment	Bonferroni	Benjamini	FDR
GOTERM_BP_DIRECT	GO:0051301~cell division	145	5.63107	2.92474e-39	ENSG00000175063, ENSG00000104147, ENSG00000072864, ENSG00000108106, ENSG00000197771, ENSG00000169220, ENSG00000113810, ENSG00000198901, ENSG00000173207, ENSG00000135446, ENSG00000076382, ENSG00000100749, ENSG00000013810, ENSG00000136098, ENSG00000119408, ENSG00000100106, ENSG00000142945, ENSG00000164611, ENSG00000094804, ENSG00000136824, ENSG00000094880, ENSG00000154473, ENSG00000153140, ENSG0000…	2301	383	19308	3.1768	1.75455e-35	1.75455e-35	1.7294e-35
GOTERM_BP_DIRECT	GO:0006260~DNA replication	61	2.36893	1.8261e-24	ENSG00000163918, ENSG00000077514, ENSG00000073111, ENSG00000197299, ENSG00000107815, ENSG00000006634, ENSG00000159335, ENSG00000062822, ENSG00000167325, ENSG00000168496, ENSG00000181938, ENSG00000177084, ENSG00000149136, ENSG00000127586, ENSG00000143476, ENSG00000162599, ENSG00000128951, ENSG00000133119, ENSG00000091651, ENSG00000105821, ENSG00000136982, ENSG00000104738, ENSG00000132780, ENSG0000…	2301	121	19308	4.23024	1.09548e-20	5.47738e-21	5.39886e-21
GOTERM_BP_DIRECT	GO:0006281~DNA repair	96	3.72816	8.05693e-21	ENSG00000160803, ENSG00000183207, ENSG00000174371, ENSG00000163918, ENSG00000041880, ENSG00000129484, ENSG00000197299, ENSG00000158169, ENSG00000154920, ENSG00000133302, ENSG00000077152, ENSG00000110066, ENSG00000062822, ENSG00000167325, ENSG00000115392, ENSG00000166199, ENSG00000169189, ENSG00000136492, ENSG00000168496, ENSG00000140525, ENSG00000276043, ENSG00000126215, ENSG00000177084, ENSG0000…	2301	294	19308	2.73996	4.83335e-17	1.61112e-17	1.58802e-17
GOTERM_BP_DIRECT	GO:0007059~chromosome segregation	39	1.51456	3.51225e-16	ENSG00000104147, ENSG00000072864, ENSG00000180198, ENSG00000198586, ENSG00000131747, ENSG00000169220, ENSG00000080986, ENSG00000138778, ENSG00000203760, ENSG00000112742, ENSG00000076382, ENSG00000117650, ENSG00000166797, ENSG00000184661, ENSG00000119408, ENSG00000154839, ENSG00000159055, ENSG00000089685, ENSG00000161888, ENSG00000149636, ENSG00000120253, ENSG00000012048, ENSG00000123485, ENSG0000…	2301	76	19308	4.30598	1.99807e-12	5.2675e-13	5.19199e-13
GOTERM_BP_DIRECT	GO:0000278~mitotic cell cycle	58	2.25243	6.48138e-16	ENSG00000213024, ENSG00000097007, ENSG00000169220, ENSG00000137822, ENSG00000171148, ENSG00000177602, ENSG00000167325, ENSG00000117650, ENSG00000166197, ENSG00000136098, ENSG00000154839, ENSG00000126216, ENSG00000177084, ENSG00000147316, ENSG00000094804, ENSG00000163808, ENSG00000094880, ENSG00000156970, ENSG00000196230, ENSG00000132341, ENSG00000117724, ENSG00000166483, ENSG00000138160, ENSG0000…	2301	154	19308	3.1603	3.99614e-12	7.77636e-13	7.66488e-13
GOTERM_BP_DIRECT	GO:0000070~mitotic sister chromatid segregation	25	0.970874	6.72341e-15	ENSG00000137804, ENSG00000080986, ENSG00000113810, ENSG00000146918, ENSG00000076382, ENSG00000186185, ENSG00000117650, ENSG00000121621, ENSG00000166851, ENSG00000122952, ENSG00000134690, ENSG00000184445, ENSG00000149636, ENSG00000154473, ENSG00000135476, ENSG00000237649, ENSG00000132341, ENSG00000128908, ENSG00000138160, ENSG00000123219, ENSG00000163535, ENSG00000164109, ENSG00000128944, ENSG0000…	2301	35	19308	5.99367	4.06274e-11	6.72229e-12	6.62592e-12
GOTERM_BP_DIRECT	GO:0007049~cell cycle	96	3.72816	2.24102e-14	ENSG00000104147, ENSG00000155254, ENSG00000073111, ENSG00000198586, ENSG00000113810, ENSG00000075131, ENSG00000007968, ENSG00000173207, ENSG00000158402, ENSG00000086712, ENSG00000184661, ENSG00000119969, ENSG00000159055, ENSG00000100106, ENSG00000140525, ENSG00000091732, ENSG00000125885, ENSG00000276043, ENSG00000178053, ENSG00000127586, ENSG00000102882, ENSG00000012048, ENSG00000136824, ENSG0000…	2301	359	19308	2.24387	1.34537e-10	1.92055e-11	1.89302e-11
GOTERM_BP_DIRECT	GO:0007052~mitotic spindle organization	31	1.20388	8.65557e-14	ENSG00000090273, ENSG00000180198, ENSG00000119383, ENSG00000080986, ENSG00000138778, ENSG00000134057, ENSG00000112742, ENSG00000117632, ENSG00000178999, ENSG00000013810, ENSG00000166851, ENSG00000134690, ENSG00000119408, ENSG00000087586, ENSG00000089685, ENSG00000090889, ENSG00000145632, ENSG00000075702, ENSG00000152253, ENSG00000153044, ENSG00000068796, ENSG00000175216, ENSG00000107949, ENSG0000…	2301	57	19308	4.5636	5.19498e-10	6.49059e-11	6.39755e-11
GOTERM_BP_DIRECT	GO:0006974~cellular response to DNA damage stimulus	76	2.95146	4.40162e-12	ENSG00000160803, ENSG00000174013, ENSG00000197299, ENSG00000165819, ENSG00000198586, ENSG00000097007, ENSG00000039123, ENSG00000075131, ENSG00000133302, ENSG00000077152, ENSG00000092470, ENSG00000100749, ENSG00000168411, ENSG00000118515, ENSG00000115392, ENSG00000166439, ENSG00000125885, ENSG00000126215, ENSG00000013573, ENSG00000102882, ENSG00000012048, ENSG00000143476, ENSG00000133315, ENSG0000…	2301	278	19308	2.29398	2.64051e-08	2.93392e-09	2.89186e-09
GOTERM_BP_DIRECT	GO:0045893~positive regulation of transcription, DNA-templated	150	5.82524	9.36485e-12	ENSG00000106689, ENSG00000213024, ENSG00000090971, ENSG00000104825, ENSG00000171148, ENSG00000166197, ENSG00000090447, ENSG00000012048, ENSG00000128245, ENSG00000197122, ENSG00000156650, ENSG00000176046, ENSG00000110931, ENSG00000169592, ENSG00000110492, ENSG00000138685, ENSG00000065427, ENSG00000169071, ENSG00000020633, ENSG00000143621, ENSG00000116750, ENSG00000188372, ENSG00000147548, ENSG0000…	2301	725	19308	1.7361	5.61797e-08	5.61797e-09	5.53744e-09
GOTERM_BP_DIRECT	GO:0007094~mitotic spindle assembly checkpoint	21	0.815534	1.66066e-11	ENSG00000152253, ENSG00000174442, ENSG00000156970, ENSG00000154473, ENSG00000040275, ENSG00000080986, ENSG00000117724, ENSG00000112742, ENSG00000178999, ENSG00000177602, ENSG00000169679, ENSG00000117399, ENSG00000166851, ENSG00000143228, ENSG00000122952, ENSG00000116670, ENSG00000071539, ENSG00000184445, ENSG00000164109, ENSG00000089685, ENSG00000161888	2301	32	19308	5.50668	9.9623e-08	9.05661e-09	8.92678e-09
GOTERM_BP_DIRECT	GO:0000398~mRNA splicing, via spliceosome	57	2.21359	7.39725e-10	ENSG00000126254, ENSG00000092199, ENSG00000147274, ENSG00000165819, ENSG00000039123, ENSG00000077312, ENSG00000135486, ENSG00000204392, ENSG00000111196, ENSG00000134597, ENSG00000240682, ENSG00000060688, ENSG00000139168, ENSG00000100941, ENSG00000112081, ENSG00000167088, ENSG00000182004, ENSG00000130520, ENSG00000104897, ENSG00000096746, ENSG00000239306, ENSG00000170860, ENSG00000183684, ENSG0000…	2301	202	19308	2.3678	4.4376e-06	3.69801e-07	3.64499e-07
GOTERM_BP_DIRECT	GO:0007051~spindle organization	14	0.543689	1.40956e-09	ENSG00000099901, ENSG00000112877, ENSG00000066279, ENSG00000175216, ENSG00000169220, ENSG00000112742, ENSG00000170004, ENSG00000076382, ENSG00000178999, ENSG00000138160, ENSG00000148335, ENSG00000087586, ENSG00000128944, ENSG00000127423	2301	17	19308	6.91035	8.45593e-06	6.50459e-07	6.41134e-07
GOTERM_BP_DIRECT	GO:0006310~DNA recombination	32	1.24272	2.11467e-09	ENSG00000136518, ENSG00000183207, ENSG00000174371, ENSG00000095002, ENSG00000012061, ENSG00000197299, ENSG00000157212, ENSG00000020922, ENSG00000154920, ENSG00000152422, ENSG00000172732, ENSG00000029993, ENSG00000079246, ENSG00000182185, ENSG00000169189, ENSG00000139263, ENSG00000126215, ENSG00000012048, ENSG00000164754, ENSG00000160957, ENSG00000114933, ENSG00000175792, ENSG00000169592, ENSG0000…	2301	83	19308	3.23514	1.26858e-05	9.06135e-07	8.93145e-07
GOTERM_BP_DIRECT	GO:0006268~DNA unwinding involved in DNA replication	16	0.621359	2.53861e-09	ENSG00000160957, ENSG00000106028, ENSG00000112118, ENSG00000073111, ENSG00000197299, ENSG00000107815, ENSG00000076003, ENSG00000131153, ENSG00000104738, ENSG00000004700, ENSG00000181938, ENSG00000101003, ENSG00000166508, ENSG00000093009, ENSG00000100297, ENSG00000147536	2301	23	19308	5.83731	1.5229e-05	1.01528e-06	1.00072e-06
GOTERM_BP_DIRECT	GO:0006913~nucleocytoplasmic transport	24	0.932039	5.5609e-09	ENSG00000093000, ENSG00000099901, ENSG00000108559, ENSG00000213024, ENSG00000125450, ENSG00000155561, ENSG00000113569, ENSG00000169220, ENSG00000075188, ENSG00000132341, ENSG00000082898, ENSG00000111581, ENSG00000132661, ENSG00000139496, ENSG00000140350, ENSG00000163002, ENSG00000124789, ENSG00000030066, ENSG00000102900, ENSG00000132182, ENSG00000100401, ENSG00000103126, ENSG00000120253, ENSG0000…	2301	52	19308	3.87283	3.33593e-05	1.98585e-06	1.95738e-06
GOTERM_BP_DIRECT	GO:0000723~telomere maintenance	25	0.970874	5.6275e-09	ENSG00000136518, ENSG00000183207, ENSG00000041880, ENSG00000197299, ENSG00000151876, ENSG00000151612, ENSG00000020922, ENSG00000118655, ENSG00000079246, ENSG00000105173, ENSG00000185379, ENSG00000160957, ENSG00000110958, ENSG00000114933, ENSG00000175792, ENSG00000117748, ENSG00000253729, ENSG00000169592, ENSG00000138346, ENSG00000116750, ENSG00000140451, ENSG00000128908, ENSG00000080345, ENSG0000…	2301	56	19308	3.74604	3.37588e-05	1.98585e-06	1.95738e-06
GOTERM_BP_DIRECT	GO:0006270~DNA replication initiation	17	0.660194	1.16091e-08	ENSG00000091651, ENSG00000112118, ENSG00000198056, ENSG00000073111, ENSG00000076003, ENSG00000104738, ENSG00000065328, ENSG00000163781, ENSG00000101868, ENSG00000085840, ENSG00000146143, ENSG00000105173, ENSG00000166508, ENSG00000093009, ENSG00000100297, ENSG00000094804, ENSG00000014138	2301	28	19308	5.09462	6.96407e-05	3.86906e-06	3.8136e-06
GOTERM_BP_DIRECT	GO:0000724~double-strand break repair via homologous recombination	33	1.28155	1.63871e-08	ENSG00000134758, ENSG00000160949, ENSG00000197299, ENSG00000146263, ENSG00000196584, ENSG00000175643, ENSG00000020922, ENSG00000186280, ENSG00000133302, ENSG00000115233, ENSG00000168411, ENSG00000182185, ENSG00000169189, ENSG00000168496, ENSG00000127922, ENSG00000126215, ENSG00000125885, ENSG00000185379, ENSG00000101773, ENSG00000012048, ENSG00000127423, ENSG00000156831, ENSG00000160957, ENSG0000…	2301	94	19308	2.94582	9.83016e-05	5.17402e-06	5.09985e-06
GOTERM_BP_DIRECT	GO:0006302~double-strand break repair	28	1.08738	2.90401e-08	ENSG00000095002, ENSG00000182979, ENSG00000041880, ENSG00000012061, ENSG00000129484, ENSG00000020922, ENSG00000154920, ENSG00000152422, ENSG00000172732, ENSG00000079246, ENSG00000136492, ENSG00000168496, ENSG00000166439, ENSG00000105393, ENSG00000012048, ENSG00000141510, ENSG00000164754, ENSG00000139618, ENSG00000146670, ENSG00000042088, ENSG00000253729, ENSG00000005156, ENSG00000128908, ENSG0000…	2301	73	19308	3.21852	0.000174197	8.71058e-06	8.58571e-06
GOTERM_BP_DIRECT	GO:0006364~rRNA processing	40	1.5534	3.31405e-08	ENSG00000111615, ENSG00000107833, ENSG00000109536, ENSG00000123064, ENSG00000130713, ENSG00000039123, ENSG00000179409, ENSG00000172336, ENSG00000136271, ENSG00000053372, ENSG00000166197, ENSG00000087269, ENSG00000100029, ENSG00000130826, ENSG00000160214, ENSG00000133316, ENSG00000101361, ENSG00000172183, ENSG00000105202, ENSG00000077348, ENSG00000011260, ENSG00000065268, ENSG00000112578, ENSG0000…	2301	131	19308	2.56218	0.00019879	9.09126e-06	8.96093e-06
GOTERM_BP_DIRECT	GO:0006338~chromatin remodeling	48	1.86408	3.33402e-08	ENSG00000136518, ENSG00000183207, ENSG00000092199, ENSG00000107833, ENSG00000182979, ENSG00000112624, ENSG00000151612, ENSG00000186280, ENSG00000136997, ENSG00000189079, ENSG00000138375, ENSG00000010803, ENSG00000148229, ENSG00000106462, ENSG00000057935, ENSG00000124795, ENSG00000102054, ENSG00000149480, ENSG00000196591, ENSG00000131778, ENSG00000114933, ENSG00000165609, ENSG00000175792, ENSG0000…	2301	173	19308	2.32818	0.000199988	9.09126e-06	8.96093e-06
GOTERM_BP_DIRECT	GO:0007080~mitotic metaphase plate congression	20	0.776699	7.57073e-08	ENSG00000090273, ENSG00000094880, ENSG00000108424, ENSG00000213024, ENSG00000040275, ENSG00000118193, ENSG00000146670, ENSG00000237649, ENSG00000138778, ENSG00000134222, ENSG00000134057, ENSG00000145919, ENSG00000176108, ENSG00000164695, ENSG00000121621, ENSG00000134690, ENSG00000142945, ENSG00000149499, ENSG00000101421, ENSG00000079616	2301	42	19308	3.99578	0.000454065	1.93379e-05	1.90607e-05
GOTERM_BP_DIRECT	GO:0032508~DNA duplex unwinding	28	1.08738	7.73644e-08	ENSG00000183207, ENSG00000163918, ENSG00000197299, ENSG00000049541, ENSG00000020922, ENSG00000079246, ENSG00000136492, ENSG00000125885, ENSG00000125821, ENSG00000144045, ENSG00000013573, ENSG00000127586, ENSG00000160957, ENSG00000133119, ENSG00000112118, ENSG00000131778, ENSG00000175792, ENSG00000136982, ENSG00000111445, ENSG00000170004, ENSG00000004700, ENSG00000138346, ENSG00000132740, ENSG0000…	2301	76	19308	3.09147	0.000464002	1.93379e-05	1.90607e-05
GOTERM_BP_DIRECT	GO:0051726~regulation of cell cycle	73	2.83495	9.955e-08	ENSG00000183207, ENSG00000090097, ENSG00000070444, ENSG00000196363, ENSG00000097007, ENSG00000043143, ENSG00000068489, ENSG00000007968, ENSG00000171148, ENSG00000135446, ENSG00000086712, ENSG00000138035, ENSG00000100029, ENSG00000178053, ENSG00000090447, ENSG00000169429, ENSG00000012048, ENSG00000143476, ENSG00000198176, ENSG00000080839, ENSG00000114933, ENSG00000175792, ENSG00000132382, ENSG0000…	2301	324	19308	1.8906	0.000597022	2.3888e-05	2.35456e-05
GOTERM_BP_DIRECT	GO:1900264~positive regulation of DNA-directed DNA polymerase activity	11	0.427184	1.14868e-07	ENSG00000163918, ENSG00000133119, ENSG00000132646, ENSG00000049541, ENSG00000181938, ENSG00000136982, ENSG00000111445, ENSG00000131153, ENSG00000101003, ENSG00000127586, ENSG00000147536	2301	13	19308	7.10019	0.000688859	2.65037e-05	2.61237e-05
GOTERM_BP_DIRECT	GO:0006261~DNA-dependent DNA replication	16	0.621359	1.98922e-07	ENSG00000163918, ENSG00000133119, ENSG00000077514, ENSG00000197771, ENSG00000198554, ENSG00000111328, ENSG00000049541, ENSG00000065268, ENSG00000106628, ENSG00000111445, ENSG00000062822, ENSG00000100479, ENSG00000051341, ENSG00000177084, ENSG00000147536, ENSG00000148229	2301	29	19308	4.62959	0.00119262	4.41976e-05	4.3564e-05
GOTERM_BP_DIRECT	GO:0036297~interstrand cross-link repair	18	0.699029	4.48301e-07	ENSG00000181544, ENSG00000221829, ENSG00000131944, ENSG00000012061, ENSG00000111247, ENSG00000158169, ENSG00000198924, ENSG00000118655, ENSG00000168411, ENSG00000115392, ENSG00000187741, ENSG00000116062, ENSG00000125319, ENSG00000140525, ENSG00000126215, ENSG00000185379, ENSG00000144554, ENSG00000109674	2301	38	19308	3.97475	0.00268575	9.60486e-05	9.46716e-05
GOTERM_BP_DIRECT	GO:0000086~G2/M transition of mitotic cell cycle	23	0.893204	6.52067e-07	ENSG00000132688, ENSG00000111206, ENSG00000134057, ENSG00000214517, ENSG00000170312, ENSG00000158402, ENSG00000122966, ENSG00000164045, ENSG00000145604, ENSG00000166851, ENSG00000166483, ENSG00000120539, ENSG00000101224, ENSG00000087586, ENSG00000149554, ENSG00000089685, ENSG00000145386, ENSG00000127564, ENSG00000183765, ENSG00000123374, ENSG00000057935, ENSG00000165304, ENSG00000111907	2301	60	19308	3.2166	0.00390411	0.000134888	0.000132954
GOTERM_BP_DIRECT	GO:0000727~double-strand break repair via break-induced replication	10	0.38835	7.46985e-07	ENSG00000112118, ENSG00000073111, ENSG00000076003, ENSG00000166508, ENSG00000131153, ENSG00000104738, ENSG00000093009, ENSG00000100297, ENSG00000147536, ENSG00000172732	2301	12	19308	6.99261	0.00447114	0.000149372	0.000147231
GOTERM_BP_DIRECT	GO:0007076~mitotic chromosome condensation	12	0.466019	9.56002e-07	ENSG00000183955, ENSG00000136824, ENSG00000166851, ENSG00000109805, ENSG00000116273, ENSG00000137804, ENSG00000146670, ENSG00000025770, ENSG00000010292, ENSG00000113810, ENSG00000121152, ENSG00000151503	2301	18	19308	5.59409	0.00571864	0.000185002	0.00018235
GOTERM_BP_DIRECT	GO:0032543~mitochondrial translation	30	1.16505	1.32208e-06	ENSG00000172172, ENSG00000132313, ENSG00000180992, ENSG00000111639, ENSG00000059691, ENSG00000137547, ENSG00000114686, ENSG00000144029, ENSG00000182180, ENSG00000116221, ENSG00000143436, ENSG00000154719, ENSG00000125445, ENSG00000122140, ENSG00000130348, ENSG00000082515, ENSG00000116898, ENSG00000112110, ENSG00000074071, ENSG00000174547, ENSG00000112651, ENSG00000118246, ENSG00000175756, ENSG0000…	2301	96	19308	2.62223	0.00789978	0.000247848	0.000244295
GOTERM_BP_DIRECT	GO:0007099~centriole replication	13	0.504854	1.62121e-06	ENSG00000075702, ENSG00000112877, ENSG00000103995, ENSG00000136861, ENSG00000176225, ENSG00000198920, ENSG00000170037, ENSG00000139323, ENSG00000156876, ENSG00000151849, ENSG00000164118, ENSG00000123374, ENSG00000142731	2301	22	19308	4.9584	0.00967852	0.000294717	0.000290492
GOTERM_BP_DIRECT	GO:0008283~cell proliferation	46	1.78641	2.24965e-06	ENSG00000198363, ENSG00000012061, ENSG00000081479, ENSG00000020922, ENSG00000136877, ENSG00000139323, ENSG00000136997, ENSG00000158402, ENSG00000178999, ENSG00000013810, ENSG00000055130, ENSG00000079246, ENSG00000166199, ENSG00000174808, ENSG00000185650, ENSG00000100029, ENSG00000142208, ENSG00000188986, ENSG00000123384, ENSG00000070614, ENSG00000071626, ENSG00000165304, ENSG00000027869, ENSG0000…	2301	186	19308	2.07523	0.013405	0.000396931	0.000391241
GOTERM_BP_DIRECT	GO:0007088~regulation of mitotic nuclear division	13	0.504854	3.02152e-06	ENSG00000105971, ENSG00000180198, ENSG00000112029, ENSG00000156509, ENSG00000136122, ENSG00000158402, ENSG00000117650, ENSG00000138182, ENSG00000184661, ENSG00000124006, ENSG00000148773, ENSG00000100462, ENSG00000127564	2301	23	19308	4.74282	0.0179628	0.000517888	0.000510464
GOTERM_BP_DIRECT	GO:0030174~regulation of DNA-dependent DNA replication initiation	10	0.38835	5.42806e-06	ENSG00000112118, ENSG00000073111, ENSG00000065268, ENSG00000112312, ENSG00000076003, ENSG00000166508, ENSG00000140534, ENSG00000104738, ENSG00000100297, ENSG00000167513	2301	14	19308	5.99367	0.0320385	0.000904525	0.000891558
GOTERM_BP_DIRECT	GO:0007098~centrosome cycle	18	0.699029	7.5584e-06	ENSG00000213465, ENSG00000213024, ENSG00000092036, ENSG00000137814, ENSG00000152240, ENSG00000196584, ENSG00000153140, ENSG00000175216, ENSG00000136861, ENSG00000170004, ENSG00000170312, ENSG00000249115, ENSG00000166851, ENSG00000166803, ENSG00000164118, ENSG00000012048, ENSG00000147874, ENSG00000168944	2301	45	19308	3.35645	0.0443304	0.00122548	0.00120791
GOTERM_BP_DIRECT	GO:0006271~DNA strand elongation involved in DNA replication	8	0.31068	9.76097e-06	ENSG00000163918, ENSG00000133119, ENSG00000077514, ENSG00000112118, ENSG00000101868, ENSG00000106628, ENSG00000166508, ENSG00000104738	2301	9	19308	7.45879	0.0568749	0.00153942	0.00151735
GOTERM_BP_DIRECT	GO:0010971~positive regulation of G2/M transition of mitotic cell cycle	14	0.543689	1.00079e-05	ENSG00000112029, ENSG00000134057, ENSG00000170312, ENSG00000158402, ENSG00000135446, ENSG00000110092, ENSG00000167325, ENSG00000164045, ENSG00000161692, ENSG00000182185, ENSG00000179051, ENSG00000101224, ENSG00000143476, ENSG00000057935	2301	29	19308	4.05089	0.0582708	0.00153942	0.00151735
GOTERM_BP_DIRECT	GO:0006325~chromatin organization	55	2.13592	1.31259e-05	ENSG00000177565, ENSG00000196363, ENSG00000198586, ENSG00000198945, ENSG00000177602, ENSG00000110066, ENSG00000119403, ENSG00000276043, ENSG00000105393, ENSG00000100462, ENSG00000123143, ENSG00000124795, ENSG00000183955, ENSG00000149480, ENSG00000080839, ENSG00000089094, ENSG00000105821, ENSG00000071462, ENSG00000070495, ENSG00000173894, ENSG00000152455, ENSG00000142453, ENSG00000147548, ENSG0000…	2301	253	19308	1.82416	0.0757223	0.00196856	0.00194034
GOTERM_BP_DIRECT	GO:0010032~meiotic chromosome condensation	7	0.271845	1.78601e-05	ENSG00000136824, ENSG00000025770, ENSG00000010292, ENSG00000113810, ENSG00000121152, ENSG00000151503, ENSG00000149503	2301	7	19308	8.39113	0.101603	0.00261324	0.00257577
GOTERM_BP_DIRECT	GO:0000281~mitotic cytokinesis	22	0.854369	1.98542e-05	ENSG00000137807, ENSG00000136108, ENSG00000137804, ENSG00000135476, ENSG00000114346, ENSG00000112984, ENSG00000114993, ENSG00000130340, ENSG00000173548, ENSG00000117632, ENSG00000178999, ENSG00000122966, ENSG00000115163, ENSG00000166851, ENSG00000011426, ENSG00000134690, ENSG00000138180, ENSG00000101421, ENSG00000089685, ENSG00000161800, ENSG00000090889, ENSG00000149503	2301	67	19308	2.7553	0.112287	0.00283584	0.00279518
GOTERM_BP_DIRECT	GO:0045944~positive regulation of transcription from RNA polymerase II promoter	190	7.37864	3.19884e-05	ENSG00000111912, ENSG00000106689, ENSG00000143190, ENSG00000147274, ENSG00000106327, ENSG00000186918, ENSG00000097007, ENSG00000067955, ENSG00000083635, ENSG00000263001, ENSG00000170689, ENSG00000079387, ENSG00000184584, ENSG00000276043, ENSG00000139083, ENSG00000090447, ENSG00000168813, ENSG00000126453, ENSG00000102882, ENSG00000012048, ENSG00000124795, ENSG00000112715, ENSG00000198176, ENSG0000…	2301	1204	19308	1.32418	0.174612	0.00446275	0.00439877
GOTERM_BP_DIRECT	GO:0060236~regulation of mitotic spindle organization	11	0.427184	3.35454e-05	ENSG00000013810, ENSG00000213024, ENSG00000041880, ENSG00000121957, ENSG00000151849, ENSG00000088325, ENSG00000134222, ENSG00000136122, ENSG00000123473, ENSG00000105255, ENSG00000156876	2301	20	19308	4.61512	0.182286	0.00457361	0.00450804
GOTERM_BP_DIRECT	GO:1903241~U2-type prespliceosome assembly	12	0.466019	3.78128e-05	ENSG00000139343, ENSG00000125835, ENSG00000143977, ENSG00000104897, ENSG00000167088, ENSG00000125743, ENSG00000183431, ENSG00000137656, ENSG00000189091, ENSG00000100410, ENSG00000182004, ENSG00000134597	2301	24	19308	4.19557	0.202954	0.00504086	0.0049686
GOTERM_BP_DIRECT	GO:0000122~negative regulation of transcription from RNA polymerase II promoter	157	6.09709	4.47705e-05	ENSG00000074800, ENSG00000070444, ENSG00000067955, ENSG00000171940, ENSG00000111199, ENSG00000119403, ENSG00000276043, ENSG00000139083, ENSG00000147316, ENSG00000106443, ENSG00000277258, ENSG00000112715, ENSG00000114739, ENSG00000107249, ENSG00000113648, ENSG00000006704, ENSG00000196792, ENSG00000113649, ENSG00000129173, ENSG00000156374, ENSG00000196793, ENSG00000181472, ENSG00000109705, ENSG0000…	2301	969	19308	1.35955	0.235539	0.00583865	0.00575495
GOTERM_BP_DIRECT	GO:0071456~cellular response to hypoxia	35	1.35922	5.43302e-05	ENSG00000073756, ENSG00000113739, ENSG00000134057, ENSG00000197930, ENSG00000204397, ENSG00000002330, ENSG00000136997, ENSG00000003402, ENSG00000100644, ENSG00000136492, ENSG00000185650, ENSG00000101412, ENSG00000142208, ENSG00000162433, ENSG00000141510, ENSG00000215021, ENSG00000104332, ENSG00000112759, ENSG00000112715, ENSG00000064393, ENSG00000197122, ENSG00000106638, ENSG00000152455, ENSG0000…	2301	143	19308	2.05377	0.278148	0.00693461	0.0068352
GOTERM_BP_DIRECT	GO:0006418~tRNA aminoacylation for protein translation	12	0.466019	6.0266e-05	ENSG00000136628, ENSG00000117593, ENSG00000133706, ENSG00000134905, ENSG00000172053, ENSG00000134684, ENSG00000134440, ENSG00000166986, ENSG00000196305, ENSG00000065427, ENSG00000145982, ENSG00000204394	2301	25	19308	4.02774	0.303402	0.007532	0.00742402
GOTERM_BP_DIRECT	GO:0006275~regulation of DNA replication	17	0.660194	6.21797e-05	ENSG00000183207, ENSG00000136518, ENSG00000177311, ENSG00000132646, ENSG00000112029, ENSG00000114933, ENSG00000043143, ENSG00000175792, ENSG00000112312, ENSG00000136982, ENSG00000077684, ENSG00000169592, ENSG00000116750, ENSG00000128908, ENSG00000108055, ENSG00000145386, ENSG00000148229	2301	47	19308	3.03509	0.311354	0.00761257	0.00750344
GOTERM_BP_DIRECT	GO:1905820~positive regulation of chromosome separation	7	0.271845	6.41796e-05	ENSG00000136824, ENSG00000109805, ENSG00000188313, ENSG00000025770, ENSG00000113810, ENSG00000146918, ENSG00000121152	2301	8	19308	7.34224	0.319567	0.00770027	0.00758988
GOTERM_BP_DIRECT	GO:0051028~mRNA transport	25	0.970874	6.76431e-05	ENSG00000093000, ENSG00000213024, ENSG00000135486, ENSG00000111196, ENSG00000197879, ENSG00000159217, ENSG00000163002, ENSG00000253626, ENSG00000102900, ENSG00000185650, ENSG00000120253, ENSG00000058804, ENSG00000108559, ENSG00000125450, ENSG00000155561, ENSG00000132507, ENSG00000153140, ENSG00000075188, ENSG00000112531, ENSG00000082898, ENSG00000139496, ENSG00000162385, ENSG00000124789, ENSG0000…	2301	88	19308	2.38384	0.33356	0.00785104	0.00773849
GOTERM_BP_DIRECT	GO:0006468~protein phosphorylation	90	3.49515	6.80537e-05	ENSG00000071054, ENSG00000263528, ENSG00000090376, ENSG00000198586, ENSG00000097007, ENSG00000154845, ENSG00000065534, ENSG00000214517, ENSG00000135446, ENSG00000177602, ENSG00000171105, ENSG00000100749, ENSG00000117650, ENSG00000135362, ENSG00000118515, ENSG00000136098, ENSG00000119408, ENSG00000204314, ENSG00000103653, ENSG00000123143, ENSG00000102882, ENSG00000275993, ENSG00000165304, ENSG0000…	2301	501	19308	1.50739	0.335199	0.00785104	0.00773849
GOTERM_BP_DIRECT	GO:0051256~mitotic spindle midzone assembly	8	0.31068	7.19162e-05	ENSG00000137807, ENSG00000134690, ENSG00000089685, ENSG00000161800, ENSG00000198901, ENSG00000090889, ENSG00000149503, ENSG00000178999	2301	11	19308	6.10264	0.350427	0.00798936	0.00787482
GOTERM_BP_DIRECT	GO:0051984~positive regulation of chromosome segregation	8	0.31068	7.19162e-05	ENSG00000136824, ENSG00000070950, ENSG00000109805, ENSG00000025770, ENSG00000113810, ENSG00000146918, ENSG00000121152, ENSG00000094804	2301	11	19308	6.10264	0.350427	0.00798936	0.00787482
GOTERM_BP_DIRECT	GO:0006284~base-excision repair	14	0.543689	7.69646e-05	ENSG00000076248, ENSG00000129484, ENSG00000065057, ENSG00000117748, ENSG00000132781, ENSG00000138346, ENSG00000073050, ENSG00000051341, ENSG00000168496, ENSG00000189403, ENSG00000106399, ENSG00000140398, ENSG00000109674, ENSG00000105486	2301	34	19308	3.45517	0.369807	0.00839474	0.0082744
GOTERM_BP_DIRECT	GO:0000082~G1/S transition of mitotic cell cycle	22	0.854369	0.000101598	ENSG00000183856, ENSG00000105810, ENSG00000123080, ENSG00000180198, ENSG00000006634, ENSG00000132780, ENSG00000136997, ENSG00000135446, ENSG00000110092, ENSG00000164045, ENSG00000147889, ENSG00000145604, ENSG00000055130, ENSG00000100526, ENSG00000101412, ENSG00000105173, ENSG00000177084, ENSG00000101773, ENSG00000106462, ENSG00000123374, ENSG00000122641, ENSG00000145632	2301	74	19308	2.49466	0.456387	0.0108463	0.0106908
GOTERM_BP_DIRECT	GO:0045892~negative regulation of transcription, DNA-templated	102	3.96117	0.000103057	ENSG00000074800, ENSG00000143190, ENSG00000123064, ENSG00000115318, ENSG00000104824, ENSG00000171940, ENSG00000226742, ENSG00000101158, ENSG00000090447, ENSG00000100462, ENSG00000012048, ENSG00000196792, ENSG00000197122, ENSG00000156650, ENSG00000156374, ENSG00000112312, ENSG00000117724, ENSG00000152455, ENSG00000188372, ENSG00000081059, ENSG00000101945, ENSG00000109381, ENSG00000149600, ENSG0000…	2301	590	19308	1.45067	0.461124	0.0108463	0.0106908
GOTERM_BP_DIRECT	GO:0032259~methylation	27	1.04854	0.000118066	ENSG00000176890, ENSG00000165819, ENSG00000116984, ENSG00000176974, ENSG00000133027, ENSG00000150540, ENSG00000110066, ENSG00000138050, ENSG00000123427, ENSG00000057657, ENSG00000101574, ENSG00000165644, ENSG00000144401, ENSG00000132423, ENSG00000093010, ENSG00000105202, ENSG00000070495, ENSG00000179299, ENSG00000197006, ENSG00000166741, ENSG00000100416, ENSG00000088305, ENSG00000165671, ENSG0000…	2301	102	19308	2.22118	0.50753	0.0122117	0.0120366
GOTERM_BP_DIRECT	GO:0051383~kinetochore organization	6	0.23301	0.00012916	ENSG00000136824, ENSG00000153044, ENSG00000143228, ENSG00000080986, ENSG00000113810, ENSG00000167513	2301	6	19308	8.39113	0.53924	0.0131327	0.0129444
GOTERM_BP_DIRECT	GO:0034501~protein localization to kinetochore	8	0.31068	0.00015479	ENSG00000174442, ENSG00000154473, ENSG00000040275, ENSG00000112742, ENSG00000137812, ENSG00000172167, ENSG00000170312, ENSG00000178999	2301	12	19308	5.59409	0.604915	0.0154764	0.0152545
GOTERM_BP_DIRECT	GO:0071479~cellular response to ionizing radiation	15	0.582524	0.00017081	ENSG00000139618, ENSG00000197299, ENSG00000105835, ENSG00000151876, ENSG00000171792, ENSG00000114346, ENSG00000111247, ENSG00000134852, ENSG00000186280, ENSG00000115221, ENSG00000138376, ENSG00000128908, ENSG00000163565, ENSG00000012048, ENSG00000141510	2301	41	19308	3.06993	0.641124	0.0167982	0.0165574
GOTERM_BP_DIRECT	GO:0071897~DNA biosynthetic process	13	0.504854	0.000180052	ENSG00000183814, ENSG00000077514, ENSG00000197122, ENSG00000176890, ENSG00000106628, ENSG00000117724, ENSG00000005156, ENSG00000062822, ENSG00000113083, ENSG00000051341, ENSG00000164362, ENSG00000148229, ENSG00000105486	2301	32	19308	3.4089	0.660483	0.0174215	0.0171718
GOTERM_BP_DIRECT	GO:0042981~regulation of apoptotic process	49	1.90291	0.0002048	ENSG00000183207, ENSG00000136938, ENSG00000097007, ENSG00000003402, ENSG00000082512, ENSG00000118515, ENSG00000127946, ENSG00000126453, ENSG00000100065, ENSG00000175792, ENSG00000127191, ENSG00000176720, ENSG00000158796, ENSG00000196954, ENSG00000137752, ENSG00000140350, ENSG00000145604, ENSG00000113083, ENSG00000056558, ENSG00000141527, ENSG00000182872, ENSG00000167815, ENSG00000101189, ENSG0000…	2301	240	19308	1.71319	0.707334	0.019364	0.0190864
GOTERM_BP_DIRECT	GO:0035066~positive regulation of histone acetylation	12	0.466019	0.000206583	ENSG00000183207, ENSG00000125538, ENSG00000132382, ENSG00000157212, ENSG00000165732, ENSG00000137486, ENSG00000102882, ENSG00000012048, ENSG00000009954, ENSG00000108773, ENSG00000124795, ENSG00000162302	2301	28	19308	3.5962	0.710449	0.019364	0.0190864
GOTERM_BP_DIRECT	GO:0042493~response to drug	57	2.21359	0.000222664	ENSG00000073756, ENSG00000133027, ENSG00000135446, ENSG00000196839, ENSG00000083720, ENSG00000100300, ENSG00000107331, ENSG00000162433, ENSG00000104332, ENSG00000196591, ENSG00000197122, ENSG00000104899, ENSG00000076555, ENSG00000181031, ENSG00000171793, ENSG00000117724, ENSG00000082898, ENSG00000110492, ENSG00000150630, ENSG00000110092, ENSG00000113083, ENSG00000079215, ENSG00000254087, ENSG0000…	2301	293	19308	1.6324	0.737082	0.0205502	0.0202556
GOTERM_BP_DIRECT	GO:0051225~spindle assembly	14	0.543689	0.000283893	ENSG00000238105, ENSG00000092036, ENSG00000196230, ENSG00000137814, ENSG00000180198, ENSG00000152240, ENSG00000137822, ENSG00000168061, ENSG00000249115, ENSG00000117650, ENSG00000128908, ENSG00000119408, ENSG00000126216, ENSG00000147874	2301	38	19308	3.09147	0.817922	0.0258042	0.0254343
GOTERM_BP_DIRECT	GO:0051444~negative regulation of ubiquitin-protein transferase activity	8	0.31068	0.000300841	ENSG00000117399, ENSG00000147889, ENSG00000156970, ENSG00000154473, ENSG00000112029, ENSG00000097007, ENSG00000166170, ENSG00000164109	2301	13	19308	5.16377	0.835528	0.0269365	0.0265503
GOTERM_BP_DIRECT	GO:0000079~regulation of cyclin-dependent protein serine/threonine kinase activity	17	0.660194	0.000306017	ENSG00000123080, ENSG00000197299, ENSG00000107949, ENSG00000107937, ENSG00000134057, ENSG00000158402, ENSG00000157456, ENSG00000162063, ENSG00000110092, ENSG00000164045, ENSG00000147889, ENSG00000100526, ENSG00000105173, ENSG00000145386, ENSG00000127564, ENSG00000094804, ENSG00000107443	2301	53	19308	2.6915	0.840558	0.026997	0.0266099
GOTERM_BP_DIRECT	GO:0071222~cellular response to lipopolysaccharide	41	1.59223	0.000312995	ENSG00000163739, ENSG00000097007, ENSG00000104825, ENSG00000204397, ENSG00000172216, ENSG00000025434, ENSG00000135446, ENSG00000169248, ENSG00000120217, ENSG00000184588, ENSG00000100300, ENSG00000081041, ENSG00000169429, ENSG00000167601, ENSG00000198053, ENSG00000134326, ENSG00000197122, ENSG00000115008, ENSG00000136244, ENSG00000028137, ENSG00000003436, ENSG00000197646, ENSG00000064932, ENSG0000…	2301	193	19308	1.78257	0.847097	0.0272124	0.0268223
GOTERM_BP_DIRECT	GO:0032212~positive regulation of telomere maintenance via telomerase	13	0.504854	0.000348196	ENSG00000151876, ENSG00000150753, ENSG00000135486, ENSG00000181085, ENSG00000178999, ENSG00000117650, ENSG00000079246, ENSG00000120438, ENSG00000156261, ENSG00000130826, ENSG00000089022, ENSG00000146731, ENSG00000102882	2301	34	19308	3.20837	0.876213	0.0298404	0.0294126
GOTERM_BP_DIRECT	GO:0006606~protein import into nucleus	26	1.00971	0.000358568	ENSG00000065150, ENSG00000093000, ENSG00000149196, ENSG00000069399, ENSG00000105576, ENSG00000108424, ENSG00000213024, ENSG00000198088, ENSG00000133704, ENSG00000182481, ENSG00000102900, ENSG00000142208, ENSG00000141510, ENSG00000215021, ENSG00000108559, ENSG00000125450, ENSG00000113569, ENSG00000132341, ENSG00000169371, ENSG00000111581, ENSG00000132661, ENSG00000056972, ENSG00000124789, ENSG0000…	2301	103	19308	2.11815	0.883683	0.0299575	0.0295281
GOTERM_BP_DIRECT	GO:0051298~centrosome duplication	9	0.349515	0.00035955	ENSG00000072864, ENSG00000103995, ENSG00000139618, ENSG00000175216, ENSG00000080986, ENSG00000123374, ENSG00000123473, ENSG00000168061, ENSG00000156876	2301	17	19308	4.44237	0.884367	0.0299575	0.0295281
GOTERM_BP_DIRECT	GO:0006333~chromatin assembly or disassembly	6	0.23301	0.000407408	ENSG00000149480, ENSG00000149929, ENSG00000170004, ENSG00000152455, ENSG00000105011, ENSG00000009954	2301	7	19308	7.1924	0.913234	0.0330276	0.0325541
GOTERM_BP_DIRECT	GO:0034080~CENP-A containing nucleosome assembly	6	0.23301	0.000407408	ENSG00000104147, ENSG00000159055, ENSG00000142856, ENSG00000132780, ENSG00000203760, ENSG00000123485	2301	7	19308	7.1924	0.913234	0.0330276	0.0325541
GOTERM_BP_DIRECT	GO:0006303~double-strand break repair via nonhomologous end joining	13	0.504854	0.00047291	ENSG00000012061, ENSG00000253729, ENSG00000020922, ENSG00000152422, ENSG00000115233, ENSG00000198924, ENSG00000073050, ENSG00000118655, ENSG00000138375, ENSG00000101868, ENSG00000079246, ENSG00000189403, ENSG00000164104	2301	35	19308	3.11671	0.941437	0.0378265	0.0372842
GOTERM_BP_DIRECT	GO:0051310~metaphase plate congression	8	0.31068	0.000539844	ENSG00000101447, ENSG00000031691, ENSG00000080986, ENSG00000138778, ENSG00000142945, ENSG00000117724, ENSG00000079616, ENSG00000149503	2301	14	19308	4.79493	0.960813	0.0420588	0.0414558
GOTERM_BP_DIRECT	GO:0008608~attachment of spindle microtubules to kinetochore	8	0.31068	0.000539844	ENSG00000152253, ENSG00000143228, ENSG00000154473, ENSG00000080986, ENSG00000137812, ENSG00000129810, ENSG00000161888, ENSG00000178999	2301	14	19308	4.79493	0.960813	0.0420588	0.0414558
GOTERM_BP_DIRECT	GO:0043123~positive regulation of I-kappaB kinase/NF-kappaB signaling	40	1.5534	0.000561094	ENSG00000198121, ENSG00000213024, ENSG00000172175, ENSG00000111711, ENSG00000263528, ENSG00000097007, ENSG00000171680, ENSG00000114346, ENSG00000196126, ENSG00000204397, ENSG00000132274, ENSG00000003402, ENSG00000163362, ENSG00000198959, ENSG00000082512, ENSG00000119408, ENSG00000164251, ENSG00000164054, ENSG00000106100, ENSG00000145632, ENSG00000023445, ENSG00000129353, ENSG00000128284, ENSG0000…	2301	192	19308	1.74815	0.965505	0.0431539	0.0425352
GOTERM_BP_DIRECT	GO:1901796~regulation of signal transduction by p53 class mediator	14	0.543689	0.000655626	ENSG00000183955, ENSG00000064393, ENSG00000074590, ENSG00000178999, ENSG00000135763, ENSG00000118515, ENSG00000142208, ENSG00000087586, ENSG00000149554, ENSG00000178053, ENSG00000089022, ENSG00000100462, ENSG00000183765, ENSG00000143499	2301	41	19308	2.86527	0.980442	0.049726	0.0490132
GOTERM_BP_DIRECT	GO:0008380~RNA splicing	41	1.59223	0.000663124	ENSG00000090470, ENSG00000089280, ENSG00000092199, ENSG00000240344, ENSG00000198783, ENSG00000135486, ENSG00000152601, ENSG00000189091, ENSG00000137168, ENSG00000111196, ENSG00000112183, ENSG00000060688, ENSG00000139343, ENSG00000138398, ENSG00000139168, ENSG00000143977, ENSG00000167088, ENSG00000108561, ENSG00000125743, ENSG00000108883, ENSG00000130520, ENSG00000104897, ENSG00000096746, ENSG0000…	2301	200	19308	1.72018	0.981303	0.049726	0.0490132
GOTERM_BP_DIRECT	GO:1902275~regulation of chromatin organization	7	0.271845	0.000769044	ENSG00000198586, ENSG00000160993, ENSG00000146872, ENSG00000155858, ENSG00000148773, ENSG00000149136, ENSG00000101574	2301	11	19308	5.33981	0.9901	0.0569567	0.0561402
GOTERM_BP_DIRECT	GO:0042771~intrinsic apoptotic signaling pathway in response to DNA damage by p53 class mediator	12	0.466019	0.00078987	ENSG00000110108, ENSG00000069399, ENSG00000064393, ENSG00000095002, ENSG00000139618, ENSG00000176046, ENSG00000164054, ENSG00000078304, ENSG00000183765, ENSG00000163565, ENSG00000141510, ENSG00000176208	2301	32	19308	3.14668	0.991264	0.0577858	0.0569574
GOTERM_BP_DIRECT	GO:0097421~liver regeneration	14	0.543689	0.00084716	ENSG00000132646, ENSG00000176890, ENSG00000175567, ENSG00000136244, ENSG00000172216, ENSG00000136997, ENSG00000110092, ENSG00000146648, ENSG00000138035, ENSG00000087586, ENSG00000127554, ENSG00000100462, ENSG00000106462, ENSG00000163347	2301	42	19308	2.79704	0.993807	0.0612303	0.0603525
GOTERM_BP_DIRECT	GO:1904874~positive regulation of telomerase RNA localization to Cajal body	8	0.31068	0.000908393	ENSG00000183207, ENSG00000145912, ENSG00000120438, ENSG00000175792, ENSG00000150753, ENSG00000156261, ENSG00000130826, ENSG00000146731	2301	15	19308	4.47527	0.995712	0.0619592	0.061071
GOTERM_BP_DIRECT	GO:2000001~regulation of DNA damage checkpoint	8	0.31068	0.000908393	ENSG00000168411, ENSG00000138376, ENSG00000139618, ENSG00000151876, ENSG00000117748, ENSG00000012048, ENSG00000092470, ENSG00000136104	2301	15	19308	4.47527	0.995712	0.0619592	0.061071
GOTERM_BP_DIRECT	GO:1903934~positive regulation of DNA primase activity	5	0.194175	0.000908886	ENSG00000181938, ENSG00000146143, ENSG00000131153, ENSG00000101003, ENSG00000147536	2301	5	19308	8.39113	0.995725	0.0619592	0.061071
GOTERM_BP_DIRECT	GO:0046601~positive regulation of centriole replication	5	0.194175	0.000908886	ENSG00000213024, ENSG00000151849, ENSG00000123473, ENSG00000142731, ENSG00000156876	2301	5	19308	8.39113	0.995725	0.0619592	0.061071
GOTERM_BP_DIRECT	GO:1905821~positive regulation of chromosome condensation	5	0.194175	0.000908886	ENSG00000136824, ENSG00000109805, ENSG00000010292, ENSG00000113810, ENSG00000121152	2301	5	19308	8.39113	0.995725	0.0619592	0.061071
GOTERM_BP_DIRECT	GO:0000387~spliceosomal snRNP assembly	11	0.427184	0.000969574	ENSG00000130520, ENSG00000139343, ENSG00000125835, ENSG00000143977, ENSG00000167088, ENSG00000179409, ENSG00000125743, ENSG00000100462, ENSG00000182004, ENSG00000121058, ENSG00000124562	2301	28	19308	3.29652	0.99703	0.0638669	0.0629514
GOTERM_BP_DIRECT	GO:0036261~7-methylguanosine cap hypermethylation	6	0.23301	0.000979456	ENSG00000139343, ENSG00000125835, ENSG00000143977, ENSG00000167088, ENSG00000125743, ENSG00000182004	2301	8	19308	6.29335	0.997201	0.0638669	0.0629514
GOTERM_BP_DIRECT	GO:0006267~pre-replicative complex assembly involved in nuclear cell cycle DNA replication	6	0.23301	0.000979456	ENSG00000112118, ENSG00000073111, ENSG00000076003, ENSG00000166508, ENSG00000104738, ENSG00000100297	2301	8	19308	6.29335	0.997201	0.0638669	0.0629514
GOTERM_BP_DIRECT	GO:1905832~positive regulation of spindle assembly	6	0.23301	0.000979456	ENSG00000121957, ENSG00000151849, ENSG00000181085, ENSG00000123473, ENSG00000076382, ENSG00000156876	2301	8	19308	6.29335	0.997201	0.0638669	0.0629514
GOTERM_BP_DIRECT	GO:0006915~apoptotic process	99	3.84466	0.00101839	ENSG00000172113, ENSG00000127946, ENSG00000119408, ENSG00000160255, ENSG00000126453, ENSG00000102882, ENSG00000165304, ENSG00000165948, ENSG00000169230, ENSG00000176720, ENSG00000158796, ENSG00000196954, ENSG00000137752, ENSG00000100219, ENSG00000125538, ENSG00000121858, ENSG00000056558, ENSG00000183762, ENSG00000105185, ENSG00000131746, ENSG00000215788, ENSG00000002330, ENSG00000177425, ENSG0000…	2301	607	19308	1.36857	0.997785	0.0656918	0.0647501
GOTERM_BP_DIRECT	GO:0035556~intracellular signal transduction	77	2.99029	0.00108197	ENSG00000176871, ENSG00000071054, ENSG00000121281, ENSG00000090376, ENSG00000198586, ENSG00000169220, ENSG00000114346, ENSG00000177602, ENSG00000118515, ENSG00000120833, ENSG00000169189, ENSG00000138031, ENSG00000089022, ENSG00000079308, ENSG00000123143, ENSG00000102882, ENSG00000169429, ENSG00000275993, ENSG00000165304, ENSG00000197122, ENSG00000114738, ENSG00000105701, ENSG00000115825, ENSG0000…	2301	451	19308	1.43263	0.998488	0.0690506	0.0680607
GOTERM_BP_DIRECT	GO:0018105~peptidyl-serine phosphorylation	37	1.43689	0.00132727	ENSG00000105613, ENSG00000173020, ENSG00000263528, ENSG00000130758, ENSG00000198586, ENSG00000112742, ENSG00000170312, ENSG00000100749, ENSG00000166851, ENSG00000118515, ENSG00000120539, ENSG00000027075, ENSG00000119408, ENSG00000168078, ENSG00000142208, ENSG00000087586, ENSG00000091436, ENSG00000089022, ENSG00000123143, ENSG00000102882, ENSG00000145632, ENSG00000064393, ENSG00000197122, ENSG0000…	2301	181	19308	1.71531	0.999653	0.0821624	0.0809846
GOTERM_BP_DIRECT	GO:2000736~regulation of stem cell differentiation	9	0.349515	0.00134058	ENSG00000102054, ENSG00000149480, ENSG00000196591, ENSG00000182979, ENSG00000170004, ENSG00000135632, ENSG00000162521, ENSG00000074219, ENSG00000057935	2301	20	19308	3.77601	0.99968	0.0821624	0.0809846
GOTERM_BP_DIRECT	GO:0010165~response to X-ray	9	0.349515	0.00134058	ENSG00000110092, ENSG00000095002, ENSG00000139618, ENSG00000012061, ENSG00000197299, ENSG00000196584, ENSG00000152422, ENSG00000065427, ENSG00000141510	2301	20	19308	3.77601	0.99968	0.0821624	0.0809846
GOTERM_BP_DIRECT	GO:0045995~regulation of embryonic development	14	0.543689	0.00137236	ENSG00000183207, ENSG00000136518, ENSG00000196363, ENSG00000112769, ENSG00000114933, ENSG00000175792, ENSG00000169592, ENSG00000171148, ENSG00000170312, ENSG00000171105, ENSG00000116750, ENSG00000128908, ENSG00000161800, ENSG00000108773	2301	44	19308	2.66991	0.999736	0.0821624	0.0809846
GOTERM_BP_DIRECT	GO:0043066~negative regulation of apoptotic process	87	3.37864	0.00137859	ENSG00000074842, ENSG00000213024, ENSG00000213585, ENSG00000198783, ENSG00000071054, ENSG00000156463, ENSG00000118193, ENSG00000074047, ENSG00000103811, ENSG00000159335, ENSG00000003402, ENSG00000113013, ENSG00000164134, ENSG00000085662, ENSG00000120833, ENSG00000174808, ENSG00000176907, ENSG00000167601, ENSG00000141576, ENSG00000104332, ENSG00000112715, ENSG00000196074, ENSG00000196591, ENSG0000…	2301	526	19308	1.38789	0.999745	0.0821624	0.0809846
GOTERM_BP_DIRECT	GO:1904507~positive regulation of telomere maintenance in response to DNA damage	7	0.271845	0.0013833	ENSG00000116750, ENSG00000136518, ENSG00000183207, ENSG00000128908, ENSG00000114933, ENSG00000175792, ENSG00000169592	2301	12	19308	4.89483	0.999753	0.0821624	0.0809846
GOTERM_BP_DIRECT	GO:0090267~positive regulation of mitotic cell cycle spindle assembly checkpoint	7	0.271845	0.0013833	ENSG00000134690, ENSG00000080986, ENSG00000126215, ENSG00000164109, ENSG00000089685, ENSG00000149503, ENSG00000178999	2301	12	19308	4.89483	0.999753	0.0821624	0.0809846
GOTERM_BP_DIRECT	GO:0048144~fibroblast proliferation	12	0.466019	0.00139832	ENSG00000110958, ENSG00000128342, ENSG00000105974, ENSG00000123975, ENSG00000129173, ENSG00000176046, ENSG00000170312, ENSG00000173207, ENSG00000141510, ENSG00000071626, ENSG00000136104, ENSG00000108773	2301	34	19308	2.96158	0.999774	0.0822402	0.0810612
GOTERM_BP_DIRECT	GO:0007019~microtubule depolymerization	8	0.31068	0.00144964	ENSG00000186185, ENSG00000121621, ENSG00000068796, ENSG00000175216, ENSG00000142945, ENSG00000197457, ENSG00000186638, ENSG00000117632	2301	16	19308	4.19557	0.999834	0.0844308	0.0832204
GOTERM_BP_DIRECT	GO:0032147~activation of protein kinase activity	20	0.776699	0.0016663	ENSG00000112715, ENSG00000114739, ENSG00000071054, ENSG00000118193, ENSG00000110931, ENSG00000114346, ENSG00000136122, ENSG00000167191, ENSG00000170412, ENSG00000171105, ENSG00000141198, ENSG00000161692, ENSG00000088325, ENSG00000101126, ENSG00000149269, ENSG00000120162, ENSG00000103126, ENSG00000204209, ENSG00000092969, ENSG00000141564	2301	78	19308	2.15157	0.999955	0.0961168	0.0947389
GOTERM_BP_DIRECT	GO:0001934~positive regulation of protein phosphorylation	41	1.59223	0.00174961	ENSG00000074842, ENSG00000170271, ENSG00000097007, ENSG00000196126, ENSG00000137486, ENSG00000135842, ENSG00000178999, ENSG00000171105, ENSG00000146648, ENSG00000135362, ENSG00000134690, ENSG00000142208, ENSG00000089685, ENSG00000102882, ENSG00000183856, ENSG00000112715, ENSG00000064393, ENSG00000110931, ENSG00000111328, ENSG00000173511, ENSG00000261371, ENSG00000138685, ENSG00000157368, ENSG0000…	2301	210	19308	1.63827	0.999973	0.0995422	0.0981152
GOTERM_BP_DIRECT	GO:0043524~negative regulation of neuron apoptotic process	33	1.28155	0.00175887	ENSG00000095002, ENSG00000144381, ENSG00000118193, ENSG00000196584, ENSG00000004399, ENSG00000137486, ENSG00000172216, ENSG00000175505, ENSG00000100644, ENSG00000164778, ENSG00000089685, ENSG00000123384, ENSG00000164830, ENSG00000164379, ENSG00000167601, ENSG00000132688, ENSG00000064393, ENSG00000065361, ENSG00000131238, ENSG00000089094, ENSG00000092445, ENSG00000104998, ENSG00000173511, ENSG0000…	2301	158	19308	1.75258	0.999974	0.0995422	0.0981152
GOTERM_BP_DIRECT	GO:0042254~ribosome biogenesis	13	0.504854	0.00179645	ENSG00000101361, ENSG00000105447, ENSG00000132382, ENSG00000112578, ENSG00000082898, ENSG00000134697, ENSG00000135763, ENSG00000167721, ENSG00000113360, ENSG00000087269, ENSG00000143319, ENSG00000100029, ENSG00000100335	2301	40	19308	2.72712	0.999979	0.099786	0.0983555
GOTERM_BP_DIRECT	GO:0006139~nucleobase-containing compound metabolic process	13	0.504854	0.00179645	ENSG00000112759, ENSG00000171793, ENSG00000066379, ENSG00000111335, ENSG00000136877, ENSG00000111331, ENSG00000138363, ENSG00000101911, ENSG00000136492, ENSG00000100632, ENSG00000013573, ENSG00000162433, ENSG00000128951	2301	40	19308	2.72712	0.999979	0.099786	0.0983555
GOTERM_BP_DIRECT	GO:0030071~regulation of mitotic metaphase/anaphase transition	12	0.466019	0.00182246	ENSG00000189079, ENSG00000136518, ENSG00000094880, ENSG00000175063, ENSG00000166851, ENSG00000127616, ENSG00000119408, ENSG00000139613, ENSG00000138778, ENSG00000049618, ENSG00000094804, ENSG00000130024	2301	35	19308	2.87696	0.999982	0.0999415	0.0985088
GOTERM_BP_DIRECT	GO:0065003~macromolecular complex assembly	32	1.24272	0.00183257	ENSG00000042493, ENSG00000132535, ENSG00000134057, ENSG00000137822, ENSG00000171960, ENSG00000158169, ENSG00000170312, ENSG00000123268, ENSG00000184445, ENSG00000090447, ENSG00000015475, ENSG00000102882, ENSG00000074219, ENSG00000141510, ENSG00000100065, ENSG00000136628, ENSG00000158856, ENSG00000131899, ENSG00000176046, ENSG00000112312, ENSG00000115866, ENSG00000134046, ENSG00000075340, ENSG0000…	2301	152	19308	1.76655	0.999983	0.0999415	0.0985088
GOTERM_BP_DIRECT	GO:0006177~GMP biosynthetic process	6	0.23301	0.00198751	ENSG00000138363, ENSG00000106348, ENSG00000159131, ENSG00000128050, ENSG00000178921, ENSG00000163655	2301	9	19308	5.59409	0.999993	0.106456	0.10493
GOTERM_BP_DIRECT	GO:0035825~reciprocal DNA recombination	6	0.23301	0.00198751	ENSG00000163781, ENSG00000138376, ENSG00000136492, ENSG00000020922, ENSG00000101773, ENSG00000012048	2301	9	19308	5.59409	0.999993	0.106456	0.10493
GOTERM_BP_DIRECT	GO:0000165~MAPK cascade	28	1.08738	0.00211139	ENSG00000105974, ENSG00000071054, ENSG00000181085, ENSG00000152689, ENSG00000136997, ENSG00000251322, ENSG00000146648, ENSG00000120896, ENSG00000126934, ENSG00000185650, ENSG00000213281, ENSG00000089022, ENSG00000130829, ENSG00000102882, ENSG00000141753, ENSG00000143772, ENSG00000100263, ENSG00000153064, ENSG00000114738, ENSG00000110931, ENSG00000197442, ENSG00000157168, ENSG00000188130, ENSG0000…	2301	128	19308	1.83556	0.999997	0.112091	0.110484
GOTERM_BP_DIRECT	GO:0045071~negative regulation of viral genome replication	14	0.543689	0.00214309	ENSG00000172183, ENSG00000244509, ENSG00000129351, ENSG00000128394, ENSG00000239713, ENSG00000111335, ENSG00000175334, ENSG00000111331, ENSG00000135114, ENSG00000145901, ENSG00000188313, ENSG00000271503, ENSG00000185885, ENSG00000163565	2301	46	19308	2.55382	0.999997	0.112775	0.111158
GOTERM_BP_DIRECT	GO:0048146~positive regulation of fibroblast proliferation	16	0.621359	0.00221019	ENSG00000128342, ENSG00000105810, ENSG00000077942, ENSG00000097007, ENSG00000134057, ENSG00000253729, ENSG00000115414, ENSG00000136997, ENSG00000135446, ENSG00000136104, ENSG00000146648, ENSG00000174808, ENSG00000101412, ENSG00000145386, ENSG00000124882, ENSG00000094804	2301	57	19308	2.35541	0.999998	0.114431	0.11279
GOTERM_BP_DIRECT	GO:0031573~intra-S DNA damage checkpoint	8	0.31068	0.0022127	ENSG00000114670, ENSG00000095002, ENSG00000075131, ENSG00000020922, ENSG00000154920, ENSG00000183765, ENSG00000144554, ENSG00000172732	2301	17	19308	3.94877	0.999998	0.114431	0.11279
GOTERM_BP_DIRECT	GO:0090307~mitotic spindle assembly	13	0.504854	0.00226851	ENSG00000108424, ENSG00000068796, ENSG00000107949, ENSG00000237649, ENSG00000204899, ENSG00000117399, ENSG00000117650, ENSG00000138160, ENSG00000088325, ENSG00000108055, ENSG00000101972, ENSG00000183765, ENSG00000101057	2301	41	19308	2.6606	0.999999	0.115537	0.11388
GOTERM_BP_DIRECT	GO:0043928~exonucleolytic nuclear-transcribed mRNA catabolic process involved in deadenylation-dependent decay	7	0.271845	0.00231112	ENSG00000123737, ENSG00000120699, ENSG00000077348, ENSG00000130713, ENSG00000172795, ENSG00000110063, ENSG00000141698	2301	13	19308	4.5183	0.999999	0.115537	0.11388
GOTERM_BP_DIRECT	GO:0042659~regulation of cell fate specification	7	0.271845	0.00231112	ENSG00000102054, ENSG00000149480, ENSG00000196591, ENSG00000182979, ENSG00000170004, ENSG00000162521, ENSG00000057935	2301	13	19308	4.5183	0.999999	0.115537	0.11388
GOTERM_BP_DIRECT	GO:0010918~positive regulation of mitochondrial membrane potential	7	0.271845	0.00231112	ENSG00000165283, ENSG00000142208, ENSG00000002330, ENSG00000015475, ENSG00000136997, ENSG00000105221, ENSG00000112992	2301	13	19308	4.5183	0.999999	0.115537	0.11388
GOTERM_BP_DIRECT	GO:0006269~DNA replication, synthesis of RNA primer	5	0.194175	0.00246834	ENSG00000198056, ENSG00000101868, ENSG00000146143, ENSG00000127311, ENSG00000014138	2301	6	19308	6.99261	1	0.120387	0.118661
GOTERM_BP_DIRECT	GO:1902975~mitotic DNA replication initiation	5	0.194175	0.00246834	ENSG00000112118, ENSG00000101868, ENSG00000073111, ENSG00000181938, ENSG00000104738	2301	6	19308	6.99261	1	0.120387	0.118661
GOTERM_BP_DIRECT	GO:0009113~purine nucleobase biosynthetic process	5	0.194175	0.00246834	ENSG00000159131, ENSG00000182199, ENSG00000128050, ENSG00000176974, ENSG00000163655	2301	6	19308	6.99261	1	0.120387	0.118661
GOTERM_BP_DIRECT	GO:0006401~RNA catabolic process	12	0.466019	0.00298422	ENSG00000123737, ENSG00000120699, ENSG00000172183, ENSG00000171824, ENSG00000138035, ENSG00000077348, ENSG00000166938, ENSG00000130713, ENSG00000039123, ENSG00000138668, ENSG00000111335, ENSG00000136104	2301	37	19308	2.72145	1	0.144374	0.142304
GOTERM_BP_DIRECT	GO:0045740~positive regulation of DNA replication	11	0.427184	0.00305166	ENSG00000132646, ENSG00000146648, ENSG00000116161, ENSG00000074047, ENSG00000123268, ENSG00000185104, ENSG00000170312, ENSG00000138346, ENSG00000124882, ENSG00000167513, ENSG00000176208	2301	32	19308	2.88445	1	0.145293	0.14321
GOTERM_BP_DIRECT	GO:0006298~mismatch repair	11	0.427184	0.00305166	ENSG00000174371, ENSG00000132646, ENSG00000095002, ENSG00000077514, ENSG00000116062, ENSG00000097007, ENSG00000117748, ENSG00000132781, ENSG00000106399, ENSG00000136104, ENSG00000105486	2301	32	19308	2.88445	1	0.145293	0.14321
GOTERM_BP_DIRECT	GO:0007595~lactation	14	0.543689	0.00323822	ENSG00000112759, ENSG00000112715, ENSG00000105698, ENSG00000107954, ENSG00000173171, ENSG00000126561, ENSG00000105974, ENSG00000159399, ENSG00000173757, ENSG00000110092, ENSG00000120833, ENSG00000100644, ENSG00000084774, ENSG00000239672	2301	48	19308	2.44741	1	0.152961	0.150769
GOTERM_BP_DIRECT	GO:0007018~microtubule-based movement	21	0.815534	0.00354567	ENSG00000163808, ENSG00000137807, ENSG00000183914, ENSG00000068796, ENSG00000140859, ENSG00000118193, ENSG00000237649, ENSG00000138778, ENSG00000112984, ENSG00000119333, ENSG00000116852, ENSG00000084731, ENSG00000186185, ENSG00000121621, ENSG00000138182, ENSG00000138160, ENSG00000142945, ENSG00000079616, ENSG00000090889, ENSG00000186638, ENSG00000089177	2301	89	19308	1.97993	1	0.164164	0.161811
GOTERM_BP_DIRECT	GO:0006482~protein demethylation	6	0.23301	0.00358622	ENSG00000089094, ENSG00000070495, ENSG00000160993, ENSG00000099364, ENSG00000214517, ENSG00000197724	2301	10	19308	5.03468	1	0.164164	0.161811
GOTERM_BP_DIRECT	GO:0033314~mitotic DNA replication checkpoint	6	0.23301	0.00358622	ENSG00000163781, ENSG00000198783, ENSG00000159593, ENSG00000085840, ENSG00000140534, ENSG00000094804	2301	10	19308	5.03468	1	0.164164	0.161811
GOTERM_BP_DIRECT	GO:0006978~DNA damage response, signal transduction by p53 class mediator resulting in transcription of p21 class mediator	7	0.271845	0.00363957	ENSG00000064393, ENSG00000139618, ENSG00000111206, ENSG00000185499, ENSG00000090447, ENSG00000183765, ENSG00000141510	2301	14	19308	4.19557	1	0.164164	0.161811
GOTERM_BP_DIRECT	GO:0001833~inner cell mass cell proliferation	7	0.271845	0.00363957	ENSG00000139618, ENSG00000101115, ENSG00000083093, ENSG00000146918, ENSG00000149554, ENSG00000101003, ENSG00000147536	2301	14	19308	4.19557	1	0.164164	0.161811
GOTERM_BP_DIRECT	GO:0006287~base-excision repair, gap-filling	7	0.271845	0.00363957	ENSG00000062822, ENSG00000132646, ENSG00000168496, ENSG00000177084, ENSG00000005156, ENSG00000140398, ENSG00000105486	2301	14	19308	4.19557	1	0.164164	0.161811
GOTERM_BP_DIRECT	GO:0006457~protein folding	34	1.32039	0.0037339	ENSG00000213465, ENSG00000183207, ENSG00000090273, ENSG00000240344, ENSG00000144381, ENSG00000004838, ENSG00000155959, ENSG00000133265, ENSG00000166170, ENSG00000171960, ENSG00000197930, ENSG00000137168, ENSG00000153015, ENSG00000004478, ENSG00000113013, ENSG00000168259, ENSG00000138398, ENSG00000120438, ENSG00000125863, ENSG00000156261, ENSG00000141756, ENSG00000090006, ENSG00000143256, ENSG0000…	2301	172	19308	1.65871	1	0.16471	0.162349
GOTERM_BP_DIRECT	GO:0060252~positive regulation of glial cell proliferation	9	0.349515	0.00376151	ENSG00000146648, ENSG00000125538, ENSG00000027075, ENSG00000101412, ENSG00000136244, ENSG00000254087, ENSG00000100300, ENSG00000136997, ENSG00000150630	2301	23	19308	3.28349	1	0.16471	0.162349
GOTERM_BP_DIRECT	GO:0045824~negative regulation of innate immune response	9	0.349515	0.00376151	ENSG00000160703, ENSG00000118503, ENSG00000092445, ENSG00000090376, ENSG00000145220, ENSG00000108771, ENSG00000175334, ENSG00000123609, ENSG00000163565	2301	23	19308	3.28349	1	0.16471	0.162349
GOTERM_BP_DIRECT	GO:0045943~positive regulation of transcription from RNA polymerase I promoter	9	0.349515	0.00376151	ENSG00000005100, ENSG00000128272, ENSG00000145220, ENSG00000132382, ENSG00000163811, ENSG00000165732, ENSG00000115368, ENSG00000009954, ENSG00000124795	2301	23	19308	3.28349	1	0.16471	0.162349
GOTERM_BP_DIRECT	GO:0007131~reciprocal meiotic recombination	11	0.427184	0.00391821	ENSG00000085999, ENSG00000100206, ENSG00000124702, ENSG00000182185, ENSG00000165181, ENSG00000131470, ENSG00000071539, ENSG00000185379, ENSG00000020922, ENSG00000121211, ENSG00000164754	2301	33	19308	2.79704	1	0.169248	0.166822
GOTERM_BP_DIRECT	GO:0006626~protein targeting to mitochondrion	10	0.38835	0.00394763	ENSG00000130204, ENSG00000110711, ENSG00000100216, ENSG00000099800, ENSG00000134809, ENSG00000100300, ENSG00000015475, ENSG00000116688, ENSG00000265354, ENSG00000104980	2301	28	19308	2.99683	1	0.169248	0.166822
GOTERM_BP_DIRECT	GO:0051607~defense response to virus	43	1.6699	0.00394978	ENSG00000244509, ENSG00000128394, ENSG00000239713, ENSG00000263528, ENSG00000111335, ENSG00000132274, ENSG00000136514, ENSG00000111331, ENSG00000136271, ENSG00000164430, ENSG00000092929, ENSG00000168495, ENSG00000184584, ENSG00000164251, ENSG00000163568, ENSG00000161980, ENSG00000084693, ENSG00000163565, ENSG00000185436, ENSG00000172183, ENSG00000129351, ENSG00000077348, ENSG00000109606, ENSG0000…	2301	233	19308	1.54858	1	0.169248	0.166822
GOTERM_BP_DIRECT	GO:0071347~cellular response to interleukin-1	21	0.815534	0.00405926	ENSG00000104332, ENSG00000198053, ENSG00000147274, ENSG00000115009, ENSG00000117228, ENSG00000172216, ENSG00000003436, ENSG00000136997, ENSG00000117226, ENSG00000156711, ENSG00000100644, ENSG00000185386, ENSG00000109320, ENSG00000162645, ENSG00000271503, ENSG00000108691, ENSG00000090339, ENSG00000169429, ENSG00000126368, ENSG00000163874, ENSG00000148677	2301	90	19308	1.95793	1	0.172606	0.170132
GOTERM_BP_DIRECT	GO:0051321~meiotic cell cycle	19	0.737864	0.00408569	ENSG00000174371, ENSG00000179598, ENSG00000154473, ENSG00000196584, ENSG00000156509, ENSG00000111247, ENSG00000137822, ENSG00000020922, ENSG00000138587, ENSG00000117650, ENSG00000085999, ENSG00000100206, ENSG00000108055, ENSG00000126216, ENSG00000101972, ENSG00000101773, ENSG00000143452, ENSG00000127564, ENSG00000123374	2301	78	19308	2.04399	1	0.172606	0.170132
GOTERM_BP_DIRECT	GO:0033209~tumor necrosis factor-mediated signaling pathway	15	0.582524	0.0042509	ENSG00000023445, ENSG00000159958, ENSG00000132507, ENSG00000215788, ENSG00000205542, ENSG00000127191, ENSG00000028137, ENSG00000157873, ENSG00000056972, ENSG00000082512, ENSG00000163568, ENSG00000056558, ENSG00000141527, ENSG00000149600, ENSG00000141510	2301	55	19308	2.28849	1	0.17833	0.175773
GOTERM_BP_DIRECT	GO:0090263~positive regulation of canonical Wnt signaling pathway	24	0.932039	0.00431102	ENSG00000104332, ENSG00000107104, ENSG00000177565, ENSG00000073536, ENSG00000105974, ENSG00000197122, ENSG00000105559, ENSG00000066279, ENSG00000175792, ENSG00000116857, ENSG00000213889, ENSG00000138685, ENSG00000167191, ENSG00000169071, ENSG00000154237, ENSG00000188760, ENSG00000137693, ENSG00000146648, ENSG00000175826, ENSG00000169554, ENSG00000234616, ENSG00000109320, ENSG00000184675, ENSG0000…	2301	109	19308	1.84759	1	0.179596	0.177021
GOTERM_BP_DIRECT	GO:0007064~mitotic sister chromatid cohesion	8	0.31068	0.00462518	ENSG00000117399, ENSG00000121579, ENSG00000146670, ENSG00000108055, ENSG00000136982, ENSG00000164754, ENSG00000177602, ENSG00000121892	2301	19	19308	3.53311	1	0.187934	0.18524
GOTERM_BP_DIRECT	GO:2000042~negative regulation of double-strand break repair via homologous recombination	8	0.31068	0.00462518	ENSG00000160803, ENSG00000181544, ENSG00000164430, ENSG00000116670, ENSG00000080345, ENSG00000051341, ENSG00000175643, ENSG00000127311	2301	19	19308	3.53311	1	0.187934	0.18524
GOTERM_BP_DIRECT	GO:0033044~regulation of chromosome organization	8	0.31068	0.00462518	ENSG00000116750, ENSG00000136518, ENSG00000183207, ENSG00000128908, ENSG00000114933, ENSG00000175792, ENSG00000169592, ENSG00000167513	2301	19	19308	3.53311	1	0.187934	0.18524
GOTERM_BP_DIRECT	GO:0050790~regulation of catalytic activity	63	2.4466	0.00463647	ENSG00000099901, ENSG00000023892, ENSG00000114942, ENSG00000154845, ENSG00000031081, ENSG00000004777, ENSG00000135446, ENSG00000112640, ENSG00000070081, ENSG00000247077, ENSG00000118515, ENSG00000035681, ENSG00000103018, ENSG00000120278, ENSG00000090924, ENSG00000198053, ENSG00000111348, ENSG00000131899, ENSG00000196155, ENSG00000213654, ENSG00000176046, ENSG00000074696, ENSG00000240771, ENSG0000…	2301	375	19308	1.40971	1	0.187934	0.18524
GOTERM_BP_DIRECT	GO:0000132~establishment of mitotic spindle orientation	11	0.427184	0.00496817	ENSG00000115163, ENSG00000166851, ENSG00000072864, ENSG00000121957, ENSG00000040275, ENSG00000080986, ENSG00000107949, ENSG00000136861, ENSG00000164109, ENSG00000147316, ENSG00000186193	2301	34	19308	2.71478	1	0.198694	0.195845
GOTERM_BP_DIRECT	GO:0048568~embryonic organ development	11	0.427184	0.00496817	ENSG00000117597, ENSG00000189079, ENSG00000204304, ENSG00000012061, ENSG00000083093, ENSG00000134046, ENSG00000177084, ENSG00000260027, ENSG00000167081, ENSG00000141510, ENSG00000074219	2301	34	19308	2.71478	1	0.198694	0.195845
GOTERM_BP_DIRECT	GO:0044772~mitotic cell cycle phase transition	9	0.349515	0.00506131	ENSG00000110092, ENSG00000162063, ENSG00000123975, ENSG00000134057, ENSG00000105173, ENSG00000145386, ENSG00000173207, ENSG00000157456, ENSG00000107443	2301	24	19308	3.14668	1	0.199755	0.196892
GOTERM_BP_DIRECT	GO:0051276~chromosome organization	9	0.349515	0.00506131	ENSG00000198783, ENSG00000134690, ENSG00000128708, ENSG00000108055, ENSG00000113810, ENSG00000203760, ENSG00000136997, ENSG00000164611, ENSG00000141510	2301	24	19308	3.14668	1	0.199755	0.196892
GOTERM_BP_DIRECT	GO:0006544~glycine metabolic process	5	0.194175	0.00521625	ENSG00000159131, ENSG00000092621, ENSG00000182199, ENSG00000136877, ENSG00000176974	2301	7	19308	5.99367	1	0.204525	0.201593
GOTERM_BP_DIRECT	GO:0006513~protein monoubiquitination	13	0.504854	0.00526412	ENSG00000181544, ENSG00000221829, ENSG00000070950, ENSG00000107954, ENSG00000158169, ENSG00000077152, ENSG00000110395, ENSG00000055130, ENSG00000115392, ENSG00000187741, ENSG00000169871, ENSG00000107341, ENSG00000143476	2301	45	19308	2.42411	1	0.205062	0.202122
GOTERM_BP_DIRECT	GO:0090305~nucleic acid phosphodiester bond hydrolysis	19	0.737864	0.00542147	ENSG00000105612, ENSG00000042088, ENSG00000139637, ENSG00000005189, ENSG00000154920, ENSG00000138346, ENSG00000176208, ENSG00000001497, ENSG00000172732, ENSG00000198924, ENSG00000062822, ENSG00000118655, ENSG00000169598, ENSG00000188313, ENSG00000168496, ENSG00000177084, ENSG00000101773, ENSG00000125871, ENSG00000203705	2301	80	19308	1.99289	1	0.207321	0.204349
GOTERM_BP_DIRECT	GO:0009615~response to virus	24	0.932039	0.00544466	ENSG00000074800, ENSG00000172183, ENSG00000106367, ENSG00000069399, ENSG00000105323, ENSG00000105810, ENSG00000105855, ENSG00000197122, ENSG00000090376, ENSG00000150753, ENSG00000137965, ENSG00000111335, ENSG00000132274, ENSG00000175334, ENSG00000159128, ENSG00000123609, ENSG00000111331, ENSG00000117632, ENSG00000135114, ENSG00000115221, ENSG00000271503, ENSG00000108771, ENSG00000185885, ENSG0000…	2301	111	19308	1.8143	1	0.207321	0.204349
GOTERM_BP_DIRECT	GO:0051382~kinetochore assembly	7	0.271845	0.00546036	ENSG00000115163, ENSG00000153044, ENSG00000123219, ENSG00000138778, ENSG00000126787, ENSG00000117724, ENSG00000203760	2301	15	19308	3.91586	1	0.207321	0.204349
GOTERM_BP_DIRECT	GO:0000731~DNA synthesis involved in DNA repair	7	0.271845	0.00546036	ENSG00000062822, ENSG00000167325, ENSG00000133119, ENSG00000077514, ENSG00000101868, ENSG00000125319, ENSG00000177084	2301	15	19308	3.91586	1	0.207321	0.204349
GOTERM_BP_DIRECT	GO:0006354~DNA-templated transcription, elongation	29	1.12621	0.00593014	ENSG00000089280, ENSG00000008838, ENSG00000099364, ENSG00000214717, ENSG00000140682, ENSG00000185499, ENSG00000148840, ENSG00000164758, ENSG00000149480, ENSG00000089094, ENSG00000148297, ENSG00000156650, ENSG00000113649, ENSG00000110711, ENSG00000157168, ENSG00000123609, ENSG00000197724, ENSG00000115641, ENSG00000130024, ENSG00000138386, ENSG00000165671, ENSG00000183386, ENSG00000071539, ENSG0000…	2301	144	19308	1.68988	1	0.218436	0.215304
GOTERM_BP_DIRECT	GO:0010389~regulation of G2/M transition of mitotic cell cycle	6	0.23301	0.00593386	ENSG00000147889, ENSG00000118193, ENSG00000087586, ENSG00000117724, ENSG00000123374, ENSG00000136104	2301	11	19308	4.57698	1	0.218436	0.215304
GOTERM_BP_DIRECT	GO:0045786~negative regulation of cell cycle	15	0.582524	0.00598663	ENSG00000073756, ENSG00000108523, ENSG00000105810, ENSG00000176046, ENSG00000112312, ENSG00000020633, ENSG00000188130, ENSG00000138376, ENSG00000101945, ENSG00000123999, ENSG00000180806, ENSG00000128710, ENSG00000012048, ENSG00000122641, ENSG00000167513	2301	57	19308	2.20819	1	0.218436	0.215304
GOTERM_BP_DIRECT	GO:0006406~mRNA export from nucleus	15	0.582524	0.00598663	ENSG00000108559, ENSG00000125450, ENSG00000113569, ENSG00000111581, ENSG00000111196, ENSG00000132661, ENSG00000162385, ENSG00000030066, ENSG00000112081, ENSG00000127922, ENSG00000163634, ENSG00000123136, ENSG00000183684, ENSG00000122566, ENSG00000100296	2301	57	19308	2.20819	1	0.218436	0.215304
GOTERM_BP_DIRECT	GO:0009168~purine ribonucleoside monophosphate biosynthetic process	4	0.15534	0.00615088	ENSG00000196839, ENSG00000159131, ENSG00000178921, ENSG00000163655	2301	4	19308	8.39113	1	0.218436	0.215304
GOTERM_BP_DIRECT	GO:0006272~leading strand elongation	4	0.15534	0.00615088	ENSG00000132646, ENSG00000101868, ENSG00000177084, ENSG00000148229	2301	4	19308	8.39113	1	0.218436	0.215304
GOTERM_BP_DIRECT	GO:1901970~positive regulation of mitotic sister chromatid separation	4	0.15534	0.00615088	ENSG00000134690, ENSG00000089685, ENSG00000149503, ENSG00000178999	2301	4	19308	8.39113	1	0.218436	0.215304
GOTERM_BP_DIRECT	GO:0007057~spindle assembly involved in female meiosis I	4	0.15534	0.00615088	ENSG00000112029, ENSG00000080986, ENSG00000087586, ENSG00000157456	2301	4	19308	8.39113	1	0.218436	0.215304
GOTERM_BP_DIRECT	GO:0045132~meiotic chromosome segregation	4	0.15534	0.00615088	ENSG00000136824, ENSG00000143228, ENSG00000113810, ENSG00000129810	2301	4	19308	8.39113	1	0.218436	0.215304
GOTERM_BP_DIRECT	GO:0006231~dTMP biosynthetic process	4	0.15534	0.00615088	ENSG00000129187, ENSG00000176890, ENSG00000176974, ENSG00000128951	2301	4	19308	8.39113	1	0.218436	0.215304
GOTERM_BP_DIRECT	GO:0007346~regulation of mitotic cell cycle	16	0.621359	0.00616585	ENSG00000094880, ENSG00000112029, ENSG00000198355, ENSG00000112312, ENSG00000153107, ENSG00000136997, ENSG00000173207, ENSG00000141552, ENSG00000117399, ENSG00000142178, ENSG00000166851, ENSG00000123975, ENSG00000119408, ENSG00000126787, ENSG00000089685, ENSG00000106399	2301	63	19308	2.13108	1	0.218436	0.215304
GOTERM_BP_DIRECT	GO:0001933~negative regulation of protein phosphorylation	19	0.737864	0.00621222	ENSG00000158615, ENSG00000198053, ENSG00000162407, ENSG00000077942, ENSG00000105701, ENSG00000134057, ENSG00000253729, ENSG00000137486, ENSG00000135842, ENSG00000112992, ENSG00000156535, ENSG00000144579, ENSG00000100739, ENSG00000135362, ENSG00000168078, ENSG00000254087, ENSG00000146674, ENSG00000183853, ENSG00000163874	2301	81	19308	1.96829	1	0.218436	0.215304
GOTERM_BP_DIRECT	GO:0043044~ATP-dependent chromatin remodeling	11	0.427184	0.00622646	ENSG00000136518, ENSG00000149480, ENSG00000196591, ENSG00000092199, ENSG00000128908, ENSG00000127616, ENSG00000139613, ENSG00000134046, ENSG00000170004, ENSG00000049618, ENSG00000162521	2301	35	19308	2.63721	1	0.218436	0.215304
GOTERM_BP_DIRECT	GO:0006405~RNA export from nucleus	8	0.31068	0.00639381	ENSG00000213024, ENSG00000198088, ENSG00000124789, ENSG00000113569, ENSG00000123136, ENSG00000135486, ENSG00000183684, ENSG00000132661	2301	20	19308	3.35645	1	0.223003	0.219806
GOTERM_BP_DIRECT	GO:0001843~neural tube closure	19	0.737864	0.00709424	ENSG00000106689, ENSG00000108518, ENSG00000048342, ENSG00000097007, ENSG00000081479, ENSG00000100714, ENSG00000138771, ENSG00000138182, ENSG00000183691, ENSG00000172819, ENSG00000101115, ENSG00000011143, ENSG00000184634, ENSG00000168758, ENSG00000123473, ENSG00000074219, ENSG00000092969, ENSG00000120254, ENSG00000108773	2301	82	19308	1.94429	1	0.246002	0.242475
GOTERM_BP_DIRECT	GO:0021987~cerebral cortex development	18	0.699029	0.00719209	ENSG00000076924, ENSG00000075702, ENSG00000106689, ENSG00000072864, ENSG00000130305, ENSG00000118193, ENSG00000066279, ENSG00000134440, ENSG00000002330, ENSG00000110492, ENSG00000138363, ENSG00000013810, ENSG00000159131, ENSG00000100644, ENSG00000125863, ENSG00000123384, ENSG00000147316, ENSG00000168944	2301	76	19308	1.98737	1	0.247962	0.244407
GOTERM_BP_DIRECT	GO:0009952~anterior/posterior pattern specification	21	0.815534	0.00763716	ENSG00000123095, ENSG00000064393, ENSG00000114739, ENSG00000106006, ENSG00000134107, ENSG00000115507, ENSG00000074047, ENSG00000260027, ENSG00000197757, ENSG00000005073, ENSG00000170689, ENSG00000172819, ENSG00000180818, ENSG00000180806, ENSG00000128714, ENSG00000010803, ENSG00000123388, ENSG00000162337, ENSG00000128710, ENSG00000108511, ENSG00000277258	2301	95	19308	1.85488	1	0.261802	0.258049
GOTERM_BP_DIRECT	GO:0060382~regulation of DNA strand elongation	7	0.271845	0.0078668	ENSG00000116750, ENSG00000136518, ENSG00000183207, ENSG00000128908, ENSG00000114933, ENSG00000175792, ENSG00000169592	2301	16	19308	3.67112	1	0.266627	0.262804
GOTERM_BP_DIRECT	GO:0090399~replicative senescence	7	0.271845	0.0078668	ENSG00000147889, ENSG00000012061, ENSG00000164362, ENSG00000149554, ENSG00000183765, ENSG00000141510, ENSG00000153246	2301	16	19308	3.67112	1	0.266627	0.262804
GOTERM_BP_DIRECT	GO:2000045~regulation of G1/S transition of mitotic cell cycle	14	0.543689	0.00802707	ENSG00000071564, ENSG00000136518, ENSG00000123080, ENSG00000118193, ENSG00000139613, ENSG00000049618, ENSG00000130024, ENSG00000189079, ENSG00000110092, ENSG00000147889, ENSG00000128908, ENSG00000127616, ENSG00000101412, ENSG00000015475	2301	53	19308	2.21653	1	0.269952	0.266082
GOTERM_BP_DIRECT	GO:0006979~response to oxidative stress	25	0.970874	0.00805492	ENSG00000111912, ENSG00000073756, ENSG00000113739, ENSG00000105854, ENSG00000012061, ENSG00000131943, ENSG00000097007, ENSG00000169220, ENSG00000197930, ENSG00000100804, ENSG00000204516, ENSG00000147813, ENSG00000168077, ENSG00000103018, ENSG00000142208, ENSG00000164830, ENSG00000110717, ENSG00000141510, ENSG00000136827, ENSG00000159200, ENSG00000175334, ENSG00000065518, ENSG00000167815, ENSG0000…	2301	121	19308	1.73371	1	0.269952	0.266082
GOTERM_BP_DIRECT	GO:0034644~cellular response to UV	15	0.582524	0.00824828	ENSG00000183207, ENSG00000073756, ENSG00000132646, ENSG00000165819, ENSG00000128272, ENSG00000171792, ENSG00000069869, ENSG00000136997, ENSG00000178999, ENSG00000156711, ENSG00000062822, ENSG00000164045, ENSG00000128908, ENSG00000168078, ENSG00000141510	2301	59	19308	2.13334	1	0.274897	0.270956
GOTERM_BP_DIRECT	GO:0007062~sister chromatid cohesion	9	0.349515	0.008657	ENSG00000166851, ENSG00000197771, ENSG00000108055, ENSG00000101972, ENSG00000020922, ENSG00000013573, ENSG00000079616, ENSG00000164754, ENSG00000215021	2301	26	19308	2.90462	1	0.286925	0.282811
GOTERM_BP_DIRECT	GO:0006412~translation	40	1.5534	0.00884851	ENSG00000172172, ENSG00000132313, ENSG00000180992, ENSG00000111639, ENSG00000172053, ENSG00000059691, ENSG00000137547, ENSG00000114686, ENSG00000144029, ENSG00000182180, ENSG00000116221, ENSG00000143436, ENSG00000146648, ENSG00000125445, ENSG00000142208, ENSG00000182223, ENSG00000163923, ENSG00000101210, ENSG00000122140, ENSG00000196531, ENSG00000115866, ENSG00000082515, ENSG00000116898, ENSG0000…	2301	223	19308	1.50514	1	0.29166	0.287479
GOTERM_BP_DIRECT	GO:0016572~histone phosphorylation	6	0.23301	0.00918427	ENSG00000114670, ENSG00000145386, ENSG00000123374, ENSG00000149503, ENSG00000009954, ENSG00000162302	2301	12	19308	4.19557	1	0.296905	0.292648
GOTERM_BP_DIRECT	GO:0090656~t-circle formation	6	0.23301	0.00918427	ENSG00000174371, ENSG00000138375, ENSG00000012061, ENSG00000197299, ENSG00000126215, ENSG00000138346	2301	12	19308	4.19557	1	0.296905	0.292648
GOTERM_BP_DIRECT	GO:0043484~regulation of RNA splicing	18	0.699029	0.00938552	ENSG00000135801, ENSG00000089280, ENSG00000105227, ENSG00000096746, ENSG00000104413, ENSG00000183808, ENSG00000104824, ENSG00000135486, ENSG00000152601, ENSG00000189091, ENSG00000117569, ENSG00000076770, ENSG00000171148, ENSG00000244462, ENSG00000188529, ENSG00000101574, ENSG00000169813, ENSG00000108773	2301	78	19308	1.93642	1	0.296905	0.292648
GOTERM_BP_DIRECT	GO:0044208~'de novo' AMP biosynthetic process	5	0.194175	0.00945304	ENSG00000035687, ENSG00000138363, ENSG00000159131, ENSG00000128050, ENSG00000178921	2301	8	19308	5.24446	1	0.296905	0.292648
GOTERM_BP_DIRECT	GO:0007093~mitotic cell cycle checkpoint	5	0.194175	0.00945304	ENSG00000169679, ENSG00000122952, ENSG00000156970, ENSG00000174442, ENSG00000139579	2301	8	19308	5.24446	1	0.296905	0.292648
GOTERM_BP_DIRECT	GO:0006975~DNA damage induced protein phosphorylation	5	0.194175	0.00945304	ENSG00000188130, ENSG00000097007, ENSG00000149554, ENSG00000183765, ENSG00000102882	2301	8	19308	5.24446	1	0.296905	0.292648
GOTERM_BP_DIRECT	GO:0051988~regulation of attachment of spindle microtubules to kinetochore	5	0.194175	0.00945304	ENSG00000117650, ENSG00000114346, ENSG00000128944, ENSG00000161800, ENSG00000076382	2301	8	19308	5.24446	1	0.296905	0.292648
GOTERM_BP_DIRECT	GO:0045143~homologous chromosome segregation	5	0.194175	0.00945304	ENSG00000166851, ENSG00000135476, ENSG00000163535, ENSG00000129810, ENSG00000164611	2301	8	19308	5.24446	1	0.296905	0.292648
GOTERM_BP_DIRECT	GO:0045839~negative regulation of mitotic nuclear division	5	0.194175	0.00945304	ENSG00000141198, ENSG00000172113, ENSG00000149554, ENSG00000172167, ENSG00000175756	2301	8	19308	5.24446	1	0.296905	0.292648
GOTERM_BP_DIRECT	GO:0097067~cellular response to thyroid hormone stimulus	7	0.271845	0.0109509	ENSG00000163131, ENSG00000119138, ENSG00000185340, ENSG00000103811, ENSG00000112983, ENSG00000135047, ENSG00000135363	2301	17	19308	3.45517	1	0.33863	0.333775
GOTERM_BP_DIRECT	GO:1904355~positive regulation of telomere capping	7	0.271845	0.0109509	ENSG00000117650, ENSG00000138668, ENSG00000181085, ENSG00000089022, ENSG00000102882, ENSG00000178999, ENSG00000139579	2301	17	19308	3.45517	1	0.33863	0.333775
GOTERM_BP_DIRECT	GO:0008637~apoptotic mitochondrial changes	7	0.271845	0.0109509	ENSG00000147889, ENSG00000144381, ENSG00000159399, ENSG00000142208, ENSG00000015475, ENSG00000023228, ENSG00000108179	2301	17	19308	3.45517	1	0.33863	0.333775
GOTERM_BP_DIRECT	GO:0006397~mRNA processing	39	1.51456	0.0117548	ENSG00000198783, ENSG00000198860, ENSG00000165819, ENSG00000104824, ENSG00000135486, ENSG00000152601, ENSG00000139746, ENSG00000110063, ENSG00000112183, ENSG00000167005, ENSG00000125944, ENSG00000185650, ENSG00000167088, ENSG00000108561, ENSG00000125743, ENSG00000183431, ENSG00000141994, ENSG00000108883, ENSG00000104897, ENSG00000104413, ENSG00000113649, ENSG00000070495, ENSG00000109606, ENSG0000…	2301	220	19308	1.48752	1	0.361626	0.356441
GOTERM_BP_DIRECT	GO:0001649~osteoblast differentiation	25	0.970874	0.012001	ENSG00000092199, ENSG00000147274, ENSG00000074047, ENSG00000167460, ENSG00000107937, ENSG00000067955, ENSG00000041982, ENSG00000138696, ENSG00000196305, ENSG00000183691, ENSG00000124813, ENSG00000142208, ENSG00000104332, ENSG00000105202, ENSG00000019186, ENSG00000132382, ENSG00000204681, ENSG00000138685, ENSG00000115541, ENSG00000115641, ENSG00000113083, ENSG00000185386, ENSG00000183684, ENSG0000…	2301	125	19308	1.67823	1	0.367316	0.36205
GOTERM_BP_DIRECT	GO:0008584~male gonad development	23	0.893204	0.0121356	ENSG00000104332, ENSG00000095002, ENSG00000012061, ENSG00000176046, ENSG00000066279, ENSG00000081479, ENSG00000111676, ENSG00000132780, ENSG00000176720, ENSG00000134698, ENSG00000110395, ENSG00000134245, ENSG00000171105, ENSG00000167325, ENSG00000005073, ENSG00000164342, ENSG00000121858, ENSG00000125977, ENSG00000187741, ENSG00000123999, ENSG00000164104, ENSG00000122641, ENSG00000092969	2301	112	19308	1.72318	1	0.36955	0.364252
GOTERM_BP_DIRECT	GO:0031571~mitotic G1 DNA damage checkpoint	6	0.23301	0.01348	ENSG00000110092, ENSG00000168411, ENSG00000117748, ENSG00000253729, ENSG00000123374, ENSG00000141510	2301	13	19308	3.87283	1	0.408416	0.402561
GOTERM_BP_DIRECT	GO:0008284~positive regulation of cell proliferation	84	3.26214	0.0137414	ENSG00000103495, ENSG00000118193, ENSG00000105835, ENSG00000171262, ENSG00000197696, ENSG00000103811, ENSG00000075131, ENSG00000198901, ENSG00000175505, ENSG00000135446, ENSG00000058085, ENSG00000171105, ENSG00000166197, ENSG00000082512, ENSG00000174808, ENSG00000104332, ENSG00000112715, ENSG00000196591, ENSG00000138685, ENSG00000186193, ENSG00000150630, ENSG00000142453, ENSG00000100219, ENSG0000…	2301	550	19308	1.28156	1	0.410094	0.404215
GOTERM_BP_DIRECT	GO:1905168~positive regulation of double-strand break repair via homologous recombination	11	0.427184	0.0138723	ENSG00000189079, ENSG00000136518, ENSG00000183207, ENSG00000181544, ENSG00000089280, ENSG00000175792, ENSG00000112983, ENSG00000127337, ENSG00000111247, ENSG00000101773, ENSG00000101189	2301	39	19308	2.36673	1	0.410094	0.404215
GOTERM_BP_DIRECT	GO:1903936~cellular response to sodium arsenite	4	0.15534	0.0140139	ENSG00000135486, ENSG00000204209, ENSG00000163874, ENSG00000156711	2301	5	19308	6.71291	1	0.410094	0.404215
GOTERM_BP_DIRECT	GO:1903490~positive regulation of mitotic cytokinesis	4	0.15534	0.0140139	ENSG00000134690, ENSG00000089685, ENSG00000149503, ENSG00000178999	2301	5	19308	6.71291	1	0.410094	0.404215
GOTERM_BP_DIRECT	GO:0051882~mitochondrial depolarization	4	0.15534	0.0140139	ENSG00000147889, ENSG00000097007, ENSG00000130770, ENSG00000137752	2301	5	19308	6.71291	1	0.410094	0.404215
GOTERM_BP_DIRECT	GO:0018057~peptidyl-lysine oxidation	4	0.15534	0.0140139	ENSG00000138131, ENSG00000115318, ENSG00000113083, ENSG00000129038	2301	5	19308	6.71291	1	0.410094	0.404215
GOTERM_BP_DIRECT	GO:0045578~negative regulation of B cell differentiation	4	0.15534	0.0140139	ENSG00000104332, ENSG00000029993, ENSG00000123999, ENSG00000122641	2301	5	19308	6.71291	1	0.410094	0.404215
GOTERM_BP_DIRECT	GO:0046777~protein autophosphorylation	33	1.28155	0.014213	ENSG00000090376, ENSG00000130758, ENSG00000097007, ENSG00000181085, ENSG00000112742, ENSG00000178999, ENSG00000171105, ENSG00000100749, ENSG00000117650, ENSG00000146648, ENSG00000119408, ENSG00000084774, ENSG00000142208, ENSG00000087586, ENSG00000101213, ENSG00000103653, ENSG00000089022, ENSG00000165304, ENSG00000197122, ENSG00000114738, ENSG00000092445, ENSG00000110931, ENSG00000198355, ENSG0000…	2301	181	19308	1.52988	1	0.413901	0.407967
GOTERM_BP_DIRECT	GO:0010212~response to ionizing radiation	12	0.466019	0.0145341	ENSG00000167325, ENSG00000163781, ENSG00000168411, ENSG00000085999, ENSG00000182979, ENSG00000088305, ENSG00000140534, ENSG00000105393, ENSG00000157212, ENSG00000090339, ENSG00000012048, ENSG00000139579	2301	45	19308	2.23764	1	0.421209	0.41517
GOTERM_BP_DIRECT	GO:0032981~mitochondrial respiratory chain complex I assembly	15	0.582524	0.0147595	ENSG00000130159, ENSG00000151413, ENSG00000099795, ENSG00000074582, ENSG00000110074, ENSG00000171202, ENSG00000023228, ENSG00000213619, ENSG00000065518, ENSG00000109390, ENSG00000168653, ENSG00000139180, ENSG00000156170, ENSG00000110717, ENSG00000125356	2301	63	19308	1.99789	1	0.422797	0.416736
GOTERM_BP_DIRECT	GO:0045190~isotype switching	7	0.271845	0.0148004	ENSG00000174371, ENSG00000162929, ENSG00000095002, ENSG00000012061, ENSG00000076248, ENSG00000116062, ENSG00000176208	2301	18	19308	3.26322	1	0.422797	0.416736
GOTERM_BP_DIRECT	GO:0007250~activation of NF-kappaB-inducing kinase activity	7	0.271845	0.0148004	ENSG00000164342, ENSG00000172175, ENSG00000186660, ENSG00000141527, ENSG00000127191, ENSG00000184216, ENSG00000100065	2301	18	19308	3.26322	1	0.422797	0.416736
GOTERM_BP_DIRECT	GO:0048478~replication fork protection	5	0.194175	0.0154255	ENSG00000138375, ENSG00000198783, ENSG00000139618, ENSG00000197299, ENSG00000075131	2301	9	19308	4.66174	1	0.434448	0.42822
GOTERM_BP_DIRECT	GO:0045063~T-helper 1 cell differentiation	5	0.194175	0.0154255	ENSG00000130038, ENSG00000077238, ENSG00000115604, ENSG00000006042, ENSG00000189403	2301	9	19308	4.66174	1	0.434448	0.42822
GOTERM_BP_DIRECT	GO:0051292~nuclear pore complex assembly	5	0.194175	0.0154255	ENSG00000124789, ENSG00000155561, ENSG00000102900, ENSG00000111581, ENSG00000058804	2301	9	19308	4.66174	1	0.434448	0.42822
GOTERM_BP_DIRECT	GO:0051973~positive regulation of telomerase activity	10	0.38835	0.015554	ENSG00000117650, ENSG00000110958, ENSG00000079246, ENSG00000120438, ENSG00000130826, ENSG00000181085, ENSG00000089022, ENSG00000136997, ENSG00000102882, ENSG00000178999	2301	34	19308	2.46798	1	0.436021	0.429771
GOTERM_BP_DIRECT	GO:0016573~histone acetylation	16	0.621359	0.0164547	ENSG00000183207, ENSG00000136518, ENSG00000135801, ENSG00000156650, ENSG00000008838, ENSG00000175792, ENSG00000112983, ENSG00000130382, ENSG00000134852, ENSG00000171148, ENSG00000137486, ENSG00000121579, ENSG00000127337, ENSG00000101189, ENSG00000277258, ENSG00000108773	2301	70	19308	1.91797	1	0.459125	0.452543
GOTERM_BP_DIRECT	GO:1990830~cellular response to leukemia inhibitory factor	21	0.815534	0.0165498	ENSG00000067057, ENSG00000116649, ENSG00000159399, ENSG00000137547, ENSG00000120837, ENSG00000176974, ENSG00000064932, ENSG00000150630, ENSG00000163002, ENSG00000079246, ENSG00000080345, ENSG00000172819, ENSG00000158186, ENSG00000116161, ENSG00000119969, ENSG00000121207, ENSG00000112081, ENSG00000184489, ENSG00000100321, ENSG00000090339, ENSG00000101057	2301	102	19308	1.72759	1	0.459639	0.45305
GOTERM_BP_DIRECT	GO:0010332~response to gamma radiation	9	0.349515	0.0172154	ENSG00000112096, ENSG00000139618, ENSG00000196584, ENSG00000115008, ENSG00000253729, ENSG00000136997, ENSG00000144554, ENSG00000110395, ENSG00000141510	2301	29	19308	2.60415	1	0.475922	0.469099
GOTERM_BP_DIRECT	GO:0032869~cellular response to insulin stimulus	22	0.854369	0.0172949	ENSG00000136628, ENSG00000197122, ENSG00000175567, ENSG00000253729, ENSG00000136997, ENSG00000132793, ENSG00000003402, ENSG00000135446, ENSG00000171105, ENSG00000143545, ENSG00000079385, ENSG00000100219, ENSG00000185591, ENSG00000100889, ENSG00000169047, ENSG00000185650, ENSG00000120053, ENSG00000149269, ENSG00000142208, ENSG00000101255, ENSG00000166986, ENSG00000105221	2301	109	19308	1.69362	1	0.475927	0.469104
GOTERM_BP_DIRECT	GO:0009410~response to xenobiotic stimulus	41	1.59223	0.0174906	ENSG00000073756, ENSG00000176890, ENSG00000097007, ENSG00000002330, ENSG00000170312, ENSG00000136997, ENSG00000135446, ENSG00000073050, ENSG00000140263, ENSG00000079246, ENSG00000083720, ENSG00000100300, ENSG00000107331, ENSG00000092969, ENSG00000100263, ENSG00000104332, ENSG00000196591, ENSG00000197122, ENSG00000104899, ENSG00000076555, ENSG00000171793, ENSG00000169692, ENSG00000117724, ENSG0000…	2301	240	19308	1.43349	1	0.479114	0.472245
GOTERM_BP_DIRECT	GO:0051056~regulation of small GTPase mediated signal transduction	23	0.893204	0.0179411	ENSG00000107863, ENSG00000132359, ENSG00000023892, ENSG00000076864, ENSG00000196155, ENSG00000171680, ENSG00000066248, ENSG00000153404, ENSG00000114346, ENSG00000031081, ENSG00000240771, ENSG00000159842, ENSG00000198826, ENSG00000154358, ENSG00000116584, ENSG00000165801, ENSG00000102302, ENSG00000213390, ENSG00000161800, ENSG00000076928, ENSG00000120278, ENSG00000142632, ENSG00000186635	2301	116	19308	1.66376	1	0.48922	0.482207
GOTERM_BP_DIRECT	GO:0048025~negative regulation of mRNA splicing, via spliceosome	8	0.31068	0.0186594	ENSG00000126254, ENSG00000090097, ENSG00000147274, ENSG00000108561, ENSG00000104824, ENSG00000182872, ENSG00000188529, ENSG00000122566	2301	24	19308	2.79704	1	0.502931	0.495721
GOTERM_BP_DIRECT	GO:0031297~replication fork processing	10	0.38835	0.0187828	ENSG00000138375, ENSG00000132646, ENSG00000168411, ENSG00000160949, ENSG00000197299, ENSG00000146263, ENSG00000183684, ENSG00000013573, ENSG00000154920, ENSG00000172732	2301	35	19308	2.39747	1	0.502931	0.495721
GOTERM_BP_DIRECT	GO:0060394~negative regulation of pathway-restricted SMAD protein phosphorylation	6	0.23301	0.0189469	ENSG00000107984, ENSG00000100219, ENSG00000183691, ENSG00000124225, ENSG00000123384, ENSG00000106991	2301	14	19308	3.5962	1	0.502931	0.495721
GOTERM_BP_DIRECT	GO:0035563~positive regulation of chromatin binding	6	0.23301	0.0189469	ENSG00000157657, ENSG00000112312, ENSG00000134046, ENSG00000013573, ENSG00000186280, ENSG00000167513	2301	14	19308	3.5962	1	0.502931	0.495721
GOTERM_BP_DIRECT	GO:1900025~negative regulation of substrate adhesion-dependent cell spreading	6	0.23301	0.0189469	ENSG00000158856, ENSG00000107104, ENSG00000077942, ENSG00000163975, ENSG00000179051, ENSG00000117228	2301	14	19308	3.5962	1	0.502931	0.495721
GOTERM_BP_DIRECT	GO:0060707~trophoblast giant cell differentiation	6	0.23301	0.0189469	ENSG00000128342, ENSG00000129173, ENSG00000165891, ENSG00000112559, ENSG00000057657, ENSG00000142731	2301	14	19308	3.5962	1	0.502931	0.495721
GOTERM_BP_DIRECT	GO:0050729~positive regulation of inflammatory response	22	0.854369	0.0190496	ENSG00000144381, ENSG00000213654, ENSG00000110492, ENSG00000134852, ENSG00000130164, ENSG00000123609, ENSG00000167191, ENSG00000172216, ENSG00000196954, ENSG00000173757, ENSG00000137752, ENSG00000111199, ENSG00000156711, ENSG00000198959, ENSG00000164342, ENSG00000188372, ENSG00000145901, ENSG00000146648, ENSG00000125538, ENSG00000085871, ENSG00000163568, ENSG00000100097	2301	110	19308	1.67823	1	0.503429	0.496211
GOTERM_BP_DIRECT	GO:0044818~mitotic G2/M transition checkpoint	7	0.271845	0.0194966	ENSG00000138376, ENSG00000149554, ENSG00000105393, ENSG00000020922, ENSG00000101773, ENSG00000012048, ENSG00000139579	2301	19	19308	3.09147	1	0.508523	0.501233
GOTERM_BP_DIRECT	GO:0008156~negative regulation of DNA replication	7	0.271845	0.0194966	ENSG00000125482, ENSG00000112312, ENSG00000107937, ENSG00000163191, ENSG00000141510, ENSG00000094804, ENSG00000121892	2301	19	19308	3.09147	1	0.508523	0.501233
GOTERM_BP_DIRECT	GO:0045945~positive regulation of transcription from RNA polymerase III promoter	7	0.271845	0.0194966	ENSG00000128915, ENSG00000132382, ENSG00000165732, ENSG00000122641, ENSG00000141564, ENSG00000009954, ENSG00000124795	2301	19	19308	3.09147	1	0.508523	0.501233
GOTERM_BP_DIRECT	GO:0007498~mesoderm development	9	0.349515	0.0210881	ENSG00000112715, ENSG00000106689, ENSG00000114739, ENSG00000161405, ENSG00000175826, ENSG00000083093, ENSG00000177508, ENSG00000149922, ENSG00000157557	2301	30	19308	2.51734	1	0.54295	0.535166
GOTERM_BP_DIRECT	GO:2000773~negative regulation of cellular senescence	9	0.349515	0.0210881	ENSG00000080839, ENSG00000105810, ENSG00000112029, ENSG00000105835, ENSG00000164362, ENSG00000097007, ENSG00000253729, ENSG00000126453, ENSG00000145632	2301	30	19308	2.51734	1	0.54295	0.535166
GOTERM_BP_DIRECT	GO:0045840~positive regulation of mitotic nuclear division	9	0.349515	0.0210881	ENSG00000213024, ENSG00000125538, ENSG00000137804, ENSG00000174808, ENSG00000115008, ENSG00000162337, ENSG00000087586, ENSG00000124882, ENSG00000171105	2301	30	19308	2.51734	1	0.54295	0.535166
GOTERM_BP_DIRECT	GO:0046330~positive regulation of JNK cascade	20	0.776699	0.0214085	ENSG00000064393, ENSG00000130038, ENSG00000156463, ENSG00000197442, ENSG00000130758, ENSG00000115008, ENSG00000150764, ENSG00000111321, ENSG00000127191, ENSG00000111199, ENSG00000204305, ENSG00000164342, ENSG00000125538, ENSG00000082512, ENSG00000164251, ENSG00000056558, ENSG00000189403, ENSG00000103126, ENSG00000106100, ENSG00000111907	2301	98	19308	1.71248	1	0.548844	0.540976
GOTERM_BP_DIRECT	GO:0090503~RNA phosphodiester bond hydrolysis, exonucleolytic	10	0.38835	0.0224707	ENSG00000172183, ENSG00000138035, ENSG00000077348, ENSG00000166938, ENSG00000143319, ENSG00000172795, ENSG00000125107, ENSG00000110063, ENSG00000163874, ENSG00000132773	2301	36	19308	2.33087	1	0.564071	0.555984
GOTERM_BP_DIRECT	GO:0007095~mitotic G2 DNA damage checkpoint	10	0.38835	0.0224707	ENSG00000163781, ENSG00000166851, ENSG00000197299, ENSG00000149554, ENSG00000140534, ENSG00000105393, ENSG00000020922, ENSG00000170312, ENSG00000012048, ENSG00000143476	2301	36	19308	2.33087	1	0.564071	0.555984
GOTERM_BP_DIRECT	GO:0007254~JNK cascade	14	0.543689	0.0224791	ENSG00000197442, ENSG00000130758, ENSG00000074696, ENSG00000169071, ENSG00000170425, ENSG00000164342, ENSG00000125538, ENSG00000109320, ENSG00000125731, ENSG00000091436, ENSG00000184216, ENSG00000106100, ENSG00000130829, ENSG00000204209	2301	60	19308	1.95793	1	0.564071	0.555984
GOTERM_BP_DIRECT	GO:0001558~regulation of cell growth	17	0.660194	0.0225811	ENSG00000107821, ENSG00000118193, ENSG00000111206, ENSG00000197785, ENSG00000077684, ENSG00000041982, ENSG00000137692, ENSG00000079385, ENSG00000100219, ENSG00000116670, ENSG00000118515, ENSG00000120833, ENSG00000109084, ENSG00000090006, ENSG00000146674, ENSG00000141753, ENSG00000141564	2301	79	19308	1.80569	1	0.564071	0.555984
GOTERM_BP_DIRECT	GO:0042149~cellular response to glucose starvation	13	0.504854	0.0229793	ENSG00000106638, ENSG00000128272, ENSG00000135486, ENSG00000132382, ENSG00000074590, ENSG00000142178, ENSG00000100219, ENSG00000101945, ENSG00000163565, ENSG00000275993, ENSG00000163874, ENSG00000141510, ENSG00000163545	2301	54	19308	2.02009	1	0.564071	0.555984
GOTERM_BP_DIRECT	GO:0010907~positive regulation of glucose metabolic process	5	0.194175	0.0233183	ENSG00000158715, ENSG00000169047, ENSG00000197122, ENSG00000142208, ENSG00000105221	2301	10	19308	4.19557	1	0.564071	0.555984
GOTERM_BP_DIRECT	GO:0032060~bleb assembly	5	0.194175	0.0233183	ENSG00000198121, ENSG00000065534, ENSG00000109099, ENSG00000142227, ENSG00000134531	2301	10	19308	4.19557	1	0.564071	0.555984
GOTERM_BP_DIRECT	GO:1904851~positive regulation of establishment of protein localization to telomere	5	0.194175	0.0233183	ENSG00000120438, ENSG00000150753, ENSG00000156261, ENSG00000130826, ENSG00000146731	2301	10	19308	4.19557	1	0.564071	0.555984
GOTERM_BP_DIRECT	GO:0035999~tetrahydrofolate interconversion	5	0.194175	0.0233183	ENSG00000100714, ENSG00000176890, ENSG00000182199, ENSG00000176974, ENSG00000120254	2301	10	19308	4.19557	1	0.564071	0.555984
GOTERM_BP_DIRECT	GO:0033598~mammary gland epithelial cell proliferation	5	0.194175	0.0233183	ENSG00000110092, ENSG00000183856, ENSG00000172216, ENSG00000215021, ENSG00000166888	2301	10	19308	4.19557	1	0.564071	0.555984
GOTERM_BP_DIRECT	GO:0000076~DNA replication checkpoint	5	0.194175	0.0233183	ENSG00000075131, ENSG00000093009, ENSG00000138346, ENSG00000167513, ENSG00000094804	2301	10	19308	4.19557	1	0.564071	0.555984
GOTERM_BP_DIRECT	GO:0006264~mitochondrial DNA replication	5	0.194175	0.0233183	ENSG00000167325, ENSG00000106028, ENSG00000107815, ENSG00000125871, ENSG00000138346	2301	10	19308	4.19557	1	0.564071	0.555984
GOTERM_BP_DIRECT	GO:0046599~regulation of centriole replication	5	0.194175	0.0233183	ENSG00000101624, ENSG00000151849, ENSG00000116127, ENSG00000123473, ENSG00000145632	2301	10	19308	4.19557	1	0.564071	0.555984
GOTERM_BP_DIRECT	GO:0006400~tRNA modification	8	0.31068	0.0233188	ENSG00000160193, ENSG00000170291, ENSG00000213339, ENSG00000068438, ENSG00000104907, ENSG00000165118, ENSG00000151576, ENSG00000165832	2301	25	19308	2.68516	1	0.564071	0.555984
GOTERM_BP_DIRECT	GO:0006417~regulation of translation	18	0.699029	0.0239195	ENSG00000170291, ENSG00000107954, ENSG00000176890, ENSG00000129460, ENSG00000112531, ENSG00000153944, ENSG00000162385, ENSG00000170515, ENSG00000166197, ENSG00000164163, ENSG00000070814, ENSG00000142208, ENSG00000125107, ENSG00000089022, ENSG00000089154, ENSG00000144895, ENSG00000141994, ENSG00000105221	2301	86	19308	1.75628	1	0.576279	0.568017
GOTERM_BP_DIRECT	GO:0051384~response to glucocorticoid	15	0.582524	0.0246417	ENSG00000108602, ENSG00000090470, ENSG00000073756, ENSG00000144381, ENSG00000176890, ENSG00000136244, ENSG00000002330, ENSG00000110492, ENSG00000136943, ENSG00000150540, ENSG00000138772, ENSG00000120053, ENSG00000109321, ENSG00000189403, ENSG00000182752	2301	67	19308	1.87861	1	0.57938	0.571075
GOTERM_BP_DIRECT	GO:0007007~inner mitochondrial membrane organization	7	0.271845	0.0251121	ENSG00000173171, ENSG00000100347, ENSG00000177034, ENSG00000159685, ENSG00000136997, ENSG00000162972, ENSG00000113013	2301	20	19308	2.9369	1	0.57938	0.571075
GOTERM_BP_DIRECT	GO:0007100~mitotic centrosome separation	4	0.15534	0.0255594	ENSG00000072864, ENSG00000213024, ENSG00000138160, ENSG00000087586	2301	6	19308	5.59409	1	0.57938	0.571075
GOTERM_BP_DIRECT	GO:0070200~establishment of protein localization to telomere	4	0.15534	0.0255594	ENSG00000139618, ENSG00000164362, ENSG00000151612, ENSG00000139579	2301	6	19308	5.59409	1	0.57938	0.571075
GOTERM_BP_DIRECT	GO:1990918~double-strand break repair involved in meiotic recombination	4	0.15534	0.0255594	ENSG00000132016, ENSG00000160207, ENSG00000136492, ENSG00000144554	2301	6	19308	5.59409	1	0.57938	0.571075
GOTERM_BP_DIRECT	GO:0006189~'de novo' IMP biosynthetic process	4	0.15534	0.0255594	ENSG00000138363, ENSG00000159131, ENSG00000128050, ENSG00000178921	2301	6	19308	5.59409	1	0.57938	0.571075
GOTERM_BP_DIRECT	GO:0019346~transsulfuration	4	0.15534	0.0255594	ENSG00000100714, ENSG00000274276, ENSG00000128309, ENSG00000160200	2301	6	19308	5.59409	1	0.57938	0.571075
GOTERM_BP_DIRECT	GO:0031536~positive regulation of exit from mitosis	4	0.15534	0.0255594	ENSG00000175063, ENSG00000146670, ENSG00000089685, ENSG00000215021	2301	6	19308	5.59409	1	0.57938	0.571075
GOTERM_BP_DIRECT	GO:0000054~ribosomal subunit export from nucleus	4	0.15534	0.0255594	ENSG00000164163, ENSG00000132341, ENSG00000082898, ENSG00000242372	2301	6	19308	5.59409	1	0.57938	0.571075
GOTERM_BP_DIRECT	GO:0010571~positive regulation of nuclear cell cycle DNA replication	4	0.15534	0.0255594	ENSG00000128908, ENSG00000161692, ENSG00000006634, ENSG00000011451	2301	6	19308	5.59409	1	0.57938	0.571075
GOTERM_BP_DIRECT	GO:0021587~cerebellum morphogenesis	4	0.15534	0.0255594	ENSG00000274276, ENSG00000097007, ENSG00000160200, ENSG00000073050	2301	6	19308	5.59409	1	0.57938	0.571075
GOTERM_BP_DIRECT	GO:1902751~positive regulation of cell cycle G2/M phase transition	4	0.15534	0.0255594	ENSG00000164045, ENSG00000101224, ENSG00000158402, ENSG00000176208	2301	6	19308	5.59409	1	0.57938	0.571075
GOTERM_BP_DIRECT	GO:0006565~L-serine catabolic process	4	0.15534	0.0255594	ENSG00000274276, ENSG00000182199, ENSG00000160200, ENSG00000176974	2301	6	19308	5.59409	1	0.57938	0.571075
GOTERM_BP_DIRECT	GO:0045589~regulation of regulatory T cell differentiation	4	0.15534	0.0255594	ENSG00000113360, ENSG00000187741, ENSG00000144554, ENSG00000108773	2301	6	19308	5.59409	1	0.57938	0.571075
GOTERM_BP_DIRECT	GO:0043504~mitochondrial DNA repair	4	0.15534	0.0255594	ENSG00000005156, ENSG00000125871, ENSG00000138346, ENSG00000141510	2301	6	19308	5.59409	1	0.57938	0.571075
GOTERM_BP_DIRECT	GO:0006164~purine nucleotide biosynthetic process	6	0.23301	0.0256901	ENSG00000138363, ENSG00000100714, ENSG00000159131, ENSG00000101911, ENSG00000165704, ENSG00000178921	2301	15	19308	3.35645	1	0.57938	0.571075
GOTERM_BP_DIRECT	GO:0043486~histone exchange	6	0.23301	0.0256901	ENSG00000136518, ENSG00000183207, ENSG00000143401, ENSG00000175792, ENSG00000127337, ENSG00000132780	2301	15	19308	3.35645	1	0.57938	0.571075
GOTERM_BP_DIRECT	GO:0042733~embryonic digit morphogenesis	13	0.504854	0.0263072	ENSG00000196591, ENSG00000179029, ENSG00000074047, ENSG00000205084, ENSG00000169071, ENSG00000164066, ENSG00000005073, ENSG00000183691, ENSG00000128714, ENSG00000123388, ENSG00000162337, ENSG00000091436, ENSG00000011143	2301	55	19308	1.98336	1	0.586679	0.578269
GOTERM_BP_DIRECT	GO:0070371~ERK1 and ERK2 cascade	13	0.504854	0.0263072	ENSG00000183856, ENSG00000103811, ENSG00000097007, ENSG00000138685, ENSG00000170312, ENSG00000136997, ENSG00000065427, ENSG00000126934, ENSG00000164086, ENSG00000185650, ENSG00000106100, ENSG00000130829, ENSG00000102882	2301	55	19308	1.98336	1	0.586679	0.578269
GOTERM_BP_DIRECT	GO:0071407~cellular response to organic cyclic compound	13	0.504854	0.0263072	ENSG00000103241, ENSG00000074047, ENSG00000134046, ENSG00000134057, ENSG00000170312, ENSG00000172216, ENSG00000125538, ENSG00000184584, ENSG00000142208, ENSG00000271503, ENSG00000108691, ENSG00000100097, ENSG00000148677	2301	55	19308	1.98336	1	0.586679	0.578269
GOTERM_BP_DIRECT	GO:0070301~cellular response to hydrogen peroxide	16	0.621359	0.0264889	ENSG00000198053, ENSG00000132646, ENSG00000196591, ENSG00000197122, ENSG00000197442, ENSG00000097007, ENSG00000114346, ENSG00000136244, ENSG00000170312, ENSG00000156711, ENSG00000118503, ENSG00000106462, ENSG00000167601, ENSG00000277258, ENSG00000108179, ENSG00000166888	2301	74	19308	1.8143	1	0.588544	0.580107
GOTERM_BP_DIRECT	GO:0009954~proximal/distal pattern formation	8	0.31068	0.0287205	ENSG00000204304, ENSG00000170689, ENSG00000005073, ENSG00000180818, ENSG00000074047, ENSG00000180806, ENSG00000123388, ENSG00000128710	2301	26	19308	2.58189	1	0.635773	0.626659
GOTERM_BP_DIRECT	GO:0006402~mRNA catabolic process	9	0.349515	0.0306042	ENSG00000178764, ENSG00000164167, ENSG00000138035, ENSG00000165819, ENSG00000144580, ENSG00000172795, ENSG00000204392, ENSG00000134698, ENSG00000106355	2301	32	19308	2.36001	1	0.672162	0.662526
GOTERM_BP_DIRECT	GO:0002218~activation of innate immune response	9	0.349515	0.0306042	ENSG00000164430, ENSG00000239306, ENSG00000079246, ENSG00000121390, ENSG00000184584, ENSG00000163568, ENSG00000253729, ENSG00000189403, ENSG00000163565	2301	32	19308	2.36001	1	0.672162	0.662526
GOTERM_BP_DIRECT	GO:0008630~intrinsic apoptotic signaling pathway in response to DNA damage	12	0.466019	0.0308151	ENSG00000090097, ENSG00000112096, ENSG00000263528, ENSG00000116062, ENSG00000097007, ENSG00000101412, ENSG00000253729, ENSG00000176720, ENSG00000002330, ENSG00000028137, ENSG00000183765, ENSG00000012048	2301	50	19308	2.01387	1	0.672162	0.662526
GOTERM_BP_DIRECT	GO:0036211~protein modification process	17	0.660194	0.0311318	ENSG00000092295, ENSG00000103174, ENSG00000156587, ENSG00000115828, ENSG00000108106, ENSG00000130725, ENSG00000097007, ENSG00000044446, ENSG00000197930, ENSG00000253729, ENSG00000113083, ENSG00000131508, ENSG00000086475, ENSG00000182179, ENSG00000102178, ENSG00000105221, ENSG00000143322	2301	82	19308	1.73963	1	0.672162	0.662526
GOTERM_BP_DIRECT	GO:0007005~mitochondrion organization	17	0.660194	0.0311318	ENSG00000050426, ENSG00000105971, ENSG00000221829, ENSG00000173171, ENSG00000196365, ENSG00000177034, ENSG00000197785, ENSG00000074582, ENSG00000005156, ENSG00000162430, ENSG00000165283, ENSG00000164362, ENSG00000117280, ENSG00000106153, ENSG00000146410, ENSG00000277443, ENSG00000215021	2301	82	19308	1.73963	1	0.672162	0.662526
GOTERM_BP_DIRECT	GO:0001541~ovarian follicle development	11	0.427184	0.0313302	ENSG00000221829, ENSG00000112715, ENSG00000198783, ENSG00000100206, ENSG00000123999, ENSG00000104899, ENSG00000172216, ENSG00000136997, ENSG00000090339, ENSG00000123342, ENSG00000122641	2301	44	19308	2.09778	1	0.672162	0.662526
GOTERM_BP_DIRECT	GO:0048678~response to axon injury	10	0.38835	0.0313454	ENSG00000171160, ENSG00000112096, ENSG00000100401, ENSG00000254087, ENSG00000082482, ENSG00000170312, ENSG00000138685, ENSG00000116984, ENSG00000100097, ENSG00000167601	2301	38	19308	2.20819	1	0.672162	0.662526
GOTERM_BP_DIRECT	GO:0046718~viral entry into host cell	20	0.776699	0.0313485	ENSG00000073008, ENSG00000092445, ENSG00000173020, ENSG00000132517, ENSG00000135047, ENSG00000139514, ENSG00000130164, ENSG00000170312, ENSG00000157873, ENSG00000171105, ENSG00000168028, ENSG00000115221, ENSG00000146648, ENSG00000057149, ENSG00000124789, ENSG00000188313, ENSG00000184990, ENSG00000090339, ENSG00000167601, ENSG00000163347	2301	102	19308	1.64532	1	0.672162	0.662526
GOTERM_BP_DIRECT	GO:0042127~regulation of cell proliferation	29	1.12621	0.031432	ENSG00000077238, ENSG00000041982, ENSG00000116584, ENSG00000169248, ENSG00000115392, ENSG00000118515, ENSG00000128714, ENSG00000149554, ENSG00000057657, ENSG00000100300, ENSG00000015475, ENSG00000106462, ENSG00000092969, ENSG00000197063, ENSG00000065361, ENSG00000089050, ENSG00000126561, ENSG00000111206, ENSG00000134046, ENSG00000163191, ENSG00000205250, ENSG00000074590, ENSG00000173757, ENSG0000…	2301	164	19308	1.4838	1	0.672162	0.662526
GOTERM_BP_DIRECT	GO:0080111~DNA demethylation	7	0.271845	0.0317089	ENSG00000189046, ENSG00000244509, ENSG00000128394, ENSG00000239713, ENSG00000160993, ENSG00000187605, ENSG00000138336	2301	21	19308	2.79704	1	0.672162	0.662526
GOTERM_BP_DIRECT	GO:0016571~histone methylation	7	0.271845	0.0317089	ENSG00000142453, ENSG00000147548, ENSG00000165671, ENSG00000074266, ENSG00000148335, ENSG00000106462, ENSG00000142611	2301	21	19308	2.79704	1	0.672162	0.662526
GOTERM_BP_DIRECT	GO:2000647~negative regulation of stem cell proliferation	7	0.271845	0.0317089	ENSG00000077942, ENSG00000123080, ENSG00000172819, ENSG00000101311, ENSG00000138685, ENSG00000141510, ENSG00000156535	2301	21	19308	2.79704	1	0.672162	0.662526
GOTERM_BP_DIRECT	GO:1903715~regulation of aerobic respiration	5	0.194175	0.0332523	ENSG00000213465, ENSG00000100644, ENSG00000182199, ENSG00000142208, ENSG00000111199	2301	11	19308	3.81415	1	0.695054	0.685089
GOTERM_BP_DIRECT	GO:1904871~positive regulation of protein localization to Cajal body	5	0.194175	0.0332523	ENSG00000120438, ENSG00000150753, ENSG00000156261, ENSG00000130826, ENSG00000146731	2301	11	19308	3.81415	1	0.695054	0.685089
GOTERM_BP_DIRECT	GO:1904668~positive regulation of ubiquitin protein ligase activity	5	0.194175	0.0332523	ENSG00000117399, ENSG00000175063, ENSG00000166851, ENSG00000108106, ENSG00000120539	2301	11	19308	3.81415	1	0.695054	0.685089
GOTERM_BP_DIRECT	GO:0046940~nucleoside monophosphate phosphorylation	5	0.194175	0.0332523	ENSG00000134326, ENSG00000004455, ENSG00000168393, ENSG00000162433, ENSG00000162368	2301	11	19308	3.81415	1	0.695054	0.685089
GOTERM_BP_DIRECT	GO:0006488~dolichol-linked oligosaccharide biosynthetic process	6	0.23301	0.0337917	ENSG00000139133, ENSG00000172339, ENSG00000159063, ENSG00000214160, ENSG00000172269, ENSG00000175548	2301	16	19308	3.14668	1	0.696619	0.686633
GOTERM_BP_DIRECT	GO:0048566~embryonic digestive tract development	6	0.23301	0.0337917	ENSG00000137273, ENSG00000196839, ENSG00000074047, ENSG00000162878, ENSG00000169429, ENSG00000092969	2301	16	19308	3.14668	1	0.696619	0.686633
GOTERM_BP_DIRECT	GO:0006165~nucleoside diphosphate phosphorylation	6	0.23301	0.0337917	ENSG00000134326, ENSG00000172113, ENSG00000103202, ENSG00000239672, ENSG00000162433, ENSG00000162368	2301	16	19308	3.14668	1	0.696619	0.686633
GOTERM_BP_DIRECT	GO:1904385~cellular response to angiotensin	6	0.23301	0.0337917	ENSG00000136492, ENSG00000109320, ENSG00000136997, ENSG00000049618, ENSG00000122641, ENSG00000094804	2301	16	19308	3.14668	1	0.696619	0.686633
GOTERM_BP_DIRECT	GO:0042060~wound healing	20	0.776699	0.0342983	ENSG00000065361, ENSG00000162407, ENSG00000197442, ENSG00000196531, ENSG00000041982, ENSG00000157168, ENSG00000138685, ENSG00000003402, ENSG00000115221, ENSG00000137693, ENSG00000146648, ENSG00000183691, ENSG00000113083, ENSG00000167880, ENSG00000149269, ENSG00000141756, ENSG00000106991, ENSG00000142632, ENSG00000124882, ENSG00000092969	2301	103	19308	1.62935	1	0.704642	0.69454
GOTERM_BP_DIRECT	GO:1900087~positive regulation of G1/S transition of mitotic cell cycle	12	0.466019	0.0352062	ENSG00000110092, ENSG00000167325, ENSG00000198176, ENSG00000146648, ENSG00000151849, ENSG00000164362, ENSG00000142208, ENSG00000155858, ENSG00000154734, ENSG00000123473, ENSG00000141564, ENSG00000156876	2301	51	19308	1.97438	1	0.720826	0.710492
GOTERM_BP_DIRECT	GO:1902459~positive regulation of stem cell population maintenance	11	0.427184	0.0361291	ENSG00000136518, ENSG00000102054, ENSG00000196591, ENSG00000137693, ENSG00000089094, ENSG00000112624, ENSG00000127616, ENSG00000028310, ENSG00000162521, ENSG00000138336, ENSG00000130024	2301	45	19308	2.05117	1	0.731092	0.720611
GOTERM_BP_DIRECT	GO:0043967~histone H4 acetylation	11	0.427184	0.0361291	ENSG00000136518, ENSG00000183207, ENSG00000121579, ENSG00000139618, ENSG00000128708, ENSG00000175792, ENSG00000112983, ENSG00000127337, ENSG00000178409, ENSG00000171148, ENSG00000101189	2301	45	19308	2.05117	1	0.731092	0.720611
GOTERM_BP_DIRECT	GO:0006099~tricarboxylic acid cycle	9	0.349515	0.036317	ENSG00000172340, ENSG00000150768, ENSG00000062485, ENSG00000182054, ENSG00000014641, ENSG00000131828, ENSG00000181192, ENSG00000101365, ENSG00000112992	2301	33	19308	2.28849	1	0.731092	0.720611
GOTERM_BP_DIRECT	GO:0030488~tRNA methylation	9	0.349515	0.036317	ENSG00000089195, ENSG00000188917, ENSG00000137760, ENSG00000126814, ENSG00000066651, ENSG00000138050, ENSG00000162623, ENSG00000068438, ENSG00000135297	2301	33	19308	2.28849	1	0.731092	0.720611
GOTERM_BP_DIRECT	GO:0050769~positive regulation of neurogenesis	9	0.349515	0.036317	ENSG00000198959, ENSG00000079246, ENSG00000198908, ENSG00000196584, ENSG00000169220, ENSG00000081479, ENSG00000158234, ENSG00000065526, ENSG00000187109	2301	33	19308	2.28849	1	0.731092	0.720611
GOTERM_BP_DIRECT	GO:0045727~positive regulation of translation	17	0.660194	0.0380238	ENSG00000069399, ENSG00000130305, ENSG00000165819, ENSG00000104824, ENSG00000138668, ENSG00000155506, ENSG00000136244, ENSG00000253729, ENSG00000136997, ENSG00000115687, ENSG00000242372, ENSG00000135842, ENSG00000135446, ENSG00000089154, ENSG00000100353, ENSG00000102882, ENSG00000168228	2301	84	19308	1.69821	1	0.741999	0.731362
GOTERM_BP_DIRECT	GO:0010977~negative regulation of neuron projection development	15	0.582524	0.0387482	ENSG00000107104, ENSG00000107984, ENSG00000198121, ENSG00000196591, ENSG00000186907, ENSG00000166170, ENSG00000111199, ENSG00000004478, ENSG00000169410, ENSG00000185133, ENSG00000117280, ENSG00000109099, ENSG00000123384, ENSG00000149922, ENSG00000100097	2301	71	19308	1.77277	1	0.741999	0.731362
GOTERM_BP_DIRECT	GO:0014070~response to organic cyclic compound	15	0.582524	0.0387482	ENSG00000104332, ENSG00000093010, ENSG00000126067, ENSG00000149485, ENSG00000076555, ENSG00000104899, ENSG00000105835, ENSG00000137700, ENSG00000134363, ENSG00000170312, ENSG00000136160, ENSG00000123268, ENSG00000254087, ENSG00000141753, ENSG00000108773	2301	71	19308	1.77277	1	0.741999	0.731362
GOTERM_BP_DIRECT	GO:1904719~positive regulation of AMPA glutamate receptor clustering	3	0.116505	0.0391768	ENSG00000132535, ENSG00000084112, ENSG00000104219	2301	3	19308	8.39113	1	0.741999	0.731362
GOTERM_BP_DIRECT	GO:0098903~regulation of membrane repolarization during action potential	3	0.116505	0.0391768	ENSG00000105974, ENSG00000153956, ENSG00000167535	2301	3	19308	8.39113	1	0.741999	0.731362
GOTERM_BP_DIRECT	GO:0070141~response to UV-A	3	0.116505	0.0391768	ENSG00000110092, ENSG00000146648, ENSG00000142208	2301	3	19308	8.39113	1	0.741999	0.731362
GOTERM_BP_DIRECT	GO:0006213~pyrimidine nucleoside metabolic process	3	0.116505	0.0391768	ENSG00000025708, ENSG00000100632, ENSG00000122643	2301	3	19308	8.39113	1	0.741999	0.731362
GOTERM_BP_DIRECT	GO:0071962~mitotic sister chromatid cohesion, centromeric	3	0.116505	0.0391768	ENSG00000121579, ENSG00000145919, ENSG00000129810	2301	3	19308	8.39113	1	0.741999	0.731362
GOTERM_BP_DIRECT	GO:0101030~tRNA-guanine transglycosylation	3	0.116505	0.0391768	ENSG00000213339, ENSG00000165118, ENSG00000151576	2301	3	19308	8.39113	1	0.741999	0.731362
GOTERM_BP_DIRECT	GO:0006273~lagging strand elongation	3	0.116505	0.0391768	ENSG00000101868, ENSG00000005156, ENSG00000105486	2301	3	19308	8.39113	1	0.741999	0.731362
GOTERM_BP_DIRECT	GO:0006998~nuclear envelope organization	7	0.271845	0.0393375	ENSG00000176619, ENSG00000175826, ENSG00000168476, ENSG00000102900, ENSG00000113569, ENSG00000136827, ENSG00000113368	2301	22	19308	2.66991	1	0.741999	0.731362
GOTERM_BP_DIRECT	GO:0001836~release of cytochrome c from mitochondria	7	0.271845	0.0393375	ENSG00000112096, ENSG00000006625, ENSG00000176720, ENSG00000002330, ENSG00000015475, ENSG00000105197, ENSG00000141510	2301	22	19308	2.66991	1	0.741999	0.731362
GOTERM_BP_DIRECT	GO:0007004~telomere maintenance via telomerase	7	0.271845	0.0393375	ENSG00000140451, ENSG00000145912, ENSG00000110958, ENSG00000164362, ENSG00000130826, ENSG00000020922, ENSG00000109534	2301	22	19308	2.66991	1	0.741999	0.731362
GOTERM_BP_DIRECT	GO:0071539~protein localization to centrosome	7	0.271845	0.0393375	ENSG00000139350, ENSG00000087586, ENSG00000175455, ENSG00000198920, ENSG00000147316, ENSG00000123473, ENSG00000076382	2301	22	19308	2.66991	1	0.741999	0.731362
GOTERM_BP_DIRECT	GO:0032204~regulation of telomere maintenance	7	0.271845	0.0393375	ENSG00000156831, ENSG00000140451, ENSG00000079246, ENSG00000169189, ENSG00000138668, ENSG00000136997, ENSG00000133302	2301	22	19308	2.66991	1	0.741999	0.731362
GOTERM_BP_DIRECT	GO:0006977~DNA damage response, signal transduction by p53 class mediator resulting in cell cycle arrest	7	0.271845	0.0393375	ENSG00000075218, ENSG00000090097, ENSG00000185499, ENSG00000078304, ENSG00000183765, ENSG00000141510, ENSG00000145632	2301	22	19308	2.66991	1	0.741999	0.731362
GOTERM_BP_DIRECT	GO:0097191~extrinsic apoptotic signaling pathway	12	0.466019	0.040019	ENSG00000104332, ENSG00000164342, ENSG00000137693, ENSG00000129484, ENSG00000184990, ENSG00000167815, ENSG00000002330, ENSG00000015475, ENSG00000028137, ENSG00000239697, ENSG00000122641, ENSG00000092969	2301	52	19308	1.93642	1	0.741999	0.731362
GOTERM_BP_DIRECT	GO:0072089~stem cell proliferation	12	0.466019	0.040019	ENSG00000132688, ENSG00000137693, ENSG00000123080, ENSG00000172819, ENSG00000124813, ENSG00000108375, ENSG00000112578, ENSG00000138685, ENSG00000108379, ENSG00000141510, ENSG00000168944, ENSG00000156535	2301	52	19308	1.93642	1	0.741999	0.731362
GOTERM_BP_DIRECT	GO:0006898~receptor-mediated endocytosis	16	0.621359	0.0404763	ENSG00000106367, ENSG00000131238, ENSG00000106327, ENSG00000081479, ENSG00000072571, ENSG00000130340, ENSG00000130164, ENSG00000196338, ENSG00000153246, ENSG00000171105, ENSG00000166126, ENSG00000146648, ENSG00000100139, ENSG00000160255, ENSG00000123384, ENSG00000161921	2301	78	19308	1.72126	1	0.741999	0.731362
GOTERM_BP_DIRECT	GO:0006563~L-serine metabolic process	4	0.15534	0.0408167	ENSG00000274276, ENSG00000182199, ENSG00000160200, ENSG00000176974	2301	7	19308	4.79493	1	0.741999	0.731362
GOTERM_BP_DIRECT	GO:2000210~positive regulation of anoikis	4	0.15534	0.0408167	ENSG00000142178, ENSG00000104964, ENSG00000132382, ENSG00000183765	2301	7	19308	4.79493	1	0.741999	0.731362
GOTERM_BP_DIRECT	GO:0007077~mitotic nuclear envelope disassembly	4	0.15534	0.0408167	ENSG00000100749, ENSG00000166851, ENSG00000175826, ENSG00000119408	2301	7	19308	4.79493	1	0.741999	0.731362
GOTERM_BP_DIRECT	GO:0071035~nuclear polyadenylation-dependent rRNA catabolic process	4	0.15534	0.0408167	ENSG00000123737, ENSG00000120699, ENSG00000171824, ENSG00000130713	2301	7	19308	4.79493	1	0.741999	0.731362
GOTERM_BP_DIRECT	GO:0071038~nuclear polyadenylation-dependent tRNA catabolic process	4	0.15534	0.0408167	ENSG00000123737, ENSG00000120699, ENSG00000171824, ENSG00000130713	2301	7	19308	4.79493	1	0.741999	0.731362
GOTERM_BP_DIRECT	GO:0097294~'de novo' XMP biosynthetic process	4	0.15534	0.0408167	ENSG00000138363, ENSG00000159131, ENSG00000128050, ENSG00000178921	2301	7	19308	4.79493	1	0.741999	0.731362
GOTERM_BP_DIRECT	GO:0046600~negative regulation of centriole replication	4	0.15534	0.0408167	ENSG00000239306, ENSG00000136861, ENSG00000012048, ENSG00000108773	2301	7	19308	4.79493	1	0.741999	0.731362
GOTERM_BP_DIRECT	GO:0032466~negative regulation of cytokinesis	4	0.15534	0.0408167	ENSG00000164695, ENSG00000129173, ENSG00000165891, ENSG00000178999	2301	7	19308	4.79493	1	0.741999	0.731362
GOTERM_BP_DIRECT	GO:0071459~protein localization to chromosome, centromeric region	4	0.15534	0.0408167	ENSG00000115163, ENSG00000156970, ENSG00000145919, ENSG00000177602	2301	7	19308	4.79493	1	0.741999	0.731362
GOTERM_BP_DIRECT	GO:0046033~AMP metabolic process	4	0.15534	0.0408167	ENSG00000133805, ENSG00000004455, ENSG00000116337, ENSG00000162433	2301	7	19308	4.79493	1	0.741999	0.731362
GOTERM_BP_DIRECT	GO:0000056~ribosomal small subunit export from nucleus	4	0.15534	0.0408167	ENSG00000108559, ENSG00000132341, ENSG00000082898, ENSG00000135521	2301	7	19308	4.79493	1	0.741999	0.731362
GOTERM_BP_DIRECT	GO:0044806~G-quadruplex DNA unwinding	4	0.15534	0.0408167	ENSG00000197299, ENSG00000013573, ENSG00000122566, ENSG00000138346	2301	7	19308	4.79493	1	0.741999	0.731362
GOTERM_BP_DIRECT	GO:1901165~positive regulation of trophoblast cell migration	4	0.15534	0.0408167	ENSG00000112715, ENSG00000105137, ENSG00000108561, ENSG00000123908	2301	7	19308	4.79493	1	0.741999	0.731362
GOTERM_BP_DIRECT	GO:1902042~negative regulation of extrinsic apoptotic signaling pathway via death domain receptors	8	0.31068	0.0419166	ENSG00000116584, ENSG00000118503, ENSG00000148841, ENSG00000158234, ENSG00000003402, ENSG00000090339, ENSG00000164104, ENSG00000012048	2301	28	19308	2.39747	1	0.755127	0.744302
GOTERM_BP_DIRECT	GO:2000779~regulation of double-strand break repair	8	0.31068	0.0419166	ENSG00000136518, ENSG00000183207, ENSG00000175792, ENSG00000112983, ENSG00000127337, ENSG00000149923, ENSG00000101189, ENSG00000124795	2301	28	19308	2.39747	1	0.755127	0.744302
GOTERM_BP_DIRECT	GO:0046686~response to cadmium ion	8	0.31068	0.0419166	ENSG00000132646, ENSG00000112096, ENSG00000140263, ENSG00000012061, ENSG00000164362, ENSG00000120053, ENSG00000168393, ENSG00000170312	2301	28	19308	2.39747	1	0.755127	0.744302
GOTERM_BP_DIRECT	GO:0048255~mRNA stabilization	9	0.349515	0.0427056	ENSG00000112183, ENSG00000089280, ENSG00000082512, ENSG00000056972, ENSG00000263528, ENSG00000138668, ENSG00000101412, ENSG00000155506, ENSG00000127191	2301	34	19308	2.22118	1	0.764748	0.753785
GOTERM_BP_DIRECT	GO:0021510~spinal cord development	9	0.349515	0.0427056	ENSG00000136518, ENSG00000183691, ENSG00000092621, ENSG00000128309, ENSG00000074266, ENSG00000115318, ENSG00000142208, ENSG00000117569, ENSG00000184634	2301	34	19308	2.22118	1	0.764748	0.753785
GOTERM_BP_DIRECT	GO:0046328~regulation of JNK cascade	6	0.23301	0.0433087	ENSG00000146648, ENSG00000071054, ENSG00000156463, ENSG00000135272, ENSG00000164251, ENSG00000127191	2301	17	19308	2.96158	1	0.768665	0.757646
GOTERM_BP_DIRECT	GO:0071732~cellular response to nitric oxide	6	0.23301	0.0433087	ENSG00000138668, ENSG00000127191, ENSG00000145386, ENSG00000116984, ENSG00000003402, ENSG00000123374	2301	17	19308	2.96158	1	0.768665	0.757646
GOTERM_BP_DIRECT	GO:2001034~positive regulation of double-strand break repair via nonhomologous end joining	6	0.23301	0.0433087	ENSG00000116670, ENSG00000041880, ENSG00000080345, ENSG00000253729, ENSG00000186280, ENSG00000110066	2301	17	19308	2.96158	1	0.768665	0.757646
GOTERM_BP_DIRECT	GO:0006357~regulation of transcription from RNA polymerase II promoter	229	8.8932	0.0447079	ENSG00000111912, ENSG00000106689, ENSG00000143190, ENSG00000186918, ENSG00000139800, ENSG00000189079, ENSG00000170448, ENSG00000170689, ENSG00000180806, ENSG00000090447, ENSG00000012048, ENSG00000106443, ENSG00000124795, ENSG00000156374, ENSG00000109705, ENSG00000181472, ENSG00000114853, ENSG00000172888, ENSG00000189067, ENSG00000204304, ENSG00000100219, ENSG00000081059, ENSG00000180818, ENSG0000…	2301	1723	19308	1.11525	1	0.782917	0.771694
GOTERM_BP_DIRECT	GO:0043491~protein kinase B signaling	12	0.466019	0.0452694	ENSG00000153064, ENSG00000125538, ENSG00000092445, ENSG00000113083, ENSG00000185650, ENSG00000271503, ENSG00000142208, ENSG00000108691, ENSG00000157168, ENSG00000138685, ENSG00000105221, ENSG00000167601	2301	53	19308	1.89988	1	0.782917	0.771694
GOTERM_BP_DIRECT	GO:0016575~histone deacetylation	12	0.466019	0.0452694	ENSG00000102054, ENSG00000149480, ENSG00000177565, ENSG00000196591, ENSG00000182979, ENSG00000239306, ENSG00000061273, ENSG00000134046, ENSG00000170004, ENSG00000124496, ENSG00000162521, ENSG00000057935	2301	53	19308	1.89988	1	0.782917	0.771694
GOTERM_BP_DIRECT	GO:0051983~regulation of chromosome segregation	5	0.194175	0.0452863	ENSG00000169679, ENSG00000184661, ENSG00000142945, ENSG00000148773, ENSG00000178999	2301	12	19308	3.49631	1	0.782917	0.771694
GOTERM_BP_DIRECT	GO:0006090~pyruvate metabolic process	5	0.194175	0.0452863	ENSG00000213585, ENSG00000111716, ENSG00000100889, ENSG00000150768, ENSG00000151376	2301	12	19308	3.49631	1	0.782917	0.771694
GOTERM_BP_DIRECT	GO:0010936~negative regulation of macrophage cytokine production	5	0.194175	0.0452863	ENSG00000160703, ENSG00000107874, ENSG00000090376, ENSG00000167601, ENSG00000092969	2301	12	19308	3.49631	1	0.782917	0.771694
GOTERM_BP_DIRECT	GO:0045842~positive regulation of mitotic metaphase/anaphase transition	5	0.194175	0.0452863	ENSG00000156831, ENSG00000141552, ENSG00000094880, ENSG00000135476, ENSG00000126787	2301	12	19308	3.49631	1	0.782917	0.771694
GOTERM_BP_DIRECT	GO:0051315~attachment of mitotic spindle microtubules to kinetochore	5	0.194175	0.0452863	ENSG00000143228, ENSG00000080986, ENSG00000138778, ENSG00000142945, ENSG00000167513	2301	12	19308	3.49631	1	0.782917	0.771694
GOTERM_BP_DIRECT	GO:0006241~CTP biosynthetic process	5	0.194175	0.0452863	ENSG00000172113, ENSG00000171793, ENSG00000047230, ENSG00000103202, ENSG00000239672	2301	12	19308	3.49631	1	0.782917	0.771694
GOTERM_BP_DIRECT	GO:0006120~mitochondrial electron transport, NADH to ubiquinone	11	0.427184	0.0472045	ENSG00000065518, ENSG00000109390, ENSG00000168653, ENSG00000167792, ENSG00000139180, ENSG00000145494, ENSG00000099795, ENSG00000110717, ENSG00000023228, ENSG00000125356, ENSG00000213619	2301	47	19308	1.96388	1	0.813736	0.80207
GOTERM_BP_DIRECT	GO:0019221~cytokine-mediated signaling pathway	27	1.04854	0.0478012	ENSG00000105974, ENSG00000026508, ENSG00000077238, ENSG00000090376, ENSG00000144580, ENSG00000002330, ENSG00000175505, ENSG00000198959, ENSG00000102007, ENSG00000142208, ENSG00000185436, ENSG00000016402, ENSG00000126561, ENSG00000104998, ENSG00000115008, ENSG00000136244, ENSG00000174564, ENSG00000117525, ENSG00000159128, ENSG00000173757, ENSG00000110395, ENSG00000125538, ENSG00000168685, ENSG0000…	2301	156	19308	1.45231	1	0.820981	0.809211
GOTERM_BP_DIRECT	GO:0001556~oocyte maturation	7	0.271845	0.0480354	ENSG00000100206, ENSG00000139618, ENSG00000112029, ENSG00000071539, ENSG00000134057, ENSG00000101224, ENSG00000124882	2301	23	19308	2.55382	1	0.820981	0.809211
GOTERM_BP_DIRECT	GO:0006541~glutamine metabolic process	7	0.271845	0.0480354	ENSG00000111371, ENSG00000092621, ENSG00000084774, ENSG00000171793, ENSG00000047230, ENSG00000178921, ENSG00000163655	2301	23	19308	2.55382	1	0.820981	0.809211
GOTERM_BP_DIRECT	GO:0030199~collagen fibril organization	13	0.504854	0.0483208	ENSG00000111799, ENSG00000115318, ENSG00000170275, ENSG00000038295, ENSG00000138131, ENSG00000113083, ENSG00000130309, ENSG00000149257, ENSG00000141756, ENSG00000106397, ENSG00000129038, ENSG00000092969, ENSG00000141696	2301	60	19308	1.81808	1	0.823513	0.811708
GOTERM_BP_DIRECT	GO:0031295~T cell costimulation	10	0.38835	0.0487976	ENSG00000159958, ENSG00000105974, ENSG00000197122, ENSG00000120217, ENSG00000142208, ENSG00000254087, ENSG00000103653, ENSG00000157873, ENSG00000197646, ENSG00000100097	2301	41	19308	2.04662	1	0.824611	0.812789
GOTERM_BP_DIRECT	GO:0033574~response to testosterone	10	0.38835	0.0487976	ENSG00000005073, ENSG00000084774, ENSG00000128714, ENSG00000100300, ENSG00000132780, ENSG00000002330, ENSG00000003402, ENSG00000135446, ENSG00000239672, ENSG00000110395	2301	41	19308	2.04662	1	0.824611	0.812789
GOTERM_BP_DIRECT	GO:0061077~chaperone-mediated protein folding	10	0.38835	0.0487976	ENSG00000136827, ENSG00000120438, ENSG00000170275, ENSG00000150753, ENSG00000156261, ENSG00000104969, ENSG00000146731, ENSG00000160049, ENSG00000004478, ENSG00000106211	2301	41	19308	2.04662	1	0.824611	0.812789
GOTERM_BP_DIRECT	GO:0000462~maturation of SSU-rRNA from tricistronic rRNA transcript (SSU-rRNA, 5.8S rRNA, LSU-rRNA)	8	0.31068	0.049776	ENSG00000117597, ENSG00000167721, ENSG00000141076, ENSG00000087269, ENSG00000129460, ENSG00000163811, ENSG00000112578, ENSG00000127311	2301	29	19308	2.3148	1	0.834096	0.822139
GOTERM_BP_DIRECT	GO:0070372~regulation of ERK1 and ERK2 cascade	8	0.31068	0.049776	ENSG00000079385, ENSG00000146648, ENSG00000125538, ENSG00000149089, ENSG00000101447, ENSG00000254087, ENSG00000115414, ENSG00000100462	2301	29	19308	2.3148	1	0.834096	0.822139
GOTERM_BP_DIRECT	GO:0046697~decidualization	8	0.31068	0.049776	ENSG00000165474, ENSG00000073756, ENSG00000113739, ENSG00000128342, ENSG00000129484, ENSG00000158796, ENSG00000136943, ENSG00000102882	2301	29	19308	2.3148	1	0.834096	0.822139
GOTERM_BP_DIRECT	GO:0071260~cellular response to mechanical stimulus	17	0.660194	0.0503303	ENSG00000073756, ENSG00000150051, ENSG00000111321, ENSG00000002330, ENSG00000138685, ENSG00000137752, ENSG00000118412, ENSG00000164342, ENSG00000146648, ENSG00000125538, ENSG00000120053, ENSG00000109320, ENSG00000142208, ENSG00000149554, ENSG00000106991, ENSG00000102882, ENSG00000148677	2301	87	19308	1.63965	1	0.841035	0.828978
GOTERM_BP_DIRECT	GO:0035690~cellular response to drug	14	0.543689	0.0507119	ENSG00000099901, ENSG00000136997, ENSG00000065989, ENSG00000164342, ENSG00000146648, ENSG00000125538, ENSG00000084774, ENSG00000163568, ENSG00000184588, ENSG00000183765, ENSG00000239672, ENSG00000141510, ENSG00000148677, ENSG00000108883	2301	67	19308	1.75337	1	0.845057	0.832943
GOTERM_BP_DIRECT	GO:0071364~cellular response to epidermal growth factor stimulus	11	0.427184	0.0535143	ENSG00000146648, ENSG00000185650, ENSG00000084774, ENSG00000142208, ENSG00000166508, ENSG00000128944, ENSG00000166986, ENSG00000136997, ENSG00000003402, ENSG00000173757, ENSG00000110395	2301	48	19308	1.92297	1	0.889287	0.876538
GOTERM_BP_DIRECT	GO:0030155~regulation of cell adhesion	13	0.504854	0.0538971	ENSG00000112769, ENSG00000118193, ENSG00000097007, ENSG00000174951, ENSG00000041982, ENSG00000074590, ENSG00000136153, ENSG00000185104, ENSG00000106991, ENSG00000169429, ENSG00000143322, ENSG00000183943, ENSG00000011422	2301	61	19308	1.78827	1	0.893174	0.88037
GOTERM_BP_DIRECT	GO:0042176~regulation of protein catabolic process	6	0.23301	0.0542734	ENSG00000101447, ENSG00000104219, ENSG00000116857, ENSG00000185104, ENSG00000183765, ENSG00000176108	2301	18	19308	2.79704	1	0.896932	0.884073
GOTERM_BP_DIRECT	GO:0032465~regulation of cytokinesis	10	0.38835	0.0558032	ENSG00000166851, ENSG00000139618, ENSG00000087586, ENSG00000112984, ENSG00000198901, ENSG00000178999, ENSG00000142731, ENSG00000145632, ENSG00000105255, ENSG00000278259	2301	42	19308	1.99789	1	0.917308	0.904158
GOTERM_BP_DIRECT	GO:0043065~positive regulation of apoptotic process	50	1.94175	0.0558296	ENSG00000073756, ENSG00000097007, ENSG00000130758, ENSG00000128272, ENSG00000114346, ENSG00000135446, ENSG00000035681, ENSG00000100300, ENSG00000090447, ENSG00000015475, ENSG00000130829, ENSG00000165304, ENSG00000104332, ENSG00000197122, ENSG00000176046, ENSG00000197442, ENSG00000176720, ENSG00000164342, ENSG00000121858, ENSG00000184254, ENSG00000100216, ENSG00000105185, ENSG00000185104, ENSG0000…	2301	328	19308	1.27914	1	0.917308	0.904158
GOTERM_BP_DIRECT	GO:0045582~positive regulation of T cell differentiation	9	0.349515	0.0576004	ENSG00000189079, ENSG00000136518, ENSG00000100219, ENSG00000127616, ENSG00000139613, ENSG00000002330, ENSG00000110492, ENSG00000049618, ENSG00000130024	2301	36	19308	2.09778	1	0.917308	0.904158
GOTERM_BP_DIRECT	GO:0032743~positive regulation of interleukin-2 production	9	0.349515	0.0576004	ENSG00000125538, ENSG00000172175, ENSG00000165283, ENSG00000113448, ENSG00000097007, ENSG00000115008, ENSG00000184588, ENSG00000127191, ENSG00000173757	2301	36	19308	2.09778	1	0.917308	0.904158
GOTERM_BP_DIRECT	GO:0007020~microtubule nucleation	7	0.271845	0.0578274	ENSG00000072864, ENSG00000137814, ENSG00000139350, ENSG00000151849, ENSG00000088325, ENSG00000126216, ENSG00000137822	2301	24	19308	2.44741	1	0.917308	0.904158
GOTERM_BP_DIRECT	GO:0010506~regulation of autophagy	15	0.582524	0.0578322	ENSG00000173264, ENSG00000176046, ENSG00000097007, ENSG00000181085, ENSG00000176720, ENSG00000137752, ENSG00000162341, ENSG00000079999, ENSG00000156171, ENSG00000101255, ENSG00000108389, ENSG00000163565, ENSG00000143322, ENSG00000141564, ENSG00000106211	2301	75	19308	1.67823	1	0.917308	0.904158
GOTERM_BP_DIRECT	GO:0050900~leukocyte migration	8	0.31068	0.0585071	ENSG00000164022, ENSG00000196839, ENSG00000197122, ENSG00000164251, ENSG00000254087, ENSG00000184588, ENSG00000075340, ENSG00000090339	2301	30	19308	2.23764	1	0.917308	0.904158
GOTERM_BP_DIRECT	GO:0010575~positive regulation of vascular endothelial growth factor production	8	0.31068	0.0585071	ENSG00000170425, ENSG00000073756, ENSG00000125538, ENSG00000100644, ENSG00000128272, ENSG00000115008, ENSG00000136244, ENSG00000012048	2301	30	19308	2.23764	1	0.917308	0.904158
GOTERM_BP_DIRECT	GO:0006919~activation of cysteine-type endopeptidase activity involved in apoptotic process	16	0.621359	0.0590707	ENSG00000110911, ENSG00000144381, ENSG00000136938, ENSG00000103811, ENSG00000117525, ENSG00000176720, ENSG00000002330, ENSG00000003402, ENSG00000115541, ENSG00000118412, ENSG00000147889, ENSG00000079387, ENSG00000127946, ENSG00000015475, ENSG00000105483, ENSG00000106100	2301	82	19308	1.63729	1	0.917308	0.904158
GOTERM_BP_DIRECT	GO:0071168~protein localization to chromatin	5	0.194175	0.0594224	ENSG00000166851, ENSG00000095002, ENSG00000125885, ENSG00000106462, ENSG00000164754	2301	13	19308	3.22736	1	0.917308	0.904158
GOTERM_BP_DIRECT	GO:0046785~microtubule polymerization	5	0.194175	0.0594224	ENSG00000112029, ENSG00000151849, ENSG00000175216, ENSG00000111199, ENSG00000166503	2301	13	19308	3.22736	1	0.917308	0.904158
GOTERM_BP_DIRECT	GO:0097242~beta-amyloid clearance	5	0.194175	0.0594224	ENSG00000160255, ENSG00000081479, ENSG00000123384, ENSG00000130164, ENSG00000171105	2301	13	19308	3.22736	1	0.917308	0.904158
GOTERM_BP_DIRECT	GO:0038066~p38MAPK cascade	5	0.194175	0.0594224	ENSG00000197442, ENSG00000185386, ENSG00000168078, ENSG00000185650, ENSG00000091436	2301	13	19308	3.22736	1	0.917308	0.904158
GOTERM_BP_DIRECT	GO:0009950~dorsal/ventral axis specification	4	0.15534	0.059635	ENSG00000104332, ENSG00000112559, ENSG00000103126, ENSG00000108379	2301	8	19308	4.19557	1	0.917308	0.904158
GOTERM_BP_DIRECT	GO:0003149~membranous septum morphogenesis	4	0.15534	0.059635	ENSG00000183691, ENSG00000180340, ENSG00000109685, ENSG00000092969	2301	8	19308	4.19557	1	0.917308	0.904158
GOTERM_BP_DIRECT	GO:0036003~positive regulation of transcription from RNA polymerase II promoter in response to stress	4	0.15534	0.059635	ENSG00000128272, ENSG00000185499, ENSG00000089154, ENSG00000141510	2301	8	19308	4.19557	1	0.917308	0.904158
GOTERM_BP_DIRECT	GO:0007091~metaphase/anaphase transition of mitotic cell cycle	4	0.15534	0.059635	ENSG00000013810, ENSG00000094880, ENSG00000156970, ENSG00000153107	2301	8	19308	4.19557	1	0.917308	0.904158
GOTERM_BP_DIRECT	GO:0032873~negative regulation of stress-activated MAPK cascade	4	0.15534	0.059635	ENSG00000168078, ENSG00000111206, ENSG00000172053, ENSG00000136997	2301	8	19308	4.19557	1	0.917308	0.904158
GOTERM_BP_DIRECT	GO:0038134~ERBB2-EGFR signaling pathway	4	0.15534	0.059635	ENSG00000146648, ENSG00000174808, ENSG00000109321, ENSG00000124882	2301	8	19308	4.19557	1	0.917308	0.904158
GOTERM_BP_DIRECT	GO:0034475~U4 snRNA 3'-end processing	4	0.15534	0.059635	ENSG00000123737, ENSG00000120699, ENSG00000077348, ENSG00000130713	2301	8	19308	4.19557	1	0.917308	0.904158
GOTERM_BP_DIRECT	GO:0017185~peptidyl-lysine hydroxylation	4	0.15534	0.059635	ENSG00000110811, ENSG00000141756, ENSG00000106397, ENSG00000141696	2301	8	19308	4.19557	1	0.917308	0.904158
GOTERM_BP_DIRECT	GO:0031497~chromatin assembly	4	0.15534	0.059635	ENSG00000167670, ENSG00000189403, ENSG00000141510, ENSG00000162521	2301	8	19308	4.19557	1	0.917308	0.904158
GOTERM_BP_DIRECT	GO:1902425~positive regulation of attachment of mitotic spindle microtubules to kinetochore	4	0.15534	0.059635	ENSG00000134690, ENSG00000089685, ENSG00000149503, ENSG00000178999	2301	8	19308	4.19557	1	0.917308	0.904158
GOTERM_BP_DIRECT	GO:0060022~hard palate development	4	0.15534	0.059635	ENSG00000115221, ENSG00000105855, ENSG00000180340, ENSG00000008516	2301	8	19308	4.19557	1	0.917308	0.904158
GOTERM_BP_DIRECT	GO:0045008~depyrimidination	4	0.15534	0.059635	ENSG00000076248, ENSG00000065057, ENSG00000129071, ENSG00000140398	2301	8	19308	4.19557	1	0.917308	0.904158
GOTERM_BP_DIRECT	GO:0033129~positive regulation of histone phosphorylation	4	0.15534	0.059635	ENSG00000125538, ENSG00000134057, ENSG00000102882, ENSG00000162302	2301	8	19308	4.19557	1	0.917308	0.904158
GOTERM_BP_DIRECT	GO:1904491~protein localization to ciliary transition zone	4	0.15534	0.059635	ENSG00000179029, ENSG00000048342, ENSG00000181085, ENSG00000168778	2301	8	19308	4.19557	1	0.917308	0.904158
GOTERM_BP_DIRECT	GO:0009887~animal organ morphogenesis	24	0.932039	0.0598084	ENSG00000022267, ENSG00000158747, ENSG00000103241, ENSG00000104964, ENSG00000112312, ENSG00000105419, ENSG00000167081, ENSG00000138685, ENSG00000205250, ENSG00000134138, ENSG00000196405, ENSG00000196878, ENSG00000058085, ENSG00000150630, ENSG00000137273, ENSG00000204304, ENSG00000169733, ENSG00000055130, ENSG00000083093, ENSG00000102302, ENSG00000108691, ENSG00000050555, ENSG00000124882	2301	138	19308	1.45933	1	0.917623	0.904468
GOTERM_BP_DIRECT	GO:0051781~positive regulation of cell division	11	0.427184	0.0603569	ENSG00000112715, ENSG00000125538, ENSG00000174808, ENSG00000115008, ENSG00000173511, ENSG00000110492, ENSG00000138685, ENSG00000143321, ENSG00000124882, ENSG00000150630, ENSG00000092969	2301	49	19308	1.88372	1	0.918987	0.905813
GOTERM_BP_DIRECT	GO:0007173~epidermal growth factor receptor signaling pathway	11	0.427184	0.0603569	ENSG00000146648, ENSG00000197122, ENSG00000168143, ENSG00000174808, ENSG00000097007, ENSG00000109321, ENSG00000142208, ENSG00000147689, ENSG00000089177, ENSG00000110395, ENSG00000124882	2301	49	19308	1.88372	1	0.918987	0.905813
GOTERM_BP_DIRECT	GO:0051603~proteolysis involved in cellular protein catabolic process	11	0.427184	0.0603569	ENSG00000163131, ENSG00000126067, ENSG00000172175, ENSG00000196365, ENSG00000103811, ENSG00000142507, ENSG00000204264, ENSG00000135047, ENSG00000125656, ENSG00000136943, ENSG00000136930	2301	49	19308	1.88372	1	0.918987	0.905813
GOTERM_BP_DIRECT	GO:0071356~cellular response to tumor necrosis factor	25	0.970874	0.0632526	ENSG00000136699, ENSG00000116584, ENSG00000100889, ENSG00000185650, ENSG00000142208, ENSG00000102882, ENSG00000169429, ENSG00000012048, ENSG00000163347, ENSG00000104332, ENSG00000197442, ENSG00000115009, ENSG00000117228, ENSG00000131196, ENSG00000117226, ENSG00000109320, ENSG00000162645, ENSG00000271503, ENSG00000108691, ENSG00000127554, ENSG00000090339, ENSG00000163874, ENSG00000126368, ENSG0000…	2301	146	19308	1.43684	1	0.960638	0.946867
GOTERM_BP_DIRECT	GO:0014068~positive regulation of phosphatidylinositol 3-kinase signaling	16	0.621359	0.0645013	ENSG00000103495, ENSG00000112715, ENSG00000074842, ENSG00000065361, ENSG00000197122, ENSG00000069869, ENSG00000115414, ENSG00000138685, ENSG00000110395, ENSG00000169071, ENSG00000171105, ENSG00000135362, ENSG00000164251, ENSG00000271503, ENSG00000143575, ENSG00000092969	2301	83	19308	1.61757	1	0.977129	0.963121
GOTERM_BP_DIRECT	GO:0007265~Ras protein signal transduction	17	0.660194	0.0651828	ENSG00000183856, ENSG00000068028, ENSG00000152689, ENSG00000115325, ENSG00000138685, ENSG00000188060, ENSG00000147889, ENSG00000158186, ENSG00000213281, ENSG00000078369, ENSG00000130816, ENSG00000145386, ENSG00000089022, ENSG00000123374, ENSG00000124782, ENSG00000141510, ENSG00000145632	2301	90	19308	1.58499	1	0.984966	0.970846
GOTERM_BP_DIRECT	GO:0006464~cellular protein modification process	18	0.699029	0.0655633	ENSG00000092295, ENSG00000103174, ENSG00000156587, ENSG00000115828, ENSG00000108106, ENSG00000130725, ENSG00000097007, ENSG00000044446, ENSG00000197930, ENSG00000253729, ENSG00000144848, ENSG00000113083, ENSG00000131508, ENSG00000086475, ENSG00000182179, ENSG00000102178, ENSG00000105221, ENSG00000143322	2301	97	19308	1.55712	1	0.988227	0.97406
GOTERM_BP_DIRECT	GO:0001570~vasculogenesis	13	0.504854	0.0663125	ENSG00000103241, ENSG00000112715, ENSG00000105974, ENSG00000105855, ENSG00000105538, ENSG00000112531, ENSG00000157212, ENSG00000137693, ENSG00000185650, ENSG00000061273, ENSG00000106991, ENSG00000182963, ENSG00000074219	2301	63	19308	1.7315	1	0.992793	0.97856
GOTERM_BP_DIRECT	GO:0051259~protein oligomerization	6	0.23301	0.0666937	ENSG00000165283, ENSG00000197299, ENSG00000184584, ENSG00000176720, ENSG00000163874, ENSG00000163347	2301	19	19308	2.64983	1	0.992793	0.97856
GOTERM_BP_DIRECT	GO:0010243~response to organonitrogen compound	6	0.23301	0.0666937	ENSG00000110092, ENSG00000126067, ENSG00000166741, ENSG00000085871, ENSG00000115008, ENSG00000069509	2301	19	19308	2.64983	1	0.992793	0.97856
GOTERM_BP_DIRECT	GO:0034244~negative regulation of transcription elongation from RNA polymerase II promoter	6	0.23301	0.0666937	ENSG00000204356, ENSG00000113649, ENSG00000188986, ENSG00000103126, ENSG00000101158, ENSG00000106462	2301	19	19308	2.64983	1	0.992793	0.97856
GOTERM_BP_DIRECT	GO:0000956~nuclear-transcribed mRNA catabolic process	6	0.23301	0.0666937	ENSG00000123737, ENSG00000130520, ENSG00000053372, ENSG00000171824, ENSG00000170860, ENSG00000130332	2301	19	19308	2.64983	1	0.992793	0.97856
GOTERM_BP_DIRECT	GO:1901224~positive regulation of NIK/NF-kappaB signaling	14	0.543689	0.0681474	ENSG00000115604, ENSG00000123609, ENSG00000204305, ENSG00000164342, ENSG00000146648, ENSG00000125538, ENSG00000176907, ENSG00000087077, ENSG00000184489, ENSG00000189403, ENSG00000184216, ENSG00000106100, ENSG00000101220, ENSG00000215021	2301	70	19308	1.67823	1	1	0.985829
GOTERM_BP_DIRECT	GO:0048661~positive regulation of smooth muscle cell proliferation	14	0.543689	0.0681474	ENSG00000073756, ENSG00000105835, ENSG00000136244, ENSG00000138685, ENSG00000136997, ENSG00000198959, ENSG00000145604, ENSG00000146648, ENSG00000085662, ENSG00000142208, ENSG00000271503, ENSG00000184216, ENSG00000166831, ENSG00000124882	2301	70	19308	1.67823	1	1	0.985829
GOTERM_BP_DIRECT	GO:0045742~positive regulation of epidermal growth factor receptor signaling pathway	7	0.271845	0.0687248	ENSG00000213024, ENSG00000127946, ENSG00000144580, ENSG00000160410, ENSG00000101213, ENSG00000110395, ENSG00000011422	2301	25	19308	2.34952	1	1	0.985829
GOTERM_BP_DIRECT	GO:0034599~cellular response to oxidative stress	17	0.660194	0.0707284	ENSG00000110911, ENSG00000196365, ENSG00000128272, ENSG00000097007, ENSG00000158169, ENSG00000165474, ENSG00000100219, ENSG00000162430, ENSG00000138035, ENSG00000112096, ENSG00000135362, ENSG00000183010, ENSG00000106153, ENSG00000079999, ENSG00000167815, ENSG00000144554, ENSG00000163874	2301	91	19308	1.56757	1	1	0.985829
GOTERM_BP_DIRECT	GO:0006470~protein dephosphorylation	26	1.00971	0.0707368	ENSG00000154845, ENSG00000158402, ENSG00000112640, ENSG00000132334, ENSG00000100526, ENSG00000084112, ENSG00000184489, ENSG00000105197, ENSG00000108389, ENSG00000130829, ENSG00000142949, ENSG00000072135, ENSG00000167393, ENSG00000158079, ENSG00000111266, ENSG00000164088, ENSG00000144579, ENSG00000164045, ENSG00000175826, ENSG00000115241, ENSG00000169410, ENSG00000164086, ENSG00000078304, ENSG0000…	2301	155	19308	1.40755	1	1	0.985829
GOTERM_BP_DIRECT	GO:0060070~canonical Wnt signaling pathway	18	0.699029	0.0709069	ENSG00000104332, ENSG00000107984, ENSG00000162407, ENSG00000180340, ENSG00000150764, ENSG00000138685, ENSG00000171016, ENSG00000134245, ENSG00000136160, ENSG00000137693, ENSG00000175826, ENSG00000081059, ENSG00000172819, ENSG00000162337, ENSG00000102312, ENSG00000103126, ENSG00000184634, ENSG00000108379	2301	98	19308	1.54123	1	1	0.985829
GOTERM_BP_DIRECT	GO:0002943~tRNA dihydrouridine synthesis	3	0.116505	0.0722027	ENSG00000105865, ENSG00000167264, ENSG00000141994	2301	4	19308	6.29335	1	1	0.985829
GOTERM_BP_DIRECT	GO:0001550~ovarian cumulus expansion	3	0.116505	0.0722027	ENSG00000163661, ENSG00000138696, ENSG00000124882	2301	4	19308	6.29335	1	1	0.985829
GOTERM_BP_DIRECT	GO:0043371~negative regulation of CD4-positive, alpha-beta T cell differentiation	3	0.116505	0.0722027	ENSG00000067955, ENSG00000189403, ENSG00000020633	2301	4	19308	6.29335	1	1	0.985829
GOTERM_BP_DIRECT	GO:0042148~strand invasion	3	0.116505	0.0722027	ENSG00000100206, ENSG00000196584, ENSG00000185379	2301	4	19308	6.29335	1	1	0.985829
GOTERM_BP_DIRECT	GO:0070814~hydrogen sulfide biosynthetic process	3	0.116505	0.0722027	ENSG00000274276, ENSG00000128309, ENSG00000160200	2301	4	19308	6.29335	1	1	0.985829
GOTERM_BP_DIRECT	GO:1905448~positive regulation of mitochondrial ATP synthesis coupled electron transport	3	0.116505	0.0722027	ENSG00000134057, ENSG00000106153, ENSG00000170312	2301	4	19308	6.29335	1	1	0.985829
GOTERM_BP_DIRECT	GO:0010749~regulation of nitric oxide mediated signal transduction	3	0.116505	0.0722027	ENSG00000112715, ENSG00000274276, ENSG00000160200	2301	4	19308	6.29335	1	1	0.985829
GOTERM_BP_DIRECT	GO:2000074~regulation of type B pancreatic cell development	3	0.116505	0.0722027	ENSG00000106615, ENSG00000142208, ENSG00000134852	2301	4	19308	6.29335	1	1	0.985829
GOTERM_BP_DIRECT	GO:0000320~re-entry into mitotic cell cycle	3	0.116505	0.0722027	ENSG00000110092, ENSG00000162063, ENSG00000136997	2301	4	19308	6.29335	1	1	0.985829
GOTERM_BP_DIRECT	GO:0032392~DNA geometric change	3	0.116505	0.0722027	ENSG00000029993, ENSG00000189403, ENSG00000164104	2301	4	19308	6.29335	1	1	0.985829
GOTERM_BP_DIRECT	GO:0001922~B-1 B cell homeostasis	3	0.116505	0.0722027	ENSG00000118503, ENSG00000100644, ENSG00000097007	2301	4	19308	6.29335	1	1	0.985829
GOTERM_BP_DIRECT	GO:0045876~positive regulation of sister chromatid cohesion	3	0.116505	0.0722027	ENSG00000168496, ENSG00000013573, ENSG00000164754	2301	4	19308	6.29335	1	1	0.985829
GOTERM_BP_DIRECT	GO:0006610~ribosomal protein import into nucleus	3	0.116505	0.0722027	ENSG00000065150, ENSG00000108424, ENSG00000086200	2301	4	19308	6.29335	1	1	0.985829
GOTERM_BP_DIRECT	GO:0048368~lateral mesoderm development	3	0.116505	0.0722027	ENSG00000137693, ENSG00000166823, ENSG00000074219	2301	4	19308	6.29335	1	1	0.985829
GOTERM_BP_DIRECT	GO:0051664~nuclear pore localization	3	0.116505	0.0722027	ENSG00000176619, ENSG00000113368, ENSG00000058804	2301	4	19308	6.29335	1	1	0.985829
GOTERM_BP_DIRECT	GO:0000915~actomyosin contractile ring assembly	3	0.116505	0.0722027	ENSG00000011426, ENSG00000114993, ENSG00000161800	2301	4	19308	6.29335	1	1	0.985829
GOTERM_BP_DIRECT	GO:1904872~regulation of telomerase RNA localization to Cajal body	3	0.116505	0.0722027	ENSG00000171824, ENSG00000172795, ENSG00000130826	2301	4	19308	6.29335	1	1	0.985829
GOTERM_BP_DIRECT	GO:0007079~mitotic chromosome movement towards spindle pole	3	0.116505	0.0722027	ENSG00000108424, ENSG00000138778, ENSG00000126787	2301	4	19308	6.29335	1	1	0.985829
GOTERM_BP_DIRECT	GO:0006235~dTTP biosynthetic process	3	0.116505	0.0722027	ENSG00000134326, ENSG00000176890, ENSG00000168393	2301	4	19308	6.29335	1	1	0.985829
GOTERM_BP_DIRECT	GO:0071042~nuclear polyadenylation-dependent mRNA catabolic process	3	0.116505	0.0722027	ENSG00000123737, ENSG00000120699, ENSG00000138035	2301	4	19308	6.29335	1	1	0.985829
GOTERM_BP_DIRECT	GO:0006220~pyrimidine nucleotide metabolic process	3	0.116505	0.0722027	ENSG00000156136, ENSG00000129187, ENSG00000047230	2301	4	19308	6.29335	1	1	0.985829
GOTERM_BP_DIRECT	GO:1905167~positive regulation of lysosomal protein catabolic process	3	0.116505	0.0722027	ENSG00000081479, ENSG00000123384, ENSG00000130164	2301	4	19308	6.29335	1	1	0.985829
GOTERM_BP_DIRECT	GO:0002455~humoral immune response mediated by circulating immunoglobulin	3	0.116505	0.0722027	ENSG00000174371, ENSG00000069399, ENSG00000188372	2301	4	19308	6.29335	1	1	0.985829
GOTERM_BP_DIRECT	GO:1905342~positive regulation of protein localization to kinetochore	3	0.116505	0.0722027	ENSG00000031691, ENSG00000080986, ENSG00000167513	2301	4	19308	6.29335	1	1	0.985829
GOTERM_BP_DIRECT	GO:0002931~response to ischemia	13	0.504854	0.0731669	ENSG00000132326, ENSG00000105974, ENSG00000144381, ENSG00000197442, ENSG00000159399, ENSG00000159200, ENSG00000049618, ENSG00000073150, ENSG00000165474, ENSG00000142208, ENSG00000015475, ENSG00000141510, ENSG00000108179	2301	64	19308	1.70445	1	1	0.985829
GOTERM_BP_DIRECT	GO:0032922~circadian regulation of gene expression	14	0.543689	0.0747369	ENSG00000123095, ENSG00000196591, ENSG00000132326, ENSG00000134107, ENSG00000108557, ENSG00000182979, ENSG00000049246, ENSG00000128272, ENSG00000105835, ENSG00000132382, ENSG00000170485, ENSG00000134852, ENSG00000100462, ENSG00000126368	2301	71	19308	1.65459	1	1	0.985829
GOTERM_BP_DIRECT	GO:0010035~response to inorganic substance	5	0.194175	0.0756126	ENSG00000138363, ENSG00000196839, ENSG00000159131, ENSG00000101126, ENSG00000101210	2301	14	19308	2.99683	1	1	0.985829
GOTERM_BP_DIRECT	GO:0045744~negative regulation of G-protein coupled receptor protein signaling pathway	5	0.194175	0.0756126	ENSG00000169220, ENSG00000181031, ENSG00000271503, ENSG00000169429, ENSG00000141576	2301	14	19308	2.99683	1	1	0.985829
GOTERM_BP_DIRECT	GO:0031053~primary miRNA processing	5	0.194175	0.0756126	ENSG00000113360, ENSG00000165819, ENSG00000112081, ENSG00000128191, ENSG00000122566	2301	14	19308	2.99683	1	1	0.985829
GOTERM_BP_DIRECT	GO:1904996~positive regulation of leukocyte adhesion to vascular endothelial cell	5	0.194175	0.0756126	ENSG00000160255, ENSG00000136244, ENSG00000110492, ENSG00000184216, ENSG00000090339	2301	14	19308	2.99683	1	1	0.985829
GOTERM_BP_DIRECT	GO:0000460~maturation of 5.8S rRNA	5	0.194175	0.0756126	ENSG00000171824, ENSG00000039123, ENSG00000253729, ENSG00000242372, ENSG00000001497	2301	14	19308	2.99683	1	1	0.985829
GOTERM_BP_DIRECT	GO:0030218~erythrocyte differentiation	11	0.427184	0.075678	ENSG00000126351, ENSG00000064393, ENSG00000105612, ENSG00000123999, ENSG00000146918, ENSG00000254087, ENSG00000164466, ENSG00000130770, ENSG00000173757, ENSG00000122641, ENSG00000113013	2301	51	19308	1.80985	1	1	0.985829
GOTERM_BP_DIRECT	GO:0050727~regulation of inflammatory response	19	0.737864	0.0762613	ENSG00000023445, ENSG00000184979, ENSG00000050426, ENSG00000074416, ENSG00000073756, ENSG00000213654, ENSG00000205542, ENSG00000041982, ENSG00000196954, ENSG00000064932, ENSG00000137752, ENSG00000204305, ENSG00000162891, ENSG00000145901, ENSG00000113360, ENSG00000187741, ENSG00000184584, ENSG00000147316, ENSG00000144554	2301	106	19308	1.50407	1	1	0.985829
GOTERM_BP_DIRECT	GO:0045766~positive regulation of angiogenesis	27	1.04854	0.0782994	ENSG00000074842, ENSG00000105855, ENSG00000103811, ENSG00000159399, ENSG00000185591, ENSG00000138772, ENSG00000100644, ENSG00000160255, ENSG00000169429, ENSG00000012048, ENSG00000239697, ENSG00000112715, ENSG00000064393, ENSG00000128165, ENSG00000115008, ENSG00000173511, ENSG00000117525, ENSG00000138685, ENSG00000123908, ENSG00000150630, ENSG00000164342, ENSG00000100219, ENSG00000125538, ENSG0000…	2301	164	19308	1.38147	1	1	0.985829
GOTERM_BP_DIRECT	GO:0001578~microtubule bundle formation	8	0.31068	0.0786281	ENSG00000163462, ENSG00000166851, ENSG00000185340, ENSG00000134222, ENSG00000136861, ENSG00000112984, ENSG00000198901, ENSG00000134369	2301	32	19308	2.09778	1	1	0.985829
GOTERM_BP_DIRECT	GO:0071466~cellular response to xenobiotic stimulus	13	0.504854	0.0804598	ENSG00000132646, ENSG00000136997, ENSG00000065989, ENSG00000164342, ENSG00000125538, ENSG00000163568, ENSG00000101412, ENSG00000166508, ENSG00000184588, ENSG00000183765, ENSG00000141510, ENSG00000148677, ENSG00000108883	2301	65	19308	1.67823	1	1	0.985829
GOTERM_BP_DIRECT	GO:0001825~blastocyst formation	6	0.23301	0.0805542	ENSG00000136518, ENSG00000133316, ENSG00000188372, ENSG00000072135, ENSG00000169908, ENSG00000116688	2301	20	19308	2.51734	1	1	0.985829
GOTERM_BP_DIRECT	GO:0051445~regulation of meiotic cell cycle	6	0.23301	0.0805542	ENSG00000141552, ENSG00000117399, ENSG00000094880, ENSG00000165819, ENSG00000066279, ENSG00000153107	2301	20	19308	2.51734	1	1	0.985829
GOTERM_BP_DIRECT	GO:0030150~protein import into mitochondrial matrix	6	0.23301	0.0805542	ENSG00000130204, ENSG00000164284, ENSG00000158882, ENSG00000105197, ENSG00000265354, ENSG00000104980	2301	20	19308	2.51734	1	1	0.985829
GOTERM_BP_DIRECT	GO:0031100~animal organ regeneration	10	0.38835	0.0805701	ENSG00000138363, ENSG00000138772, ENSG00000166741, ENSG00000101911, ENSG00000084774, ENSG00000145386, ENSG00000136877, ENSG00000170312, ENSG00000135446, ENSG00000167601	2301	45	19308	1.8647	1	1	0.985829
GOTERM_BP_DIRECT	GO:0032689~negative regulation of interferon-gamma production	10	0.38835	0.0805701	ENSG00000120217, ENSG00000123999, ENSG00000108561, ENSG00000196126, ENSG00000174564, ENSG00000189403, ENSG00000197646, ENSG00000163874, ENSG00000122641, ENSG00000167601	2301	45	19308	1.8647	1	1	0.985829
GOTERM_BP_DIRECT	GO:0070534~protein K63-linked ubiquitination	10	0.38835	0.0805701	ENSG00000147889, ENSG00000108106, ENSG00000082512, ENSG00000056972, ENSG00000169871, ENSG00000186660, ENSG00000056558, ENSG00000069869, ENSG00000127191, ENSG00000077152	2301	45	19308	1.8647	1	1	0.985829
GOTERM_BP_DIRECT	GO:0072332~intrinsic apoptotic signaling pathway by p53 class mediator	7	0.271845	0.0807261	ENSG00000169567, ENSG00000132382, ENSG00000101412, ENSG00000176720, ENSG00000007968, ENSG00000163565, ENSG00000141510	2301	26	19308	2.25915	1	1	0.985829
GOTERM_BP_DIRECT	GO:0048702~embryonic neurocranium morphogenesis	4	0.15534	0.0817397	ENSG00000100714, ENSG00000184634, ENSG00000070614, ENSG00000120254	2301	9	19308	3.72939	1	1	0.985829
GOTERM_BP_DIRECT	GO:0051248~negative regulation of protein metabolic process	4	0.15534	0.0817397	ENSG00000136160, ENSG00000109320, ENSG00000103126, ENSG00000130164	2301	9	19308	3.72939	1	1	0.985829
GOTERM_BP_DIRECT	GO:0090650~cellular response to oxygen-glucose deprivation	4	0.15534	0.0817397	ENSG00000128272, ENSG00000105835, ENSG00000167535, ENSG00000110395	2301	9	19308	3.72939	1	1	0.985829
GOTERM_BP_DIRECT	GO:0051782~negative regulation of cell division	4	0.15534	0.0817397	ENSG00000164066, ENSG00000091651, ENSG00000197299, ENSG00000136997	2301	9	19308	3.72939	1	1	0.985829
GOTERM_BP_DIRECT	GO:1901990~regulation of mitotic cell cycle phase transition	4	0.15534	0.0817397	ENSG00000114670, ENSG00000166851, ENSG00000090447, ENSG00000176208	2301	9	19308	3.72939	1	1	0.985829
GOTERM_BP_DIRECT	GO:0030728~ovulation	4	0.15534	0.0817397	ENSG00000073756, ENSG00000077238, ENSG00000136997, ENSG00000124882	2301	9	19308	3.72939	1	1	0.985829
GOTERM_BP_DIRECT	GO:0071028~nuclear mRNA surveillance	4	0.15534	0.0817397	ENSG00000123737, ENSG00000120699, ENSG00000171824, ENSG00000077348	2301	9	19308	3.72939	1	1	0.985829
GOTERM_BP_DIRECT	GO:0045647~negative regulation of erythrocyte differentiation	4	0.15534	0.0817397	ENSG00000185340, ENSG00000185650, ENSG00000173757, ENSG00000113013	2301	9	19308	3.72939	1	1	0.985829
GOTERM_BP_DIRECT	GO:0035767~endothelial cell chemotaxis	4	0.15534	0.0817397	ENSG00000143545, ENSG00000112715, ENSG00000171680, ENSG00000189403	2301	9	19308	3.72939	1	1	0.985829
GOTERM_BP_DIRECT	GO:0000467~exonucleolytic trimming to generate mature 3'-end of 5.8S rRNA from tricistronic rRNA transcript (SSU-rRNA, 5.8S rRNA, LSU-rRNA)	4	0.15534	0.0817397	ENSG00000123737, ENSG00000120699, ENSG00000171824, ENSG00000130713	2301	9	19308	3.72939	1	1	0.985829
GOTERM_BP_DIRECT	GO:0050847~progesterone receptor signaling pathway	4	0.15534	0.0817397	ENSG00000137693, ENSG00000197122, ENSG00000069869, ENSG00000124496	2301	9	19308	3.72939	1	1	0.985829
GOTERM_BP_DIRECT	GO:0085020~protein K6-linked ubiquitination	4	0.15534	0.0817397	ENSG00000138376, ENSG00000108106, ENSG00000012048, ENSG00000077152	2301	9	19308	3.72939	1	1	0.985829
GOTERM_BP_DIRECT	GO:0070997~neuron death	4	0.15534	0.0817397	ENSG00000105835, ENSG00000097007, ENSG00000166170, ENSG00000110395	2301	9	19308	3.72939	1	1	0.985829
GOTERM_BP_DIRECT	GO:0097400~interleukin-17-mediated signaling pathway	4	0.15534	0.0817397	ENSG00000082512, ENSG00000056972, ENSG00000263528, ENSG00000127191	2301	9	19308	3.72939	1	1	0.985829
GOTERM_BP_DIRECT	GO:0046755~viral budding	4	0.15534	0.0817397	ENSG00000196814, ENSG00000069869, ENSG00000101421, ENSG00000141971	2301	9	19308	3.72939	1	1	0.985829
GOTERM_BP_DIRECT	GO:0060351~cartilage development involved in endochondral bone morphogenesis	4	0.15534	0.0817397	ENSG00000005073, ENSG00000274276, ENSG00000160200, ENSG00000111199	2301	9	19308	3.72939	1	1	0.985829
GOTERM_BP_DIRECT	GO:0007144~female meiosis I	4	0.15534	0.0817397	ENSG00000132016, ENSG00000160207, ENSG00000071539, ENSG00000101224	2301	9	19308	3.72939	1	1	0.985829
GOTERM_BP_DIRECT	GO:0042698~ovulation cycle	4	0.15534	0.0817397	ENSG00000146648, ENSG00000092445, ENSG00000138696, ENSG00000167601	2301	9	19308	3.72939	1	1	0.985829
GOTERM_BP_DIRECT	GO:0031648~protein destabilization	11	0.427184	0.0841682	ENSG00000117597, ENSG00000147889, ENSG00000100219, ENSG00000166851, ENSG00000197122, ENSG00000103811, ENSG00000151876, ENSG00000253729, ENSG00000015133, ENSG00000179262, ENSG00000126368	2301	52	19308	1.77505	1	1	0.985829
GOTERM_BP_DIRECT	GO:0033077~T cell differentiation in thymus	9	0.349515	0.0854376	ENSG00000196839, ENSG00000105810, ENSG00000168685, ENSG00000070495, ENSG00000185650, ENSG00000025770, ENSG00000253729, ENSG00000173757, ENSG00000141510	2301	39	19308	1.93642	1	1	0.985829
GOTERM_BP_DIRECT	GO:0015031~protein transport	63	2.4466	0.0878141	ENSG00000093000, ENSG00000213024, ENSG00000111711, ENSG00000105438, ENSG00000114346, ENSG00000004777, ENSG00000143952, ENSG00000164695, ENSG00000162878, ENSG00000105197, ENSG00000058804, ENSG00000141971, ENSG00000106477, ENSG00000125450, ENSG00000173171, ENSG00000155561, ENSG00000132507, ENSG00000153140, ENSG00000075188, ENSG00000132341, ENSG00000117724, ENSG00000132780, ENSG00000082898, ENSG0000…	2301	439	19308	1.20419	1	1	0.985829
GOTERM_BP_DIRECT	GO:1900182~positive regulation of protein localization to nucleus	8	0.31068	0.0900196	ENSG00000147889, ENSG00000137693, ENSG00000166851, ENSG00000128342, ENSG00000197122, ENSG00000142208, ENSG00000170312, ENSG00000100065	2301	33	19308	2.03421	1	1	0.985829
GOTERM_BP_DIRECT	GO:0006413~translational initiation	11	0.427184	0.0932145	ENSG00000178982, ENSG00000130741, ENSG00000005100, ENSG00000164163, ENSG00000106263, ENSG00000155506, ENSG00000085760, ENSG00000100353, ENSG00000242372, ENSG00000144895, ENSG00000123908	2301	53	19308	1.74156	1	1	0.985829
GOTERM_BP_DIRECT	GO:0050930~induction of positive chemotaxis	5	0.194175	0.0937662	ENSG00000204305, ENSG00000112715, ENSG00000173511, ENSG00000169429, ENSG00000150630	2301	15	19308	2.79704	1	1	0.985829
GOTERM_BP_DIRECT	GO:0002091~negative regulation of receptor internalization	5	0.194175	0.0937662	ENSG00000132535, ENSG00000198720, ENSG00000100599, ENSG00000005448, ENSG00000087053	2301	15	19308	2.79704	1	1	0.985829
GOTERM_BP_DIRECT	GO:0010952~positive regulation of peptidase activity	5	0.194175	0.0937662	ENSG00000188130, ENSG00000105974, ENSG00000077942, ENSG00000103811, ENSG00000115414	2301	15	19308	2.79704	1	1	0.985829
GOTERM_BP_DIRECT	GO:0016446~somatic hypermutation of immunoglobulin genes	5	0.194175	0.0937662	ENSG00000174371, ENSG00000095002, ENSG00000076248, ENSG00000116062, ENSG00000051341	2301	15	19308	2.79704	1	1	0.985829
GOTERM_BP_DIRECT	GO:0033147~negative regulation of intracellular estrogen receptor signaling pathway	5	0.194175	0.0937662	ENSG00000196792, ENSG00000144580, ENSG00000125107, ENSG00000012048, ENSG00000215021	2301	15	19308	2.79704	1	1	0.985829
GOTERM_BP_DIRECT	GO:0006351~transcription, DNA-templated	19	0.737864	0.0941221	ENSG00000076924, ENSG00000183814, ENSG00000105258, ENSG00000138821, ENSG00000066379, ENSG00000104825, ENSG00000116205, ENSG00000170689, ENSG00000205659, ENSG00000128908, ENSG00000137054, ENSG00000180806, ENSG00000101412, ENSG00000130816, ENSG00000178053, ENSG00000145386, ENSG00000126003, ENSG00000123374, ENSG00000102882	2301	109	19308	1.46267	1	1	0.985829
GOTERM_BP_DIRECT	GO:0008340~determination of adult lifespan	6	0.23301	0.0958183	ENSG00000164430, ENSG00000095002, ENSG00000085999, ENSG00000116062, ENSG00000111676, ENSG00000141510	2301	21	19308	2.39747	1	1	0.985829
GOTERM_BP_DIRECT	GO:0032211~negative regulation of telomere maintenance via telomerase	6	0.23301	0.0958183	ENSG00000140451, ENSG00000092199, ENSG00000171824, ENSG00000197122, ENSG00000172795, ENSG00000135486	2301	21	19308	2.39747	1	1	0.985829
GOTERM_BP_DIRECT	GO:0050731~positive regulation of peptidyl-tyrosine phosphorylation	17	0.660194	0.0959954	ENSG00000112715, ENSG00000128342, ENSG00000026508, ENSG00000153064, ENSG00000162407, ENSG00000197122, ENSG00000097007, ENSG00000173511, ENSG00000136244, ENSG00000261371, ENSG00000157873, ENSG00000154237, ENSG00000116584, ENSG00000101126, ENSG00000090339, ENSG00000141510, ENSG00000143575	2301	95	19308	1.50157	1	1	0.985829
GOTERM_BP_DIRECT	GO:0030177~positive regulation of Wnt signaling pathway	9	0.349515	0.0961975	ENSG00000104332, ENSG00000107104, ENSG00000118503, ENSG00000035499, ENSG00000127616, ENSG00000164362, ENSG00000150764, ENSG00000134046, ENSG00000108379	2301	40	19308	1.88801	1	1	0.985829
GOTERM_BP_DIRECT	GO:0051402~neuron apoptotic process	14	0.543689	0.0969011	ENSG00000132688, ENSG00000064393, ENSG00000065361, ENSG00000092445, ENSG00000111676, ENSG00000176720, ENSG00000122966, ENSG00000159593, ENSG00000100644, ENSG00000101126, ENSG00000015475, ENSG00000164830, ENSG00000167601, ENSG00000141510	2301	74	19308	1.58751	1	1	0.985829

## Sheet: GO of up-regulated DEGs
Table S1:GO and KEGG pathway analysis of common down-regulated or up-regulated DEGs between SCC15 and SCC25 after JQ1 addition for 48 h. Biological Processes (BP) of GO analysis for each gene set are shown.
Category	Term	Count	%	PValue	Genes	List Total	Pop Hits	Pop Total	Fold Enrichment	Bonferroni	Benjamini	FDR
GOTERM_BP_DIRECT	GO:0015031~protein transport	124	4.77107	7.1533e-21	ENSG00000051009, ENSG00000104388, ENSG00000103051, ENSG00000152061, ENSG00000112685, ENSG00000157191, ENSG00000080371, ENSG00000145817, ENSG00000100345, ENSG00000213380, ENSG00000092108, ENSG00000163406, ENSG00000152056, ENSG00000197121, ENSG00000111224, ENSG00000029725, ENSG00000172007, ENSG00000047932, ENSG00000138686, ENSG00000115145, ENSG00000156931, ENSG00000265808, ENSG00000103591, ENSG0000…	2285	439	19308	2.38676	4.27552e-17	4.27552e-17	4.22688e-17
GOTERM_BP_DIRECT	GO:0006886~intracellular protein transport	95	3.65525	5.74289e-17	ENSG00000185825, ENSG00000213983, ENSG00000158604, ENSG00000109436, ENSG00000006715, ENSG00000175662, ENSG00000152061, ENSG00000175463, ENSG00000137501, ENSG00000004059, ENSG00000138674, ENSG00000064601, ENSG00000136854, ENSG00000132254, ENSG00000115234, ENSG00000122218, ENSG00000204634, ENSG00000080371, ENSG00000167202, ENSG00000143878, ENSG00000154917, ENSG00000168374, ENSG00000138190, ENSG0000…	2285	328	19308	2.44738	6.6358e-13	1.71626e-13	1.69674e-13
GOTERM_BP_DIRECT	GO:0016192~vesicle-mediated transport	73	2.80877	6.51113e-15	ENSG00000101350, ENSG00000108669, ENSG00000213983, ENSG00000104388, ENSG00000132612, ENSG00000006715, ENSG00000137501, ENSG00000004059, ENSG00000137502, ENSG00000036054, ENSG00000138834, ENSG00000204991, ENSG00000164292, ENSG00000136854, ENSG00000089818, ENSG00000122218, ENSG00000157191, ENSG00000084733, ENSG00000008294, ENSG00000145817, ENSG00000168374, ENSG00000054523, ENSG00000090565, ENSG0000…	2285	234	19308	2.63608	3.91512e-11	1.29723e-11	1.28248e-11
GOTERM_BP_DIRECT	GO:0016567~protein ubiquitination	107	4.11697	7.06752e-10	ENSG00000075975, ENSG00000110429, ENSG00000152503, ENSG00000116525, ENSG00000153558, ENSG00000080802, ENSG00000119402, ENSG00000166233, ENSG00000145495, ENSG00000109670, ENSG00000142546, ENSG00000002746, ENSG00000239305, ENSG00000133398, ENSG00000174943, ENSG00000164068, ENSG00000182670, ENSG00000126107, ENSG00000078967, ENSG00000071537, ENSG00000024048, ENSG00000099804, ENSG00000158828, ENSG0000…	2285	496	19308	1.82286	4.22425e-06	1.05606e-06	1.04405e-06
GOTERM_BP_DIRECT	GO:0000045~autophagosome assembly	28	1.07734	1.25913e-09	ENSG00000157954, ENSG00000177169, ENSG00000179364, ENSG00000112425, ENSG00000070540, ENSG00000171100, ENSG00000110046, ENSG00000117758, ENSG00000175224, ENSG00000174437, ENSG00000066739, ENSG00000188021, ENSG00000151929, ENSG00000166471, ENSG00000140941, ENSG00000126775, ENSG00000034713, ENSG00000126581, ENSG00000023287, ENSG00000075785, ENSG00000164938, ENSG00000135018, ENSG00000138069, ENSG0000…	2285	65	19308	3.63995	7.52579e-06	1.50516e-06	1.48804e-06
GOTERM_BP_DIRECT	GO:0006888~ER to Golgi vesicle-mediated transport	42	1.61601	1.84813e-09	ENSG00000185825, ENSG00000104388, ENSG00000158604, ENSG00000249915, ENSG00000165280, ENSG00000115216, ENSG00000153339, ENSG00000138674, ENSG00000154305, ENSG00000075790, ENSG00000136874, ENSG00000122218, ENSG00000170348, ENSG00000117153, ENSG00000145817, ENSG00000136152, ENSG00000168374, ENSG00000100568, ENSG00000092108, ENSG00000168538, ENSG00000182400, ENSG00000162236, ENSG00000075826, ENSG0000…	2285	130	19308	2.72996	1.10462e-05	1.84104e-06	1.8201e-06
GOTERM_BP_DIRECT	GO:0030433~ubiquitin-dependent ERAD pathway	31	1.19277	4.09237e-09	ENSG00000135506, ENSG00000135924, ENSG00000051108, ENSG00000128590, ENSG00000044574, ENSG00000165280, ENSG00000110344, ENSG00000005486, ENSG00000116661, ENSG00000188021, ENSG00000162298, ENSG00000145495, ENSG00000147475, ENSG00000163527, ENSG00000108588, ENSG00000144224, ENSG00000182446, ENSG00000134109, ENSG00000239305, ENSG00000197860, ENSG00000137414, ENSG00000111885, ENSG00000068912, ENSG0000…	2285	81	19308	3.23391	2.44598e-05	3.4943e-06	3.45455e-06
GOTERM_BP_DIRECT	GO:0042147~retrograde transport, endosome to Golgi	31	1.19277	7.9605e-09	ENSG00000135968, ENSG00000028528, ENSG00000175463, ENSG00000122490, ENSG00000036054, ENSG00000103978, ENSG00000164292, ENSG00000153214, ENSG00000102805, ENSG00000141252, ENSG00000154917, ENSG00000205302, ENSG00000008294, ENSG00000122958, ENSG00000100568, ENSG00000162236, ENSG00000107036, ENSG00000106636, ENSG00000075785, ENSG00000129493, ENSG00000175931, ENSG00000151502, ENSG00000069329, ENSG0000…	2285	83	19308	3.15598	4.75788e-05	5.94749e-06	5.87982e-06
GOTERM_BP_DIRECT	GO:0006511~ubiquitin-dependent protein catabolic process	68	2.61639	1.38052e-08	ENSG00000001629, ENSG00000110344, ENSG00000119682, ENSG00000151893, ENSG00000066427, ENSG00000119048, ENSG00000080802, ENSG00000111671, ENSG00000166233, ENSG00000188021, ENSG00000118518, ENSG00000130706, ENSG00000101752, ENSG00000145332, ENSG00000182446, ENSG00000108344, ENSG00000102471, ENSG00000077721, ENSG00000170185, ENSG00000159202, ENSG00000135018, ENSG00000135655, ENSG00000115464, ENSG0000…	2285	282	19308	2.03756	8.251e-05	9.16816e-06	9.06385e-06
GOTERM_BP_DIRECT	GO:0006914~autophagy	43	1.65448	7.04632e-08	ENSG00000177169, ENSG00000132612, ENSG00000070540, ENSG00000116209, ENSG00000196663, ENSG00000165280, ENSG00000137942, ENSG00000110046, ENSG00000068903, ENSG00000119541, ENSG00000132254, ENSG00000138279, ENSG00000139644, ENSG00000132356, ENSG00000197969, ENSG00000141452, ENSG00000038532, ENSG00000168397, ENSG00000103657, ENSG00000140941, ENSG00000034713, ENSG00000165943, ENSG00000147457, ENSG0000…	2285	151	19308	2.40626	0.00042107	4.21159e-05	4.16367e-05
GOTERM_BP_DIRECT	GO:0006468~protein phosphorylation	99	3.80916	2.99587e-07	ENSG00000135605, ENSG00000159256, ENSG00000180370, ENSG00000082701, ENSG00000175224, ENSG00000006432, ENSG00000143479, ENSG00000141736, ENSG00000162434, ENSG00000107643, ENSG00000126581, ENSG00000176444, ENSG00000104936, ENSG00000198612, ENSG00000157106, ENSG00000113240, ENSG00000136021, ENSG00000183087, ENSG00000101782, ENSG00000140992, ENSG00000104375, ENSG00000196182, ENSG00000104205, ENSG0000…	2285	501	19308	1.66974	0.00178903	0.000162784	0.000160932
GOTERM_BP_DIRECT	GO:0016241~regulation of macroautophagy	22	0.846479	4.73711e-07	ENSG00000126581, ENSG00000107643, ENSG00000177169, ENSG00000116903, ENSG00000113732, ENSG00000151502, ENSG00000069329, ENSG00000111640, ENSG00000159720, ENSG00000135018, ENSG00000114573, ENSG00000117410, ENSG00000147416, ENSG00000188021, ENSG00000122958, ENSG00000159363, ENSG00000182473, ENSG00000164305, ENSG00000100554, ENSG00000033627, ENSG00000126775, ENSG00000126247	2285	55	19308	3.37996	0.00282737	0.000235948	0.000233263
GOTERM_BP_DIRECT	GO:0030036~actin cytoskeleton organization	45	1.73144	2.46169e-06	ENSG00000134318, ENSG00000186716, ENSG00000175183, ENSG00000197694, ENSG00000196588, ENSG00000204991, ENSG00000132376, ENSG00000132254, ENSG00000136238, ENSG00000066427, ENSG00000196923, ENSG00000110880, ENSG00000138594, ENSG00000172725, ENSG00000007168, ENSG00000149930, ENSG00000070759, ENSG00000124313, ENSG00000100266, ENSG00000112419, ENSG00000154553, ENSG00000128487, ENSG00000178104, ENSG0000…	2285	182	19308	2.08926	0.0146058	0.00113181	0.00111893
GOTERM_BP_DIRECT	GO:0008333~endosome to lysosome transport	19	0.73105	5.89547e-06	ENSG00000051009, ENSG00000006715, ENSG00000182606, ENSG00000215305, ENSG00000075785, ENSG00000134243, ENSG00000171100, ENSG00000168172, ENSG00000151445, ENSG00000115993, ENSG00000166971, ENSG00000143878, ENSG00000136021, ENSG00000038532, ENSG00000166887, ENSG00000143553, ENSG00000126775, ENSG00000074319, ENSG00000124333	2285	49	19308	3.27649	0.0346237	0.00251695	0.00248831
GOTERM_BP_DIRECT	GO:0007030~Golgi organization	35	1.34667	7.75361e-06	ENSG00000178950, ENSG00000104388, ENSG00000158604, ENSG00000103051, ENSG00000155252, ENSG00000176018, ENSG00000137502, ENSG00000153339, ENSG00000133103, ENSG00000136874, ENSG00000170348, ENSG00000141551, ENSG00000164597, ENSG00000102606, ENSG00000154917, ENSG00000143515, ENSG00000136152, ENSG00000213380, ENSG00000183597, ENSG00000168538, ENSG00000182446, ENSG00000129472, ENSG00000132549, ENSG0000…	2285	132	19308	2.2405	0.045286	0.00306316	0.00302832
GOTERM_BP_DIRECT	GO:0006897~endocytosis	48	1.84686	8.19987e-06	ENSG00000103197, ENSG00000024422, ENSG00000136878, ENSG00000112964, ENSG00000152061, ENSG00000115977, ENSG00000196586, ENSG00000137942, ENSG00000134013, ENSG00000110047, ENSG00000154305, ENSG00000137642, ENSG00000177548, ENSG00000089818, ENSG00000157191, ENSG00000167202, ENSG00000205302, ENSG00000105290, ENSG00000187239, ENSG00000127527, ENSG00000101752, ENSG00000070018, ENSG00000079805, ENSG0000…	2285	208	19308	1.94997	0.0478292	0.00306316	0.00302832
GOTERM_BP_DIRECT	GO:0070085~glycosylation	11	0.42324	9.35103e-06	ENSG00000027847, ENSG00000166685, ENSG00000102805, ENSG00000121578, ENSG00000164597, ENSG00000103051, ENSG00000136152, ENSG00000213380, ENSG00000133103, ENSG00000086062, ENSG00000135775	2285	18	19308	5.16382	0.0543581	0.00328771	0.00325031
GOTERM_BP_DIRECT	GO:0050790~regulation of catalytic activity	74	2.84725	1.13311e-05	ENSG00000133789, ENSG00000108669, ENSG00000073711, ENSG00000182957, ENSG00000073350, ENSG00000177606, ENSG00000038274, ENSG00000175984, ENSG00000137145, ENSG00000134313, ENSG00000131089, ENSG00000064601, ENSG00000155657, ENSG00000196914, ENSG00000275832, ENSG00000008256, ENSG00000108061, ENSG00000103657, ENSG00000134909, ENSG00000124313, ENSG00000108262, ENSG00000221978, ENSG00000101199, ENSG0000…	2285	375	19308	1.66745	0.0654838	0.00355173	0.00351132
GOTERM_BP_DIRECT	GO:0006895~Golgi to endosome transport	10	0.384763	1.1446e-05	ENSG00000129003, ENSG00000197969, ENSG00000085832, ENSG00000204070, ENSG00000142197, ENSG00000134243, ENSG00000119396, ENSG00000083097, ENSG00000061987, ENSG00000107862	2285	15	19308	5.63326	0.0661255	0.00355173	0.00351132
GOTERM_BP_DIRECT	GO:0008104~protein localization	37	1.42362	1.22502e-05	ENSG00000103197, ENSG00000177169, ENSG00000116903, ENSG00000198589, ENSG00000164190, ENSG00000138758, ENSG00000044115, ENSG00000155876, ENSG00000197969, ENSG00000165389, ENSG00000144426, ENSG00000100503, ENSG00000102401, ENSG00000182149, ENSG00000125124, ENSG00000129474, ENSG00000198231, ENSG00000108953, ENSG00000147044, ENSG00000129493, ENSG00000178209, ENSG00000150457, ENSG00000110651, ENSG0000…	2285	146	19308	2.14141	0.0706033	0.00355173	0.00351132
GOTERM_BP_DIRECT	GO:0046854~phosphatidylinositol phosphorylation	20	0.769527	1.24789e-05	ENSG00000122591, ENSG00000241973, ENSG00000155252, ENSG00000166908, ENSG00000068745, ENSG00000168890, ENSG00000132294, ENSG00000068724, ENSG00000133731, ENSG00000155744, ENSG00000157106, ENSG00000084710, ENSG00000274211, ENSG00000011405, ENSG00000051382, ENSG00000117461, ENSG00000186111, ENSG00000185338, ENSG00000145675, ENSG00000104331	2285	56	19308	3.01782	0.0718731	0.00355173	0.00351132
GOTERM_BP_DIRECT	GO:0008089~anterograde axonal transport	14	0.538669	1.45792e-05	ENSG00000132842, ENSG00000134108, ENSG00000196072, ENSG00000101350, ENSG00000065000, ENSG00000131437, ENSG00000197912, ENSG00000142168, ENSG00000173805, ENSG00000080371, ENSG00000186222, ENSG00000054523, ENSG00000103723, ENSG00000143553	2285	30	19308	3.94328	0.0834515	0.00396089	0.00391583
GOTERM_BP_DIRECT	GO:0043065~positive regulation of apoptotic process	66	2.53944	1.8625e-05	ENSG00000109919, ENSG00000099860, ENSG00000177606, ENSG00000006432, ENSG00000166311, ENSG00000148926, ENSG00000102606, ENSG00000143878, ENSG00000105270, ENSG00000163602, ENSG00000140961, ENSG00000165943, ENSG00000107643, ENSG00000003756, ENSG00000100292, ENSG00000164938, ENSG00000159202, ENSG00000265972, ENSG00000174307, ENSG00000091409, ENSG00000118689, ENSG00000119977, ENSG00000120885, ENSG0000…	2285	328	19308	1.70028	0.10535	0.00484008	0.00478501
GOTERM_BP_DIRECT	GO:0007035~vacuolar acidification	12	0.461716	2.1467e-05	ENSG00000117410, ENSG00000071553, ENSG00000172869, ENSG00000147416, ENSG00000113732, ENSG00000104093, ENSG00000100554, ENSG00000182220, ENSG00000159720, ENSG00000033627, ENSG00000128524, ENSG00000114573	2285	23	19308	4.40864	0.120419	0.00508292	0.00502509
GOTERM_BP_DIRECT	GO:0007029~endoplasmic reticulum organization	17	0.654098	2.23862e-05	ENSG00000178950, ENSG00000148396, ENSG00000136816, ENSG00000138674, ENSG00000058262, ENSG00000154305, ENSG00000115255, ENSG00000115310, ENSG00000144567, ENSG00000113163, ENSG00000142197, ENSG00000095209, ENSG00000169905, ENSG00000144320, ENSG00000141699, ENSG00000083097, ENSG00000075826	2285	44	19308	3.26473	0.125238	0.00508292	0.00502509
GOTERM_BP_DIRECT	GO:0032456~endocytic recycling	21	0.808003	2.27738e-05	ENSG00000157538, ENSG00000024422, ENSG00000076201, ENSG00000069329, ENSG00000151458, ENSG00000117758, ENSG00000119396, ENSG00000110047, ENSG00000131242, ENSG00000114331, ENSG00000115234, ENSG00000085832, ENSG00000141252, ENSG00000122958, ENSG00000148158, ENSG00000125633, ENSG00000090565, ENSG00000164877, ENSG00000164715, ENSG00000166887, ENSG00000149823	2285	63	19308	2.81663	0.127263	0.00508292	0.00502509
GOTERM_BP_DIRECT	GO:0016236~macroautophagy	22	0.846479	2.29612e-05	ENSG00000126581, ENSG00000177169, ENSG00000132612, ENSG00000100292, ENSG00000006715, ENSG00000160948, ENSG00000165280, ENSG00000119541, ENSG00000135018, ENSG00000115145, ENSG00000131475, ENSG00000139112, ENSG00000165861, ENSG00000188554, ENSG00000161011, ENSG00000168397, ENSG00000100568, ENSG00000140941, ENSG00000100330, ENSG00000126775, ENSG00000034713, ENSG00000074319	2285	68	19308	2.73379	0.128239	0.00508292	0.00502509
GOTERM_BP_DIRECT	GO:0016477~cell migration	56	2.15467	2.60389e-05	ENSG00000182957, ENSG00000106009, ENSG00000172037, ENSG00000164292, ENSG00000044115, ENSG00000173801, ENSG00000171862, ENSG00000088812, ENSG00000173517, ENSG00000143878, ENSG00000168374, ENSG00000149930, ENSG00000109079, ENSG00000155366, ENSG00000177697, ENSG00000156299, ENSG00000108819, ENSG00000069702, ENSG00000174943, ENSG00000118523, ENSG00000011405, ENSG00000051382, ENSG00000062598, ENSG0000…	2285	267	19308	1.77226	0.14413	0.00555837	0.00549514
GOTERM_BP_DIRECT	GO:0016239~positive regulation of macroautophagy	14	0.538669	3.36453e-05	ENSG00000183735, ENSG00000103197, ENSG00000100292, ENSG00000153130, ENSG00000130766, ENSG00000104765, ENSG00000112425, ENSG00000158828, ENSG00000080546, ENSG00000196235, ENSG00000135341, ENSG00000168092, ENSG00000149212, ENSG00000165699	2285	32	19308	3.69683	0.18217	0.00693441	0.00685552
GOTERM_BP_DIRECT	GO:0048208~COPII vesicle coating	12	0.461716	3.53973e-05	ENSG00000119414, ENSG00000170348, ENSG00000141551, ENSG00000007255, ENSG00000117153, ENSG00000148396, ENSG00000249915, ENSG00000170043, ENSG00000196655, ENSG00000153339, ENSG00000168538, ENSG00000171853	2285	24	19308	4.22495	0.19069	0.00705233	0.0069721
GOTERM_BP_DIRECT	GO:0032436~positive regulation of proteasomal ubiquitin-dependent protein catabolic process	24	0.923432	4.29216e-05	ENSG00000135924, ENSG00000103363, ENSG00000001629, ENSG00000165280, ENSG00000082701, ENSG00000068903, ENSG00000177479, ENSG00000154447, ENSG00000138686, ENSG00000080815, ENSG00000141551, ENSG00000166233, ENSG00000120885, ENSG00000204389, ENSG00000001084, ENSG00000204388, ENSG00000153071, ENSG00000013561, ENSG00000187866, ENSG00000105373, ENSG00000103266, ENSG00000033800, ENSG00000160445, ENSG0000…	2285	81	19308	2.50367	0.226282	0.00827557	0.00818142
GOTERM_BP_DIRECT	GO:0047496~vesicle transport along microtubule	10	0.384763	4.45073e-05	ENSG00000173805, ENSG00000007168, ENSG00000182606, ENSG00000170759, ENSG00000197386, ENSG00000138069, ENSG00000166579, ENSG00000135127, ENSG00000115993, ENSG00000124333	2285	17	19308	4.97052	0.233581	0.00831314	0.00821856
GOTERM_BP_DIRECT	GO:0007042~lysosomal lumen acidification	11	0.42324	5.38319e-05	ENSG00000117410, ENSG00000071553, ENSG00000030582, ENSG00000102805, ENSG00000100554, ENSG00000182220, ENSG00000033627, ENSG00000106460, ENSG00000128524, ENSG00000143553, ENSG00000114573	2285	21	19308	4.42613	0.275129	0.0097501	0.00963917
GOTERM_BP_DIRECT	GO:0048388~endosomal lumen acidification	9	0.346287	5.87603e-05	ENSG00000117410, ENSG00000071553, ENSG00000178301, ENSG00000100554, ENSG00000182220, ENSG00000033627, ENSG00000109572, ENSG00000128524, ENSG00000114573	2285	14	19308	5.43207	0.296172	0.0103297	0.0102122
GOTERM_BP_DIRECT	GO:0034976~response to endoplasmic reticulum stress	24	0.923432	7.99215e-05	ENSG00000135506, ENSG00000051108, ENSG00000185825, ENSG00000148572, ENSG00000148396, ENSG00000128590, ENSG00000023318, ENSG00000135018, ENSG00000139324, ENSG00000174437, ENSG00000164463, ENSG00000120686, ENSG00000113163, ENSG00000184381, ENSG00000182087, ENSG00000153094, ENSG00000140943, ENSG00000185624, ENSG00000145675, ENSG00000167658, ENSG00000149428, ENSG00000087074, ENSG00000109501, ENSG0000…	2285	84	19308	2.41425	0.379798	0.0136483	0.013493
GOTERM_BP_DIRECT	GO:0006891~intra-Golgi vesicle-mediated transport	14	0.538669	0.00010155	ENSG00000105669, ENSG00000134265, ENSG00000133103, ENSG00000172007, ENSG00000135775, ENSG00000122218, ENSG00000166685, ENSG00000164597, ENSG00000154917, ENSG00000136152, ENSG00000100568, ENSG00000213380, ENSG00000073969, ENSG00000034713	2285	35	19308	3.37996	0.455015	0.0168602	0.0166684
GOTERM_BP_DIRECT	GO:1904380~endoplasmic reticulum mannose trimming	9	0.346287	0.000112834	ENSG00000134109, ENSG00000239305, ENSG00000162298, ENSG00000159461, ENSG00000116406, ENSG00000145495, ENSG00000088298, ENSG00000170881, ENSG00000177239	2285	15	19308	5.06993	0.490561	0.0182272	0.0180199
GOTERM_BP_DIRECT	GO:0090148~membrane fission	15	0.577145	0.000117006	ENSG00000180104, ENSG00000132612, ENSG00000160948, ENSG00000116903, ENSG00000112685, ENSG00000119541, ENSG00000115145, ENSG00000110880, ENSG00000131475, ENSG00000182473, ENSG00000138190, ENSG00000144036, ENSG00000147457, ENSG00000255112, ENSG00000074319	2285	40	19308	3.16871	0.503109	0.0184038	0.0181944
GOTERM_BP_DIRECT	GO:0035556~intracellular signal transduction	81	3.11658	0.000129215	ENSG00000135605, ENSG00000186716, ENSG00000109756, ENSG00000075413, ENSG00000180370, ENSG00000105519, ENSG00000114302, ENSG00000082701, ENSG00000170776, ENSG00000111671, ENSG00000102606, ENSG00000149930, ENSG00000141736, ENSG00000161664, ENSG00000163328, ENSG00000124198, ENSG00000162434, ENSG00000145214, ENSG00000107643, ENSG00000154310, ENSG00000100292, ENSG00000197562, ENSG00000136828, ENSG0000…	2285	451	19308	1.51761	0.538081	0.019455	0.0192336
GOTERM_BP_DIRECT	GO:0006893~Golgi to plasma membrane transport	12	0.461716	0.000131829	ENSG00000138175, ENSG00000084733, ENSG00000116903, ENSG00000125633, ENSG00000138190, ENSG00000112685, ENSG00000124198, ENSG00000029725, ENSG00000047932, ENSG00000144036, ENSG00000103365, ENSG00000079805	2285	27	19308	3.75551	0.545244	0.019455	0.0192336
GOTERM_BP_DIRECT	GO:0006986~response to unfolded protein	18	0.692574	0.000133454	ENSG00000135924, ENSG00000051108, ENSG00000134109, ENSG00000102580, ENSG00000162616, ENSG00000128590, ENSG00000136816, ENSG00000116406, ENSG00000164070, ENSG00000023318, ENSG00000132002, ENSG00000139644, ENSG00000164463, ENSG00000204389, ENSG00000088298, ENSG00000163527, ENSG00000086061, ENSG00000144224	2285	55	19308	2.76542	0.54964	0.019455	0.0192336
GOTERM_BP_DIRECT	GO:0007568~aging	42	1.61601	0.00014735	ENSG00000178971, ENSG00000070961, ENSG00000177885, ENSG00000023572, ENSG00000134013, ENSG00000142082, ENSG00000177606, ENSG00000044115, ENSG00000171862, ENSG00000148180, ENSG00000173402, ENSG00000167720, ENSG00000142168, ENSG00000148926, ENSG00000167468, ENSG00000035862, ENSG00000001084, ENSG00000161048, ENSG00000100983, ENSG00000130707, ENSG00000140521, ENSG00000233276, ENSG00000181019, ENSG0000…	2285	194	19308	1.82936	0.58554	0.0209694	0.0207308
GOTERM_BP_DIRECT	GO:0050821~protein stabilization	46	1.76991	0.000160174	ENSG00000198561, ENSG00000154144, ENSG00000158828, ENSG00000115977, ENSG00000159256, ENSG00000117758, ENSG00000138834, ENSG00000136854, ENSG00000171862, ENSG00000119048, ENSG00000115310, ENSG00000080371, ENSG00000162298, ENSG00000151929, ENSG00000136152, ENSG00000161202, ENSG00000109670, ENSG00000185896, ENSG00000105373, ENSG00000145675, ENSG00000099817, ENSG00000180228, ENSG00000105401, ENSG0000…	2285	220	19308	1.7668	0.616124	0.0222642	0.0220109
GOTERM_BP_DIRECT	GO:0032418~lysosome localization	13	0.500192	0.000168369	ENSG00000134108, ENSG00000196072, ENSG00000225190, ENSG00000105649, ENSG00000119812, ENSG00000008294, ENSG00000170759, ENSG00000254901, ENSG00000166275, ENSG00000100345, ENSG00000106460, ENSG00000166579, ENSG00000143553	2285	32	19308	3.43277	0.634478	0.022364	0.0221096
GOTERM_BP_DIRECT	GO:0090630~activation of GTPase activity	31	1.19277	0.000168376	ENSG00000186716, ENSG00000109436, ENSG00000111859, ENSG00000152061, ENSG00000175463, ENSG00000170471, ENSG00000174373, ENSG00000105738, ENSG00000136111, ENSG00000110880, ENSG00000204634, ENSG00000167202, ENSG00000145979, ENSG00000180900, ENSG00000166579, ENSG00000141258, ENSG00000011454, ENSG00000108239, ENSG00000133138, ENSG00000156299, ENSG00000099992, ENSG00000213977, ENSG00000167193, ENSG0000…	2285	128	19308	2.04646	0.634492	0.022364	0.0221096
GOTERM_BP_DIRECT	GO:0006605~protein targeting	15	0.577145	0.000212043	ENSG00000135506, ENSG00000105401, ENSG00000213463, ENSG00000152056, ENSG00000108953, ENSG00000182606, ENSG00000197892, ENSG00000005893, ENSG00000115993, ENSG00000137642, ENSG00000170027, ENSG00000173805, ENSG00000081014, ENSG00000123159, ENSG00000164924	2285	42	19308	3.01782	0.718469	0.0269655	0.0266587
GOTERM_BP_DIRECT	GO:0097352~autophagosome maturation	15	0.577145	0.000212043	ENSG00000126581, ENSG00000132612, ENSG00000215305, ENSG00000165280, ENSG00000005893, ENSG00000119541, ENSG00000135018, ENSG00000136874, ENSG00000271601, ENSG00000140941, ENSG00000143553, ENSG00000126775, ENSG00000147457, ENSG00000255112, ENSG00000074319	2285	42	19308	3.01782	0.718469	0.0269655	0.0266587
GOTERM_BP_DIRECT	GO:0007041~lysosomal transport	10	0.384763	0.000220524	ENSG00000030582, ENSG00000165102, ENSG00000141252, ENSG00000204389, ENSG00000003393, ENSG00000159363, ENSG00000106460, ENSG00000149823, ENSG00000197081, ENSG00000197746	2285	20	19308	4.22495	0.732388	0.0274598	0.0271474
GOTERM_BP_DIRECT	GO:0072659~protein localization to plasma membrane	36	1.38515	0.000247149	ENSG00000172270, ENSG00000134318, ENSG00000178950, ENSG00000024422, ENSG00000109756, ENSG00000179364, ENSG00000122591, ENSG00000168890, ENSG00000132294, ENSG00000110047, ENSG00000068724, ENSG00000137145, ENSG00000132376, ENSG00000173801, ENSG00000136854, ENSG00000084710, ENSG00000084733, ENSG00000144746, ENSG00000070018, ENSG00000154310, ENSG00000148396, ENSG00000197562, ENSG00000130702, ENSG0000…	2285	161	19308	1.88942	0.771768	0.0300895	0.0297471
GOTERM_BP_DIRECT	GO:0006470~protein dephosphorylation	35	1.34667	0.00025171	ENSG00000073711, ENSG00000107758, ENSG00000112425, ENSG00000178397, ENSG00000076201, ENSG00000066027, ENSG00000171100, ENSG00000132670, ENSG00000171862, ENSG00000111110, ENSG00000138032, ENSG00000164332, ENSG00000060069, ENSG00000144724, ENSG00000054148, ENSG00000276023, ENSG00000070778, ENSG00000100241, ENSG00000155367, ENSG00000105568, ENSG00000196396, ENSG00000105426, ENSG00000163629, ENSG0000…	2285	155	19308	1.90804	0.777908	0.0300895	0.0297471
GOTERM_BP_DIRECT	GO:0006892~post-Golgi vesicle-mediated transport	9	0.346287	0.000342486	ENSG00000138175, ENSG00000092531, ENSG00000134243, ENSG00000183155, ENSG00000092108, ENSG00000140497, ENSG00000107862, ENSG00000079805, ENSG00000137642	2285	17	19308	4.47347	0.870929	0.0386032	0.038164
GOTERM_BP_DIRECT	GO:0000423~macromitophagy	10	0.384763	0.000345543	ENSG00000126581, ENSG00000161011, ENSG00000158828, ENSG00000147162, ENSG00000168397, ENSG00000198589, ENSG00000175224, ENSG00000140941, ENSG00000132254, ENSG00000126775	2285	21	19308	4.02376	0.873266	0.0386032	0.038164
GOTERM_BP_DIRECT	GO:0036092~phosphatidylinositol-3-phosphate biosynthetic process	10	0.384763	0.000345543	ENSG00000159082, ENSG00000126581, ENSG00000115020, ENSG00000040933, ENSG00000011405, ENSG00000117461, ENSG00000051382, ENSG00000112367, ENSG00000149311, ENSG00000126775	2285	21	19308	4.02376	0.873266	0.0386032	0.038164
GOTERM_BP_DIRECT	GO:0045732~positive regulation of protein catabolic process	24	0.923432	0.000348766	ENSG00000002746, ENSG00000028528, ENSG00000073711, ENSG00000160948, ENSG00000075785, ENSG00000165280, ENSG00000069329, ENSG00000007944, ENSG00000119682, ENSG00000082701, ENSG00000104904, ENSG00000137642, ENSG00000158290, ENSG00000164463, ENSG00000168397, ENSG00000265808, ENSG00000123124, ENSG00000144560, ENSG00000131507, ENSG00000163659, ENSG00000073969, ENSG00000180304, ENSG00000144357, ENSG0000…	2285	92	19308	2.20432	0.875685	0.0386032	0.038164
GOTERM_BP_DIRECT	GO:0042149~cellular response to glucose starvation	17	0.654098	0.000357746	ENSG00000154059, ENSG00000126581, ENSG00000198198, ENSG00000130766, ENSG00000044574, ENSG00000080546, ENSG00000170145, ENSG00000113742, ENSG00000132356, ENSG00000118689, ENSG00000117394, ENSG00000181929, ENSG00000149212, ENSG00000100330, ENSG00000103257, ENSG00000126775, ENSG00000070669	2285	54	19308	2.66015	0.882184	0.0388772	0.0384349
GOTERM_BP_DIRECT	GO:0000301~retrograde transport, vesicle recycling within Golgi	7	0.269334	0.000373999	ENSG00000166685, ENSG00000164597, ENSG00000103051, ENSG00000136152, ENSG00000213380, ENSG00000133103, ENSG00000135775	2285	10	19308	5.91492	0.893094	0.0399177	0.0394636
GOTERM_BP_DIRECT	GO:0045773~positive regulation of axon extension	13	0.500192	0.000443317	ENSG00000131711, ENSG00000273749, ENSG00000112658, ENSG00000138623, ENSG00000136279, ENSG00000110321, ENSG00000198910, ENSG00000247596, ENSG00000187164, ENSG00000007168, ENSG00000008086, ENSG00000203879, ENSG00000166579	2285	35	19308	3.13853	0.92937	0.0450917	0.0445787
GOTERM_BP_DIRECT	GO:0006904~vesicle docking involved in exocytosis	13	0.500192	0.000443317	ENSG00000180104, ENSG00000106636, ENSG00000116903, ENSG00000105649, ENSG00000137501, ENSG00000112685, ENSG00000136854, ENSG00000116266, ENSG00000084733, ENSG00000100568, ENSG00000182473, ENSG00000138190, ENSG00000144036	2285	35	19308	3.13853	0.92937	0.0450917	0.0445787
GOTERM_BP_DIRECT	GO:0016197~endosomal transport	20	0.769527	0.000445108	ENSG00000134108, ENSG00000196072, ENSG00000242802, ENSG00000073921, ENSG00000024422, ENSG00000132612, ENSG00000215305, ENSG00000110047, ENSG00000119541, ENSG00000110880, ENSG00000115234, ENSG00000136051, ENSG00000085832, ENSG00000084733, ENSG00000161011, ENSG00000038532, ENSG00000003393, ENSG00000127527, ENSG00000125843, ENSG00000100284	2285	71	19308	2.38025	0.930122	0.0450917	0.0445787
GOTERM_BP_DIRECT	GO:0006336~DNA replication-independent nucleosome assembly	11	0.42324	0.000463875	ENSG00000197837, ENSG00000158406, ENSG00000276180, ENSG00000276966, ENSG00000118900, ENSG00000085224, ENSG00000163041, ENSG00000099991, ENSG00000270882, ENSG00000132475, ENSG00000273542	2285	26	19308	3.57495	0.93754	0.0462096	0.0456839
GOTERM_BP_DIRECT	GO:0043161~proteasome-mediated ubiquitin-dependent protein catabolic process	43	1.65448	0.00047361	ENSG00000135924, ENSG00000104343, ENSG00000076604, ENSG00000099804, ENSG00000180233, ENSG00000162923, ENSG00000112425, ENSG00000197111, ENSG00000175166, ENSG00000214655, ENSG00000171100, ENSG00000165280, ENSG00000119682, ENSG00000113851, ENSG00000082701, ENSG00000068903, ENSG00000066427, ENSG00000119048, ENSG00000111671, ENSG00000008018, ENSG00000168159, ENSG00000168036, ENSG00000159352, ENSG0000…	2285	211	19308	1.72202	0.941072	0.046406	0.045878
GOTERM_BP_DIRECT	GO:0000209~protein polyubiquitination	37	1.42362	0.000492761	ENSG00000104343, ENSG00000075975, ENSG00000107854, ENSG00000099804, ENSG00000133606, ENSG00000001629, ENSG00000113558, ENSG00000181481, ENSG00000110344, ENSG00000119682, ENSG00000119048, ENSG00000166971, ENSG00000166233, ENSG00000198919, ENSG00000168036, ENSG00000185651, ENSG00000123124, ENSG00000109654, ENSG00000141279, ENSG00000134900, ENSG00000002746, ENSG00000173273, ENSG00000077721, ENSG0000…	2285	173	19308	1.8072	0.947448	0.0475038	0.0469633
GOTERM_BP_DIRECT	GO:0034497~protein localization to pre-autophagosomal structure	9	0.346287	0.000552745	ENSG00000157954, ENSG00000179364, ENSG00000070540, ENSG00000168397, ENSG00000198589, ENSG00000175224, ENSG00000153339, ENSG00000132254, ENSG00000136874	2285	18	19308	4.22495	0.963289	0.0516212	0.0510339
GOTERM_BP_DIRECT	GO:0031396~regulation of protein ubiquitination	9	0.346287	0.000552745	ENSG00000135924, ENSG00000051108, ENSG00000116661, ENSG00000204389, ENSG00000112425, ENSG00000204388, ENSG00000158828, ENSG00000135018, ENSG00000043093	2285	18	19308	4.22495	0.963289	0.0516212	0.0510339
GOTERM_BP_DIRECT	GO:0006661~phosphatidylinositol biosynthetic process	15	0.577145	0.000609797	ENSG00000241973, ENSG00000155252, ENSG00000112367, ENSG00000171100, ENSG00000132376, ENSG00000171862, ENSG00000133731, ENSG00000198825, ENSG00000159082, ENSG00000115020, ENSG00000040933, ENSG00000011405, ENSG00000186111, ENSG00000163624, ENSG00000100330	2285	46	19308	2.7554	0.973901	0.0560732	0.0554353
GOTERM_BP_DIRECT	GO:0043547~positive regulation of GTPase activity	39	1.50058	0.000703423	ENSG00000103197, ENSG00000186716, ENSG00000115839, ENSG00000109756, ENSG00000152061, ENSG00000174373, ENSG00000179387, ENSG00000082701, ENSG00000130396, ENSG00000138698, ENSG00000102606, ENSG00000145979, ENSG00000161202, ENSG00000141736, ENSG00000162552, ENSG00000166579, ENSG00000166974, ENSG00000141258, ENSG00000100485, ENSG00000011454, ENSG00000107036, ENSG00000073921, ENSG00000150093, ENSG0000…	2285	189	19308	1.74363	0.985092	0.0637025	0.0629777
GOTERM_BP_DIRECT	GO:0006879~cellular iron ion homeostasis	17	0.654098	0.000856903	ENSG00000071553, ENSG00000100292, ENSG00000159720, ENSG00000072274, ENSG00000068724, ENSG00000122729, ENSG00000135766, ENSG00000266412, ENSG00000114573, ENSG00000136381, ENSG00000142168, ENSG00000167996, ENSG00000159363, ENSG00000131507, ENSG00000141646, ENSG00000210082, ENSG00000087086	2285	58	19308	2.47669	0.994047	0.0754097	0.0745518
GOTERM_BP_DIRECT	GO:0099022~vesicle tethering	8	0.307811	0.000870549	ENSG00000167632, ENSG00000007255, ENSG00000170043, ENSG00000196655, ENSG00000153339, ENSG00000182400, ENSG00000168538, ENSG00000171853	2285	15	19308	4.50661	0.994514	0.0754097	0.0745518
GOTERM_BP_DIRECT	GO:1903543~positive regulation of exosomal secretion	8	0.307811	0.000870549	ENSG00000132612, ENSG00000075785, ENSG00000159363, ENSG00000119541, ENSG00000137575, ENSG00000124145, ENSG00000170248, ENSG00000074319	2285	15	19308	4.50661	0.994514	0.0754097	0.0745518
GOTERM_BP_DIRECT	GO:0097201~negative regulation of transcription from RNA polymerase II promoter in response to stress	5	0.192382	0.00088449	ENSG00000154059, ENSG00000151929, ENSG00000204389, ENSG00000082641, ENSG00000132002	2285	5	19308	8.44989	0.994953	0.0755228	0.0746636
GOTERM_BP_DIRECT	GO:0006334~nucleosome assembly	32	1.23124	0.00104384	ENSG00000158406, ENSG00000127483, ENSG00000180596, ENSG00000276180, ENSG00000132475, ENSG00000197903, ENSG00000276966, ENSG00000124635, ENSG00000275713, ENSG00000204256, ENSG00000163041, ENSG00000085224, ENSG00000278828, ENSG00000261716, ENSG00000183598, ENSG00000270882, ENSG00000187837, ENSG00000196890, ENSG00000220323, ENSG00000274290, ENSG00000197837, ENSG00000274750, ENSG00000189241, ENSG0000…	2285	148	19308	1.827	0.998055	0.0878739	0.0868741
GOTERM_BP_DIRECT	GO:0006622~protein targeting to lysosome	10	0.384763	0.0011045	ENSG00000135968, ENSG00000132842, ENSG00000126581, ENSG00000138760, ENSG00000132612, ENSG00000075785, ENSG00000134243, ENSG00000266412, ENSG00000137642, ENSG00000126775	2285	24	19308	3.52079	0.998647	0.0916888	0.0906456
GOTERM_BP_DIRECT	GO:0060261~positive regulation of transcription initiation from RNA polymerase II promoter	16	0.615621	0.00113857	ENSG00000197780, ENSG00000112658, ENSG00000178913, ENSG00000113387, ENSG00000156603, ENSG00000133398, ENSG00000174953, ENSG00000112282, ENSG00000225830, ENSG00000063322, ENSG00000165417, ENSG00000166337, ENSG00000108510, ENSG00000273841, ENSG00000161920, ENSG00000124641	2285	54	19308	2.50367	0.998896	0.0932227	0.0921622
GOTERM_BP_DIRECT	GO:0046777~protein autophosphorylation	37	1.42362	0.0011723	ENSG00000177169, ENSG00000186716, ENSG00000115977, ENSG00000066468, ENSG00000180370, ENSG00000082701, ENSG00000175224, ENSG00000006432, ENSG00000173517, ENSG00000149930, ENSG00000141736, ENSG00000130726, ENSG00000164715, ENSG00000149311, ENSG00000086232, ENSG00000154310, ENSG00000068078, ENSG00000023287, ENSG00000176444, ENSG00000099875, ENSG00000170145, ENSG00000077782, ENSG00000157106, ENSG0000…	2285	181	19308	1.72733	0.999098	0.0946867	0.0936094
GOTERM_BP_DIRECT	GO:0045859~regulation of protein kinase activity	9	0.346287	0.00128	ENSG00000142168, ENSG00000105401, ENSG00000138193, ENSG00000112425, ENSG00000109062, ENSG00000163249, ENSG00000108100, ENSG00000165699, ENSG00000155657	2285	20	19308	3.80245	0.999527	0.10115	0.0999992
GOTERM_BP_DIRECT	GO:0000422~mitophagy	14	0.538669	0.00128616	ENSG00000157954, ENSG00000126581, ENSG00000177169, ENSG00000023287, ENSG00000158828, ENSG00000070540, ENSG00000110046, ENSG00000066739, ENSG00000139112, ENSG00000161011, ENSG00000148158, ENSG00000164209, ENSG00000140941, ENSG00000034713	2285	44	19308	2.6886	0.999544	0.10115	0.0999992
GOTERM_BP_DIRECT	GO:0031333~negative regulation of protein complex assembly	13	0.500192	0.00132428	ENSG00000154059, ENSG00000215301, ENSG00000177169, ENSG00000044574, ENSG00000178585, ENSG00000113851, ENSG00000082701, ENSG00000005893, ENSG00000136854, ENSG00000137642, ENSG00000120885, ENSG00000105373, ENSG00000101782	2285	39	19308	2.81663	0.999637	0.102795	0.101626
GOTERM_BP_DIRECT	GO:0017148~negative regulation of translation	21	0.808003	0.00134905	ENSG00000215301, ENSG00000099622, ENSG00000179134, ENSG00000110888, ENSG00000155508, ENSG00000111640, ENSG00000204120, ENSG00000170881, ENSG00000179218, ENSG00000173933, ENSG00000174953, ENSG00000020577, ENSG00000136381, ENSG00000171617, ENSG00000188613, ENSG00000091127, ENSG00000124374, ENSG00000165699, ENSG00000185129, ENSG00000141543, ENSG00000167657	2285	83	19308	2.13792	0.999687	0.103375	0.102199
GOTERM_BP_DIRECT	GO:0031398~positive regulation of protein ubiquitination	20	0.769527	0.00153473	ENSG00000135924, ENSG00000102471, ENSG00000158828, ENSG00000044574, ENSG00000005810, ENSG00000166272, ENSG00000171720, ENSG00000135018, ENSG00000170315, ENSG00000165355, ENSG00000088832, ENSG00000145979, ENSG00000185651, ENSG00000183255, ENSG00000131507, ENSG00000109670, ENSG00000109501, ENSG00000103266, ENSG00000108465	2285	78	19308	2.16664	0.999897	0.11271	0.111427
GOTERM_BP_DIRECT	GO:0006898~receptor-mediated endocytosis	20	0.769527	0.00153473	ENSG00000213983, ENSG00000178950, ENSG00000157978, ENSG00000073921, ENSG00000130787, ENSG00000136279, ENSG00000150337, ENSG00000070371, ENSG00000137642, ENSG00000196923, ENSG00000154710, ENSG00000115234, ENSG00000085733, ENSG00000138760, ENSG00000183020, ENSG00000081014, ENSG00000153071, ENSG00000166747, ENSG00000197081, ENSG00000079805	2285	78	19308	2.16664	0.999897	0.11271	0.111427
GOTERM_BP_DIRECT	GO:0051893~regulation of focal adhesion assembly	10	0.384763	0.00154629	ENSG00000134318, ENSG00000090020, ENSG00000173517, ENSG00000137076, ENSG00000132670, ENSG00000165699, ENSG00000035403, ENSG00000184009, ENSG00000110880, ENSG00000167657	2285	25	19308	3.37996	0.999904	0.11271	0.111427
GOTERM_BP_DIRECT	GO:0045022~early endosome to late endosome transport	10	0.384763	0.00154629	ENSG00000166971, ENSG00000051009, ENSG00000196924, ENSG00000126581, ENSG00000105875, ENSG00000075785, ENSG00000076201, ENSG00000168172, ENSG00000164715, ENSG00000126775	2285	25	19308	3.37996	0.999904	0.11271	0.111427
GOTERM_BP_DIRECT	GO:0000281~mitotic cytokinesis	18	0.692574	0.00165581	ENSG00000180104, ENSG00000134318, ENSG00000155366, ENSG00000116903, ENSG00000152503, ENSG00000112685, ENSG00000096093, ENSG00000170248, ENSG00000138175, ENSG00000140463, ENSG00000172757, ENSG00000159140, ENSG00000143878, ENSG00000182473, ENSG00000138190, ENSG00000011295, ENSG00000144036, ENSG00000109103	2285	67	19308	2.27012	0.99995	0.119238	0.117882
GOTERM_BP_DIRECT	GO:0005975~carbohydrate metabolic process	35	1.34667	0.00175958	ENSG00000198162, ENSG00000175040, ENSG00000136856, ENSG00000068001, ENSG00000116406, ENSG00000169660, ENSG00000082701, ENSG00000065833, ENSG00000166411, ENSG00000053371, ENSG00000164976, ENSG00000088298, ENSG00000013375, ENSG00000162139, ENSG00000110917, ENSG00000027847, ENSG00000134109, ENSG00000104774, ENSG00000177830, ENSG00000070610, ENSG00000149541, ENSG00000159322, ENSG00000171298, ENSG0000…	2285	172	19308	1.71945	0.999973	0.125203	0.123778
GOTERM_BP_DIRECT	GO:0032869~cellular response to insulin stimulus	25	0.961908	0.0018168	ENSG00000112964, ENSG00000273749, ENSG00000136111, ENSG00000137145, ENSG00000084207, ENSG00000132376, ENSG00000171862, ENSG00000084733, ENSG00000001084, ENSG00000185950, ENSG00000101577, ENSG00000095637, ENSG00000145675, ENSG00000108443, ENSG00000167701, ENSG00000090020, ENSG00000152270, ENSG00000220205, ENSG00000067225, ENSG00000134324, ENSG00000170027, ENSG00000169895, ENSG00000100650, ENSG0000…	2285	109	19308	1.93805	0.999981	0.126488	0.125049
GOTERM_BP_DIRECT	GO:0034599~cellular response to oxidative stress	22	0.846479	0.00185461	ENSG00000099219, ENSG00000107643, ENSG00000196262, ENSG00000104687, ENSG00000130766, ENSG00000158828, ENSG00000173992, ENSG00000068903, ENSG00000174437, ENSG00000132356, ENSG00000006534, ENSG00000118689, ENSG00000204389, ENSG00000204388, ENSG00000159363, ENSG00000082641, ENSG00000160211, ENSG00000124214, ENSG00000271303, ENSG00000233276, ENSG00000180228, ENSG00000181019	2285	91	19308	2.04283	0.999985	0.126488	0.125049
GOTERM_BP_DIRECT	GO:0045055~regulated exocytosis	9	0.346287	0.00185505	ENSG00000101152, ENSG00000170348, ENSG00000084733, ENSG00000156675, ENSG00000006715, ENSG00000108639, ENSG00000100345, ENSG00000105649, ENSG00000107560	2285	21	19308	3.62138	0.999985	0.126488	0.125049
GOTERM_BP_DIRECT	GO:0034097~response to cytokine	15	0.577145	0.00186229	ENSG00000107758, ENSG00000112658, ENSG00000177606, ENSG00000134352, ENSG00000171552, ENSG00000170345, ENSG00000113594, ENSG00000159082, ENSG00000035862, ENSG00000087258, ENSG00000143384, ENSG00000148344, ENSG00000100234, ENSG00000162889, ENSG00000102575	2285	51	19308	2.48526	0.999985	0.126488	0.125049
GOTERM_BP_DIRECT	GO:0090522~vesicle tethering involved in exocytosis	6	0.230858	0.0019251	ENSG00000180104, ENSG00000116903, ENSG00000182473, ENSG00000138190, ENSG00000112685, ENSG00000144036	2285	9	19308	5.63326	0.99999	0.127848	0.126394
GOTERM_BP_DIRECT	GO:0009313~oligosaccharide catabolic process	6	0.230858	0.0019251	ENSG00000117151, ENSG00000204386, ENSG00000196743, ENSG00000140400, ENSG00000162139, ENSG00000109323	2285	9	19308	5.63326	0.99999	0.127848	0.126394
GOTERM_BP_DIRECT	GO:0072583~clathrin-dependent endocytosis	10	0.384763	0.00211934	ENSG00000178950, ENSG00000073921, ENSG00000183020, ENSG00000186111, ENSG00000137942, ENSG00000006125, ENSG00000116675, ENSG00000175416, ENSG00000161203, ENSG00000198825	2285	26	19308	3.24996	0.999997	0.137979	0.136409
GOTERM_BP_DIRECT	GO:0061709~reticulophagy	8	0.307811	0.00212382	ENSG00000144567, ENSG00000066739, ENSG00000120686, ENSG00000177169, ENSG00000023287, ENSG00000148158, ENSG00000110046, ENSG00000141699	2285	17	19308	3.97642	0.999997	0.137979	0.136409
GOTERM_BP_DIRECT	GO:0030042~actin filament depolymerization	7	0.269334	0.00222832	ENSG00000172757, ENSG00000125868, ENSG00000108819, ENSG00000243156, ENSG00000151239, ENSG00000148180, ENSG00000247596	2285	13	19308	4.54994	0.999998	0.142725	0.141102
GOTERM_BP_DIRECT	GO:0018105~peptidyl-serine phosphorylation	36	1.38515	0.00224464	ENSG00000134318, ENSG00000177169, ENSG00000075413, ENSG00000158828, ENSG00000104205, ENSG00000159256, ENSG00000180370, ENSG00000154229, ENSG00000082701, ENSG00000008710, ENSG00000117676, ENSG00000112062, ENSG00000141551, ENSG00000143479, ENSG00000086015, ENSG00000164715, ENSG00000149311, ENSG00000105053, ENSG00000145214, ENSG00000108443, ENSG00000183735, ENSG00000107643, ENSG00000211455, ENSG0000…	2285	181	19308	1.68064	0.999999	0.142725	0.141102
GOTERM_BP_DIRECT	GO:0030968~endoplasmic reticulum unfolded protein response	15	0.577145	0.00227549	ENSG00000135506, ENSG00000051108, ENSG00000099219, ENSG00000196396, ENSG00000044574, ENSG00000165280, ENSG00000068912, ENSG00000005486, ENSG00000179218, ENSG00000159461, ENSG00000140943, ENSG00000162772, ENSG00000109501, ENSG00000103266, ENSG00000108465	2285	52	19308	2.43747	0.999999	0.143164	0.141536
GOTERM_BP_DIRECT	GO:1904382~mannose trimming involved in glycoprotein ERAD pathway	5	0.192382	0.00240383	ENSG00000134109, ENSG00000116406, ENSG00000111885, ENSG00000088298, ENSG00000177239	2285	6	19308	7.04158	0.999999	0.149663	0.147961
GOTERM_BP_DIRECT	GO:0060271~cilium assembly	42	1.61601	0.00246132	ENSG00000101350, ENSG00000100360, ENSG00000024422, ENSG00000214413, ENSG00000068885, ENSG00000076201, ENSG00000137942, ENSG00000110047, ENSG00000157796, ENSG00000113971, ENSG00000148180, ENSG00000138175, ENSG00000140463, ENSG00000018408, ENSG00000146826, ENSG00000080298, ENSG00000168374, ENSG00000156042, ENSG00000148400, ENSG00000125124, ENSG00000015676, ENSG00000175970, ENSG00000131437, ENSG0000…	2285	222	19308	1.59863	1	0.151535	0.149811
GOTERM_BP_DIRECT	GO:0001837~epithelial to mesenchymal transition	14	0.538669	0.00248459	ENSG00000134318, ENSG00000115109, ENSG00000066468, ENSG00000134013, ENSG00000082701, ENSG00000069702, ENSG00000077782, ENSG00000196924, ENSG00000168036, ENSG00000130726, ENSG00000148400, ENSG00000100201, ENSG00000162552, ENSG00000108654	2285	47	19308	2.51699	1	0.151535	0.149811
GOTERM_BP_DIRECT	GO:0051443~positive regulation of ubiquitin-protein transferase activity	9	0.346287	0.00261583	ENSG00000140450, ENSG00000158828, ENSG00000185651, ENSG00000140988, ENSG00000150401, ENSG00000109670, ENSG00000168283, ENSG00000043093, ENSG00000103266	2285	22	19308	3.45677	1	0.157928	0.156131
GOTERM_BP_DIRECT	GO:0061025~membrane fusion	13	0.500192	0.00267467	ENSG00000092531, ENSG00000106636, ENSG00000220205, ENSG00000134265, ENSG00000138768, ENSG00000138119, ENSG00000029725, ENSG00000138279, ENSG00000197959, ENSG00000100568, ENSG00000183155, ENSG00000187446, ENSG00000079805	2285	42	19308	2.61544	1	0.159865	0.158046
GOTERM_BP_DIRECT	GO:0055088~lipid homeostasis	15	0.577145	0.00276148	ENSG00000215301, ENSG00000197296, ENSG00000160606, ENSG00000109919, ENSG00000177666, ENSG00000115970, ENSG00000100439, ENSG00000113163, ENSG00000135241, ENSG00000159363, ENSG00000082641, ENSG00000063761, ENSG00000185950, ENSG00000109670, ENSG00000161533	2285	53	19308	2.39148	1	0.162199	0.160354
GOTERM_BP_DIRECT	GO:0007584~response to nutrient	19	0.73105	0.00281065	ENSG00000239900, ENSG00000147162, ENSG00000072274, ENSG00000117305, ENSG00000171862, ENSG00000114353, ENSG00000081760, ENSG00000083123, ENSG00000113161, ENSG00000151726, ENSG00000001084, ENSG00000120868, ENSG00000162688, ENSG00000123983, ENSG00000100299, ENSG00000130707, ENSG00000143420, ENSG00000181019, ENSG00000108443	2285	76	19308	2.11247	1	0.162199	0.160354
GOTERM_BP_DIRECT	GO:0043488~regulation of mRNA stability	12	0.461716	0.00282333	ENSG00000198492, ENSG00000185728, ENSG00000179134, ENSG00000091542, ENSG00000100722, ENSG00000135870, ENSG00000154229, ENSG00000162889, ENSG00000134644, ENSG00000128016, ENSG00000174953, ENSG00000020577	2285	37	19308	2.74051	1	0.162199	0.160354
GOTERM_BP_DIRECT	GO:2001237~negative regulation of extrinsic apoptotic signaling pathway	12	0.461716	0.00282333	ENSG00000085733, ENSG00000091409, ENSG00000115760, ENSG00000160789, ENSG00000001084, ENSG00000023287, ENSG00000197386, ENSG00000115170, ENSG00000084207, ENSG00000154447, ENSG00000108443, ENSG00000131981	2285	37	19308	2.74051	1	0.162199	0.160354
GOTERM_BP_DIRECT	GO:0032200~telomere organization	10	0.384763	0.00284941	ENSG00000197837, ENSG00000274750, ENSG00000158406, ENSG00000276180, ENSG00000276966, ENSG00000163041, ENSG00000278828, ENSG00000270882, ENSG00000132475, ENSG00000273542	2285	27	19308	3.12959	1	0.162199	0.160354
GOTERM_BP_DIRECT	GO:0061644~protein localization to CENP-A containing chromatin	8	0.307811	0.00312359	ENSG00000197837, ENSG00000158406, ENSG00000276180, ENSG00000276966, ENSG00000124635, ENSG00000277075, ENSG00000270882, ENSG00000273542	2285	18	19308	3.75551	1	0.176129	0.174125
GOTERM_BP_DIRECT	GO:0061795~Golgi lumen acidification	6	0.230858	0.00347621	ENSG00000117410, ENSG00000071553, ENSG00000100554, ENSG00000182220, ENSG00000128524, ENSG00000114573	2285	10	19308	5.06993	1	0.19418	0.191971
GOTERM_BP_DIRECT	GO:0045727~positive regulation of translation	20	0.769527	0.0037855	ENSG00000215301, ENSG00000185728, ENSG00000198563, ENSG00000099622, ENSG00000158828, ENSG00000196576, ENSG00000075651, ENSG00000110321, ENSG00000204574, ENSG00000166173, ENSG00000169062, ENSG00000173933, ENSG00000020577, ENSG00000134030, ENSG00000185088, ENSG00000141736, ENSG00000167658, ENSG00000145388, ENSG00000141543, ENSG00000108443	2285	84	19308	2.01188	1	0.207388	0.205029
GOTERM_BP_DIRECT	GO:0060548~negative regulation of cell death	19	0.73105	0.00379144	ENSG00000154059, ENSG00000126581, ENSG00000132612, ENSG00000136999, ENSG00000104765, ENSG00000066135, ENSG00000124193, ENSG00000069329, ENSG00000119541, ENSG00000142871, ENSG00000118523, ENSG00000120885, ENSG00000204389, ENSG00000204388, ENSG00000141646, ENSG00000163956, ENSG00000146425, ENSG00000147457, ENSG00000255112	2285	78	19308	2.05831	1	0.207388	0.205029
GOTERM_BP_DIRECT	GO:0006887~exocytosis	25	0.961908	0.00381675	ENSG00000101152, ENSG00000092531, ENSG00000116903, ENSG00000073350, ENSG00000137501, ENSG00000243156, ENSG00000112685, ENSG00000198722, ENSG00000154305, ENSG00000136874, ENSG00000138190, ENSG00000124198, ENSG00000148943, ENSG00000073969, ENSG00000120451, ENSG00000124333, ENSG00000180104, ENSG00000220205, ENSG00000105649, ENSG00000081803, ENSG00000173805, ENSG00000011405, ENSG00000182473, ENSG0000…	2285	115	19308	1.83693	1	0.207388	0.205029
GOTERM_BP_DIRECT	GO:2000786~positive regulation of autophagosome assembly	8	0.307811	0.00444623	ENSG00000126581, ENSG00000177169, ENSG00000115839, ENSG00000166908, ENSG00000070540, ENSG00000148158, ENSG00000110046, ENSG00000165943	2285	19	19308	3.55785	1	0.239416	0.236692
GOTERM_BP_DIRECT	GO:0034727~piecemeal microautophagy of nucleus	5	0.192382	0.00508357	ENSG00000066739, ENSG00000177169, ENSG00000023287, ENSG00000110046, ENSG00000175224	2285	7	19308	6.03564	1	0.268889	0.26583
GOTERM_BP_DIRECT	GO:1990456~mitochondrion-ER tethering	5	0.192382	0.00508357	ENSG00000168710, ENSG00000165650, ENSG00000179364, ENSG00000198668, ENSG00000174437	2285	7	19308	6.03564	1	0.268889	0.26583
GOTERM_BP_DIRECT	GO:0046626~regulation of insulin receptor signaling pathway	7	0.269334	0.0052727	ENSG00000103197, ENSG00000196396, ENSG00000147162, ENSG00000170145, ENSG00000149212, ENSG00000145675, ENSG00000173933	2285	15	19308	3.94328	1	0.276447	0.273302
GOTERM_BP_DIRECT	GO:0048280~vesicle fusion with Golgi apparatus	6	0.230858	0.00575608	ENSG00000145817, ENSG00000100568, ENSG00000265808, ENSG00000138768, ENSG00000162236, ENSG00000124333	2285	11	19308	4.60903	1	0.294052	0.290707
GOTERM_BP_DIRECT	GO:0034454~microtubule anchoring at centrosome	6	0.230858	0.00575608	ENSG00000204843, ENSG00000140463, ENSG00000100503, ENSG00000131437, ENSG00000168172, ENSG00000174007	2285	11	19308	4.60903	1	0.294052	0.290707
GOTERM_BP_DIRECT	GO:0008090~retrograde axonal transport	6	0.230858	0.00575608	ENSG00000142168, ENSG00000173805, ENSG00000007168, ENSG00000197102, ENSG00000166579, ENSG00000143553	2285	11	19308	4.60903	1	0.294052	0.290707
GOTERM_BP_DIRECT	GO:0007507~heart development	40	1.53905	0.00584524	ENSG00000147050, ENSG00000103197, ENSG00000160602, ENSG00000115738, ENSG00000107758, ENSG00000117318, ENSG00000110321, ENSG00000114126, ENSG00000008710, ENSG00000171862, ENSG00000170776, ENSG00000005884, ENSG00000196923, ENSG00000148926, ENSG00000174705, ENSG00000138193, ENSG00000115170, ENSG00000159792, ENSG00000141736, ENSG00000148400, ENSG00000149311, ENSG00000145730, ENSG00000154553, ENSG0000…	2285	219	19308	1.54336	1	0.296076	0.292708
GOTERM_BP_DIRECT	GO:0006368~transcription elongation from RNA polymerase II promoter	11	0.42324	0.00592567	ENSG00000103363, ENSG00000181555, ENSG00000060069, ENSG00000120533, ENSG00000137815, ENSG00000198730, ENSG00000065883, ENSG00000109111, ENSG00000196235, ENSG00000130706, ENSG00000130165	2285	35	19308	2.65568	1	0.297628	0.294242
GOTERM_BP_DIRECT	GO:0009416~response to light stimulus	8	0.307811	0.00615113	ENSG00000066926, ENSG00000130522, ENSG00000120129, ENSG00000121671, ENSG00000170345, ENSG00000140521, ENSG00000079805, ENSG00000070669	2285	20	19308	3.37996	1	0.303845	0.300388
GOTERM_BP_DIRECT	GO:0032012~regulation of ARF protein signal transduction	8	0.307811	0.00615113	ENSG00000108669, ENSG00000008256, ENSG00000124313, ENSG00000108262, ENSG00000124198, ENSG00000101199, ENSG00000107862, ENSG00000139436	2285	20	19308	3.37996	1	0.303845	0.300388
GOTERM_BP_DIRECT	GO:0010592~positive regulation of lamellipodium assembly	10	0.384763	0.00627061	ENSG00000254999, ENSG00000165240, ENSG00000138193, ENSG00000273749, ENSG00000075618, ENSG00000145675, ENSG00000197822, ENSG00000136238, ENSG00000247596, ENSG00000079805	2285	30	19308	2.81663	1	0.307208	0.303713
GOTERM_BP_DIRECT	GO:0007040~lysosome organization	14	0.538669	0.0063962	ENSG00000132842, ENSG00000051009, ENSG00000126581, ENSG00000171298, ENSG00000069329, ENSG00000168172, ENSG00000166971, ENSG00000030582, ENSG00000102805, ENSG00000143669, ENSG00000140943, ENSG00000106460, ENSG00000143553, ENSG00000107521	2285	52	19308	2.27497	1	0.308553	0.305043
GOTERM_BP_DIRECT	GO:0016601~Rac protein signal transduction	9	0.346287	0.00640131	ENSG00000254999, ENSG00000166398, ENSG00000156299, ENSG00000273749, ENSG00000003393, ENSG00000006607, ENSG00000151491, ENSG00000136279, ENSG00000136238	2285	25	19308	3.04196	1	0.308553	0.305043
GOTERM_BP_DIRECT	GO:0009267~cellular response to starvation	18	0.692574	0.00671309	ENSG00000157954, ENSG00000136319, ENSG00000006715, ENSG00000070540, ENSG00000135821, ENSG00000005893, ENSG00000155876, ENSG00000204217, ENSG00000165861, ENSG00000038532, ENSG00000170836, ENSG00000183087, ENSG00000152409, ENSG00000125952, ENSG00000140941, ENSG00000162552, ENSG00000126775, ENSG00000145545	2285	76	19308	2.00129	1	0.319865	0.316226
GOTERM_BP_DIRECT	GO:0070936~protein K48-linked ubiquitination	16	0.615621	0.00674301	ENSG00000099804, ENSG00000180233, ENSG00000113558, ENSG00000077721, ENSG00000177479, ENSG00000119048, ENSG00000132388, ENSG00000166167, ENSG00000009335, ENSG00000168159, ENSG00000162298, ENSG00000159461, ENSG00000182670, ENSG00000118518, ENSG00000145495, ENSG00000078967	2285	64	19308	2.11247	1	0.319865	0.316226
GOTERM_BP_DIRECT	GO:0006749~glutathione metabolic process	13	0.500192	0.00723279	ENSG00000104687, ENSG00000023572, ENSG00000040531, ENSG00000169583, ENSG00000197448, ENSG00000084207, ENSG00000138413, ENSG00000142168, ENSG00000167468, ENSG00000144746, ENSG00000100577, ENSG00000160211, ENSG00000233276	2285	47	19308	2.3372	1	0.340397	0.336524
GOTERM_BP_DIRECT	GO:0042542~response to hydrogen peroxide	14	0.538669	0.00757749	ENSG00000100292, ENSG00000023572, ENSG00000198786, ENSG00000177606, ENSG00000167193, ENSG00000265972, ENSG00000142168, ENSG00000087258, ENSG00000120129, ENSG00000164305, ENSG00000121691, ENSG00000010810, ENSG00000167658, ENSG00000233276	2285	53	19308	2.23205	1	0.349522	0.345546
GOTERM_BP_DIRECT	GO:0061157~mRNA destabilization	7	0.269334	0.00760213	ENSG00000198492, ENSG00000134318, ENSG00000140718, ENSG00000185728, ENSG00000204120, ENSG00000134644, ENSG00000145388	2285	16	19308	3.69683	1	0.349522	0.345546
GOTERM_BP_DIRECT	GO:0006900~membrane budding	7	0.269334	0.00760213	ENSG00000073921, ENSG00000132612, ENSG00000137942, ENSG00000197747, ENSG00000106299, ENSG00000161203, ENSG00000147457	2285	16	19308	3.69683	1	0.349522	0.345546
GOTERM_BP_DIRECT	GO:0032092~positive regulation of protein binding	18	0.692574	0.00768844	ENSG00000130787, ENSG00000109756, ENSG00000157837, ENSG00000156299, ENSG00000075413, ENSG00000115109, ENSG00000110888, ENSG00000082701, ENSG00000008710, ENSG00000113971, ENSG00000080815, ENSG00000166971, ENSG00000102606, ENSG00000088832, ENSG00000159461, ENSG00000124486, ENSG00000106003, ENSG00000104375	2285	77	19308	1.9753	1	0.350792	0.346801
GOTERM_BP_DIRECT	GO:0036258~multivesicular body assembly	10	0.384763	0.00792582	ENSG00000132612, ENSG00000160948, ENSG00000119541, ENSG00000182149, ENSG00000115145, ENSG00000170248, ENSG00000074319, ENSG00000147457, ENSG00000131475, ENSG00000255112	2285	31	19308	2.72577	1	0.358883	0.3548
GOTERM_BP_DIRECT	GO:0071364~cellular response to epidermal growth factor stimulus	13	0.500192	0.00862883	ENSG00000126581, ENSG00000108819, ENSG00000084207, ENSG00000170345, ENSG00000132376, ENSG00000175866, ENSG00000141441, ENSG00000169895, ENSG00000153071, ENSG00000141736, ENSG00000179295, ENSG00000140992, ENSG00000128016	2285	48	19308	2.28851	1	0.386437	0.382041
GOTERM_BP_DIRECT	GO:0043484~regulation of RNA splicing	18	0.692574	0.00877449	ENSG00000104852, ENSG00000176444, ENSG00000113240, ENSG00000163660, ENSG00000159140, ENSG00000120533, ENSG00000143889, ENSG00000126945, ENSG00000169045, ENSG00000124422, ENSG00000071859, ENSG00000185567, ENSG00000013441, ENSG00000124942, ENSG00000166337, ENSG00000221978, ENSG00000273841, ENSG00000100320	2285	78	19308	1.94997	1	0.386437	0.382041
GOTERM_BP_DIRECT	GO:0098884~postsynaptic neurotransmitter receptor internalization	6	0.230858	0.00891563	ENSG00000197959, ENSG00000085832, ENSG00000183020, ENSG00000006125, ENSG00000079805, ENSG00000161203	2285	12	19308	4.22495	1	0.386437	0.382041
GOTERM_BP_DIRECT	GO:0006027~glycosaminoglycan catabolic process	6	0.230858	0.00891563	ENSG00000181523, ENSG00000068001, ENSG00000241489, ENSG00000170266, ENSG00000179163, ENSG00000010404, ENSG00000135677	2285	12	19308	4.22495	1	0.386437	0.382041
GOTERM_BP_DIRECT	GO:0010507~negative regulation of autophagy	14	0.538669	0.00892441	ENSG00000157625, ENSG00000110324, ENSG00000066135, ENSG00000112977, ENSG00000110321, ENSG00000116678, ENSG00000171552, ENSG00000068903, ENSG00000155876, ENSG00000104081, ENSG00000103657, ENSG00000143384, ENSG00000103257, ENSG00000145016	2285	54	19308	2.19071	1	0.386437	0.382041
GOTERM_BP_DIRECT	GO:0034605~cellular response to heat	14	0.538669	0.00892441	ENSG00000108953, ENSG00000100292, ENSG00000249915, ENSG00000165280, ENSG00000132002, ENSG00000066427, ENSG00000174437, ENSG00000174953, ENSG00000151929, ENSG00000204389, ENSG00000204388, ENSG00000162783, ENSG00000103266, ENSG00000124762	2285	54	19308	2.19071	1	0.386437	0.382041
GOTERM_BP_DIRECT	GO:0016055~Wnt signaling pathway	36	1.38515	0.00898691	ENSG00000198561, ENSG00000215301, ENSG00000107854, ENSG00000112425, ENSG00000105856, ENSG00000106829, ENSG00000082701, ENSG00000008710, ENSG00000113971, ENSG00000132356, ENSG00000141551, ENSG00000012822, ENSG00000117153, ENSG00000118518, ENSG00000153071, ENSG00000161202, ENSG00000108100, ENSG00000162552, ENSG00000070018, ENSG00000106025, ENSG00000115808, ENSG00000154310, ENSG00000137815, ENSG0000…	2285	197	19308	1.54414	1	0.386437	0.382041
GOTERM_BP_DIRECT	GO:0090063~positive regulation of microtubule nucleation	5	0.192382	0.00921914	ENSG00000204843, ENSG00000178104, ENSG00000204389, ENSG00000204388, ENSG00000108262	2285	8	19308	5.28118	1	0.388048	0.383633
GOTERM_BP_DIRECT	GO:1901888~regulation of cell junction assembly	5	0.192382	0.00921914	ENSG00000134318, ENSG00000116473, ENSG00000109756, ENSG00000127314, ENSG00000104067	2285	8	19308	5.28118	1	0.388048	0.383633
GOTERM_BP_DIRECT	GO:0010518~positive regulation of phospholipase activity	5	0.192382	0.00921914	ENSG00000142871, ENSG00000068078, ENSG00000066468, ENSG00000077782, ENSG00000140992	2285	8	19308	5.28118	1	0.388048	0.383633
GOTERM_BP_DIRECT	GO:0046907~intracellular transport	12	0.461716	0.00977286	ENSG00000132842, ENSG00000140463, ENSG00000065000, ENSG00000075785, ENSG00000103723, ENSG00000119396, ENSG00000204991, ENSG00000140104, ENSG00000138686, ENSG00000062725, ENSG00000151445, ENSG00000107521	2285	43	19308	2.35811	1	0.405022	0.400414
GOTERM_BP_DIRECT	GO:0032007~negative regulation of TOR signaling	10	0.384763	0.00989346	ENSG00000103197, ENSG00000135956, ENSG00000024048, ENSG00000112425, ENSG00000145979, ENSG00000249915, ENSG00000171100, ENSG00000165699, ENSG00000132356	2285	32	19308	2.64059	1	0.405022	0.400414
GOTERM_BP_DIRECT	GO:0006810~transport	10	0.384763	0.00989346	ENSG00000177542, ENSG00000162241, ENSG00000198792, ENSG00000168763, ENSG00000164168, ENSG00000013306, ENSG00000103978, ENSG00000158158, ENSG00000178537, ENSG00000153214	2285	32	19308	2.64059	1	0.405022	0.400414
GOTERM_BP_DIRECT	GO:0009058~biosynthetic process	10	0.384763	0.00989346	ENSG00000103707, ENSG00000172296, ENSG00000100116, ENSG00000100596, ENSG00000110455, ENSG00000137944, ENSG00000161217, ENSG00000101474, ENSG00000185813, ENSG00000167701	2285	32	19308	2.64059	1	0.405022	0.400414
GOTERM_BP_DIRECT	GO:0001701~in utero embryonic development	38	1.4621	0.0105546	ENSG00000147050, ENSG00000131446, ENSG00000183508, ENSG00000066468, ENSG00000137845, ENSG00000157796, ENSG00000134313, ENSG00000132376, ENSG00000008710, ENSG00000178537, ENSG00000119048, ENSG00000254999, ENSG00000165240, ENSG00000168036, ENSG00000115170, ENSG00000100345, ENSG00000107372, ENSG00000148400, ENSG00000153094, ENSG00000101752, ENSG00000264522, ENSG00000160679, ENSG00000150093, ENSG0000…	2285	213	19308	1.50749	1	0.42526	0.420421
GOTERM_BP_DIRECT	GO:0048489~synaptic vesicle transport	7	0.269334	0.0105903	ENSG00000089063, ENSG00000159082, ENSG00000170759, ENSG00000168036, ENSG00000105649, ENSG00000143553, ENSG00000079805	2285	17	19308	3.47937	1	0.42526	0.420421
GOTERM_BP_DIRECT	GO:0001778~plasma membrane repair	9	0.346287	0.0106013	ENSG00000166311, ENSG00000134108, ENSG00000132612, ENSG00000100345, ENSG00000105649, ENSG00000138119, ENSG00000119541, ENSG00000147457, ENSG00000255112	2285	27	19308	2.81663	1	0.42526	0.420421
GOTERM_BP_DIRECT	GO:0000289~nuclear-transcribed mRNA poly(A) tail shortening	8	0.307811	0.0109514	ENSG00000083223, ENSG00000179134, ENSG00000149115, ENSG00000155508, ENSG00000152520, ENSG00000080802, ENSG00000128016, ENSG00000020577	2285	22	19308	3.07269	1	0.434776	0.429829
GOTERM_BP_DIRECT	GO:0048870~cell motility	11	0.42324	0.010984	ENSG00000254999, ENSG00000085733, ENSG00000157933, ENSG00000172757, ENSG00000125868, ENSG00000062598, ENSG00000075651, ENSG00000129219, ENSG00000075618, ENSG00000171862, ENSG00000136238	2285	38	19308	2.44602	1	0.434776	0.429829
GOTERM_BP_DIRECT	GO:0045454~cell redox homeostasis	12	0.461716	0.0116708	ENSG00000104687, ENSG00000198431, ENSG00000001084, ENSG00000117450, ENSG00000023572, ENSG00000082641, ENSG00000108262, ENSG00000198843, ENSG00000023318, ENSG00000233276, ENSG00000136810, ENSG00000181019	2285	44	19308	2.30452	1	0.458925	0.453703
GOTERM_BP_DIRECT	GO:0031146~SCF-dependent proteasomal ubiquitin-dependent protein catabolic process	13	0.500192	0.0120431	ENSG00000103264, ENSG00000108306, ENSG00000113558, ENSG00000159069, ENSG00000151743, ENSG00000153558, ENSG00000158290, ENSG00000166167, ENSG00000116661, ENSG00000018408, ENSG00000165355, ENSG00000109670, ENSG00000107872	2285	50	19308	2.19697	1	0.470468	0.465116
GOTERM_BP_DIRECT	GO:0006099~tricarboxylic acid cycle	10	0.384763	0.0122074	ENSG00000073578, ENSG00000136381, ENSG00000119689, ENSG00000166411, ENSG00000105953, ENSG00000100412, ENSG00000143252, ENSG00000122729, ENSG00000168291, ENSG00000138413	2285	33	19308	2.56057	1	0.470731	0.465376
GOTERM_BP_DIRECT	GO:0048705~skeletal system morphogenesis	10	0.384763	0.0122074	ENSG00000167522, ENSG00000068001, ENSG00000107372, ENSG00000066468, ENSG00000077782, ENSG00000163659, ENSG00000172007, ENSG00000163785, ENSG00000180228, ENSG00000080815	2285	33	19308	2.56057	1	0.470731	0.465376
GOTERM_BP_DIRECT	GO:0001822~kidney development	24	0.923432	0.0129434	ENSG00000100360, ENSG00000068001, ENSG00000099139, ENSG00000115758, ENSG00000172785, ENSG00000008710, ENSG00000197603, ENSG00000006125, ENSG00000113971, ENSG00000137203, ENSG00000115234, ENSG00000138175, ENSG00000170348, ENSG00000120868, ENSG00000163348, ENSG00000153094, ENSG00000106392, ENSG00000163659, ENSG00000130707, ENSG00000165699, ENSG00000162552, ENSG00000032742, ENSG00000109501, ENSG0000…	2285	120	19308	1.68998	1	0.492025	0.486428
GOTERM_BP_DIRECT	GO:0006352~DNA-templated transcription, initiation	11	0.42324	0.0132432	ENSG00000197837, ENSG00000158406, ENSG00000197780, ENSG00000276180, ENSG00000276966, ENSG00000137947, ENSG00000178913, ENSG00000166337, ENSG00000270882, ENSG00000273841, ENSG00000273542	2285	39	19308	2.3833	1	0.492025	0.486428
GOTERM_BP_DIRECT	GO:0007032~endosome organization	11	0.42324	0.0132432	ENSG00000166971, ENSG00000051009, ENSG00000136051, ENSG00000135956, ENSG00000161011, ENSG00000155252, ENSG00000116903, ENSG00000003393, ENSG00000168172, ENSG00000124198, ENSG00000111540	2285	39	19308	2.3833	1	0.492025	0.486428
GOTERM_BP_DIRECT	GO:0070050~neuron cellular homeostasis	9	0.346287	0.013336	ENSG00000135924, ENSG00000204843, ENSG00000127419, ENSG00000106460, ENSG00000166963, ENSG00000080815, ENSG00000143553, ENSG00000174437, ENSG00000132356	2285	28	19308	2.71604	1	0.492025	0.486428
GOTERM_BP_DIRECT	GO:0051726~regulation of cell cycle	53	2.03925	0.0136211	ENSG00000186716, ENSG00000113812, ENSG00000152503, ENSG00000099860, ENSG00000177606, ENSG00000171223, ENSG00000171862, ENSG00000170846, ENSG00000148400, ENSG00000153391, ENSG00000221978, ENSG00000074319, ENSG00000130522, ENSG00000113328, ENSG00000164938, ENSG00000108819, ENSG00000134644, ENSG00000118762, ENSG00000166167, ENSG00000008086, ENSG00000100614, ENSG00000120129, ENSG00000079335, ENSG0000…	2285	324	19308	1.38224	1	0.492025	0.486428
GOTERM_BP_DIRECT	GO:0006101~citrate metabolic process	4	0.153905	0.0137419	ENSG00000136381, ENSG00000100412, ENSG00000122729, ENSG00000131473	2285	5	19308	6.75991	1	0.492025	0.486428
GOTERM_BP_DIRECT	GO:0035617~stress granule disassembly	4	0.153905	0.0137419	ENSG00000143479, ENSG00000170759, ENSG00000165280, ENSG00000126214	2285	5	19308	6.75991	1	0.492025	0.486428
GOTERM_BP_DIRECT	GO:2000370~positive regulation of clathrin-dependent endocytosis	4	0.153905	0.0137419	ENSG00000136021, ENSG00000153071, ENSG00000079805, ENSG00000106299	2285	5	19308	6.75991	1	0.492025	0.486428
GOTERM_BP_DIRECT	GO:0098957~anterograde axonal transport of mitochondrion	4	0.153905	0.0137419	ENSG00000173805, ENSG00000182606, ENSG00000135049, ENSG00000115993	2285	5	19308	6.75991	1	0.492025	0.486428
GOTERM_BP_DIRECT	GO:0051081~nuclear envelope disassembly	4	0.153905	0.0137419	ENSG00000204843, ENSG00000007168, ENSG00000011243, ENSG00000166579	2285	5	19308	6.75991	1	0.492025	0.486428
GOTERM_BP_DIRECT	GO:0016358~dendrite development	12	0.461716	0.0138372	ENSG00000115808, ENSG00000140463, ENSG00000131711, ENSG00000162065, ENSG00000108819, ENSG00000167193, ENSG00000164209, ENSG00000196655, ENSG00000166963, ENSG00000184402, ENSG00000146425, ENSG00000175866	2285	45	19308	2.2533	1	0.492025	0.486428
GOTERM_BP_DIRECT	GO:0070527~platelet aggregation	12	0.461716	0.0138372	ENSG00000101608, ENSG00000196924, ENSG00000116266, ENSG00000181467, ENSG00000196262, ENSG00000186222, ENSG00000051382, ENSG00000137076, ENSG00000100345, ENSG00000136854, ENSG00000035403, ENSG00000184009	2285	45	19308	2.2533	1	0.492025	0.486428
GOTERM_BP_DIRECT	GO:0043525~positive regulation of neuron apoptotic process	15	0.577145	0.0139398	ENSG00000099804, ENSG00000076984, ENSG00000177606, ENSG00000065559, ENSG00000137203, ENSG00000030582, ENSG00000118689, ENSG00000168036, ENSG00000135250, ENSG00000164305, ENSG00000153094, ENSG00000124588, ENSG00000149311, ENSG00000186318, ENSG00000181019	2285	63	19308	2.01188	1	0.492025	0.486428
GOTERM_BP_DIRECT	GO:0001666~response to hypoxia	33	1.26972	0.0139642	ENSG00000136856, ENSG00000177000, ENSG00000091542, ENSG00000134013, ENSG00000198786, ENSG00000135766, ENSG00000198727, ENSG00000132356, ENSG00000148926, ENSG00000117394, ENSG00000083444, ENSG00000103415, ENSG00000092108, ENSG00000123104, ENSG00000149311, ENSG00000145730, ENSG00000126581, ENSG00000129474, ENSG00000130402, ENSG00000100292, ENSG00000239900, ENSG00000112658, ENSG00000072274, ENSG0000…	2285	182	19308	1.53212	1	0.492025	0.486428
GOTERM_BP_DIRECT	GO:0006890~retrograde vesicle-mediated transport, Golgi to ER	13	0.500192	0.0140976	ENSG00000103051, ENSG00000197386, ENSG00000105669, ENSG00000134287, ENSG00000004059, ENSG00000122218, ENSG00000170348, ENSG00000154917, ENSG00000168374, ENSG00000136152, ENSG00000265808, ENSG00000092108, ENSG00000107862	2285	51	19308	2.15389	1	0.492025	0.486428
GOTERM_BP_DIRECT	GO:0018345~protein palmitoylation	8	0.307811	0.0141676	ENSG00000054392, ENSG00000171307, ENSG00000186908, ENSG00000163812, ENSG00000175048, ENSG00000135821, ENSG00000153786, ENSG00000180776	2285	23	19308	2.93909	1	0.492025	0.486428
GOTERM_BP_DIRECT	GO:0007264~small GTPase mediated signal transduction	24	0.923432	0.0142435	ENSG00000155366, ENSG00000186716, ENSG00000100292, ENSG00000109756, ENSG00000156299, ENSG00000136828, ENSG00000075651, ENSG00000138768, ENSG00000115963, ENSG00000164292, ENSG00000104805, ENSG00000136238, ENSG00000132254, ENSG00000138175, ENSG00000138193, ENSG00000183155, ENSG00000134909, ENSG00000088387, ENSG00000129219, ENSG00000187446, ENSG00000203879, ENSG00000147459, ENSG00000140983, ENSG0000…	2285	121	19308	1.67601	1	0.492025	0.486428
GOTERM_BP_DIRECT	GO:1902774~late endosome to lysosome transport	7	0.269334	0.0143236	ENSG00000134108, ENSG00000006715, ENSG00000225190, ENSG00000166887, ENSG00000143553, ENSG00000147457, ENSG00000255112	2285	18	19308	3.28607	1	0.492025	0.486428
GOTERM_BP_DIRECT	GO:0032469~endoplasmic reticulum calcium ion homeostasis	7	0.269334	0.0143236	ENSG00000051108, ENSG00000179364, ENSG00000109501, ENSG00000108588, ENSG00000080815, ENSG00000139644, ENSG00000174437	2285	18	19308	3.28607	1	0.492025	0.486428
GOTERM_BP_DIRECT	GO:0070973~protein localization to endoplasmic reticulum exit site	5	0.192382	0.0150544	ENSG00000185825, ENSG00000148396, ENSG00000154305, ENSG00000075790, ENSG00000107862	2285	9	19308	4.69438	1	0.51125	0.505434
GOTERM_BP_DIRECT	GO:0021860~pyramidal neuron development	5	0.192382	0.0150544	ENSG00000105953, ENSG00000165240, ENSG00000136021, ENSG00000066468, ENSG00000130827	2285	9	19308	4.69438	1	0.51125	0.505434
GOTERM_BP_DIRECT	GO:0007018~microtubule-based movement	19	0.73105	0.0154179	ENSG00000101350, ENSG00000197892, ENSG00000131437, ENSG00000197102, ENSG00000158486, ENSG00000114841, ENSG00000152763, ENSG00000139116, ENSG00000135720, ENSG00000144635, ENSG00000170759, ENSG00000054523, ENSG00000126777, ENSG00000185842, ENSG00000167702, ENSG00000165115, ENSG00000146425, ENSG00000126214, ENSG00000125971	2285	89	19308	1.80391	1	0.518046	0.512152
GOTERM_BP_DIRECT	GO:0046718~viral entry into host cell	21	0.808003	0.0154278	ENSG00000172270, ENSG00000068001, ENSG00000150093, ENSG00000110651, ENSG00000154639, ENSG00000072274, ENSG00000110400, ENSG00000173402, ENSG00000213937, ENSG00000166311, ENSG00000143324, ENSG00000085832, ENSG00000138760, ENSG00000204389, ENSG00000204388, ENSG00000168003, ENSG00000183087, ENSG00000123124, ENSG00000185896, ENSG00000125266, ENSG00000146425	2285	102	19308	1.73968	1	0.518046	0.512152
GOTERM_BP_DIRECT	GO:0031175~neuron projection development	25	0.961908	0.0160679	ENSG00000177169, ENSG00000109756, ENSG00000020129, ENSG00000036054, ENSG00000082701, ENSG00000110047, ENSG00000135127, ENSG00000225830, ENSG00000186222, ENSG00000154917, ENSG00000103657, ENSG00000164877, ENSG00000163785, ENSG00000143553, ENSG00000196072, ENSG00000132549, ENSG00000112658, ENSG00000108819, ENSG00000198910, ENSG00000158290, ENSG00000087258, ENSG00000162065, ENSG00000168385, ENSG0000…	2285	129	19308	1.63758	1	0.536523	0.530419
GOTERM_BP_DIRECT	GO:0034446~substrate adhesion-dependent cell spreading	14	0.538669	0.0162712	ENSG00000155760, ENSG00000130702, ENSG00000172037, ENSG00000138069, ENSG00000266028, ENSG00000136238, ENSG00000197702, ENSG00000135862, ENSG00000088812, ENSG00000173517, ENSG00000164877, ENSG00000089159, ENSG00000106780, ENSG00000145675	2285	58	19308	2.03963	1	0.538059	0.531937
GOTERM_BP_DIRECT	GO:0034198~cellular response to amino acid starvation	12	0.461716	0.0162939	ENSG00000154059, ENSG00000126581, ENSG00000107643, ENSG00000198198, ENSG00000130766, ENSG00000112977, ENSG00000080546, ENSG00000164603, ENSG00000149212, ENSG00000162772, ENSG00000155876, ENSG00000124762	2285	46	19308	2.20432	1	0.538059	0.531937
GOTERM_BP_DIRECT	GO:0048041~focal adhesion assembly	9	0.346287	0.0165518	ENSG00000085733, ENSG00000129474, ENSG00000186716, ENSG00000102606, ENSG00000173517, ENSG00000149930, ENSG00000070759, ENSG00000095637, ENSG00000140992	2285	29	19308	2.62238	1	0.543572	0.537388
GOTERM_BP_DIRECT	GO:0051056~regulation of small GTPase mediated signal transduction	23	0.884956	0.0166673	ENSG00000133789, ENSG00000103197, ENSG00000186716, ENSG00000182957, ENSG00000156299, ENSG00000196220, ENSG00000170471, ENSG00000174373, ENSG00000099331, ENSG00000145819, ENSG00000105738, ENSG00000131089, ENSG00000066933, ENSG00000266028, ENSG00000170776, ENSG00000139132, ENSG00000116991, ENSG00000196914, ENSG00000275832, ENSG00000188559, ENSG00000134909, ENSG00000031003, ENSG00000147799	2285	116	19308	1.67541	1	0.544375	0.538182
GOTERM_BP_DIRECT	GO:0098869~cellular oxidant detoxification	17	0.654098	0.0168974	ENSG00000129235, ENSG00000104687, ENSG00000198431, ENSG00000130766, ENSG00000164938, ENSG00000080546, ENSG00000198843, ENSG00000197448, ENSG00000084207, ENSG00000136810, ENSG00000167468, ENSG00000167693, ENSG00000100577, ENSG00000148344, ENSG00000143198, ENSG00000271303, ENSG00000233276	2285	77	19308	1.86556	1	0.548888	0.542644
GOTERM_BP_DIRECT	GO:0032438~melanosome organization	8	0.307811	0.0180052	ENSG00000132842, ENSG00000196072, ENSG00000115020, ENSG00000186222, ENSG00000143669, ENSG00000065000, ENSG00000166747, ENSG00000143553	2285	24	19308	2.81663	1	0.572524	0.56601
GOTERM_BP_DIRECT	GO:0048854~brain morphogenesis	8	0.307811	0.0180052	ENSG00000140463, ENSG00000118689, ENSG00000007168, ENSG00000044115, ENSG00000171862, ENSG00000149823, ENSG00000080815, ENSG00000125124	2285	24	19308	2.81663	1	0.572524	0.56601
GOTERM_BP_DIRECT	GO:0043408~regulation of MAPK cascade	10	0.384763	0.0180081	ENSG00000196182, ENSG00000154310, ENSG00000177885, ENSG00000149930, ENSG00000182220, ENSG00000180370, ENSG00000141503, ENSG00000135090, ENSG00000272398, ENSG00000104375	2285	35	19308	2.41425	1	0.572524	0.56601
GOTERM_BP_DIRECT	GO:0030100~regulation of endocytosis	10	0.384763	0.0180081	ENSG00000103197, ENSG00000213463, ENSG00000073921, ENSG00000130787, ENSG00000196396, ENSG00000100266, ENSG00000101199, ENSG00000168118, ENSG00000111540, ENSG00000115234	2285	35	19308	2.41425	1	0.572524	0.56601
GOTERM_BP_DIRECT	GO:0007034~vacuolar transport	6	0.230858	0.0184193	ENSG00000102471, ENSG00000006715, ENSG00000131507, ENSG00000159720, ENSG00000151445, ENSG00000147457	2285	14	19308	3.62138	1	0.573396	0.566873
GOTERM_BP_DIRECT	GO:0051452~intracellular pH reduction	6	0.230858	0.0184193	ENSG00000117410, ENSG00000071553, ENSG00000100554, ENSG00000182220, ENSG00000128524, ENSG00000114573	2285	14	19308	3.62138	1	0.573396	0.566873
GOTERM_BP_DIRECT	GO:0036465~synaptic vesicle recycling	6	0.230858	0.0184193	ENSG00000065000, ENSG00000105649, ENSG00000103723, ENSG00000108262, ENSG00000129219, ENSG00000139436	2285	14	19308	3.62138	1	0.573396	0.566873
GOTERM_BP_DIRECT	GO:0090110~cargo loading into COPII-coated vesicle	6	0.230858	0.0184193	ENSG00000125875, ENSG00000138069, ENSG00000138674, ENSG00000154305, ENSG00000176986, ENSG00000075826	2285	14	19308	3.62138	1	0.573396	0.566873
GOTERM_BP_DIRECT	GO:0031532~actin cytoskeleton reorganization	14	0.538669	0.018675	ENSG00000154310, ENSG00000177885, ENSG00000196396, ENSG00000198752, ENSG00000006607, ENSG00000151491, ENSG00000178209, ENSG00000154639, ENSG00000197702, ENSG00000196924, ENSG00000085733, ENSG00000100345, ENSG00000164877, ENSG00000141503	2285	59	19308	2.00506	1	0.575439	0.568893
GOTERM_BP_DIRECT	GO:0016266~O-glycan processing	11	0.42324	0.0187815	ENSG00000164574, ENSG00000119514, ENSG00000187210, ENSG00000141429, ENSG00000173950, ENSG00000106392, ENSG00000170340, ENSG00000172986, ENSG00000151233, ENSG00000109586, ENSG00000143641	2285	41	19308	2.26704	1	0.575439	0.568893
GOTERM_BP_DIRECT	GO:0048268~clathrin coat assembly	7	0.269334	0.0188825	ENSG00000085832, ENSG00000073921, ENSG00000130787, ENSG00000011405, ENSG00000153071, ENSG00000006125, ENSG00000175416	2285	19	19308	3.11312	1	0.575439	0.568893
GOTERM_BP_DIRECT	GO:1902236~negative regulation of endoplasmic reticulum stress-induced intrinsic apoptotic signaling pathway	7	0.269334	0.0188825	ENSG00000051108, ENSG00000162298, ENSG00000204389, ENSG00000196396, ENSG00000171552, ENSG00000109501, ENSG00000139644	2285	19	19308	3.11312	1	0.575439	0.568893
GOTERM_BP_DIRECT	GO:0006487~protein N-linked glycosylation	13	0.500192	0.0189926	ENSG00000027847, ENSG00000131446, ENSG00000151348, ENSG00000117643, ENSG00000152127, ENSG00000228474, ENSG00000115275, ENSG00000187097, ENSG00000013375, ENSG00000163527, ENSG00000102158, ENSG00000086062, ENSG00000110917	2285	53	19308	2.07261	1	0.575439	0.568893
GOTERM_BP_DIRECT	GO:0006091~generation of precursor metabolites and energy	12	0.461716	0.0190626	ENSG00000151729, ENSG00000066926, ENSG00000119689, ENSG00000067177, ENSG00000156873, ENSG00000105953, ENSG00000100412, ENSG00000005469, ENSG00000184203, ENSG00000111775, ENSG00000065615, ENSG00000161533	2285	47	19308	2.15742	1	0.575439	0.568893
GOTERM_BP_DIRECT	GO:0007015~actin filament organization	26	1.00038	0.019479	ENSG00000128872, ENSG00000196586, ENSG00000044115, ENSG00000164292, ENSG00000136238, ENSG00000176658, ENSG00000110880, ENSG00000254999, ENSG00000138594, ENSG00000034510, ENSG00000172725, ENSG00000165322, ENSG00000143878, ENSG00000050820, ENSG00000175130, ENSG00000155366, ENSG00000130787, ENSG00000108819, ENSG00000115963, ENSG00000149925, ENSG00000062598, ENSG00000133030, ENSG00000157483, ENSG0000…	2285	138	19308	1.59201	1	0.585055	0.578399
GOTERM_BP_DIRECT	GO:0021766~hippocampus development	16	0.615621	0.0198501	ENSG00000108799, ENSG00000108953, ENSG00000105953, ENSG00000105426, ENSG00000112658, ENSG00000108819, ENSG00000082701, ENSG00000167193, ENSG00000140463, ENSG00000007168, ENSG00000170759, ENSG00000164305, ENSG00000130827, ENSG00000165699, ENSG00000125124, ENSG00000145545	2285	72	19308	1.87775	1	0.59322	0.586471
GOTERM_BP_DIRECT	GO:0032868~response to insulin	18	0.692574	0.020213	ENSG00000129003, ENSG00000178567, ENSG00000130766, ENSG00000147162, ENSG00000124193, ENSG00000134243, ENSG00000170345, ENSG00000112062, ENSG00000116266, ENSG00000148926, ENSG00000084754, ENSG00000117394, ENSG00000187210, ENSG00000121671, ENSG00000125952, ENSG00000121691, ENSG00000149212, ENSG00000165699	2285	85	19308	1.78939	1	0.600376	0.593545
GOTERM_BP_DIRECT	GO:0061024~membrane organization	9	0.346287	0.0202904	ENSG00000159082, ENSG00000011405, ENSG00000148341, ENSG00000186111, ENSG00000115977, ENSG00000087253, ENSG00000169905, ENSG00000187446, ENSG00000079805	2285	30	19308	2.53497	1	0.600376	0.593545
GOTERM_BP_DIRECT	GO:0001889~liver development	19	0.73105	0.0212546	ENSG00000198563, ENSG00000023287, ENSG00000177606, ENSG00000069702, ENSG00000117305, ENSG00000008710, ENSG00000112893, ENSG00000118762, ENSG00000081760, ENSG00000164442, ENSG00000165240, ENSG00000148400, ENSG00000100412, ENSG00000130707, ENSG00000162552, ENSG00000197081, ENSG00000145545, ENSG00000108465, ENSG00000070669	2285	92	19308	1.74509	1	0.622087	0.615009
GOTERM_BP_DIRECT	GO:0008286~insulin receptor signaling pathway	14	0.538669	0.0213364	ENSG00000136856, ENSG00000177885, ENSG00000196396, ENSG00000082701, ENSG00000132670, ENSG00000175866, ENSG00000011405, ENSG00000117461, ENSG00000185950, ENSG00000148730, ENSG00000095637, ENSG00000145675, ENSG00000166579, ENSG00000050820	2285	60	19308	1.97164	1	0.622087	0.615009
GOTERM_BP_DIRECT	GO:0022900~electron transport chain	14	0.538669	0.0213364	ENSG00000073578, ENSG00000104687, ENSG00000023572, ENSG00000134013, ENSG00000159423, ENSG00000119013, ENSG00000065833, ENSG00000148290, ENSG00000143753, ENSG00000171503, ENSG00000053371, ENSG00000124588, ENSG00000127954, ENSG00000145545	2285	60	19308	1.97164	1	0.622087	0.615009
GOTERM_BP_DIRECT	GO:0007095~mitotic G2 DNA damage checkpoint	10	0.384763	0.0215602	ENSG00000161010, ENSG00000113328, ENSG00000053254, ENSG00000149930, ENSG00000149311, ENSG00000135090, ENSG00000105373, ENSG00000163322, ENSG00000124762, ENSG00000108465	2285	36	19308	2.34719	1	0.625559	0.618442
GOTERM_BP_DIRECT	GO:0006906~vesicle fusion	11	0.42324	0.0221128	ENSG00000092531, ENSG00000079950, ENSG00000220205, ENSG00000100568, ENSG00000139190, ENSG00000117758, ENSG00000187446, ENSG00000166900, ENSG00000136874, ENSG00000162236, ENSG00000124333	2285	42	19308	2.21307	1	0.630844	0.623667
GOTERM_BP_DIRECT	GO:0032465~regulation of cytokinesis	11	0.42324	0.0221128	ENSG00000181555, ENSG00000126581, ENSG00000115760, ENSG00000140463, ENSG00000198642, ENSG00000090565, ENSG00000162413, ENSG00000198668, ENSG00000108262, ENSG00000171552, ENSG00000131242	2285	42	19308	2.21307	1	0.630844	0.623667
GOTERM_BP_DIRECT	GO:1990090~cellular response to nerve growth factor stimulus	11	0.42324	0.0221128	ENSG00000141551, ENSG00000116473, ENSG00000118689, ENSG00000109756, ENSG00000044574, ENSG00000167193, ENSG00000110047, ENSG00000134313, ENSG00000171862, ENSG00000135720, ENSG00000114331	2285	42	19308	2.21307	1	0.630844	0.623667
GOTERM_BP_DIRECT	GO:0006635~fatty acid beta-oxidation	12	0.461716	0.0221645	ENSG00000084754, ENSG00000060971, ENSG00000111271, ENSG00000130766, ENSG00000157184, ENSG00000133835, ENSG00000101986, ENSG00000117528, ENSG00000138029, ENSG00000005469, ENSG00000161533, ENSG00000127884	2285	48	19308	2.11247	1	0.630844	0.623667
GOTERM_BP_DIRECT	GO:0034063~stress granule assembly	8	0.307811	0.0225179	ENSG00000198492, ENSG00000215301, ENSG00000185728, ENSG00000183283, ENSG00000099622, ENSG00000197102, ENSG00000145907, ENSG00000138757	2285	25	19308	2.70396	1	0.634856	0.627633
GOTERM_BP_DIRECT	GO:0006672~ceramide metabolic process	8	0.307811	0.0225179	ENSG00000103066, ENSG00000113163, ENSG00000067113, ENSG00000105568, ENSG00000177076, ENSG00000100422, ENSG00000128699, ENSG00000123353	2285	25	19308	2.70396	1	0.634856	0.627633
GOTERM_BP_DIRECT	GO:1904903~ESCRT III complex disassembly	5	0.192382	0.0227732	ENSG00000132612, ENSG00000119541, ENSG00000182149, ENSG00000147457, ENSG00000255112	2285	10	19308	4.22495	1	0.636052	0.628816
GOTERM_BP_DIRECT	GO:0007033~vacuole organization	5	0.192382	0.0227732	ENSG00000132612, ENSG00000215305, ENSG00000182197, ENSG00000112367, ENSG00000112893	2285	10	19308	4.22495	1	0.636052	0.628816
GOTERM_BP_DIRECT	GO:0001764~neuron migration	23	0.884956	0.023972	ENSG00000067141, ENSG00000131711, ENSG00000108953, ENSG00000109756, ENSG00000112658, ENSG00000167193, ENSG00000077782, ENSG00000131584, ENSG00000154447, ENSG00000137267, ENSG00000136238, ENSG00000080815, ENSG00000005884, ENSG00000140463, ENSG00000054282, ENSG00000007168, ENSG00000008086, ENSG00000168036, ENSG00000183087, ENSG00000010810, ENSG00000166579, ENSG00000124486, ENSG00000142687	2285	120	19308	1.61956	1	0.654599	0.647151
GOTERM_BP_DIRECT	GO:0036503~ERAD pathway	7	0.269334	0.0243387	ENSG00000162298, ENSG00000165280, ENSG00000145495, ENSG00000068912, ENSG00000170881, ENSG00000108588, ENSG00000071537	2285	20	19308	2.95746	1	0.654599	0.647151
GOTERM_BP_DIRECT	GO:0034067~protein localization to Golgi apparatus	7	0.269334	0.0243387	ENSG00000135968, ENSG00000178950, ENSG00000141551, ENSG00000204070, ENSG00000172007, ENSG00000107862, ENSG00000137642	2285	20	19308	2.95746	1	0.654599	0.647151
GOTERM_BP_DIRECT	GO:0035329~hippo signaling	7	0.269334	0.0243387	ENSG00000166025, ENSG00000018408, ENSG00000198961, ENSG00000114978, ENSG00000150457, ENSG00000173542, ENSG00000104375	2285	20	19308	2.95746	1	0.654599	0.647151
GOTERM_BP_DIRECT	GO:0030308~negative regulation of cell growth	24	0.923432	0.0243621	ENSG00000135924, ENSG00000153487, ENSG00000215301, ENSG00000068001, ENSG00000136999, ENSG00000105568, ENSG00000130766, ENSG00000110888, ENSG00000108819, ENSG00000068745, ENSG00000197019, ENSG00000115310, ENSG00000175602, ENSG00000204217, ENSG00000204389, ENSG00000143537, ENSG00000204388, ENSG00000153071, ENSG00000144560, ENSG00000135919, ENSG00000141646, ENSG00000101079, ENSG00000140961, ENSG0000…	2285	127	19308	1.59683	1	0.654599	0.647151
GOTERM_BP_DIRECT	GO:1902902~negative regulation of autophagosome assembly	6	0.230858	0.0249926	ENSG00000126581, ENSG00000158828, ENSG00000265808, ENSG00000171100, ENSG00000171055, ENSG00000092108	2285	15	19308	3.37996	1	0.654599	0.647151
GOTERM_BP_DIRECT	GO:0030970~retrograde protein transport, ER to cytosol	6	0.230858	0.0249926	ENSG00000135506, ENSG00000051108, ENSG00000162298, ENSG00000165280, ENSG00000071537, ENSG00000182446	2285	15	19308	3.37996	1	0.654599	0.647151
GOTERM_BP_DIRECT	GO:0046685~response to arsenic-containing substance	6	0.230858	0.0249926	ENSG00000066926, ENSG00000001084, ENSG00000171862, ENSG00000173933, ENSG00000148218, ENSG00000124762	2285	15	19308	3.37996	1	0.654599	0.647151
GOTERM_BP_DIRECT	GO:1900153~positive regulation of nuclear-transcribed mRNA catabolic process, deadenylation-dependent decay	6	0.230858	0.0249926	ENSG00000078687, ENSG00000188613, ENSG00000100354, ENSG00000070756, ENSG00000128016, ENSG00000174953	2285	15	19308	3.37996	1	0.654599	0.647151
GOTERM_BP_DIRECT	GO:0003016~respiratory system process	6	0.230858	0.0249926	ENSG00000132842, ENSG00000196182, ENSG00000147050, ENSG00000107372, ENSG00000105649, ENSG00000164924	2285	15	19308	3.37996	1	0.654599	0.647151
GOTERM_BP_DIRECT	GO:0033120~positive regulation of RNA splicing	6	0.230858	0.0249926	ENSG00000181222, ENSG00000204389, ENSG00000143889, ENSG00000130956, ENSG00000145675, ENSG00000100650	2285	15	19308	3.37996	1	0.654599	0.647151
GOTERM_BP_DIRECT	GO:1900029~positive regulation of ruffle assembly	6	0.230858	0.0249926	ENSG00000119812, ENSG00000273749, ENSG00000225190, ENSG00000151491, ENSG00000166579, ENSG00000177106	2285	15	19308	3.37996	1	0.654599	0.647151
GOTERM_BP_DIRECT	GO:0098780~response to mitochondrial depolarisation	4	0.153905	0.02508	ENSG00000126581, ENSG00000161011, ENSG00000175224, ENSG00000126775	2285	6	19308	5.63326	1	0.654599	0.647151
GOTERM_BP_DIRECT	GO:1903298~negative regulation of hypoxia-induced intrinsic apoptotic signaling pathway	4	0.153905	0.02508	ENSG00000051382, ENSG00000158828, ENSG00000149428, ENSG00000139644	2285	6	19308	5.63326	1	0.654599	0.647151
GOTERM_BP_DIRECT	GO:0010793~regulation of mRNA export from nucleus	4	0.153905	0.02508	ENSG00000181555, ENSG00000109111, ENSG00000125676, ENSG00000011243	2285	6	19308	5.63326	1	0.654599	0.647151
GOTERM_BP_DIRECT	GO:0051592~response to calcium ion	14	0.538669	0.0274926	ENSG00000249915, ENSG00000198668, ENSG00000265972, ENSG00000138674, ENSG00000155657, ENSG00000138279, ENSG00000198727, ENSG00000168710, ENSG00000119523, ENSG00000144935, ENSG00000120129, ENSG00000148344, ENSG00000203879, ENSG00000184009	2285	62	19308	1.90804	1	0.714449	0.706321
GOTERM_BP_DIRECT	GO:0001843~neural tube closure	17	0.654098	0.0294102	ENSG00000147050, ENSG00000157933, ENSG00000181555, ENSG00000103197, ENSG00000177000, ENSG00000196576, ENSG00000148926, ENSG00000140463, ENSG00000164442, ENSG00000120868, ENSG00000204256, ENSG00000107882, ENSG00000165699, ENSG00000180900, ENSG00000070018, ENSG00000142875, ENSG00000124145	2285	82	19308	1.75181	1	0.756023	0.747421
GOTERM_BP_DIRECT	GO:0031623~receptor internalization	12	0.461716	0.0294498	ENSG00000028528, ENSG00000197959, ENSG00000148926, ENSG00000157978, ENSG00000073921, ENSG00000177885, ENSG00000112964, ENSG00000150093, ENSG00000110651, ENSG00000072274, ENSG00000079805, ENSG00000161203	2285	50	19308	2.02797	1	0.756023	0.747421
GOTERM_BP_DIRECT	GO:0051491~positive regulation of filopodium assembly	9	0.346287	0.0294904	ENSG00000197959, ENSG00000113657, ENSG00000112658, ENSG00000188157, ENSG00000137942, ENSG00000075618, ENSG00000145675, ENSG00000141741, ENSG00000106299	2285	32	19308	2.37653	1	0.756023	0.747421
GOTERM_BP_DIRECT	GO:0006629~lipid metabolic process	35	1.34667	0.0295983	ENSG00000107798, ENSG00000161714, ENSG00000110721, ENSG00000131748, ENSG00000151498, ENSG00000113971, ENSG00000006534, ENSG00000168092, ENSG00000174238, ENSG00000083123, ENSG00000184381, ENSG00000053371, ENSG00000160211, ENSG00000101577, ENSG00000143198, ENSG00000214078, ENSG00000164535, ENSG00000103066, ENSG00000213398, ENSG00000006007, ENSG00000167193, ENSG00000117305, ENSG00000158555, ENSG0000…	2285	207	19308	1.42873	1	0.756023	0.747421
GOTERM_BP_DIRECT	GO:1900026~positive regulation of substrate adhesion-dependent cell spreading	11	0.42324	0.0300232	ENSG00000196924, ENSG00000111859, ENSG00000102606, ENSG00000153071, ENSG00000167193, ENSG00000185624, ENSG00000179218, ENSG00000147459, ENSG00000136238, ENSG00000079805, ENSG00000197747	2285	44	19308	2.11247	1	0.761334	0.752673
GOTERM_BP_DIRECT	GO:0090263~positive regulation of canonical Wnt signaling pathway	21	0.808003	0.0300611	ENSG00000215301, ENSG00000073711, ENSG00000107854, ENSG00000173273, ENSG00000110888, ENSG00000170242, ENSG00000066468, ENSG00000165280, ENSG00000069329, ENSG00000173801, ENSG00000115464, ENSG00000119048, ENSG00000138032, ENSG00000060237, ENSG00000141551, ENSG00000205213, ENSG00000100614, ENSG00000100744, ENSG00000118518, ENSG00000182220, ENSG00000167657	2285	109	19308	1.62796	1	0.761334	0.752673
GOTERM_BP_DIRECT	GO:0006869~lipid transport	18	0.692574	0.0305632	ENSG00000129003, ENSG00000067221, ENSG00000132549, ENSG00000110721, ENSG00000117859, ENSG00000117868, ENSG00000064687, ENSG00000196743, ENSG00000136478, ENSG00000197969, ENSG00000165650, ENSG00000113163, ENSG00000139641, ENSG00000163382, ENSG00000106086, ENSG00000149823, ENSG00000124574, ENSG00000141179	2285	89	19308	1.70897	1	0.765087	0.756382
GOTERM_BP_DIRECT	GO:0007409~axonogenesis	18	0.692574	0.0305632	ENSG00000131711, ENSG00000073921, ENSG00000186908, ENSG00000105649, ENSG00000066468, ENSG00000197956, ENSG00000175866, ENSG00000187164, ENSG00000084733, ENSG00000141385, ENSG00000105290, ENSG00000084234, ENSG00000003393, ENSG00000149930, ENSG00000164715, ENSG00000179295, ENSG00000166963, ENSG00000163785	2285	89	19308	1.70897	1	0.765087	0.756382
GOTERM_BP_DIRECT	GO:0030521~androgen receptor signaling pathway	7	0.269334	0.0307546	ENSG00000067113, ENSG00000013561, ENSG00000115548, ENSG00000100201, ENSG00000108175, ENSG00000086061, ENSG00000108654	2285	21	19308	2.81663	1	0.765087	0.756382
GOTERM_BP_DIRECT	GO:0022904~respiratory electron transport chain	7	0.269334	0.0307546	ENSG00000073578, ENSG00000171503, ENSG00000256525, ENSG00000158828, ENSG00000178209, ENSG00000198727, ENSG00000205707	2285	21	19308	2.81663	1	0.765087	0.756382
GOTERM_BP_DIRECT	GO:0016310~phosphorylation	24	0.923432	0.0311474	ENSG00000106733, ENSG00000241973, ENSG00000155252, ENSG00000156110, ENSG00000166908, ENSG00000068745, ENSG00000180370, ENSG00000173137, ENSG00000135002, ENSG00000138801, ENSG00000198964, ENSG00000120137, ENSG00000008130, ENSG00000011405, ENSG00000051382, ENSG00000179918, ENSG00000139163, ENSG00000186111, ENSG00000063761, ENSG00000100422, ENSG00000078902, ENSG00000143774, ENSG00000124784, ENSG0000…	2285	130	19308	1.55998	1	0.765087	0.756382
GOTERM_BP_DIRECT	GO:1903078~positive regulation of protein localization to plasma membrane	13	0.500192	0.0324237	ENSG00000150093, ENSG00000108819, ENSG00000005884, ENSG00000131981, ENSG00000161011, ENSG00000170759, ENSG00000120756, ENSG00000105270, ENSG00000095637, ENSG00000107560, ENSG00000145675, ENSG00000166900, ENSG00000140992	2285	57	19308	1.92717	1	0.765087	0.756382
GOTERM_BP_DIRECT	GO:0016188~synaptic vesicle maturation	5	0.192382	0.0324972	ENSG00000073921, ENSG00000105649, ENSG00000198722, ENSG00000136854, ENSG00000143553	2285	11	19308	3.84086	1	0.765087	0.756382
GOTERM_BP_DIRECT	GO:0060627~regulation of vesicle-mediated transport	5	0.192382	0.0324972	ENSG00000220205, ENSG00000140943, ENSG00000075651, ENSG00000129219, ENSG00000132356	2285	11	19308	3.84086	1	0.765087	0.756382
GOTERM_BP_DIRECT	GO:0060055~angiogenesis involved in wound healing	5	0.192382	0.0324972	ENSG00000051382, ENSG00000112658, ENSG00000086062, ENSG00000233276, ENSG00000173402	2285	11	19308	3.84086	1	0.765087	0.756382
GOTERM_BP_DIRECT	GO:2000369~regulation of clathrin-dependent endocytosis	5	0.192382	0.0324972	ENSG00000073921, ENSG00000130787, ENSG00000051382, ENSG00000115977, ENSG00000116675	2285	11	19308	3.84086	1	0.765087	0.756382
GOTERM_BP_DIRECT	GO:0035542~regulation of SNARE complex assembly	5	0.192382	0.0324972	ENSG00000006715, ENSG00000215305, ENSG00000166887, ENSG00000136854, ENSG00000156931	2285	11	19308	3.84086	1	0.765087	0.756382
GOTERM_BP_DIRECT	GO:0051036~regulation of endosome size	5	0.192382	0.0324972	ENSG00000196072, ENSG00000003393, ENSG00000166275, ENSG00000254901, ENSG00000143553	2285	11	19308	3.84086	1	0.765087	0.756382
GOTERM_BP_DIRECT	GO:0070198~protein localization to chromosome, telomeric region	5	0.192382	0.0324972	ENSG00000092330, ENSG00000107854, ENSG00000173273, ENSG00000085224, ENSG00000166848	2285	11	19308	3.84086	1	0.765087	0.756382
GOTERM_BP_DIRECT	GO:0034058~endosomal vesicle fusion	5	0.192382	0.0324972	ENSG00000132612, ENSG00000006715, ENSG00000215305, ENSG00000166887, ENSG00000156931	2285	11	19308	3.84086	1	0.765087	0.756382
GOTERM_BP_DIRECT	GO:0071786~endoplasmic reticulum tubular network organization	5	0.192382	0.0324972	ENSG00000084733, ENSG00000133318, ENSG00000144320, ENSG00000115310, ENSG00000166822	2285	11	19308	3.84086	1	0.765087	0.756382
GOTERM_BP_DIRECT	GO:0006915~apoptotic process	88	3.38592	0.0326973	ENSG00000148481, ENSG00000185825, ENSG00000107731, ENSG00000106009, ENSG00000023572, ENSG00000076984, ENSG00000066468, ENSG00000099860, ENSG00000135002, ENSG00000180370, ENSG00000177606, ENSG00000119682, ENSG00000006432, ENSG00000088808, ENSG00000171862, ENSG00000119048, ENSG00000115310, ENSG00000120159, ENSG00000143878, ENSG00000149930, ENSG00000054523, ENSG00000153071, ENSG00000163602, ENSG0000…	2285	607	19308	1.22503	1	0.765087	0.756382
GOTERM_BP_DIRECT	GO:0051560~mitochondrial calcium ion homeostasis	6	0.230858	0.0328973	ENSG00000165650, ENSG00000089060, ENSG00000141385, ENSG00000107745, ENSG00000165487, ENSG00000183172	2285	16	19308	3.16871	1	0.765087	0.756382
GOTERM_BP_DIRECT	GO:0009083~branched-chain amino acid catabolic process	6	0.230858	0.0328973	ENSG00000106049, ENSG00000083123, ENSG00000151498, ENSG00000137992, ENSG00000127884, ENSG00000160785	2285	16	19308	3.16871	1	0.765087	0.756382
GOTERM_BP_DIRECT	GO:0046688~response to copper ion	6	0.230858	0.0328973	ENSG00000142168, ENSG00000213398, ENSG00000134013, ENSG00000072274, ENSG00000145730, ENSG00000198727	2285	16	19308	3.16871	1	0.765087	0.756382
GOTERM_BP_DIRECT	GO:1903830~magnesium ion transmembrane transport	6	0.230858	0.0328973	ENSG00000163293, ENSG00000136052, ENSG00000186908, ENSG00000001461, ENSG00000158158, ENSG00000102158	2285	16	19308	3.16871	1	0.765087	0.756382
GOTERM_BP_DIRECT	GO:0048490~anterograde synaptic vesicle transport	6	0.230858	0.0328973	ENSG00000132842, ENSG00000196072, ENSG00000186222, ENSG00000065000, ENSG00000103723, ENSG00000143553	2285	16	19308	3.16871	1	0.765087	0.756382
GOTERM_BP_DIRECT	GO:0006469~negative regulation of protein kinase activity	15	0.577145	0.0330284	ENSG00000103197, ENSG00000196262, ENSG00000178209, ENSG00000178913, ENSG00000180370, ENSG00000099860, ENSG00000084207, ENSG00000132376, ENSG00000170027, ENSG00000018408, ENSG00000185420, ENSG00000100744, ENSG00000187446, ENSG00000070018, ENSG00000140992	2285	70	19308	1.81069	1	0.765158	0.756453
GOTERM_BP_DIRECT	GO:0009411~response to UV	11	0.42324	0.0346477	ENSG00000107643, ENSG00000225830, ENSG00000099622, ENSG00000077721, ENSG00000076984, ENSG00000164305, ENSG00000121691, ENSG00000163945, ENSG00000130939, ENSG00000119048, ENSG00000132356	2285	45	19308	2.06553	1	0.799573	0.790477
GOTERM_BP_DIRECT	GO:0032435~negative regulation of proteasomal ubiquitin-dependent protein catabolic process	9	0.346287	0.035021	ENSG00000147162, ENSG00000171100, ENSG00000163602, ENSG00000123159, ENSG00000105373, ENSG00000273841, ENSG00000166963, ENSG00000137575, ENSG00000124486	2285	33	19308	2.30452	1	0.801994	0.792869
GOTERM_BP_DIRECT	GO:0001707~mesoderm formation	9	0.346287	0.035021	ENSG00000204217, ENSG00000198431, ENSG00000128791, ENSG00000115170, ENSG00000112658, ENSG00000126705, ENSG00000151348, ENSG00000143178, ENSG00000186866	2285	33	19308	2.30452	1	0.801994	0.792869
GOTERM_BP_DIRECT	GO:0048813~dendrite morphogenesis	10	0.384763	0.0351835	ENSG00000073921, ENSG00000182606, ENSG00000150093, ENSG00000141503, ENSG00000106460, ENSG00000010810, ENSG00000134313, ENSG00000100320, ENSG00000136754, ENSG00000115993	2285	39	19308	2.16664	1	0.802639	0.793508
GOTERM_BP_DIRECT	GO:1902600~hydrogen ion transmembrane transport	25	0.961908	0.0364216	ENSG00000071553, ENSG00000177542, ENSG00000040531, ENSG00000113732, ENSG00000111775, ENSG00000198727, ENSG00000117410, ENSG00000198938, ENSG00000151729, ENSG00000147416, ENSG00000182220, ENSG00000123643, ENSG00000033627, ENSG00000163406, ENSG00000090020, ENSG00000066230, ENSG00000159720, ENSG00000148290, ENSG00000114573, ENSG00000169359, ENSG00000189043, ENSG00000100554, ENSG00000163399, ENSG0000…	2285	139	19308	1.51976	1	0.827725	0.818308
GOTERM_BP_DIRECT	GO:0009791~post-embryonic development	15	0.577145	0.0368229	ENSG00000198198, ENSG00000284770, ENSG00000105649, ENSG00000066468, ENSG00000159256, ENSG00000204120, ENSG00000122729, ENSG00000117139, ENSG00000080815, ENSG00000136381, ENSG00000149311, ENSG00000163659, ENSG00000108588, ENSG00000197081, ENSG00000104331	2285	71	19308	1.78519	1	0.82814	0.818718
GOTERM_BP_DIRECT	GO:0010977~negative regulation of neuron projection development	15	0.577145	0.0368229	ENSG00000178950, ENSG00000105426, ENSG00000135916, ENSG00000113657, ENSG00000007944, ENSG00000171862, ENSG00000196924, ENSG00000144724, ENSG00000007168, ENSG00000153071, ENSG00000078699, ENSG00000125676, ENSG00000165699, ENSG00000125266, ENSG00000143553	2285	71	19308	1.78519	1	0.82814	0.818718
GOTERM_BP_DIRECT	GO:0007049~cell cycle	55	2.1162	0.0376467	ENSG00000132612, ENSG00000113812, ENSG00000243156, ENSG00000152942, ENSG00000143479, ENSG00000007168, ENSG00000143514, ENSG00000100865, ENSG00000090565, ENSG00000255302, ENSG00000074319, ENSG00000126581, ENSG00000198492, ENSG00000129055, ENSG00000265972, ENSG00000067208, ENSG00000144635, ENSG00000120129, ENSG00000079335, ENSG00000182154, ENSG00000127955, ENSG00000185621, ENSG00000100014, ENSG0000…	2285	359	19308	1.29455	1	0.82814	0.818718
GOTERM_BP_DIRECT	GO:0016079~synaptic vesicle exocytosis	7	0.269334	0.0381808	ENSG00000101152, ENSG00000116473, ENSG00000220205, ENSG00000186111, ENSG00000105649, ENSG00000143553, ENSG00000081803	2285	22	19308	2.6886	1	0.82814	0.818718
GOTERM_BP_DIRECT	GO:0010613~positive regulation of cardiac muscle hypertrophy	7	0.269334	0.0381808	ENSG00000134318, ENSG00000126581, ENSG00000090020, ENSG00000105887, ENSG00000154229, ENSG00000134352, ENSG00000151239	2285	22	19308	2.6886	1	0.82814	0.818718
GOTERM_BP_DIRECT	GO:0006998~nuclear envelope organization	7	0.269334	0.0381808	ENSG00000061656, ENSG00000160789, ENSG00000132612, ENSG00000164828, ENSG00000104936, ENSG00000111224, ENSG00000166822	2285	22	19308	2.6886	1	0.82814	0.818718
GOTERM_BP_DIRECT	GO:0010821~regulation of mitochondrion organization	7	0.269334	0.0381808	ENSG00000187531, ENSG00000161011, ENSG00000158828, ENSG00000159363, ENSG00000069329, ENSG00000140983, ENSG00000138698	2285	22	19308	2.6886	1	0.82814	0.818718
GOTERM_BP_DIRECT	GO:1901214~regulation of neuron death	7	0.269334	0.0381808	ENSG00000183735, ENSG00000170315, ENSG00000120885, ENSG00000133818, ENSG00000187446, ENSG00000165699, ENSG00000135766	2285	22	19308	2.6886	1	0.82814	0.818718
GOTERM_BP_DIRECT	GO:1903076~regulation of protein localization to plasma membrane	7	0.269334	0.0381808	ENSG00000157978, ENSG00000132612, ENSG00000079950, ENSG00000112425, ENSG00000100568, ENSG00000145675, ENSG00000153786	2285	22	19308	2.6886	1	0.82814	0.818718
GOTERM_BP_DIRECT	GO:0039702~viral budding via host ESCRT complex	7	0.269334	0.0381808	ENSG00000132612, ENSG00000160948, ENSG00000119541, ENSG00000170248, ENSG00000074319, ENSG00000147457, ENSG00000255112	2285	22	19308	2.6886	1	0.82814	0.818718
GOTERM_BP_DIRECT	GO:1905706~regulation of mitochondrial ATP synthesis coupled proton transport	3	0.115429	0.0386567	ENSG00000176410, ENSG00000150756, ENSG00000103254	2285	3	19308	8.44989	1	0.82814	0.818718
GOTERM_BP_DIRECT	GO:0070541~response to platinum ion	3	0.115429	0.0386567	ENSG00000066926, ENSG00000148218, ENSG00000188690	2285	3	19308	8.44989	1	0.82814	0.818718
GOTERM_BP_DIRECT	GO:1903984~positive regulation of TRAIL-activated apoptotic signaling pathway	3	0.115429	0.0386567	ENSG00000100234, ENSG00000162772, ENSG00000171862	2285	3	19308	8.44989	1	0.82814	0.818718
GOTERM_BP_DIRECT	GO:1901031~regulation of response to reactive oxygen species	3	0.115429	0.0386567	ENSG00000130766, ENSG00000080546, ENSG00000149212	2285	3	19308	8.44989	1	0.82814	0.818718
GOTERM_BP_DIRECT	GO:1904381~Golgi apparatus mannose trimming	3	0.115429	0.0386567	ENSG00000198162, ENSG00000111885, ENSG00000117643	2285	3	19308	8.44989	1	0.82814	0.818718
GOTERM_BP_DIRECT	GO:1903614~negative regulation of protein tyrosine phosphatase activity	3	0.115429	0.0386567	ENSG00000114353, ENSG00000152127, ENSG00000131981	2285	3	19308	8.44989	1	0.82814	0.818718
GOTERM_BP_DIRECT	GO:0032355~response to estradiol	21	0.808003	0.0388242	ENSG00000131711, ENSG00000112964, ENSG00000173153, ENSG00000265972, ENSG00000084207, ENSG00000179218, ENSG00000171862, ENSG00000136854, ENSG00000118523, ENSG00000167468, ENSG00000168036, ENSG00000120129, ENSG00000164305, ENSG00000102996, ENSG00000121691, ENSG00000130707, ENSG00000145730, ENSG00000167658, ENSG00000141644, ENSG00000233276, ENSG00000181019	2285	112	19308	1.58435	1	0.828758	0.819329
GOTERM_BP_DIRECT	GO:0030200~heparan sulfate proteoglycan catabolic process	4	0.153905	0.0400773	ENSG00000181523, ENSG00000165102, ENSG00000241489, ENSG00000063660, ENSG00000010404	2285	7	19308	4.82851	1	0.83756	0.828031
GOTERM_BP_DIRECT	GO:1903573~negative regulation of response to endoplasmic reticulum stress	4	0.153905	0.0400773	ENSG00000178301, ENSG00000120885, ENSG00000111684, ENSG00000109501	2285	7	19308	4.82851	1	0.83756	0.828031
GOTERM_BP_DIRECT	GO:0072673~lamellipodium morphogenesis	4	0.153905	0.0400773	ENSG00000028528, ENSG00000205302, ENSG00000099331, ENSG00000136754	2285	7	19308	4.82851	1	0.83756	0.828031
GOTERM_BP_DIRECT	GO:0016240~autophagosome docking	4	0.153905	0.0400773	ENSG00000198668, ENSG00000174437, ENSG00000126775, ENSG00000136874	2285	7	19308	4.82851	1	0.83756	0.828031
GOTERM_BP_DIRECT	GO:0035022~positive regulation of Rac protein signal transduction	4	0.153905	0.0400773	ENSG00000051382, ENSG00000003393, ENSG00000146425, ENSG00000115310	2285	7	19308	4.82851	1	0.83756	0.828031
GOTERM_BP_DIRECT	GO:0016191~synaptic vesicle uncoating	4	0.153905	0.0400773	ENSG00000159082, ENSG00000178950, ENSG00000141985, ENSG00000116675	2285	7	19308	4.82851	1	0.83756	0.828031
GOTERM_BP_DIRECT	GO:0007420~brain development	43	1.65448	0.0405616	ENSG00000198561, ENSG00000186716, ENSG00000070961, ENSG00000115839, ENSG00000176410, ENSG00000040531, ENSG00000164190, ENSG00000036054, ENSG00000067836, ENSG00000115310, ENSG00000175866, ENSG00000168092, ENSG00000167720, ENSG00000204217, ENSG00000170525, ENSG00000116266, ENSG00000102805, ENSG00000144724, ENSG00000151929, ENSG00000168374, ENSG00000185950, ENSG00000163348, ENSG00000123983, ENSG0000…	2285	271	19308	1.34076	1	0.844727	0.835117
GOTERM_BP_DIRECT	GO:0048008~platelet-derived growth factor receptor signaling pathway	9	0.346287	0.0412117	ENSG00000186716, ENSG00000011405, ENSG00000157483, ENSG00000107372, ENSG00000179295, ENSG00000163659, ENSG00000265972, ENSG00000171862, ENSG00000050820	2285	34	19308	2.23674	1	0.852326	0.842629
GOTERM_BP_DIRECT	GO:0071108~protein K48-linked deubiquitination	9	0.346287	0.0412117	ENSG00000155313, ENSG00000148481, ENSG00000264522, ENSG00000136878, ENSG00000135655, ENSG00000068308, ENSG00000066427, ENSG00000115464, ENSG00000124486	2285	34	19308	2.23674	1	0.852326	0.842629
GOTERM_BP_DIRECT	GO:0030330~DNA damage response, signal transduction by p53 class mediator	6	0.230858	0.0421919	ENSG00000118689, ENSG00000130766, ENSG00000177076, ENSG00000170836, ENSG00000085224, ENSG00000196586	2285	17	19308	2.98231	1	0.865758	0.855908
GOTERM_BP_DIRECT	GO:0048009~insulin-like growth factor receptor signaling pathway	6	0.230858	0.0421919	ENSG00000150938, ENSG00000103197, ENSG00000112964, ENSG00000204120, ENSG00000145675, ENSG00000197081	2285	17	19308	2.98231	1	0.865758	0.855908
GOTERM_BP_DIRECT	GO:0000226~microtubule cytoskeleton organization	24	0.923432	0.0422957	ENSG00000100271, ENSG00000154114, ENSG00000131711, ENSG00000284770, ENSG00000176014, ENSG00000075413, ENSG00000114999, ENSG00000112659, ENSG00000111640, ENSG00000037042, ENSG00000137267, ENSG00000066427, ENSG00000135720, ENSG00000140463, ENSG00000144635, ENSG00000159140, ENSG00000007168, ENSG00000167552, ENSG00000079335, ENSG00000143924, ENSG00000138162, ENSG00000141380, ENSG00000141556, ENSG0000…	2285	134	19308	1.51341	1	0.865758	0.855908
GOTERM_BP_DIRECT	GO:0030097~hemopoiesis	14	0.538669	0.043531	ENSG00000073921, ENSG00000128791, ENSG00000099875, ENSG00000158828, ENSG00000147162, ENSG00000065883, ENSG00000166272, ENSG00000068724, ENSG00000168283, ENSG00000067836, ENSG00000159216, ENSG00000013375, ENSG00000163659, ENSG00000163346	2285	66	19308	1.7924	1	0.888002	0.877899
GOTERM_BP_DIRECT	GO:0021702~cerebellar Purkinje cell differentiation	5	0.192382	0.044288	ENSG00000100271, ENSG00000165240, ENSG00000103657, ENSG00000164209, ENSG00000135049	2285	12	19308	3.52079	1	0.894288	0.884114
GOTERM_BP_DIRECT	GO:0006739~NADP metabolic process	5	0.192382	0.044288	ENSG00000115129, ENSG00000160211, ENSG00000065833, ENSG00000169738, ENSG00000138413	2285	12	19308	3.52079	1	0.894288	0.884114
GOTERM_BP_DIRECT	GO:0034333~adherens junction assembly	5	0.192382	0.044288	ENSG00000168036, ENSG00000186111, ENSG00000180370, ENSG00000141556, ENSG00000035403	2285	12	19308	3.52079	1	0.894288	0.884114
GOTERM_BP_DIRECT	GO:0006979~response to oxidative stress	22	0.846479	0.0456982	ENSG00000107643, ENSG00000100292, ENSG00000158828, ENSG00000177556, ENSG00000080815, ENSG00000138413, ENSG00000006534, ENSG00000171503, ENSG00000167468, ENSG00000088812, ENSG00000225830, ENSG00000001084, ENSG00000117450, ENSG00000003393, ENSG00000100983, ENSG00000103415, ENSG00000089057, ENSG00000271303, ENSG00000148218, ENSG00000233276, ENSG00000181019, ENSG00000048392	2285	121	19308	1.53634	1	0.919657	0.909194
GOTERM_BP_DIRECT	GO:0006687~glycosphingolipid metabolic process	7	0.269334	0.046656	ENSG00000166311, ENSG00000070610, ENSG00000100422, ENSG00000170266, ENSG00000196743, ENSG00000144455, ENSG00000162139	2285	23	19308	2.57171	1	0.929543	0.918967
GOTERM_BP_DIRECT	GO:0006509~membrane protein ectodomain proteolysis	7	0.269334	0.046656	ENSG00000100345, ENSG00000137845, ENSG00000186318, ENSG00000005206, ENSG00000080815, ENSG00000173402, ENSG00000138600	2285	23	19308	2.57171	1	0.929543	0.918967
GOTERM_BP_DIRECT	GO:0071985~multivesicular body sorting pathway	7	0.269334	0.046656	ENSG00000132612, ENSG00000119541, ENSG00000170248, ENSG00000147457, ENSG00000131475, ENSG00000255112, ENSG00000145016	2285	23	19308	2.57171	1	0.929543	0.918967
GOTERM_BP_DIRECT	GO:0042127~regulation of cell proliferation	28	1.07734	0.0470463	ENSG00000176396, ENSG00000127483, ENSG00000161714, ENSG00000109756, ENSG00000104205, ENSG00000101190, ENSG00000177606, ENSG00000171223, ENSG00000173801, ENSG00000135269, ENSG00000137203, ENSG00000204217, ENSG00000146826, ENSG00000143178, ENSG00000100320, ENSG00000140961, ENSG00000033800, ENSG00000130522, ENSG00000130702, ENSG00000173153, ENSG00000108819, ENSG00000265972, ENSG00000118762, ENSG0000…	2285	164	19308	1.44266	1	0.934205	0.923576
GOTERM_BP_DIRECT	GO:0001525~angiogenesis	40	1.53905	0.0478355	ENSG00000172270, ENSG00000107731, ENSG00000161714, ENSG00000136999, ENSG00000130812, ENSG00000249915, ENSG00000066468, ENSG00000154229, ENSG00000177606, ENSG00000135821, ENSG00000171862, ENSG00000135048, ENSG00000112062, ENSG00000143878, ENSG00000143537, ENSG00000115170, ENSG00000100345, ENSG00000140545, ENSG00000106025, ENSG00000184009, ENSG00000181555, ENSG00000071246, ENSG00000100292, ENSG0000…	2285	252	19308	1.34125	1	0.939264	0.928578
GOTERM_BP_DIRECT	GO:0008283~cell proliferation	31	1.19277	0.0480179	ENSG00000107798, ENSG00000106009, ENSG00000115758, ENSG00000177606, ENSG00000135821, ENSG00000132475, ENSG00000136238, ENSG00000137642, ENSG00000148926, ENSG00000119801, ENSG00000117450, ENSG00000163041, ENSG00000185651, ENSG00000148344, ENSG00000180900, ENSG00000183258, ENSG00000108465, ENSG00000175130, ENSG00000198431, ENSG00000167193, ENSG00000171552, ENSG00000135414, ENSG00000114353, ENSG0000…	2285	186	19308	1.40832	1	0.939264	0.928578
GOTERM_BP_DIRECT	GO:0010043~response to zinc ion	9	0.346287	0.0480868	ENSG00000165240, ENSG00000165915, ENSG00000180902, ENSG00000130707, ENSG00000145730, ENSG00000171862, ENSG00000148218, ENSG00000111144, ENSG00000104154	2285	35	19308	2.17283	1	0.939264	0.928578
GOTERM_BP_DIRECT	GO:0046034~ATP metabolic process	9	0.346287	0.0480868	ENSG00000147416, ENSG00000187097, ENSG00000008130, ENSG00000204389, ENSG00000204388, ENSG00000165280, ENSG00000040531, ENSG00000114573, ENSG00000143774	2285	35	19308	2.17283	1	0.939264	0.928578
GOTERM_BP_DIRECT	GO:0097192~extrinsic apoptotic signaling pathway in absence of ligand	9	0.346287	0.0480868	ENSG00000118689, ENSG00000151929, ENSG00000099875, ENSG00000153094, ENSG00000082701, ENSG00000143384, ENSG00000171552, ENSG00000044115, ENSG00000165943	2285	35	19308	2.17283	1	0.939264	0.928578
GOTERM_BP_DIRECT	GO:0071456~cellular response to hypoxia	25	0.961908	0.0485024	ENSG00000127483, ENSG00000160789, ENSG00000104765, ENSG00000158828, ENSG00000068903, ENSG00000135766, ENSG00000171862, ENSG00000115310, ENSG00000132356, ENSG00000165240, ENSG00000148400, ENSG00000105373, ENSG00000251562, ENSG00000141279, ENSG00000089163, ENSG00000130522, ENSG00000090020, ENSG00000100292, ENSG00000168140, ENSG00000135018, ENSG00000170345, ENSG00000118689, ENSG00000149428, ENSG0000…	2285	143	19308	1.47725	1	0.944295	0.933552
GOTERM_BP_DIRECT	GO:0090398~cellular senescence	12	0.461716	0.0488587	ENSG00000112062, ENSG00000107643, ENSG00000164442, ENSG00000160789, ENSG00000115738, ENSG00000076984, ENSG00000112658, ENSG00000149311, ENSG00000108175, ENSG00000179218, ENSG00000065559, ENSG00000124762	2285	54	19308	1.87775	1	0.94671	0.935939
GOTERM_BP_DIRECT	GO:0016042~lipid catabolic process	19	0.73105	0.0489432	ENSG00000107798, ENSG00000105223, ENSG00000161714, ENSG00000075785, ENSG00000138744, ENSG00000075651, ENSG00000204386, ENSG00000177666, ENSG00000118961, ENSG00000168092, ENSG00000100439, ENSG00000123739, ENSG00000184381, ENSG00000007168, ENSG00000135241, ENSG00000138193, ENSG00000129219, ENSG00000162139, ENSG00000164535	2285	101	19308	1.58958	1	0.94671	0.935939
GOTERM_BP_DIRECT	GO:0006457~protein folding	29	1.11581	0.0494709	ENSG00000196262, ENSG00000164070, ENSG00000113312, ENSG00000023318, ENSG00000115275, ENSG00000151929, ENSG00000088832, ENSG00000116260, ENSG00000089248, ENSG00000168938, ENSG00000186687, ENSG00000168439, ENSG00000141556, ENSG00000108588, ENSG00000015676, ENSG00000153201, ENSG00000105401, ENSG00000284770, ENSG00000162616, ENSG00000114857, ENSG00000114698, ENSG00000132002, ENSG00000179218, ENSG0000…	2285	172	19308	1.42469	1	0.95383	0.942978
GOTERM_BP_DIRECT	GO:0001933~negative regulation of protein phosphorylation	16	0.615621	0.0513014	ENSG00000154059, ENSG00000196262, ENSG00000163629, ENSG00000132376, ENSG00000197822, ENSG00000171862, ENSG00000154710, ENSG00000110880, ENSG00000018408, ENSG00000008294, ENSG00000166848, ENSG00000187446, ENSG00000070018, ENSG00000126775, ENSG00000124762, ENSG00000108465	2285	81	19308	1.66911	1	0.985943	0.974726
GOTERM_BP_DIRECT	GO:0045860~positive regulation of protein kinase activity	13	0.500192	0.0515646	ENSG00000076604, ENSG00000109756, ENSG00000151893, ENSG00000173402, ENSG00000084764, ENSG00000142871, ENSG00000116473, ENSG00000161010, ENSG00000181929, ENSG00000003393, ENSG00000183087, ENSG00000124145, ENSG00000124762	2285	61	19308	1.8008	1	0.987826	0.976588
GOTERM_BP_DIRECT	GO:0051492~regulation of stress fiber assembly	6	0.230858	0.0529105	ENSG00000134318, ENSG00000140463, ENSG00000090020, ENSG00000165699, ENSG00000136238, ENSG00000184009	2285	18	19308	2.81663	1	0.997621	0.986271
GOTERM_BP_DIRECT	GO:2001224~positive regulation of neuron migration	6	0.230858	0.0529105	ENSG00000187164, ENSG00000196924, ENSG00000103264, ENSG00000109756, ENSG00000162065, ENSG00000164190	2285	18	19308	2.81663	1	0.997621	0.986271
GOTERM_BP_DIRECT	GO:0051642~centrosome localization	6	0.230858	0.0529105	ENSG00000153201, ENSG00000100503, ENSG00000170759, ENSG00000164828, ENSG00000166579, ENSG00000135720	2285	18	19308	2.81663	1	0.997621	0.986271
GOTERM_BP_DIRECT	GO:0048193~Golgi vesicle transport	6	0.230858	0.0529105	ENSG00000007255, ENSG00000008256, ENSG00000006715, ENSG00000204991, ENSG00000182400, ENSG00000149823	2285	18	19308	2.81663	1	0.997621	0.986271
GOTERM_BP_DIRECT	GO:0019076~viral release from host cell	6	0.230858	0.0529105	ENSG00000196262, ENSG00000132612, ENSG00000075785, ENSG00000116525, ENSG00000182149, ENSG00000074319	2285	18	19308	2.81663	1	0.997621	0.986271
GOTERM_BP_DIRECT	GO:0030334~regulation of cell migration	20	0.769527	0.0532665	ENSG00000129474, ENSG00000160789, ENSG00000113838, ENSG00000182957, ENSG00000104205, ENSG00000130702, ENSG00000113657, ENSG00000196576, ENSG00000136238, ENSG00000115310, ENSG00000196924, ENSG00000166025, ENSG00000171877, ENSG00000034510, ENSG00000143878, ENSG00000130827, ENSG00000135919, ENSG00000141503, ENSG00000140961, ENSG00000035403	2285	109	19308	1.55044	1	1	0.988788
GOTERM_BP_DIRECT	GO:0010595~positive regulation of endothelial cell migration	14	0.538669	0.0536113	ENSG00000172270, ENSG00000134318, ENSG00000213015, ENSG00000249915, ENSG00000154229, ENSG00000179218, ENSG00000136238, ENSG00000204217, ENSG00000030582, ENSG00000143878, ENSG00000051382, ENSG00000161671, ENSG00000127837, ENSG00000050820	2285	68	19308	1.73968	1	1	0.988788
GOTERM_BP_DIRECT	GO:0001934~positive regulation of protein phosphorylation	34	1.3082	0.0540745	ENSG00000134318, ENSG00000196262, ENSG00000106009, ENSG00000158828, ENSG00000134452, ENSG00000173542, ENSG00000171720, ENSG00000065559, ENSG00000136238, ENSG00000166971, ENSG00000141551, ENSG00000184381, ENSG00000089248, ENSG00000121989, ENSG00000153071, ENSG00000161202, ENSG00000105270, ENSG00000141736, ENSG00000126775, ENSG00000142961, ENSG00000182208, ENSG00000154310, ENSG00000023287, ENSG0000…	2285	210	19308	1.36808	1	1	0.988788
GOTERM_BP_DIRECT	GO:0031334~positive regulation of protein complex assembly	12	0.461716	0.0548096	ENSG00000254999, ENSG00000129474, ENSG00000155366, ENSG00000120885, ENSG00000104081, ENSG00000165280, ENSG00000153094, ENSG00000113851, ENSG00000082701, ENSG00000072274, ENSG00000171368, ENSG00000131981	2285	55	19308	1.84361	1	1	0.988788
GOTERM_BP_DIRECT	GO:0007010~cytoskeleton organization	25	0.961908	0.055527	ENSG00000111859, ENSG00000197296, ENSG00000143093, ENSG00000243156, ENSG00000105738, ENSG00000086015, ENSG00000138193, ENSG00000171914, ENSG00000163867, ENSG00000100266, ENSG00000129474, ENSG00000154310, ENSG00000198752, ENSG00000108091, ENSG00000139132, ENSG00000165650, ENSG00000172757, ENSG00000062598, ENSG00000141084, ENSG00000188157, ENSG00000129219, ENSG00000010017, ENSG00000160226, ENSG0000…	2285	145	19308	1.45688	1	1	0.988788
GOTERM_BP_DIRECT	GO:0051017~actin filament bundle assembly	9	0.346287	0.0556658	ENSG00000133789, ENSG00000111859, ENSG00000172725, ENSG00000113657, ENSG00000120756, ENSG00000151491, ENSG00000187017, ENSG00000075618, ENSG00000175866	2285	36	19308	2.11247	1	1	0.988788
GOTERM_BP_DIRECT	GO:0048675~axon extension	9	0.346287	0.0556658	ENSG00000131711, ENSG00000177169, ENSG00000107758, ENSG00000150093, ENSG00000273749, ENSG00000112658, ENSG00000138623, ENSG00000035403, ENSG00000124486	2285	36	19308	2.11247	1	1	0.988788
GOTERM_BP_DIRECT	GO:0006471~protein ADP-ribosylation	7	0.269334	0.0562062	ENSG00000107854, ENSG00000173273, ENSG00000168374, ENSG00000142082, ENSG00000163659, ENSG00000068903, ENSG00000089163	2285	24	19308	2.46455	1	1	0.988788
GOTERM_BP_DIRECT	GO:0007020~microtubule nucleation	7	0.269334	0.0562062	ENSG00000196072, ENSG00000141551, ENSG00000127914, ENSG00000037042, ENSG00000166579, ENSG00000010017, ENSG00000128159	2285	24	19308	2.46455	1	1	0.988788
GOTERM_BP_DIRECT	GO:2000378~negative regulation of reactive oxygen species metabolic process	7	0.269334	0.0562062	ENSG00000126581, ENSG00000186716, ENSG00000158828, ENSG00000142082, ENSG00000160211, ENSG00000068903, ENSG00000137203	2285	24	19308	2.46455	1	1	0.988788
GOTERM_BP_DIRECT	GO:0018230~peptidyl-L-cysteine S-palmitoylation	7	0.269334	0.0562062	ENSG00000174165, ENSG00000186908, ENSG00000105270, ENSG00000163812, ENSG00000175048, ENSG00000153786, ENSG00000180776	2285	24	19308	2.46455	1	1	0.988788
GOTERM_BP_DIRECT	GO:0030148~sphingolipid biosynthetic process	11	0.42324	0.0580528	ENSG00000143753, ENSG00000118402, ENSG00000165389, ENSG00000067113, ENSG00000172296, ENSG00000177076, ENSG00000163590, ENSG00000066322, ENSG00000100596, ENSG00000198964, ENSG00000006534	2285	49	19308	1.89691	1	1	0.988788
GOTERM_BP_DIRECT	GO:0032968~positive regulation of transcription elongation from RNA polymerase II promoter	11	0.42324	0.0580528	ENSG00000112282, ENSG00000168036, ENSG00000063322, ENSG00000065883, ENSG00000109111, ENSG00000114503, ENSG00000129518, ENSG00000156603, ENSG00000161920, ENSG00000133398, ENSG00000124641	2285	49	19308	1.89691	1	1	0.988788
GOTERM_BP_DIRECT	GO:1903358~regulation of Golgi organization	5	0.192382	0.0581514	ENSG00000178104, ENSG00000127914, ENSG00000172007, ENSG00000079805, ENSG00000162236	2285	13	19308	3.24996	1	1	0.988788
GOTERM_BP_DIRECT	GO:0060765~regulation of androgen receptor signaling pathway	5	0.192382	0.0581514	ENSG00000013561, ENSG00000160310, ENSG00000107077, ENSG00000108654, ENSG00000130254	2285	13	19308	3.24996	1	1	0.988788
GOTERM_BP_DIRECT	GO:0048011~neurotrophin TRK receptor signaling pathway	5	0.192382	0.0581514	ENSG00000173805, ENSG00000134243, ENSG00000164305, ENSG00000179295, ENSG00000050820	2285	13	19308	3.24996	1	1	0.988788
GOTERM_BP_DIRECT	GO:0019430~removal of superoxide radicals	5	0.192382	0.0581514	ENSG00000142168, ENSG00000165240, ENSG00000117450, ENSG00000173992, ENSG00000181019	2285	13	19308	3.24996	1	1	0.988788
GOTERM_BP_DIRECT	GO:0035331~negative regulation of hippo signaling	5	0.192382	0.0581514	ENSG00000112062, ENSG00000129474, ENSG00000047644, ENSG00000075413, ENSG00000144560	2285	13	19308	3.24996	1	1	0.988788
GOTERM_BP_DIRECT	GO:0090385~phagosome-lysosome fusion	5	0.192382	0.0581514	ENSG00000134108, ENSG00000115020, ENSG00000127419, ENSG00000075785, ENSG00000151445	2285	13	19308	3.24996	1	1	0.988788
GOTERM_BP_DIRECT	GO:0006658~phosphatidylserine metabolic process	4	0.153905	0.0585922	ENSG00000103066, ENSG00000164300, ENSG00000132824, ENSG00000111897	2285	8	19308	4.22495	1	1	0.988788
GOTERM_BP_DIRECT	GO:0017145~stem cell division	4	0.153905	0.0585922	ENSG00000018408, ENSG00000007168, ENSG00000182197, ENSG00000125676	2285	8	19308	4.22495	1	1	0.988788
GOTERM_BP_DIRECT	GO:1900364~negative regulation of mRNA polyadenylation	4	0.153905	0.0585922	ENSG00000198730, ENSG00000100722, ENSG00000155827, ENSG00000196235	2285	8	19308	4.22495	1	1	0.988788
GOTERM_BP_DIRECT	GO:1903071~positive regulation of ER-associated ubiquitin-dependent protein catabolic process	4	0.153905	0.0585922	ENSG00000051108, ENSG00000185825, ENSG00000188021, ENSG00000135018	2285	8	19308	4.22495	1	1	0.988788
GOTERM_BP_DIRECT	GO:0048311~mitochondrion distribution	4	0.153905	0.0585922	ENSG00000173805, ENSG00000182606, ENSG00000171100, ENSG00000115993	2285	8	19308	4.22495	1	1	0.988788
GOTERM_BP_DIRECT	GO:0045955~negative regulation of calcium ion-dependent exocytosis	4	0.153905	0.0585922	ENSG00000116266, ENSG00000148400, ENSG00000114353, ENSG00000127314	2285	8	19308	4.22495	1	1	0.988788
GOTERM_BP_DIRECT	GO:0032288~myelin assembly	4	0.153905	0.0585922	ENSG00000115020, ENSG00000112367, ENSG00000063660, ENSG00000171368	2285	8	19308	4.22495	1	1	0.988788
GOTERM_BP_DIRECT	GO:0001514~selenocysteine incorporation	4	0.153905	0.0585922	ENSG00000138593, ENSG00000132394, ENSG00000187742, ENSG00000198843	2285	8	19308	4.22495	1	1	0.988788
GOTERM_BP_DIRECT	GO:0002115~store-operated calcium entry	4	0.153905	0.0585922	ENSG00000175938, ENSG00000109689, ENSG00000167323, ENSG00000276045	2285	8	19308	4.22495	1	1	0.988788
GOTERM_BP_DIRECT	GO:0021987~cerebral cortex development	15	0.577145	0.0605257	ENSG00000172380, ENSG00000108953, ENSG00000105426, ENSG00000108819, ENSG00000167193, ENSG00000196924, ENSG00000167632, ENSG00000140463, ENSG00000007168, ENSG00000117394, ENSG00000138162, ENSG00000165699, ENSG00000070018, ENSG00000125124, ENSG00000145545	2285	76	19308	1.66774	1	1	0.988788
GOTERM_BP_DIRECT	GO:0048488~synaptic vesicle endocytosis	10	0.384763	0.0611727	ENSG00000159082, ENSG00000197959, ENSG00000220205, ENSG00000162065, ENSG00000186111, ENSG00000180900, ENSG00000006125, ENSG00000184009, ENSG00000079805, ENSG00000161203	2285	43	19308	1.96509	1	1	0.988788
GOTERM_BP_DIRECT	GO:0000038~very long-chain fatty acid metabolic process	6	0.230858	0.0650633	ENSG00000060971, ENSG00000151726, ENSG00000133835, ENSG00000101986, ENSG00000117528, ENSG00000161533	2285	19	19308	2.66839	1	1	0.988788
GOTERM_BP_DIRECT	GO:0061136~regulation of proteasomal protein catabolic process	6	0.230858	0.0650633	ENSG00000166167, ENSG00000170315, ENSG00000112425, ENSG00000158828, ENSG00000008710, ENSG00000233276	2285	19	19308	2.66839	1	1	0.988788
GOTERM_BP_DIRECT	GO:0030050~vesicle transport along actin filament	6	0.230858	0.0650633	ENSG00000130402, ENSG00000157483, ENSG00000196586, ENSG00000137942, ENSG00000106299, ENSG00000176658	2285	19	19308	2.66839	1	1	0.988788
GOTERM_BP_DIRECT	GO:2000060~positive regulation of protein ubiquitination involved in ubiquitin-dependent protein catabolic process	6	0.230858	0.0650633	ENSG00000120885, ENSG00000165280, ENSG00000109670, ENSG00000170881, ENSG00000171862, ENSG00000135049	2285	19	19308	2.66839	1	1	0.988788
GOTERM_BP_DIRECT	GO:0006909~phagocytosis	14	0.538669	0.0651723	ENSG00000186716, ENSG00000150093, ENSG00000064687, ENSG00000116678, ENSG00000158985, ENSG00000110880, ENSG00000143669, ENSG00000062598, ENSG00000183087, ENSG00000186111, ENSG00000107560, ENSG00000086232, ENSG00000079805, ENSG00000145016	2285	70	19308	1.68998	1	1	0.988788
GOTERM_BP_DIRECT	GO:0006493~protein O-linked glycosylation	11	0.42324	0.0652036	ENSG00000164574, ENSG00000119514, ENSG00000182606, ENSG00000147162, ENSG00000141429, ENSG00000013375, ENSG00000109586, ENSG00000198408, ENSG00000115993, ENSG00000143641, ENSG00000162885	2285	50	19308	1.85898	1	1	0.988788
GOTERM_BP_DIRECT	GO:0043066~negative regulation of apoptotic process	75	2.88573	0.06558	ENSG00000180370, ENSG00000119682, ENSG00000082701, ENSG00000138834, ENSG00000181061, ENSG00000134352, ENSG00000084207, ENSG00000154447, ENSG00000171862, ENSG00000119048, ENSG00000139644, ENSG00000143479, ENSG00000151929, ENSG00000168374, ENSG00000153071, ENSG00000146066, ENSG00000181019, ENSG00000104067, ENSG00000107643, ENSG00000126581, ENSG00000113328, ENSG00000072274, ENSG00000171552, ENSG0000…	2285	526	19308	1.20483	1	1	0.988788
GOTERM_BP_DIRECT	GO:0060349~bone morphogenesis	8	0.307811	0.0660679	ENSG00000157933, ENSG00000164442, ENSG00000068078, ENSG00000066468, ENSG00000090863, ENSG00000102575, ENSG00000070018, ENSG00000137203	2285	31	19308	2.18062	1	1	0.988788
GOTERM_BP_DIRECT	GO:0035633~maintenance of permeability of blood-brain barrier	8	0.307811	0.0660679	ENSG00000150093, ENSG00000064651, ENSG00000157224, ENSG00000197822, ENSG00000035403, ENSG00000184009, ENSG00000104067, ENSG00000135862	2285	31	19308	2.18062	1	1	0.988788
GOTERM_BP_DIRECT	GO:1903955~positive regulation of protein targeting to mitochondrion	8	0.307811	0.0660679	ENSG00000158828, ENSG00000185651, ENSG00000164877, ENSG00000109670, ENSG00000175224, ENSG00000177479, ENSG00000141279, ENSG00000132356	2285	31	19308	2.18062	1	1	0.988788
GOTERM_BP_DIRECT	GO:0006520~cellular amino acid metabolic process	8	0.307811	0.0660679	ENSG00000167720, ENSG00000137274, ENSG00000100116, ENSG00000040531, ENSG00000100983, ENSG00000110455, ENSG00000137944, ENSG00000124299	2285	31	19308	2.18062	1	1	0.988788
GOTERM_BP_DIRECT	GO:0005977~glycogen metabolic process	8	0.307811	0.0660679	ENSG00000196182, ENSG00000067177, ENSG00000156873, ENSG00000112425, ENSG00000184203, ENSG00000082701, ENSG00000116678, ENSG00000134352	2285	31	19308	2.18062	1	1	0.988788
GOTERM_BP_DIRECT	GO:0040014~regulation of multicellular organism growth	7	0.269334	0.0668446	ENSG00000142168, ENSG00000158669, ENSG00000088812, ENSG00000141385, ENSG00000140718, ENSG00000107854, ENSG00000112964	2285	25	19308	2.36597	1	1	0.988788
GOTERM_BP_DIRECT	GO:1990138~neuron projection extension	7	0.269334	0.0668446	ENSG00000154059, ENSG00000156299, ENSG00000168036, ENSG00000130827, ENSG00000214078, ENSG00000166579, ENSG00000170017	2285	25	19308	2.36597	1	1	0.988788
GOTERM_BP_DIRECT	GO:0006656~phosphatidylcholine biosynthetic process	7	0.269334	0.0668446	ENSG00000158669, ENSG00000070214, ENSG00000213398, ENSG00000110721, ENSG00000111684, ENSG00000158201, ENSG00000161217	2285	25	19308	2.36597	1	1	0.988788
GOTERM_BP_DIRECT	GO:0051571~positive regulation of histone H3-K4 methylation	7	0.269334	0.0668446	ENSG00000025293, ENSG00000168036, ENSG00000137815, ENSG00000147162, ENSG00000198730, ENSG00000141646, ENSG00000114982	2285	25	19308	2.36597	1	1	0.988788
GOTERM_BP_DIRECT	GO:0060976~coronary vasculature development	7	0.269334	0.0668446	ENSG00000099139, ENSG00000105429, ENSG00000166847, ENSG00000107882, ENSG00000197603, ENSG00000006125, ENSG00000115234	2285	25	19308	2.36597	1	1	0.988788
GOTERM_BP_DIRECT	GO:0048589~developmental growth	7	0.269334	0.0668446	ENSG00000148926, ENSG00000284770, ENSG00000112658, ENSG00000164190, ENSG00000163348, ENSG00000141646, ENSG00000108175	2285	25	19308	2.36597	1	1	0.988788
GOTERM_BP_DIRECT	GO:0043087~regulation of GTPase activity	17	0.654098	0.0672735	ENSG00000129474, ENSG00000115839, ENSG00000196576, ENSG00000167193, ENSG00000067208, ENSG00000139132, ENSG00000142168, ENSG00000007255, ENSG00000165322, ENSG00000007168, ENSG00000003393, ENSG00000165219, ENSG00000130827, ENSG00000182400, ENSG00000146425, ENSG00000011454, ENSG00000100241	2285	91	19308	1.57855	1	1	0.988788
GOTERM_BP_DIRECT	GO:0046330~positive regulation of JNK cascade	18	0.692574	0.0673241	ENSG00000076604, ENSG00000154310, ENSG00000155760, ENSG00000023287, ENSG00000137802, ENSG00000076984, ENSG00000198961, ENSG00000099860, ENSG00000167193, ENSG00000138834, ENSG00000154447, ENSG00000065559, ENSG00000137575, ENSG00000118523, ENSG00000149930, ENSG00000141503, ENSG00000135090, ENSG00000104375	2285	98	19308	1.55202	1	1	0.988788
GOTERM_BP_DIRECT	GO:0051123~RNA polymerase II transcriptional preinitiation complex assembly	12	0.461716	0.0681112	ENSG00000112282, ENSG00000197780, ENSG00000063322, ENSG00000137947, ENSG00000165417, ENSG00000178913, ENSG00000166337, ENSG00000273841, ENSG00000156603, ENSG00000161920, ENSG00000133398, ENSG00000124641	2285	57	19308	1.77892	1	1	0.988788
GOTERM_BP_DIRECT	GO:0006406~mRNA export from nucleus	12	0.461716	0.0681112	ENSG00000070366, ENSG00000162231, ENSG00000160679, ENSG00000120533, ENSG00000198563, ENSG00000160294, ENSG00000091542, ENSG00000125676, ENSG00000114503, ENSG00000141543, ENSG00000122068, ENSG00000157106	2285	57	19308	1.77892	1	1	0.988788
GOTERM_BP_DIRECT	GO:0042307~positive regulation of protein import into nucleus	10	0.384763	0.0691825	ENSG00000112062, ENSG00000196924, ENSG00000068001, ENSG00000151929, ENSG00000130726, ENSG00000102898, ENSG00000171720, ENSG00000145675, ENSG00000173801, ENSG00000080815	2285	44	19308	1.92043	1	1	0.988788
GOTERM_BP_DIRECT	GO:1903553~positive regulation of extracellular exosome assembly	3	0.115429	0.0712859	ENSG00000137575, ENSG00000124145, ENSG00000170248	2285	4	19308	6.33742	1	1	0.988788
GOTERM_BP_DIRECT	GO:0031587~positive regulation of inositol 1,4,5-trisphosphate-sensitive calcium-release channel activity	3	0.115429	0.0712859	ENSG00000173805, ENSG00000197386, ENSG00000118762	2285	4	19308	6.33742	1	1	0.988788
GOTERM_BP_DIRECT	GO:0061723~glycophagy	3	0.115429	0.0712859	ENSG00000139112, ENSG00000023287, ENSG00000171298	2285	4	19308	6.33742	1	1	0.988788
GOTERM_BP_DIRECT	GO:0019388~galactose catabolic process	3	0.115429	0.0712859	ENSG00000213930, ENSG00000117308, ENSG00000170266	2285	4	19308	6.33742	1	1	0.988788
GOTERM_BP_DIRECT	GO:0061428~negative regulation of transcription from RNA polymerase II promoter in response to hypoxia	3	0.115429	0.0712859	ENSG00000166135, ENSG00000164442, ENSG00000068903	2285	4	19308	6.33742	1	1	0.988788
GOTERM_BP_DIRECT	GO:0046338~phosphatidylethanolamine catabolic process	3	0.115429	0.0712859	ENSG00000103066, ENSG00000184381, ENSG00000135241	2285	4	19308	6.33742	1	1	0.988788
GOTERM_BP_DIRECT	GO:0009051~pentose-phosphate shunt, oxidative branch	3	0.115429	0.0712859	ENSG00000049239, ENSG00000160211, ENSG00000142657	2285	4	19308	6.33742	1	1	0.988788
GOTERM_BP_DIRECT	GO:1904154~positive regulation of retrograde protein transport, ER to cytosol	3	0.115429	0.0712859	ENSG00000185825, ENSG00000134109, ENSG00000088298	2285	4	19308	6.33742	1	1	0.988788
GOTERM_BP_DIRECT	GO:0015917~aminophospholipid transport	3	0.115429	0.0712859	ENSG00000138760, ENSG00000112697, ENSG00000058063	2285	4	19308	6.33742	1	1	0.988788
GOTERM_BP_DIRECT	GO:0036510~trimming of terminal mannose on C branch	3	0.115429	0.0712859	ENSG00000134109, ENSG00000088298, ENSG00000177239	2285	4	19308	6.33742	1	1	0.988788
GOTERM_BP_DIRECT	GO:0018107~peptidyl-threonine phosphorylation	14	0.538669	0.0715265	ENSG00000183735, ENSG00000134318, ENSG00000107643, ENSG00000177169, ENSG00000198752, ENSG00000173273, ENSG00000154229, ENSG00000082701, ENSG00000060237, ENSG00000143479, ENSG00000115170, ENSG00000164715, ENSG00000013441, ENSG00000140992	2285	71	19308	1.66618	1	1	0.988788
GOTERM_BP_DIRECT	GO:0097284~hepatocyte apoptotic process	5	0.192382	0.0740443	ENSG00000111057, ENSG00000171552, ENSG00000170421, ENSG00000148180, ENSG00000104375	2285	14	19308	3.01782	1	1	0.988788
GOTERM_BP_DIRECT	GO:0030516~regulation of axon extension	5	0.192382	0.0740443	ENSG00000085733, ENSG00000080371, ENSG00000114999, ENSG00000082701, ENSG00000079805	2285	14	19308	3.01782	1	1	0.988788
GOTERM_BP_DIRECT	GO:0034383~low-density lipoprotein particle clearance	5	0.192382	0.0740443	ENSG00000107798, ENSG00000157978, ENSG00000057252, ENSG00000100292, ENSG00000110047	2285	14	19308	3.01782	1	1	0.988788
GOTERM_BP_DIRECT	GO:0032482~Rab protein signal transduction	5	0.192382	0.0740443	ENSG00000080371, ENSG00000137502, ENSG00000203879, ENSG00000172007, ENSG00000168118	2285	14	19308	3.01782	1	1	0.988788
GOTERM_BP_DIRECT	GO:0006515~misfolded or incompletely synthesized protein catabolic process	5	0.192382	0.0740443	ENSG00000104343, ENSG00000066427, ENSG00000103266, ENSG00000162378, ENSG00000160445	2285	14	19308	3.01782	1	1	0.988788
GOTERM_BP_DIRECT	GO:0045047~protein targeting to ER	5	0.192382	0.0740443	ENSG00000051108, ENSG00000134109, ENSG00000140319, ENSG00000111885, ENSG00000058262	2285	14	19308	3.01782	1	1	0.988788
GOTERM_BP_DIRECT	GO:0010717~regulation of epithelial to mesenchymal transition	5	0.192382	0.0740443	ENSG00000225663, ENSG00000156299, ENSG00000019144, ENSG00000173402, ENSG00000186866	2285	14	19308	3.01782	1	1	0.988788
GOTERM_BP_DIRECT	GO:0046323~glucose import	5	0.192382	0.0740443	ENSG00000112062, ENSG00000130766, ENSG00000117394, ENSG00000134243, ENSG00000165699	2285	14	19308	3.01782	1	1	0.988788
GOTERM_BP_DIRECT	GO:0043666~regulation of phosphoprotein phosphatase activity	5	0.192382	0.0740443	ENSG00000197386, ENSG00000184203, ENSG00000105063, ENSG00000165699, ENSG00000110075	2285	14	19308	3.01782	1	1	0.988788
GOTERM_BP_DIRECT	GO:0006516~glycoprotein catabolic process	5	0.192382	0.0740443	ENSG00000116661, ENSG00000163527, ENSG00000110075, ENSG00000198408, ENSG00000109323	2285	14	19308	3.01782	1	1	0.988788
GOTERM_BP_DIRECT	GO:0009743~response to carbohydrate	5	0.192382	0.0740443	ENSG00000116473, ENSG00000131711, ENSG00000065833, ENSG00000181019, ENSG00000127314	2285	14	19308	3.01782	1	1	0.988788
GOTERM_BP_DIRECT	GO:2000785~regulation of autophagosome assembly	5	0.192382	0.0740443	ENSG00000108239, ENSG00000115020, ENSG00000188021, ENSG00000100330, ENSG00000032742	2285	14	19308	3.01782	1	1	0.988788
GOTERM_BP_DIRECT	GO:0001921~positive regulation of receptor recycling	5	0.192382	0.0740443	ENSG00000085832, ENSG00000180900, ENSG00000080815, ENSG00000073969, ENSG00000198825	2285	14	19308	3.01782	1	1	0.988788
GOTERM_BP_DIRECT	GO:0071363~cellular response to growth factor stimulus	12	0.461716	0.0754774	ENSG00000204217, ENSG00000131711, ENSG00000168036, ENSG00000115170, ENSG00000121989, ENSG00000183087, ENSG00000141736, ENSG00000085719, ENSG00000121691, ENSG00000247596, ENSG00000145545, ENSG00000108443	2285	58	19308	1.74825	1	1	0.988788
GOTERM_BP_DIRECT	GO:0008543~fibroblast growth factor receptor signaling pathway	12	0.461716	0.0754774	ENSG00000118523, ENSG00000068078, ENSG00000177885, ENSG00000168036, ENSG00000182197, ENSG00000108061, ENSG00000066468, ENSG00000119396, ENSG00000077782, ENSG00000179295, ENSG00000162552, ENSG00000258289	2285	58	19308	1.74825	1	1	0.988788
GOTERM_BP_DIRECT	GO:0060325~face morphogenesis	8	0.307811	0.0763096	ENSG00000167522, ENSG00000157933, ENSG00000103196, ENSG00000115839, ENSG00000164190, ENSG00000179295, ENSG00000163659, ENSG00000070018	2285	32	19308	2.11247	1	1	0.988788
GOTERM_BP_DIRECT	GO:0046856~phosphatidylinositol dephosphorylation	8	0.307811	0.0763096	ENSG00000159082, ENSG00000171100, ENSG00000112367, ENSG00000166912, ENSG00000100330, ENSG00000132376, ENSG00000171862, ENSG00000198825	2285	32	19308	2.11247	1	1	0.988788
GOTERM_BP_DIRECT	GO:0006335~DNA replication-dependent nucleosome assembly	8	0.307811	0.0763096	ENSG00000197837, ENSG00000274750, ENSG00000158406, ENSG00000276180, ENSG00000276966, ENSG00000278828, ENSG00000270882, ENSG00000273542	2285	32	19308	2.11247	1	1	0.988788
GOTERM_BP_DIRECT	GO:0019082~viral protein processing	8	0.307811	0.0763096	ENSG00000115275, ENSG00000131446, ENSG00000141429, ENSG00000082701, ENSG00000088298, ENSG00000177239, ENSG00000152127, ENSG00000112893	2285	32	19308	2.11247	1	1	0.988788
GOTERM_BP_DIRECT	GO:0045931~positive regulation of mitotic cell cycle	8	0.307811	0.0763096	ENSG00000007168, ENSG00000114999, ENSG00000100600, ENSG00000124422, ENSG00000154229, ENSG00000179295, ENSG00000108443, ENSG00000070669	2285	32	19308	2.11247	1	1	0.988788
GOTERM_BP_DIRECT	GO:0048812~neuron projection morphogenesis	13	0.500192	0.0772034	ENSG00000154310, ENSG00000136279, ENSG00000266028, ENSG00000187164, ENSG00000085733, ENSG00000170315, ENSG00000165240, ENSG00000003393, ENSG00000149930, ENSG00000141503, ENSG00000135090, ENSG00000146425, ENSG00000079805	2285	65	19308	1.68998	1	1	0.988788
GOTERM_BP_DIRECT	GO:0043407~negative regulation of MAP kinase activity	10	0.384763	0.0778162	ENSG00000166311, ENSG00000113161, ENSG00000068001, ENSG00000051382, ENSG00000196396, ENSG00000120129, ENSG00000132376, ENSG00000084207, ENSG00000137642, ENSG00000108465	2285	45	19308	1.87775	1	1	0.988788
GOTERM_BP_DIRECT	GO:0045747~positive regulation of Notch signaling pathway	10	0.384763	0.0778162	ENSG00000168785, ENSG00000136999, ENSG00000108219, ENSG00000080189, ENSG00000115977, ENSG00000148400, ENSG00000184277, ENSG00000134352, ENSG00000108175, ENSG00000106003	2285	45	19308	1.87775	1	1	0.988788
GOTERM_BP_DIRECT	GO:0042177~negative regulation of protein catabolic process	10	0.384763	0.0778162	ENSG00000196924, ENSG00000113161, ENSG00000005810, ENSG00000135919, ENSG00000141646, ENSG00000068903, ENSG00000010810, ENSG00000181019, ENSG00000107036, ENSG00000108465	2285	45	19308	1.87775	1	1	0.988788
GOTERM_BP_DIRECT	GO:0046716~muscle cell cellular homeostasis	7	0.269334	0.0785717	ENSG00000142168, ENSG00000149925, ENSG00000151929, ENSG00000112658, ENSG00000171298, ENSG00000171100, ENSG00000005893	2285	26	19308	2.27497	1	1	0.988788
GOTERM_BP_DIRECT	GO:1904262~negative regulation of TORC1 signaling	7	0.269334	0.0785717	ENSG00000198198, ENSG00000130766, ENSG00000080546, ENSG00000164603, ENSG00000149212, ENSG00000149311, ENSG00000239521	2285	26	19308	2.27497	1	1	0.988788
GOTERM_BP_DIRECT	GO:0045332~phospholipid translocation	7	0.269334	0.0785717	ENSG00000143515, ENSG00000122490, ENSG00000124406, ENSG00000112697, ENSG00000064687, ENSG00000145246, ENSG00000058063	2285	26	19308	2.27497	1	1	0.988788
GOTERM_BP_DIRECT	GO:0045653~negative regulation of megakaryocyte differentiation	6	0.230858	0.0786382	ENSG00000197837, ENSG00000158406, ENSG00000276180, ENSG00000276966, ENSG00000270882, ENSG00000273542	2285	20	19308	2.53497	1	1	0.988788
GOTERM_BP_DIRECT	GO:0051604~protein maturation	6	0.230858	0.0786382	ENSG00000168785, ENSG00000108219, ENSG00000103266, ENSG00000143553, ENSG00000137642, ENSG00000143641	2285	20	19308	2.53497	1	1	0.988788
GOTERM_BP_DIRECT	GO:0045862~positive regulation of proteolysis	6	0.230858	0.0786382	ENSG00000166167, ENSG00000147162, ENSG00000112378, ENSG00000099992, ENSG00000103266, ENSG00000182149	2285	20	19308	2.53497	1	1	0.988788
GOTERM_BP_DIRECT	GO:1903232~melanosome assembly	6	0.230858	0.0786382	ENSG00000132842, ENSG00000007255, ENSG00000152056, ENSG00000065000, ENSG00000166747, ENSG00000107521	2285	20	19308	2.53497	1	1	0.988788
GOTERM_BP_DIRECT	GO:0006486~protein glycosylation	23	0.884956	0.0788791	ENSG00000178301, ENSG00000198162, ENSG00000131446, ENSG00000149541, ENSG00000116209, ENSG00000141429, ENSG00000116406, ENSG00000151348, ENSG00000170340, ENSG00000111885, ENSG00000080815, ENSG00000177239, ENSG00000112893, ENSG00000119523, ENSG00000164574, ENSG00000121578, ENSG00000136152, ENSG00000182197, ENSG00000012232, ENSG00000086062, ENSG00000109586, ENSG00000143641, ENSG00000162885	2285	136	19308	1.42903	1	1	0.988788
GOTERM_BP_DIRECT	GO:0042493~response to drug	44	1.69296	0.0794534	ENSG00000177000, ENSG00000196586, ENSG00000177606, ENSG00000154767, ENSG00000171862, ENSG00000119048, ENSG00000005884, ENSG00000198727, ENSG00000166311, ENSG00000167720, ENSG00000142168, ENSG00000081760, ENSG00000084754, ENSG00000035862, ENSG00000151726, ENSG00000168036, ENSG00000161202, ENSG00000130707, ENSG00000145730, ENSG00000181019, ENSG00000104067, ENSG00000126581, ENSG00000131711, ENSG0000…	2285	293	19308	1.26893	1	1	0.988788
GOTERM_BP_DIRECT	GO:1902667~regulation of axon guidance	4	0.153905	0.0803611	ENSG00000130449, ENSG00000214655, ENSG00000005810, ENSG00000162415	2285	9	19308	3.75551	1	1	0.988788
GOTERM_BP_DIRECT	GO:0036289~peptidyl-serine autophosphorylation	4	0.153905	0.0803611	ENSG00000115020, ENSG00000158828, ENSG00000075413, ENSG00000149311	2285	9	19308	3.75551	1	1	0.988788
GOTERM_BP_DIRECT	GO:1905719~protein localization to perinuclear region of cytoplasm	4	0.153905	0.0803611	ENSG00000166971, ENSG00000051009, ENSG00000161011, ENSG00000168172	2285	9	19308	3.75551	1	1	0.988788
GOTERM_BP_DIRECT	GO:0071243~cellular response to arsenic-containing substance	4	0.153905	0.0803611	ENSG00000215301, ENSG00000100292, ENSG00000099875, ENSG00000188690	2285	9	19308	3.75551	1	1	0.988788
GOTERM_BP_DIRECT	GO:0006596~polyamine biosynthetic process	4	0.153905	0.0803611	ENSG00000115758, ENSG00000104904, ENSG00000130066, ENSG00000180304	2285	9	19308	3.75551	1	1	0.988788
GOTERM_BP_DIRECT	GO:0031509~telomeric heterochromatin assembly	4	0.153905	0.0803611	ENSG00000108799, ENSG00000163041, ENSG00000068903, ENSG00000132475	2285	9	19308	3.75551	1	1	0.988788
GOTERM_BP_DIRECT	GO:0006013~mannose metabolic process	4	0.153905	0.0803611	ENSG00000104774, ENSG00000013288, ENSG00000140400, ENSG00000112893	2285	9	19308	3.75551	1	1	0.988788
GOTERM_BP_DIRECT	GO:0010501~RNA secondary structure unwinding	4	0.153905	0.0803611	ENSG00000215301, ENSG00000198563, ENSG00000126070, ENSG00000174953	2285	9	19308	3.75551	1	1	0.988788
GOTERM_BP_DIRECT	GO:1900242~regulation of synaptic vesicle endocytosis	4	0.153905	0.0803611	ENSG00000183826, ENSG00000107758, ENSG00000198668, ENSG00000145214	2285	9	19308	3.75551	1	1	0.988788
GOTERM_BP_DIRECT	GO:0097345~mitochondrial outer membrane permeabilization	4	0.153905	0.0803611	ENSG00000196072, ENSG00000104765, ENSG00000215012, ENSG00000140983	2285	9	19308	3.75551	1	1	0.988788
GOTERM_BP_DIRECT	GO:0006012~galactose metabolic process	4	0.153905	0.0803611	ENSG00000213930, ENSG00000117308, ENSG00000086062, ENSG00000102100	2285	9	19308	3.75551	1	1	0.988788
GOTERM_BP_DIRECT	GO:0008625~extrinsic apoptotic signaling pathway via death domain receptors	9	0.346287	0.0827439	ENSG00000196072, ENSG00000215301, ENSG00000081791, ENSG00000151929, ENSG00000134243, ENSG00000145675, ENSG00000102871, ENSG00000165943, ENSG00000104375	2285	39	19308	1.94997	1	1	0.988788
GOTERM_BP_DIRECT	GO:0008643~carbohydrate transport	9	0.346287	0.0827439	ENSG00000157800, ENSG00000136856, ENSG00000173214, ENSG00000138459, ENSG00000133460, ENSG00000162734, ENSG00000161091, ENSG00000102100, ENSG00000117620	2285	39	19308	1.94997	1	1	0.988788
GOTERM_BP_DIRECT	GO:0009636~response to toxic substance	16	0.615621	0.0854882	ENSG00000106546, ENSG00000110721, ENSG00000112658, ENSG00000120915, ENSG00000084207, ENSG00000170345, ENSG00000198727, ENSG00000137274, ENSG00000225830, ENSG00000092108, ENSG00000181019, ENSG00000104154, ENSG00000124762, ENSG00000184602, ENSG00000108443, ENSG00000070669	2285	87	19308	1.554	1	1	0.988788
GOTERM_BP_DIRECT	GO:0070373~negative regulation of ERK1 and ERK2 cascade	16	0.615621	0.0854882	ENSG00000213463, ENSG00000196396, ENSG00000175463, ENSG00000142082, ENSG00000084207, ENSG00000171862, ENSG00000120129, ENSG00000143507, ENSG00000109062, ENSG00000153071, ENSG00000107581, ENSG00000141646, ENSG00000100234, ENSG00000105053, ENSG00000162772, ENSG00000010017	2285	87	19308	1.554	1	1	0.988788
GOTERM_BP_DIRECT	GO:0046513~ceramide biosynthetic process	8	0.307811	0.0874258	ENSG00000143753, ENSG00000166311, ENSG00000165389, ENSG00000104763, ENSG00000172296, ENSG00000066322, ENSG00000100596, ENSG00000198964	2285	33	19308	2.04846	1	1	0.988788
GOTERM_BP_DIRECT	GO:0006413~translational initiation	11	0.42324	0.0899139	ENSG00000149716, ENSG00000215301, ENSG00000103707, ENSG00000107581, ENSG00000161960, ENSG00000110321, ENSG00000204574, ENSG00000075151, ENSG00000173812, ENSG00000156976, ENSG00000115211	2285	53	19308	1.75375	1	1	0.988788
GOTERM_BP_DIRECT	GO:0009408~response to heat	11	0.42324	0.0899139	ENSG00000142168, ENSG00000001084, ENSG00000204520, ENSG00000162616, ENSG00000076984, ENSG00000164938, ENSG00000086061, ENSG00000120256, ENSG00000198727, ENSG00000115211, ENSG00000108443	2285	53	19308	1.75375	1	1	0.988788
GOTERM_BP_DIRECT	GO:0010608~posttranscriptional regulation of gene expression	7	0.269334	0.0913756	ENSG00000105401, ENSG00000135482, ENSG00000115109, ENSG00000188613, ENSG00000135870, ENSG00000134644, ENSG00000126775	2285	27	19308	2.19071	1	1	0.988788
GOTERM_BP_DIRECT	GO:0006476~protein deacetylation	5	0.192382	0.0918813	ENSG00000187531, ENSG00000142082, ENSG00000068903, ENSG00000171720, ENSG00000089163	2285	15	19308	2.81663	1	1	0.988788
GOTERM_BP_DIRECT	GO:0046512~sphingosine biosynthetic process	5	0.192382	0.0918813	ENSG00000165389, ENSG00000104763, ENSG00000172296, ENSG00000177076, ENSG00000100596	2285	15	19308	2.81663	1	1	0.988788
GOTERM_BP_DIRECT	GO:0044319~wound healing, spreading of cells	5	0.192382	0.0918813	ENSG00000196924, ENSG00000142871, ENSG00000177697, ENSG00000155366, ENSG00000196588	2285	15	19308	2.81663	1	1	0.988788
GOTERM_BP_DIRECT	GO:0043328~protein targeting to vacuole involved in ubiquitin-dependent protein catabolic process via the multivesicular body sorting pathway	5	0.192382	0.0918813	ENSG00000160948, ENSG00000076201, ENSG00000115145, ENSG00000074319, ENSG00000131475	2285	15	19308	2.81663	1	1	0.988788
GOTERM_BP_DIRECT	GO:0006636~unsaturated fatty acid biosynthetic process	5	0.192382	0.0918813	ENSG00000143753, ENSG00000118402, ENSG00000242612, ENSG00000066322, ENSG00000221968	2285	15	19308	2.81663	1	1	0.988788
GOTERM_BP_DIRECT	GO:0016242~negative regulation of macroautophagy	5	0.192382	0.0918813	ENSG00000100292, ENSG00000158828, ENSG00000116260, ENSG00000165699, ENSG00000157106	2285	15	19308	2.81663	1	1	0.988788
GOTERM_BP_DIRECT	GO:2000434~regulation of protein neddylation	5	0.192382	0.0918813	ENSG00000166200, ENSG00000111652, ENSG00000150401, ENSG00000198612, ENSG00000043093	2285	15	19308	2.81663	1	1	0.988788
GOTERM_BP_DIRECT	GO:1900034~regulation of cellular response to heat	5	0.192382	0.0918813	ENSG00000110172, ENSG00000082701, ENSG00000149311, ENSG00000162889, ENSG00000132002	2285	15	19308	2.81663	1	1	0.988788
GOTERM_BP_DIRECT	GO:0006006~glucose metabolic process	13	0.500192	0.0926053	ENSG00000049239, ENSG00000106009, ENSG00000173064, ENSG00000159322, ENSG00000171298, ENSG00000111640, ENSG00000168291, ENSG00000132356, ENSG00000112062, ENSG00000185950, ENSG00000160211, ENSG00000169738, ENSG00000165434	2285	67	19308	1.63953	1	1	0.988788
GOTERM_BP_DIRECT	GO:0048286~lung alveolus development	9	0.346287	0.0932296	ENSG00000204217, ENSG00000196182, ENSG00000198162, ENSG00000165240, ENSG00000168256, ENSG00000066468, ENSG00000095209, ENSG00000112893, ENSG00000136720	2285	40	19308	1.90123	1	1	0.988788
GOTERM_BP_DIRECT	GO:0010634~positive regulation of epithelial cell migration	9	0.346287	0.0932296	ENSG00000204217, ENSG00000115109, ENSG00000185950, ENSG00000122694, ENSG00000177606, ENSG00000131375, ENSG00000147459, ENSG00000115310, ENSG00000005884	2285	40	19308	1.90123	1	1	0.988788
GOTERM_BP_DIRECT	GO:0050775~positive regulation of dendrite morphogenesis	6	0.230858	0.0936018	ENSG00000103264, ENSG00000080371, ENSG00000008086, ENSG00000162065, ENSG00000110888, ENSG00000184402	2285	21	19308	2.41425	1	1	0.988788
GOTERM_BP_DIRECT	GO:1902004~positive regulation of beta-amyloid formation	6	0.230858	0.0936018	ENSG00000134318, ENSG00000073921, ENSG00000120885, ENSG00000160179, ENSG00000164305, ENSG00000151229	2285	21	19308	2.41425	1	1	0.988788
GOTERM_BP_DIRECT	GO:1903077~negative regulation of protein localization to plasma membrane	6	0.230858	0.0936018	ENSG00000073921, ENSG00000116209, ENSG00000153071, ENSG00000066027, ENSG00000171552, ENSG00000161203	2285	21	19308	2.41425	1	1	0.988788
GOTERM_BP_DIRECT	GO:0006606~protein import into nucleus	18	0.692574	0.0971417	ENSG00000153487, ENSG00000103197, ENSG00000160789, ENSG00000117408, ENSG00000265972, ENSG00000196911, ENSG00000120709, ENSG00000114030, ENSG00000161011, ENSG00000186432, ENSG00000083312, ENSG00000121671, ENSG00000148400, ENSG00000102898, ENSG00000183255, ENSG00000145675, ENSG00000124762, ENSG00000104375	2285	103	19308	1.47668	1	1	0.988788
GOTERM_BP_DIRECT	GO:0007528~neuromuscular junction development	8	0.307811	0.0994072	ENSG00000204843, ENSG00000141385, ENSG00000110841, ENSG00000003393, ENSG00000188157, ENSG00000141736, ENSG00000172037, ENSG00000198722	2285	34	19308	1.98821	1	1	0.988788
GOTERM_BP_DIRECT	GO:0051085~chaperone mediated protein folding requiring cofactor	8	0.307811	0.0994072	ENSG00000178950, ENSG00000204389, ENSG00000162616, ENSG00000204388, ENSG00000044574, ENSG00000136816, ENSG00000132581, ENSG00000132002	2285	34	19308	1.98821	1	1	0.988788
GOTERM_BP_DIRECT	GO:0070534~protein K63-linked ubiquitination	10	0.38835	0.0805701	ENSG00000147889, ENSG00000108106, ENSG00000082512, ENSG00000056972, ENSG00000169871, ENSG00000186660, ENSG00000056558, ENSG00000069869, ENSG00000127191, ENSG00000077152	2301	45	19308	1.8647	1	1	0.985829
GOTERM_BP_DIRECT	GO:0072332~intrinsic apoptotic signaling pathway by p53 class mediator	7	0.271845	0.0807261	ENSG00000169567, ENSG00000132382, ENSG00000101412, ENSG00000176720, ENSG00000007968, ENSG00000163565, ENSG00000141510	2301	26	19308	2.25915	1	1	0.985829
GOTERM_BP_DIRECT	GO:0048702~embryonic neurocranium morphogenesis	4	0.15534	0.0817397	ENSG00000100714, ENSG00000184634, ENSG00000070614, ENSG00000120254	2301	9	19308	3.72939	1	1	0.985829
GOTERM_BP_DIRECT	GO:0051248~negative regulation of protein metabolic process	4	0.15534	0.0817397	ENSG00000136160, ENSG00000109320, ENSG00000103126, ENSG00000130164	2301	9	19308	3.72939	1	1	0.985829
GOTERM_BP_DIRECT	GO:0090650~cellular response to oxygen-glucose deprivation	4	0.15534	0.0817397	ENSG00000128272, ENSG00000105835, ENSG00000167535, ENSG00000110395	2301	9	19308	3.72939	1	1	0.985829
GOTERM_BP_DIRECT	GO:0051782~negative regulation of cell division	4	0.15534	0.0817397	ENSG00000164066, ENSG00000091651, ENSG00000197299, ENSG00000136997	2301	9	19308	3.72939	1	1	0.985829
GOTERM_BP_DIRECT	GO:1901990~regulation of mitotic cell cycle phase transition	4	0.15534	0.0817397	ENSG00000114670, ENSG00000166851, ENSG00000090447, ENSG00000176208	2301	9	19308	3.72939	1	1	0.985829
GOTERM_BP_DIRECT	GO:0030728~ovulation	4	0.15534	0.0817397	ENSG00000073756, ENSG00000077238, ENSG00000136997, ENSG00000124882	2301	9	19308	3.72939	1	1	0.985829
GOTERM_BP_DIRECT	GO:0071028~nuclear mRNA surveillance	4	0.15534	0.0817397	ENSG00000123737, ENSG00000120699, ENSG00000171824, ENSG00000077348	2301	9	19308	3.72939	1	1	0.985829
GOTERM_BP_DIRECT	GO:0045647~negative regulation of erythrocyte differentiation	4	0.15534	0.0817397	ENSG00000185340, ENSG00000185650, ENSG00000173757, ENSG00000113013	2301	9	19308	3.72939	1	1	0.985829
GOTERM_BP_DIRECT	GO:0035767~endothelial cell chemotaxis	4	0.15534	0.0817397	ENSG00000143545, ENSG00000112715, ENSG00000171680, ENSG00000189403	2301	9	19308	3.72939	1	1	0.985829
GOTERM_BP_DIRECT	GO:0000467~exonucleolytic trimming to generate mature 3'-end of 5.8S rRNA from tricistronic rRNA transcript (SSU-rRNA, 5.8S rRNA, LSU-rRNA)	4	0.15534	0.0817397	ENSG00000123737, ENSG00000120699, ENSG00000171824, ENSG00000130713	2301	9	19308	3.72939	1	1	0.985829
GOTERM_BP_DIRECT	GO:0050847~progesterone receptor signaling pathway	4	0.15534	0.0817397	ENSG00000137693, ENSG00000197122, ENSG00000069869, ENSG00000124496	2301	9	19308	3.72939	1	1	0.985829
GOTERM_BP_DIRECT	GO:0085020~protein K6-linked ubiquitination	4	0.15534	0.0817397	ENSG00000138376, ENSG00000108106, ENSG00000012048, ENSG00000077152	2301	9	19308	3.72939	1	1	0.985829
GOTERM_BP_DIRECT	GO:0070997~neuron death	4	0.15534	0.0817397	ENSG00000105835, ENSG00000097007, ENSG00000166170, ENSG00000110395	2301	9	19308	3.72939	1	1	0.985829
GOTERM_BP_DIRECT	GO:0097400~interleukin-17-mediated signaling pathway	4	0.15534	0.0817397	ENSG00000082512, ENSG00000056972, ENSG00000263528, ENSG00000127191	2301	9	19308	3.72939	1	1	0.985829
GOTERM_BP_DIRECT	GO:0046755~viral budding	4	0.15534	0.0817397	ENSG00000196814, ENSG00000069869, ENSG00000101421, ENSG00000141971	2301	9	19308	3.72939	1	1	0.985829
GOTERM_BP_DIRECT	GO:0060351~cartilage development involved in endochondral bone morphogenesis	4	0.15534	0.0817397	ENSG00000005073, ENSG00000274276, ENSG00000160200, ENSG00000111199	2301	9	19308	3.72939	1	1	0.985829
GOTERM_BP_DIRECT	GO:0007144~female meiosis I	4	0.15534	0.0817397	ENSG00000132016, ENSG00000160207, ENSG00000071539, ENSG00000101224	2301	9	19308	3.72939	1	1	0.985829
GOTERM_BP_DIRECT	GO:0042698~ovulation cycle	4	0.15534	0.0817397	ENSG00000146648, ENSG00000092445, ENSG00000138696, ENSG00000167601	2301	9	19308	3.72939	1	1	0.985829
GOTERM_BP_DIRECT	GO:0031648~protein destabilization	11	0.427184	0.0841682	ENSG00000117597, ENSG00000147889, ENSG00000100219, ENSG00000166851, ENSG00000197122, ENSG00000103811, ENSG00000151876, ENSG00000253729, ENSG00000015133, ENSG00000179262, ENSG00000126368	2301	52	19308	1.77505	1	1	0.985829
GOTERM_BP_DIRECT	GO:0033077~T cell differentiation in thymus	9	0.349515	0.0854376	ENSG00000196839, ENSG00000105810, ENSG00000168685, ENSG00000070495, ENSG00000185650, ENSG00000025770, ENSG00000253729, ENSG00000173757, ENSG00000141510	2301	39	19308	1.93642	1	1	0.985829
GOTERM_BP_DIRECT	GO:0015031~protein transport	63	2.4466	0.0878141	ENSG00000093000, ENSG00000213024, ENSG00000111711, ENSG00000105438, ENSG00000114346, ENSG00000004777, ENSG00000143952, ENSG00000164695, ENSG00000162878, ENSG00000105197, ENSG00000058804, ENSG00000141971, ENSG00000106477, ENSG00000125450, ENSG00000173171, ENSG00000155561, ENSG00000132507, ENSG00000153140, ENSG00000075188, ENSG00000132341, ENSG00000117724, ENSG00000132780, ENSG00000082898, ENSG0000…	2301	439	19308	1.20419	1	1	0.985829
GOTERM_BP_DIRECT	GO:1900182~positive regulation of protein localization to nucleus	8	0.31068	0.0900196	ENSG00000147889, ENSG00000137693, ENSG00000166851, ENSG00000128342, ENSG00000197122, ENSG00000142208, ENSG00000170312, ENSG00000100065	2301	33	19308	2.03421	1	1	0.985829
GOTERM_BP_DIRECT	GO:0006413~translational initiation	11	0.427184	0.0932145	ENSG00000178982, ENSG00000130741, ENSG00000005100, ENSG00000164163, ENSG00000106263, ENSG00000155506, ENSG00000085760, ENSG00000100353, ENSG00000242372, ENSG00000144895, ENSG00000123908	2301	53	19308	1.74156	1	1	0.985829
GOTERM_BP_DIRECT	GO:0050930~induction of positive chemotaxis	5	0.194175	0.0937662	ENSG00000204305, ENSG00000112715, ENSG00000173511, ENSG00000169429, ENSG00000150630	2301	15	19308	2.79704	1	1	0.985829
GOTERM_BP_DIRECT	GO:0002091~negative regulation of receptor internalization	5	0.194175	0.0937662	ENSG00000132535, ENSG00000198720, ENSG00000100599, ENSG00000005448, ENSG00000087053	2301	15	19308	2.79704	1	1	0.985829
GOTERM_BP_DIRECT	GO:0010952~positive regulation of peptidase activity	5	0.194175	0.0937662	ENSG00000188130, ENSG00000105974, ENSG00000077942, ENSG00000103811, ENSG00000115414	2301	15	19308	2.79704	1	1	0.985829
GOTERM_BP_DIRECT	GO:0016446~somatic hypermutation of immunoglobulin genes	5	0.194175	0.0937662	ENSG00000174371, ENSG00000095002, ENSG00000076248, ENSG00000116062, ENSG00000051341	2301	15	19308	2.79704	1	1	0.985829
GOTERM_BP_DIRECT	GO:0033147~negative regulation of intracellular estrogen receptor signaling pathway	5	0.194175	0.0937662	ENSG00000196792, ENSG00000144580, ENSG00000125107, ENSG00000012048, ENSG00000215021	2301	15	19308	2.79704	1	1	0.985829
GOTERM_BP_DIRECT	GO:0006351~transcription, DNA-templated	19	0.737864	0.0941221	ENSG00000076924, ENSG00000183814, ENSG00000105258, ENSG00000138821, ENSG00000066379, ENSG00000104825, ENSG00000116205, ENSG00000170689, ENSG00000205659, ENSG00000128908, ENSG00000137054, ENSG00000180806, ENSG00000101412, ENSG00000130816, ENSG00000178053, ENSG00000145386, ENSG00000126003, ENSG00000123374, ENSG00000102882	2301	109	19308	1.46267	1	1	0.985829
GOTERM_BP_DIRECT	GO:0008340~determination of adult lifespan	6	0.23301	0.0958183	ENSG00000164430, ENSG00000095002, ENSG00000085999, ENSG00000116062, ENSG00000111676, ENSG00000141510	2301	21	19308	2.39747	1	1	0.985829
GOTERM_BP_DIRECT	GO:0032211~negative regulation of telomere maintenance via telomerase	6	0.23301	0.0958183	ENSG00000140451, ENSG00000092199, ENSG00000171824, ENSG00000197122, ENSG00000172795, ENSG00000135486	2301	21	19308	2.39747	1	1	0.985829
GOTERM_BP_DIRECT	GO:0050731~positive regulation of peptidyl-tyrosine phosphorylation	17	0.660194	0.0959954	ENSG00000112715, ENSG00000128342, ENSG00000026508, ENSG00000153064, ENSG00000162407, ENSG00000197122, ENSG00000097007, ENSG00000173511, ENSG00000136244, ENSG00000261371, ENSG00000157873, ENSG00000154237, ENSG00000116584, ENSG00000101126, ENSG00000090339, ENSG00000141510, ENSG00000143575	2301	95	19308	1.50157	1	1	0.985829
GOTERM_BP_DIRECT	GO:0030177~positive regulation of Wnt signaling pathway	9	0.349515	0.0961975	ENSG00000104332, ENSG00000107104, ENSG00000118503, ENSG00000035499, ENSG00000127616, ENSG00000164362, ENSG00000150764, ENSG00000134046, ENSG00000108379	2301	40	19308	1.88801	1	1	0.985829
GOTERM_BP_DIRECT	GO:0051402~neuron apoptotic process	14	0.543689	0.0969011	ENSG00000132688, ENSG00000064393, ENSG00000065361, ENSG00000092445, ENSG00000111676, ENSG00000176720, ENSG00000122966, ENSG00000159593, ENSG00000100644, ENSG00000101126, ENSG00000015475, ENSG00000164830, ENSG00000167601, ENSG00000141510	2301	74	19308	1.58751	1	1	0.985829

## Sheet: KEGG of down-regulated DEGs
Table S1:GO and KEGG pathway analysis of common down-regulated or up-regulated DEGs between SCC15 and SCC25 after JQ1 addition for 48 h. Biological Processes (BP) of GO analysis for each gene set are shown.
Category	Term	Count	%	PValue	Genes	List Total	Pop Hits	Pop Total	Fold Enrichment	Bonferroni	Benjamini	FDR
KEGG_PATHWAY	hsa04110:Cell cycle	60	2.3301	6.83661e-20	ENSG00000073111, ENSG00000097007, ENSG00000006634, ENSG00000007968, ENSG00000158402, ENSG00000135446, ENSG00000055130, ENSG00000164611, ENSG00000094804, ENSG00000128245, ENSG00000198176, ENSG00000094880, ENSG00000196591, ENSG00000080839, ENSG00000091651, ENSG00000156970, ENSG00000112118, ENSG00000154473, ENSG00000153107, ENSG00000104738, ENSG00000169679, ENSG00000110092, ENSG00000145604, ENSG0000…	1108	126	8164	3.50868	2.28343e-17	2.28343e-17	2.11251e-17
KEGG_PATHWAY	hsa03030:DNA replication	28	1.08738	7.3685e-17	ENSG00000163918, ENSG00000106028, ENSG00000077514, ENSG00000073111, ENSG00000049541, ENSG00000076003, ENSG00000106628, ENSG00000062822, ENSG00000168496, ENSG00000146143, ENSG00000177084, ENSG00000148229, ENSG00000133119, ENSG00000132646, ENSG00000112118, ENSG00000198056, ENSG00000117748, ENSG00000104738, ENSG00000111445, ENSG00000138346, ENSG00000136104, ENSG00000101868, ENSG00000100479, ENSG0000…	1108	36	8164	5.73085	3.70814e-14	1.23054e-14	1.13843e-14
KEGG_PATHWAY	hsa03440:Homologous recombination	24	0.932039	1.56705e-10	ENSG00000106028, ENSG00000077514, ENSG00000139618, ENSG00000197299, ENSG00000196584, ENSG00000117748, ENSG00000106628, ENSG00000020922, ENSG00000154920, ENSG00000172732, ENSG00000062822, ENSG00000163781, ENSG00000138376, ENSG00000085999, ENSG00000182185, ENSG00000136492, ENSG00000127922, ENSG00000083093, ENSG00000126215, ENSG00000105393, ENSG00000185379, ENSG00000101773, ENSG00000012048, ENSG0000…	1108	41	8164	4.31311	5.23395e-08	1.74465e-08	1.61406e-08
KEGG_PATHWAY	hsa03410:Base excision repair	20	0.776699	3.49871e-09	ENSG00000132646, ENSG00000041880, ENSG00000077514, ENSG00000076248, ENSG00000129484, ENSG00000065057, ENSG00000106628, ENSG00000132781, ENSG00000129071, ENSG00000005156, ENSG00000073050, ENSG00000062822, ENSG00000100479, ENSG00000168496, ENSG00000177084, ENSG00000189403, ENSG00000148229, ENSG00000140398, ENSG00000109674, ENSG00000105486	1108	33	8164	4.46559	1.16857e-06	2.92142e-07	2.70275e-07
KEGG_PATHWAY	hsa04218:Cellular senescence	50	1.94175	5.08021e-09	ENSG00000096433, ENSG00000213585, ENSG00000007968, ENSG00000135446, ENSG00000111199, ENSG00000126934, ENSG00000102882, ENSG00000169429, ENSG00000080839, ENSG00000110092, ENSG00000188130, ENSG00000185386, ENSG00000165637, ENSG00000183765, ENSG00000162521, ENSG00000105221, ENSG00000105810, ENSG00000134057, ENSG00000020922, ENSG00000170312, ENSG00000136997, ENSG00000157456, ENSG00000158186, ENSG0000…	1108	156	8164	2.36161	1.69679e-06	3.39358e-07	3.13957e-07
KEGG_PATHWAY	hsa03013:Nucleocytoplasmic transport	38	1.47573	3.07952e-08	ENSG00000065150, ENSG00000093000, ENSG00000105576, ENSG00000108424, ENSG00000132953, ENSG00000213024, ENSG00000133704, ENSG00000111196, ENSG00000163002, ENSG00000182481, ENSG00000102900, ENSG00000100941, ENSG00000100401, ENSG00000101210, ENSG00000120253, ENSG00000058804, ENSG00000108559, ENSG00000125450, ENSG00000155561, ENSG00000113569, ENSG00000075188, ENSG00000132341, ENSG00000169371, ENSG0000…	1108	108	8164	2.59253	1.02855e-05	1.71427e-06	1.58595e-06
KEGG_PATHWAY	hsa05166:Human T-cell leukemia virus 1 infection	60	2.3301	1.36158e-07	ENSG00000099901, ENSG00000213585, ENSG00000121281, ENSG00000128272, ENSG00000196126, ENSG00000198502, ENSG00000007968, ENSG00000135446, ENSG00000157557, ENSG00000134470, ENSG00000126934, ENSG00000138031, ENSG00000160255, ENSG00000100300, ENSG00000102882, ENSG00000164611, ENSG00000094880, ENSG00000156970, ENSG00000154473, ENSG00000132341, ENSG00000153107, ENSG00000120837, ENSG00000082898, ENSG0000…	1108	222	8164	1.99141	4.54756e-05	6.49666e-06	6.01039e-06
KEGG_PATHWAY	hsa03430:Mismatch repair	15	0.582524	1.62663e-07	ENSG00000163918, ENSG00000174371, ENSG00000133119, ENSG00000132646, ENSG00000095002, ENSG00000106028, ENSG00000077514, ENSG00000049541, ENSG00000117748, ENSG00000106628, ENSG00000111445, ENSG00000062822, ENSG00000116062, ENSG00000106399, ENSG00000105486	1108	23	8164	4.80537	5.43279e-05	6.79117e-06	6.28285e-06
KEGG_PATHWAY	hsa01232:Nucleotide metabolism	30	1.16505	1.05044e-06	ENSG00000158825, ENSG00000106348, ENSG00000133805, ENSG00000129187, ENSG00000176890, ENSG00000004455, ENSG00000172113, ENSG00000168393, ENSG00000035687, ENSG00000167325, ENSG00000196839, ENSG00000165704, ENSG00000111906, ENSG00000141698, ENSG00000239672, ENSG00000143179, ENSG00000162433, ENSG00000128951, ENSG00000134326, ENSG00000156136, ENSG00000025708, ENSG00000171793, ENSG00000179958, ENSG0000…	1108	85	8164	2.60055	0.000350785	3.89829e-05	3.6065e-05
KEGG_PATHWAY	hsa04668:TNF signaling pathway	35	1.35922	2.71389e-06	ENSG00000069399, ENSG00000073756, ENSG00000163739, ENSG00000128272, ENSG00000172216, ENSG00000003402, ENSG00000247077, ENSG00000143578, ENSG00000082512, ENSG00000142208, ENSG00000102882, ENSG00000081041, ENSG00000023445, ENSG00000128342, ENSG00000115604, ENSG00000197442, ENSG00000115009, ENSG00000136244, ENSG00000127191, ENSG00000028137, ENSG00000150630, ENSG00000156711, ENSG00000188130, ENSG0000…	1108	112	8164	2.30257	0.000906029	9.06439e-05	8.38592e-05
KEGG_PATHWAY	hsa00240:Pyrimidine metabolism	22	0.854369	1.12549e-05	ENSG00000156136, ENSG00000134326, ENSG00000158825, ENSG00000129187, ENSG00000176890, ENSG00000025708, ENSG00000172113, ENSG00000171793, ENSG00000179958, ENSG00000168393, ENSG00000167325, ENSG00000084774, ENSG00000047230, ENSG00000125458, ENSG00000103202, ENSG00000111906, ENSG00000122643, ENSG00000141698, ENSG00000239672, ENSG00000143179, ENSG00000162368, ENSG00000128951	1108	58	8164	2.79485	0.00375209	0.000341622	0.000316051
KEGG_PATHWAY	hsa03460:Fanconi anemia pathway	21	0.815534	1.22738e-05	ENSG00000181544, ENSG00000221829, ENSG00000131944, ENSG00000139618, ENSG00000012061, ENSG00000197299, ENSG00000162607, ENSG00000117748, ENSG00000175643, ENSG00000158169, ENSG00000154920, ENSG00000077152, ENSG00000172732, ENSG00000115392, ENSG00000187741, ENSG00000136492, ENSG00000140525, ENSG00000083093, ENSG00000012048, ENSG00000144554, ENSG00000106399	1108	54	8164	2.86542	0.0040911	0.000341622	0.000316051
KEGG_PATHWAY	hsa03018:RNA degradation	26	1.00971	2.55401e-05	ENSG00000074800, ENSG00000154640, ENSG00000067057, ENSG00000144381, ENSG00000130713, ENSG00000039123, ENSG00000144580, ENSG00000172795, ENSG00000204392, ENSG00000110063, ENSG00000130332, ENSG00000113013, ENSG00000120699, ENSG00000138035, ENSG00000088038, ENSG00000125107, ENSG00000128534, ENSG00000130520, ENSG00000108515, ENSG00000077348, ENSG00000166938, ENSG00000170860, ENSG00000123737, ENSG0000…	1108	79	8164	2.42499	0.00849421	0.000656183	0.000607068
KEGG_PATHWAY	hsa03040:Spliceosome	39	1.51456	4.51243e-05	ENSG00000076924, ENSG00000089280, ENSG00000092199, ENSG00000147274, ENSG00000077312, ENSG00000135486, ENSG00000189091, ENSG00000171960, ENSG00000137168, ENSG00000204392, ENSG00000111196, ENSG00000240682, ENSG00000130332, ENSG00000060688, ENSG00000139343, ENSG00000143977, ENSG00000112081, ENSG00000167088, ENSG00000125743, ENSG00000183431, ENSG00000188529, ENSG00000128534, ENSG00000182004, ENSG0000…	1108	147	8164	1.95484	0.0149589	0.00107654	0.000995958
KEGG_PATHWAY	hsa05219:Bladder cancer	16	0.621359	0.000175778	ENSG00000112715, ENSG00000197122, ENSG00000068028, ENSG00000025708, ENSG00000007968, ENSG00000136997, ENSG00000135446, ENSG00000110092, ENSG00000147889, ENSG00000146648, ENSG00000126934, ENSG00000213281, ENSG00000101412, ENSG00000169429, ENSG00000102882, ENSG00000141510	1108	41	8164	2.87541	0.0570246	0.003914	0.00362103
KEGG_PATHWAY	hsa04621:NOD-like receptor signaling pathway	43	1.6699	0.000375125	ENSG00000132357, ENSG00000160703, ENSG00000096433, ENSG00000213585, ENSG00000163739, ENSG00000263528, ENSG00000105835, ENSG00000104825, ENSG00000111335, ENSG00000204397, ENSG00000116688, ENSG00000111331, ENSG00000082512, ENSG00000005100, ENSG00000184584, ENSG00000163568, ENSG00000106100, ENSG00000123143, ENSG00000102882, ENSG00000163565, ENSG00000081041, ENSG00000169429, ENSG00000162654, ENSG0000…	1108	184	8164	1.72192	0.117781	0.00783073	0.0072446
KEGG_PATHWAY	hsa04114:Oocyte meiosis	33	1.28155	0.000528267	ENSG00000096433, ENSG00000112029, ENSG00000121281, ENSG00000156509, ENSG00000134057, ENSG00000170312, ENSG00000158402, ENSG00000157456, ENSG00000112640, ENSG00000141552, ENSG00000117399, ENSG00000055130, ENSG00000166851, ENSG00000138031, ENSG00000105173, ENSG00000087586, ENSG00000127564, ENSG00000102882, ENSG00000164611, ENSG00000128245, ENSG00000094880, ENSG00000135476, ENSG00000153107, ENSG0000…	1108	131	8164	1.85612	0.161791	0.0103789	0.00960203
KEGG_PATHWAY	hsa05014:Amyotrophic lateral sclerosis	72	2.79612	0.00076876	ENSG00000093000, ENSG00000160803, ENSG00000096433, ENSG00000213024, ENSG00000213585, ENSG00000128272, ENSG00000158882, ENSG00000135486, ENSG00000136930, ENSG00000115233, ENSG00000109390, ENSG00000147955, ENSG00000168653, ENSG00000163002, ENSG00000112081, ENSG00000145494, ENSG00000015475, ENSG00000058804, ENSG00000126067, ENSG00000125450, ENSG00000183914, ENSG00000130204, ENSG00000196230, ENSG0000…	1108	364	8164	1.45745	0.226527	0.0142648	0.0131971
KEGG_PATHWAY	hsa03420:Nucleotide excision repair	16	0.621359	0.00094437	ENSG00000163918, ENSG00000133119, ENSG00000132646, ENSG00000077514, ENSG00000012061, ENSG00000049541, ENSG00000117748, ENSG00000106628, ENSG00000111445, ENSG00000062822, ENSG00000100479, ENSG00000177084, ENSG00000179262, ENSG00000148229, ENSG00000106399, ENSG00000105486	1108	47	8164	2.50833	0.270626	0.0159195	0.0147279
KEGG_PATHWAY	hsa05222:Small cell lung cancer	25	0.970874	0.000953261	ENSG00000073756, ENSG00000105810, ENSG00000112769, ENSG00000007968, ENSG00000115414, ENSG00000136997, ENSG00000173207, ENSG00000135446, ENSG00000058085, ENSG00000082512, ENSG00000101412, ENSG00000142208, ENSG00000105173, ENSG00000141510, ENSG00000023445, ENSG00000127191, ENSG00000196878, ENSG00000110092, ENSG00000145604, ENSG00000123975, ENSG00000056558, ENSG00000109320, ENSG00000050555, ENSG0000…	1108	92	8164	2.00224	0.272791	0.0159195	0.0147279
KEGG_PATHWAY	hsa04933:AGE-RAGE signaling pathway in diabetic complications	26	1.00971	0.00145963	ENSG00000115414, ENSG00000135446, ENSG00000213281, ENSG00000142208, ENSG00000102882, ENSG00000169429, ENSG00000092969, ENSG00000112715, ENSG00000126561, ENSG00000115008, ENSG00000173511, ENSG00000136244, ENSG00000131196, ENSG00000117525, ENSG00000173757, ENSG00000150630, ENSG00000156711, ENSG00000110092, ENSG00000204305, ENSG00000188130, ENSG00000125538, ENSG00000185386, ENSG00000109320, ENSG0000…	1108	100	8164	1.91574	0.386069	0.0232151	0.0214774
KEGG_PATHWAY	hsa04914:Progesterone-mediated oocyte maturation	26	1.00971	0.0019645	ENSG00000121281, ENSG00000134057, ENSG00000170312, ENSG00000158402, ENSG00000157456, ENSG00000141552, ENSG00000166851, ENSG00000138031, ENSG00000142208, ENSG00000087586, ENSG00000127564, ENSG00000102882, ENSG00000094880, ENSG00000153107, ENSG00000156711, ENSG00000169679, ENSG00000164045, ENSG00000188130, ENSG00000116670, ENSG00000185386, ENSG00000101224, ENSG00000164109, ENSG00000145386, ENSG0000…	1108	102	8164	1.87818	0.481486	0.0298247	0.0275923
KEGG_PATHWAY	hsa05167:Kaposi sarcoma-associated herpesvirus infection	42	1.63107	0.0021617	ENSG00000096433, ENSG00000073756, ENSG00000105810, ENSG00000163739, ENSG00000263528, ENSG00000007968, ENSG00000136997, ENSG00000135446, ENSG00000204516, ENSG00000126934, ENSG00000100644, ENSG00000144848, ENSG00000213281, ENSG00000101412, ENSG00000142208, ENSG00000015475, ENSG00000102882, ENSG00000081041, ENSG00000169429, ENSG00000141510, ENSG00000112715, ENSG00000110852, ENSG00000197122, ENSG0000…	1108	194	8164	1.59518	0.514604	0.0305281	0.028243
KEGG_PATHWAY	hsa05220:Chronic myeloid leukemia	21	0.815534	0.00219363	ENSG00000196591, ENSG00000126561, ENSG00000105810, ENSG00000097007, ENSG00000007968, ENSG00000002330, ENSG00000136997, ENSG00000173757, ENSG00000135446, ENSG00000110395, ENSG00000110092, ENSG00000147889, ENSG00000126934, ENSG00000109320, ENSG00000213281, ENSG00000101412, ENSG00000142208, ENSG00000102882, ENSG00000105221, ENSG00000141510, ENSG00000092969	1108	76	8164	2.03596	0.519764	0.0305281	0.028243
KEGG_PATHWAY	hsa00270:Cysteine and methionine metabolism	16	0.621359	0.00237002	ENSG00000111716, ENSG00000102172, ENSG00000149089, ENSG00000145293, ENSG00000092621, ENSG00000116649, ENSG00000171097, ENSG00000135069, ENSG00000116984, ENSG00000274276, ENSG00000088305, ENSG00000128309, ENSG00000120053, ENSG00000160200, ENSG00000130816, ENSG00000014641	1108	51	8164	2.3116	0.5473	0.0316635	0.0292934
KEGG_PATHWAY	hsa04210:Apoptosis	31	1.20388	0.0042053	ENSG00000096433, ENSG00000041880, ENSG00000129484, ENSG00000128272, ENSG00000103811, ENSG00000135047, ENSG00000002330, ENSG00000003402, ENSG00000126934, ENSG00000213281, ENSG00000142208, ENSG00000089685, ENSG00000015475, ENSG00000102882, ENSG00000141510, ENSG00000023445, ENSG00000197442, ENSG00000127191, ENSG00000113368, ENSG00000136943, ENSG00000163131, ENSG00000176619, ENSG00000167553, ENSG0000…	1108	136	8164	1.67952	0.755253	0.0540219	0.0499783
KEGG_PATHWAY	hsa01523:Antifolate resistance	11	0.427184	0.00462998	ENSG00000138363, ENSG00000173638, ENSG00000125538, ENSG00000159131, ENSG00000176890, ENSG00000109320, ENSG00000182199, ENSG00000136244, ENSG00000137563, ENSG00000136877, ENSG00000176974	1108	30	8164	2.70168	0.787753	0.0553478	0.051205
KEGG_PATHWAY	hsa05169:Epstein-Barr virus infection	42	1.63107	0.00463993	ENSG00000026508, ENSG00000165916, ENSG00000105810, ENSG00000263528, ENSG00000104825, ENSG00000111335, ENSG00000196126, ENSG00000007968, ENSG00000198502, ENSG00000136997, ENSG00000135446, ENSG00000111331, ENSG00000115233, ENSG00000082512, ENSG00000204257, ENSG00000127922, ENSG00000101412, ENSG00000142208, ENSG00000105173, ENSG00000015475, ENSG00000103035, ENSG00000141510, ENSG00000196591, ENSG0000…	1108	202	8164	1.53201	0.788461	0.0553478	0.051205
KEGG_PATHWAY	hsa00970:Aminoacyl-tRNA biosynthesis	18	0.699029	0.00577447	ENSG00000136628, ENSG00000130348, ENSG00000133706, ENSG00000134905, ENSG00000172053, ENSG00000059691, ENSG00000115866, ENSG00000134684, ENSG00000134440, ENSG00000196305, ENSG00000065427, ENSG00000204394, ENSG00000117593, ENSG00000139131, ENSG00000143374, ENSG00000166986, ENSG00000110619, ENSG00000145982	1108	66	8164	2.00952	0.855469	0.066506	0.061528
KEGG_PATHWAY	hsa01230:Biosynthesis of amino acids	19	0.737864	0.00996293	ENSG00000074800, ENSG00000108515, ENSG00000067057, ENSG00000092621, ENSG00000135069, ENSG00000116984, ENSG00000176974, ENSG00000166123, ENSG00000274276, ENSG00000059573, ENSG00000101911, ENSG00000183010, ENSG00000062485, ENSG00000182054, ENSG00000161653, ENSG00000120053, ENSG00000182199, ENSG00000160200, ENSG00000101365	1108	75	8164	1.86662	0.964715	0.110921	0.102618
KEGG_PATHWAY	hsa04370:VEGF signaling pathway	16	0.621359	0.0104413	ENSG00000027869, ENSG00000112715, ENSG00000073756, ENSG00000197122, ENSG00000114738, ENSG00000002330, ENSG00000156711, ENSG00000188130, ENSG00000126934, ENSG00000169750, ENSG00000185386, ENSG00000213281, ENSG00000142208, ENSG00000102882, ENSG00000105221, ENSG00000106211	1108	59	8164	1.99816	0.969975	0.112497	0.104076
KEGG_PATHWAY	hsa05163:Human cytomegalovirus infection	44	1.70874	0.0113021	ENSG00000096433, ENSG00000073756, ENSG00000105810, ENSG00000121281, ENSG00000128272, ENSG00000007968, ENSG00000136997, ENSG00000135446, ENSG00000143578, ENSG00000164430, ENSG00000185591, ENSG00000146648, ENSG00000082512, ENSG00000126934, ENSG00000184584, ENSG00000138031, ENSG00000213281, ENSG00000101412, ENSG00000142208, ENSG00000015475, ENSG00000102882, ENSG00000169429, ENSG00000141510, ENSG0000…	1108	225	8164	1.4409	0.977548	0.117965	0.109136
KEGG_PATHWAY	hsa00230:Purine metabolism	28	1.08738	0.0117438	ENSG00000106348, ENSG00000133805, ENSG00000121281, ENSG00000004455, ENSG00000172113, ENSG00000128050, ENSG00000035687, ENSG00000167325, ENSG00000196839, ENSG00000159131, ENSG00000101911, ENSG00000138031, ENSG00000184588, ENSG00000165704, ENSG00000111906, ENSG00000239672, ENSG00000162433, ENSG00000156136, ENSG00000113448, ENSG00000165609, ENSG00000116337, ENSG00000178921, ENSG00000065989, ENSG0000…	1108	128	8164	1.6118	0.980661	0.118861	0.109964
KEGG_PATHWAY	hsa00670:One carbon pool by folate	8	0.31068	0.0128554	ENSG00000138363, ENSG00000100714, ENSG00000159131, ENSG00000176890, ENSG00000182199, ENSG00000116984, ENSG00000176974, ENSG00000120254	1108	20	8164	2.94729	0.986721	0.126285	0.116833
KEGG_PATHWAY	hsa04068:FoxO signaling pathway	28	1.08738	0.0158209	ENSG00000134057, ENSG00000157456, ENSG00000171105, ENSG00000166851, ENSG00000146648, ENSG00000118515, ENSG00000169047, ENSG00000126934, ENSG00000100889, ENSG00000213281, ENSG00000142208, ENSG00000102882, ENSG00000092969, ENSG00000145632, ENSG00000103942, ENSG00000136244, ENSG00000156711, ENSG00000110092, ENSG00000188130, ENSG00000145604, ENSG00000112096, ENSG00000121858, ENSG00000168685, ENSG0000…	1108	131	8164	1.57489	0.995139	0.144426	0.133616
KEGG_PATHWAY	hsa04115:p53 signaling pathway	18	0.699029	0.016228	ENSG00000075218, ENSG00000105810, ENSG00000115107, ENSG00000134057, ENSG00000170312, ENSG00000157456, ENSG00000135446, ENSG00000110092, ENSG00000147889, ENSG00000184990, ENSG00000164054, ENSG00000105173, ENSG00000149554, ENSG00000146674, ENSG00000015475, ENSG00000183765, ENSG00000123374, ENSG00000141510	1108	73	8164	1.81682	0.995766	0.144426	0.133616
KEGG_PATHWAY	hsa01524:Platinum drug resistance	18	0.699029	0.016228	ENSG00000023445, ENSG00000095002, ENSG00000012061, ENSG00000197442, ENSG00000131747, ENSG00000065621, ENSG00000002330, ENSG00000147889, ENSG00000085871, ENSG00000116062, ENSG00000142208, ENSG00000089685, ENSG00000015475, ENSG00000148834, ENSG00000102882, ENSG00000012048, ENSG00000105221, ENSG00000141510	1108	73	8164	1.81682	0.995766	0.144426	0.133616
KEGG_PATHWAY	hsa05225:Hepatocellular carcinoma	34	1.32039	0.0166761	ENSG00000136518, ENSG00000105810, ENSG00000007968, ENSG00000002330, ENSG00000136997, ENSG00000135446, ENSG00000189079, ENSG00000146648, ENSG00000126934, ENSG00000213281, ENSG00000162337, ENSG00000101412, ENSG00000142208, ENSG00000102882, ENSG00000141510, ENSG00000092969, ENSG00000180340, ENSG00000139613, ENSG00000065621, ENSG00000049618, ENSG00000134245, ENSG00000130024, ENSG00000110092, ENSG0000…	1108	168	8164	1.49119	0.996364	0.144426	0.133616
KEGG_PATHWAY	hsa05161:Hepatitis B	33	1.28155	0.0168641	ENSG00000263528, ENSG00000128272, ENSG00000007968, ENSG00000002330, ENSG00000136997, ENSG00000143578, ENSG00000126934, ENSG00000213281, ENSG00000101412, ENSG00000142208, ENSG00000105173, ENSG00000089685, ENSG00000015475, ENSG00000102882, ENSG00000169429, ENSG00000141510, ENSG00000092969, ENSG00000132646, ENSG00000126561, ENSG00000197122, ENSG00000136244, ENSG00000131196, ENSG00000173757, ENSG0000…	1108	162	8164	1.50094	0.996589	0.144426	0.133616
KEGG_PATHWAY	hsa04012:ErbB signaling pathway	20	0.776699	0.0175968	ENSG00000065361, ENSG00000126561, ENSG00000197122, ENSG00000097007, ENSG00000157168, ENSG00000002330, ENSG00000136997, ENSG00000173757, ENSG00000110395, ENSG00000146648, ENSG00000126934, ENSG00000174808, ENSG00000213281, ENSG00000149269, ENSG00000142208, ENSG00000109321, ENSG00000102882, ENSG00000105221, ENSG00000124882, ENSG00000143322	1108	85	8164	1.7337	0.997341	0.146933	0.135935
KEGG_PATHWAY	hsa01522:Endocrine resistance	22	0.854369	0.0206087	ENSG00000123080, ENSG00000121281, ENSG00000197122, ENSG00000007968, ENSG00000002330, ENSG00000135446, ENSG00000156711, ENSG00000110092, ENSG00000142453, ENSG00000147889, ENSG00000188130, ENSG00000146648, ENSG00000185591, ENSG00000126934, ENSG00000185386, ENSG00000138031, ENSG00000213281, ENSG00000101412, ENSG00000142208, ENSG00000102882, ENSG00000105221, ENSG00000141510	1108	98	8164	1.65409	0.999046	0.167886	0.155319
KEGG_PATHWAY	hsa05164:Influenza A	34	1.32039	0.0213018	ENSG00000160703, ENSG00000213585, ENSG00000105810, ENSG00000263528, ENSG00000104825, ENSG00000111335, ENSG00000196126, ENSG00000198502, ENSG00000135446, ENSG00000111331, ENSG00000204257, ENSG00000126934, ENSG00000182481, ENSG00000142208, ENSG00000015475, ENSG00000102882, ENSG00000169429, ENSG00000160752, ENSG00000105323, ENSG00000115008, ENSG00000136244, ENSG00000082898, ENSG00000204287, ENSG0000…	1108	171	8164	1.46503	0.999247	0.1694	0.156721
KEGG_PATHWAY	hsa01240:Biosynthesis of cofactors	31	1.20388	0.0222353	ENSG00000131203, ENSG00000115919, ENSG00000169919, ENSG00000004455, ENSG00000135069, ENSG00000172113, ENSG00000137124, ENSG00000139428, ENSG00000137563, ENSG00000136877, ENSG00000152620, ENSG00000176974, ENSG00000035687, ENSG00000147813, ENSG00000084774, ENSG00000239672, ENSG00000162433, ENSG00000120254, ENSG00000136628, ENSG00000132423, ENSG00000134326, ENSG00000126088, ENSG00000171793, ENSG0000…	1108	153	8164	1.49291	0.999453	0.17188	0.159015
KEGG_PATHWAY	hsa05323:Rheumatoid arthritis	21	0.815534	0.0226429	ENSG00000112715, ENSG00000161955, ENSG00000163739, ENSG00000115008, ENSG00000135047, ENSG00000115009, ENSG00000136244, ENSG00000196126, ENSG00000204287, ENSG00000198502, ENSG00000125538, ENSG00000204257, ENSG00000163734, ENSG00000160255, ENSG00000271503, ENSG00000108691, ENSG00000227507, ENSG00000081041, ENSG00000090339, ENSG00000169429, ENSG00000092969	1108	93	8164	1.66379	0.999524	0.17188	0.159015
KEGG_PATHWAY	hsa04657:IL-17 signaling pathway	21	0.815534	0.0252263	ENSG00000073756, ENSG00000163739, ENSG00000263528, ENSG00000181085, ENSG00000115009, ENSG00000136244, ENSG00000127191, ENSG00000172216, ENSG00000156711, ENSG00000188130, ENSG00000118503, ENSG00000125538, ENSG00000056972, ENSG00000082512, ENSG00000185386, ENSG00000109320, ENSG00000163734, ENSG00000108691, ENSG00000081041, ENSG00000169429, ENSG00000102882	1108	94	8164	1.64609	0.999803	0.187235	0.17322
KEGG_PATHWAY	hsa04932:Non-alcoholic fatty liver disease	31	1.20388	0.0262151	ENSG00000128272, ENSG00000025434, ENSG00000131143, ENSG00000171105, ENSG00000109390, ENSG00000168653, ENSG00000169047, ENSG00000142208, ENSG00000139180, ENSG00000145494, ENSG00000015475, ENSG00000110717, ENSG00000169429, ENSG00000197442, ENSG00000115008, ENSG00000099795, ENSG00000136244, ENSG00000127191, ENSG00000023228, ENSG00000156711, ENSG00000213619, ENSG00000065518, ENSG00000100219, ENSG0000…	1108	155	8164	1.47365	0.99986	0.19014	0.175908
KEGG_PATHWAY	hsa05140:Leishmaniasis	18	0.699029	0.0267563	ENSG00000073756, ENSG00000115008, ENSG00000104825, ENSG00000196126, ENSG00000204287, ENSG00000198502, ENSG00000159128, ENSG00000156711, ENSG00000188130, ENSG00000125538, ENSG00000204257, ENSG00000185386, ENSG00000109320, ENSG00000160255, ENSG00000184216, ENSG00000102882, ENSG00000101210, ENSG00000092969	1108	77	8164	1.72244	0.999884	0.19014	0.175908
KEGG_PATHWAY	hsa05223:Non-small cell lung cancer	17	0.660194	0.0293419	ENSG00000126561, ENSG00000105810, ENSG00000068028, ENSG00000007968, ENSG00000002330, ENSG00000173757, ENSG00000135446, ENSG00000110092, ENSG00000147889, ENSG00000146648, ENSG00000126934, ENSG00000213281, ENSG00000101412, ENSG00000142208, ENSG00000102882, ENSG00000105221, ENSG00000141510	1108	72	8164	1.73972	0.999952	0.20417	0.188888
KEGG_PATHWAY	hsa05418:Fluid shear stress and atherosclerosis	28	1.08738	0.0323082	ENSG00000105971, ENSG00000105974, ENSG00000135047, ENSG00000138696, ENSG00000111199, ENSG00000116584, ENSG00000142208, ENSG00000141510, ENSG00000112715, ENSG00000114739, ENSG00000197122, ENSG00000197442, ENSG00000115008, ENSG00000065621, ENSG00000261371, ENSG00000156711, ENSG00000188130, ENSG00000125538, ENSG00000085871, ENSG00000169750, ENSG00000185386, ENSG00000109320, ENSG00000108691, ENSG0000…	1108	139	8164	1.48425	0.999983	0.220223	0.203739
KEGG_PATHWAY	hsa05208:Chemical carcinogenesis - reactive oxygen species	41	1.59223	0.03669	ENSG00000213585, ENSG00000097007, ENSG00000172031, ENSG00000002330, ENSG00000131143, ENSG00000109390, ENSG00000168653, ENSG00000146648, ENSG00000126934, ENSG00000159199, ENSG00000100644, ENSG00000213281, ENSG00000142208, ENSG00000139180, ENSG00000145494, ENSG00000110717, ENSG00000102882, ENSG00000112715, ENSG00000197122, ENSG00000115825, ENSG00000197442, ENSG00000065621, ENSG00000099795, ENSG0000…	1108	223	8164	1.3547	0.999996	0.242743	0.224573
KEGG_PATHWAY	hsa04064:NF-kappa B signaling pathway	22	0.854369	0.0376767	ENSG00000023445, ENSG00000073756, ENSG00000159958, ENSG00000172175, ENSG00000163739, ENSG00000111321, ENSG00000127191, ENSG00000003402, ENSG00000118503, ENSG00000125538, ENSG00000082512, ENSG00000056558, ENSG00000141527, ENSG00000109320, ENSG00000163734, ENSG00000254087, ENSG00000227507, ENSG00000184216, ENSG00000081041, ENSG00000090339, ENSG00000169429, ENSG00000100065	1108	104	8164	1.55866	0.999997	0.242743	0.224573
KEGG_PATHWAY	hsa05210:Colorectal cancer	19	0.737864	0.0377923	ENSG00000095002, ENSG00000002330, ENSG00000136997, ENSG00000110092, ENSG00000146648, ENSG00000081059, ENSG00000126934, ENSG00000116062, ENSG00000169750, ENSG00000213281, ENSG00000142208, ENSG00000109321, ENSG00000089685, ENSG00000103126, ENSG00000102882, ENSG00000105221, ENSG00000124882, ENSG00000141510, ENSG00000092969	1108	86	8164	1.62786	0.999997	0.242743	0.224573
KEGG_PATHWAY	hsa03250:Viral life cycle - HIV-1	15	0.582524	0.0398804	ENSG00000244509, ENSG00000128394, ENSG00000239713, ENSG00000130382, ENSG00000132341, ENSG00000082898, ENSG00000176108, ENSG00000118985, ENSG00000204356, ENSG00000124789, ENSG00000188986, ENSG00000101421, ENSG00000101158, ENSG00000164985, ENSG00000108773	1108	63	8164	1.75434	0.999999	0.246668	0.228205
KEGG_PATHWAY	hsa00310:Lysine degradation	15	0.582524	0.0398804	ENSG00000183955, ENSG00000137124, ENSG00000181192, ENSG00000152455, ENSG00000110066, ENSG00000147548, ENSG00000101945, ENSG00000165671, ENSG00000120437, ENSG00000130309, ENSG00000106397, ENSG00000106462, ENSG00000142611, ENSG00000109685, ENSG00000143499	1108	63	8164	1.75434	0.999999	0.246668	0.228205
KEGG_PATHWAY	hsa05145:Toxoplasmosis	23	0.893204	0.0446593	ENSG00000023445, ENSG00000112769, ENSG00000104825, ENSG00000196126, ENSG00000204287, ENSG00000198502, ENSG00000002330, ENSG00000159128, ENSG00000130164, ENSG00000196878, ENSG00000058085, ENSG00000156711, ENSG00000188130, ENSG00000204257, ENSG00000185386, ENSG00000109320, ENSG00000142208, ENSG00000184216, ENSG00000050555, ENSG00000102882, ENSG00000105221, ENSG00000092969, ENSG00000108179	1108	112	8164	1.51312	1	0.270038	0.249825
KEGG_PATHWAY	hsa05212:Pancreatic cancer	17	0.660194	0.0460843	ENSG00000112715, ENSG00000105810, ENSG00000139618, ENSG00000007968, ENSG00000002330, ENSG00000135446, ENSG00000110092, ENSG00000147889, ENSG00000146648, ENSG00000169750, ENSG00000109320, ENSG00000101412, ENSG00000142208, ENSG00000102882, ENSG00000105221, ENSG00000141510, ENSG00000092969	1108	76	8164	1.64816	1	0.270038	0.249825
KEGG_PATHWAY	hsa05133:Pertussis	17	0.660194	0.0460843	ENSG00000149131, ENSG00000115008, ENSG00000136244, ENSG00000159403, ENSG00000137752, ENSG00000156711, ENSG00000166278, ENSG00000188130, ENSG00000125538, ENSG00000185386, ENSG00000109320, ENSG00000160255, ENSG00000184216, ENSG00000106100, ENSG00000169429, ENSG00000102882, ENSG00000182326	1108	76	8164	1.64816	1	0.270038	0.249825
KEGG_PATHWAY	hsa05010:Alzheimer disease	64	2.48544	0.0581529	ENSG00000096433, ENSG00000073756, ENSG00000213585, ENSG00000128272, ENSG00000136930, ENSG00000115233, ENSG00000171105, ENSG00000109390, ENSG00000168653, ENSG00000126934, ENSG00000182240, ENSG00000145494, ENSG00000015475, ENSG00000123384, ENSG00000102882, ENSG00000126067, ENSG00000196230, ENSG00000180340, ENSG00000197442, ENSG00000127191, ENSG00000023228, ENSG00000134245, ENSG00000213619, ENSG0000…	1108	384	8164	1.22804	1	0.330933	0.306163
KEGG_PATHWAY	hsa03008:Ribosome biogenesis in eukaryotes	22	0.854369	0.0584583	ENSG00000101361, ENSG00000105202, ENSG00000011260, ENSG00000107937, ENSG00000132341, ENSG00000082898, ENSG00000005189, ENSG00000115368, ENSG00000242372, ENSG00000132661, ENSG00000134697, ENSG00000172336, ENSG00000141101, ENSG00000055044, ENSG00000145912, ENSG00000113360, ENSG00000141076, ENSG00000126749, ENSG00000070814, ENSG00000130826, ENSG00000163811, ENSG00000109534	1108	109	8164	1.48717	1	0.330933	0.306163
KEGG_PATHWAY	hsa05200:Pathways in cancer	85	3.30097	0.0684676	ENSG00000073756, ENSG00000077238, ENSG00000121281, ENSG00000112769, ENSG00000097007, ENSG00000074047, ENSG00000007968, ENSG00000173207, ENSG00000135446, ENSG00000058085, ENSG00000055130, ENSG00000185591, ENSG00000134470, ENSG00000082512, ENSG00000126934, ENSG00000138031, ENSG00000015475, ENSG00000102882, ENSG00000169429, ENSG00000112715, ENSG00000196591, ENSG00000139618, ENSG00000180340, ENSG0000…	1108	531	8164	1.17947	1	0.381136	0.352608
KEGG_PATHWAY	hsa05017:Spinocerebellar ataxia	27	1.04854	0.0700925	ENSG00000096433, ENSG00000213585, ENSG00000165916, ENSG00000107815, ENSG00000115233, ENSG00000136930, ENSG00000100804, ENSG00000185591, ENSG00000127922, ENSG00000142208, ENSG00000277791, ENSG00000103035, ENSG00000101361, ENSG00000126067, ENSG00000197442, ENSG00000142507, ENSG00000127191, ENSG00000196218, ENSG00000173898, ENSG00000100219, ENSG00000168488, ENSG00000079432, ENSG00000130638, ENSG0000…	1108	143	8164	1.3912	1	0.383785	0.355059
KEGG_PATHWAY	hsa05417:Lipid and atherosclerosis	38	1.47573	0.0722553	ENSG00000143190, ENSG00000144381, ENSG00000163739, ENSG00000263528, ENSG00000128272, ENSG00000197930, ENSG00000002330, ENSG00000213281, ENSG00000142208, ENSG00000015475, ENSG00000102882, ENSG00000081041, ENSG00000169429, ENSG00000141510, ENSG00000197122, ENSG00000197442, ENSG00000136244, ENSG00000127191, ENSG00000131196, ENSG00000130164, ENSG00000137752, ENSG00000156711, ENSG00000204305, ENSG0000…	1108	215	8164	1.30229	1	0.389246	0.360111
KEGG_PATHWAY	hsa04071:Sphingolipid signaling pathway	23	0.893204	0.0780343	ENSG00000090661, ENSG00000197442, ENSG00000167393, ENSG00000127191, ENSG00000267534, ENSG00000112640, ENSG00000156711, ENSG00000188130, ENSG00000168398, ENSG00000126934, ENSG00000143418, ENSG00000035681, ENSG00000169750, ENSG00000185386, ENSG00000180739, ENSG00000109320, ENSG00000213281, ENSG00000142208, ENSG00000078304, ENSG00000015475, ENSG00000102882, ENSG00000105221, ENSG00000141510	1108	119	8164	1.42411	1	0.413706	0.38274
KEGG_PATHWAY	hsa05120:Epithelial cell signaling in Helicobacter pylori infection	15	0.582524	0.0847179	ENSG00000197122, ENSG00000163739, ENSG00000156711, ENSG00000188130, ENSG00000146648, ENSG00000185386, ENSG00000109320, ENSG00000149269, ENSG00000163734, ENSG00000271503, ENSG00000254087, ENSG00000103653, ENSG00000106100, ENSG00000081041, ENSG00000169429	1108	70	8164	1.57891	1	0.43532	0.402736
KEGG_PATHWAY	hsa04917:Prolactin signaling pathway	15	0.582524	0.0847179	ENSG00000126561, ENSG00000197122, ENSG00000173757, ENSG00000170677, ENSG00000156711, ENSG00000110092, ENSG00000188130, ENSG00000126934, ENSG00000120833, ENSG00000185386, ENSG00000109320, ENSG00000213281, ENSG00000142208, ENSG00000102882, ENSG00000105221	1108	70	8164	1.57891	1	0.43532	0.402736
KEGG_PATHWAY	hsa03450:Non-homologous end-joining	5	0.194175	0.087877	ENSG00000079246, ENSG00000168496, ENSG00000253729, ENSG00000020922, ENSG00000152422	1108	13	8164	2.83394	1	0.444711	0.411424
KEGG_PATHWAY	hsa05012:Parkinson disease	45	1.74757	0.0904097	ENSG00000096433, ENSG00000156587, ENSG00000213585, ENSG00000165916, ENSG00000128272, ENSG00000116688, ENSG00000131143, ENSG00000115233, ENSG00000136930, ENSG00000100804, ENSG00000109390, ENSG00000168653, ENSG00000159199, ENSG00000127922, ENSG00000139180, ENSG00000145494, ENSG00000277791, ENSG00000110717, ENSG00000103035, ENSG00000141510, ENSG00000110911, ENSG00000126067, ENSG00000064692, ENSG0000…	1108	266	8164	1.24651	1	0.446165	0.412769
KEGG_PATHWAY	hsa05146:Amoebiasis	20	0.776699	0.0908359	ENSG00000206073, ENSG00000124570, ENSG00000112769, ENSG00000163739, ENSG00000136244, ENSG00000115414, ENSG00000196878, ENSG00000058085, ENSG00000060558, ENSG00000125538, ENSG00000057149, ENSG00000109320, ENSG00000163734, ENSG00000160255, ENSG00000141404, ENSG00000081041, ENSG00000050555, ENSG00000169429, ENSG00000092969, ENSG00000106211	1108	102	8164	1.44475	1	0.446165	0.412769
KEGG_PATHWAY	hsa05321:Inflammatory bowel disease	14	0.543689	0.0942949	ENSG00000077238, ENSG00000115604, ENSG00000115008, ENSG00000136244, ENSG00000196126, ENSG00000131196, ENSG00000204287, ENSG00000198502, ENSG00000159128, ENSG00000125538, ENSG00000204257, ENSG00000109320, ENSG00000092969, ENSG00000166888	1108	65	8164	1.587	1	0.4523	0.418445
KEGG_PATHWAY	hsa04010:MAPK signaling pathway	49	1.90291	0.0947934	ENSG00000130159, ENSG00000071054, ENSG00000128272, ENSG00000153956, ENSG00000171105, ENSG00000126934, ENSG00000067191, ENSG00000130829, ENSG00000089022, ENSG00000102882, ENSG00000112715, ENSG00000114738, ENSG00000197442, ENSG00000111266, ENSG00000127191, ENSG00000138685, ENSG00000150630, ENSG00000188130, ENSG00000125538, ENSG00000169750, ENSG00000185386, ENSG00000101224, ENSG00000184216, ENSG0000…	1108	294	8164	1.22804	1	0.4523	0.418445

## Sheet: KEGG of up-regulated DEGs
Table S1: GO and KEGG pathway analysis of common down-regulated or up-regulated DEGs between SCC15 and SCC25 after JQ1 addition for 48 h. Biological Processes (BP) of GO analysis for each gene set are shown.
Category	Term	Count	%	PValue	Genes	List Total	Pop Hits	Pop Total	Fold Enrichment	Bonferroni	Benjamini	FDR
KEGG_PATHWAY	hsa04142:Lysosome	51	1.96229	9.03636e-13	ENSG00000213983, ENSG00000068001, ENSG00000064601, ENSG00000197217, ENSG00000117410, ENSG00000166311, ENSG00000172869, ENSG00000141012, ENSG00000102805, ENSG00000165102, ENSG00000033627, ENSG00000104774, ENSG00000152056, ENSG00000134243, ENSG00000159720, ENSG00000170266, ENSG00000204386, ENSG00000070371, ENSG00000005893, ENSG00000119655, ENSG00000138760, ENSG00000081014, ENSG00000104093, ENSG0000…	1092	132	8164	2.88853	3.04517e-10	3.04525e-10	2.76513e-10
KEGG_PATHWAY	hsa04140:Autophagy - animal	46	1.76991	7.8947e-09	ENSG00000157954, ENSG00000103197, ENSG00000177169, ENSG00000070540, ENSG00000110046, ENSG00000135341, ENSG00000175224, ENSG00000171862, ENSG00000155876, ENSG00000132356, ENSG00000136874, ENSG00000066739, ENSG00000165861, ENSG00000168397, ENSG00000185950, ENSG00000185896, ENSG00000133818, ENSG00000089289, ENSG00000140941, ENSG00000145675, ENSG00000126775, ENSG00000034713, ENSG00000145016, ENSG0000…	1092	141	8164	2.43904	2.66051e-06	8.95876e-07	8.13466e-07
KEGG_PATHWAY	hsa04144:Endocytosis	68	2.61639	8.66015e-09	ENSG00000108669, ENSG00000024422, ENSG00000132612, ENSG00000066468, ENSG00000004059, ENSG00000075651, ENSG00000131242, ENSG00000136051, ENSG00000084733, ENSG00000008256, ENSG00000168374, ENSG00000153071, ENSG00000090565, ENSG00000124313, ENSG00000108262, ENSG00000101199, ENSG00000124198, ENSG00000074319, ENSG00000075785, ENSG00000134287, ENSG00000072274, ENSG00000070371, ENSG00000198898, ENSG0000…	1092	251	8164	2.02542	2.91847e-06	8.95876e-07	8.13466e-07
KEGG_PATHWAY	hsa04141:Protein processing in endoplasmic reticulum	52	2.00077	1.06335e-08	ENSG00000135924, ENSG00000185825, ENSG00000101152, ENSG00000076984, ENSG00000116406, ENSG00000138674, ENSG00000066427, ENSG00000115275, ENSG00000188021, ENSG00000145495, ENSG00000088298, ENSG00000086232, ENSG00000163527, ENSG00000182446, ENSG00000107643, ENSG00000135018, ENSG00000117643, ENSG00000132388, ENSG00000204389, ENSG00000204388, ENSG00000078967, ENSG00000185624, ENSG00000087074, ENSG0000…	1092	171	8164	2.27346	3.5835e-06	8.95876e-07	8.13466e-07
KEGG_PATHWAY	hsa05132:Salmonella infection	63	2.42401	4.76562e-07	ENSG00000135968, ENSG00000134318, ENSG00000108669, ENSG00000006715, ENSG00000076984, ENSG00000112685, ENSG00000177606, ENSG00000137267, ENSG00000136810, ENSG00000135720, ENSG00000008256, ENSG00000143878, ENSG00000146425, ENSG00000126214, ENSG00000107643, ENSG00000157625, ENSG00000182827, ENSG00000075785, ENSG00000136068, ENSG00000170345, ENSG00000264364, ENSG00000111540, ENSG00000144635, ENSG0000…	1092	249	8164	1.89157	0.000160588	3.21203e-05	2.91656e-05
KEGG_PATHWAY	hsa01100:Metabolic pathways	265	10.1962	1.52201e-06	ENSG00000198585, ENSG00000241973, ENSG00000084207, ENSG00000151498, ENSG00000115275, ENSG00000167720, ENSG00000143753, ENSG00000119523, ENSG00000083123, ENSG00000164574, ENSG00000187210, ENSG00000013375, ENSG00000143198, ENSG00000105223, ENSG00000070610, ENSG00000197121, ENSG00000133835, ENSG00000213930, ENSG00000170340, ENSG00000138604, ENSG00000137992, ENSG00000169239, ENSG00000114054, ENSG0000…	1092	1540	8164	1.28649	0.000512787	8.54863e-05	7.76226e-05
KEGG_PATHWAY	hsa05131:Shigellosis	58	2.23163	1.68812e-05	ENSG00000157954, ENSG00000134318, ENSG00000108669, ENSG00000153113, ENSG00000137942, ENSG00000177606, ENSG00000082701, ENSG00000138758, ENSG00000008256, ENSG00000138193, ENSG00000163041, ENSG00000278828, ENSG00000123104, ENSG00000126775, ENSG00000035403, ENSG00000107643, ENSG00000126581, ENSG00000157625, ENSG00000130402, ENSG00000171552, ENSG00000274750, ENSG00000085733, ENSG00000166167, ENSG0000…	1092	247	8164	1.75554	0.00567287	0.000812711	0.000737951
KEGG_PATHWAY	hsa05203:Viral carcinogenesis	47	1.80839	0.000192981	ENSG00000158406, ENSG00000215301, ENSG00000177885, ENSG00000180596, ENSG00000276180, ENSG00000137947, ENSG00000127481, ENSG00000177606, ENSG00000134352, ENSG00000171720, ENSG00000148180, ENSG00000136238, ENSG00000197903, ENSG00000276966, ENSG00000124635, ENSG00000275713, ENSG00000180900, ENSG00000145675, ENSG00000270882, ENSG00000162434, ENSG00000130402, ENSG00000108953, ENSG00000196890, ENSG0000…	1092	204	8164	1.72246	0.0629708	0.00770577	0.00699693
KEGG_PATHWAY	hsa00511:Other glycan degradation	10	0.384763	0.000205792	ENSG00000104774, ENSG00000070610, ENSG00000169660, ENSG00000170266, ENSG00000013288, ENSG00000179163, ENSG00000204386, ENSG00000140400, ENSG00000162139, ENSG00000109323	1092	18	8164	4.15344	0.0670084	0.00770577	0.00699693
KEGG_PATHWAY	hsa04070:Phosphatidylinositol signaling system	27	1.03886	0.000299982	ENSG00000161714, ENSG00000241973, ENSG00000101290, ENSG00000155252, ENSG00000166908, ENSG00000171100, ENSG00000068745, ENSG00000065357, ENSG00000154229, ENSG00000198668, ENSG00000171862, ENSG00000198825, ENSG00000138193, ENSG00000163624, ENSG00000123104, ENSG00000145675, ENSG00000145214, ENSG00000133731, ENSG00000159082, ENSG00000115020, ENSG00000040933, ENSG00000011405, ENSG00000051382, ENSG0000…	1092	97	8164	2.081	0.0961656	0.00993506	0.00902115
KEGG_PATHWAY	hsa04137:Mitophagy - animal	22	0.846479	0.00032429	ENSG00000183735, ENSG00000126581, ENSG00000107643, ENSG00000177169, ENSG00000104765, ENSG00000158828, ENSG00000075785, ENSG00000177606, ENSG00000171552, ENSG00000135655, ENSG00000170315, ENSG00000164442, ENSG00000118689, ENSG00000139112, ENSG00000171109, ENSG00000188554, ENSG00000161011, ENSG00000106052, ENSG00000133818, ENSG00000140941, ENSG00000140983, ENSG00000034713	1092	72	8164	2.28439	0.103542	0.00993506	0.00902115
KEGG_PATHWAY	hsa04216:Ferroptosis	15	0.577145	0.000559652	ENSG00000100292, ENSG00000197111, ENSG00000111684, ENSG00000072274, ENSG00000266412, ENSG00000130066, ENSG00000167996, ENSG00000167468, ENSG00000151726, ENSG00000001084, ENSG00000168003, ENSG00000100983, ENSG00000123983, ENSG00000140941, ENSG00000087086	1092	41	8164	2.73519	0.171928	0.0157169	0.0142711
KEGG_PATHWAY	hsa05322:Systemic lupus erythematosus	33	1.26972	0.000817847	ENSG00000158406, ENSG00000180596, ENSG00000276180, ENSG00000180573, ENSG00000277075, ENSG00000196787, ENSG00000132475, ENSG00000196747, ENSG00000197903, ENSG00000276966, ENSG00000124635, ENSG00000275713, ENSG00000163041, ENSG00000278828, ENSG00000183598, ENSG00000270882, ENSG00000181218, ENSG00000130402, ENSG00000196890, ENSG00000242574, ENSG00000274290, ENSG00000150337, ENSG00000197837, ENSG0000…	1092	136	8164	1.81408	0.24098	0.0212011	0.0192509
KEGG_PATHWAY	hsa00562:Inositol phosphate metabolism	21	0.808003	0.00107377	ENSG00000161714, ENSG00000107789, ENSG00000105655, ENSG00000241973, ENSG00000155252, ENSG00000166908, ENSG00000111669, ENSG00000112367, ENSG00000171100, ENSG00000132376, ENSG00000171862, ENSG00000133731, ENSG00000198825, ENSG00000159082, ENSG00000115020, ENSG00000040933, ENSG00000011405, ENSG00000051382, ENSG00000138193, ENSG00000186111, ENSG00000100330	1092	73	8164	2.15068	0.303757	0.0258473	0.0234696
KEGG_PATHWAY	hsa05120:Epithelial cell signaling in Helicobacter pylori infection	20	0.769527	0.00159926	ENSG00000071553, ENSG00000107643, ENSG00000113732, ENSG00000177606, ENSG00000159720, ENSG00000137845, ENSG00000065559, ENSG00000136238, ENSG00000114573, ENSG00000117410, ENSG00000112062, ENSG00000147416, ENSG00000006062, ENSG00000164305, ENSG00000100554, ENSG00000108262, ENSG00000179295, ENSG00000033627, ENSG00000128524, ENSG00000104067	1092	70	8164	2.13605	0.416891	0.03593	0.0326249
KEGG_PATHWAY	hsa04120:Ubiquitin mediated proteolysis	33	1.26972	0.00175597	ENSG00000104343, ENSG00000131788, ENSG00000099804, ENSG00000198642, ENSG00000113558, ENSG00000110344, ENSG00000119048, ENSG00000116661, ENSG00000162298, ENSG00000166295, ENSG00000185651, ENSG00000103657, ENSG00000123124, ENSG00000109670, ENSG00000185338, ENSG00000033800, ENSG00000128731, ENSG00000103363, ENSG00000130985, ENSG00000129055, ENSG00000077721, ENSG00000175931, ENSG00000159202, ENSG0000…	1092	142	8164	1.73742	0.446936	0.0369851	0.0335829
KEGG_PATHWAY	hsa04520:Adherens junction	20	0.769527	0.00191611	ENSG00000198561, ENSG00000130402, ENSG00000196396, ENSG00000006607, ENSG00000135341, ENSG00000077782, ENSG00000044115, ENSG00000110400, ENSG00000130396, ENSG00000136238, ENSG00000175866, ENSG00000168036, ENSG00000141736, ENSG00000141646, ENSG00000095637, ENSG00000010810, ENSG00000184009, ENSG00000035403, ENSG00000104067, ENSG00000106299	1092	71	8164	2.10597	0.476045	0.0374543	0.0340089
KEGG_PATHWAY	hsa04613:Neutrophil extracellular trap formation	41	1.57753	0.00200052	ENSG00000158406, ENSG00000180596, ENSG00000276180, ENSG00000180573, ENSG00000277075, ENSG00000154229, ENSG00000196787, ENSG00000135341, ENSG00000171720, ENSG00000132475, ENSG00000136238, ENSG00000196747, ENSG00000112062, ENSG00000197903, ENSG00000151729, ENSG00000276966, ENSG00000124635, ENSG00000275713, ENSG00000163041, ENSG00000278828, ENSG00000109572, ENSG00000183598, ENSG00000145675, ENSG0000…	1092	190	8164	1.61328	0.490768	0.0374543	0.0340089
KEGG_PATHWAY	hsa05100:Bacterial invasion of epithelial cells	21	0.808003	0.00217804	ENSG00000150093, ENSG00000167193, ENSG00000138758, ENSG00000044115, ENSG00000070371, ENSG00000136238, ENSG00000175416, ENSG00000085733, ENSG00000197959, ENSG00000051382, ENSG00000062598, ENSG00000117461, ENSG00000168036, ENSG00000168385, ENSG00000089159, ENSG00000145675, ENSG00000184009, ENSG00000035403, ENSG00000079805, ENSG00000050820, ENSG00000106299	1092	77	8164	2.03896	0.520398	0.0386315	0.0350778
KEGG_PATHWAY	hsa04721:Synaptic vesicle cycle	21	0.808003	0.00256988	ENSG00000220205, ENSG00000113732, ENSG00000105649, ENSG00000159720, ENSG00000198722, ENSG00000070371, ENSG00000006125, ENSG00000136854, ENSG00000114573, ENSG00000175416, ENSG00000117410, ENSG00000197959, ENSG00000147416, ENSG00000183020, ENSG00000100554, ENSG00000033627, ENSG00000128524, ENSG00000073969, ENSG00000079805, ENSG00000166900, ENSG00000161203	1092	78	8164	2.01282	0.579859	0.0432987	0.0393157
KEGG_PATHWAY	hsa05034:Alcoholism	40	1.53905	0.00269814	ENSG00000158406, ENSG00000177885, ENSG00000180596, ENSG00000276180, ENSG00000180573, ENSG00000277075, ENSG00000198668, ENSG00000196787, ENSG00000172354, ENSG00000171720, ENSG00000132475, ENSG00000196747, ENSG00000197903, ENSG00000078061, ENSG00000276966, ENSG00000124635, ENSG00000275713, ENSG00000163041, ENSG00000278828, ENSG00000183598, ENSG00000270882, ENSG00000181218, ENSG00000100485, ENSG0000…	1092	187	8164	1.59919	0.597678	0.0432987	0.0393157
KEGG_PATHWAY	hsa05130:Pathogenic Escherichia coli infection	41	1.57753	0.00395002	ENSG00000134318, ENSG00000108669, ENSG00000176014, ENSG00000273749, ENSG00000196586, ENSG00000180370, ENSG00000177606, ENSG00000135341, ENSG00000137267, ENSG00000136238, ENSG00000136754, ENSG00000139644, ENSG00000175866, ENSG00000176658, ENSG00000112062, ENSG00000254999, ENSG00000196914, ENSG00000170348, ENSG00000008256, ENSG00000100345, ENSG00000184009, ENSG00000104067, ENSG00000145555, ENSG0000…	1092	197	8164	1.55596	0.736524	0.0605071	0.0549412
KEGG_PATHWAY	hsa05231:Choline metabolism in cancer	24	0.923432	0.00434653	ENSG00000103197, ENSG00000107643, ENSG00000177885, ENSG00000070214, ENSG00000067113, ENSG00000110721, ENSG00000065357, ENSG00000075651, ENSG00000154229, ENSG00000177606, ENSG00000170345, ENSG00000136238, ENSG00000197208, ENSG00000051382, ENSG00000117461, ENSG00000186111, ENSG00000129219, ENSG00000161217, ENSG00000145675, ENSG00000165699, ENSG00000100485, ENSG00000145214, ENSG00000140992, ENSG0000…	1092	98	8164	1.8309	0.769608	0.0636861	0.0578278
KEGG_PATHWAY	hsa05110:Vibrio cholerae infection	15	0.577145	0.00468162	ENSG00000071553, ENSG00000064651, ENSG00000113732, ENSG00000154229, ENSG00000159720, ENSG00000058262, ENSG00000114573, ENSG00000117410, ENSG00000147416, ENSG00000100554, ENSG00000033627, ENSG00000128524, ENSG00000142875, ENSG00000184009, ENSG00000104067	1092	50	8164	2.24286	0.794315	0.0644163	0.0584907
KEGG_PATHWAY	hsa04146:Peroxisome	21	0.808003	0.00477865	ENSG00000104883, ENSG00000103150, ENSG00000242612, ENSG00000133835, ENSG00000117528, ENSG00000005469, ENSG00000115204, ENSG00000120915, ENSG00000117305, ENSG00000197448, ENSG00000138413, ENSG00000142168, ENSG00000060971, ENSG00000151726, ENSG00000117450, ENSG00000101986, ENSG00000123983, ENSG00000121691, ENSG00000140876, ENSG00000166821, ENSG00000161533	1092	82	8164	1.91463	0.800963	0.0644163	0.0584907
KEGG_PATHWAY	hsa04722:Neurotrophin signaling pathway	27	1.03886	0.00695917	ENSG00000177885, ENSG00000148660, ENSG00000076984, ENSG00000177606, ENSG00000198668, ENSG00000082701, ENSG00000134313, ENSG00000136238, ENSG00000117676, ENSG00000112062, ENSG00000145675, ENSG00000100485, ENSG00000107643, ENSG00000108953, ENSG00000071242, ENSG00000134243, ENSG00000167193, ENSG00000080815, ENSG00000118689, ENSG00000116473, ENSG00000051382, ENSG00000198909, ENSG00000117461, ENSG0000…	1092	119	8164	1.69628	0.904958	0.0837777	0.0760712
KEGG_PATHWAY	hsa04071:Sphingolipid signaling pathway	27	1.03886	0.00695917	ENSG00000134318, ENSG00000104763, ENSG00000073711, ENSG00000172296, ENSG00000066027, ENSG00000075651, ENSG00000154229, ENSG00000198964, ENSG00000171862, ENSG00000136238, ENSG00000166311, ENSG00000112062, ENSG00000143753, ENSG00000145675, ENSG00000107643, ENSG00000105568, ENSG00000177076, ENSG00000114353, ENSG00000117984, ENSG00000051382, ENSG00000117461, ENSG00000127955, ENSG00000100596, ENSG0000…	1092	119	8164	1.69628	0.904958	0.0837777	0.0760712
KEGG_PATHWAY	hsa04136:Autophagy - other	11	0.42324	0.00696076	ENSG00000157954, ENSG00000126581, ENSG00000066739, ENSG00000139112, ENSG00000101844, ENSG00000070540, ENSG00000168397, ENSG00000110046, ENSG00000175224, ENSG00000089289, ENSG00000034713	1092	32	8164	2.56994	0.905009	0.0837777	0.0760712
KEGG_PATHWAY	hsa05135:Yersinia infection	30	1.15429	0.00721111	ENSG00000134318, ENSG00000076984, ENSG00000177606, ENSG00000082701, ENSG00000135341, ENSG00000065559, ENSG00000136238, ENSG00000117676, ENSG00000175866, ENSG00000112062, ENSG00000196914, ENSG00000102606, ENSG00000005020, ENSG00000145675, ENSG00000184009, ENSG00000050820, ENSG00000072736, ENSG00000183735, ENSG00000107643, ENSG00000150093, ENSG00000071242, ENSG00000167193, ENSG00000170345, ENSG0000…	1092	137	8164	1.63712	0.912747	0.0837981	0.0760896
KEGG_PATHWAY	hsa04670:Leukocyte transendothelial migration	26	1.00038	0.0076556	ENSG00000134318, ENSG00000198561, ENSG00000154229, ENSG00000044115, ENSG00000130396, ENSG00000136238, ENSG00000112062, ENSG00000168036, ENSG00000145675, ENSG00000184009, ENSG00000050820, ENSG00000035403, ENSG00000130402, ENSG00000150093, ENSG00000197822, ENSG00000114353, ENSG00000002586, ENSG00000213937, ENSG00000101608, ENSG00000116473, ENSG00000051382, ENSG00000117461, ENSG00000127955, ENSG0000…	1092	114	8164	1.7051	0.92497	0.0849042	0.077094
KEGG_PATHWAY	hsa04150:mTOR signaling pathway	33	1.26972	0.00799114	ENSG00000103197, ENSG00000177169, ENSG00000177885, ENSG00000154229, ENSG00000082701, ENSG00000171862, ENSG00000155876, ENSG00000117676, ENSG00000132356, ENSG00000147416, ENSG00000266173, ENSG00000145979, ENSG00000161202, ENSG00000101577, ENSG00000103257, ENSG00000162552, ENSG00000145675, ENSG00000070018, ENSG00000100485, ENSG00000108443, ENSG00000155760, ENSG00000130766, ENSG00000071242, ENSG0000…	1092	156	8164	1.5815	0.933051	0.0849042	0.077094
KEGG_PATHWAY	hsa00600:Sphingolipid metabolism	15	0.577145	0.00817944	ENSG00000104763, ENSG00000070610, ENSG00000067113, ENSG00000172296, ENSG00000177076, ENSG00000170266, ENSG00000204386, ENSG00000198964, ENSG00000197746, ENSG00000143753, ENSG00000166311, ENSG00000100422, ENSG00000100596, ENSG00000100299, ENSG00000162139	1092	53	8164	2.1159	0.9372	0.0849042	0.077094
KEGG_PATHWAY	hsa00280:Valine, leucine and isoleucine degradation	14	0.538669	0.00853421	ENSG00000106049, ENSG00000072210, ENSG00000138029, ENSG00000117305, ENSG00000151498, ENSG00000137992, ENSG00000114054, ENSG00000081760, ENSG00000083123, ENSG00000084754, ENSG00000143149, ENSG00000060971, ENSG00000183044, ENSG00000127884	1092	48	8164	2.18056	0.944333	0.0849042	0.077094
KEGG_PATHWAY	hsa00071:Fatty acid degradation	13	0.500192	0.00879532	ENSG00000155016, ENSG00000072210, ENSG00000138029, ENSG00000105607, ENSG00000084754, ENSG00000143149, ENSG00000060971, ENSG00000151726, ENSG00000157184, ENSG00000123983, ENSG00000072778, ENSG00000127884, ENSG00000161533	1092	43	8164	2.26024	0.949061	0.0849042	0.077094
KEGG_PATHWAY	hsa04130:SNARE interactions in vesicular transport	11	0.42324	0.00881795	ENSG00000092531, ENSG00000106636, ENSG00000079950, ENSG00000220205, ENSG00000100568, ENSG00000265808, ENSG00000139190, ENSG00000166900, ENSG00000136874, ENSG00000162236, ENSG00000124333	1092	33	8164	2.49206	0.949452	0.0849042	0.077094
KEGG_PATHWAY	hsa04145:Phagosome	32	1.23124	0.00972255	ENSG00000071553, ENSG00000176014, ENSG00000113732, ENSG00000117758, ENSG00000058262, ENSG00000137267, ENSG00000136238, ENSG00000135720, ENSG00000117410, ENSG00000147416, ENSG00000185896, ENSG00000033627, ENSG00000184009, ENSG00000150093, ENSG00000075785, ENSG00000197102, ENSG00000242574, ENSG00000159720, ENSG00000072274, ENSG00000150337, ENSG00000005893, ENSG00000179218, ENSG00000114573, ENSG0000…	1092	152	8164	1.57393	0.96284	0.0910139	0.0826417
KEGG_PATHWAY	hsa05205:Proteoglycans in cancer	40	1.53905	0.0131657	ENSG00000134318, ENSG00000177885, ENSG00000148660, ENSG00000154229, ENSG00000136238, ENSG00000112062, ENSG00000196914, ENSG00000078061, ENSG00000138193, ENSG00000168036, ENSG00000141736, ENSG00000125503, ENSG00000123104, ENSG00000133818, ENSG00000162552, ENSG00000145675, ENSG00000100485, ENSG00000184009, ENSG00000108443, ENSG00000090020, ENSG00000155760, ENSG00000156299, ENSG00000150093, ENSG0000…	1092	205	8164	1.45877	0.98851	0.11677	0.106028
KEGG_PATHWAY	hsa04910:Insulin signaling pathway	29	1.11581	0.0131669	ENSG00000103197, ENSG00000067177, ENSG00000177885, ENSG00000114302, ENSG00000198668, ENSG00000082701, ENSG00000132356, ENSG00000078061, ENSG00000185950, ENSG00000095637, ENSG00000185338, ENSG00000145675, ENSG00000100485, ENSG00000108443, ENSG00000107643, ENSG00000156873, ENSG00000196396, ENSG00000152270, ENSG00000099875, ENSG00000167193, ENSG00000079277, ENSG00000051382, ENSG00000117461, ENSG0000…	1092	137	8164	1.58255	0.988515	0.11677	0.106028
KEGG_PATHWAY	hsa00020:Citrate cycle (TCA cycle)	10	0.384763	0.0136336	ENSG00000073578, ENSG00000119689, ENSG00000166411, ENSG00000105953, ENSG00000100412, ENSG00000143252, ENSG00000122729, ENSG00000168291, ENSG00000131473, ENSG00000138413	1092	30	8164	2.49206	0.990207	0.117808	0.106971
KEGG_PATHWAY	hsa04510:Focal adhesion	39	1.50058	0.0157089	ENSG00000134318, ENSG00000177885, ENSG00000180370, ENSG00000172037, ENSG00000154229, ENSG00000177606, ENSG00000082701, ENSG00000171862, ENSG00000136238, ENSG00000005884, ENSG00000135862, ENSG00000171914, ENSG00000168036, ENSG00000141736, ENSG00000125503, ENSG00000145675, ENSG00000100485, ENSG00000184009, ENSG00000050820, ENSG00000035403, ENSG00000107643, ENSG00000130402, ENSG00000150093, ENSG0000…	1092	201	8164	1.4506	0.995185	0.132348	0.120173
KEGG_PATHWAY	hsa05211:Renal cell carcinoma	17	0.654098	0.0177119	ENSG00000103363, ENSG00000177885, ENSG00000180370, ENSG00000177606, ENSG00000167193, ENSG00000135766, ENSG00000136238, ENSG00000078061, ENSG00000116473, ENSG00000051382, ENSG00000117461, ENSG00000117394, ENSG00000179295, ENSG00000145675, ENSG00000100485, ENSG00000127314, ENSG00000124762	1092	69	8164	1.84196	0.997576	0.139959	0.127085
KEGG_PATHWAY	hsa05016:Huntington disease	55	2.1162	0.0179711	ENSG00000157954, ENSG00000177169, ENSG00000181222, ENSG00000076984, ENSG00000158486, ENSG00000198786, ENSG00000285437, ENSG00000175224, ENSG00000137267, ENSG00000008018, ENSG00000198938, ENSG00000151729, ENSG00000066739, ENSG00000089902, ENSG00000130706, ENSG00000099817, ENSG00000233276, ENSG00000126775, ENSG00000126214, ENSG00000108344, ENSG00000107643, ENSG00000126581, ENSG00000070371, ENSG0000…	1092	306	8164	1.34376	0.997782	0.139959	0.127085
KEGG_PATHWAY	hsa00514:Other types of O-glycan biosynthesis	13	0.500192	0.0181148	ENSG00000147162, ENSG00000141429, ENSG00000173950, ENSG00000172986, ENSG00000151233, ENSG00000119514, ENSG00000164574, ENSG00000106392, ENSG00000086062, ENSG00000109586, ENSG00000186866, ENSG00000106003, ENSG00000143641	1092	47	8164	2.06788	0.997889	0.139959	0.127085
KEGG_PATHWAY	hsa05213:Endometrial cancer	15	0.577145	0.0182736	ENSG00000177885, ENSG00000099860, ENSG00000082701, ENSG00000044115, ENSG00000171862, ENSG00000118689, ENSG00000078061, ENSG00000051382, ENSG00000117461, ENSG00000168036, ENSG00000141736, ENSG00000145675, ENSG00000100485, ENSG00000124762, ENSG00000140992	1092	58	8164	1.9335	0.998001	0.139959	0.127085
KEGG_PATHWAY	hsa00564:Glycerophospholipid metabolism	22	0.846479	0.0197813	ENSG00000103066, ENSG00000158669, ENSG00000105223, ENSG00000213398, ENSG00000067113, ENSG00000101290, ENSG00000110721, ENSG00000138018, ENSG00000065357, ENSG00000111684, ENSG00000075651, ENSG00000134324, ENSG00000123739, ENSG00000184381, ENSG00000139163, ENSG00000087253, ENSG00000163624, ENSG00000101577, ENSG00000129219, ENSG00000161217, ENSG00000185813, ENSG00000145214	1092	99	8164	1.66138	0.998809	0.14814	0.134513
KEGG_PATHWAY	hsa05022:Pathways of neurodegeneration - multiple diseases	80	3.07811	0.0220368	ENSG00000157954, ENSG00000177169, ENSG00000076984, ENSG00000112367, ENSG00000158486, ENSG00000198786, ENSG00000198668, ENSG00000082701, ENSG00000175224, ENSG00000066427, ENSG00000137267, ENSG00000008018, ENSG00000198938, ENSG00000151729, ENSG00000066739, ENSG00000165861, ENSG00000130706, ENSG00000123104, ENSG00000162552, ENSG00000233276, ENSG00000126775, ENSG00000126214, ENSG00000108344, ENSG0000…	1092	476	8164	1.2565	0.999452	0.161443	0.146593
KEGG_PATHWAY	hsa04530:Tight junction	33	1.26972	0.0246167	ENSG00000134318, ENSG00000151276, ENSG00000109756, ENSG00000076984, ENSG00000073350, ENSG00000177606, ENSG00000159216, ENSG00000130396, ENSG00000136238, ENSG00000132356, ENSG00000141736, ENSG00000100345, ENSG00000164877, ENSG00000180900, ENSG00000184009, ENSG00000104067, ENSG00000107643, ENSG00000130402, ENSG00000105568, ENSG00000156299, ENSG00000150093, ENSG00000092841, ENSG00000197822, ENSG0000…	1092	169	8164	1.45985	0.999775	0.176507	0.160271
KEGG_PATHWAY	hsa05418:Fluid shear stress and atherosclerosis	28	1.07734	0.0274209	ENSG00000076984, ENSG00000177606, ENSG00000198668, ENSG00000135341, ENSG00000084207, ENSG00000065559, ENSG00000136238, ENSG00000136810, ENSG00000132356, ENSG00000204217, ENSG00000112062, ENSG00000168036, ENSG00000115170, ENSG00000121989, ENSG00000143198, ENSG00000130707, ENSG00000145675, ENSG00000181019, ENSG00000184009, ENSG00000107643, ENSG00000100292, ENSG00000170345, ENSG00000051382, ENSG0000…	1092	139	8164	1.506	0.999915	0.182058	0.165311
KEGG_PATHWAY	hsa04010:MAPK signaling pathway	52	2.00077	0.0281721	ENSG00000177885, ENSG00000109756, ENSG00000076984, ENSG00000066468, ENSG00000099860, ENSG00000180370, ENSG00000177606, ENSG00000138834, ENSG00000138032, ENSG00000149930, ENSG00000141736, ENSG00000133818, ENSG00000072736, ENSG00000107643, ENSG00000130522, ENSG00000136068, ENSG00000170345, ENSG00000116473, ENSG00000138166, ENSG00000204389, ENSG00000006062, ENSG00000204388, ENSG00000100614, ENSG0000…	1092	294	8164	1.32232	0.999934	0.182058	0.165311
KEGG_PATHWAY	hsa00513:Various types of N-glycan biosynthesis	11	0.42324	0.0288331	ENSG00000119523, ENSG00000198162, ENSG00000131446, ENSG00000101901, ENSG00000169660, ENSG00000111885, ENSG00000163527, ENSG00000086062, ENSG00000177239, ENSG00000112893, ENSG00000117643	1092	39	8164	2.10867	0.999948	0.182058	0.165311
KEGG_PATHWAY	hsa04919:Thyroid hormone signaling pathway	25	0.961908	0.0288344	ENSG00000124151, ENSG00000103197, ENSG00000161714, ENSG00000204231, ENSG00000154229, ENSG00000082701, ENSG00000136111, ENSG00000171720, ENSG00000174437, ENSG00000138193, ENSG00000168036, ENSG00000117394, ENSG00000148400, ENSG00000162552, ENSG00000145675, ENSG00000184009, ENSG00000090020, ENSG00000172348, ENSG00000069849, ENSG00000051382, ENSG00000117461, ENSG00000163399, ENSG00000108510, ENSG0000…	1092	121	8164	1.54467	0.999948	0.182058	0.165311
KEGG_PATHWAY	hsa04152:AMPK signaling pathway	25	0.961908	0.0288344	ENSG00000103197, ENSG00000104388, ENSG00000177169, ENSG00000073711, ENSG00000103150, ENSG00000066027, ENSG00000135341, ENSG00000132356, ENSG00000170525, ENSG00000084733, ENSG00000266173, ENSG00000185950, ENSG00000145675, ENSG00000108443, ENSG00000105568, ENSG00000119396, ENSG00000116678, ENSG00000113161, ENSG00000118689, ENSG00000051382, ENSG00000117461, ENSG00000181929, ENSG00000165699, ENSG0000…	1092	121	8164	1.54467	0.999948	0.182058	0.165311
KEGG_PATHWAY	hsa01200:Carbon metabolism	24	0.923432	0.0292192	ENSG00000073578, ENSG00000049239, ENSG00000105953, ENSG00000067225, ENSG00000111669, ENSG00000159322, ENSG00000111640, ENSG00000122729, ENSG00000065833, ENSG00000168291, ENSG00000138413, ENSG00000114054, ENSG00000119689, ENSG00000149925, ENSG00000166411, ENSG00000160211, ENSG00000100412, ENSG00000121691, ENSG00000143252, ENSG00000142657, ENSG00000149476, ENSG00000127884, ENSG00000161533, ENSG0000…	1092	115	8164	1.56025	0.999954	0.182058	0.165311
KEGG_PATHWAY	hsa04115:p53 signaling pathway	17	0.654098	0.0292978	ENSG00000103197, ENSG00000130766, ENSG00000113328, ENSG00000112378, ENSG00000115129, ENSG00000080546, ENSG00000099860, ENSG00000171552, ENSG00000172667, ENSG00000171862, ENSG00000120868, ENSG00000170836, ENSG00000164305, ENSG00000149212, ENSG00000149311, ENSG00000048392, ENSG00000124762	1092	73	8164	1.74103	0.999956	0.182058	0.165311
KEGG_PATHWAY	hsa01521:EGFR tyrosine kinase inhibitor resistance	18	0.692574	0.0297128	ENSG00000177885, ENSG00000068078, ENSG00000066468, ENSG00000154229, ENSG00000082701, ENSG00000171552, ENSG00000171862, ENSG00000118689, ENSG00000078061, ENSG00000051382, ENSG00000117461, ENSG00000183087, ENSG00000141736, ENSG00000153094, ENSG00000145675, ENSG00000100485, ENSG00000162434, ENSG00000108443	1092	79	8164	1.70344	0.999962	0.182058	0.165311
KEGG_PATHWAY	hsa00531:Glycosaminoglycan degradation	7	0.269334	0.0325653	ENSG00000181523, ENSG00000141012, ENSG00000165102, ENSG00000068001, ENSG00000241489, ENSG00000170266, ENSG00000010404, ENSG00000135677	1092	19	8164	2.75439	0.999986	0.190289	0.172784
KEGG_PATHWAY	hsa00534:Glycosaminoglycan biosynthesis - heparan sulfate / heparin	8	0.307811	0.0329687	ENSG00000027847, ENSG00000149541, ENSG00000153936, ENSG00000182197, ENSG00000151348, ENSG00000138604, ENSG00000012232, ENSG00000136720	1092	24	8164	2.49206	0.999988	0.190289	0.172784
KEGG_PATHWAY	hsa04810:Regulation of actin cytoskeleton	40	1.53905	0.0329831	ENSG00000134318, ENSG00000182957, ENSG00000273749, ENSG00000166908, ENSG00000066468, ENSG00000180370, ENSG00000148180, ENSG00000136238, ENSG00000005884, ENSG00000175866, ENSG00000254999, ENSG00000196914, ENSG00000078061, ENSG00000102606, ENSG00000100345, ENSG00000108262, ENSG00000125503, ENSG00000133818, ENSG00000145675, ENSG00000100485, ENSG00000184009, ENSG00000050820, ENSG00000035403, ENSG0000…	1092	218	8164	1.37178	0.999988	0.190289	0.172784
KEGG_PATHWAY	hsa05210:Colorectal cancer	19	0.73105	0.0333146	ENSG00000107643, ENSG00000177885, ENSG00000113318, ENSG00000099860, ENSG00000177606, ENSG00000082701, ENSG00000170345, ENSG00000136238, ENSG00000078061, ENSG00000051382, ENSG00000117461, ENSG00000168036, ENSG00000164305, ENSG00000153094, ENSG00000141646, ENSG00000145675, ENSG00000100485, ENSG00000124762, ENSG00000108443	1092	86	8164	1.65172	0.999989	0.190289	0.172784
KEGG_PATHWAY	hsa00310:Lysine degradation	15	0.577145	0.0358134	ENSG00000055609, ENSG00000181555, ENSG00000108799, ENSG00000072210, ENSG00000105607, ENSG00000143919, ENSG00000152952, ENSG00000119689, ENSG00000084754, ENSG00000143149, ENSG00000008311, ENSG00000175309, ENSG00000185420, ENSG00000083444, ENSG00000127884	1092	63	8164	1.78005	0.999995	0.201152	0.182648
KEGG_PATHWAY	hsa05017:Spinocerebellar ataxia	28	1.07734	0.0379286	ENSG00000157954, ENSG00000177169, ENSG00000175166, ENSG00000137947, ENSG00000070540, ENSG00000110046, ENSG00000154229, ENSG00000175224, ENSG00000066427, ENSG00000174437, ENSG00000008018, ENSG00000151729, ENSG00000066739, ENSG00000159352, ENSG00000130706, ENSG00000123104, ENSG00000145675, ENSG00000126775, ENSG00000108344, ENSG00000107643, ENSG00000126581, ENSG00000023287, ENSG00000148572, ENSG0000…	1092	143	8164	1.46387	0.999998	0.20954	0.190265
KEGG_PATHWAY	hsa05230:Central carbon metabolism in cancer	16	0.615621	0.0409079	ENSG00000068078, ENSG00000115419, ENSG00000067225, ENSG00000066468, ENSG00000142082, ENSG00000077782, ENSG00000168291, ENSG00000171862, ENSG00000138413, ENSG00000051382, ENSG00000117461, ENSG00000117394, ENSG00000141736, ENSG00000160211, ENSG00000103257, ENSG00000145675	1092	70	8164	1.70884	0.999999	0.222354	0.2019
KEGG_PATHWAY	hsa05014:Amyotrophic lateral sclerosis	61	2.34706	0.0464658	ENSG00000157954, ENSG00000177169, ENSG00000112367, ENSG00000158486, ENSG00000198786, ENSG00000175224, ENSG00000138279, ENSG00000137267, ENSG00000008018, ENSG00000198938, ENSG00000066739, ENSG00000162231, ENSG00000188021, ENSG00000130706, ENSG00000233276, ENSG00000126775, ENSG00000126214, ENSG00000108344, ENSG00000126581, ENSG00000171552, ENSG00000135018, ENSG00000119013, ENSG00000173805, ENSG0000…	1092	364	8164	1.25288	1	0.244715	0.222204
KEGG_PATHWAY	hsa00410:beta-Alanine metabolism	9	0.346287	0.046474	ENSG00000084754, ENSG00000143149, ENSG00000072210, ENSG00000103150, ENSG00000183044, ENSG00000139631, ENSG00000161533, ENSG00000127884, ENSG00000006534	1092	31	8164	2.17051	1	0.244715	0.222204
KEGG_PATHWAY	hsa00563:Glycosylphosphatidylinositol (GPI)-anchor biosynthesis	8	0.307811	0.0494814	ENSG00000143315, ENSG00000060642, ENSG00000197121, ENSG00000087111, ENSG00000100564, ENSG00000124155, ENSG00000151665, ENSG00000174227	1092	26	8164	2.30037	1	0.256542	0.232943
KEGG_PATHWAY	hsa05170:Human immunodeficiency virus 1 infection	38	1.4621	0.0510967	ENSG00000213983, ENSG00000107758, ENSG00000113558, ENSG00000076984, ENSG00000180370, ENSG00000154229, ENSG00000177606, ENSG00000198668, ENSG00000172354, ENSG00000135341, ENSG00000136238, ENSG00000112062, ENSG00000123104, ENSG00000149311, ENSG00000145675, ENSG00000072736, ENSG00000108443, ENSG00000103363, ENSG00000172380, ENSG00000183735, ENSG00000107643, ENSG00000152056, ENSG00000167193, ENSG0000…	1092	212	8164	1.34007	1	0.260903	0.236903
KEGG_PATHWAY	hsa04012:ErbB signaling pathway	18	0.692574	0.0553174	ENSG00000107643, ENSG00000177885, ENSG00000148660, ENSG00000076984, ENSG00000180370, ENSG00000154229, ENSG00000177606, ENSG00000082701, ENSG00000167193, ENSG00000065559, ENSG00000078061, ENSG00000051382, ENSG00000117461, ENSG00000141736, ENSG00000145675, ENSG00000100485, ENSG00000124762, ENSG00000108443	1092	85	8164	1.58319	1	0.278238	0.252644
KEGG_PATHWAY	hsa04360:Axon guidance	33	1.26972	0.0607283	ENSG00000134318, ENSG00000107731, ENSG00000107758, ENSG00000148660, ENSG00000196220, ENSG00000180370, ENSG00000154229, ENSG00000082701, ENSG00000136238, ENSG00000204217, ENSG00000196914, ENSG00000130827, ENSG00000162552, ENSG00000125266, ENSG00000145675, ENSG00000163785, ENSG00000072736, ENSG00000067141, ENSG00000150093, ENSG00000138623, ENSG00000196576, ENSG00000198910, ENSG00000266028, ENSG0000…	1092	182	8164	1.35557	1	0.300962	0.273278
KEGG_PATHWAY	hsa00510:N-Glycan biosynthesis	12	0.461716	0.0624556	ENSG00000115275, ENSG00000119523, ENSG00000198162, ENSG00000131446, ENSG00000101901, ENSG00000111885, ENSG00000163527, ENSG00000086062, ENSG00000177239, ENSG00000152127, ENSG00000112893, ENSG00000117643	1092	50	8164	1.79429	1	0.304745	0.276712
KEGG_PATHWAY	hsa04213:Longevity regulating pathway - multiple species	14	0.538669	0.0633002	ENSG00000132356, ENSG00000142168, ENSG00000118689, ENSG00000204389, ENSG00000051382, ENSG00000117461, ENSG00000204388, ENSG00000181929, ENSG00000185950, ENSG00000148730, ENSG00000121691, ENSG00000145675, ENSG00000142875, ENSG00000108443	1092	62	8164	1.68817	1	0.304745	0.276712
KEGG_PATHWAY	hsa05208:Chemical carcinogenesis - reactive oxygen species	39	1.50058	0.0656089	ENSG00000073578, ENSG00000106546, ENSG00000177885, ENSG00000076984, ENSG00000075651, ENSG00000198786, ENSG00000177606, ENSG00000111775, ENSG00000065559, ENSG00000171862, ENSG00000136238, ENSG00000198727, ENSG00000112062, ENSG00000198938, ENSG00000142168, ENSG00000151729, ENSG00000078061, ENSG00000225697, ENSG00000160194, ENSG00000143252, ENSG00000143198, ENSG00000145675, ENSG00000100485, ENSG0000…	1092	223	8164	1.3075	1	0.311411	0.282765
KEGG_PATHWAY	hsa00480:Glutathione metabolism	13	0.500192	0.0707021	ENSG00000104687, ENSG00000115758, ENSG00000197448, ENSG00000084207, ENSG00000138413, ENSG00000167468, ENSG00000001084, ENSG00000100983, ENSG00000160211, ENSG00000143198, ENSG00000142657, ENSG00000233276, ENSG00000048392	1092	57	8164	1.7051	1	0.330925	0.300484
KEGG_PATHWAY	hsa04931:Insulin resistance	21	0.808003	0.078827	ENSG00000107643, ENSG00000196396, ENSG00000071242, ENSG00000147162, ENSG00000082701, ENSG00000136111, ENSG00000171862, ENSG00000198408, ENSG00000117676, ENSG00000132356, ENSG00000175727, ENSG00000051382, ENSG00000117461, ENSG00000117394, ENSG00000181929, ENSG00000100994, ENSG00000185950, ENSG00000179295, ENSG00000145675, ENSG00000140992, ENSG00000108443	1092	108	8164	1.4537	1	0.36045	0.327293
KEGG_PATHWAY	hsa04211:Longevity regulating pathway	18	0.692574	0.0791492	ENSG00000103197, ENSG00000177169, ENSG00000130766, ENSG00000023287, ENSG00000080546, ENSG00000175224, ENSG00000132356, ENSG00000118689, ENSG00000051382, ENSG00000117461, ENSG00000181929, ENSG00000185950, ENSG00000121691, ENSG00000149212, ENSG00000145675, ENSG00000165699, ENSG00000142875, ENSG00000108443	1092	89	8164	1.51204	1	0.36045	0.327293
KEGG_PATHWAY	hsa04961:Endocrine and other factor-regulated calcium reabsorption	12	0.461716	0.0883264	ENSG00000197959, ENSG00000070961, ENSG00000183020, ENSG00000154229, ENSG00000070371, ENSG00000163399, ENSG00000006125, ENSG00000142875, ENSG00000079805, ENSG00000175416, ENSG00000069849, ENSG00000161203	1092	53	8164	1.69272	1	0.39688	0.360372
KEGG_PATHWAY	hsa05223:Non-small cell lung cancer	15	0.577145	0.0929021	ENSG00000177885, ENSG00000204231, ENSG00000099860, ENSG00000154229, ENSG00000118689, ENSG00000078061, ENSG00000051382, ENSG00000117461, ENSG00000170759, ENSG00000143924, ENSG00000141736, ENSG00000145675, ENSG00000100485, ENSG00000124762, ENSG00000140992	1092	72	8164	1.55754	1	0.411947	0.374053
KEGG_PATHWAY	hsa04978:Mineral absorption	13	0.500192	0.096755	ENSG00000070961, ENSG00000066230, ENSG00000100292, ENSG00000170385, ENSG00000177556, ENSG00000069849, ENSG00000167996, ENSG00000225697, ENSG00000165240, ENSG00000103415, ENSG00000163399, ENSG00000092439, ENSG00000087086	1092	60	8164	1.61984	1	0.42346	0.384507
