# Supplementary material
Source: Research Square preprint supplement (doi:10.21203/rs.3.rs-9262139/v1)
Supplement: Supplementary file 4 [file 7e7099ce4f0c084aa99c5b26.xlsx]

## Sheet: Data S3
Table S3: Pearson correlation coefficients of three replicates for EPIC assays of proliferative or senescent cells treated with JQ1 or control DMSO for 48 h, respectively.
Prolif_SCC15
	Prolif_SCC15_1	Prolif_SCC15_2	Prolif_SCC15_3
Prolif_SCC15_1		0.998004	0.997989
Prolif_SCC15_2			0.998052
Prolif_SCC15_3
Sen_SCC15
	Sen_SCC15_1	Sen_SCC15_2	Sen_SCC15_3
Sen_SCC15_1		0.997737	0.997992
Sen_SCC15_2			0.997637
Sen_SCC15_3
Prolif_SCC25
	Prolif_SCC25_1	Prolif_SCC25_2	Prolif_SCC25_3
Prolif_SCC25_1		0.998087	0.998033
Prolif_SCC25_2			0.998073
Prolif_SCC25_3
Sen_SCC25
	Sen_SCC25_1	Sen_SCC25_2	Sen_SCC25_3
Sen_SCC25_1		0.998143	0.998017
Sen_SCC25_2			0.998037
Sen_SCC25_3
