# Supplementary material
Source: Research Square preprint supplement (doi:10.21203/rs.3.rs-9262139/v1)
Supplement: Supplementary file 5 [file 80464203185c174e5567ce69.xlsx]

## Sheet: Data S2
Table S2: The binding of transcription factors MYC and MAX with E-box sequence at promoter of autophagy and lysosome related genes in different tumor cell lines.
gene	E-box position distance to TSS	MYC binding						MAX binding
		ENCODE experiment		cell line		tumor type		ENCODE experiment		cell line		tumor type
		num	ID	num	name	num	name	num	ID	num	name	num	name
ATG14	-15	5	ENCSR000DMM, ENCSR000DMQ, ENCSR000DLR, ENCSR000EGJ, ENCSR000EHR	4	MCF-7, HepG2, K562, NB4	4	Breast Cancer, Hepatocellular Carcinoma, Chronic Myeloid Leukemia, Acute Promyelocytic Leukemia	13	ENCSR000BTJ, ENCSR000DYG, ENCSR000BUL, ENCSR000EDS, ENCSR000BTM, ENCSR000BSH, ENCSR000BTY, ENCSR000EZF, ENCSR000ECN, ENCSR000BLP, ENCSR000EFV, ENCSR000EHS, ENCSR000BVD	9	A549, MCF-7, HepG2, HCT116, Ishikawa, HeLa-S3, K562, NB4, SK-N-SH	9	Non-Small Cell Lung Cancer, Breast Cancer, Hepatocellular Carcinoma, Colonic Cancer, Endometrial adenocarcinoma, Cervical Cancer, Chronic Myeloid Leukemia, Acute Promyelocytic Leukemia, NeuroBlastoma
BECN1	-265	1	ENCSR000DMQ	1	MCF-7	1	Breast Cancer	2	ENCSR000BUL, ENCSR000ECN	2	MCF-7, HeLa-S3	2	Breast Cancer, Cervical Cancer
ATG3	-12	6	ENCSR000DYC, ENCSR000DMM, ENCSR000DMQ, ENCSR000EZD, ENCSR000EGJ, ENCSR000EHR	5	A549, MCF-7, HeLa-S3, K562, NB4	5	Non-Small Cell Lung Cancer, Breast Cancer, Cervical Cancer, Chronic Myeloid Leukemia, Acute Promyelocytic Leukemia	14	ENCSR000BTJ, ENCSR000DYG, ENCSR000BUL, ENCSR000EDS, ENCSR000BTM, ENCSR000BSH, ENCSR000BTY, ENCSR000EZF, ENCSR000ECN, ENCSR000BLP, ENCSR000EFV, ENCSR000FAE, ENCSR000EHS, ENCSR000BVD	9	A549, MCF-7, HepG2, HCT116, Ishikawa, HeLa-S3, K562, NB4, SK-N-SH	9	Non-Small Cell Lung Cancer, Breast Cancer, Hepatocellular Carcinoma, Colonic Cancer, Endometrial adenocarcinoma, Cervical Cancer, Chronic Myeloid Leukemia, Acute Promyelocytic Leukemia, NeuroBlastoma
ATG3	11	6	ENCSR000DYC, ENCSR000DMM, ENCSR000DMQ, ENCSR000EZD, ENCSR000EGJ, ENCSR000EHR	5	A549, MCF-7, HeLa-S3, K562, NB4	5	Non-Small Cell Lung Cancer, Breast Cancer, Cervical Cancer, Chronic Myeloid Leukemia, Acute Promyelocytic Leukemia	14	ENCSR000BTJ, ENCSR000DYG, ENCSR000BUL, ENCSR000EDS, ENCSR000BTM, ENCSR000BSH, ENCSR000BTY, ENCSR000EZF, ENCSR000ECN, ENCSR000BLP, ENCSR000EFV, ENCSR000FAE, ENCSR000EHS, ENCSR000BVD	9	A549, MCF-7, HepG2, HCT116, Ishikawa, HeLa-S3, K562, NB4, SK-N-SH	9	Non-Small Cell Lung Cancer, Breast Cancer, Hepatocellular Carcinoma, Colonic Cancer, Endometrial adenocarcinoma, Cervical Cancer, Chronic Myeloid Leukemia, Acute Promyelocytic Leukemia, NeuroBlastoma
ATG5	-67	9	ENCSR000DYC, ENCSR000DMM, ENCSR000DMQ, ENCSR000DMJ, ENCSR000EZD, ENCSR000FAG, ENCSR000DLZ, ENCSR000EGJ, ENCSR000EHR	5	A549, MCF-7, HeLa-S3, K562, NB4	5	Non-Small Cell Lung Cancer, Breast Cancer, Cervical Cancer, Chronic Myeloid Leukemia, Acute Promyelocytic Leukemia	14	ENCSR000BTJ, ENCSR000DYG, ENCSR000BUL, ENCSR000EDS, ENCSR000BTM, ENCSR000BSH, ENCSR000BTY, ENCSR000EZF, ENCSR000ECN, ENCSR000BLP, ENCSR000EFV, ENCSR000FAE, ENCSR000EHS, ENCSR000BVD	9	A549, MCF-7, HepG2, HCT116, Ishikawa, HeLa-S3, K562, NB4, SK-N-SH	9	Non-Small Cell Lung Cancer, Breast Cancer, Hepatocellular Carcinoma, Colonic Cancer, Endometrial adenocarcinoma, Cervical Cancer, Chronic Myeloid Leukemia, Acute Promyelocytic Leukemia, NeuroBlastoma
ATG12	-171	5	ENCSR000DYC, ENCSR000DMQ, ENCSR000EZD, ENCSR000EGJ, ENCSR000EHR	5	A549, MCF-7, HeLa-S3, K562, NB4	5	Non-Small Cell Lung Cancer, Breast Cancer, Cervical Cancer, Chronic Myeloid Leukemia, Acute Promyelocytic Leukemia	9	ENCSR000BTJ, ENCSR000DYG, ENCSR000BUL, ENCSR000EDS, ENCSR000BTM, ENCSR000BTY, ENCSR000ECN, ENCSR000BLP, ENCSR000EHS	7	A549, MCF-7, HepG2, Ishikawa, HeLa-S3, K562, NB4	7	Non-Small Cell Lung Cancer, Breast Cancer, Hepatocellular Carcinoma, Endometrial adenocarcinoma, Cervical Cancer, Chronic Myeloid Leukemia, Acute Promyelocytic Leukemia
SNAP29	-178	5	ENCSR000DMM, ENCSR000DMQ, ENCSR000DLR, ENCSR000EGJ, ENCSR000EHR	4	MCF-7, HepG2, K562, NB4	4	Breast Cancer, Hepatocellular Carcinoma, Chronic Myeloid Leukemia, Acute Promyelocytic Leukemia	12	ENCSR000BTJ, ENCSR000DYG, ENCSR000BUL, ENCSR000EDS, ENCSR000BTM, ENCSR000BSH, ENCSR000BTY, ENCSR000EZF, ENCSR000ECN, ENCSR000EFV, ENCSR000EHS, ENCSR000BVD	9	A549, MCF-7, HepG2, HCT116, Ishikawa, HeLa-S3, K562, NB4, SK-N-SH	9	Non-Small Cell Lung Cancer, Breast Cancer, Hepatocellular Carcinoma, Colonic Cancer, Endometrial adenocarcinoma, Cervical Cancer, Chronic Myeloid Leukemia, Acute Promyelocytic Leukemia, NeuroBlastoma
GABARAP	-614	7	ENCSR000DYC, ENCSR000DMM, ENCSR000DMQ, ENCSR000EZD, ENCSR000DLZ, ENCSR000EGJ, ENCSR000EHR	5	A549, MCF-7, HeLa-S3, K562, NB4	5	Non-Small Cell Lung Cancer, Breast Cancer, Cervical Cancer, Chronic Myeloid Leukemia, Acute Promyelocytic Leukemia	13	ENCSR000BTJ, ENCSR000DYG, ENCSR000BUL, ENCSR000EDS, ENCSR000BTM, ENCSR000BSH, ENCSR000BTY, ENCSR000ECN, ENCSR000BLP, ENCSR000EFV, ENCSR000FAE, ENCSR000EHS, ENCSR000BVD	9	A549, MCF-7, HepG2, HCT116, Ishikawa, HeLa-S3, K562, NB4, SK-N-SH	9	Non-Small Cell Lung Cancer, Breast Cancer, Hepatocellular Carcinoma, Colonic Cancer, Endometrial adenocarcinoma, Cervical Cancer, Chronic Myeloid Leukemia, Acute Promyelocytic Leukemia, NeuroBlastoma
GNS	-59	5	ENCSR000DYC, ENCSR000DMM, ENCSR000DMQ, ENCSR000EGJ, ENCSR000EHR	4	A549, MCF-7, K562, NB4	4	Non-Small Cell Lung Cancer, Breast Cancer, Chronic Myeloid Leukemia, Acute Promyelocytic Leukemia	13	ENCSR000BTJ, ENCSR000DYG, ENCSR000BUL, ENCSR000EDS, ENCSR000BTM, ENCSR000BSH, ENCSR000BTY, ENCSR000ECN, ENCSR000BLP, ENCSR000EFV, ENCSR000FAE, ENCSR000EHS, ENCSR000BVD	9	A549, MCF-7, HepG2, HCT116, Ishikawa, HeLa-S3, K562, NB4, SK-N-SH	9	Non-Small Cell Lung Cancer, Breast Cancer, Hepatocellular Carcinoma, Colonic Cancer, Endometrial adenocarcinoma, Cervical Cancer, Chronic Myeloid Leukemia, Acute Promyelocytic Leukemia, NeuroBlastoma
GNS	-19	5	ENCSR000DYC, ENCSR000DMM, ENCSR000DMQ, ENCSR000EGJ, ENCSR000EHR	4	A549, MCF-7, K562, NB4	4	Non-Small Cell Lung Cancer, Breast Cancer, Chronic Myeloid Leukemia, Acute Promyelocytic Leukemia	13	ENCSR000BTJ, ENCSR000DYG, ENCSR000BUL, ENCSR000EDS, ENCSR000BTM, ENCSR000BSH, ENCSR000BTY, ENCSR000ECN, ENCSR000BLP, ENCSR000EFV, ENCSR000FAE, ENCSR000EHS, ENCSR000BVD	9	A549, MCF-7, HepG2, HCT116, Ishikawa, HeLa-S3, K562, NB4, SK-N-SH	9	Non-Small Cell Lung Cancer, Breast Cancer, Hepatocellular Carcinoma, Colonic Cancer, Endometrial adenocarcinoma, Cervical Cancer, Chronic Myeloid Leukemia, Acute Promyelocytic Leukemia, NeuroBlastoma
SGSH	-66	2	ENCSR000DMM, ENCSR000EGJ	2	MCF-7, K562	2	Breast Cancer, Chronic Myeloid Leukemia	10	ENCSR000BTJ, ENCSR000DYG, ENCSR000BUL, ENCSR000EDS, ENCSR000BTM, ENCSR000BSH, ENCSR000BTY, ENCSR000ECN, ENCSR000BLP, ENCSR000BVD	8	A549, MCF-7, HepG2, HCT116, Ishikawa, HeLa-S3, K562, SK-N-SH	8	Non-Small Cell Lung Cancer, Breast Cancer, Hepatocellular Carcinoma, Colonic Cancer, Endometrial adenocarcinoma, Cervical Cancer, Chronic Myeloid Leukemia, NeuroBlastoma
HEXA	-43	8	ENCSR000DYC, ENCSR000DMM, ENCSR000DMQ, ENCSR000DLR, ENCSR000EZD, ENCSR000DLZ, ENCSR000EGJ, ENCSR000EHR	6	A549, MCF-7, HepG2, HeLa-S3, K562, NB4	6	Non-Small Cell Lung Cancer, Breast Cancer, Hepatocellular Carcinoma, Cervical Cancer, Chronic Myeloid Leukemia, Acute Promyelocytic Leukemia	13	ENCSR000BTJ, ENCSR000DYG, ENCSR000BUL, ENCSR000EDS, ENCSR000BTM, ENCSR000BSH, ENCSR000BTY, ENCSR000EZF, ENCSR000ECN, ENCSR000BLP, ENCSR000EFV, ENCSR000EHS, ENCSR000BVD	9	A549, MCF-7, HepG2, HCT116, Ishikawa, HeLa-S3, K562, NB4, SK-N-SH	9	Non-Small Cell Lung Cancer, Breast Cancer, Hepatocellular Carcinoma, Colonic Cancer, Endometrial adenocarcinoma, Cervical Cancer, Chronic Myeloid Leukemia, Acute Promyelocytic Leukemia, NeuroBlastoma
HEXA	8	8	ENCSR000DYC, ENCSR000DMM, ENCSR000DMQ, ENCSR000DLR, ENCSR000EZD, ENCSR000DLZ, ENCSR000EGJ, ENCSR000EHR	6	A549, MCF-7, HepG2, HeLa-S3, K562, NB4	6	Non-Small Cell Lung Cancer, Breast Cancer, Hepatocellular Carcinoma, Cervical Cancer, Chronic Myeloid Leukemia, Acute Promyelocytic Leukemia	14	ENCSR000BTJ, ENCSR000DYG, ENCSR000BUL, ENCSR000EDS, ENCSR000BTM, ENCSR000BSH, ENCSR000BTY, ENCSR000EZF, ENCSR000ECN, ENCSR000BLP, ENCSR000EFV, ENCSR000FAE, ENCSR000EHS, ENCSR000BVD	9	A549, MCF-7, HepG2, HCT116, Ishikawa, HeLa-S3, K562, NB4, SK-N-SH	9	Non-Small Cell Lung Cancer, Breast Cancer, Hepatocellular Carcinoma, Colonic Cancer, Endometrial adenocarcinoma, Cervical Cancer, Chronic Myeloid Leukemia, Acute Promyelocytic Leukemia, NeuroBlastoma
NAGLU	-42	5	ENCSR000DYC, ENCSR000EZD, ENCSR000DLZ, ENCSR000EGJ, ENCSR000EHR	4	A549, HeLa-S3, K562, NB4	4	Non-Small Cell Lung Cancer, Cervical Cancer, Chronic Myeloid Leukemia, Acute Promyelocytic Leukemia	11	ENCSR000BTJ, ENCSR000DYG, ENCSR000BUL, ENCSR000EDS, ENCSR000BSH, ENCSR000BTY, ENCSR000ECN, ENCSR000BLP, ENCSR000EFV, ENCSR000FAE, ENCSR000EHS	8	A549, MCF-7, HepG2, HCT116, Ishikawa, HeLa-S3, K562, NB4	8	Non-Small Cell Lung Cancer, Breast Cancer, Hepatocellular Carcinoma, Colonic Cancer, Endometrial adenocarcinoma, Cervical Cancer, Chronic Myeloid Leukemia, Acute Promyelocytic Leukemia
CLCN7	-62	8	ENCSR000DYC, ENCSR000DMM, ENCSR000DMQ, ENCSR000EZD, ENCSR000FAG, ENCSR000DLZ, ENCSR000EGJ, ENCSR000EHR	5	A549, MCF-7, HeLa-S3, K562, NB4	5	Non-Small Cell Lung Cancer, Breast Cancer, Cervical Cancer, Chronic Myeloid Leukemia, Acute Promyelocytic Leukemia	14	ENCSR000BTJ, ENCSR000DYG, ENCSR000BUL, ENCSR000EDS, ENCSR000BTM, ENCSR000BSH, ENCSR000BTY, ENCSR000EZF, ENCSR000ECN, ENCSR000BLP, ENCSR000EFV, ENCSR000FAE, ENCSR000EHS, ENCSR000BVD	9	A549, MCF-7, HepG2, HCT116, Ishikawa, HeLa-S3, K562, NB4, SK-N-SH	9	Non-Small Cell Lung Cancer, Breast Cancer, Hepatocellular Carcinoma, Colonic Cancer, Endometrial adenocarcinoma, Cervical Cancer, Chronic Myeloid Leukemia, Acute Promyelocytic Leukemia, NeuroBlastoma
CLCN7	-41	8	ENCSR000DYC, ENCSR000DMM, ENCSR000DMQ, ENCSR000EZD, ENCSR000FAG, ENCSR000DLZ, ENCSR000EGJ, ENCSR000EHR	5	A549, MCF-7, HeLa-S3, K562, NB4	5	Non-Small Cell Lung Cancer, Breast Cancer, Cervical Cancer, Chronic Myeloid Leukemia, Acute Promyelocytic Leukemia	14	ENCSR000BTJ, ENCSR000DYG, ENCSR000BUL, ENCSR000EDS, ENCSR000BTM, ENCSR000BSH, ENCSR000BTY, ENCSR000EZF, ENCSR000ECN, ENCSR000BLP, ENCSR000EFV, ENCSR000FAE, ENCSR000EHS, ENCSR000BVD	9	A549, MCF-7, HepG2, HCT116, Ishikawa, HeLa-S3, K562, NB4, SK-N-SH	9	Non-Small Cell Lung Cancer, Breast Cancer, Hepatocellular Carcinoma, Colonic Cancer, Endometrial adenocarcinoma, Cervical Cancer, Chronic Myeloid Leukemia, Acute Promyelocytic Leukemia, NeuroBlastoma
CLCN7	-21	8	ENCSR000DYC, ENCSR000DMM, ENCSR000DMQ, ENCSR000EZD, ENCSR000FAG, ENCSR000DLZ, ENCSR000EGJ, ENCSR000EHR	5	A549, MCF-7, HeLa-S3, K562, NB4	5	Non-Small Cell Lung Cancer, Breast Cancer, Cervical Cancer, Chronic Myeloid Leukemia, Acute Promyelocytic Leukemia	14	ENCSR000BTJ, ENCSR000DYG, ENCSR000BUL, ENCSR000EDS, ENCSR000BTM, ENCSR000BSH, ENCSR000BTY, ENCSR000EZF, ENCSR000ECN, ENCSR000BLP, ENCSR000EFV, ENCSR000FAE, ENCSR000EHS, ENCSR000BVD	9	A549, MCF-7, HepG2, HCT116, Ishikawa, HeLa-S3, K562, NB4, SK-N-SH	9	Non-Small Cell Lung Cancer, Breast Cancer, Hepatocellular Carcinoma, Colonic Cancer, Endometrial adenocarcinoma, Cervical Cancer, Chronic Myeloid Leukemia, Acute Promyelocytic Leukemia, NeuroBlastoma
CTSB	-49	2	ENCSR000DMM, ENCSR000DMQ	1	MCF-7	1	Breast Cancer	6	ENCSR000EDS, ENCSR000BTM, ENCSR000BSH, ENCSR000ECN, ENCSR000BLP, ENCSR000EFV	4	HepG2, HCT116, HeLa-S3, K562	4	Hepatocellular Carcinoma, Colonic Cancer, Cervical Cancer, Chronic Myeloid Leukemia
LAMP1	-186	5	ENCSR000DYC, ENCSR000DMM, ENCSR000DMJ, ENCSR000EGJ, ENCSR000EHR	4	A549, MCF-7, K562, NB4	4	Non-Small Cell Lung Cancer, Breast Cancer, Chronic Myeloid Leukemia, Acute Promyelocytic Leukemia	13	ENCSR000BTJ, ENCSR000DYG, ENCSR000BUL, ENCSR000EDS, ENCSR000BTM, ENCSR000BTY, ENCSR000EZF, ENCSR000ECN, ENCSR000BLP, ENCSR000EFV, ENCSR000FAE, ENCSR000EHS, ENCSR000BVD	8	A549, MCF-7, HepG2, Ishikawa, HeLa-S3, K562, NB4, SK-N-SH	8	Non-Small Cell Lung Cancer, Breast Cancer, Hepatocellular Carcinoma, Endometrial adenocarcinoma, Cervical Cancer, Chronic Myeloid Leukemia, Acute Promyelocytic Leukemia, NeuroBlastoma
LAMP1	-170	6	ENCSR000DYC, ENCSR000DMM, ENCSR000DMQ, ENCSR000DMJ, ENCSR000EGJ, ENCSR000EHR	4	A549, MCF-7, K562, NB4	4	Non-Small Cell Lung Cancer, Breast Cancer, Chronic Myeloid Leukemia, Acute Promyelocytic Leukemia	13	ENCSR000BTJ, ENCSR000DYG, ENCSR000BUL, ENCSR000EDS, ENCSR000BTM, ENCSR000BTY, ENCSR000EZF, ENCSR000ECN, ENCSR000BLP, ENCSR000EFV, ENCSR000FAE, ENCSR000EHS, ENCSR000BVD	8	A549, MCF-7, HepG2, Ishikawa, HeLa-S3, K562, NB4, SK-N-SH	8	Non-Small Cell Lung Cancer, Breast Cancer, Hepatocellular Carcinoma, Endometrial adenocarcinoma, Cervical Cancer, Chronic Myeloid Leukemia, Acute Promyelocytic Leukemia, NeuroBlastoma
LAMP1	-136	6	ENCSR000DYC, ENCSR000DMM, ENCSR000DMQ, ENCSR000DMJ, ENCSR000EGJ, ENCSR000EHR	4	A549, MCF-7, K562, NB4	4	Non-Small Cell Lung Cancer, Breast Cancer, Chronic Myeloid Leukemia, Acute Promyelocytic Leukemia	13	ENCSR000BTJ, ENCSR000DYG, ENCSR000BUL, ENCSR000EDS, ENCSR000BTM, ENCSR000BTY, ENCSR000EZF, ENCSR000ECN, ENCSR000BLP, ENCSR000EFV, ENCSR000FAE, ENCSR000EHS, ENCSR000BVD	8	A549, MCF-7, HepG2, Ishikawa, HeLa-S3, K562, NB4, SK-N-SH	8	Non-Small Cell Lung Cancer, Breast Cancer, Hepatocellular Carcinoma, Endometrial adenocarcinoma, Cervical Cancer, Chronic Myeloid Leukemia, Acute Promyelocytic Leukemia, NeuroBlastoma
LAMP1	-22	3	ENCSR000DYC, ENCSR000DMJ, ENCSR000EHR	3	A549, MCF-7, NB4	3	Non-Small Cell Lung Cancer, Breast Cancer, Acute Promyelocytic Leukemia	12	ENCSR000BTJ, ENCSR000DYG, ENCSR000BUL, ENCSR000EDS, ENCSR000BTM, ENCSR000BTY, ENCSR000EZF, ENCSR000ECN, ENCSR000BLP, ENCSR000EFV, ENCSR000FAE, ENCSR000BVD	7	A549, MCF-7, HepG2, Ishikawa, HeLa-S3, K562, SK-N-SH	7	Non-Small Cell Lung Cancer, Breast Cancer, Hepatocellular Carcinoma, Endometrial adenocarcinoma, Cervical Cancer, Chronic Myeloid Leukemia, NeuroBlastoma
LAMP1	5	3	ENCSR000DYC, ENCSR000DMJ, ENCSR000EHR	3	A549, MCF-7, NB4	3	Non-Small Cell Lung Cancer, Breast Cancer, Acute Promyelocytic Leukemia	12	ENCSR000BTJ, ENCSR000DYG, ENCSR000BUL, ENCSR000EDS, ENCSR000BTM, ENCSR000BTY, ENCSR000EZF, ENCSR000ECN, ENCSR000BLP, ENCSR000EFV, ENCSR000FAE, ENCSR000BVD	7	A549, MCF-7, HepG2, Ishikawa, HeLa-S3, K562, SK-N-SH	7	Non-Small Cell Lung Cancer, Breast Cancer, Hepatocellular Carcinoma, Endometrial adenocarcinoma, Cervical Cancer, Chronic Myeloid Leukemia, NeuroBlastoma
SMPD1	-264	4	ENCSR000DYC, ENCSR000DMM, ENCSR000DMQ, ENCSR000EGJ	3	A549, MCF-7, K562	3	Non-Small Cell Lung Cancer, Breast Cancer, Chronic Myeloid Leukemia	9	ENCSR000BTJ, ENCSR000EDS, ENCSR000BTM, ENCSR000BSH, ENCSR000ECN, ENCSR000BLP, ENCSR000EFV, ENCSR000EHS, ENCSR000BVD	7	A549, HepG2, HCT116, HeLa-S3, K562, NB4, SK-N-SH	7	Non-Small Cell Lung Cancer, Hepatocellular Carcinoma, Colonic Cancer, Cervical Cancer, Chronic Myeloid Leukemia, Acute Promyelocytic Leukemia, NeuroBlastoma
GAA	-70	5	ENCSR000DYC, ENCSR000DMM, ENCSR000DMQ, ENCSR000EZD, ENCSR000EGJ	4	A549, MCF-7, HeLa-S3, K562	4	Non-Small Cell Lung Cancer, Breast Cancer, Cervical Cancer, Chronic Myeloid Leukemia	11	ENCSR000BTJ, ENCSR000DYG, ENCSR000BUL, ENCSR000EDS, ENCSR000BTM, ENCSR000EZF, ENCSR000ECN, ENCSR000BLP, ENCSR000EFV, ENCSR000FAE, ENCSR000EHS	6	A549, MCF-7, HepG2, HeLa-S3, K562, NB4	6	Non-Small Cell Lung Cancer, Breast Cancer, Hepatocellular Carcinoma, Cervical Cancer, Chronic Myeloid Leukemia, Acute Promyelocytic Leukemia
GAA	-25	5	ENCSR000DYC, ENCSR000DMM, ENCSR000DMQ, ENCSR000EZD, ENCSR000EGJ	4	A549, MCF-7, HeLa-S3, K562	4	Non-Small Cell Lung Cancer, Breast Cancer, Cervical Cancer, Chronic Myeloid Leukemia	11	ENCSR000BTJ, ENCSR000DYG, ENCSR000BUL, ENCSR000EDS, ENCSR000BTM, ENCSR000EZF, ENCSR000ECN, ENCSR000BLP, ENCSR000EFV, ENCSR000FAE, ENCSR000EHS	6	A549, MCF-7, HepG2, HeLa-S3, K562, NB4	6	Non-Small Cell Lung Cancer, Breast Cancer, Hepatocellular Carcinoma, Cervical Cancer, Chronic Myeloid Leukemia, Acute Promyelocytic Leukemia
All of the data is from ENCODE ChIP-seq experiments.
