# Supplementary material
Source: Research Square preprint supplement (doi:10.21203/rs.3.rs-9262139/v1)
Supplement: Supplementary file 6 [file 91d5b51e46224681d6496ee2.xlsx]

## Sheet: antibody
Table S6: List of antibodys, primers and siRNAs used for analysis and gene knockdown.
Antibody	Company	Cat	Application
Lamin B1	Abcam	ab16048	WB、IF
Chk1	Abcam	ab32531	WB
p62	Abcam	ab109012	WB
TGF-β1	Abcam	ab215715	WB
NFkB p105/p50	Abcam	ab32360	WB
Ku70	Abcam	ab92450	WB
GAA	Abcam	ab137068	WB
LAMP2	Abcam	ab199946	WB
Acid sphingomyelinase	Abcam	ab272729	WB
IRF3	Abcam	ab68481	WB
Cyclin E1	Abcam	ab3927	WB
c-Myc	Abcam	ab32072	WB、Co-IP
G9a	Abcam	ab185050	WB、Co-IP
ATG5	Abcam	ab108327	WB
BRD3	Abcam	ab264420	WB
BRCA1	Absea	KC-3270	WB
SMAD4	Abcam	ab230815	WB、IF
Cyclin A2	Cell Signaling Technology	4656	WB
β-tubulin	Cell Signaling Technology	2128	WB
Phospho-Chk1 (Ser317)	Cell Signaling Technology	12302	WB
Chk2	Cell Signaling Technology	6334	WB
Phospho-Chk2 (Thr68)	Cell Signaling Technology	2197	WB
BRD2	Cell Signaling Technology	5848S	WB
BRD4	Cell Signaling Technology	13440	WB、Co-IP
NF-κB p65	Cell Signaling Technology	8242S	WB
LC3B	Cell Signaling Technology	83506s	WB
Cleaved PARP (Asp214)	Cell Signaling Technology	5625	WB
Bcl-2	Cell Signaling Technology	4223	WB
Bax	Cell Signaling Technology	5023	WB
Cleaved Caspase-3 (Asp175)	Cell Signaling Technology	9664	WB
CDK2	Cell Signaling Technology	2546	WB
CDK4	Cell Signaling Technology	12790	WB
CDK6	Cell Signaling Technology	13331	WB
p53	Cell Signaling Technology	2527	WB
Phospho-p53 (Ser15)	Cell Signaling Technology	9286	WB
5-Methylcytosine (5-mC)	Cell Signaling Technology	28692	IF
Ki-67	Cell Signaling Technology	9449	IF
p21 Waf1/Cip1	Cell Signaling Technology	2947	WB、IF
p16 INK4A	Cell Signaling Technology	92803	WB、IF
FoxO1	Cell Signaling Technology	2880	WB、IF
Phospho-NF-κB p65 (Ser536)	Cell Signaling Technology	3033	WB、IF
Anti-Smad3 Monoclonal Antibody	Bioss	33222M	WB
Anti-Smad3 (Ser423 + Ser425) Antibody	Bioss	bs-3425R	WB、IF
Normal Rabbit IgG	Cell Signaling Technology	2729	Co-IP
Phospho-IRF3(Ser396)	Affinity	AF2436	WB
Peroxidase Conjugated Goat anti-Rabbit IgG (h+l)	Fdbio science	FDR007	WB
HRP AffiniPure Goat Anti-Chicken IgY (H+L)	Fdbio science	FD0153	WB
Peroxidase Conjugated Goat anti-Mouse IgG(h+l)	Fdbio science	FD0153	WB
Anti-Mouse IgG (H+L), F(ab')2 Fragment (Alexa Fluor® 594 Conjugate)	Cell Signaling Technology	8890	IF
Anti-Rabbit IgG (H+L), F(ab')2 Fragment (Alexa Fluor® 594 Conjugate)	Cell Signaling Technology	8889	IF
Goat Anti-Rabbit IgG H&L (Alexa Fluor® 488)	Abcam	ab150077	IF
Goat Anti-Mouse IgG H&L (Alexa Fluor® 488)	Abcam	ab150113	IF

## Sheet: primer
Table S6: List of antibodys, primers and siRNAs used for analysis and gene knockdown
Primer Name	Sequence (5' - 3')	Application
β-actin-F	TGGCACCCAGCACAATGAA	mRNA qPCR
β-actin-R	CTAAGTCATAGTCCGCCTAGAAGCA	mRNA qPCR
IL-1α-F	GAGAGCATGGTGGTAGTAGCAA	mRNA qPCR
IL-1α-R	AGGCTTGATGATTTCTTCCTCTGA	mRNA qPCR
IL-1β-F	CGCCAGTGAAATGATGGCTTAT	mRNA qPCR
IL-1β-R	CTGGAAGGAGCACTTCATCTGT	mRNA qPCR
CXCL1-F	CAATCCTGCATCCCCCATAG	mRNA qPCR
CXCL1-R	CAGCCACCAGTGAGCTTCCT	mRNA qPCR
IL-6-F	ACCCCCAGGAGAAGATTCCA	mRNA qPCR
IL-6-R	GATGCCGTCGAGGATGTACC	mRNA qPCR
CXCL8-F	GTTTTTGAAGAGGGCTGAGAATTC	mRNA qPCR
CXCL8-R	CCCTACAACAGACCCACACAATAC	mRNA qPCR
ATG5-F	GGGTTAGGCAGAACACGGAG	ChIP qPCR
ATG5-R	ACCACAAGTCCAGTCACCCT	ChIP qPCR
5'UTR-F	GCCAAGATGGCCGAATAGGA	mRNA qPCR
5'UTR-R	AAATCACCCGTCTTCTGCGT	mRNA qPCR
OFR1-F	ACCTGAAAGTGACGGGGAGA	mRNA qPCR
OFR1-R	CCTGCCTTGCTAGATTGGGG	mRNA qPCR
OFR2-F	CAAACACCGCATATTCTCACTCA	mRNA qPCR
ORF2-R	CTTCCTGTGTCCATGTGATCTCA	mRNA qPCR

## Sheet: siRNA
Table S6: List of antibodys, primers and siRNAs used for analysis and gene knockdown
siRNA Name	Sequence (5' - 3')	Species	Company
siBRD4-1	CUAGAAACUUCCCAAAUGU	human	Tsingke
siBRD4-2	CCUGAUUACUAUAAGAUCA	human	Tsingke
siBRD4-3	GCACAAUCAAGUCUAAACU	human	Tsingke
siBRD4-4	CAAAUUGUUACAUCUACAA	human	Tsingke
siBRD4-5	GCUCAAGACACUAUGGAAA	human	Tsingke
siBRD4-6	GCAACAGCAAUGUGAGCAA	human	Tsingke
siMYC-1	CGACGAGACCUUCAUCAAATT	human	Tsingke
siMYC-2	CGAUGUUGUUUCUGUGGAA	human	Tsingke
siMYC-3	GGAACUAUGACCUCGACUA	human	Tsingke
siBRD2-1	GGCCGAGUUGUGCAUAUAATT	human	Tsingke
siBRD2-2	CCUACAGAAGGUUGCAUCATT	human	Tsingke
siBRD2-3	GCUCCUUGCUGUUACUGCATT	human	Tsingke
siBRD3-1	GGACCUCAGCACCGUGAAATT	human	Tsingke
siBRD3-2	GUUCUCGAAUUGCUACAAATT	human	Tsingke
siBRD3-3	CAGAUGACAUAGUGCUAAUTT	human	Tsingke
siATG5-1	GACGUUGGUAACUGACAAA	human	Tsingke
siATG5-2	GUCCAUCUAAGGAUGCAAU	human	Tsingke
siATG5-3	GCAGAUGGACAGUUGCACA	human	Tsingke
siG9a-1	GUCUCUACUAUGAUUCCUA	human	Tsingke
siG9a-2	CGAGGUGAUCCGCAUGCUA	human	Tsingke
siG9a-3	GGAUGCUUCUGAAGCUCAA	human	Tsingke
siULK1-1	GGUACCUCCAGAGCAACAUTT	human	Tsingke
siULK1-2	CCUGUGACACAGACGACUUTT	human	Tsingke
siULK1-3	CCAAGUGCAAGCUGUGCAUTT	human	Tsingke
