# Supplementary material
Source: Research Square preprint supplement (doi:10.21203/rs.3.rs-9262139/v1)
Supplement: Supplementary file 7 [file a696bf9ba93ded908485e14f.xlsx]

## Sheet: gene
Table S4, Related to Figures 6: List of down-regulated genes with promoter CpGI hypermethylation.
Sen_SCC15_358 genes			Sen_SCC25_318 genes			Comm_Sen_SCC15&SCC25_43 genes
Gene ID	Gene Name		Gene ID	Gene Name		Gene ID	Gene Name
ENSG00000248008	NRAV		ENSG00000102760	RGCC		ENSG00000005073	HOXA11
ENSG00000005339	CREBBP		ENSG00000230453	ANKRD18B		ENSG00000069482	GAL
ENSG00000069431	ABCC9		ENSG00000159217	IGF2BP1		ENSG00000073150	PANX2
ENSG00000266714	MYO15B		ENSG00000156381	ANKRD9		ENSG00000081479	LRP2
ENSG00000184900	SUMO3		ENSG00000053918	KCNQ1		ENSG00000088881	EBF4
ENSG00000103490	PYCARD		ENSG00000240771	ARHGEF25		ENSG00000101057	MYBL2
ENSG00000164330	EBF1		ENSG00000132825	PPP1R3D		ENSG00000107821	KAZALD1
ENSG00000174371	EXO1		ENSG00000131094	C1QL1		ENSG00000109705	NKX3-2
ENSG00000169992	NLGN2		ENSG00000148357	HMCN2		ENSG00000112096	SOD2
ENSG00000115507	OTX1		ENSG00000108773	KAT2A		ENSG00000115318	LOXL3
ENSG00000130844	ZNF331		ENSG00000128408	RIBC2		ENSG00000115507	OTX1
ENSG00000188620	HMX3		ENSG00000166823	MESP1		ENSG00000123999	INHA
ENSG00000170485	NPAS2		ENSG00000136378	ADAMTS7		ENSG00000126561	STAT5A
ENSG00000090971	NAT14		ENSG00000164687	FABP5		ENSG00000126882	FAM78A
ENSG00000158445	KCNB1		ENSG00000254027			ENSG00000127561	SYNGR3
ENSG00000137135	ARHGEF39		ENSG00000260549	MT1L		ENSG00000134690	CDCA8
ENSG00000166126	AMN		ENSG00000186868	MAPT		ENSG00000141569	TRIM65
ENSG00000012963	UBR7		ENSG00000178538	CA8		ENSG00000141934	PLPP2
ENSG00000133619	KRBA1		ENSG00000004399	PLXND1		ENSG00000142611	PRDM16
ENSG00000102977	ACD		ENSG00000100297	MCM5		ENSG00000148803	FUOM
ENSG00000006704	GTF2IRD1		ENSG00000175697	GPR156		ENSG00000149633	KIAA1755
ENSG00000178764	ZHX2		ENSG00000058056	USP13		ENSG00000154134	ROBO3
ENSG00000144712	CAND2		ENSG00000122691	TWIST1		ENSG00000157064	NMNAT2
ENSG00000162073	PAQR4		ENSG00000106397	PLOD3		ENSG00000157168	NRG1
ENSG00000133106	EPSTI1		ENSG00000100321	SYNGR1		ENSG00000157833	GAREM2
ENSG00000069482	GAL		ENSG00000176406	RIMS2		ENSG00000164088	PPM1M
ENSG00000213023	SYT3		ENSG00000104332	SFRP1		ENSG00000164362	TERT
ENSG00000154760	SLFN13		ENSG00000069482	GAL		ENSG00000166126	AMN
ENSG00000184860	SDR42E1		ENSG00000092096	SLC22A17		ENSG00000166823	MESP1
ENSG00000111261	MANSC1		ENSG00000134245	WNT2B		ENSG00000167191	GPRC5B
ENSG00000176273	SLC35G1		ENSG00000172733	PURG		ENSG00000169418	NPR1
ENSG00000259374	NDUFB4P11		ENSG00000182968	SOX1		ENSG00000169992	NLGN2
ENSG00000197381	ADARB1		ENSG00000143499	SMYD2		ENSG00000171700	RGS19
ENSG00000149633	KIAA1755		ENSG00000132423	COQ3		ENSG00000174939	ASPHD1
ENSG00000115318	LOXL3		ENSG00000144893	MED12L		ENSG00000177508	IRX3
ENSG00000215788	TNFRSF25		ENSG00000154134	ROBO3		ENSG00000183186	C2CD4C
ENSG00000175426	PCSK1		ENSG00000054793	ATP9A		ENSG00000184922	FMNL1
ENSG00000183186	C2CD4C		ENSG00000135063	FAM189A2		ENSG00000197457	STMN3
ENSG00000161298	ZNF382		ENSG00000019186	CYP24A1		ENSG00000197587	DMBX1
ENSG00000124134	KCNS1		ENSG00000149948	HMGA2		ENSG00000227507	LTB
ENSG00000128165	ADM2		ENSG00000185808	PIGP		ENSG00000240771	ARHGEF25
ENSG00000116157	GPX7		ENSG00000112562	SMOC2		ENSG00000253304	TMEM200B
ENSG00000139800	ZIC5		ENSG00000121068	TBX2		ENSG00000266714	MYO15B
ENSG00000044459	CNTLN		ENSG00000082175	PGR
ENSG00000198944	SOWAHA		ENSG00000224189	HAGLR
ENSG00000087495	PHACTR3		ENSG00000173157	ADAMTS20
ENSG00000162878	PKDCC		ENSG00000102452	NALCN
ENSG00000116670	MAD2L2		ENSG00000058866	DGKG
ENSG00000112559	MDFI		ENSG00000176697	BDNF
ENSG00000270885	RASL10B		ENSG00000113430	IRX4
ENSG00000145416	MARCHF1		ENSG00000126561	STAT5A
ENSG00000172731	LRRC20		ENSG00000168389	MFSD2A
ENSG00000151725	CENPU		ENSG00000125531	FNDC11
ENSG00000110723	EXPH5		ENSG00000106004	HOXA5
ENSG00000166313	APBB1		ENSG00000149633	KIAA1755
ENSG00000107201	DDX58		ENSG00000115935	WIPF1
ENSG00000104863	LIN7B		ENSG00000183186	C2CD4C
ENSG00000167191	GPRC5B		ENSG00000129038	LOXL1
ENSG00000047621	C12orf4		ENSG00000261801	LOXL1-AS1
ENSG00000111247	RAD51AP1		ENSG00000166165	CKB
ENSG00000102878	HSF4		ENSG00000110675	ELMOD1
ENSG00000272121			ENSG00000266714	MYO15B
ENSG00000255571	MIR9-3HG		ENSG00000167191	GPRC5B
ENSG00000231453	LINC01305		ENSG00000159200	RCAN1
ENSG00000176871	WSB2		ENSG00000182263	FIGN
ENSG00000010030	ETV7		ENSG00000179967	PPP1R14BP3
ENSG00000230699			ENSG00000151376	ME3
ENSG00000123999	INHA		ENSG00000072954	TMEM38A
ENSG00000164088	PPM1M		ENSG00000112992	NNT
ENSG00000157168	NRG1		ENSG00000136840	ST6GALNAC4
ENSG00000163714	U2SURP		ENSG00000123999	INHA
ENSG00000152402	GUCY1A2		ENSG00000166546	BEAN1
ENSG00000125821	DTD1		ENSG00000234456	MAGI2-AS3
ENSG00000180447	GAS1		ENSG00000259153
ENSG00000023171	GRAMD1B		ENSG00000007516	BAIAP3
ENSG00000029534	ANK1		ENSG00000088836	SLC4A11
ENSG00000081277	PKP1		ENSG00000181856	SLC2A4
ENSG00000124795	DEK		ENSG00000198121	LPAR1
ENSG00000140398	NEIL1		ENSG00000174939	ASPHD1
ENSG00000142089	IFITM3		ENSG00000156113	KCNMA1
ENSG00000130700	GATA5		ENSG00000132932	ATP8A2
ENSG00000197457	STMN3		ENSG00000169418	NPR1
ENSG00000204791	SMPD5		ENSG00000166986	MARS1
ENSG00000169683	LRRC45		ENSG00000180801	ARSJ
ENSG00000169371	SNUPN		ENSG00000198417	MT1F
ENSG00000055332	EIF2AK2		ENSG00000081479	LRP2
ENSG00000100416	TRMU		ENSG00000034239	EFCAB1
ENSG00000154640	BTG3		ENSG00000139044	B4GALNT3
ENSG00000176092	CRYBG2		ENSG00000272325	NUDT3
ENSG00000186088	GSAP		ENSG00000261730	FOXF2-DT
ENSG00000185070	FLRT2		ENSG00000126562	WNK4
ENSG00000160233	LRRC3		ENSG00000196584	XRCC2
ENSG00000092607	TBX15		ENSG00000232850	PTGES2-AS1
ENSG00000089505	CMTM1		ENSG00000135736	CCDC102A
ENSG00000277978			ENSG00000005073	HOXA11
ENSG00000166444	DENND2B		ENSG00000068831	RASGRP2
ENSG00000166452	AKIP1		ENSG00000240859
ENSG00000005073	HOXA11		ENSG00000068028	RASSF1
ENSG00000149599	DUSP15		ENSG00000091136	LAMB1
ENSG00000179051	RCC2		ENSG00000177508	IRX3
ENSG00000125520	SLC2A4RG		ENSG00000162105	SHANK2
ENSG00000186493	C5orf38		ENSG00000101335	MYL9
ENSG00000178860	MSC		ENSG00000154240	CEP112
ENSG00000100918	REC8		ENSG00000134184	GSTM1
ENSG00000250451	HOXC-AS1		ENSG00000124074	ENKD1
ENSG00000169418	NPR1		ENSG00000157064	NMNAT2
ENSG00000130589	HELZ2		ENSG00000116852	KIF21B
ENSG00000205560	CPT1B		ENSG00000187984	ANKRD19P
ENSG00000167525	PROCA1		ENSG00000140254	DUOXA1
ENSG00000129194	SOX15		ENSG00000233223
ENSG00000158747	NBL1		ENSG00000148411	NACC2
ENSG00000277011			ENSG00000186472	PCLO
ENSG00000127561	SYNGR3		ENSG00000083067	TRPM3
ENSG00000185201	IFITM2		ENSG00000229809	ZNF688
ENSG00000250742	LINC02381		ENSG00000148773	MKI67
ENSG00000117724	CENPF		ENSG00000114933	INO80D
ENSG00000169136	ATF5		ENSG00000227946
ENSG00000213024	NUP62		ENSG00000111199	TRPV4
ENSG00000141750	STAC2		ENSG00000102879	CORO1A
ENSG00000163808	KIF15		ENSG00000143590	EFNA3
ENSG00000183773	AIFM3		ENSG00000139343	SNRPF
ENSG00000128789	PSMG2		ENSG00000254389	RHPN1-AS1
ENSG00000060749	QSER1		ENSG00000124920	MYRF
ENSG00000228594	FNDC10		ENSG00000180730	SHISA2
ENSG00000130270	ATP8B3		ENSG00000050767	COL23A1
ENSG00000130675	MNX1		ENSG00000150625	GPM6A
ENSG00000243479	MNX1-AS1		ENSG00000165124	SVEP1
ENSG00000124772	CPNE5		ENSG00000149136	SSRP1
ENSG00000120949	TNFRSF8		ENSG00000243753	HLA-L
ENSG00000140350	ANP32A		ENSG00000174885	NLRP6
ENSG00000072195	SPEG		ENSG00000103227	LMF1
ENSG00000147804	SLC39A4		ENSG00000135480	KRT7
ENSG00000142611	PRDM16		ENSG00000140323	DISP2
ENSG00000214357	NEURL1B		ENSG00000140403	DNAJA4
ENSG00000213551	DNAJC9		ENSG00000204531	POU5F1
ENSG00000091490	SEL1L3		ENSG00000101057	MYBL2
ENSG00000138160	KIF11		ENSG00000274276	CBSL
ENSG00000231419	LINC00689		ENSG00000145715	RASA1
ENSG00000132749	TESMIN		ENSG00000196074	SYCP2
ENSG00000086504	MRPL28		ENSG00000182791	CCDC87
ENSG00000179528	LBX2		ENSG00000235724
ENSG00000182870	GALNT9		ENSG00000120075	HOXB5
ENSG00000255916			ENSG00000135423	GLS2
ENSG00000266235	MIR3176		ENSG00000125744	RTN2
ENSG00000115226	FNDC4		ENSG00000133392	MYH11
ENSG00000174684	B4GAT1		ENSG00000239911	PRKAG2-AS1
ENSG00000073849	ST6GAL1		ENSG00000185818	NAT8L
ENSG00000113083	LOX		ENSG00000254122	PCDHGB7
ENSG00000185507	IRF7		ENSG00000142173	COL6A2
ENSG00000123388	HOXC11		ENSG00000164362	TERT
ENSG00000133067	LGR6		ENSG00000147955	SIGMAR1
ENSG00000127586	CHTF18		ENSG00000099204	ABLIM1
ENSG00000135740	SLC9A5		ENSG00000129195	PIMREG
ENSG00000151025	GPR158		ENSG00000259439	LINC01833
ENSG00000066735	KIF26A		ENSG00000166126	AMN
ENSG00000112715	VEGFA		ENSG00000154734	ADAMTS1
ENSG00000196872	CRACDL		ENSG00000005189	REXO5
ENSG00000154134	ROBO3		ENSG00000164199	ADGRV1
ENSG00000256542			ENSG00000253304	TMEM200B
ENSG00000138131	LOXL4		ENSG00000065413	ANKRD44
ENSG00000187553	CYP26C1		ENSG00000025039	RRAGD
ENSG00000146674	IGFBP3		ENSG00000177679	SRRM3
ENSG00000125648	SLC25A23		ENSG00000157833	GAREM2
ENSG00000130545	CRB3		ENSG00000071575	TRIB2
ENSG00000244617	ASPRV1		ENSG00000116396	KCNC4
ENSG00000171700	RGS19		ENSG00000184922	FMNL1
ENSG00000174516	PELI3		ENSG00000164128	NPY1R
ENSG00000174547	MRPL11		ENSG00000105717	PBX4
ENSG00000204335	SP5		ENSG00000187140	FOXD3
ENSG00000160207	HSF2BP		ENSG00000073150	PANX2
ENSG00000160710	ADAR		ENSG00000139579	NABP2
ENSG00000166147	FBN1		ENSG00000107821	KAZALD1
ENSG00000173457	PPP1R14B		ENSG00000139323	POC1B
ENSG00000074266	EED		ENSG00000234753	FOXP4-AS1
ENSG00000185989	RASA3		ENSG00000168758	SEMA4C
ENSG00000104321	TRPA1		ENSG00000123485	HJURP
ENSG00000162367	TAL1		ENSG00000136630	HLX
ENSG00000107719	PALD1		ENSG00000221869	CEBPD
ENSG00000163283	ALPP		ENSG00000132677	RHBG
ENSG00000163705	FANCD2OS		ENSG00000115507	OTX1
ENSG00000136997	MYC		ENSG00000182752	PAPPA
ENSG00000139973	SYT16		ENSG00000165283	STOML2
ENSG00000180264	ADGRD2		ENSG00000135074	ADAM19
ENSG00000182240	BACE2		ENSG00000148426	PROSER2
ENSG00000128714	HOXD13		ENSG00000141569	TRIM65
ENSG00000167840	ZNF232		ENSG00000165621	OXGR1
ENSG00000076242	MLH1		ENSG00000179598	PLD6
ENSG00000185187	SIGIRR		ENSG00000180535	BHLHA15
ENSG00000120697	ALG5		ENSG00000213722	DDAH2
ENSG00000120699	EXOSC8		ENSG00000171119	NRTN
ENSG00000157833	GAREM2		ENSG00000273062	RALGPS2-AS1
ENSG00000226419	SLC16A1-AS1		ENSG00000159263	SIM2
ENSG00000135315	CEP162		ENSG00000088881	EBF4
ENSG00000184922	FMNL1		ENSG00000107815	TWNK
ENSG00000267121	FMNL1-DT		ENSG00000171798	KNDC1
ENSG00000107821	KAZALD1		ENSG00000112096	SOD2
ENSG00000273162			ENSG00000119865	CNRIP1
ENSG00000142303	ADAMTS10		ENSG00000268573
ENSG00000132031	MATN3		ENSG00000157111	TMEM171
ENSG00000169255	B3GALNT1		ENSG00000122574	WIPF3
ENSG00000169813	HNRNPF		ENSG00000134690	CDCA8
ENSG00000145945	FAM50B		ENSG00000135272	MDFIC
ENSG00000130244	FAM98C		ENSG00000204583	LRCOL1
ENSG00000162512	SDC3		ENSG00000106070	GRB10
ENSG00000132326	PER2		ENSG00000115232	ITGA4
ENSG00000138658	ZGRF1		ENSG00000197587	DMBX1
ENSG00000170049	KCNAB3		ENSG00000170779	CDCA4
ENSG00000232434	AJM1		ENSG00000255535
ENSG00000116212	LRRC42		ENSG00000279198
ENSG00000181991	MRPS11		ENSG00000087076	HSD17B14
ENSG00000038295	TLL1		ENSG00000149499	EML3
ENSG00000142102	PGGHG		ENSG00000077942	FBLN1
ENSG00000245685	FRG1-DT		ENSG00000158528	PPP1R9A
ENSG00000126561	STAT5A		ENSG00000101265	RASSF2
ENSG00000166803	PCLAF		ENSG00000165025	SYK
ENSG00000107833	NPM3		ENSG00000169598	DFFB
ENSG00000166823	MESP1		ENSG00000178053	MLF1
ENSG00000101057	MYBL2		ENSG00000149050	ZNF214
ENSG00000284976			ENSG00000160813	PPP1R35
ENSG00000030066	NUP160		ENSG00000231389	HLA-DPA1
ENSG00000174939	ASPHD1		ENSG00000083290	ULK2
ENSG00000116017	ARID3A		ENSG00000132016	BRME1
ENSG00000180884	ZNF792		ENSG00000185100	ADSS1
ENSG00000114115	RBP1		ENSG00000069667	RORA
ENSG00000173621	LRFN4		ENSG00000099194	SCD
ENSG00000171160	MORN4		ENSG00000168243	GNG4
ENSG00000204435	CSNK2B		ENSG00000157168	NRG1
ENSG00000204438	GPANK1		ENSG00000260088	DDX59-AS1
ENSG00000272512			ENSG00000105974	CAV1
ENSG00000139874	SSTR1		ENSG00000128849	CGNL1
ENSG00000133265	HSPBP1		ENSG00000240093
ENSG00000099864	PALM		ENSG00000109084	TMEM97
ENSG00000141569	TRIM65		ENSG00000166250	CLMP
ENSG00000158156	XKR8		ENSG00000240280	TCAM1P
ENSG00000134690	CDCA8		ENSG00000130720	FIBCD1
ENSG00000196810	CTBP1-DT		ENSG00000169174	PCSK9
ENSG00000081479	LRP2		ENSG00000171700	RGS19
ENSG00000128951	DUT		ENSG00000183840	GPR39
ENSG00000141696	P3H4		ENSG00000171105	INSR
ENSG00000141756	FKBP10		ENSG00000124466	LYPD3
ENSG00000162066	AMDHD2		ENSG00000142611	PRDM16
ENSG00000122378	PRXL2A		ENSG00000198892	SHISA4
ENSG00000258920	FOXN3-AS1		ENSG00000152804	HHEX
ENSG00000106538	RARRES2		ENSG00000124257	NEURL2
ENSG00000177788			ENSG00000214013	GANC
ENSG00000180340	FZD2		ENSG00000156509	FBXO43
ENSG00000160932	LY6E		ENSG00000181444	ZNF467
ENSG00000247317	LY6E-DT		ENSG00000134222	PSRC1
ENSG00000170837	GPR27		ENSG00000139835	GRTP1
ENSG00000197696	NMB		ENSG00000128596	CCDC136
ENSG00000162882	HAAO		ENSG00000109794	FAM149A
ENSG00000183765	CHEK2		ENSG00000129757	CDKN1C
ENSG00000173557	FAM166C		ENSG00000136352	NKX2-1
ENSG00000137273	FOXF2		ENSG00000174718	RESF1
ENSG00000237649	KIFC1		ENSG00000117245	KIF17
ENSG00000116819	TFAP2E		ENSG00000107130	NCS1
ENSG00000003402	CFLAR		ENSG00000170396	ZNF804A
ENSG00000144891	AGTR1		ENSG00000148803	FUOM
ENSG00000178163	ZNF518B		ENSG00000164088	PPM1M
ENSG00000177508	IRX3		ENSG00000181284	TMEM102
ENSG00000138028	CGREF1		ENSG00000184058	TBX1
ENSG00000120162	MOB3B		ENSG00000256663
ENSG00000103495	MAZ		ENSG00000170425	ADORA2B
ENSG00000134758	RNF138		ENSG00000131459	GFPT2
ENSG00000169126	ODAD2		ENSG00000168993	CPLX1
ENSG00000100300	TSPO		ENSG00000185924	RTN4RL1
ENSG00000182183	SHISAL2A		ENSG00000172059	KLF11
ENSG00000254254			ENSG00000130477	UNC13A
ENSG00000159842	ABR		ENSG00000178821	TMEM52
ENSG00000139211	AMIGO2		ENSG00000187566	NHLRC1
ENSG00000197587	DMBX1		ENSG00000130487	KLHDC7B
ENSG00000005882	PDK2		ENSG00000164056	SPRY1
ENSG00000103202	NME4		ENSG00000073756	PTGS2
ENSG00000171812	COL8A2		ENSG00000169992	NLGN2
ENSG00000228672	PROB1		ENSG00000059377	TBXAS1
ENSG00000172164	SNTB1		ENSG00000109705	NKX3-2
ENSG00000120899	PTK2B		ENSG00000123268	ATF1
ENSG00000177932	ZNF354C		ENSG00000155629	PIK3AP1
ENSG00000147813	NAPRT		ENSG00000197457	STMN3
ENSG00000142700	DMRTA2		ENSG00000188060	RAB42
ENSG00000189308	LIN54		ENSG00000141934	PLPP2
ENSG00000204267	TAP2		ENSG00000107518	ATRNL1
ENSG00000160051	IQCC		ENSG00000132359	RAP1GAP2
ENSG00000161800	RACGAP1		ENSG00000242193	CRYZL2P
ENSG00000227507	LTB		ENSG00000227507	LTB
ENSG00000255690	TRIL		ENSG00000162676	GFI1
ENSG00000181085	MAPK15		ENSG00000115318	LOXL3
ENSG00000205089	CCNI2		ENSG00000179082	C9orf106
ENSG00000151468	CCDC3		ENSG00000177706	FAM20C
ENSG00000197771	MCMBP		ENSG00000169733	RFNG
ENSG00000089116	LHX5		ENSG00000129467	ADCY4
ENSG00000162607	USP1		ENSG00000003989	SLC7A2
ENSG00000204642	HLA-F		ENSG00000153404	PLEKHG4B
ENSG00000197291	RAMP2-AS1		ENSG00000139567	ACVRL1
ENSG00000107957	SH3PXD2A		ENSG00000136383	ALPK3
ENSG00000180921	FAM83H		ENSG00000186417	GLDN
ENSG00000253304	TMEM200B		ENSG00000101115	SALL4
ENSG00000184661	CDCA2		ENSG00000136261	BZW2
ENSG00000148803	FUOM		ENSG00000090376	IRAK3
ENSG00000245857	GS1-24F4.2		ENSG00000165816	VWA2
ENSG00000275591	XKR5		ENSG00000127561	SYNGR3
ENSG00000171488	LRRC8C		ENSG00000167815	PRDX2
ENSG00000143355	LHX9		ENSG00000107281	NPDC1
ENSG00000171791	BCL2		ENSG00000135625	EGR4
ENSG00000092621	PHGDH		ENSG00000233429	HOTAIRM1
ENSG00000136098	NEK3		ENSG00000278291
ENSG00000164897	TMUB1		ENSG00000185090	MANEAL
ENSG00000184271	POU6F1		ENSG00000177459	ERICH5
ENSG00000112096	SOD2		ENSG00000182199	SHMT2
ENSG00000120437	ACAT2		ENSG00000175414	ARL10
ENSG00000163040	CCDC74A		ENSG00000214290	COLCA2
ENSG00000157064	NMNAT2		ENSG00000126882	FAM78A
ENSG00000170175	CHRNB1		ENSG00000164104	HMGB2
ENSG00000183072	NKX2-5		ENSG00000164611	PTTG1
ENSG00000163430	FSTL1		ENSG00000183734	ASCL2
ENSG00000182223	ZAR1		ENSG00000164647	STEAP1
ENSG00000196367	TRRAP		ENSG00000073146	MOV10L1
ENSG00000182481	KPNA2		ENSG00000174059	CD34
ENSG00000154027	AK5
ENSG00000184792	OSBP2
ENSG00000240498	CDKN2B-AS1
ENSG00000175707	KDF1
ENSG00000064932	SBNO2
ENSG00000196230	TUBB
ENSG00000184986	TMEM121
ENSG00000100626	GALNT16
ENSG00000079308	TNS1
ENSG00000213694	S1PR3
ENSG00000123737	EXOSC9
ENSG00000126882	FAM78A
ENSG00000145247	OCIAD2
ENSG00000240771	ARHGEF25
ENSG00000136108	CKAP2
ENSG00000189409	MMP23B
ENSG00000164362	TERT
ENSG00000158691	ZSCAN12
ENSG00000136147	PHF11
ENSG00000104147	OIP5
ENSG00000112183	RBM24
ENSG00000113810	SMC4
ENSG00000134247	PTGFRN
ENSG00000073150	PANX2
ENSG00000161798	AQP5
ENSG00000088881	EBF4
ENSG00000104413	ESRP1
ENSG00000067082	KLF6
ENSG00000204923	FBXO48
ENSG00000164066	INTU
ENSG00000143390	RFX5
ENSG00000112144	CILK1
ENSG00000103241	FOXF1
ENSG00000214575	CPEB1
ENSG00000141934	PLPP2
ENSG00000227082	LINC02798
ENSG00000165474	GJB2
ENSG00000109705	NKX3-2
ENSG00000137312	FLOT1
ENSG00000065882	TBC1D1
