# Supplementary material
Source: Research Square preprint supplement (doi:10.21203/rs.3.rs-9262139/v1)
Supplement: Supplementary file 8 [file c043de319b9f8c254fdbdc69.xlsx]

## Sheet: Fig 3E-15
Fig3E-SCC15
IL1B																				IL1B
NAME	CT1	CT2	CT3	RefCT1	RefCT2	RefCT3	△CT1	△CT2	△CT3	Average	△△CT1	△△CT2	△△CT3	2-△△CT1	2-△△CT2	2-△△CT3	Average	SD	SE
15-0	25.15	25.06	25.16	14.34	14.3	14.33	10.81	10.76	10.83	10.8	0.01	-0.04	0.03	0.993092	1.02811	0.97942	1.00021	0.0251147	0.0145004		0.993092	0.48971	0.30566	0.168404
15-0.1	26.83	26.51	26.76	15	15.01	15	11.83	11.5	11.76		1.03	0.7	0.96	0.48971	0.615572	0.514057	0.53978	0.0667575	0.0385436		1.02811	0.615572	0.323088	0.168404
15-0.5	26.71	26.65	26.6	14.2	14.22	14.22	12.51	12.43	12.38		1.71	1.63	1.58	0.30566	0.323088	0.334482	0.321077	0.0145158	0.00838096		0.97942	0.514057	0.334482	0.183011
15-1	27.58	27.52	27.43	14.21	14.15	14.18	13.37	13.37	13.25		2.57	2.57	2.45	0.168404	0.168404	0.183011	0.173273	0.00843308	0.00486898
IL1A																				IL1A
NAME	CT1	CT2	CT3	RefCT1	RefCT2	RefCT3	△CT1	△CT2	△CT3	Average	△△CT1	△△CT2	△△CT3	2-△△CT1	2-△△CT2	2-△△CT3	Average	SD	SE
15-0	24.34	24.37	24.37	14.34	14.3	14.33	10	10.07	10.04	10.0367	-0.0366667	0.0333333	0.00333333	1.02574	0.97716	0.997692	1.0002	0.0243873	0.0140804		1.02574	0.4954	0.229516	0.300756
15-0.1	26.05	26.04	25.97	15	15.01	15	11.05	11.03	10.97		1.01333	0.993333	0.933333	0.4954	0.502316	0.523647	0.507121	0.0147237	0.00850098		0.97716	0.502316	0.24429	0.304955
15-0.5	26.36	26.29	26.23	14.2	14.22	14.22	12.16	12.07	12.01		2.12333	2.03333	1.97333	0.229516	0.24429	0.254664	0.242823	0.012638	0.00729675		0.997692	0.523647	0.254664	0.284533
15-1	25.98	25.9	26.03	14.21	14.15	14.18	11.77	11.75	11.85		1.73333	1.71333	1.81333	0.300756	0.304955	0.284533	0.296748	0.0107849	0.00622684
CXCL1																				CXCL1
NAME	CT1	CT2	CT3	RefCT1	RefCT2	RefCT3	△CT1	△CT2	△CT3	Average	△△CT1	△△CT2	△△CT3	2-△△CT1	2-△△CT2	2-△△CT3	Average	SD	SE
15-0	19.67	19.66	19.66	14.94	14.9	14.87	4.73	4.76	4.79	4.76	-0.03	0	0.03	1.02101	1	0.97942	1.00014	0.0207963	0.0120071		1.02101	0.303549	0.230047	0.251739
15-0.1	21.04	20.83	20.85	14.56	14.52	14.54	6.48	6.31	6.31		1.72	1.55	1.55	0.303549	0.34151	0.34151	0.328856	0.021917	0.0126542		1	0.34151	0.219151	0.234881
15-0.5	21.13	21.14	21.18	14.25	14.19	14.25	6.88	6.95	6.93		2.12	2.19	2.17	0.230047	0.219151	0.222211	0.223803	0.00561957	0.00324455		0.97942	0.34151	0.222211	0.236514
15-1	20.86	20.9	20.89	14.11	14.05	14.05	6.75	6.85	6.84		1.99	2.09	2.08	0.251739	0.234881	0.236514	0.241045	0.00929742	0.00536803
IL6																				IL6
NAME	CT1	CT2	CT3	RefCT1	RefCT2	RefCT3	△CT1	△CT2	△CT3	Average	△△CT1	△△CT2	△△CT3	2-△△CT1	2-△△CT2	2-△△CT3	Average	SD	SE
15-0	18.5	18.53	18.51	14.94	14.9	14.87	3.56	3.63	3.64	3.61	-0.05	0.02	0.03	1.03526	0.986233	0.97942	1.00031	0.0304663	0.0175903		1.03526	0.25349	0.136787	0.0883883
15-0.1	20.15	20.23	19.98	14.56	14.52	14.54	5.59	5.71	5.44		1.98	2.1	1.83	0.25349	0.233258	0.281265	0.256004	0.0241018	0.0139156		0.986233	0.233258	0.11344	0.076415
15-0.5	20.73	20.94	21.01	14.25	14.19	14.25	6.48	6.75	6.76		2.87	3.14	3.15	0.136787	0.11344	0.112656	0.120961	0.0137111	0.00791634		0.97942	0.281265	0.112656	0.076415
15-1	21.22	21.37	21.37	14.11	14.05	14.05	7.11	7.32	7.32		3.5	3.71	3.71	0.0883883	0.076415	0.076415	0.0804061	0.00691281	0.00399123
IL8																				IL8
NAME	CT1	CT2	CT3	RefCT1	RefCT2	RefCT3	△CT1	△CT2	△CT3	Average	△△CT1	△△CT2	△△CT3	2-△△CT1	2-△△CT2	2-△△CT3	Average	SD	SE
15-0	21.57	21.98	22.08	14.37	14.36	14.39	7.2	7.62	7.69	7.50333	-0.303333	0.116667	0.186667	1.23399	0.922316	0.878633	1.01165	0.193791	0.111889		1.23399	0.713672	1.56193	1.99078
15-0.1	22.86	22.84	22.83	14.87	14.89	14.96	7.99	7.95	7.87		0.486667	0.446667	0.366667	0.713672	0.733736	0.775572	0.740994	0.0315818	0.0182343		0.922316	0.733736	1.68568	2.13366
15-0.5	21.18	21.09	21.18	14.32	14.34	14.41	6.86	6.75	6.77		-0.643333	-0.753333	-0.733333	1.56193	1.68568	1.66248	1.6367	0.0657789	0.0379786		0.878633	0.775572	1.66248	2.1785
15-1	20.47	20.44	20.41	13.96	14.03	14.03	6.51	6.41	6.38		-0.993333	-1.09333	-1.12333	1.99078	2.13366	2.1785	2.10098	0.0980342	0.0566017
CCL2																				CCL2
NAME	CT1	CT2	CT3	RefCT1	RefCT2	RefCT3	△CT1	△CT2	△CT3	Average	△△CT1	△△CT2	△△CT3	2-△△CT1	2-△△CT2	2-△△CT3	Average	SD	SE
15-0	19.46	19.37	19.32	14.37	14.36	14.39	5.09	5.01	4.93	5.01	0.08	0	-0.08	0.946058	1	1.05702	1.00103	0.0554873	0.0320365		0.946058	0.907519	0.450625	0.178006
15-0.1	20.02	20.36	20.31	14.87	14.89	14.96	5.15	5.47	5.35		0.14	0.46	0.34	0.907519	0.726986	0.790041	0.808182	0.0916234	0.0529004		1	0.726986	0.34151	0.185565
15-0.5	20.48	20.9	20.88	14.32	14.34	14.41	6.16	6.56	6.47		1.15	1.55	1.46	0.450625	0.34151	0.363493	0.385209	0.0577081	0.0333188		1.05702	0.790041	0.363493	0.188156
15-1	21.46	21.47	21.45	13.96	14.03	14.03	7.5	7.44	7.42		2.49	2.43	2.41	0.178006	0.185565	0.188156	0.183909	0.0052736	0.0030448
MMP3																				MMP3
NAME	CT1	CT2	CT3	RefCT1	RefCT2	RefCT3	△CT1	△CT2	△CT3	Average	△△CT1	△△CT2	△△CT3	2-△△CT1	2-△△CT2	2-△△CT3	Average	SD	SE
15-0	28.45	27.52	29.06	14.37	14.36	14.39	14.08	13.16	14.67	13.97	0.11	-0.81	0.7	0.926588	1.75321	0.615572	1.09846	0.587971	0.339475		0.926588	1.75321	6.40856	10.5561
15-0.1	28.03	28.71	27.88	14.87	14.89	14.96	13.16	13.82	12.92		-0.81	-0.15	-1.05	1.75321	1.10957	2.07053	1.64444	0.489628	0.282695		1.75321	1.10957	6.36429	11.0043
15-0.5	25.61	25.64	25.69	14.32	14.34	14.41	11.29	11.3	11.28		-2.68	-2.67	-2.69	6.40856	6.36429	6.45313	6.40866	0.0444212	0.0256473		0.615572	2.07053	6.45313	9.78112
15-1	24.53	24.54	24.71	13.96	14.03	14.03	10.57	10.51	10.68		-3.4	-3.46	-3.29	10.5561	11.0043	9.78112	10.4472	0.618833	0.357294
Fig3E-SCC25
IL1B
NAME	CT1	CT2	CT3	RefCT1	RefCT2	RefCT3	△CT1	△CT2	△CT3	Average	△△CT1	△△CT2	△△CT3	2-△△CT1	2-△△CT2	2-△△CT3	Average	SD	SE
15-0	19.6154	19.542	19.5744	15.5266	15.5267	15.5428	4.08879	4.01524	4.03163	4.04522	0.0435702	-0.02998	-0.0135902	0.970251	1.021	1.00946	1.00024	0.026602	0.0153591
15-0.1	20.9567	20.9766	20.9307	15.4096	15.3579	15.3609	5.54703	5.61865	5.5698		1.50181	1.57343	1.52458	0.353111	0.336009	0.34758	0.345567	0.00872713	0.00503876
15-0.5	22.867	22.919	22.9163	14.7167	14.6507	14.6552	8.15025	8.26823	8.26109		4.10502	4.223	4.21587	0.0581118	0.0535487	0.0538143	0.0551583	0.00256132	0.00147882
15-1	23.4803	23.5311	23.4372	14.8812	14.7637	14.7784	8.59907	8.76739	8.65881		4.55385	4.72216	4.61359	0.042575	0.0378867	0.0408481	0.0404366	0.00237108	0.00136898
IL1A
NAME	CT1	CT2	CT3	RefCT1	RefCT2	RefCT3	△CT1	△CT2	△CT3	Average	△△CT1	△△CT2	△△CT3	2-△△CT1	2-△△CT2	2-△△CT3	Average	SD	SE
15-0	19.778	19.8049	19.6973	15.5266	15.5267	15.5428	4.25138	4.27823	4.15451	4.22804	0.0233396	0.0501884	-0.073528	0.983952	0.96581	1.05229	1.00068	0.0456014	0.0263288
15-0.1	21.8632	21.9365	21.952	15.4096	15.3579	15.3609	6.45352	6.57862	6.59112		2.22549	2.35058	2.36308	0.213827	0.196067	0.194376	0.201423	0.0107752	0.00622122
15-0.5	24.761	24.855	24.8295	14.7167	14.6507	14.6552	10.0442	10.2043	10.1743		5.81619	5.97624	5.94625	0.0177481	0.0158844	0.0162181	0.0166169	0.000993765	0.000573767
15-1	25.6415	25.7068	25.6616	14.8812	14.7637	14.7784	10.7603	10.9431	10.8832		6.5323	6.71511	6.65515	0.0108039	0.00951811	0.00992204	0.0100814	0.000657555	0.000379651
CXCL1
NAME	CT1	CT2	CT3	RefCT1	RefCT2	RefCT3	△CT1	△CT2	△CT3	Average	△△CT1	△△CT2	△△CT3	2-△△CT1	2-△△CT2	2-△△CT3	Average	SD	SE
15-0	19.6125	19.586	19.5863	15.6349	15.8107	15.7602	3.97764	3.77533	3.8261	3.85969	0.117947	-0.0843585	-0.0335887	0.921498	1.06022	1.02356	1.00176	0.0718824	0.0415026
15-0.1	20.9322	20.9359	20.9079	15.5907	15.6423	15.6777	5.34148	5.29365	5.23022		1.48179	1.43396	1.37054	0.358044	0.370114	0.386748	0.371635	0.014412	0.00832099
15-0.5	21.9316	21.881	21.8484	14.7058	14.7971	14.8194	7.22579	7.08382	7.02901		3.3661	3.22414	3.16932	0.0969848	0.107013	0.111158	0.105052	0.0072872	0.00420739
15-1	21.899	21.8386	21.8685	14.8997	14.8427	14.9156	6.99931	6.99589	6.95296		3.13962	3.1362	3.09327	0.11347	0.113739	0.117174	0.114794	0.00206524	0.0011924
IL6
NAME	CT1	CT2	CT3	RefCT1	RefCT2	RefCT3	△CT1	△CT2	△CT3	Average	△△CT1	△△CT2	△△CT3	2-△△CT1	2-△△CT2	2-△△CT3	Average	SD	SE
15-0	23.9289	23.9123	23.9044	15.6349	15.8107	15.7602	8.29399	8.10165	8.1442	8.17995	0.114045	-0.0783008	-0.035744	0.923994	1.05577	1.02509	1.00162	0.0689532	0.0398113
15-0.1	22.0484	20.844	22.1006	15.5907	15.6423	15.6777	6.45768	5.20174	6.42286		-1.72226	-2.97821	-1.75708	3.29954	7.88007	3.38014	3.33984	0.0569937	0.0329063
15-0.5	21.0232	21.0331	21.0409	14.7058	14.7971	14.8194	6.31739	6.23593	6.22146		-1.86256	-1.94402	-1.95848	3.63652	3.84776	3.88653	3.79027	0.134554	0.0776872
15-1	21.4566	21.2437	21.264	14.8997	14.8427	14.9156	6.55687	6.40098	6.34846		-1.62308	-1.77896	-1.83149	3.08032	3.4318	3.55904	3.35705	0.247958	0.143163
IL8
NAME	CT1	CT2	CT3	RefCT1	RefCT2	RefCT3	△CT1	△CT2	△CT3	Average	△△CT1	△△CT2	△△CT3	2-△△CT1	2-△△CT2	2-△△CT3	Average	SD	SE
15-0	17.9152	17.7884	17.8137	15.6349	15.8107	15.7602	2.28027	1.97771	2.05348	2.10382	0.176453	-0.126115	-0.0503378	0.884876	1.09135	1.03551	1.00391	0.106802	0.061664
15-0.1	18.9185	18.9192	18.9268	15.5907	15.6423	15.6777	3.32785	3.27692	3.24907		1.22403	1.1731	1.14525	0.428085	0.443467	0.452112	0.441221	0.0121702	0.00702665
15-0.5	19.482	19.4885	19.5284	14.7058	14.7971	14.8194	4.77623	4.6914	4.70893		2.67241	2.58757	2.60511	0.156864	0.166365	0.164355	0.162528	0.00500696	0.00289085
15-1	19.8116	19.7667	19.828	14.8997	14.8427	14.9156	4.91183	4.92396	4.91246		2.80801	2.82014	2.80864	0.142793	0.141597	0.14273	0.142373	0.000673095	0.000388623
CCL2
NAME	CT1	CT2	CT3	RefCT1	RefCT2	RefCT3	△CT1	△CT2	△CT3	Average	△△CT1	△△CT2	△△CT3	2-△△CT1	2-△△CT2	2-△△CT3	Average	SD	SE
15-0	23.9615	23.9223	23.9325	15.6349	15.8107	15.7602	8.32658	8.11159	8.17228	8.20348	0.1231	-0.0918932	-0.0312071	0.918212	1.06577	1.02187	1.00195	0.0757674	0.0437456
15-0.1	22.4286	22.4203	22.4057	15.5907	15.6423	15.6777	6.83789	6.778	6.72799		-1.36559	-1.42548	-1.47549	2.57682	2.68604	2.78079	2.68122	0.102067	0.0589303
15-0.5	21.4469	21.3902	21.3704	14.7058	14.7971	14.8194	6.74115	6.59305	6.55095		-1.46234	-1.61044	-1.65253	2.75554	3.05344	3.14385	2.98428	0.203183	0.117311
15-1	21.6388	21.4795	21.4641	14.8997	14.8427	14.9156	6.7391	6.63672	6.54851		-1.46439	-1.56677	-1.65497	2.75946	2.9624	3.14918	2.95701	0.194915	0.112538
MMP3
NAME	CT1	CT2	CT3	RefCT1	RefCT2	RefCT3	△CT1	△CT2	△CT3	Average	△△CT1	△△CT2	△△CT3	2-△△CT1	2-△△CT2	2-△△CT3	Average	SD	SE
15-0	29.4346	29.3491	29.2138	15.6349	15.8107	15.7602	13.7997	13.5384	13.4536	13.5972	0.202435	-0.0588217	-0.143613	0.869083	1.04161	1.10467	1.00512	0.121959	0.0704149
15-0.1	31.7351	31.6011	31.0633	15.5907	15.6423	15.6777	16.1444	15.9588	15.3856		2.54719	2.36154	1.78837	0.171088	0.194583	0.289499	0.21839	0.0626929	0.0361969
15-0.5	32.932	31.505	32.5324	14.7058	14.7971	14.8194	18.2262	16.7079	17.7129		4.62901	3.11066	4.11569	0.0404139	0.115771	0.0576836	0.0712894	0.0394778	0.0227932
15-1	31.6087	31.6235	30.7704	14.8997	14.8427	14.9156	16.709	16.7807	15.8548		3.11176	3.18351	2.25757	0.115682	0.11007	0.209124	0.144959	0.0556394	0.0321244
FigS2D
MKN45
IL1A
NAME	CT1	CT2	CT3	RefCT1	RefCT2	RefCT3	△CT1	△CT2	△CT3	Average	△△CT1	△△CT2	△△CT3	2-△△CT1	2-△△CT2	2-△△CT3	Average	SD	SE
MKN45-DMSO	24.34	24.37	24.37	14.34	14.3	14.33	10	10.07	10.04	10.0367	-0.0366667	0.0333333	0.00333333	1.02574	0.97716	0.997692	1.0002	0.0243873	0.0140804
MKN45-JQ1	26.05	26.04	25.97	15	15.01	15	11.05	11.03	10.97		1.01333	0.993333	0.933333	0.4954	0.502316	0.523647	0.507121	0.0147237	0.00850098
IL6
NAME	CT1	CT2	CT3	RefCT1	RefCT2	RefCT3	△CT1	△CT2	△CT3	Average	△△CT1	△△CT2	△△CT3	2-△△CT1	2-△△CT2	2-△△CT3	Average	SD	SE
MKN45-DMSO	22.22	22	22.12	15.62	15.5	15.31	6.6	6.5	6.81	6.63667	-0.0366667	-0.136667	0.173333	1.02574	1.09936	0.886791	1.00396	0.107946	0.0623242
MKN45-JQ1	28.28	28.2	28.38	17.14	17	17.02	11.14	11.2	11.36		4.50333	4.56333	4.72333	0.0440922	0.042296	0.037856	0.0414148	0.00321013	0.00185342
CXCL8
NAME	CT1	CT2	CT3	RefCT1	RefCT2	RefCT3	△CT1	△CT2	△CT3	Average	△△CT1	△△CT2	△△CT3	2-△△CT1	2-△△CT2	2-△△CT3	Average	SD	SE
MKN45-DMSO	18.19	18.32	18.34	15	15.05	15.4	3.19	3.27	2.94	3.13333	0.0566667	0.136667	-0.193333	0.961483	0.909618	1.1434	1.00483	0.122773	0.0708852
MKN45-JQ1	26.01	26.02	26.09	16.87	16.86	16.86	9.14	9.16	9.23		6.00667	6.02667	6.09667	0.015553	0.0153388	0.0146124	0.0151681	0.000493009	0.000284647
MDA-MB-231
IL1A
NAME	CT1	CT2	CT3	RefCT1	RefCT2	RefCT3	△CT1	△CT2	△CT3	Average	△△CT1	△△CT2	△△CT3	2-△△CT1	2-△△CT2	2-△△CT3	Average	SD	SE
MDA-MB-231-DMSO	24.15	24.32	24.08	12.06	12.09	12.09	12.09	12.23	11.99	12.1033	-0.0133333	0.126667	-0.113333	1.00928	0.915945	1.08172	1.00232	0.083109	0.0479844
MDA-MB-231-JQ1	26.05	26.01	26.01	11.28	11.05	11.04	14.77	14.96	14.97		2.66667	2.85667	2.86667	0.15749	0.138057	0.137103	0.144217	0.011505	0.00664263
IL6
NAME	CT1	CT2	CT3	RefCT1	RefCT2	RefCT3	△CT1	△CT2	△CT3	Average	△△CT1	△△CT2	△△CT3	2-△△CT1	2-△△CT2	2-△△CT3	Average	SD	SE
MDA-MB-231-DMSO	24	24.02	24	12.06	12.09	12.09	11.94	11.93	11.91	11.9267	0.0133333	0.00333333	-0.0166667	0.990801	0.997692	1.01162	1.00004	0.0106057	0.00612339
MDA-MB-231-JQ1	26.2	26.06	26.31	11.28	11.05	11.04	14.92	15.01	15.27		2.99333	3.08333	3.34333	0.125579	0.117984	0.0985273	0.11403	0.0139526	0.00805577
CXCL8
NAME	CT1	CT2	CT3	RefCT1	RefCT2	RefCT3	△CT1	△CT2	△CT3	Average	△△CT1	△△CT2	△△CT3	2-△△CT1	2-△△CT2	2-△△CT3	Average	SD	SE
MDA-MB-231-DMSO	24.23	24.14	24	12.06	12.09	12.09	12.17	12.05	11.91	12.0433	0.126667	0.00666667	-0.133333	0.915945	0.99539	1.09682	1.00272	0.0906624	0.0523455
MDA-MB-231-JQ1	25.16	25.21	25.24	11.28	11.05	11.04	13.88	14.16	14.2		1.83667	2.11667	2.15667	0.279968	0.230579	0.224274	0.24494	0.0304982	0.0176087
Fig5F
SCC15					SCC25
NAME	CT1	CT2	CT3		NAME	CT1	CT2	CT3
DMSO-Input	27.2855	27.3728	27.1425		DMSO-Input	26.4138	26.7677	27.0514
DMSO-IP	30.642	31.0521			DMSO-IP	28.9984	29.0441	29.097
DMSO-Input	27.8235	27.5986	27.6886		DMSO-Input	26.8541	26.8902	26.8194
DMSO-IgG	33.1661	32.8635			DMSO-IgG	31.6585	32.2261	31.6215
JQ1-Input	26.5476	26.8408	27.2304		JQ1-Input	26.1457	25.8764	26.0386
JQ1-IP	30.6394	30.3509	30.7868		JQ1-IP	25.7624	25.9742	25.8589
JQ1-Input	26.4952	26.5271	26.4653		JQ1-Input	25.7685	25.6513	26.0855
JQ1-IgG	30.9072	31.4768	31.4978		JQ1-IgG	27.1466	27.0102	27.0219
NAME	CT1	CT2	CT3		NAME	CT1	CT2	CT3
DMSO-Input	31.1648	31.7428			DMSO-Input	23.9328	23.4313
DMSO-IP	30.4381	31.4702			DMSO-IP	28.4228	27.4233
DMSO-Input	28.8051	28.5168	28.7026		DMSO-Input	25.7854	24.8745
DMSO-IgG	30.4166	30.3147			DMSO-IgG	32.5552	31.373
JQ1-Input	29.9261	29.5562	29.9767		JQ1-Input	24.2306	24.1823
JQ1-IP	31.1308	31.6821	31.6418		JQ1-IP	27.679	27.8411
JQ1-Input	31.0001	30.7541			JQ1-Input	25.157	24.495
JQ1-IgG	32.4442	33.2932			JQ1-IgG	31.0154	29.4613
NAME	CT1	CT2	CT3		NAME	CT1	CT2	CT3
DMSO-Input	30.4809	30.641	30.6352		DMSO-Input	27.3761	27.097	27.0946
DMSO-IP	31.0603	31.2841	31.6493		DMSO-IP	29.003	29.2592
DMSO-Input	31.0842	30.193	30.8033		DMSO-Input	27.0079	27.0426	26.8539
DMSO-IgG	33.3831	33.2219			DMSO-IgG	31.1385	31.2777
JQ1-Input	29.1377	28.8674	29.2843		JQ1-Input	26.2718	26.185	26.1577
JQ1-IP	32.3642	33.0585			JQ1-IP	25.7991	26.0967	26.01
JQ1-Input	27.5941	27.1444			JQ1-Input	25.5608	25.5042	25.6022
JQ1-IgG	31.2932	32.1334			JQ1-IgG	27.2151	26.9374	27.1387
Fig7D
5’UTR
NAME	CT1	CT2	CT3	RefCT1	RefCT2	RefCT3	△CT1	△CT2	△CT3	Average	△△CT1	△△CT2	△△CT3	2-△△CT1	2-△△CT2	2-△△CT3	Average	SD	SE
SCC15-DMSO	18.386	18.3251	18.3383	16.8883	16.8092	16.8904	1.49768	1.51589	1.44786	1.48714	0.0105394	0.0287434	-0.0392828	0.992721	0.980274	1.0276	1.0002	0.0245347	0.0141655
SCC15-JQ1	18.1386	18.2865	18.13	16.0245	16.003	16.0266	2.11403	2.28354	2.10337		0.626884	0.796393	0.61623	0.647573	0.575787	0.652373	0.625245	0.0428988	0.0247684
ORF1
NAME	CT1	CT2	CT3	RefCT1	RefCT2	RefCT3	△CT1	△CT2	△CT3	Average	△△CT1	△△CT2	△△CT3	2-△△CT1	2-△△CT2	2-△△CT3	Average	SD	SE
SCC15-DMSO	17.9054	17.7537	17.7543	16.8883	16.8092	16.8904	1.01711	0.944413	0.863889	0.941803	0.0753037	0.00261001	-0.0779137	0.949142	0.998193	1.05549	1.00094	0.0532274	0.0307317
SCC15-JQ1	17.2648	17.1746	17.0915	16.0245	16.003	16.0266	1.24024	1.17159	1.06485		0.298439	0.229788	0.123046	0.813132	0.85276	0.918247	0.861379	0.0530851	0.0306496
ORF2
NAME	CT1	CT2	CT3	RefCT1	RefCT2	RefCT3	△CT1	△CT2	△CT3	Average	△△CT1	△△CT2	△△CT3	2-△△CT1	2-△△CT2	2-△△CT3	Average	SD	SE
SCC15-DMSO	16.9954	17.0412	16.879	16.8883	16.8092	16.8904	0.107094	0.231922	-0.011393	0.109208	-0.00211339	0.122714	-0.120601	1.00147	0.918458	1.08719	1.00237	0.0843683	0.0487115
SCC15-JQ1	16.5363	16.2419	16.4303	16.0245	16.003	16.0266	0.511756	0.238898	0.403693		0.402548	0.129691	0.294485	0.756521	0.914027	0.815363	0.828637	0.0795878	0.0459514
5’UTR
NAME	CT1	CT2	CT3	RefCT1	RefCT2	RefCT3	△CT1	△CT2	△CT3	Average	△△CT1	△△CT2	△△CT3	2-△△CT1	2-△△CT2	2-△△CT3	Average	SD	SE
SCC25-DMSO	19.18	19.15	19.15	18.22	18.08	18.26	0.96	1.07	0.89	0.973333	-0.0133333	0.0966667	-0.0833333	1.00928	0.935191	1.05946	1.00131	0.0625183	0.036096
SCC25-JQ1	18.9	18.87	18.89	17.79	18.01	17.92	1.11	0.86	0.97		0.136667	-0.113333	-0.00333333	0.909618	1.08172	1.00231	0.997885	0.0861385	0.0497336
ORF1
NAME	CT1	CT2	CT3	RefCT1	RefCT2	RefCT3	△CT1	△CT2	△CT3	Average	△△CT1	△△CT2	△△CT3	2-△△CT1	2-△△CT2	2-△△CT3	Average	SD	SE
SCC25-DMSO	17.4985	17.7049	17.4685	19.2945	19.1512	19.1383	-1.79599	-1.44634	-1.6698	-1.63738	-0.158613	0.191035	-0.0324226	1.11621	0.875977	1.02273	1.00497	0.121098	0.0699182
SCC25-JQ1	16.7594	16.6983	16.7648	18.6021	18.6098934329787	18.7536929324415	-1.84272	-1.91157	-1.98891		-0.205339	-0.274192	-0.351526	1.15296	1.20932	1.27591	1.21273	0.0615471	0.0355353
ORF2
NAME	CT1	CT2	CT3	RefCT1	RefCT2	RefCT3	△CT1	△CT2	△CT3	Average	△△CT1	△△CT2	△△CT3	2-△△CT1	2-△△CT2	2-△△CT3	Average	SD	SE
SCC25-DMSO	17.27	17.34	17.47	18.41	18.51	18.7	-1.14	-1.17	-1.23	-1.18	0.04	0.01	-0.05	0.972655	0.993092	1.03526	1.00034	0.0319276	0.0184339
SCC25-JQ1	17.32	17.2	17.46	18.36	18.64	18.41	-1.04	-1.44	-0.95		0.14	-0.26	0.23	0.907519	1.19748	0.852635	0.985878	0.185295	0.106983

## Sheet: Fig 3E-25
IL1B																				IL1B
NAME	CT1	CT2	CT3	RefCT1	RefCT2	RefCT3	△CT1	△CT2	△CT3	Average	△△CT1	△△CT2	△△CT3	2-△△CT1	2-△△CT2	2-△△CT3	Average	SD	SE		15-0	15-0.1	15-0.5	15-1
15-0	19.6154	19.542	19.5744	15.5266	15.5267	15.5428	4.08879	4.01524	4.03163	4.04522	0.0435702	-0.02998	-0.0135902	0.970251	1.021	1.00946	1.00024	0.026602	0.0153591		0.970251	0.353111	0.0581118	0.042575
15-0.1	20.9567	20.9766	20.9307	15.4096	15.3579	15.3609	5.54703	5.61865	5.5698		1.50181	1.57343	1.52458	0.353111	0.336009	0.34758	0.345567	0.00872713	0.00503876		1.021	0.336009	0.0535487	0.0378867
15-0.5	22.867	22.919	22.9163	14.7167	14.6507	14.6552	8.15025	8.26823	8.26109		4.10502	4.223	4.21587	0.0581118	0.0535487	0.0538143	0.0551583	0.00256132	0.00147882		1.00946	0.34758	0.0538143	0.0408481
15-1	23.4803	23.5311	23.4372	14.8812	14.7637	14.7784	8.59907	8.76739	8.65881		4.55385	4.72216	4.61359	0.042575	0.0378867	0.0408481	0.0404366	0.00237108	0.00136898
IL1A																				IL1A
NAME	CT1	CT2	CT3	RefCT1	RefCT2	RefCT3	△CT1	△CT2	△CT3	Average	△△CT1	△△CT2	△△CT3	2-△△CT1	2-△△CT2	2-△△CT3	Average	SD	SE
15-0	19.778	19.8049	19.6973	15.5266	15.5267	15.5428	4.25138	4.27823	4.15451	4.22804	0.0233396	0.0501884	-0.073528	0.983952	0.96581	1.05229	1.00068	0.0456014	0.0263288		0.983952	0.213827	0.0177481	0.0108039
15-0.1	21.8632	21.9365	21.952	15.4096	15.3579	15.3609	6.45352	6.57862	6.59112		2.22549	2.35058	2.36308	0.213827	0.196067	0.194376	0.201423	0.0107752	0.00622122		0.96581	0.196067	0.0158844	0.00951811
15-0.5	24.761	24.855	24.8295	14.7167	14.6507	14.6552	10.0442	10.2043	10.1743		5.81619	5.97624	5.94625	0.0177481	0.0158844	0.0162181	0.0166169	0.000993765	0.000573767		1.05229	0.194376	0.0162181	0.00992204
15-1	25.6415	25.7068	25.6616	14.8812	14.7637	14.7784	10.7603	10.9431	10.8832		6.5323	6.71511	6.65515	0.0108039	0.00951811	0.00992204	0.0100814	0.000657555	0.000379651
CXCL1																				CXCL1
NAME	CT1	CT2	CT3	RefCT1	RefCT2	RefCT3	△CT1	△CT2	△CT3	Average	△△CT1	△△CT2	△△CT3	2-△△CT1	2-△△CT2	2-△△CT3	Average	SD	SE
15-0	19.6125	19.586	19.5863	15.6349	15.8107	15.7602	3.97764	3.77533	3.8261	3.85969	0.117947	-0.0843585	-0.0335887	0.921498	1.06022	1.02356	1.00176	0.0718824	0.0415026		0.921498	0.358044	0.0969848	0.11347
15-0.1	20.9322	20.9359	20.9079	15.5907	15.6423	15.6777	5.34148	5.29365	5.23022		1.48179	1.43396	1.37054	0.358044	0.370114	0.386748	0.371635	0.014412	0.00832099		1.06022	0.370114	0.107013	0.113739
15-0.5	21.9316	21.881	21.8484	14.7058	14.7971	14.8194	7.22579	7.08382	7.02901		3.3661	3.22414	3.16932	0.0969848	0.107013	0.111158	0.105052	0.0072872	0.00420739		1.02356	0.386748	0.111158	0.117174
15-1	21.899	21.8386	21.8685	14.8997	14.8427	14.9156	6.99931	6.99589	6.95296		3.13962	3.1362	3.09327	0.11347	0.113739	0.117174	0.114794	0.00206524	0.0011924
IL6																				IL6
NAME	CT1	CT2	CT3	RefCT1	RefCT2	RefCT3	△CT1	△CT2	△CT3	Average	△△CT1	△△CT2	△△CT3	2-△△CT1	2-△△CT2	2-△△CT3	Average	SD	SE
15-0	23.9289	23.9123	23.9044	15.6349	15.8107	15.7602	8.29399	8.10165	8.1442	8.17995	0.114045	-0.0783008	-0.035744	0.923994	1.05577	1.02509	1.00162	0.0689532	0.0398113		0.923994	3.29954	3.63652	3.08032
15-0.1	22.0484	20.844	22.1006	15.5907	15.6423	15.6777	6.45768	5.20174	6.42286		-1.72226	-2.97821	-1.75708	3.29954	7.88007	3.38014	3.33984	0.0569937	0.0329063		1.05577		3.84776	3.4318
15-0.5	21.0232	21.0331	21.0409	14.7058	14.7971	14.8194	6.31739	6.23593	6.22146		-1.86256	-1.94402	-1.95848	3.63652	3.84776	3.88653	3.79027	0.134554	0.0776872		1.02509	3.38014	3.88653	3.55904
15-1	21.4566	21.2437	21.264	14.8997	14.8427	14.9156	6.55687	6.40098	6.34846		-1.62308	-1.77896	-1.83149	3.08032	3.4318	3.55904	3.35705	0.247958	0.143163
IL8																				IL8
NAME	CT1	CT2	CT3	RefCT1	RefCT2	RefCT3	△CT1	△CT2	△CT3	Average	△△CT1	△△CT2	△△CT3	2-△△CT1	2-△△CT2	2-△△CT3	Average	SD	SE
15-0	17.9152	17.7884	17.8137	15.6349	15.8107	15.7602	2.28027	1.97771	2.05348	2.10382	0.176453	-0.126115	-0.0503378	0.884876	1.09135	1.03551	1.00391	0.106802	0.061664		0.884876	0.428085	0.156864	0.142793
15-0.1	18.9185	18.9192	18.9268	15.5907	15.6423	15.6777	3.32785	3.27692	3.24907		1.22403	1.1731	1.14525	0.428085	0.443467	0.452112	0.441221	0.0121702	0.00702665		1.09135	0.443467	0.166365	0.141597
15-0.5	19.482	19.4885	19.5284	14.7058	14.7971	14.8194	4.77623	4.6914	4.70893		2.67241	2.58757	2.60511	0.156864	0.166365	0.164355	0.162528	0.00500696	0.00289085		1.03551	0.452112	0.164355	0.14273
15-1	19.8116	19.7667	19.828	14.8997	14.8427	14.9156	4.91183	4.92396	4.91246		2.80801	2.82014	2.80864	0.142793	0.141597	0.14273	0.142373	0.000673095	0.000388623
CCL2																				CCL2
NAME	CT1	CT2	CT3	RefCT1	RefCT2	RefCT3	△CT1	△CT2	△CT3	Average	△△CT1	△△CT2	△△CT3	2-△△CT1	2-△△CT2	2-△△CT3	Average	SD	SE
15-0	23.9615	23.9223	23.9325	15.6349	15.8107	15.7602	8.32658	8.11159	8.17228	8.20348	0.1231	-0.0918932	-0.0312071	0.918212	1.06577	1.02187	1.00195	0.0757674	0.0437456		0.918212	2.57682	2.75554	2.75946
15-0.1	22.4286	22.4203	22.4057	15.5907	15.6423	15.6777	6.83789	6.778	6.72799		-1.36559	-1.42548	-1.47549	2.57682	2.68604	2.78079	2.68122	0.102067	0.0589303		1.06577	2.68604	3.05344	2.9624
15-0.5	21.4469	21.3902	21.3704	14.7058	14.7971	14.8194	6.74115	6.59305	6.55095		-1.46234	-1.61044	-1.65253	2.75554	3.05344	3.14385	2.98428	0.203183	0.117311		1.02187	2.78079	3.14385	3.14918
15-1	21.6388	21.4795	21.4641	14.8997	14.8427	14.9156	6.7391	6.63672	6.54851		-1.46439	-1.56677	-1.65497	2.75946	2.9624	3.14918	2.95701	0.194915	0.112538
MMP3																				MMP3
NAME	CT1	CT2	CT3	RefCT1	RefCT2	RefCT3	△CT1	△CT2	△CT3	Average	△△CT1	△△CT2	△△CT3	2-△△CT1	2-△△CT2	2-△△CT3	Average	SD	SE
15-0	29.4346	29.3491	29.2138	15.6349	15.8107	15.7602	13.7997	13.5384	13.4536	13.5972	0.202435	-0.0588217	-0.143613	0.869083	1.04161	1.10467	1.00512	0.121959	0.0704149		0.869083	0.171088	0.0404139	0.115682
15-0.1	31.7351	31.6011	31.0633	15.5907	15.6423	15.6777	16.1444	15.9588	15.3856		2.54719	2.36154	1.78837	0.171088	0.194583	0.289499	0.21839	0.0626929	0.0361969		1.04161	0.194583	0.115771	0.11007
15-0.5	32.932	31.505	32.5324	14.7058	14.7971	14.8194	18.2262	16.7079	17.7129		4.62901	3.11066	4.11569	0.0404139	0.115771	0.0576836	0.0712894	0.0394778	0.0227932		1.10467	0.289499	0.0576836	0.209124
15-1	31.6087	31.6235	30.7704	14.8997	14.8427	14.9156	16.709	16.7807	15.8548		3.11176	3.18351	2.25757	0.115682	0.11007	0.209124	0.144959	0.0556394	0.0321244

## Sheet: Fig S2D
MKN45
IL1A
NAME	CT1	CT2	CT3	RefCT1	RefCT2	RefCT3	△CT1	△CT2	△CT3	Average	△△CT1	△△CT2	△△CT3	2-△△CT1	2-△△CT2	2-△△CT3	Average	SD	SE
MKN45-DMSO	24.34	24.37	24.37	14.34	14.3	14.33	10	10.07	10.04	10.0367	-0.0366667	0.0333333	0.00333333	1.02574	0.97716	0.997692	1.0002	0.0243873	0.0140804
MKN45-JQ1	26.05	26.04	25.97	15	15.01	15	11.05	11.03	10.97		1.01333	0.993333	0.933333	0.4954	0.502316	0.523647	0.507121	0.0147237	0.00850098
IL6
NAME	CT1	CT2	CT3	RefCT1	RefCT2	RefCT3	△CT1	△CT2	△CT3	Average	△△CT1	△△CT2	△△CT3	2-△△CT1	2-△△CT2	2-△△CT3	Average	SD	SE
MKN45-DMSO	22.22	22	22.12	15.62	15.5	15.31	6.6	6.5	6.81	6.63667	-0.0366667	-0.136667	0.173333	1.02574	1.09936	0.886791	1.00396	0.107946	0.0623242
MKN45-JQ1	28.28	28.2	28.38	17.14	17	17.02	11.14	11.2	11.36		4.50333	4.56333	4.72333	0.0440922	0.042296	0.037856	0.0414148	0.00321013	0.00185342
CXCL8
NAME	CT1	CT2	CT3	RefCT1	RefCT2	RefCT3	△CT1	△CT2	△CT3	Average	△△CT1	△△CT2	△△CT3	2-△△CT1	2-△△CT2	2-△△CT3	Average	SD	SE
MKN45-DMSO	18.19	18.32	18.34	15	15.05	15.4	3.19	3.27	2.94	3.13333	0.0566667	0.136667	-0.193333	0.961483	0.909618	1.1434	1.00483	0.122773	0.0708852
MKN45-JQ1	26.01	26.02	26.09	16.87	16.86	16.86	9.14	9.16	9.23		6.00667	6.02667	6.09667	0.015553	0.0153388	0.0146124	0.0151681	0.000493009	0.000284647
MDA-MB-231
IL1A
NAME	CT1	CT2	CT3	RefCT1	RefCT2	RefCT3	△CT1	△CT2	△CT3	Average	△△CT1	△△CT2	△△CT3	2-△△CT1	2-△△CT2	2-△△CT3	Average	SD	SE
MDA-MB-231-DMSO	24.15	24.32	24.08	12.06	12.09	12.09	12.09	12.23	11.99	12.1033	-0.0133333	0.126667	-0.113333	1.00928	0.915945	1.08172	1.00232	0.083109	0.0479844
MDA-MB-231-JQ1	26.05	26.01	26.01	11.28	11.05	11.04	14.77	14.96	14.97		2.66667	2.85667	2.86667	0.15749	0.138057	0.137103	0.144217	0.011505	0.00664263
IL6
NAME	CT1	CT2	CT3	RefCT1	RefCT2	RefCT3	△CT1	△CT2	△CT3	Average	△△CT1	△△CT2	△△CT3	2-△△CT1	2-△△CT2	2-△△CT3	Average	SD	SE
MDA-MB-231-DMSO	24	24.02	24	12.06	12.09	12.09	11.94	11.93	11.91	11.9267	0.0133333	0.00333333	-0.0166667	0.990801	0.997692	1.01162	1.00004	0.0106057	0.00612339
MDA-MB-231-JQ1	26.2	26.06	26.31	11.28	11.05	11.04	14.92	15.01	15.27		2.99333	3.08333	3.34333	0.125579	0.117984	0.0985273	0.11403	0.0139526	0.00805577
CXCL8
NAME	CT1	CT2	CT3	RefCT1	RefCT2	RefCT3	△CT1	△CT2	△CT3	Average	△△CT1	△△CT2	△△CT3	2-△△CT1	2-△△CT2	2-△△CT3	Average	SD	SE
MDA-MB-231-DMSO	24.23	24.14	24	12.06	12.09	12.09	12.17	12.05	11.91	12.0433	0.126667	0.00666667	-0.133333	0.915945	0.99539	1.09682	1.00272	0.0906624	0.0523455
MDA-MB-231-JQ1	25.16	25.21	25.24	11.28	11.05	11.04	13.88	14.16	14.2		1.83667	2.11667	2.15667	0.279968	0.230579	0.224274	0.24494	0.0304982	0.0176087

## Sheet: Fig 5F
SCC15					SCC25
NAME	CT1	CT2	CT3		NAME	CT1	CT2	CT3
DMSO-Input	27.2855	27.3728	27.1425		DMSO-Input	26.4138	26.7677	27.0514
DMSO-IP	30.642	31.0521			DMSO-IP	28.9984	29.0441	29.097
DMSO-Input	27.8235	27.5986	27.6886		DMSO-Input	26.8541	26.8902	26.8194
DMSO-IgG	33.1661	32.8635			DMSO-IgG	31.6585	32.2261	31.6215
JQ1-Input	26.5476	26.8408	27.2304		JQ1-Input	26.1457	25.8764	26.0386
JQ1-IP	30.6394	30.3509	30.7868		JQ1-IP	25.7624	25.9742	25.8589
JQ1-Input	26.4952	26.5271	26.4653		JQ1-Input	25.7685	25.6513	26.0855
JQ1-IgG	30.9072	31.4768	31.4978		JQ1-IgG	27.1466	27.0102	27.0219
NAME	CT1	CT2	CT3		NAME	CT1	CT2	CT3
DMSO-Input	31.1648	31.7428			DMSO-Input	23.9328	23.4313
DMSO-IP	30.4381	31.4702			DMSO-IP	28.4228	27.4233
DMSO-Input	28.8051	28.5168	28.7026		DMSO-Input	25.7854	24.8745
DMSO-IgG	30.4166	30.3147			DMSO-IgG	32.5552	31.373
JQ1-Input	29.9261	29.5562	29.9767		JQ1-Input	24.2306	24.1823
JQ1-IP	31.1308	31.6821	31.6418		JQ1-IP	27.679	27.8411
JQ1-Input	31.0001	30.7541			JQ1-Input	25.157	24.495
JQ1-IgG	32.4442	33.2932			JQ1-IgG	31.0154	29.4613
NAME	CT1	CT2	CT3		NAME	CT1	CT2	CT3
DMSO-Input	30.4809	30.641	30.6352		DMSO-Input	27.3761	27.097	27.0946
DMSO-IP	31.0603	31.2841	31.6493		DMSO-IP	29.003	29.2592
DMSO-Input	31.0842	30.193	30.8033		DMSO-Input	27.0079	27.0426	26.8539
DMSO-IgG	33.3831	33.2219			DMSO-IgG	31.1385	31.2777
JQ1-Input	29.1377	28.8674	29.2843		JQ1-Input	26.2718	26.185	26.1577
JQ1-IP	32.3642	33.0585			JQ1-IP	25.7991	26.0967	26.01
JQ1-Input	27.5941	27.1444			JQ1-Input	25.5608	25.5042	25.6022
JQ1-IgG	31.2932	32.1334			JQ1-IgG	27.2151	26.9374	27.1387

## Sheet: Fig7D
5’UTR
NAME	CT1	CT2	CT3	RefCT1	RefCT2	RefCT3	△CT1	△CT2	△CT3	Average	△△CT1	△△CT2	△△CT3	2-△△CT1	2-△△CT2	2-△△CT3	Average	SD	SE
SCC15-DMSO	18.386	18.3251	18.3383	16.8883	16.8092	16.8904	1.49768	1.51589	1.44786	1.48714	0.0105394	0.0287434	-0.0392828	0.992721	0.980274	1.0276	1.0002	0.0245347	0.0141655
SCC15-JQ1	18.1386	18.2865	18.13	16.0245	16.003	16.0266	2.11403	2.28354	2.10337		0.626884	0.796393	0.61623	0.647573	0.575787	0.652373	0.625245	0.0428988	0.0247684
ORF1
NAME	CT1	CT2	CT3	RefCT1	RefCT2	RefCT3	△CT1	△CT2	△CT3	Average	△△CT1	△△CT2	△△CT3	2-△△CT1	2-△△CT2	2-△△CT3	Average	SD	SE
SCC15-DMSO	17.9054	17.7537	17.7543	16.8883	16.8092	16.8904	1.01711	0.944413	0.863889	0.941803	0.0753037	0.00261001	-0.0779137	0.949142	0.998193	1.05549	1.00094	0.0532274	0.0307317
SCC15-JQ1	17.2648	17.1746	17.0915	16.0245	16.003	16.0266	1.24024	1.17159	1.06485		0.298439	0.229788	0.123046	0.813132	0.85276	0.918247	0.861379	0.0530851	0.0306496
ORF2
NAME	CT1	CT2	CT3	RefCT1	RefCT2	RefCT3	△CT1	△CT2	△CT3	Average	△△CT1	△△CT2	△△CT3	2-△△CT1	2-△△CT2	2-△△CT3	Average	SD	SE
SCC15-DMSO	16.9954	17.0412	16.879	16.8883	16.8092	16.8904	0.107094	0.231922	-0.011393	0.109208	-0.00211339	0.122714	-0.120601	1.00147	0.918458	1.08719	1.00237	0.0843683	0.0487115
SCC15-JQ1	16.5363	16.2419	16.4303	16.0245	16.003	16.0266	0.511756	0.238898	0.403693		0.402548	0.129691	0.294485	0.756521	0.914027	0.815363	0.828637	0.0795878	0.0459514
5’UTR
NAME	CT1	CT2	CT3	RefCT1	RefCT2	RefCT3	△CT1	△CT2	△CT3	Average	△△CT1	△△CT2	△△CT3	2-△△CT1	2-△△CT2	2-△△CT3	Average	SD	SE
SCC25-DMSO	19.18	19.15	19.15	18.22	18.08	18.26	0.96	1.07	0.89	0.973333	-0.0133333	0.0966667	-0.0833333	1.00928	0.935191	1.05946	1.00131	0.0625183	0.036096
SCC25-JQ1	18.9	18.87	18.89	17.79	18.01	17.92	1.11	0.86	0.97		0.136667	-0.113333	-0.00333333	0.909618	1.08172	1.00231	0.997885	0.0861385	0.0497336
ORF1
NAME	CT1	CT2	CT3	RefCT1	RefCT2	RefCT3	△CT1	△CT2	△CT3	Average	△△CT1	△△CT2	△△CT3	2-△△CT1	2-△△CT2	2-△△CT3	Average	SD	SE
SCC25-DMSO	17.4985	17.7049	17.4685	19.2945	19.1512	19.1383	-1.79599	-1.44634	-1.6698	-1.63738	-0.158613	0.191035	-0.0324226	1.11621	0.875977	1.02273	1.00497	0.121098	0.0699182
SCC25-JQ1	16.7594	16.6983	16.7648	18.6021	18.6098934329787	18.7536929324415	-1.84272	-1.91157	-1.98891		-0.205339	-0.274192	-0.351526	1.15296	1.20932	1.27591	1.21273	0.0615471	0.0355353
ORF2
NAME	CT1	CT2	CT3	RefCT1	RefCT2	RefCT3	△CT1	△CT2	△CT3	Average	△△CT1	△△CT2	△△CT3	2-△△CT1	2-△△CT2	2-△△CT3	Average	SD	SE
SCC25-DMSO	17.27	17.34	17.47	18.41	18.51	18.7	-1.14	-1.17	-1.23	-1.18	0.04	0.01	-0.05	0.972655	0.993092	1.03526	1.00034	0.0319276	0.0184339
SCC25-JQ1	17.32	17.2	17.46	18.36	18.64	18.41	-1.04	-1.44	-0.95		0.14	-0.26	0.23	0.907519	1.19748	0.852635	0.985878	0.185295	0.106983
				16.8883	16.8092	16.8904
				16.0245	16.003	16.0266
