# Supplementary material
Source: Research Square preprint supplement (doi:10.21203/rs.3.rs-9262139/v1)
Supplement: Supplementary file 9 [file da314e48c82f8325f9194b2a.xlsx]

## Sheet: Sen_SCC15_358 genes_BP
Table S5, Related to Figure 6: GO analysis of promoter CpGI hypermethylated genes in senescent SCC15 (358 genes) , SCC25 (318 genes) cells, 43 common genes in both senescent cells. Biological Processes (BP) for each gene set are shown.
Annotation Cluster 1	Enrichment Score: 3.3411127620798524
Category	Term	Count	%	PValue	Genes	List Total	Pop Hits	Pop Total	Fold Enrichment	Bonferroni	Benjamini	FDR
GOTERM_BP_FAT	GO:0019219~regulation of nucleobase-containing compound metabolic process	102	29.8246	1.35949e-05	ENSG00000130675, ENSG00000213024, ENSG00000115318, ENSG00000090971, ENSG00000171700, ENSG00000164330, ENSG00000167840, ENSG00000125648, ENSG00000055332, ENSG00000142700, ENSG00000143355, ENSG00000125520, ENSG00000124795, ENSG00000112715, ENSG00000104413, ENSG00000006704, ENSG00000130844, ENSG00000178860, ENSG00000109705, ENSG00000112559, ENSG00000136147, ENSG00000117724, ENSG00000005339, ENSG0000…	282	4104	16650	1.46743	0.0573979	0.026434	0.026203
GOTERM_BP_FAT	GO:0034654~nucleobase-containing compound biosynthetic process	106	30.9942	2.11142e-05	ENSG00000130675, ENSG00000174371, ENSG00000213024, ENSG00000115318, ENSG00000090971, ENSG00000171700, ENSG00000164330, ENSG00000167840, ENSG00000055332, ENSG00000142700, ENSG00000143355, ENSG00000125520, ENSG00000124795, ENSG00000112715, ENSG00000006704, ENSG00000130844, ENSG00000178860, ENSG00000109705, ENSG00000112559, ENSG00000136147, ENSG00000117724, ENSG00000005339, ENSG00000177932, ENSG0000…	282	4357	16650	1.43643	0.0877173	0.026434	0.026203
GOTERM_BP_FAT	GO:0018130~heterocycle biosynthetic process	107	31.2865	2.12754e-05	ENSG00000130675, ENSG00000174371, ENSG00000213024, ENSG00000115318, ENSG00000090971, ENSG00000171700, ENSG00000164330, ENSG00000167840, ENSG00000055332, ENSG00000142700, ENSG00000143355, ENSG00000125520, ENSG00000124795, ENSG00000112715, ENSG00000006704, ENSG00000130844, ENSG00000178860, ENSG00000109705, ENSG00000112559, ENSG00000136147, ENSG00000117724, ENSG00000005339, ENSG00000177932, ENSG0000…	282	4411	16650	1.43223	0.0883568	0.026434	0.026203
GOTERM_BP_FAT	GO:0019438~aromatic compound biosynthetic process	107	31.2865	2.43183e-05	ENSG00000130675, ENSG00000174371, ENSG00000213024, ENSG00000115318, ENSG00000090971, ENSG00000171700, ENSG00000164330, ENSG00000167840, ENSG00000055332, ENSG00000142700, ENSG00000143355, ENSG00000125520, ENSG00000124795, ENSG00000112715, ENSG00000006704, ENSG00000130844, ENSG00000178860, ENSG00000109705, ENSG00000112559, ENSG00000136147, ENSG00000117724, ENSG00000005339, ENSG00000177932, ENSG0000…	282	4424	16650	1.42802	0.100339	0.026434	0.026203
GOTERM_BP_FAT	GO:0051171~regulation of nitrogen compound metabolic process	106	30.9942	3.41386e-05	ENSG00000130675, ENSG00000213024, ENSG00000115318, ENSG00000090971, ENSG00000171700, ENSG00000164330, ENSG00000167840, ENSG00000125648, ENSG00000186088, ENSG00000055332, ENSG00000142700, ENSG00000143355, ENSG00000125520, ENSG00000124795, ENSG00000112715, ENSG00000104413, ENSG00000006704, ENSG00000130844, ENSG00000178860, ENSG00000109705, ENSG00000112559, ENSG00000136147, ENSG00000117724, ENSG0000…	282	4404	16650	1.4211	0.137946	0.0296869	0.0294275
GOTERM_BP_FAT	GO:0010556~regulation of macromolecule biosynthetic process	98	28.655	0.000121896	ENSG00000130675, ENSG00000213024, ENSG00000115318, ENSG00000090971, ENSG00000171700, ENSG00000164330, ENSG00000167840, ENSG00000055332, ENSG00000142700, ENSG00000143355, ENSG00000125520, ENSG00000124795, ENSG00000112715, ENSG00000006704, ENSG00000130844, ENSG00000171791, ENSG00000178860, ENSG00000109705, ENSG00000112559, ENSG00000136147, ENSG00000117724, ENSG00000005339, ENSG00000177932, ENSG0000…	282	4107	16650	1.40886	0.411417	0.0757151	0.0750534
GOTERM_BP_FAT	GO:0010557~positive regulation of macromolecule biosynthetic process	47	13.7427	0.000220179	ENSG00000185507, ENSG00000213024, ENSG00000090971, ENSG00000120949, ENSG00000181085, ENSG00000136997, ENSG00000164330, ENSG00000166313, ENSG00000183072, ENSG00000120899, ENSG00000123388, ENSG00000128714, ENSG00000127586, ENSG00000101057, ENSG00000103241, ENSG00000112715, ENSG00000116819, ENSG00000130589, ENSG00000136108, ENSG00000115507, ENSG00000130700, ENSG00000180340, ENSG00000129194, ENSG0000…	282	1597	16650	1.73763	0.616127	0.100519	0.0996402
GOTERM_BP_FAT	GO:0034645~cellular macromolecule biosynthetic process	113	33.0409	0.000279824	ENSG00000130675, ENSG00000174371, ENSG00000213024, ENSG00000197771, ENSG00000115318, ENSG00000090971, ENSG00000171700, ENSG00000164330, ENSG00000100626, ENSG00000167840, ENSG00000125648, ENSG00000055332, ENSG00000142700, ENSG00000143355, ENSG00000125520, ENSG00000124795, ENSG00000112715, ENSG00000006704, ENSG00000130844, ENSG00000181991, ENSG00000171791, ENSG00000178860, ENSG00000109705, ENSG0000…	282	5012	16650	1.33117	0.703837	0.100519	0.0996402
GOTERM_BP_FAT	GO:0009891~positive regulation of biosynthetic process	50	14.6199	0.000297883	ENSG00000185507, ENSG00000213024, ENSG00000090971, ENSG00000120949, ENSG00000164330, ENSG00000166313, ENSG00000123388, ENSG00000128714, ENSG00000127586, ENSG00000103241, ENSG00000112715, ENSG00000136108, ENSG00000115507, ENSG00000180340, ENSG00000005339, ENSG00000064932, ENSG00000137273, ENSG00000144712, ENSG00000116670, ENSG00000102878, ENSG00000088881, ENSG00000067082, ENSG00000183765, ENSG0000…	282	1760	16650	1.67735	0.726208	0.100519	0.0996402
GOTERM_BP_FAT	GO:2000112~regulation of cellular macromolecule biosynthetic process	94	27.4854	0.000301937	ENSG00000103495, ENSG00000185507, ENSG00000130675, ENSG00000213024, ENSG00000103490, ENSG00000143390, ENSG00000115318, ENSG00000090971, ENSG00000196367, ENSG00000003402, ENSG00000171700, ENSG00000164330, ENSG00000166313, ENSG00000167840, ENSG00000188620, ENSG00000151725, ENSG00000182240, ENSG00000055332, ENSG00000123388, ENSG00000128714, ENSG00000133619, ENSG00000142700, ENSG00000127586, ENSG0000…	282	3991	16650	1.39063	0.730993	0.100519	0.0996402
GOTERM_BP_FAT	GO:1903508~positive regulation of nucleic acid-templated transcription	41	11.9883	0.000333366	ENSG00000185507, ENSG00000213024, ENSG00000090971, ENSG00000136997, ENSG00000164330, ENSG00000166313, ENSG00000183072, ENSG00000123388, ENSG00000128714, ENSG00000101057, ENSG00000103241, ENSG00000112715, ENSG00000116819, ENSG00000130589, ENSG00000136108, ENSG00000115507, ENSG00000130700, ENSG00000180340, ENSG00000129194, ENSG00000157168, ENSG00000170485, ENSG00000116017, ENSG00000005339, ENSG0000…	282	1349	16650	1.79447	0.765363	0.100519	0.0996402
GOTERM_BP_FAT	GO:0045893~positive regulation of transcription, DNA-templated	41	11.9883	0.000333366	ENSG00000185507, ENSG00000213024, ENSG00000090971, ENSG00000136997, ENSG00000164330, ENSG00000166313, ENSG00000183072, ENSG00000123388, ENSG00000128714, ENSG00000101057, ENSG00000103241, ENSG00000112715, ENSG00000116819, ENSG00000130589, ENSG00000136108, ENSG00000115507, ENSG00000130700, ENSG00000180340, ENSG00000129194, ENSG00000157168, ENSG00000170485, ENSG00000116017, ENSG00000005339, ENSG0000…	282	1349	16650	1.79447	0.765363	0.100519	0.0996402
GOTERM_BP_FAT	GO:0031328~positive regulation of cellular biosynthetic process	49	14.3275	0.000369894	ENSG00000185507, ENSG00000213024, ENSG00000090971, ENSG00000120949, ENSG00000164330, ENSG00000166313, ENSG00000123388, ENSG00000128714, ENSG00000127586, ENSG00000103241, ENSG00000112715, ENSG00000136108, ENSG00000115507, ENSG00000180340, ENSG00000005339, ENSG00000064932, ENSG00000137273, ENSG00000144712, ENSG00000116670, ENSG00000102878, ENSG00000088881, ENSG00000067082, ENSG00000183765, ENSG0000…	282	1729	16650	1.67327	0.799832	0.100519	0.0996402
GOTERM_BP_FAT	GO:1902680~positive regulation of RNA biosynthetic process	41	11.9883	0.000447922	ENSG00000185507, ENSG00000213024, ENSG00000090971, ENSG00000136997, ENSG00000164330, ENSG00000166313, ENSG00000183072, ENSG00000123388, ENSG00000128714, ENSG00000101057, ENSG00000103241, ENSG00000112715, ENSG00000116819, ENSG00000130589, ENSG00000136108, ENSG00000115507, ENSG00000130700, ENSG00000180340, ENSG00000129194, ENSG00000157168, ENSG00000170485, ENSG00000116017, ENSG00000005339, ENSG0000…	282	1369	16650	1.76826	0.857441	0.111661	0.110685
GOTERM_BP_FAT	GO:0045935~positive regulation of nucleobase-containing compound metabolic process	47	13.7427	0.000505517	ENSG00000185507, ENSG00000213024, ENSG00000090971, ENSG00000181085, ENSG00000136997, ENSG00000152402, ENSG00000164330, ENSG00000166313, ENSG00000183072, ENSG00000120899, ENSG00000123388, ENSG00000128714, ENSG00000127586, ENSG00000101057, ENSG00000103241, ENSG00000112715, ENSG00000116819, ENSG00000130589, ENSG00000136108, ENSG00000115507, ENSG00000130700, ENSG00000180340, ENSG00000129194, ENSG0000…	282	1658	16650	1.6737	0.889036	0.115684	0.114673
GOTERM_BP_FAT	GO:2001141~regulation of RNA biosynthetic process	86	25.1462	0.000610343	ENSG00000103495, ENSG00000185507, ENSG00000130675, ENSG00000213024, ENSG00000103490, ENSG00000143390, ENSG00000115318, ENSG00000090971, ENSG00000196367, ENSG00000003402, ENSG00000171700, ENSG00000164330, ENSG00000166313, ENSG00000167840, ENSG00000188620, ENSG00000151725, ENSG00000055332, ENSG00000123388, ENSG00000128714, ENSG00000133619, ENSG00000142700, ENSG00000143355, ENSG00000125520, ENSG0000…	282	3644	16650	1.39343	0.929672	0.123002	0.121927
GOTERM_BP_FAT	GO:0010468~regulation of gene expression	99	28.9474	0.000634691	ENSG00000130675, ENSG00000213024, ENSG00000115318, ENSG00000090971, ENSG00000171700, ENSG00000164330, ENSG00000167840, ENSG00000055332, ENSG00000142700, ENSG00000143355, ENSG00000125520, ENSG00000124795, ENSG00000112715, ENSG00000104413, ENSG00000006704, ENSG00000130844, ENSG00000171791, ENSG00000092621, ENSG00000178860, ENSG00000109705, ENSG00000112559, ENSG00000136147, ENSG00000117724, ENSG0000…	282	4345	16650	1.34527	0.936741	0.123002	0.121927
GOTERM_BP_FAT	GO:0051252~regulation of RNA metabolic process	88	25.731	0.000678131	ENSG00000103495, ENSG00000185507, ENSG00000130675, ENSG00000213024, ENSG00000103490, ENSG00000143390, ENSG00000115318, ENSG00000090971, ENSG00000196367, ENSG00000003402, ENSG00000171700, ENSG00000164330, ENSG00000166313, ENSG00000167840, ENSG00000188620, ENSG00000151725, ENSG00000055332, ENSG00000123388, ENSG00000128714, ENSG00000133619, ENSG00000142700, ENSG00000143355, ENSG00000125520, ENSG0000…	282	3762	16650	1.38111	0.947635	0.123002	0.121927
GOTERM_BP_FAT	GO:0006355~regulation of transcription, DNA-templated	85	24.8538	0.000678945	ENSG00000103495, ENSG00000185507, ENSG00000130675, ENSG00000213024, ENSG00000103490, ENSG00000143390, ENSG00000115318, ENSG00000090971, ENSG00000196367, ENSG00000003402, ENSG00000171700, ENSG00000164330, ENSG00000166313, ENSG00000167840, ENSG00000188620, ENSG00000151725, ENSG00000055332, ENSG00000123388, ENSG00000128714, ENSG00000133619, ENSG00000142700, ENSG00000143355, ENSG00000125520, ENSG0000…	282	3603	16650	1.3929	0.94782	0.123002	0.121927
GOTERM_BP_FAT	GO:0006357~regulation of transcription from RNA polymerase II promoter	50	14.6199	0.000766805	ENSG00000185507, ENSG00000130675, ENSG00000143390, ENSG00000164330, ENSG00000166313, ENSG00000123388, ENSG00000128714, ENSG00000124795, ENSG00000103241, ENSG00000112715, ENSG00000136108, ENSG00000115507, ENSG00000006704, ENSG00000178860, ENSG00000109705, ENSG00000112559, ENSG00000005339, ENSG00000064932, ENSG00000137273, ENSG00000116670, ENSG00000010030, ENSG00000102878, ENSG00000088881, ENSG0000…	282	1835	16650	1.60879	0.964398	0.124433	0.123346
GOTERM_BP_FAT	GO:1903506~regulation of nucleic acid-templated transcription	85	24.8538	0.000824791	ENSG00000103495, ENSG00000185507, ENSG00000130675, ENSG00000213024, ENSG00000103490, ENSG00000143390, ENSG00000115318, ENSG00000090971, ENSG00000196367, ENSG00000003402, ENSG00000171700, ENSG00000164330, ENSG00000166313, ENSG00000167840, ENSG00000188620, ENSG00000151725, ENSG00000055332, ENSG00000123388, ENSG00000128714, ENSG00000133619, ENSG00000142700, ENSG00000143355, ENSG00000125520, ENSG0000…	282	3625	16650	1.38445	0.972337	0.128078	0.126959
GOTERM_BP_FAT	GO:0051254~positive regulation of RNA metabolic process	41	11.9883	0.000854468	ENSG00000185507, ENSG00000213024, ENSG00000090971, ENSG00000136997, ENSG00000164330, ENSG00000166313, ENSG00000183072, ENSG00000123388, ENSG00000128714, ENSG00000101057, ENSG00000103241, ENSG00000112715, ENSG00000116819, ENSG00000130589, ENSG00000136108, ENSG00000115507, ENSG00000130700, ENSG00000180340, ENSG00000129194, ENSG00000157168, ENSG00000170485, ENSG00000116017, ENSG00000005339, ENSG0000…	282	1415	16650	1.71077	0.975689	0.128111	0.126992
GOTERM_BP_FAT	GO:0051173~positive regulation of nitrogen compound metabolic process	48	14.0351	0.00108212	ENSG00000185507, ENSG00000213024, ENSG00000090971, ENSG00000181085, ENSG00000136997, ENSG00000152402, ENSG00000164330, ENSG00000166313, ENSG00000183072, ENSG00000186088, ENSG00000120899, ENSG00000123388, ENSG00000128714, ENSG00000127586, ENSG00000101057, ENSG00000103241, ENSG00000112715, ENSG00000116819, ENSG00000130589, ENSG00000136108, ENSG00000115507, ENSG00000130700, ENSG00000180340, ENSG0000…	282	1767	16650	1.60387	0.990974	0.139771	0.13855
GOTERM_BP_FAT	GO:0006351~transcription, DNA-templated	84	24.5614	0.00109862	ENSG00000103495, ENSG00000185507, ENSG00000130675, ENSG00000160207, ENSG00000213024, ENSG00000103490, ENSG00000143390, ENSG00000115318, ENSG00000090971, ENSG00000196367, ENSG00000003402, ENSG00000164330, ENSG00000166313, ENSG00000167840, ENSG00000188620, ENSG00000151725, ENSG00000055332, ENSG00000123388, ENSG00000128714, ENSG00000143355, ENSG00000125520, ENSG00000124795, ENSG00000103241, ENSG0000…	282	3605	16650	1.37575	0.991599	0.139771	0.13855
GOTERM_BP_FAT	GO:0097659~nucleic acid-templated transcription	87	25.4386	0.00115725	ENSG00000103495, ENSG00000185507, ENSG00000130675, ENSG00000160207, ENSG00000213024, ENSG00000103490, ENSG00000143390, ENSG00000115318, ENSG00000090971, ENSG00000196367, ENSG00000003402, ENSG00000171700, ENSG00000164330, ENSG00000166313, ENSG00000167840, ENSG00000188620, ENSG00000151725, ENSG00000055332, ENSG00000123388, ENSG00000128714, ENSG00000133619, ENSG00000142700, ENSG00000143355, ENSG0000…	282	3771	16650	1.36216	0.993492	0.139771	0.13855
GOTERM_BP_FAT	GO:0031325~positive regulation of cellular metabolic process	69	20.1754	0.00131488	ENSG00000185507, ENSG00000134758, ENSG00000213024, ENSG00000103490, ENSG00000090971, ENSG00000120949, ENSG00000133265, ENSG00000164330, ENSG00000166313, ENSG00000186088, ENSG00000184661, ENSG00000204435, ENSG00000055332, ENSG00000123388, ENSG00000128714, ENSG00000100300, ENSG00000127586, ENSG00000103241, ENSG00000112715, ENSG00000136108, ENSG00000115507, ENSG00000171791, ENSG00000180340, ENSG0000…	282	2839	16650	1.43499	0.996723	0.146592	0.145311
GOTERM_BP_FAT	GO:0009893~positive regulation of metabolic process	73	21.345	0.0013814	ENSG00000185507, ENSG00000134758, ENSG00000213024, ENSG00000103490, ENSG00000090971, ENSG00000120949, ENSG00000133265, ENSG00000164330, ENSG00000166313, ENSG00000186088, ENSG00000184661, ENSG00000204435, ENSG00000055332, ENSG00000123388, ENSG00000128714, ENSG00000100300, ENSG00000127586, ENSG00000124795, ENSG00000103241, ENSG00000112715, ENSG00000128165, ENSG00000136108, ENSG00000115507, ENSG0000…	282	3052	16650	1.41222	0.997547	0.150159	0.148846
GOTERM_BP_FAT	GO:0032774~RNA biosynthetic process	89	26.0234	0.0014428	ENSG00000103495, ENSG00000185507, ENSG00000130675, ENSG00000160207, ENSG00000213024, ENSG00000103490, ENSG00000143390, ENSG00000115318, ENSG00000090971, ENSG00000196367, ENSG00000003402, ENSG00000171700, ENSG00000164330, ENSG00000166313, ENSG00000167840, ENSG00000188620, ENSG00000151725, ENSG00000055332, ENSG00000123388, ENSG00000128714, ENSG00000133619, ENSG00000142700, ENSG00000143355, ENSG0000…	282	3905	16650	1.34566	0.998123	0.151185	0.149864
GOTERM_BP_FAT	GO:0010604~positive regulation of macromolecule metabolic process	69	20.1754	0.00153908	ENSG00000185507, ENSG00000134758, ENSG00000213024, ENSG00000103490, ENSG00000090971, ENSG00000120949, ENSG00000133265, ENSG00000164330, ENSG00000166313, ENSG00000186088, ENSG00000184661, ENSG00000204435, ENSG00000055332, ENSG00000123388, ENSG00000128714, ENSG00000127586, ENSG00000124795, ENSG00000103241, ENSG00000112715, ENSG00000128165, ENSG00000136108, ENSG00000115507, ENSG00000171791, ENSG0000…	282	2856	16650	1.42645	0.998765	0.152089	0.15076
GOTERM_BP_FAT	GO:0016070~RNA metabolic process	102	29.8246	0.00189536	ENSG00000130675, ENSG00000174371, ENSG00000213024, ENSG00000115318, ENSG00000090971, ENSG00000171700, ENSG00000164330, ENSG00000167840, ENSG00000055332, ENSG00000142700, ENSG00000143355, ENSG00000125520, ENSG00000124795, ENSG00000112715, ENSG00000104413, ENSG00000006704, ENSG00000130844, ENSG00000181991, ENSG00000178860, ENSG00000109705, ENSG00000112559, ENSG00000136147, ENSG00000117724, ENSG0000…	282	4648	16650	1.29568	0.999738	0.175341	0.173809
GOTERM_BP_FAT	GO:0006366~transcription from RNA polymerase II promoter	48	14.0351	0.00198622	ENSG00000185507, ENSG00000103495, ENSG00000158747, ENSG00000160207, ENSG00000143390, ENSG00000136997, ENSG00000164330, ENSG00000166313, ENSG00000183072, ENSG00000123388, ENSG00000128714, ENSG00000101057, ENSG00000092607, ENSG00000124795, ENSG00000103241, ENSG00000112715, ENSG00000178764, ENSG00000116819, ENSG00000130589, ENSG00000136108, ENSG00000132326, ENSG00000115507, ENSG00000130700, ENSG0000…	282	1820	16650	1.55717	0.999824	0.179918	0.178346
GOTERM_BP_FAT	GO:0010628~positive regulation of gene expression	45	13.1579	0.00245455	ENSG00000185507, ENSG00000213024, ENSG00000090971, ENSG00000136997, ENSG00000164330, ENSG00000166313, ENSG00000183072, ENSG00000120899, ENSG00000123388, ENSG00000128714, ENSG00000160710, ENSG00000101057, ENSG00000124795, ENSG00000103241, ENSG00000112715, ENSG00000116819, ENSG00000128165, ENSG00000130589, ENSG00000136108, ENSG00000115507, ENSG00000130700, ENSG00000180340, ENSG00000129194, ENSG0000…	282	1692	16650	1.57028	0.999977	0.213448	0.211582
GOTERM_BP_FAT	GO:0045944~positive regulation of transcription from RNA polymerase II promoter	31	9.06433	0.00288668	ENSG00000185507, ENSG00000136997, ENSG00000164330, ENSG00000166313, ENSG00000183072, ENSG00000123388, ENSG00000128714, ENSG00000101057, ENSG00000103241, ENSG00000112715, ENSG00000116819, ENSG00000130589, ENSG00000136108, ENSG00000115507, ENSG00000130700, ENSG00000129194, ENSG00000157168, ENSG00000170485, ENSG00000116017, ENSG00000005339, ENSG00000064932, ENSG00000123737, ENSG00000137273, ENSG0000…	282	1041	16650	1.75823	0.999997	0.246104	0.243953
GOTERM_BP_FAT	GO:0010467~gene expression	111	32.4561	0.00555092	ENSG00000130675, ENSG00000213024, ENSG00000115318, ENSG00000090971, ENSG00000171700, ENSG00000164330, ENSG00000167840, ENSG00000125648, ENSG00000055332, ENSG00000142700, ENSG00000143355, ENSG00000125520, ENSG00000124795, ENSG00000244617, ENSG00000112715, ENSG00000104413, ENSG00000006704, ENSG00000130844, ENSG00000181991, ENSG00000178860, ENSG00000109705, ENSG00000112559, ENSG00000136147, ENSG0000…	282	5306	16650	1.23515	1	0.378264	0.374958
Annotation Cluster 2	Enrichment Score: 2.4609167639549296
Category	Term	Count	%	PValue	Genes	List Total	Pop Hits	Pop Total	Fold Enrichment	Bonferroni	Benjamini	FDR
GOTERM_BP_FAT	GO:0007389~pattern specification process	19	5.55556	0.000462258	ENSG00000158747, ENSG00000103241, ENSG00000112715, ENSG00000115507, ENSG00000109705, ENSG00000112559, ENSG00000177508, ENSG00000171700, ENSG00000164066, ENSG00000005073, ENSG00000183072, ENSG00000120697, ENSG00000169126, ENSG00000187553, ENSG00000102977, ENSG00000128714, ENSG00000123388, ENSG00000142700, ENSG00000166823	282	436	16650	2.57296	0.86606	0.111661	0.110685
GOTERM_BP_FAT	GO:0003002~regionalization	15	4.38596	0.00146039	ENSG00000158747, ENSG00000103241, ENSG00000115507, ENSG00000112559, ENSG00000177508, ENSG00000171700, ENSG00000164066, ENSG00000005073, ENSG00000183072, ENSG00000187553, ENSG00000102977, ENSG00000128714, ENSG00000123388, ENSG00000142700, ENSG00000166823	282	329	16650	2.69191	0.998261	0.151185	0.149864
GOTERM_BP_FAT	GO:0048598~embryonic morphogenesis	21	6.14035	0.0017229	ENSG00000103241, ENSG00000115507, ENSG00000180340, ENSG00000109705, ENSG00000112559, ENSG00000177508, ENSG00000005339, ENSG00000159842, ENSG00000164066, ENSG00000137273, ENSG00000175707, ENSG00000005073, ENSG00000183072, ENSG00000166147, ENSG00000188620, ENSG00000102977, ENSG00000128714, ENSG00000123388, ENSG00000092607, ENSG00000162367, ENSG00000166823	282	571	16650	2.17144	0.999446	0.166471	0.165016
GOTERM_BP_FAT	GO:0009952~anterior/posterior pattern specification	7	2.04678	0.123231	ENSG00000103241, ENSG00000005073, ENSG00000115507, ENSG00000187553, ENSG00000128714, ENSG00000123388, ENSG00000171700	282	200	16650	2.06649	1	1	0.991488
Annotation Cluster 3	Enrichment Score: 2.2440343717793576
Category	Term	Count	%	PValue	Genes	List Total	Pop Hits	Pop Total	Fold Enrichment	Bonferroni	Benjamini	FDR
GOTERM_BP_FAT	GO:0007059~chromosome segregation	18	5.26316	5.57672e-05	ENSG00000104147, ENSG00000197771, ENSG00000237649, ENSG00000113810, ENSG00000117724, ENSG00000076242, ENSG00000100918, ENSG00000116670, ENSG00000134690, ENSG00000138160, ENSG00000151725, ENSG00000030066, ENSG00000136098, ENSG00000184661, ENSG00000179051, ENSG00000128789, ENSG00000161800, ENSG00000141696	282	334	16650	3.18193	0.215323	0.0404127	0.0400595
GOTERM_BP_FAT	GO:0007067~mitotic nuclear division	18	5.26316	0.00108549	ENSG00000163808, ENSG00000104147, ENSG00000213024, ENSG00000197771, ENSG00000237649, ENSG00000113810, ENSG00000117724, ENSG00000100918, ENSG00000116670, ENSG00000134690, ENSG00000138160, ENSG00000136098, ENSG00000184661, ENSG00000179051, ENSG00000128789, ENSG00000161800, ENSG00000183765, ENSG00000101057	282	431	16650	2.46581	0.991105	0.139771	0.13855
GOTERM_BP_FAT	GO:0098813~nuclear chromosome segregation	14	4.09357	0.00122965	ENSG00000197771, ENSG00000237649, ENSG00000113810, ENSG00000117724, ENSG00000076242, ENSG00000100918, ENSG00000116670, ENSG00000134690, ENSG00000151725, ENSG00000030066, ENSG00000179051, ENSG00000128789, ENSG00000161800, ENSG00000141696	282	287	16650	2.88012	0.995251	0.140698	0.139468
GOTERM_BP_FAT	GO:0000819~sister chromatid segregation	12	3.50877	0.00151986	ENSG00000116670, ENSG00000134690, ENSG00000151725, ENSG00000197771, ENSG00000030066, ENSG00000237649, ENSG00000179051, ENSG00000113810, ENSG00000117724, ENSG00000128789, ENSG00000100918, ENSG00000161800	282	224	16650	3.16299	0.998658	0.152089	0.15076
GOTERM_BP_FAT	GO:0051301~cell division	20	5.84795	0.00415846	ENSG00000112715, ENSG00000104147, ENSG00000136108, ENSG00000196230, ENSG00000197771, ENSG00000237649, ENSG00000113810, ENSG00000117724, ENSG00000136997, ENSG00000164066, ENSG00000175707, ENSG00000116670, ENSG00000134690, ENSG00000138160, ENSG00000136098, ENSG00000184661, ENSG00000179051, ENSG00000161800, ENSG00000183765, ENSG00000162367	282	575	16650	2.05365	1	0.324121	0.321289
GOTERM_BP_FAT	GO:0000280~nuclear division	20	5.84795	0.00476293	ENSG00000163808, ENSG00000104147, ENSG00000213024, ENSG00000197771, ENSG00000237649, ENSG00000113810, ENSG00000117724, ENSG00000076242, ENSG00000100918, ENSG00000116670, ENSG00000134690, ENSG00000138160, ENSG00000136098, ENSG00000184661, ENSG00000179051, ENSG00000128789, ENSG00000161800, ENSG00000183765, ENSG00000101057, ENSG00000141696	282	583	16650	2.02547	1	0.351004	0.347936
GOTERM_BP_FAT	GO:0048285~organelle fission	20	5.84795	0.00945593	ENSG00000163808, ENSG00000104147, ENSG00000213024, ENSG00000197771, ENSG00000237649, ENSG00000113810, ENSG00000117724, ENSG00000076242, ENSG00000100918, ENSG00000116670, ENSG00000134690, ENSG00000138160, ENSG00000136098, ENSG00000184661, ENSG00000179051, ENSG00000128789, ENSG00000161800, ENSG00000183765, ENSG00000101057, ENSG00000141696	282	622	16650	1.89847	1	0.527107	0.522501
GOTERM_BP_FAT	GO:0000070~mitotic sister chromatid segregation	8	2.33918	0.0104367	ENSG00000116670, ENSG00000134690, ENSG00000237649, ENSG00000113810, ENSG00000117724, ENSG00000128789, ENSG00000100918, ENSG00000161800	282	142	16650	3.32634	1	0.567237	0.562279
GOTERM_BP_FAT	GO:0000278~mitotic cell cycle	27	7.89474	0.013196	ENSG00000104147, ENSG00000154640, ENSG00000213024, ENSG00000197771, ENSG00000113810, ENSG00000100918, ENSG00000134690, ENSG00000136098, ENSG00000184661, ENSG00000161800, ENSG00000101057, ENSG00000180447, ENSG00000163808, ENSG00000136108, ENSG00000196230, ENSG00000171791, ENSG00000237649, ENSG00000117724, ENSG00000116017, ENSG00000116670, ENSG00000138160, ENSG00000030066, ENSG00000164362, ENSG0000…	282	968	16650	1.64685	1	0.659498	0.653734
GOTERM_BP_FAT	GO:0022402~cell cycle process	34	9.94152	0.0214071	ENSG00000104147, ENSG00000213024, ENSG00000197771, ENSG00000113810, ENSG00000076242, ENSG00000100918, ENSG00000136997, ENSG00000166313, ENSG00000134690, ENSG00000151725, ENSG00000136098, ENSG00000184661, ENSG00000161800, ENSG00000101057, ENSG00000180447, ENSG00000141696, ENSG00000163808, ENSG00000136108, ENSG00000196230, ENSG00000171791, ENSG00000092621, ENSG00000237649, ENSG00000129194, ENSG0000…	282	1357	16650	1.47933	1	0.81296	0.805855
GOTERM_BP_FAT	GO:0007062~sister chromatid cohesion	7	2.04678	0.0215019	ENSG00000134690, ENSG00000151725, ENSG00000197771, ENSG00000030066, ENSG00000179051, ENSG00000117724, ENSG00000100918	282	128	16650	3.22889	1	0.81296	0.805855
GOTERM_BP_FAT	GO:0051276~chromosome organization	30	8.77193	0.0281384	ENSG00000104147, ENSG00000197771, ENSG00000113810, ENSG00000181085, ENSG00000196367, ENSG00000076242, ENSG00000100918, ENSG00000136997, ENSG00000166313, ENSG00000134690, ENSG00000151725, ENSG00000161800, ENSG00000124795, ENSG00000141696, ENSG00000112715, ENSG00000132326, ENSG00000237649, ENSG00000129194, ENSG00000117724, ENSG00000005339, ENSG00000140350, ENSG00000116670, ENSG00000030066, ENSG0000…	282	1184	16650	1.49601	1	0.924946	0.916862
GOTERM_BP_FAT	GO:1903047~mitotic cell cycle process	24	7.01754	0.0284783	ENSG00000163808, ENSG00000104147, ENSG00000213024, ENSG00000136108, ENSG00000196230, ENSG00000197771, ENSG00000171791, ENSG00000237649, ENSG00000113810, ENSG00000117724, ENSG00000100918, ENSG00000116017, ENSG00000116670, ENSG00000134690, ENSG00000138160, ENSG00000030066, ENSG00000136098, ENSG00000184661, ENSG00000164362, ENSG00000179051, ENSG00000128789, ENSG00000161800, ENSG00000183765, ENSG0000…	282	890	16650	1.59216	1	0.924946	0.916862
GOTERM_BP_FAT	GO:0007049~cell cycle	39	11.4035	0.0356092	ENSG00000174371, ENSG00000104147, ENSG00000154640, ENSG00000213024, ENSG00000197771, ENSG00000113810, ENSG00000076242, ENSG00000100918, ENSG00000136997, ENSG00000166313, ENSG00000134690, ENSG00000151725, ENSG00000136098, ENSG00000184661, ENSG00000161800, ENSG00000127586, ENSG00000101057, ENSG00000180447, ENSG00000141696, ENSG00000163808, ENSG00000136108, ENSG00000196230, ENSG00000171791, ENSG0000…	282	1672	16650	1.37719	1	1	0.991488
Annotation Cluster 4	Enrichment Score: 2.237695017752054
Category	Term	Count	%	PValue	Genes	List Total	Pop Hits	Pop Total	Fold Enrichment	Bonferroni	Benjamini	FDR
GOTERM_BP_FAT	GO:0045595~regulation of cell differentiation	46	13.4503	0.000200143	ENSG00000185507, ENSG00000158747, ENSG00000213023, ENSG00000099864, ENSG00000177508, ENSG00000136997, ENSG00000003402, ENSG00000185070, ENSG00000112183, ENSG00000166313, ENSG00000183072, ENSG00000148803, ENSG00000120899, ENSG00000055332, ENSG00000100300, ENSG00000162878, ENSG00000142700, ENSG00000122378, ENSG00000124772, ENSG00000103241, ENSG00000112715, ENSG00000178764, ENSG00000213694, ENSG0000…	282	1544	16650	1.75904	0.581178	0.100519	0.0996402
GOTERM_BP_FAT	GO:2000026~regulation of multicellular organismal development	47	13.7427	0.00111302	ENSG00000185507, ENSG00000158747, ENSG00000213023, ENSG00000099864, ENSG00000177508, ENSG00000136997, ENSG00000185070, ENSG00000166313, ENSG00000183072, ENSG00000148803, ENSG00000120899, ENSG00000055332, ENSG00000123388, ENSG00000128714, ENSG00000100300, ENSG00000162878, ENSG00000142700, ENSG00000122378, ENSG00000124772, ENSG00000112715, ENSG00000178764, ENSG00000213694, ENSG00000128165, ENSG0000…	282	1721	16650	1.61243	0.992109	0.139771	0.13855
GOTERM_BP_FAT	GO:0060284~regulation of cell development	26	7.60234	0.00512006	ENSG00000158747, ENSG00000213023, ENSG00000099864, ENSG00000177508, ENSG00000136997, ENSG00000185070, ENSG00000166313, ENSG00000183072, ENSG00000148803, ENSG00000120899, ENSG00000100300, ENSG00000142700, ENSG00000124772, ENSG00000112715, ENSG00000178764, ENSG00000213694, ENSG00000132326, ENSG00000171791, ENSG00000157168, ENSG00000167191, ENSG00000005073, ENSG00000166147, ENSG00000116670, ENSG0000…	282	851	16650	1.80389	1	0.364951	0.361761
GOTERM_BP_FAT	GO:0051093~negative regulation of developmental process	23	6.72515	0.00744703	ENSG00000178764, ENSG00000213694, ENSG00000171791, ENSG00000109705, ENSG00000129194, ENSG00000157168, ENSG00000177508, ENSG00000136997, ENSG00000003402, ENSG00000159842, ENSG00000183072, ENSG00000166147, ENSG00000116670, ENSG00000148803, ENSG00000123999, ENSG00000120899, ENSG00000164362, ENSG00000179051, ENSG00000100300, ENSG00000069482, ENSG00000142611, ENSG00000169418, ENSG00000166823	282	739	16650	1.83759	1	0.437563	0.433739
GOTERM_BP_FAT	GO:0045596~negative regulation of cell differentiation	20	5.84795	0.0124166	ENSG00000178764, ENSG00000213694, ENSG00000171791, ENSG00000109705, ENSG00000157168, ENSG00000177508, ENSG00000136997, ENSG00000003402, ENSG00000183072, ENSG00000166147, ENSG00000116670, ENSG00000148803, ENSG00000123999, ENSG00000120899, ENSG00000164362, ENSG00000179051, ENSG00000100300, ENSG00000069482, ENSG00000142611, ENSG00000166823	282	640	16650	1.84508	1	0.63584	0.630283
GOTERM_BP_FAT	GO:0010721~negative regulation of cell development	12	3.50877	0.0151575	ENSG00000178764, ENSG00000213694, ENSG00000166147, ENSG00000116670, ENSG00000148803, ENSG00000171791, ENSG00000164362, ENSG00000179051, ENSG00000100300, ENSG00000177508, ENSG00000157168, ENSG00000069482	282	306	16650	2.31539	1	0.727378	0.721021
GOTERM_BP_FAT	GO:0051241~negative regulation of multicellular organismal process	23	6.72515	0.135646	ENSG00000178764, ENSG00000103490, ENSG00000171791, ENSG00000109705, ENSG00000129194, ENSG00000157168, ENSG00000177508, ENSG00000136997, ENSG00000159842, ENSG00000166147, ENSG00000116670, ENSG00000148803, ENSG00000185187, ENSG00000123999, ENSG00000120899, ENSG00000204435, ENSG00000164362, ENSG00000100300, ENSG00000069482, ENSG00000142611, ENSG00000169418, ENSG00000166823, ENSG00000107201	282	1017	16650	1.33528	1	1	0.991488
Annotation Cluster 5	Enrichment Score: 1.9260155189796238
Category	Term	Count	%	PValue	Genes	List Total	Pop Hits	Pop Total	Fold Enrichment	Bonferroni	Benjamini	FDR
GOTERM_BP_FAT	GO:0048565~digestive tract development	8	2.33918	0.00741414	ENSG00000137273, ENSG00000103241, ENSG00000130700, ENSG00000171791, ENSG00000109705, ENSG00000106538, ENSG00000128714, ENSG00000162878	282	133	16650	3.55143	1	0.437563	0.433739
GOTERM_BP_FAT	GO:0055123~digestive system development	8	2.33918	0.0116192	ENSG00000137273, ENSG00000103241, ENSG00000130700, ENSG00000171791, ENSG00000109705, ENSG00000106538, ENSG00000128714, ENSG00000162878	282	145	16650	3.25752	1	0.616103	0.610719
GOTERM_BP_FAT	GO:0048566~embryonic digestive tract development	4	1.16959	0.0193515	ENSG00000137273, ENSG00000103241, ENSG00000106538, ENSG00000162878	282	34	16650	6.94618	1	0.780491	0.77367
Annotation Cluster 6	Enrichment Score: 1.7637533706921191
Category	Term	Count	%	PValue	Genes	List Total	Pop Hits	Pop Total	Fold Enrichment	Bonferroni	Benjamini	FDR
GOTERM_BP_FAT	GO:0006357~regulation of transcription from RNA polymerase II promoter	50	14.6199	0.000766805	ENSG00000185507, ENSG00000130675, ENSG00000143390, ENSG00000164330, ENSG00000166313, ENSG00000123388, ENSG00000128714, ENSG00000124795, ENSG00000103241, ENSG00000112715, ENSG00000136108, ENSG00000115507, ENSG00000006704, ENSG00000178860, ENSG00000109705, ENSG00000112559, ENSG00000005339, ENSG00000064932, ENSG00000137273, ENSG00000116670, ENSG00000010030, ENSG00000102878, ENSG00000088881, ENSG0000…	282	1835	16650	1.60879	0.964398	0.124433	0.123346
GOTERM_BP_FAT	GO:0006366~transcription from RNA polymerase II promoter	48	14.0351	0.00198622	ENSG00000185507, ENSG00000103495, ENSG00000158747, ENSG00000160207, ENSG00000143390, ENSG00000136997, ENSG00000164330, ENSG00000166313, ENSG00000183072, ENSG00000123388, ENSG00000128714, ENSG00000101057, ENSG00000092607, ENSG00000124795, ENSG00000103241, ENSG00000112715, ENSG00000178764, ENSG00000116819, ENSG00000130589, ENSG00000136108, ENSG00000132326, ENSG00000115507, ENSG00000130700, ENSG0000…	282	1820	16650	1.55717	0.999824	0.179918	0.178346
GOTERM_BP_FAT	GO:0009890~negative regulation of biosynthetic process	40	11.6959	0.00459137	ENSG00000185507, ENSG00000214575, ENSG00000099864, ENSG00000143390, ENSG00000115318, ENSG00000136997, ENSG00000166313, ENSG00000183072, ENSG00000142089, ENSG00000182240, ENSG00000055332, ENSG00000100300, ENSG00000160710, ENSG00000092607, ENSG00000143355, ENSG00000103241, ENSG00000112715, ENSG00000178764, ENSG00000132326, ENSG00000109705, ENSG00000178860, ENSG00000112559, ENSG00000197587, ENSG0000…	282	1504	16650	1.57028	1	0.345907	0.342884
GOTERM_BP_FAT	GO:0010558~negative regulation of macromolecule biosynthetic process	38	11.1111	0.00521332	ENSG00000185507, ENSG00000214575, ENSG00000143390, ENSG00000115318, ENSG00000136997, ENSG00000166313, ENSG00000183072, ENSG00000142089, ENSG00000182240, ENSG00000055332, ENSG00000160710, ENSG00000092607, ENSG00000143355, ENSG00000103241, ENSG00000112715, ENSG00000178764, ENSG00000132326, ENSG00000109705, ENSG00000178860, ENSG00000112559, ENSG00000197587, ENSG00000129194, ENSG00000117724, ENSG0000…	282	1418	16650	1.58224	1	0.365605	0.36241
GOTERM_BP_FAT	GO:0031327~negative regulation of cellular biosynthetic process	39	11.4035	0.00603221	ENSG00000185507, ENSG00000214575, ENSG00000099864, ENSG00000143390, ENSG00000115318, ENSG00000136997, ENSG00000183072, ENSG00000142089, ENSG00000182240, ENSG00000055332, ENSG00000100300, ENSG00000160710, ENSG00000092607, ENSG00000143355, ENSG00000103241, ENSG00000112715, ENSG00000178764, ENSG00000132326, ENSG00000109705, ENSG00000178860, ENSG00000112559, ENSG00000197587, ENSG00000129194, ENSG0000…	282	1480	16650	1.55585	1	0.391463	0.388042
GOTERM_BP_FAT	GO:0051172~negative regulation of nitrogen compound metabolic process	39	11.4035	0.00794627	ENSG00000185507, ENSG00000214575, ENSG00000099864, ENSG00000143390, ENSG00000115318, ENSG00000076242, ENSG00000136997, ENSG00000183072, ENSG00000142089, ENSG00000055332, ENSG00000100300, ENSG00000160710, ENSG00000092607, ENSG00000143355, ENSG00000103241, ENSG00000112715, ENSG00000178764, ENSG00000132326, ENSG00000109705, ENSG00000178860, ENSG00000112559, ENSG00000197587, ENSG00000129194, ENSG0000…	282	1506	16650	1.52899	1	0.460672	0.456646
GOTERM_BP_FAT	GO:0045934~negative regulation of nucleobase-containing compound metabolic process	36	10.5263	0.00908382	ENSG00000185507, ENSG00000099864, ENSG00000143390, ENSG00000115318, ENSG00000076242, ENSG00000136997, ENSG00000183072, ENSG00000142089, ENSG00000100300, ENSG00000092607, ENSG00000143355, ENSG00000103241, ENSG00000112715, ENSG00000178764, ENSG00000132326, ENSG00000109705, ENSG00000178860, ENSG00000112559, ENSG00000197587, ENSG00000129194, ENSG00000117724, ENSG00000157168, ENSG00000005339, ENSG0000…	282	1371	16650	1.55035	1	0.512941	0.508458
GOTERM_BP_FAT	GO:2000113~negative regulation of cellular macromolecule biosynthetic process	34	9.94152	0.0155641	ENSG00000185507, ENSG00000214575, ENSG00000143390, ENSG00000115318, ENSG00000136997, ENSG00000183072, ENSG00000182240, ENSG00000055332, ENSG00000160710, ENSG00000092607, ENSG00000143355, ENSG00000103241, ENSG00000112715, ENSG00000178764, ENSG00000132326, ENSG00000109705, ENSG00000178860, ENSG00000112559, ENSG00000197587, ENSG00000129194, ENSG00000117724, ENSG00000157168, ENSG00000005339, ENSG0000…	282	1324	16650	1.5162	1	0.727378	0.721021
GOTERM_BP_FAT	GO:0010629~negative regulation of gene expression	36	10.5263	0.027273	ENSG00000185507, ENSG00000214575, ENSG00000213024, ENSG00000143390, ENSG00000115318, ENSG00000136997, ENSG00000183072, ENSG00000142089, ENSG00000055332, ENSG00000160710, ENSG00000092607, ENSG00000180447, ENSG00000143355, ENSG00000103241, ENSG00000112715, ENSG00000178764, ENSG00000132326, ENSG00000109705, ENSG00000178860, ENSG00000112559, ENSG00000197587, ENSG00000129194, ENSG00000117724, ENSG0000…	282	1485	16650	1.43133	1	0.924946	0.916862
GOTERM_BP_FAT	GO:0000122~negative regulation of transcription from RNA polymerase II promoter	21	6.14035	0.0288489	ENSG00000185507, ENSG00000103241, ENSG00000112715, ENSG00000178764, ENSG00000132326, ENSG00000143390, ENSG00000109705, ENSG00000178860, ENSG00000112559, ENSG00000197587, ENSG00000129194, ENSG00000005339, ENSG00000136997, ENSG00000183072, ENSG00000116670, ENSG00000102878, ENSG00000010030, ENSG00000161298, ENSG00000142611, ENSG00000092607, ENSG00000162367	282	748	16650	1.65761	1	0.924946	0.916862
GOTERM_BP_FAT	GO:0045892~negative regulation of transcription, DNA-templated	28	8.18713	0.0429741	ENSG00000185507, ENSG00000143390, ENSG00000115318, ENSG00000136997, ENSG00000183072, ENSG00000092607, ENSG00000143355, ENSG00000103241, ENSG00000112715, ENSG00000178764, ENSG00000132326, ENSG00000109705, ENSG00000178860, ENSG00000112559, ENSG00000197587, ENSG00000129194, ENSG00000117724, ENSG00000157168, ENSG00000005339, ENSG00000064932, ENSG00000137273, ENSG00000116670, ENSG00000102878, ENSG0000…	282	1130	16650	1.463	1	1	0.991488
GOTERM_BP_FAT	GO:0051253~negative regulation of RNA metabolic process	30	8.77193	0.0468612	ENSG00000185507, ENSG00000143390, ENSG00000115318, ENSG00000136997, ENSG00000183072, ENSG00000142089, ENSG00000092607, ENSG00000143355, ENSG00000103241, ENSG00000112715, ENSG00000178764, ENSG00000132326, ENSG00000109705, ENSG00000178860, ENSG00000112559, ENSG00000197587, ENSG00000129194, ENSG00000117724, ENSG00000157168, ENSG00000005339, ENSG00000064932, ENSG00000137273, ENSG00000116670, ENSG0000…	282	1240	16650	1.42845	1	1	0.991488
GOTERM_BP_FAT	GO:1902679~negative regulation of RNA biosynthetic process	29	8.47953	0.0483719	ENSG00000185507, ENSG00000143390, ENSG00000115318, ENSG00000136997, ENSG00000183072, ENSG00000142089, ENSG00000092607, ENSG00000143355, ENSG00000103241, ENSG00000112715, ENSG00000178764, ENSG00000132326, ENSG00000109705, ENSG00000178860, ENSG00000112559, ENSG00000197587, ENSG00000129194, ENSG00000117724, ENSG00000157168, ENSG00000005339, ENSG00000064932, ENSG00000137273, ENSG00000116670, ENSG0000…	282	1194	16650	1.43403	1	1	0.991488
GOTERM_BP_FAT	GO:1903507~negative regulation of nucleic acid-templated transcription	28	8.18713	0.0642088	ENSG00000185507, ENSG00000143390, ENSG00000115318, ENSG00000136997, ENSG00000183072, ENSG00000092607, ENSG00000143355, ENSG00000103241, ENSG00000112715, ENSG00000178764, ENSG00000132326, ENSG00000109705, ENSG00000178860, ENSG00000112559, ENSG00000197587, ENSG00000129194, ENSG00000117724, ENSG00000157168, ENSG00000005339, ENSG00000064932, ENSG00000137273, ENSG00000116670, ENSG00000102878, ENSG0000…	282	1177	16650	1.40458	1	1	0.991488
GOTERM_BP_FAT	GO:0010605~negative regulation of macromolecule metabolic process	49	14.3275	0.0789317	ENSG00000185507, ENSG00000213024, ENSG00000103490, ENSG00000143390, ENSG00000115318, ENSG00000185070, ENSG00000166313, ENSG00000182240, ENSG00000055332, ENSG00000100300, ENSG00000180447, ENSG00000143355, ENSG00000103241, ENSG00000112715, ENSG00000178860, ENSG00000109705, ENSG00000112559, ENSG00000117724, ENSG00000005339, ENSG00000064932, ENSG00000137273, ENSG00000116670, ENSG00000185187, ENSG0000…	282	2326	16650	1.2438	1	1	0.991488
GOTERM_BP_FAT	GO:0031324~negative regulation of cellular metabolic process	49	14.3275	0.0876936	ENSG00000185507, ENSG00000213024, ENSG00000103490, ENSG00000099864, ENSG00000143390, ENSG00000115318, ENSG00000185070, ENSG00000182240, ENSG00000055332, ENSG00000100300, ENSG00000180447, ENSG00000143355, ENSG00000103241, ENSG00000112715, ENSG00000171791, ENSG00000178860, ENSG00000109705, ENSG00000112559, ENSG00000117724, ENSG00000005339, ENSG00000064932, ENSG00000137273, ENSG00000116670, ENSG0000…	282	2345	16650	1.23372	1	1	0.991488
GOTERM_BP_FAT	GO:0009892~negative regulation of metabolic process	51	14.9123	0.12334	ENSG00000185507, ENSG00000213024, ENSG00000103490, ENSG00000099864, ENSG00000143390, ENSG00000115318, ENSG00000185070, ENSG00000166313, ENSG00000182240, ENSG00000055332, ENSG00000100300, ENSG00000180447, ENSG00000143355, ENSG00000103241, ENSG00000112715, ENSG00000171791, ENSG00000178860, ENSG00000109705, ENSG00000112559, ENSG00000117724, ENSG00000005339, ENSG00000064932, ENSG00000137273, ENSG0000…	282	2522	16650	1.19396	1	1	0.991488
Annotation Cluster 7	Enrichment Score: 1.7407131974646624
Category	Term	Count	%	PValue	Genes	List Total	Pop Hits	Pop Total	Fold Enrichment	Bonferroni	Benjamini	FDR
GOTERM_BP_FAT	GO:0051225~spindle assembly	7	2.04678	0.00417452	ENSG00000138160, ENSG00000196230, ENSG00000237649, ENSG00000076242, ENSG00000161800, ENSG00000183765, ENSG00000101057	282	90	16650	4.5922	1	0.324121	0.321289
GOTERM_BP_FAT	GO:0090307~mitotic spindle assembly	5	1.46199	0.00634433	ENSG00000138160, ENSG00000237649, ENSG00000161800, ENSG00000183765, ENSG00000101057	282	44	16650	6.70938	1	0.394073	0.390629
GOTERM_BP_FAT	GO:1902850~microtubule cytoskeleton organization involved in mitosis	5	1.46199	0.00687262	ENSG00000138160, ENSG00000237649, ENSG00000161800, ENSG00000183765, ENSG00000101057	282	45	16650	6.56028	1	0.420875	0.417197
GOTERM_BP_FAT	GO:0007051~spindle organization	7	2.04678	0.0108813	ENSG00000138160, ENSG00000196230, ENSG00000237649, ENSG00000076242, ENSG00000161800, ENSG00000183765, ENSG00000101057	282	110	16650	3.75725	1	0.584096	0.578992
GOTERM_BP_FAT	GO:0070925~organelle assembly	19	5.55556	0.028866	ENSG00000196230, ENSG00000181991, ENSG00000065882, ENSG00000107957, ENSG00000237649, ENSG00000117724, ENSG00000076242, ENSG00000135315, ENSG00000003402, ENSG00000174547, ENSG00000112144, ENSG00000164066, ENSG00000183072, ENSG00000169126, ENSG00000138160, ENSG00000169992, ENSG00000161800, ENSG00000183765, ENSG00000101057	282	653	16650	1.71793	1	0.924946	0.916862
GOTERM_BP_FAT	GO:0007017~microtubule-based process	16	4.67836	0.103226	ENSG00000163808, ENSG00000136108, ENSG00000196230, ENSG00000237649, ENSG00000044459, ENSG00000197457, ENSG00000076242, ENSG00000066735, ENSG00000112144, ENSG00000169126, ENSG00000138160, ENSG00000136098, ENSG00000166803, ENSG00000161800, ENSG00000183765, ENSG00000101057	282	618	16650	1.52861	1	1	0.991488
GOTERM_BP_FAT	GO:0000226~microtubule cytoskeleton organization	12	3.50877	0.110672	ENSG00000169126, ENSG00000136108, ENSG00000138160, ENSG00000196230, ENSG00000166803, ENSG00000237649, ENSG00000044459, ENSG00000197457, ENSG00000076242, ENSG00000161800, ENSG00000183765, ENSG00000101057	282	428	16650	1.6554	1	1	0.991488
Annotation Cluster 8	Enrichment Score: 1.4337046203004566
Category	Term	Count	%	PValue	Genes	List Total	Pop Hits	Pop Total	Fold Enrichment	Bonferroni	Benjamini	FDR
GOTERM_BP_FAT	GO:0042733~embryonic digit morphogenesis	5	1.46199	0.0206173	ENSG00000164066, ENSG00000005073, ENSG00000128714, ENSG00000123388, ENSG00000005339	282	62	16650	4.7615	1	0.800393	0.793398
GOTERM_BP_FAT	GO:0060173~limb development	8	2.33918	0.0255308	ENSG00000164066, ENSG00000175707, ENSG00000005073, ENSG00000102977, ENSG00000128714, ENSG00000123388, ENSG00000162878, ENSG00000005339	282	170	16650	2.77847	1	0.881017	0.873317
GOTERM_BP_FAT	GO:0048736~appendage development	8	2.33918	0.0255308	ENSG00000164066, ENSG00000175707, ENSG00000005073, ENSG00000102977, ENSG00000128714, ENSG00000123388, ENSG00000162878, ENSG00000005339	282	170	16650	2.77847	1	0.881017	0.873317
GOTERM_BP_FAT	GO:0035107~appendage morphogenesis	7	2.04678	0.0397252	ENSG00000164066, ENSG00000005073, ENSG00000102977, ENSG00000128714, ENSG00000123388, ENSG00000162878, ENSG00000005339	282	148	16650	2.79255	1	1	0.991488
GOTERM_BP_FAT	GO:0035108~limb morphogenesis	7	2.04678	0.0397252	ENSG00000164066, ENSG00000005073, ENSG00000102977, ENSG00000128714, ENSG00000123388, ENSG00000162878, ENSG00000005339	282	148	16650	2.79255	1	1	0.991488
GOTERM_BP_FAT	GO:0035113~embryonic appendage morphogenesis	6	1.75439	0.065885	ENSG00000164066, ENSG00000005073, ENSG00000102977, ENSG00000128714, ENSG00000123388, ENSG00000005339	282	128	16650	2.76762	1	1	0.991488
GOTERM_BP_FAT	GO:0030326~embryonic limb morphogenesis	6	1.75439	0.065885	ENSG00000164066, ENSG00000005073, ENSG00000102977, ENSG00000128714, ENSG00000123388, ENSG00000005339	282	128	16650	2.76762	1	1	0.991488
Annotation Cluster 9	Enrichment Score: 1.4134063785771678
Category	Term	Count	%	PValue	Genes	List Total	Pop Hits	Pop Total	Fold Enrichment	Bonferroni	Benjamini	FDR
GOTERM_BP_FAT	GO:0009855~determination of bilateral symmetry	7	2.04678	0.0193784	ENSG00000103241, ENSG00000158747, ENSG00000120697, ENSG00000183072, ENSG00000169126, ENSG00000109705, ENSG00000166823	282	125	16650	3.30638	1	0.780491	0.77367
GOTERM_BP_FAT	GO:0009799~specification of symmetry	7	2.04678	0.0200696	ENSG00000103241, ENSG00000158747, ENSG00000120697, ENSG00000183072, ENSG00000169126, ENSG00000109705, ENSG00000166823	282	126	16650	3.28014	1	0.791878	0.784958
GOTERM_BP_FAT	GO:0007368~determination of left/right symmetry	6	1.75439	0.0468077	ENSG00000103241, ENSG00000120697, ENSG00000183072, ENSG00000169126, ENSG00000109705, ENSG00000166823	282	116	16650	3.05393	1	1	0.991488
GOTERM_BP_FAT	GO:0003208~cardiac ventricle morphogenesis	4	1.16959	0.121955	ENSG00000103241, ENSG00000183072, ENSG00000157168, ENSG00000166823	282	72	16650	3.28014	1	1	0.991488
Annotation Cluster 10	Enrichment Score: 1.39860045125164
Category	Term	Count	%	PValue	Genes	List Total	Pop Hits	Pop Total	Fold Enrichment	Bonferroni	Benjamini	FDR
GOTERM_BP_FAT	GO:0051052~regulation of DNA metabolic process	13	3.80117	0.0237896	ENSG00000162607, ENSG00000181085, ENSG00000111247, ENSG00000076242, ENSG00000170485, ENSG00000136997, ENSG00000166313, ENSG00000182481, ENSG00000102977, ENSG00000120899, ENSG00000183765, ENSG00000127586, ENSG00000124795	282	370	16650	2.07447	1	0.847845	0.840435
GOTERM_BP_FAT	GO:2001020~regulation of response to DNA damage stimulus	7	2.04678	0.0516731	ENSG00000166313, ENSG00000162607, ENSG00000111247, ENSG00000170485, ENSG00000183765, ENSG00000136997, ENSG00000124795	282	158	16650	2.61581	1	1	0.991488
GOTERM_BP_FAT	GO:0006282~regulation of DNA repair	5	1.46199	0.051826	ENSG00000166313, ENSG00000162607, ENSG00000111247, ENSG00000170485, ENSG00000124795	282	83	16650	3.55678	1	1	0.991488
Annotation Cluster 11	Enrichment Score: 1.3845254731901901
Category	Term	Count	%	PValue	Genes	List Total	Pop Hits	Pop Total	Fold Enrichment	Bonferroni	Benjamini	FDR
GOTERM_BP_FAT	GO:0072091~regulation of stem cell proliferation	5	1.46199	0.0184961	ENSG00000175707, ENSG00000112715, ENSG00000164362, ENSG00000055332, ENSG00000142700	282	60	16650	4.92021	1	0.765917	0.759223
GOTERM_BP_FAT	GO:0072089~stem cell proliferation	6	1.75439	0.0282256	ENSG00000175707, ENSG00000112715, ENSG00000164362, ENSG00000055332, ENSG00000161800, ENSG00000142700	282	101	16650	3.50748	1	0.924946	0.916862
GOTERM_BP_FAT	GO:2000648~positive regulation of stem cell proliferation	3	0.877193	0.134493	ENSG00000112715, ENSG00000164362, ENSG00000142700	282	38	16650	4.66125	1	1	0.991488
Annotation Cluster 12	Enrichment Score: 1.3520484211366974
Category	Term	Count	%	PValue	Genes	List Total	Pop Hits	Pop Total	Fold Enrichment	Bonferroni	Benjamini	FDR
GOTERM_BP_FAT	GO:0045595~regulation of cell differentiation	46	13.4503	0.000200143	ENSG00000185507, ENSG00000158747, ENSG00000213023, ENSG00000099864, ENSG00000177508, ENSG00000136997, ENSG00000003402, ENSG00000185070, ENSG00000112183, ENSG00000166313, ENSG00000183072, ENSG00000148803, ENSG00000120899, ENSG00000055332, ENSG00000100300, ENSG00000162878, ENSG00000142700, ENSG00000122378, ENSG00000124772, ENSG00000103241, ENSG00000112715, ENSG00000178764, ENSG00000213694, ENSG0000…	282	1544	16650	1.75904	0.581178	0.100519	0.0996402
GOTERM_BP_FAT	GO:0048468~cell development	54	15.7895	0.000367222	ENSG00000130675, ENSG00000213023, ENSG00000099864, ENSG00000115318, ENSG00000170175, ENSG00000197457, ENSG00000003402, ENSG00000185070, ENSG00000166313, ENSG00000148803, ENSG00000136098, ENSG00000100300, ENSG00000142700, ENSG00000143355, ENSG00000112715, ENSG00000213694, ENSG00000171791, ENSG00000180340, ENSG00000092621, ENSG00000109705, ENSG00000137312, ENSG00000137273, ENSG00000175707, ENSG0000…	282	1968	16650	1.62007	0.797491	0.100519	0.0996402
GOTERM_BP_FAT	GO:0051962~positive regulation of nervous system development	19	5.55556	0.000647581	ENSG00000158747, ENSG00000112715, ENSG00000213023, ENSG00000099864, ENSG00000171791, ENSG00000157168, ENSG00000177508, ENSG00000167191, ENSG00000136997, ENSG00000185070, ENSG00000166313, ENSG00000183072, ENSG00000139211, ENSG00000120899, ENSG00000089116, ENSG00000169992, ENSG00000100300, ENSG00000142700, ENSG00000124772	282	449	16650	2.49846	0.940191	0.123002	0.121927
GOTERM_BP_FAT	GO:0045597~positive regulation of cell differentiation	28	8.18713	0.00105235	ENSG00000158747, ENSG00000213023, ENSG00000099864, ENSG00000177508, ENSG00000136997, ENSG00000166313, ENSG00000183072, ENSG00000120899, ENSG00000100300, ENSG00000162878, ENSG00000142700, ENSG00000124772, ENSG00000112715, ENSG00000171791, ENSG00000106538, ENSG00000151468, ENSG00000157168, ENSG00000167191, ENSG00000137312, ENSG00000005073, ENSG00000175707, ENSG00000102878, ENSG00000164362, ENSG0000…	282	841	16650	1.96574	0.989725	0.139771	0.13855
GOTERM_BP_FAT	GO:2000026~regulation of multicellular organismal development	47	13.7427	0.00111302	ENSG00000185507, ENSG00000158747, ENSG00000213023, ENSG00000099864, ENSG00000177508, ENSG00000136997, ENSG00000185070, ENSG00000166313, ENSG00000183072, ENSG00000148803, ENSG00000120899, ENSG00000055332, ENSG00000123388, ENSG00000128714, ENSG00000100300, ENSG00000162878, ENSG00000142700, ENSG00000122378, ENSG00000124772, ENSG00000112715, ENSG00000178764, ENSG00000213694, ENSG00000128165, ENSG0000…	282	1721	16650	1.61243	0.992109	0.139771	0.13855
GOTERM_BP_FAT	GO:0007399~nervous system development	54	15.7895	0.00334103	ENSG00000130675, ENSG00000213023, ENSG00000099864, ENSG00000139800, ENSG00000197457, ENSG00000185070, ENSG00000166313, ENSG00000148803, ENSG00000188620, ENSG00000136098, ENSG00000100300, ENSG00000142700, ENSG00000143355, ENSG00000112715, ENSG00000115507, ENSG00000171791, ENSG00000180340, ENSG00000092621, ENSG00000117724, ENSG00000159842, ENSG00000137312, ENSG00000164066, ENSG00000139211, ENSG0000…	282	2170	16650	1.46926	1	0.27409	0.271695
GOTERM_BP_FAT	GO:0060284~regulation of cell development	26	7.60234	0.00512006	ENSG00000158747, ENSG00000213023, ENSG00000099864, ENSG00000177508, ENSG00000136997, ENSG00000185070, ENSG00000166313, ENSG00000183072, ENSG00000148803, ENSG00000120899, ENSG00000100300, ENSG00000142700, ENSG00000124772, ENSG00000112715, ENSG00000178764, ENSG00000213694, ENSG00000132326, ENSG00000171791, ENSG00000157168, ENSG00000167191, ENSG00000005073, ENSG00000166147, ENSG00000116670, ENSG0000…	282	851	16650	1.80389	1	0.364951	0.361761
GOTERM_BP_FAT	GO:0051094~positive regulation of developmental process	31	9.06433	0.00556782	ENSG00000158747, ENSG00000213023, ENSG00000099864, ENSG00000177508, ENSG00000136997, ENSG00000185070, ENSG00000166313, ENSG00000183072, ENSG00000120899, ENSG00000123388, ENSG00000100300, ENSG00000162878, ENSG00000142700, ENSG00000124772, ENSG00000112715, ENSG00000128165, ENSG00000171791, ENSG00000129194, ENSG00000157168, ENSG00000167191, ENSG00000137312, ENSG00000005073, ENSG00000175707, ENSG0000…	282	1089	16650	1.68073	1	0.378264	0.374958
GOTERM_BP_FAT	GO:0051960~regulation of nervous system development	24	7.01754	0.00574496	ENSG00000158747, ENSG00000112715, ENSG00000178764, ENSG00000213023, ENSG00000132326, ENSG00000099864, ENSG00000180340, ENSG00000171791, ENSG00000157168, ENSG00000177508, ENSG00000167191, ENSG00000136997, ENSG00000185070, ENSG00000166313, ENSG00000183072, ENSG00000139211, ENSG00000148803, ENSG00000120899, ENSG00000089116, ENSG00000169992, ENSG00000164362, ENSG00000100300, ENSG00000142700, ENSG0000…	282	769	16650	1.84268	1	0.384293	0.380935
GOTERM_BP_FAT	GO:0051240~positive regulation of multicellular organismal process	38	11.1111	0.0060255	ENSG00000185507, ENSG00000158747, ENSG00000213023, ENSG00000099864, ENSG00000103490, ENSG00000120949, ENSG00000177508, ENSG00000136997, ENSG00000185070, ENSG00000166313, ENSG00000183072, ENSG00000120899, ENSG00000055332, ENSG00000123388, ENSG00000100300, ENSG00000162878, ENSG00000142700, ENSG00000124772, ENSG00000112715, ENSG00000128165, ENSG00000126561, ENSG00000171791, ENSG00000157168, ENSG0000…	282	1431	16650	1.56787	1	0.391463	0.388042
GOTERM_BP_FAT	GO:0050769~positive regulation of neurogenesis	15	4.38596	0.00625302	ENSG00000158747, ENSG00000112715, ENSG00000213023, ENSG00000099864, ENSG00000171791, ENSG00000157168, ENSG00000177508, ENSG00000167191, ENSG00000136997, ENSG00000166313, ENSG00000183072, ENSG00000120899, ENSG00000100300, ENSG00000142700, ENSG00000124772	282	387	16650	2.28847	1	0.394031	0.390587
GOTERM_BP_FAT	GO:0001558~regulation of cell growth	15	4.38596	0.00876452	ENSG00000112715, ENSG00000213023, ENSG00000107821, ENSG00000171791, ENSG00000157168, ENSG00000066735, ENSG00000123737, ENSG00000166313, ENSG00000116670, ENSG00000120899, ENSG00000144891, ENSG00000146674, ENSG00000069482, ENSG00000169418, ENSG00000124772	282	403	16650	2.19761	1	0.501423	0.49704
GOTERM_BP_FAT	GO:0040007~growth	26	7.60234	0.0150419	ENSG00000213023, ENSG00000003402, ENSG00000166313, ENSG00000183072, ENSG00000120899, ENSG00000128714, ENSG00000162878, ENSG00000124772, ENSG00000180447, ENSG00000112715, ENSG00000107821, ENSG00000126561, ENSG00000171791, ENSG00000197587, ENSG00000129194, ENSG00000157168, ENSG00000066735, ENSG00000123737, ENSG00000005073, ENSG00000175707, ENSG00000116670, ENSG00000146674, ENSG00000144891, ENSG0000…	282	932	16650	1.64711	1	0.727378	0.721021
GOTERM_BP_FAT	GO:0045666~positive regulation of neuron differentiation	12	3.50877	0.0165617	ENSG00000158747, ENSG00000112715, ENSG00000166313, ENSG00000213023, ENSG00000183072, ENSG00000099864, ENSG00000171791, ENSG00000120899, ENSG00000177508, ENSG00000157168, ENSG00000167191, ENSG00000124772	282	310	16650	2.28552	1	0.727378	0.721021
GOTERM_BP_FAT	GO:0010720~positive regulation of cell development	16	4.67836	0.0174856	ENSG00000158747, ENSG00000112715, ENSG00000213023, ENSG00000099864, ENSG00000171791, ENSG00000157168, ENSG00000177508, ENSG00000167191, ENSG00000136997, ENSG00000005073, ENSG00000166313, ENSG00000183072, ENSG00000120899, ENSG00000100300, ENSG00000142700, ENSG00000124772	282	483	16650	1.95586	1	0.745368	0.738854
GOTERM_BP_FAT	GO:0022008~neurogenesis	36	10.5263	0.0193866	ENSG00000158747, ENSG00000130675, ENSG00000213023, ENSG00000099864, ENSG00000173621, ENSG00000197457, ENSG00000177508, ENSG00000136997, ENSG00000185070, ENSG00000166313, ENSG00000183072, ENSG00000148803, ENSG00000136098, ENSG00000120899, ENSG00000100300, ENSG00000161800, ENSG00000142700, ENSG00000124772, ENSG00000143355, ENSG00000112715, ENSG00000178764, ENSG00000154134, ENSG00000132326, ENSG0000…	282	1447	16650	1.46892	1	0.780491	0.77367
GOTERM_BP_FAT	GO:0048699~generation of neurons	34	9.94152	0.0214071	ENSG00000158747, ENSG00000130675, ENSG00000213023, ENSG00000099864, ENSG00000173621, ENSG00000197457, ENSG00000177508, ENSG00000136997, ENSG00000185070, ENSG00000166313, ENSG00000183072, ENSG00000148803, ENSG00000136098, ENSG00000120899, ENSG00000100300, ENSG00000161800, ENSG00000142700, ENSG00000124772, ENSG00000143355, ENSG00000112715, ENSG00000178764, ENSG00000154134, ENSG00000132326, ENSG0000…	282	1357	16650	1.47933	1	0.81296	0.805855
GOTERM_BP_FAT	GO:0050767~regulation of neurogenesis	20	5.84795	0.0227527	ENSG00000158747, ENSG00000112715, ENSG00000178764, ENSG00000213023, ENSG00000132326, ENSG00000099864, ENSG00000171791, ENSG00000157168, ENSG00000177508, ENSG00000167191, ENSG00000136997, ENSG00000185070, ENSG00000166313, ENSG00000183072, ENSG00000148803, ENSG00000120899, ENSG00000164362, ENSG00000100300, ENSG00000142700, ENSG00000124772	282	682	16650	1.73145	1	0.835998	0.828691
GOTERM_BP_FAT	GO:0031175~neuron projection development	22	6.43275	0.0367595	ENSG00000130675, ENSG00000158747, ENSG00000112715, ENSG00000213023, ENSG00000154134, ENSG00000174684, ENSG00000099864, ENSG00000092621, ENSG00000171791, ENSG00000173621, ENSG00000197457, ENSG00000157168, ENSG00000167191, ENSG00000066735, ENSG00000137312, ENSG00000185070, ENSG00000166313, ENSG00000136098, ENSG00000120899, ENSG00000100300, ENSG00000124772, ENSG00000143355	282	817	16650	1.58989	1	1	0.991488
GOTERM_BP_FAT	GO:0032989~cellular component morphogenesis	32	9.35673	0.0392636	ENSG00000158747, ENSG00000130675, ENSG00000213023, ENSG00000099864, ENSG00000115318, ENSG00000173621, ENSG00000003402, ENSG00000112144, ENSG00000185070, ENSG00000166313, ENSG00000183072, ENSG00000169126, ENSG00000136098, ENSG00000120899, ENSG00000166452, ENSG00000124772, ENSG00000184922, ENSG00000143355, ENSG00000112715, ENSG00000154134, ENSG00000174684, ENSG00000171791, ENSG00000065882, ENSG0000…	282	1321	16650	1.43025	1	1	0.991488
GOTERM_BP_FAT	GO:0030182~neuron differentiation	30	8.77193	0.0406895	ENSG00000158747, ENSG00000130675, ENSG00000213023, ENSG00000099864, ENSG00000173621, ENSG00000197457, ENSG00000177508, ENSG00000185070, ENSG00000166313, ENSG00000183072, ENSG00000148803, ENSG00000136098, ENSG00000120899, ENSG00000100300, ENSG00000142700, ENSG00000124772, ENSG00000143355, ENSG00000112715, ENSG00000178764, ENSG00000154134, ENSG00000174684, ENSG00000171791, ENSG00000180340, ENSG0000…	282	1226	16650	1.44476	1	1	0.991488
GOTERM_BP_FAT	GO:0048812~neuron projection morphogenesis	16	4.67836	0.0431586	ENSG00000130675, ENSG00000158747, ENSG00000112715, ENSG00000213023, ENSG00000154134, ENSG00000174684, ENSG00000171791, ENSG00000173621, ENSG00000157168, ENSG00000066735, ENSG00000137312, ENSG00000185070, ENSG00000166313, ENSG00000136098, ENSG00000124772, ENSG00000143355	282	543	16650	1.73974	1	1	0.991488
GOTERM_BP_FAT	GO:0030307~positive regulation of cell growth	7	2.04678	0.0466585	ENSG00000123737, ENSG00000112715, ENSG00000213023, ENSG00000171791, ENSG00000120899, ENSG00000157168, ENSG00000124772	282	154	16650	2.68375	1	1	0.991488
GOTERM_BP_FAT	GO:0000902~cell morphogenesis	30	8.77193	0.0468612	ENSG00000158747, ENSG00000130675, ENSG00000213023, ENSG00000099864, ENSG00000115318, ENSG00000173621, ENSG00000112144, ENSG00000185070, ENSG00000166313, ENSG00000169126, ENSG00000136098, ENSG00000120899, ENSG00000166452, ENSG00000124772, ENSG00000184922, ENSG00000143355, ENSG00000112715, ENSG00000154134, ENSG00000174684, ENSG00000171791, ENSG00000065882, ENSG00000157168, ENSG00000135315, ENSG0000…	282	1240	16650	1.42845	1	1	0.991488
GOTERM_BP_FAT	GO:0040008~regulation of growth	18	5.26316	0.0512524	ENSG00000112715, ENSG00000213023, ENSG00000107821, ENSG00000126561, ENSG00000171791, ENSG00000129194, ENSG00000157168, ENSG00000066735, ENSG00000123737, ENSG00000166313, ENSG00000183072, ENSG00000116670, ENSG00000120899, ENSG00000144891, ENSG00000146674, ENSG00000069482, ENSG00000169418, ENSG00000124772	282	652	16650	1.63001	1	1	0.991488
GOTERM_BP_FAT	GO:0048858~cell projection morphogenesis	20	5.84795	0.0833041	ENSG00000130675, ENSG00000158747, ENSG00000112715, ENSG00000213023, ENSG00000154134, ENSG00000174684, ENSG00000171791, ENSG00000173621, ENSG00000157168, ENSG00000135315, ENSG00000066735, ENSG00000137312, ENSG00000112144, ENSG00000185070, ENSG00000164066, ENSG00000166313, ENSG00000169126, ENSG00000136098, ENSG00000124772, ENSG00000143355	282	797	16650	1.48162	1	1	0.991488
GOTERM_BP_FAT	GO:0048666~neuron development	23	6.72515	0.0936026	ENSG00000130675, ENSG00000158747, ENSG00000112715, ENSG00000213023, ENSG00000154134, ENSG00000174684, ENSG00000099864, ENSG00000180340, ENSG00000092621, ENSG00000171791, ENSG00000173621, ENSG00000197457, ENSG00000157168, ENSG00000167191, ENSG00000066735, ENSG00000137312, ENSG00000185070, ENSG00000166313, ENSG00000136098, ENSG00000120899, ENSG00000100300, ENSG00000124772, ENSG00000143355	282	965	16650	1.40723	1	1	0.991488
GOTERM_BP_FAT	GO:0010976~positive regulation of neuron projection development	8	2.33918	0.0939247	ENSG00000112715, ENSG00000166313, ENSG00000213023, ENSG00000099864, ENSG00000120899, ENSG00000157168, ENSG00000167191, ENSG00000124772	282	229	16650	2.06262	1	1	0.991488
GOTERM_BP_FAT	GO:0032990~cell part morphogenesis	20	5.84795	0.0983819	ENSG00000130675, ENSG00000158747, ENSG00000112715, ENSG00000213023, ENSG00000154134, ENSG00000174684, ENSG00000171791, ENSG00000173621, ENSG00000157168, ENSG00000135315, ENSG00000066735, ENSG00000137312, ENSG00000112144, ENSG00000185070, ENSG00000164066, ENSG00000166313, ENSG00000169126, ENSG00000136098, ENSG00000124772, ENSG00000143355	282	817	16650	1.44535	1	1	0.991488
GOTERM_BP_FAT	GO:0045927~positive regulation of growth	8	2.33918	0.123869	ENSG00000123737, ENSG00000112715, ENSG00000213023, ENSG00000171791, ENSG00000120899, ENSG00000129194, ENSG00000157168, ENSG00000124772	282	246	16650	1.92008	1	1	0.991488
GOTERM_BP_FAT	GO:0061564~axon development	12	3.50877	0.133582	ENSG00000112715, ENSG00000166313, ENSG00000154134, ENSG00000174684, ENSG00000171791, ENSG00000173621, ENSG00000100300, ENSG00000157168, ENSG00000066735, ENSG00000137312, ENSG00000143355, ENSG00000185070	282	445	16650	1.59216	1	1	0.991488
GOTERM_BP_FAT	GO:0060560~developmental growth involved in morphogenesis	7	2.04678	0.134193	ENSG00000112715, ENSG00000213023, ENSG00000128714, ENSG00000157168, ENSG00000069482, ENSG00000124772, ENSG00000166823	282	205	16650	2.01609	1	1	0.991488
GOTERM_BP_FAT	GO:0048639~positive regulation of developmental growth	6	1.75439	0.137062	ENSG00000112715, ENSG00000213023, ENSG00000171791, ENSG00000129194, ENSG00000157168, ENSG00000124772	282	161	16650	2.20034	1	1	0.991488
GOTERM_BP_FAT	GO:0048638~regulation of developmental growth	9	2.63158	0.141177	ENSG00000112715, ENSG00000213023, ENSG00000183072, ENSG00000126561, ENSG00000171791, ENSG00000129194, ENSG00000157168, ENSG00000069482, ENSG00000124772	282	303	16650	1.75374	1	1	0.991488
GOTERM_BP_FAT	GO:0045664~regulation of neuron differentiation	14	4.09357	0.153447	ENSG00000158747, ENSG00000112715, ENSG00000178764, ENSG00000213023, ENSG00000099864, ENSG00000171791, ENSG00000157168, ENSG00000177508, ENSG00000167191, ENSG00000166313, ENSG00000183072, ENSG00000148803, ENSG00000120899, ENSG00000124772	282	560	16650	1.47606	1	1	0.991488
GOTERM_BP_FAT	GO:0030030~cell projection organization	28	8.18713	0.153778	ENSG00000158747, ENSG00000130675, ENSG00000213023, ENSG00000099864, ENSG00000173621, ENSG00000197457, ENSG00000112144, ENSG00000185070, ENSG00000166313, ENSG00000169126, ENSG00000136098, ENSG00000120899, ENSG00000100300, ENSG00000124772, ENSG00000143355, ENSG00000112715, ENSG00000154134, ENSG00000174684, ENSG00000171791, ENSG00000065882, ENSG00000092621, ENSG00000157168, ENSG00000135315, ENSG0000…	282	1301	16650	1.27071	1	1	0.991488
GOTERM_BP_FAT	GO:0007409~axonogenesis	11	3.21637	0.161754	ENSG00000112715, ENSG00000166313, ENSG00000154134, ENSG00000174684, ENSG00000171791, ENSG00000173621, ENSG00000157168, ENSG00000066735, ENSG00000137312, ENSG00000143355, ENSG00000185070	282	413	16650	1.57256	1	1	0.991488
GOTERM_BP_FAT	GO:0000904~cell morphogenesis involved in differentiation	17	4.97076	0.204799	ENSG00000112715, ENSG00000154134, ENSG00000174684, ENSG00000171791, ENSG00000115318, ENSG00000173621, ENSG00000157168, ENSG00000066735, ENSG00000137312, ENSG00000185070, ENSG00000137273, ENSG00000166313, ENSG00000116670, ENSG00000166452, ENSG00000179051, ENSG00000162367, ENSG00000143355	282	753	16650	1.33297	1	1	0.991488
GOTERM_BP_FAT	GO:0016049~cell growth	11	3.21637	0.2061	ENSG00000123737, ENSG00000112715, ENSG00000166313, ENSG00000213023, ENSG00000171791, ENSG00000120899, ENSG00000157168, ENSG00000069482, ENSG00000169418, ENSG00000066735, ENSG00000124772	282	436	16650	1.48961	1	1	0.991488
GOTERM_BP_FAT	GO:0031346~positive regulation of cell projection organization	8	2.33918	0.255369	ENSG00000112715, ENSG00000166313, ENSG00000213023, ENSG00000099864, ENSG00000120899, ENSG00000157168, ENSG00000167191, ENSG00000124772	282	304	16650	1.55375	1	1	0.991488
GOTERM_BP_FAT	GO:0007411~axon guidance	6	1.75439	0.324425	ENSG00000112715, ENSG00000154134, ENSG00000174684, ENSG00000066735, ENSG00000143355, ENSG00000185070	282	223	16650	1.58859	1	1	0.991488
GOTERM_BP_FAT	GO:0097485~neuron projection guidance	6	1.75439	0.326345	ENSG00000112715, ENSG00000154134, ENSG00000174684, ENSG00000066735, ENSG00000143355, ENSG00000185070	282	224	16650	1.5815	1	1	0.991488
GOTERM_BP_FAT	GO:0048667~cell morphogenesis involved in neuron differentiation	11	3.21637	0.329299	ENSG00000112715, ENSG00000166313, ENSG00000154134, ENSG00000174684, ENSG00000171791, ENSG00000173621, ENSG00000157168, ENSG00000066735, ENSG00000137312, ENSG00000143355, ENSG00000185070	282	496	16650	1.30941	1	1	0.991488
GOTERM_BP_FAT	GO:0006935~chemotaxis	12	3.50877	0.332181	ENSG00000158747, ENSG00000112715, ENSG00000089505, ENSG00000154134, ENSG00000174684, ENSG00000120899, ENSG00000106538, ENSG00000144891, ENSG00000157168, ENSG00000066735, ENSG00000143355, ENSG00000185070	282	552	16650	1.28353	1	1	0.991488
GOTERM_BP_FAT	GO:0042330~taxis	12	3.50877	0.33348	ENSG00000158747, ENSG00000112715, ENSG00000089505, ENSG00000154134, ENSG00000174684, ENSG00000120899, ENSG00000106538, ENSG00000144891, ENSG00000157168, ENSG00000066735, ENSG00000143355, ENSG00000185070	282	553	16650	1.28121	1	1	0.991488
GOTERM_BP_FAT	GO:0048588~developmental cell growth	5	1.46199	0.392113	ENSG00000112715, ENSG00000213023, ENSG00000157168, ENSG00000069482, ENSG00000124772	282	188	16650	1.57028	1	1	0.991488
GOTERM_BP_FAT	GO:1990138~neuron projection extension	4	1.16959	0.426215	ENSG00000112715, ENSG00000213023, ENSG00000157168, ENSG00000124772	282	141	16650	1.67497	1	1	0.991488
GOTERM_BP_FAT	GO:0051130~positive regulation of cellular component organization	21	6.14035	0.530548	ENSG00000112715, ENSG00000213023, ENSG00000099864, ENSG00000103490, ENSG00000171791, ENSG00000029534, ENSG00000181085, ENSG00000157168, ENSG00000158445, ENSG00000167191, ENSG00000159842, ENSG00000137312, ENSG00000185070, ENSG00000166313, ENSG00000183072, ENSG00000139211, ENSG00000102977, ENSG00000120899, ENSG00000169992, ENSG00000124772, ENSG00000162367	282	1183	16650	1.04809	1	1	0.991488
GOTERM_BP_FAT	GO:0010975~regulation of neuron projection development	8	2.33918	0.548878	ENSG00000112715, ENSG00000166313, ENSG00000213023, ENSG00000099864, ENSG00000120899, ENSG00000157168, ENSG00000167191, ENSG00000124772	282	413	16650	1.14368	1	1	0.991488
GOTERM_BP_FAT	GO:0022604~regulation of cell morphogenesis	10	2.92398	0.623688	ENSG00000112715, ENSG00000213023, ENSG00000116670, ENSG00000099864, ENSG00000065882, ENSG00000120899, ENSG00000179051, ENSG00000157168, ENSG00000184922, ENSG00000124772	282	568	16650	1.03948	1	1	0.991488
GOTERM_BP_FAT	GO:0031344~regulation of cell projection organization	10	2.92398	0.632021	ENSG00000112715, ENSG00000166313, ENSG00000213023, ENSG00000099864, ENSG00000065882, ENSG00000120899, ENSG00000179051, ENSG00000157168, ENSG00000167191, ENSG00000124772	282	572	16650	1.03221	1	1	0.991488
Annotation Cluster 13	Enrichment Score: 1.2757844899981912
Category	Term	Count	%	PValue	Genes	List Total	Pop Hits	Pop Total	Fold Enrichment	Bonferroni	Benjamini	FDR
GOTERM_BP_FAT	GO:0006259~DNA metabolic process	26	7.60234	0.0304326	ENSG00000174371, ENSG00000134758, ENSG00000197771, ENSG00000162607, ENSG00000181085, ENSG00000196367, ENSG00000076242, ENSG00000100918, ENSG00000136997, ENSG00000166313, ENSG00000182481, ENSG00000120899, ENSG00000125821, ENSG00000127586, ENSG00000184900, ENSG00000124795, ENSG00000128951, ENSG00000111247, ENSG00000117724, ENSG00000170485, ENSG00000116670, ENSG00000102977, ENSG00000164362, ENSG0000…	282	995	16650	1.54282	1	0.951949	0.943629
GOTERM_BP_FAT	GO:0006974~cellular response to DNA damage stimulus	22	6.43275	0.0331102	ENSG00000185507, ENSG00000174371, ENSG00000134758, ENSG00000181991, ENSG00000103490, ENSG00000171791, ENSG00000162607, ENSG00000196367, ENSG00000111247, ENSG00000076242, ENSG00000170485, ENSG00000100918, ENSG00000116017, ENSG00000136997, ENSG00000166313, ENSG00000116670, ENSG00000102977, ENSG00000166803, ENSG00000183765, ENSG00000140398, ENSG00000184900, ENSG00000124795	282	807	16650	1.60959	1	0.992426	0.983753
GOTERM_BP_FAT	GO:0006302~double-strand break repair	8	2.33918	0.0612699	ENSG00000134758, ENSG00000166313, ENSG00000116670, ENSG00000111247, ENSG00000076242, ENSG00000100918, ENSG00000183765, ENSG00000124795	282	206	16650	2.29291	1	1	0.991488
GOTERM_BP_FAT	GO:0006281~DNA repair	15	4.38596	0.0662668	ENSG00000174371, ENSG00000134758, ENSG00000162607, ENSG00000196367, ENSG00000111247, ENSG00000076242, ENSG00000170485, ENSG00000100918, ENSG00000166313, ENSG00000116670, ENSG00000166803, ENSG00000183765, ENSG00000140398, ENSG00000184900, ENSG00000124795	282	530	16650	1.67102	1	1	0.991488
GOTERM_BP_FAT	GO:0033554~cellular response to stress	38	11.1111	0.102149	ENSG00000185507, ENSG00000174371, ENSG00000134758, ENSG00000214575, ENSG00000213024, ENSG00000103490, ENSG00000162607, ENSG00000196367, ENSG00000076242, ENSG00000100918, ENSG00000005882, ENSG00000136997, ENSG00000166313, ENSG00000120899, ENSG00000055332, ENSG00000149599, ENSG00000100300, ENSG00000184900, ENSG00000164897, ENSG00000124795, ENSG00000112715, ENSG00000181991, ENSG00000171791, ENSG0000…	282	1773	16650	1.26544	1	1	0.991488
Annotation Cluster 14	Enrichment Score: 1.2622366023160345
Category	Term	Count	%	PValue	Genes	List Total	Pop Hits	Pop Total	Fold Enrichment	Bonferroni	Benjamini	FDR
GOTERM_BP_FAT	GO:0002573~myeloid leukocyte differentiation	11	3.21637	0.00179513	ENSG00000185507, ENSG00000112715, ENSG00000166147, ENSG00000123999, ENSG00000107957, ENSG00000114115, ENSG00000136997, ENSG00000122378, ENSG00000064932, ENSG00000142611, ENSG00000162367	282	195	16650	3.33061	0.999595	0.169679	0.168196
GOTERM_BP_FAT	GO:0002761~regulation of myeloid leukocyte differentiation	8	2.33918	0.00305405	ENSG00000185507, ENSG00000166147, ENSG00000123999, ENSG00000114115, ENSG00000136997, ENSG00000122378, ENSG00000142611, ENSG00000162367	282	113	16650	4.18	0.999998	0.255365	0.253133
GOTERM_BP_FAT	GO:0030099~myeloid cell differentiation	13	3.80117	0.0139498	ENSG00000185507, ENSG00000112715, ENSG00000107957, ENSG00000114115, ENSG00000136997, ENSG00000064932, ENSG00000166147, ENSG00000123999, ENSG00000120899, ENSG00000122378, ENSG00000160710, ENSG00000142611, ENSG00000162367	282	343	16650	2.23776	1	0.689245	0.683221
GOTERM_BP_FAT	GO:0045637~regulation of myeloid cell differentiation	9	2.63158	0.0160011	ENSG00000185507, ENSG00000166147, ENSG00000123999, ENSG00000120899, ENSG00000114115, ENSG00000136997, ENSG00000122378, ENSG00000142611, ENSG00000162367	282	191	16650	2.78211	1	0.727378	0.721021
GOTERM_BP_FAT	GO:0002762~negative regulation of myeloid leukocyte differentiation	4	1.16959	0.052152	ENSG00000166147, ENSG00000123999, ENSG00000136997, ENSG00000142611	282	50	16650	4.7234	1	1	0.991488
GOTERM_BP_FAT	GO:0002521~leukocyte differentiation	14	4.09357	0.0594542	ENSG00000185507, ENSG00000112715, ENSG00000171791, ENSG00000107957, ENSG00000114115, ENSG00000136997, ENSG00000064932, ENSG00000166147, ENSG00000123999, ENSG00000120899, ENSG00000067082, ENSG00000122378, ENSG00000142611, ENSG00000162367	282	474	16650	1.74387	1	1	0.991488
GOTERM_BP_FAT	GO:0002520~immune system development	21	6.14035	0.0641422	ENSG00000185507, ENSG00000174371, ENSG00000112715, ENSG00000171791, ENSG00000109705, ENSG00000107957, ENSG00000114115, ENSG00000076242, ENSG00000136997, ENSG00000064932, ENSG00000183072, ENSG00000166147, ENSG00000123999, ENSG00000120899, ENSG00000055332, ENSG00000227507, ENSG00000067082, ENSG00000122378, ENSG00000160710, ENSG00000142611, ENSG00000162367	282	821	16650	1.51022	1	1	0.991488
GOTERM_BP_FAT	GO:0045638~negative regulation of myeloid cell differentiation	5	1.46199	0.0724952	ENSG00000166147, ENSG00000123999, ENSG00000120899, ENSG00000136997, ENSG00000142611	282	93	16650	3.17433	1	1	0.991488
GOTERM_BP_FAT	GO:1903706~regulation of hemopoiesis	10	2.92398	0.104796	ENSG00000185507, ENSG00000166147, ENSG00000123999, ENSG00000120899, ENSG00000055332, ENSG00000114115, ENSG00000136997, ENSG00000122378, ENSG00000142611, ENSG00000162367	282	328	16650	1.80008	1	1	0.991488
GOTERM_BP_FAT	GO:0048534~hematopoietic or lymphoid organ development	19	5.55556	0.109866	ENSG00000185507, ENSG00000112715, ENSG00000171791, ENSG00000109705, ENSG00000107957, ENSG00000114115, ENSG00000136997, ENSG00000064932, ENSG00000183072, ENSG00000166147, ENSG00000123999, ENSG00000120899, ENSG00000055332, ENSG00000227507, ENSG00000067082, ENSG00000122378, ENSG00000160710, ENSG00000142611, ENSG00000162367	282	778	16650	1.44191	1	1	0.991488
GOTERM_BP_FAT	GO:1902105~regulation of leukocyte differentiation	8	2.33918	0.119678	ENSG00000185507, ENSG00000166147, ENSG00000123999, ENSG00000114115, ENSG00000136997, ENSG00000122378, ENSG00000142611, ENSG00000162367	282	244	16650	1.93582	1	1	0.991488
GOTERM_BP_FAT	GO:0002683~negative regulation of immune system process	11	3.21637	0.122315	ENSG00000103241, ENSG00000158747, ENSG00000166147, ENSG00000123999, ENSG00000120899, ENSG00000055332, ENSG00000069482, ENSG00000136997, ENSG00000160710, ENSG00000142611, ENSG00000159842	282	388	16650	1.67389	1	1	0.991488
GOTERM_BP_FAT	GO:1902106~negative regulation of leukocyte differentiation	4	1.16959	0.185977	ENSG00000166147, ENSG00000123999, ENSG00000136997, ENSG00000142611	282	88	16650	2.68375	1	1	0.991488
GOTERM_BP_FAT	GO:0030097~hemopoiesis	17	4.97076	0.191347	ENSG00000185507, ENSG00000112715, ENSG00000171791, ENSG00000107957, ENSG00000114115, ENSG00000136997, ENSG00000064932, ENSG00000183072, ENSG00000166147, ENSG00000123999, ENSG00000120899, ENSG00000055332, ENSG00000067082, ENSG00000122378, ENSG00000160710, ENSG00000142611, ENSG00000162367	282	739	16650	1.35822	1	1	0.991488
GOTERM_BP_FAT	GO:1903707~negative regulation of hemopoiesis	5	1.46199	0.197855	ENSG00000166147, ENSG00000123999, ENSG00000120899, ENSG00000136997, ENSG00000142611	282	136	16650	2.17068	1	1	0.991488
GOTERM_BP_FAT	GO:0002682~regulation of immune system process	27	7.89474	0.304291	ENSG00000047621, ENSG00000185507, ENSG00000158747, ENSG00000103490, ENSG00000136997, ENSG00000120899, ENSG00000055332, ENSG00000122378, ENSG00000160710, ENSG00000103241, ENSG00000112715, ENSG00000255690, ENSG00000171791, ENSG00000106538, ENSG00000114115, ENSG00000005339, ENSG00000167191, ENSG00000159842, ENSG00000137312, ENSG00000166147, ENSG00000204642, ENSG00000204267, ENSG00000123999, ENSG0000…	282	1378	16650	1.15686	1	1	0.991488
Annotation Cluster 15	Enrichment Score: 1.2001110219968827
Category	Term	Count	%	PValue	Genes	List Total	Pop Hits	Pop Total	Fold Enrichment	Bonferroni	Benjamini	FDR
GOTERM_BP_FAT	GO:0048568~embryonic organ development	18	5.26316	0.000755796	ENSG00000103241, ENSG00000112715, ENSG00000115507, ENSG00000180340, ENSG00000109705, ENSG00000112559, ENSG00000106538, ENSG00000159842, ENSG00000137273, ENSG00000005073, ENSG00000183072, ENSG00000166147, ENSG00000188620, ENSG00000123388, ENSG00000162878, ENSG00000092607, ENSG00000162367, ENSG00000166823	282	417	16650	2.5486	0.962651	0.124433	0.123346
GOTERM_BP_FAT	GO:0009790~embryo development	31	9.06433	0.000772699	ENSG00000177508, ENSG00000136997, ENSG00000171700, ENSG00000183072, ENSG00000188620, ENSG00000151725, ENSG00000123388, ENSG00000128714, ENSG00000162878, ENSG00000161800, ENSG00000160710, ENSG00000092607, ENSG00000103241, ENSG00000112715, ENSG00000115507, ENSG00000180340, ENSG00000092621, ENSG00000109705, ENSG00000112559, ENSG00000106538, ENSG00000157168, ENSG00000005339, ENSG00000159842, ENSG0000…	282	954	16650	1.91857	0.965299	0.124433	0.123346
GOTERM_BP_FAT	GO:0048562~embryonic organ morphogenesis	14	4.09357	0.00118941	ENSG00000103241, ENSG00000115507, ENSG00000180340, ENSG00000109705, ENSG00000112559, ENSG00000159842, ENSG00000137273, ENSG00000005073, ENSG00000183072, ENSG00000166147, ENSG00000188620, ENSG00000123388, ENSG00000092607, ENSG00000166823	282	286	16650	2.89019	0.994342	0.139771	0.13855
GOTERM_BP_FAT	GO:0048598~embryonic morphogenesis	21	6.14035	0.0017229	ENSG00000103241, ENSG00000115507, ENSG00000180340, ENSG00000109705, ENSG00000112559, ENSG00000177508, ENSG00000005339, ENSG00000159842, ENSG00000164066, ENSG00000137273, ENSG00000175707, ENSG00000005073, ENSG00000183072, ENSG00000166147, ENSG00000188620, ENSG00000102977, ENSG00000128714, ENSG00000123388, ENSG00000092607, ENSG00000162367, ENSG00000166823	282	571	16650	2.17144	0.999446	0.166471	0.165016
GOTERM_BP_FAT	GO:0035295~tube development	20	5.84795	0.00461422	ENSG00000103241, ENSG00000112715, ENSG00000130700, ENSG00000180340, ENSG00000092621, ENSG00000171791, ENSG00000109705, ENSG00000106538, ENSG00000177508, ENSG00000100918, ENSG00000136997, ENSG00000164066, ENSG00000137273, ENSG00000005073, ENSG00000183072, ENSG00000113083, ENSG00000204435, ENSG00000128714, ENSG00000162878, ENSG00000166823	282	580	16650	2.03595	1	0.345907	0.342884
GOTERM_BP_FAT	GO:0007548~sex differentiation	12	3.50877	0.00614963	ENSG00000137273, ENSG00000165474, ENSG00000005073, ENSG00000112715, ENSG00000171791, ENSG00000123999, ENSG00000128714, ENSG00000129194, ENSG00000100918, ENSG00000142700, ENSG00000136997, ENSG00000143355	282	269	16650	2.63387	1	0.393215	0.389778
GOTERM_BP_FAT	GO:0009887~organ morphogenesis	27	7.89474	0.0173433	ENSG00000177508, ENSG00000136997, ENSG00000185070, ENSG00000171812, ENSG00000183072, ENSG00000188620, ENSG00000204335, ENSG00000123388, ENSG00000128714, ENSG00000092607, ENSG00000143355, ENSG00000103241, ENSG00000112715, ENSG00000115507, ENSG00000130700, ENSG00000171791, ENSG00000180340, ENSG00000109705, ENSG00000112559, ENSG00000157168, ENSG00000159842, ENSG00000137273, ENSG00000005073, ENSG0000…	282	992	16650	1.607	1	0.745368	0.738854
GOTERM_BP_FAT	GO:0001656~metanephros development	6	1.75439	0.0173721	ENSG00000005073, ENSG00000166147, ENSG00000171791, ENSG00000123388, ENSG00000177508, ENSG00000136997	282	89	16650	3.9804	1	0.745368	0.738854
GOTERM_BP_FAT	GO:0046661~male sex differentiation	8	2.33918	0.0178795	ENSG00000165474, ENSG00000005073, ENSG00000171791, ENSG00000123999, ENSG00000128714, ENSG00000129194, ENSG00000100918, ENSG00000143355	282	158	16650	2.9895	1	0.754757	0.748161
GOTERM_BP_FAT	GO:0001655~urogenital system development	12	3.50877	0.0202158	ENSG00000103241, ENSG00000005073, ENSG00000112715, ENSG00000166147, ENSG00000102977, ENSG00000171791, ENSG00000128714, ENSG00000123388, ENSG00000117724, ENSG00000144891, ENSG00000177508, ENSG00000136997	282	320	16650	2.2141	1	0.791878	0.784958
GOTERM_BP_FAT	GO:0072078~nephron tubule morphogenesis	5	1.46199	0.0348983	ENSG00000005073, ENSG00000112715, ENSG00000171791, ENSG00000177508, ENSG00000136997	282	73	16650	4.04401	1	1	0.991488
GOTERM_BP_FAT	GO:0072088~nephron epithelium morphogenesis	5	1.46199	0.0395794	ENSG00000005073, ENSG00000112715, ENSG00000171791, ENSG00000177508, ENSG00000136997	282	76	16650	3.88438	1	1	0.991488
GOTERM_BP_FAT	GO:0061333~renal tubule morphogenesis	5	1.46199	0.0412154	ENSG00000005073, ENSG00000112715, ENSG00000171791, ENSG00000177508, ENSG00000136997	282	77	16650	3.83393	1	1	0.991488
GOTERM_BP_FAT	GO:0072028~nephron morphogenesis	5	1.46199	0.0428893	ENSG00000005073, ENSG00000112715, ENSG00000171791, ENSG00000177508, ENSG00000136997	282	78	16650	3.78478	1	1	0.991488
GOTERM_BP_FAT	GO:0072001~renal system development	10	2.92398	0.0513702	ENSG00000103241, ENSG00000005073, ENSG00000112715, ENSG00000166147, ENSG00000171791, ENSG00000123388, ENSG00000117724, ENSG00000144891, ENSG00000177508, ENSG00000136997	282	283	16650	2.08631	1	1	0.991488
GOTERM_BP_FAT	GO:0001541~ovarian follicle development	4	1.16959	0.0601135	ENSG00000112715, ENSG00000171791, ENSG00000123999, ENSG00000136997	282	53	16650	4.45604	1	1	0.991488
GOTERM_BP_FAT	GO:0007498~mesoderm development	6	1.75439	0.0641513	ENSG00000103241, ENSG00000005073, ENSG00000112715, ENSG00000177508, ENSG00000162367, ENSG00000166823	282	127	16650	2.78941	1	1	0.991488
GOTERM_BP_FAT	GO:0043009~chordate embryonic development	16	4.67836	0.0652198	ENSG00000103241, ENSG00000112715, ENSG00000180340, ENSG00000092621, ENSG00000109705, ENSG00000112559, ENSG00000106538, ENSG00000136997, ENSG00000171700, ENSG00000164066, ENSG00000005073, ENSG00000183072, ENSG00000151725, ENSG00000123388, ENSG00000160710, ENSG00000092607	282	577	16650	1.63723	1	1	0.991488
GOTERM_BP_FAT	GO:0008585~female gonad development	5	1.46199	0.0659092	ENSG00000112715, ENSG00000171791, ENSG00000123999, ENSG00000136997, ENSG00000143355	282	90	16650	3.28014	1	1	0.991488
GOTERM_BP_FAT	GO:0009792~embryo development ending in birth or egg hatching	16	4.67836	0.0679585	ENSG00000103241, ENSG00000112715, ENSG00000180340, ENSG00000092621, ENSG00000109705, ENSG00000112559, ENSG00000106538, ENSG00000136997, ENSG00000171700, ENSG00000164066, ENSG00000005073, ENSG00000183072, ENSG00000151725, ENSG00000123388, ENSG00000160710, ENSG00000092607	282	583	16650	1.62038	1	1	0.991488
GOTERM_BP_FAT	GO:0008406~gonad development	8	2.33918	0.0699668	ENSG00000005073, ENSG00000112715, ENSG00000171791, ENSG00000123999, ENSG00000129194, ENSG00000100918, ENSG00000136997, ENSG00000143355	282	213	16650	2.21756	1	1	0.991488
GOTERM_BP_FAT	GO:0072080~nephron tubule development	5	1.46199	0.0702638	ENSG00000005073, ENSG00000112715, ENSG00000171791, ENSG00000177508, ENSG00000136997	282	92	16650	3.20883	1	1	0.991488
GOTERM_BP_FAT	GO:0035239~tube morphogenesis	11	3.21637	0.0716057	ENSG00000103241, ENSG00000005073, ENSG00000112715, ENSG00000183072, ENSG00000171791, ENSG00000204435, ENSG00000180340, ENSG00000128714, ENSG00000177508, ENSG00000136997, ENSG00000166823	282	348	16650	1.86629	1	1	0.991488
GOTERM_BP_FAT	GO:0001658~branching involved in ureteric bud morphogenesis	4	1.16959	0.0745557	ENSG00000005073, ENSG00000112715, ENSG00000171791, ENSG00000136997	282	58	16650	4.0719	1	1	0.991488
GOTERM_BP_FAT	GO:0060993~kidney morphogenesis	5	1.46199	0.0747625	ENSG00000005073, ENSG00000112715, ENSG00000171791, ENSG00000177508, ENSG00000136997	282	94	16650	3.14056	1	1	0.991488
GOTERM_BP_FAT	GO:0046545~development of primary female sexual characteristics	5	1.46199	0.0747625	ENSG00000112715, ENSG00000171791, ENSG00000123999, ENSG00000136997, ENSG00000143355	282	94	16650	3.14056	1	1	0.991488
GOTERM_BP_FAT	GO:0045137~development of primary sexual characteristics	8	2.33918	0.0769112	ENSG00000005073, ENSG00000112715, ENSG00000171791, ENSG00000123999, ENSG00000129194, ENSG00000100918, ENSG00000136997, ENSG00000143355	282	218	16650	2.1667	1	1	0.991488
GOTERM_BP_FAT	GO:0061326~renal tubule development	5	1.46199	0.0770653	ENSG00000005073, ENSG00000112715, ENSG00000171791, ENSG00000177508, ENSG00000136997	282	95	16650	3.1075	1	1	0.991488
GOTERM_BP_FAT	GO:0060562~epithelial tube morphogenesis	10	2.92398	0.0792149	ENSG00000103241, ENSG00000005073, ENSG00000112715, ENSG00000183072, ENSG00000171791, ENSG00000204435, ENSG00000180340, ENSG00000177508, ENSG00000136997, ENSG00000166823	282	309	16650	1.91076	1	1	0.991488
GOTERM_BP_FAT	GO:0008584~male gonad development	6	1.75439	0.0806861	ENSG00000005073, ENSG00000171791, ENSG00000123999, ENSG00000129194, ENSG00000100918, ENSG00000143355	282	136	16650	2.60482	1	1	0.991488
GOTERM_BP_FAT	GO:0046546~development of primary male sexual characteristics	6	1.75439	0.0806861	ENSG00000005073, ENSG00000171791, ENSG00000123999, ENSG00000129194, ENSG00000100918, ENSG00000143355	282	136	16650	2.60482	1	1	0.991488
GOTERM_BP_FAT	GO:0001822~kidney development	9	2.63158	0.0844182	ENSG00000005073, ENSG00000112715, ENSG00000166147, ENSG00000171791, ENSG00000123388, ENSG00000117724, ENSG00000144891, ENSG00000177508, ENSG00000136997	282	267	16650	1.9902	1	1	0.991488
GOTERM_BP_FAT	GO:0060675~ureteric bud morphogenesis	4	1.16959	0.0936943	ENSG00000005073, ENSG00000112715, ENSG00000171791, ENSG00000136997	282	64	16650	3.69016	1	1	0.991488
GOTERM_BP_FAT	GO:0072171~mesonephric tubule morphogenesis	4	1.16959	0.0970633	ENSG00000005073, ENSG00000112715, ENSG00000171791, ENSG00000136997	282	65	16650	3.63339	1	1	0.991488
GOTERM_BP_FAT	GO:0048608~reproductive structure development	12	3.50877	0.0981344	ENSG00000137273, ENSG00000165474, ENSG00000005073, ENSG00000112715, ENSG00000171791, ENSG00000123999, ENSG00000112559, ENSG00000128714, ENSG00000129194, ENSG00000100918, ENSG00000136997, ENSG00000143355	282	418	16650	1.695	1	1	0.991488
GOTERM_BP_FAT	GO:0061458~reproductive system development	12	3.50877	0.103934	ENSG00000137273, ENSG00000165474, ENSG00000005073, ENSG00000112715, ENSG00000171791, ENSG00000123999, ENSG00000112559, ENSG00000128714, ENSG00000129194, ENSG00000100918, ENSG00000136997, ENSG00000143355	282	423	16650	1.67497	1	1	0.991488
GOTERM_BP_FAT	GO:0002009~morphogenesis of an epithelium	14	4.09357	0.104128	ENSG00000103241, ENSG00000112715, ENSG00000180340, ENSG00000171791, ENSG00000177508, ENSG00000136997, ENSG00000164066, ENSG00000137273, ENSG00000175707, ENSG00000005073, ENSG00000183072, ENSG00000204435, ENSG00000128714, ENSG00000166823	282	521	16650	1.58656	1	1	0.991488
GOTERM_BP_FAT	GO:0048729~tissue morphogenesis	16	4.67836	0.105642	ENSG00000103241, ENSG00000112715, ENSG00000180340, ENSG00000171791, ENSG00000157168, ENSG00000177508, ENSG00000136997, ENSG00000164066, ENSG00000137273, ENSG00000175707, ENSG00000005073, ENSG00000183072, ENSG00000204435, ENSG00000128714, ENSG00000162367, ENSG00000166823	282	622	16650	1.51878	1	1	0.991488
GOTERM_BP_FAT	GO:0046660~female sex differentiation	5	1.46199	0.110107	ENSG00000112715, ENSG00000171791, ENSG00000123999, ENSG00000136997, ENSG00000143355	282	108	16650	2.73345	1	1	0.991488
GOTERM_BP_FAT	GO:0072009~nephron epithelium development	5	1.46199	0.118506	ENSG00000005073, ENSG00000112715, ENSG00000171791, ENSG00000177508, ENSG00000136997	282	111	16650	2.65957	1	1	0.991488
GOTERM_BP_FAT	GO:0003006~developmental process involved in reproduction	16	4.67836	0.122342	ENSG00000112715, ENSG00000171791, ENSG00000112559, ENSG00000129194, ENSG00000076242, ENSG00000100918, ENSG00000136997, ENSG00000137273, ENSG00000005073, ENSG00000165474, ENSG00000123999, ENSG00000120899, ENSG00000184792, ENSG00000128714, ENSG00000142700, ENSG00000143355	282	636	16650	1.48535	1	1	0.991488
GOTERM_BP_FAT	GO:2000027~regulation of organ morphogenesis	8	2.33918	0.135386	ENSG00000005073, ENSG00000112715, ENSG00000171791, ENSG00000180340, ENSG00000128714, ENSG00000123388, ENSG00000136997, ENSG00000166823	282	252	16650	1.87437	1	1	0.991488
GOTERM_BP_FAT	GO:0022602~ovulation cycle process	4	1.16959	0.156916	ENSG00000112715, ENSG00000171791, ENSG00000123999, ENSG00000136997	282	81	16650	2.91568	1	1	0.991488
GOTERM_BP_FAT	GO:0061138~morphogenesis of a branching epithelium	6	1.75439	0.180583	ENSG00000103241, ENSG00000005073, ENSG00000112715, ENSG00000171791, ENSG00000128714, ENSG00000136997	282	177	16650	2.00144	1	1	0.991488
GOTERM_BP_FAT	GO:0072006~nephron development	5	1.46199	0.204802	ENSG00000005073, ENSG00000112715, ENSG00000171791, ENSG00000177508, ENSG00000136997	282	138	16650	2.13922	1	1	0.991488
GOTERM_BP_FAT	GO:0072073~kidney epithelium development	5	1.46199	0.222472	ENSG00000005073, ENSG00000112715, ENSG00000171791, ENSG00000177508, ENSG00000136997	282	143	16650	2.06442	1	1	0.991488
GOTERM_BP_FAT	GO:0001657~ureteric bud development	4	1.16959	0.225152	ENSG00000005073, ENSG00000112715, ENSG00000171791, ENSG00000136997	282	97	16650	2.43474	1	1	0.991488
GOTERM_BP_FAT	GO:0072163~mesonephric epithelium development	4	1.16959	0.229604	ENSG00000005073, ENSG00000112715, ENSG00000171791, ENSG00000136997	282	98	16650	2.4099	1	1	0.991488
GOTERM_BP_FAT	GO:0072164~mesonephric tubule development	4	1.16959	0.229604	ENSG00000005073, ENSG00000112715, ENSG00000171791, ENSG00000136997	282	98	16650	2.4099	1	1	0.991488
GOTERM_BP_FAT	GO:0001763~morphogenesis of a branching structure	6	1.75439	0.233907	ENSG00000103241, ENSG00000005073, ENSG00000112715, ENSG00000171791, ENSG00000128714, ENSG00000136997	282	195	16650	1.81669	1	1	0.991488
GOTERM_BP_FAT	GO:0048754~branching morphogenesis of an epithelial tube	5	1.46199	0.236887	ENSG00000103241, ENSG00000005073, ENSG00000112715, ENSG00000171791, ENSG00000136997	282	147	16650	2.00825	1	1	0.991488
GOTERM_BP_FAT	GO:0060429~epithelium development	22	6.43275	0.251475	ENSG00000103241, ENSG00000112715, ENSG00000213694, ENSG00000130700, ENSG00000180340, ENSG00000092621, ENSG00000171791, ENSG00000109705, ENSG00000110723, ENSG00000157168, ENSG00000177508, ENSG00000136997, ENSG00000171700, ENSG00000164066, ENSG00000137273, ENSG00000175707, ENSG00000005073, ENSG00000183072, ENSG00000204435, ENSG00000128714, ENSG00000069482, ENSG00000166823	282	1060	16650	1.22541	1	1	0.991488
GOTERM_BP_FAT	GO:0001823~mesonephros development	4	1.16959	0.252091	ENSG00000005073, ENSG00000112715, ENSG00000171791, ENSG00000136997	282	103	16650	2.29291	1	1	0.991488
GOTERM_BP_FAT	GO:0042698~ovulation cycle	4	1.16959	0.261176	ENSG00000112715, ENSG00000171791, ENSG00000123999, ENSG00000136997	282	105	16650	2.24924	1	1	0.991488
GOTERM_BP_FAT	GO:0048732~gland development	10	2.92398	0.283735	ENSG00000103241, ENSG00000112715, ENSG00000183072, ENSG00000126561, ENSG00000171791, ENSG00000128714, ENSG00000100300, ENSG00000157168, ENSG00000136997, ENSG00000166823	282	421	16650	1.40244	1	1	0.991488
GOTERM_BP_FAT	GO:0048511~rhythmic process	7	2.04678	0.431524	ENSG00000112715, ENSG00000132326, ENSG00000171791, ENSG00000123999, ENSG00000170485, ENSG00000005339, ENSG00000136997	282	312	16650	1.32467	1	1	0.991488
GOTERM_BP_FAT	GO:0048872~homeostasis of number of cells	5	1.46199	0.522516	ENSG00000112715, ENSG00000171791, ENSG00000123999, ENSG00000160710, ENSG00000162367	282	224	16650	1.31791	1	1	0.991488
Annotation Cluster 16	Enrichment Score: 1.169069525876352
Category	Term	Count	%	PValue	Genes	List Total	Pop Hits	Pop Total	Fold Enrichment	Bonferroni	Benjamini	FDR
GOTERM_BP_FAT	GO:0042127~regulation of cell proliferation	39	11.4035	0.0125764	ENSG00000154640, ENSG00000213024, ENSG00000103490, ENSG00000215788, ENSG00000197696, ENSG00000120949, ENSG00000136997, ENSG00000003402, ENSG00000183072, ENSG00000120899, ENSG00000204435, ENSG00000055332, ENSG00000128714, ENSG00000149599, ENSG00000100300, ENSG00000142700, ENSG00000197381, ENSG00000103241, ENSG00000112715, ENSG00000116819, ENSG00000213694, ENSG00000132326, ENSG00000126561, ENSG0000…	282	1552	16650	1.48367	1	0.63584	0.630283
GOTERM_BP_FAT	GO:0008285~negative regulation of cell proliferation	19	5.55556	0.0281336	ENSG00000197381, ENSG00000132326, ENSG00000154640, ENSG00000213024, ENSG00000171791, ENSG00000120949, ENSG00000139874, ENSG00000136997, ENSG00000138028, ENSG00000164066, ENSG00000175707, ENSG00000120899, ENSG00000204435, ENSG00000164362, ENSG00000055332, ENSG00000146674, ENSG00000100300, ENSG00000069482, ENSG00000169418	282	651	16650	1.72321	1	0.924946	0.916862
GOTERM_BP_FAT	GO:0008283~cell proliferation	38	11.1111	0.164935	ENSG00000154640, ENSG00000213024, ENSG00000103490, ENSG00000197696, ENSG00000120949, ENSG00000081479, ENSG00000136997, ENSG00000003402, ENSG00000171812, ENSG00000183072, ENSG00000120899, ENSG00000204435, ENSG00000055332, ENSG00000100300, ENSG00000161800, ENSG00000142700, ENSG00000143355, ENSG00000197381, ENSG00000163808, ENSG00000103241, ENSG00000112715, ENSG00000213694, ENSG00000132326, ENSG0000…	282	1861	16650	1.2056	1	1	0.991488
GOTERM_BP_FAT	GO:0008284~positive regulation of cell proliferation	17	4.97076	0.3611	ENSG00000103241, ENSG00000112715, ENSG00000213694, ENSG00000126561, ENSG00000103490, ENSG00000171791, ENSG00000197696, ENSG00000129194, ENSG00000157168, ENSG00000136997, ENSG00000183072, ENSG00000102878, ENSG00000120899, ENSG00000089116, ENSG00000164362, ENSG00000100300, ENSG00000142700	282	849	16650	1.18224	1	1	0.991488
Annotation Cluster 17	Enrichment Score: 1.1336621351183596
Category	Term	Count	%	PValue	Genes	List Total	Pop Hits	Pop Total	Fold Enrichment	Bonferroni	Benjamini	FDR
GOTERM_BP_FAT	GO:1903305~regulation of regulated secretory pathway	7	2.04678	0.0161654	ENSG00000047621, ENSG00000103241, ENSG00000213023, ENSG00000183186, ENSG00000158445, ENSG00000139973, ENSG00000159842	282	120	16650	3.44415	1	0.727378	0.721021
GOTERM_BP_FAT	GO:0051046~regulation of secretion	20	5.84795	0.0228803	ENSG00000047621, ENSG00000103241, ENSG00000213023, ENSG00000132326, ENSG00000103490, ENSG00000110723, ENSG00000197696, ENSG00000157168, ENSG00000158445, ENSG00000139973, ENSG00000159842, ENSG00000166313, ENSG00000170837, ENSG00000183186, ENSG00000123999, ENSG00000169992, ENSG00000144891, ENSG00000270885, ENSG00000069482, ENSG00000169418	282	683	16650	1.72892	1	0.835998	0.828691
GOTERM_BP_FAT	GO:0017157~regulation of exocytosis	8	2.33918	0.0300185	ENSG00000047621, ENSG00000103241, ENSG00000213023, ENSG00000183186, ENSG00000110723, ENSG00000158445, ENSG00000139973, ENSG00000159842	282	176	16650	2.68375	1	0.945801	0.937535
GOTERM_BP_FAT	GO:1903530~regulation of secretion by cell	17	4.97076	0.0687176	ENSG00000047621, ENSG00000103241, ENSG00000213023, ENSG00000132326, ENSG00000103490, ENSG00000110723, ENSG00000197696, ENSG00000158445, ENSG00000139973, ENSG00000159842, ENSG00000166313, ENSG00000170837, ENSG00000183186, ENSG00000123999, ENSG00000169992, ENSG00000270885, ENSG00000069482	282	630	16650	1.59321	1	1	0.991488
GOTERM_BP_FAT	GO:0060627~regulation of vesicle-mediated transport	13	3.80117	0.0793949	ENSG00000047621, ENSG00000103241, ENSG00000112715, ENSG00000213023, ENSG00000103490, ENSG00000065882, ENSG00000110723, ENSG00000158445, ENSG00000139973, ENSG00000159842, ENSG00000137312, ENSG00000183186, ENSG00000180447	282	449	16650	1.70947	1	1	0.991488
GOTERM_BP_FAT	GO:0006887~exocytosis	12	3.50877	0.080916	ENSG00000047621, ENSG00000103241, ENSG00000112715, ENSG00000213023, ENSG00000104863, ENSG00000183186, ENSG00000110723, ENSG00000106538, ENSG00000029534, ENSG00000158445, ENSG00000139973, ENSG00000159842	282	404	16650	1.75374	1	1	0.991488
GOTERM_BP_FAT	GO:0045055~regulated exocytosis	9	2.63158	0.11578	ENSG00000047621, ENSG00000103241, ENSG00000112715, ENSG00000213023, ENSG00000183186, ENSG00000106538, ENSG00000158445, ENSG00000139973, ENSG00000159842	282	288	16650	1.84508	1	1	0.991488
GOTERM_BP_FAT	GO:0032940~secretion by cell	21	6.14035	0.201187	ENSG00000047621, ENSG00000103241, ENSG00000112715, ENSG00000213023, ENSG00000132326, ENSG00000104863, ENSG00000103490, ENSG00000110723, ENSG00000197696, ENSG00000106538, ENSG00000029534, ENSG00000158445, ENSG00000139973, ENSG00000159842, ENSG00000166313, ENSG00000170837, ENSG00000183186, ENSG00000123999, ENSG00000169992, ENSG00000270885, ENSG00000069482	282	966	16650	1.28353	1	1	0.991488
GOTERM_BP_FAT	GO:0016192~vesicle-mediated transport	26	7.60234	0.548877	ENSG00000047621, ENSG00000214357, ENSG00000213023, ENSG00000104863, ENSG00000103490, ENSG00000115318, ENSG00000110723, ENSG00000029534, ENSG00000081479, ENSG00000158445, ENSG00000138131, ENSG00000161800, ENSG00000180447, ENSG00000163808, ENSG00000103241, ENSG00000112715, ENSG00000065882, ENSG00000106538, ENSG00000158156, ENSG00000139973, ENSG00000159842, ENSG00000066735, ENSG00000137312, ENSG0000…	282	1494	16650	1.02751	1	1	0.991488
Annotation Cluster 18	Enrichment Score: 1.070441478079524
Category	Term	Count	%	PValue	Genes	List Total	Pop Hits	Pop Total	Fold Enrichment	Bonferroni	Benjamini	FDR
GOTERM_BP_FAT	GO:0030334~regulation of cell migration	21	6.14035	0.0124503	ENSG00000197381, ENSG00000158747, ENSG00000103241, ENSG00000112715, ENSG00000126561, ENSG00000103490, ENSG00000171791, ENSG00000106538, ENSG00000133067, ENSG00000137135, ENSG00000157168, ENSG00000136997, ENSG00000159842, ENSG00000185070, ENSG00000120899, ENSG00000204435, ENSG00000164362, ENSG00000179051, ENSG00000146674, ENSG00000180921, ENSG00000107201	282	685	16650	1.81006	1	0.63584	0.630283
GOTERM_BP_FAT	GO:2000145~regulation of cell motility	21	6.14035	0.0255211	ENSG00000197381, ENSG00000158747, ENSG00000103241, ENSG00000112715, ENSG00000126561, ENSG00000103490, ENSG00000171791, ENSG00000106538, ENSG00000133067, ENSG00000137135, ENSG00000157168, ENSG00000136997, ENSG00000159842, ENSG00000185070, ENSG00000120899, ENSG00000204435, ENSG00000164362, ENSG00000179051, ENSG00000146674, ENSG00000180921, ENSG00000107201	282	736	16650	1.68464	1	0.881017	0.873317
GOTERM_BP_FAT	GO:0051270~regulation of cellular component movement	22	6.43275	0.0311324	ENSG00000197381, ENSG00000158747, ENSG00000103241, ENSG00000112715, ENSG00000126561, ENSG00000103490, ENSG00000171791, ENSG00000106538, ENSG00000133067, ENSG00000137135, ENSG00000157168, ENSG00000136997, ENSG00000159842, ENSG00000185070, ENSG00000169126, ENSG00000120899, ENSG00000204435, ENSG00000164362, ENSG00000179051, ENSG00000146674, ENSG00000180921, ENSG00000107201	282	802	16650	1.61962	1	0.966883	0.958433
GOTERM_BP_FAT	GO:0040012~regulation of locomotion	21	6.14035	0.0370616	ENSG00000197381, ENSG00000158747, ENSG00000103241, ENSG00000112715, ENSG00000126561, ENSG00000103490, ENSG00000171791, ENSG00000106538, ENSG00000133067, ENSG00000137135, ENSG00000157168, ENSG00000136997, ENSG00000159842, ENSG00000185070, ENSG00000120899, ENSG00000204435, ENSG00000164362, ENSG00000179051, ENSG00000146674, ENSG00000180921, ENSG00000107201	282	768	16650	1.61444	1	1	0.991488
GOTERM_BP_FAT	GO:0030335~positive regulation of cell migration	12	3.50877	0.0724135	ENSG00000103241, ENSG00000112715, ENSG00000126561, ENSG00000103490, ENSG00000171791, ENSG00000120899, ENSG00000164362, ENSG00000106538, ENSG00000133067, ENSG00000137135, ENSG00000136997, ENSG00000180921	282	395	16650	1.7937	1	1	0.991488
GOTERM_BP_FAT	GO:0006928~movement of cell or subcellular component	39	11.4035	0.0841251	ENSG00000158747, ENSG00000099864, ENSG00000103490, ENSG00000133067, ENSG00000136997, ENSG00000112144, ENSG00000185070, ENSG00000169126, ENSG00000120899, ENSG00000204435, ENSG00000162512, ENSG00000100300, ENSG00000161800, ENSG00000079308, ENSG00000180921, ENSG00000184922, ENSG00000143355, ENSG00000197381, ENSG00000163808, ENSG00000103241, ENSG00000112715, ENSG00000154134, ENSG00000126561, ENSG0000…	282	1795	16650	1.28282	1	1	0.991488
GOTERM_BP_FAT	GO:2000147~positive regulation of cell motility	12	3.50877	0.0872639	ENSG00000103241, ENSG00000112715, ENSG00000126561, ENSG00000103490, ENSG00000171791, ENSG00000120899, ENSG00000164362, ENSG00000106538, ENSG00000133067, ENSG00000137135, ENSG00000136997, ENSG00000180921	282	409	16650	1.7323	1	1	0.991488
GOTERM_BP_FAT	GO:0051272~positive regulation of cellular component movement	12	3.50877	0.0985978	ENSG00000103241, ENSG00000112715, ENSG00000126561, ENSG00000103490, ENSG00000171791, ENSG00000120899, ENSG00000164362, ENSG00000106538, ENSG00000133067, ENSG00000137135, ENSG00000136997, ENSG00000180921	282	420	16650	1.68693	1	1	0.991488
GOTERM_BP_FAT	GO:0040017~positive regulation of locomotion	12	3.50877	0.103157	ENSG00000103241, ENSG00000112715, ENSG00000126561, ENSG00000103490, ENSG00000171791, ENSG00000120899, ENSG00000164362, ENSG00000106538, ENSG00000133067, ENSG00000137135, ENSG00000136997, ENSG00000180921	282	422	16650	1.67894	1	1	0.991488
GOTERM_BP_FAT	GO:0016477~cell migration	26	7.60234	0.147746	ENSG00000158747, ENSG00000103490, ENSG00000133067, ENSG00000136997, ENSG00000185070, ENSG00000120899, ENSG00000204435, ENSG00000162512, ENSG00000100300, ENSG00000079308, ENSG00000180921, ENSG00000184922, ENSG00000197381, ENSG00000103241, ENSG00000112715, ENSG00000126561, ENSG00000171791, ENSG00000106538, ENSG00000137135, ENSG00000157168, ENSG00000159842, ENSG00000164362, ENSG00000179051, ENSG0000…	282	1184	16650	1.29654	1	1	0.991488
GOTERM_BP_FAT	GO:0040011~locomotion	32	9.35673	0.164345	ENSG00000158747, ENSG00000103490, ENSG00000133067, ENSG00000136997, ENSG00000185070, ENSG00000089505, ENSG00000120899, ENSG00000204435, ENSG00000162512, ENSG00000100300, ENSG00000079308, ENSG00000180921, ENSG00000184922, ENSG00000143355, ENSG00000197381, ENSG00000103241, ENSG00000112715, ENSG00000154134, ENSG00000126561, ENSG00000174684, ENSG00000171791, ENSG00000106538, ENSG00000137135, ENSG0000…	282	1530	16650	1.23488	1	1	0.991488
GOTERM_BP_FAT	GO:0048870~cell motility	27	7.89474	0.243713	ENSG00000158747, ENSG00000103490, ENSG00000133067, ENSG00000136997, ENSG00000185070, ENSG00000120899, ENSG00000204435, ENSG00000162512, ENSG00000100300, ENSG00000079308, ENSG00000180921, ENSG00000184922, ENSG00000197381, ENSG00000103241, ENSG00000112715, ENSG00000126561, ENSG00000171791, ENSG00000106538, ENSG00000137135, ENSG00000157168, ENSG00000159842, ENSG00000164362, ENSG00000179051, ENSG0000…	282	1330	16650	1.19861	1	1	0.991488
GOTERM_BP_FAT	GO:0051674~localization of cell	27	7.89474	0.243713	ENSG00000158747, ENSG00000103490, ENSG00000133067, ENSG00000136997, ENSG00000185070, ENSG00000120899, ENSG00000204435, ENSG00000162512, ENSG00000100300, ENSG00000079308, ENSG00000180921, ENSG00000184922, ENSG00000197381, ENSG00000103241, ENSG00000112715, ENSG00000126561, ENSG00000171791, ENSG00000106538, ENSG00000137135, ENSG00000157168, ENSG00000159842, ENSG00000164362, ENSG00000179051, ENSG0000…	282	1330	16650	1.19861	1	1	0.991488
GOTERM_BP_FAT	GO:0008284~positive regulation of cell proliferation	17	4.97076	0.3611	ENSG00000103241, ENSG00000112715, ENSG00000213694, ENSG00000126561, ENSG00000103490, ENSG00000171791, ENSG00000197696, ENSG00000129194, ENSG00000157168, ENSG00000136997, ENSG00000183072, ENSG00000102878, ENSG00000120899, ENSG00000089116, ENSG00000164362, ENSG00000100300, ENSG00000142700	282	849	16650	1.18224	1	1	0.991488
Annotation Cluster 19	Enrichment Score: 1.060476133063105
Category	Term	Count	%	PValue	Genes	List Total	Pop Hits	Pop Total	Fold Enrichment	Bonferroni	Benjamini	FDR
GOTERM_BP_FAT	GO:0001759~organ induction	3	0.877193	0.0441596	ENSG00000005073, ENSG00000123388, ENSG00000166823	282	20	16650	8.85638	1	1	0.991488
GOTERM_BP_FAT	GO:0048645~organ formation	4	1.16959	0.0776129	ENSG00000005073, ENSG00000109705, ENSG00000123388, ENSG00000166823	282	59	16650	4.00288	1	1	0.991488
GOTERM_BP_FAT	GO:0031128~developmental induction	3	0.877193	0.0958947	ENSG00000005073, ENSG00000123388, ENSG00000166823	282	31	16650	5.7138	1	1	0.991488
GOTERM_BP_FAT	GO:0003156~regulation of organ formation	3	0.877193	0.112019	ENSG00000005073, ENSG00000123388, ENSG00000166823	282	34	16650	5.20964	1	1	0.991488
GOTERM_BP_FAT	GO:2000027~regulation of organ morphogenesis	8	2.33918	0.135386	ENSG00000005073, ENSG00000112715, ENSG00000171791, ENSG00000180340, ENSG00000128714, ENSG00000123388, ENSG00000136997, ENSG00000166823	282	252	16650	1.87437	1	1	0.991488
Annotation Cluster 20	Enrichment Score: 1.0291938748003533
Category	Term	Count	%	PValue	Genes	List Total	Pop Hits	Pop Total	Fold Enrichment	Bonferroni	Benjamini	FDR
GOTERM_BP_FAT	GO:2000573~positive regulation of DNA biosynthetic process	5	1.46199	0.0155784	ENSG00000102977, ENSG00000120899, ENSG00000181085, ENSG00000136997, ENSG00000127586	282	57	16650	5.17917	1	0.727378	0.721021
GOTERM_BP_FAT	GO:2000278~regulation of DNA biosynthetic process	5	1.46199	0.0724952	ENSG00000102977, ENSG00000120899, ENSG00000181085, ENSG00000136997, ENSG00000127586	282	93	16650	3.17433	1	1	0.991488
GOTERM_BP_FAT	GO:0051973~positive regulation of telomerase activity	3	0.877193	0.085555	ENSG00000102977, ENSG00000181085, ENSG00000136997	282	29	16650	6.10785	1	1	0.991488
GOTERM_BP_FAT	GO:0051054~positive regulation of DNA metabolic process	7	2.04678	0.127674	ENSG00000166313, ENSG00000102977, ENSG00000120899, ENSG00000181085, ENSG00000170485, ENSG00000136997, ENSG00000127586	282	202	16650	2.04603	1	1	0.991488
GOTERM_BP_FAT	GO:0051972~regulation of telomerase activity	3	0.877193	0.169816	ENSG00000102977, ENSG00000181085, ENSG00000136997	282	44	16650	4.02563	1	1	0.991488
GOTERM_BP_FAT	GO:0032204~regulation of telomere maintenance	3	0.877193	0.318917	ENSG00000102977, ENSG00000181085, ENSG00000136997	282	68	16650	2.60482	1	1	0.991488
Annotation Cluster 21	Enrichment Score: 1.0215604179690343
Category	Term	Count	%	PValue	Genes	List Total	Pop Hits	Pop Total	Fold Enrichment	Bonferroni	Benjamini	FDR
GOTERM_BP_FAT	GO:0006220~pyrimidine nucleotide metabolic process	4	1.16959	0.0471498	ENSG00000103202, ENSG00000154027, ENSG00000140398, ENSG00000128951	282	48	16650	4.92021	1	1	0.991488
GOTERM_BP_FAT	GO:0009394~2'-deoxyribonucleotide metabolic process	3	0.877193	0.090681	ENSG00000154027, ENSG00000140398, ENSG00000128951	282	30	16650	5.90426	1	1	0.991488
GOTERM_BP_FAT	GO:0019692~deoxyribose phosphate metabolic process	3	0.877193	0.101192	ENSG00000154027, ENSG00000140398, ENSG00000128951	282	32	16650	5.53524	1	1	0.991488
GOTERM_BP_FAT	GO:0009262~deoxyribonucleotide metabolic process	3	0.877193	0.112019	ENSG00000154027, ENSG00000140398, ENSG00000128951	282	34	16650	5.20964	1	1	0.991488
GOTERM_BP_FAT	GO:0072527~pyrimidine-containing compound metabolic process	4	1.16959	0.160978	ENSG00000103202, ENSG00000154027, ENSG00000140398, ENSG00000128951	282	82	16650	2.88012	1	1	0.991488
Annotation Cluster 22	Enrichment Score: 0.9988860236412745
Category	Term	Count	%	PValue	Genes	List Total	Pop Hits	Pop Total	Fold Enrichment	Bonferroni	Benjamini	FDR
GOTERM_BP_FAT	GO:0001523~retinoid metabolic process	5	1.46199	0.0637865	ENSG00000187553, ENSG00000106538, ENSG00000162512, ENSG00000081479, ENSG00000114115	282	89	16650	3.317	1	1	0.991488
GOTERM_BP_FAT	GO:0006720~isoprenoid metabolic process	6	1.75439	0.065885	ENSG00000120697, ENSG00000187553, ENSG00000106538, ENSG00000162512, ENSG00000081479, ENSG00000114115	282	128	16650	2.76762	1	1	0.991488
GOTERM_BP_FAT	GO:0016101~diterpenoid metabolic process	5	1.46199	0.0794034	ENSG00000187553, ENSG00000106538, ENSG00000162512, ENSG00000081479, ENSG00000114115	282	96	16650	3.07513	1	1	0.991488
GOTERM_BP_FAT	GO:0006721~terpenoid metabolic process	5	1.46199	0.104663	ENSG00000187553, ENSG00000106538, ENSG00000162512, ENSG00000081479, ENSG00000114115	282	106	16650	2.78503	1	1	0.991488
GOTERM_BP_FAT	GO:0006775~fat-soluble vitamin metabolic process	3	0.877193	0.157863	ENSG00000187553, ENSG00000081479, ENSG00000114115	282	42	16650	4.21733	1	1	0.991488
GOTERM_BP_FAT	GO:0006766~vitamin metabolic process	5	1.46199	0.184187	ENSG00000166126, ENSG00000147813, ENSG00000187553, ENSG00000081479, ENSG00000114115	282	132	16650	2.23646	1	1	0.991488
Annotation Cluster 23	Enrichment Score: 0.993353380334314
Category	Term	Count	%	PValue	Genes	List Total	Pop Hits	Pop Total	Fold Enrichment	Bonferroni	Benjamini	FDR
GOTERM_BP_FAT	GO:0014009~glial cell proliferation	4	1.16959	0.0164392	ENSG00000120899, ENSG00000164362, ENSG00000100300, ENSG00000136997	282	32	16650	7.38032	1	0.727378	0.721021
GOTERM_BP_FAT	GO:0060251~regulation of glial cell proliferation	3	0.877193	0.0614042	ENSG00000164362, ENSG00000100300, ENSG00000136997	282	24	16650	7.38032	1	1	0.991488
GOTERM_BP_FAT	GO:0042063~gliogenesis	7	2.04678	0.222746	ENSG00000092621, ENSG00000120899, ENSG00000164362, ENSG00000100300, ENSG00000157168, ENSG00000136997, ENSG00000162367	282	240	16650	1.72207	1	1	0.991488
GOTERM_BP_FAT	GO:0014013~regulation of gliogenesis	3	0.877193	0.472822	ENSG00000164362, ENSG00000100300, ENSG00000136997	282	94	16650	1.88434	1	1	0.991488
Annotation Cluster 24	Enrichment Score: 0.9726798052106058
Category	Term	Count	%	PValue	Genes	List Total	Pop Hits	Pop Total	Fold Enrichment	Bonferroni	Benjamini	FDR
GOTERM_BP_FAT	GO:0002495~antigen processing and presentation of peptide antigen via MHC class II	6	1.75439	0.0232883	ENSG00000163808, ENSG00000145416, ENSG00000138160, ENSG00000103490, ENSG00000161800, ENSG00000066735	282	96	16650	3.69016	1	0.838468	0.83114
GOTERM_BP_FAT	GO:0002504~antigen processing and presentation of peptide or polysaccharide antigen via MHC class II	6	1.75439	0.0261776	ENSG00000163808, ENSG00000145416, ENSG00000138160, ENSG00000103490, ENSG00000161800, ENSG00000066735	282	99	16650	3.57834	1	0.896222	0.888389
GOTERM_BP_FAT	GO:0048002~antigen processing and presentation of peptide antigen	8	2.33918	0.0323788	ENSG00000163808, ENSG00000145416, ENSG00000138160, ENSG00000204642, ENSG00000103490, ENSG00000204267, ENSG00000161800, ENSG00000066735	282	179	16650	2.63877	1	0.984497	0.975893
GOTERM_BP_FAT	GO:0019882~antigen processing and presentation	8	2.33918	0.090666	ENSG00000163808, ENSG00000145416, ENSG00000138160, ENSG00000204642, ENSG00000103490, ENSG00000204267, ENSG00000161800, ENSG00000066735	282	227	16650	2.08079	1	1	0.991488
GOTERM_BP_FAT	GO:0002478~antigen processing and presentation of exogenous peptide antigen	6	1.75439	0.139612	ENSG00000163808, ENSG00000138160, ENSG00000204642, ENSG00000204267, ENSG00000161800, ENSG00000066735	282	162	16650	2.18676	1	1	0.991488
GOTERM_BP_FAT	GO:0019884~antigen processing and presentation of exogenous antigen	6	1.75439	0.158066	ENSG00000163808, ENSG00000138160, ENSG00000204642, ENSG00000204267, ENSG00000161800, ENSG00000066735	282	169	16650	2.09619	1	1	0.991488
GOTERM_BP_FAT	GO:0006890~retrograde vesicle-mediated transport, Golgi to ER	4	1.16959	0.160978	ENSG00000163808, ENSG00000138160, ENSG00000161800, ENSG00000066735	282	82	16650	2.88012	1	1	0.991488
GOTERM_BP_FAT	GO:0007018~microtubule-based movement	7	2.04678	0.183844	ENSG00000163808, ENSG00000169126, ENSG00000138160, ENSG00000237649, ENSG00000161800, ENSG00000066735, ENSG00000112144	282	226	16650	1.82875	1	1	0.991488
GOTERM_BP_FAT	GO:0019886~antigen processing and presentation of exogenous peptide antigen via MHC class II	4	1.16959	0.203172	ENSG00000163808, ENSG00000138160, ENSG00000161800, ENSG00000066735	282	92	16650	2.56707	1	1	0.991488
GOTERM_BP_FAT	GO:0048193~Golgi vesicle transport	5	1.46199	0.789928	ENSG00000163808, ENSG00000138160, ENSG00000029534, ENSG00000161800, ENSG00000066735	282	319	16650	0.925432	1	1	0.991488
Annotation Cluster 25	Enrichment Score: 0.9667517951265577
Category	Term	Count	%	PValue	Genes	List Total	Pop Hits	Pop Total	Fold Enrichment	Bonferroni	Benjamini	FDR
GOTERM_BP_FAT	GO:0033002~muscle cell proliferation	7	2.04678	0.0478825	ENSG00000183072, ENSG00000164362, ENSG00000146674, ENSG00000157168, ENSG00000136997, ENSG00000169418, ENSG00000003402	282	155	16650	2.66644	1	1	0.991488
GOTERM_BP_FAT	GO:0014910~regulation of smooth muscle cell migration	4	1.16959	0.0601135	ENSG00000171791, ENSG00000164362, ENSG00000146674, ENSG00000136997	282	53	16650	4.45604	1	1	0.991488
GOTERM_BP_FAT	GO:0014909~smooth muscle cell migration	4	1.16959	0.0715537	ENSG00000171791, ENSG00000164362, ENSG00000146674, ENSG00000136997	282	57	16650	4.14334	1	1	0.991488
GOTERM_BP_FAT	GO:0014911~positive regulation of smooth muscle cell migration	3	0.877193	0.0958947	ENSG00000171791, ENSG00000164362, ENSG00000136997	282	31	16650	5.7138	1	1	0.991488
GOTERM_BP_FAT	GO:0014812~muscle cell migration	4	1.16959	0.103946	ENSG00000171791, ENSG00000164362, ENSG00000146674, ENSG00000136997	282	67	16650	3.52493	1	1	0.991488
GOTERM_BP_FAT	GO:0048659~smooth muscle cell proliferation	4	1.16959	0.279465	ENSG00000164362, ENSG00000146674, ENSG00000136997, ENSG00000169418	282	109	16650	2.1667	1	1	0.991488
GOTERM_BP_FAT	GO:0048660~regulation of smooth muscle cell proliferation	4	1.16959	0.297869	ENSG00000164362, ENSG00000146674, ENSG00000136997, ENSG00000169418	282	113	16650	2.09	1	1	0.991488
Annotation Cluster 26	Enrichment Score: 0.9603464525851935
Category	Term	Count	%	PValue	Genes	List Total	Pop Hits	Pop Total	Fold Enrichment	Bonferroni	Benjamini	FDR
GOTERM_BP_FAT	GO:0051153~regulation of striated muscle cell differentiation	7	2.04678	0.00490178	ENSG00000112183, ENSG00000183072, ENSG00000171791, ENSG00000157168, ENSG00000003402, ENSG00000137312, ENSG00000166823	282	93	16650	4.44406	1	0.355216	0.352111
GOTERM_BP_FAT	GO:0051147~regulation of muscle cell differentiation	9	2.63158	0.00726415	ENSG00000112183, ENSG00000103241, ENSG00000183072, ENSG00000171791, ENSG00000146674, ENSG00000157168, ENSG00000003402, ENSG00000137312, ENSG00000166823	282	166	16650	3.2011	1	0.437563	0.433739
GOTERM_BP_FAT	GO:0010830~regulation of myotube differentiation	5	1.46199	0.0155784	ENSG00000112183, ENSG00000183072, ENSG00000171791, ENSG00000003402, ENSG00000137312	282	57	16650	5.17917	1	0.727378	0.721021
GOTERM_BP_FAT	GO:0061061~muscle structure development	17	4.97076	0.0422349	ENSG00000103241, ENSG00000112715, ENSG00000180340, ENSG00000171791, ENSG00000178860, ENSG00000129194, ENSG00000170175, ENSG00000117724, ENSG00000157168, ENSG00000003402, ENSG00000137312, ENSG00000112183, ENSG00000183072, ENSG00000184271, ENSG00000146674, ENSG00000142700, ENSG00000166823	282	589	16650	1.70411	1	1	0.991488
GOTERM_BP_FAT	GO:0042692~muscle cell differentiation	12	3.50877	0.0439885	ENSG00000112183, ENSG00000103241, ENSG00000112715, ENSG00000183072, ENSG00000171791, ENSG00000170175, ENSG00000129194, ENSG00000146674, ENSG00000157168, ENSG00000003402, ENSG00000137312, ENSG00000166823	282	362	16650	1.95721	1	1	0.991488
GOTERM_BP_FAT	GO:0016202~regulation of striated muscle tissue development	6	1.75439	0.0468077	ENSG00000183072, ENSG00000171791, ENSG00000129194, ENSG00000117724, ENSG00000157168, ENSG00000137312	282	116	16650	3.05393	1	1	0.991488
GOTERM_BP_FAT	GO:0048634~regulation of muscle organ development	6	1.75439	0.0497252	ENSG00000183072, ENSG00000171791, ENSG00000129194, ENSG00000117724, ENSG00000157168, ENSG00000137312	282	118	16650	3.00216	1	1	0.991488
GOTERM_BP_FAT	GO:1901861~regulation of muscle tissue development	6	1.75439	0.0512232	ENSG00000183072, ENSG00000171791, ENSG00000129194, ENSG00000117724, ENSG00000157168, ENSG00000137312	282	119	16650	2.97694	1	1	0.991488
GOTERM_BP_FAT	GO:0051146~striated muscle cell differentiation	9	2.63158	0.0621825	ENSG00000112183, ENSG00000112715, ENSG00000183072, ENSG00000171791, ENSG00000170175, ENSG00000157168, ENSG00000003402, ENSG00000137312, ENSG00000166823	282	250	16650	2.12553	1	1	0.991488
GOTERM_BP_FAT	GO:0051149~positive regulation of muscle cell differentiation	5	1.46199	0.0680683	ENSG00000171791, ENSG00000146674, ENSG00000157168, ENSG00000137312, ENSG00000166823	282	91	16650	3.2441	1	1	0.991488
GOTERM_BP_FAT	GO:0051155~positive regulation of striated muscle cell differentiation	4	1.16959	0.0715537	ENSG00000171791, ENSG00000157168, ENSG00000137312, ENSG00000166823	282	57	16650	4.14334	1	1	0.991488
GOTERM_BP_FAT	GO:0007517~muscle organ development	11	3.21637	0.0927264	ENSG00000183072, ENSG00000184271, ENSG00000171791, ENSG00000180340, ENSG00000178860, ENSG00000129194, ENSG00000117724, ENSG00000157168, ENSG00000142700, ENSG00000003402, ENSG00000137312	282	366	16650	1.7745	1	1	0.991488
GOTERM_BP_FAT	GO:0060537~muscle tissue development	11	3.21637	0.0938	ENSG00000112715, ENSG00000183072, ENSG00000171791, ENSG00000178860, ENSG00000129194, ENSG00000117724, ENSG00000157168, ENSG00000142700, ENSG00000003402, ENSG00000137312, ENSG00000166823	282	367	16650	1.76967	1	1	0.991488
GOTERM_BP_FAT	GO:0014706~striated muscle tissue development	10	2.92398	0.141732	ENSG00000112715, ENSG00000183072, ENSG00000171791, ENSG00000178860, ENSG00000129194, ENSG00000157168, ENSG00000142700, ENSG00000003402, ENSG00000137312, ENSG00000166823	282	350	16650	1.68693	1	1	0.991488
GOTERM_BP_FAT	GO:0055002~striated muscle cell development	5	1.46199	0.194409	ENSG00000112715, ENSG00000183072, ENSG00000171791, ENSG00000170175, ENSG00000003402	282	135	16650	2.18676	1	1	0.991488
GOTERM_BP_FAT	GO:0048747~muscle fiber development	3	0.877193	0.24383	ENSG00000112715, ENSG00000171791, ENSG00000170175	282	56	16650	3.16299	1	1	0.991488
GOTERM_BP_FAT	GO:0055001~muscle cell development	5	1.46199	0.24784	ENSG00000112715, ENSG00000183072, ENSG00000171791, ENSG00000170175, ENSG00000003402	282	150	16650	1.96809	1	1	0.991488
GOTERM_BP_FAT	GO:0014902~myotube differentiation	4	1.16959	0.270303	ENSG00000183072, ENSG00000171791, ENSG00000003402, ENSG00000137312	282	107	16650	2.2072	1	1	0.991488
GOTERM_BP_FAT	GO:0045844~positive regulation of striated muscle tissue development	3	0.877193	0.306466	ENSG00000171791, ENSG00000157168, ENSG00000137312	282	66	16650	2.68375	1	1	0.991488
GOTERM_BP_FAT	GO:0048636~positive regulation of muscle organ development	3	0.877193	0.306466	ENSG00000171791, ENSG00000157168, ENSG00000137312	282	66	16650	2.68375	1	1	0.991488
GOTERM_BP_FAT	GO:1901863~positive regulation of muscle tissue development	3	0.877193	0.312697	ENSG00000171791, ENSG00000157168, ENSG00000137312	282	67	16650	2.6437	1	1	0.991488
GOTERM_BP_FAT	GO:0007519~skeletal muscle tissue development	5	1.46199	0.323922	ENSG00000171791, ENSG00000178860, ENSG00000142700, ENSG00000003402, ENSG00000137312	282	170	16650	1.73655	1	1	0.991488
GOTERM_BP_FAT	GO:0060538~skeletal muscle organ development	5	1.46199	0.353798	ENSG00000171791, ENSG00000178860, ENSG00000142700, ENSG00000003402, ENSG00000137312	282	178	16650	1.6585	1	1	0.991488
GOTERM_BP_FAT	GO:0035265~organ growth	4	1.16959	0.412722	ENSG00000183072, ENSG00000171791, ENSG00000157168, ENSG00000166823	282	138	16650	1.71138	1	1	0.991488
GOTERM_BP_FAT	GO:0043393~regulation of protein binding	4	1.16959	0.580835	ENSG00000171791, ENSG00000164362, ENSG00000157168, ENSG00000137312	282	178	16650	1.3268	1	1	0.991488
GOTERM_BP_FAT	GO:0003012~muscle system process	5	1.46199	0.913735	ENSG00000183072, ENSG00000006704, ENSG00000172164, ENSG00000170175, ENSG00000003402	282	405	16650	0.72892	1	1	0.991488
Annotation Cluster 27	Enrichment Score: 0.9347627910533898
Category	Term	Count	%	PValue	Genes	List Total	Pop Hits	Pop Total	Fold Enrichment	Bonferroni	Benjamini	FDR
GOTERM_BP_FAT	GO:0048333~mesodermal cell differentiation	4	1.16959	0.0164392	ENSG00000103241, ENSG00000005073, ENSG00000162367, ENSG00000166823	282	32	16650	7.38032	1	0.727378	0.721021
GOTERM_BP_FAT	GO:0007498~mesoderm development	6	1.75439	0.0641513	ENSG00000103241, ENSG00000005073, ENSG00000112715, ENSG00000177508, ENSG00000162367, ENSG00000166823	282	127	16650	2.78941	1	1	0.991488
GOTERM_BP_FAT	GO:0001707~mesoderm formation	4	1.16959	0.111016	ENSG00000103241, ENSG00000005073, ENSG00000162367, ENSG00000166823	282	69	16650	3.42276	1	1	0.991488
GOTERM_BP_FAT	GO:0048332~mesoderm morphogenesis	4	1.16959	0.118265	ENSG00000103241, ENSG00000005073, ENSG00000162367, ENSG00000166823	282	71	16650	3.32634	1	1	0.991488
GOTERM_BP_FAT	GO:0001704~formation of primary germ layer	4	1.16959	0.320963	ENSG00000103241, ENSG00000005073, ENSG00000162367, ENSG00000166823	282	118	16650	2.00144	1	1	0.991488
GOTERM_BP_FAT	GO:0007369~gastrulation	4	1.16959	0.554162	ENSG00000103241, ENSG00000005073, ENSG00000162367, ENSG00000166823	282	172	16650	1.37308	1	1	0.991488
Annotation Cluster 28	Enrichment Score: 0.9100345589256345
Category	Term	Count	%	PValue	Genes	List Total	Pop Hits	Pop Total	Fold Enrichment	Bonferroni	Benjamini	FDR
GOTERM_BP_FAT	GO:0051153~regulation of striated muscle cell differentiation	7	2.04678	0.00490178	ENSG00000112183, ENSG00000183072, ENSG00000171791, ENSG00000157168, ENSG00000003402, ENSG00000137312, ENSG00000166823	282	93	16650	4.44406	1	0.355216	0.352111
GOTERM_BP_FAT	GO:0051147~regulation of muscle cell differentiation	9	2.63158	0.00726415	ENSG00000112183, ENSG00000103241, ENSG00000183072, ENSG00000171791, ENSG00000146674, ENSG00000157168, ENSG00000003402, ENSG00000137312, ENSG00000166823	282	166	16650	3.2011	1	0.437563	0.433739
GOTERM_BP_FAT	GO:0060485~mesenchyme development	10	2.92398	0.018147	ENSG00000137273, ENSG00000103241, ENSG00000183072, ENSG00000116670, ENSG00000187553, ENSG00000171791, ENSG00000115318, ENSG00000157168, ENSG00000136997, ENSG00000166823	282	234	16650	2.52319	1	0.758684	0.752054
GOTERM_BP_FAT	GO:0003161~cardiac conduction system development	3	0.877193	0.0195819	ENSG00000183072, ENSG00000157168, ENSG00000166823	282	13	16650	13.6252	1	0.781119	0.774292
GOTERM_BP_FAT	GO:0003231~cardiac ventricle development	6	1.75439	0.0497252	ENSG00000103241, ENSG00000183072, ENSG00000180340, ENSG00000081479, ENSG00000157168, ENSG00000166823	282	118	16650	3.00216	1	1	0.991488
GOTERM_BP_FAT	GO:0051146~striated muscle cell differentiation	9	2.63158	0.0621825	ENSG00000112183, ENSG00000112715, ENSG00000183072, ENSG00000171791, ENSG00000170175, ENSG00000157168, ENSG00000003402, ENSG00000137312, ENSG00000166823	282	250	16650	2.12553	1	1	0.991488
GOTERM_BP_FAT	GO:0060537~muscle tissue development	11	3.21637	0.0938	ENSG00000112715, ENSG00000183072, ENSG00000171791, ENSG00000178860, ENSG00000129194, ENSG00000117724, ENSG00000157168, ENSG00000142700, ENSG00000003402, ENSG00000137312, ENSG00000166823	282	367	16650	1.76967	1	1	0.991488
GOTERM_BP_FAT	GO:0003208~cardiac ventricle morphogenesis	4	1.16959	0.121955	ENSG00000103241, ENSG00000183072, ENSG00000157168, ENSG00000166823	282	72	16650	3.28014	1	1	0.991488
GOTERM_BP_FAT	GO:0003205~cardiac chamber development	6	1.75439	0.122214	ENSG00000103241, ENSG00000183072, ENSG00000180340, ENSG00000081479, ENSG00000157168, ENSG00000166823	282	155	16650	2.28552	1	1	0.991488
GOTERM_BP_FAT	GO:0003206~cardiac chamber morphogenesis	5	1.46199	0.139131	ENSG00000103241, ENSG00000183072, ENSG00000180340, ENSG00000157168, ENSG00000166823	282	118	16650	2.5018	1	1	0.991488
GOTERM_BP_FAT	GO:0014706~striated muscle tissue development	10	2.92398	0.141732	ENSG00000112715, ENSG00000183072, ENSG00000171791, ENSG00000178860, ENSG00000129194, ENSG00000157168, ENSG00000142700, ENSG00000003402, ENSG00000137312, ENSG00000166823	282	350	16650	1.68693	1	1	0.991488
GOTERM_BP_FAT	GO:0007507~heart development	13	3.80117	0.156193	ENSG00000103241, ENSG00000112715, ENSG00000130700, ENSG00000180340, ENSG00000081479, ENSG00000157168, ENSG00000185070, ENSG00000183072, ENSG00000184271, ENSG00000166147, ENSG00000169126, ENSG00000113083, ENSG00000166823	282	511	16650	1.50206	1	1	0.991488
GOTERM_BP_FAT	GO:0003007~heart morphogenesis	7	2.04678	0.1941	ENSG00000103241, ENSG00000112715, ENSG00000183072, ENSG00000180340, ENSG00000157168, ENSG00000166823, ENSG00000185070	282	230	16650	1.79695	1	1	0.991488
GOTERM_BP_FAT	GO:0055007~cardiac muscle cell differentiation	4	1.16959	0.225152	ENSG00000112715, ENSG00000183072, ENSG00000157168, ENSG00000166823	282	97	16650	2.43474	1	1	0.991488
GOTERM_BP_FAT	GO:0048732~gland development	10	2.92398	0.283735	ENSG00000103241, ENSG00000112715, ENSG00000183072, ENSG00000126561, ENSG00000171791, ENSG00000128714, ENSG00000100300, ENSG00000157168, ENSG00000136997, ENSG00000166823	282	421	16650	1.40244	1	1	0.991488
GOTERM_BP_FAT	GO:0003281~ventricular septum development	3	0.877193	0.287714	ENSG00000183072, ENSG00000180340, ENSG00000081479	282	63	16650	2.81155	1	1	0.991488
GOTERM_BP_FAT	GO:0035051~cardiocyte differentiation	4	1.16959	0.339454	ENSG00000112715, ENSG00000183072, ENSG00000157168, ENSG00000166823	282	122	16650	1.93582	1	1	0.991488
GOTERM_BP_FAT	GO:0060419~heart growth	3	0.877193	0.343648	ENSG00000183072, ENSG00000157168, ENSG00000166823	282	72	16650	2.46011	1	1	0.991488
GOTERM_BP_FAT	GO:0060415~muscle tissue morphogenesis	3	0.877193	0.349787	ENSG00000183072, ENSG00000180340, ENSG00000157168	282	73	16650	2.42641	1	1	0.991488
GOTERM_BP_FAT	GO:0048644~muscle organ morphogenesis	3	0.877193	0.392162	ENSG00000183072, ENSG00000180340, ENSG00000157168	282	80	16650	2.2141	1	1	0.991488
GOTERM_BP_FAT	GO:0035265~organ growth	4	1.16959	0.412722	ENSG00000183072, ENSG00000171791, ENSG00000157168, ENSG00000166823	282	138	16650	1.71138	1	1	0.991488
GOTERM_BP_FAT	GO:0003279~cardiac septum development	3	0.877193	0.48382	ENSG00000183072, ENSG00000180340, ENSG00000081479	282	96	16650	1.84508	1	1	0.991488
GOTERM_BP_FAT	GO:0048738~cardiac muscle tissue development	4	1.16959	0.610668	ENSG00000112715, ENSG00000183072, ENSG00000157168, ENSG00000166823	282	186	16650	1.26973	1	1	0.991488
Annotation Cluster 29	Enrichment Score: 0.9063891813649065
Category	Term	Count	%	PValue	Genes	List Total	Pop Hits	Pop Total	Fold Enrichment	Bonferroni	Benjamini	FDR
GOTERM_BP_FAT	GO:0060841~venous blood vessel development	3	0.877193	0.0291439	ENSG00000103241, ENSG00000112715, ENSG00000183072	282	16	16650	11.0705	1	0.924946	0.916862
GOTERM_BP_FAT	GO:0003007~heart morphogenesis	7	2.04678	0.1941	ENSG00000103241, ENSG00000112715, ENSG00000183072, ENSG00000180340, ENSG00000157168, ENSG00000166823, ENSG00000185070	282	230	16650	1.79695	1	1	0.991488
GOTERM_BP_FAT	GO:0001570~vasculogenesis	3	0.877193	0.337489	ENSG00000103241, ENSG00000112715, ENSG00000183072	282	71	16650	2.49476	1	1	0.991488
Annotation Cluster 30	Enrichment Score: 0.8947386861368438
Category	Term	Count	%	PValue	Genes	List Total	Pop Hits	Pop Total	Fold Enrichment	Bonferroni	Benjamini	FDR
GOTERM_BP_FAT	GO:0075733~intracellular transport of virus	4	1.16959	0.103946	ENSG00000213024, ENSG00000204267, ENSG00000182481, ENSG00000030066	282	67	16650	3.52493	1	1	0.991488
GOTERM_BP_FAT	GO:1902583~multi-organism intracellular transport	4	1.16959	0.107458	ENSG00000213024, ENSG00000204267, ENSG00000182481, ENSG00000030066	282	68	16650	3.47309	1	1	0.991488
GOTERM_BP_FAT	GO:1902581~multi-organism cellular localization	4	1.16959	0.107458	ENSG00000213024, ENSG00000204267, ENSG00000182481, ENSG00000030066	282	68	16650	3.47309	1	1	0.991488
GOTERM_BP_FAT	GO:0046794~transport of virus	4	1.16959	0.114619	ENSG00000213024, ENSG00000204267, ENSG00000182481, ENSG00000030066	282	70	16650	3.37386	1	1	0.991488
GOTERM_BP_FAT	GO:0044766~multi-organism transport	4	1.16959	0.129457	ENSG00000213024, ENSG00000204267, ENSG00000182481, ENSG00000030066	282	74	16650	3.19149	1	1	0.991488
GOTERM_BP_FAT	GO:1902579~multi-organism localization	4	1.16959	0.129457	ENSG00000213024, ENSG00000204267, ENSG00000182481, ENSG00000030066	282	74	16650	3.19149	1	1	0.991488
GOTERM_BP_FAT	GO:0019058~viral life cycle	11	3.21637	0.236607	ENSG00000197381, ENSG00000142089, ENSG00000213024, ENSG00000204267, ENSG00000182481, ENSG00000030066, ENSG00000171791, ENSG00000055332, ENSG00000185201, ENSG00000160710, ENSG00000124795	282	455	16650	1.4274	1	1	0.991488
Annotation Cluster 31	Enrichment Score: 0.8933304930976183
Category	Term	Count	%	PValue	Genes	List Total	Pop Hits	Pop Total	Fold Enrichment	Bonferroni	Benjamini	FDR
GOTERM_BP_FAT	GO:0060485~mesenchyme development	10	2.92398	0.018147	ENSG00000137273, ENSG00000103241, ENSG00000183072, ENSG00000116670, ENSG00000187553, ENSG00000171791, ENSG00000115318, ENSG00000157168, ENSG00000136997, ENSG00000166823	282	234	16650	2.52319	1	0.758684	0.752054
GOTERM_BP_FAT	GO:0014031~mesenchymal cell development	6	1.75439	0.152703	ENSG00000137273, ENSG00000116670, ENSG00000187553, ENSG00000171791, ENSG00000115318, ENSG00000157168	282	167	16650	2.12129	1	1	0.991488
GOTERM_BP_FAT	GO:0048762~mesenchymal cell differentiation	6	1.75439	0.183123	ENSG00000137273, ENSG00000116670, ENSG00000187553, ENSG00000171791, ENSG00000115318, ENSG00000157168	282	178	16650	1.9902	1	1	0.991488
GOTERM_BP_FAT	GO:0001837~epithelial to mesenchymal transition	3	0.877193	0.526359	ENSG00000137273, ENSG00000116670, ENSG00000115318	282	104	16650	1.70315	1	1	0.991488
Annotation Cluster 32	Enrichment Score: 0.8838287557960144
Category	Term	Count	%	PValue	Genes	List Total	Pop Hits	Pop Total	Fold Enrichment	Bonferroni	Benjamini	FDR
GOTERM_BP_FAT	GO:0072089~stem cell proliferation	6	1.75439	0.0282256	ENSG00000175707, ENSG00000112715, ENSG00000164362, ENSG00000055332, ENSG00000161800, ENSG00000142700	282	101	16650	3.50748	1	0.924946	0.916862
GOTERM_BP_FAT	GO:0007405~neuroblast proliferation	3	0.877193	0.212649	ENSG00000112715, ENSG00000161800, ENSG00000142700	282	51	16650	3.47309	1	1	0.991488
GOTERM_BP_FAT	GO:0061351~neural precursor cell proliferation	4	1.16959	0.371713	ENSG00000112715, ENSG00000089116, ENSG00000161800, ENSG00000142700	282	129	16650	1.83078	1	1	0.991488
Annotation Cluster 33	Enrichment Score: 0.8770570579465037
Category	Term	Count	%	PValue	Genes	List Total	Pop Hits	Pop Total	Fold Enrichment	Bonferroni	Benjamini	FDR
GOTERM_BP_FAT	GO:0007548~sex differentiation	12	3.50877	0.00614963	ENSG00000137273, ENSG00000165474, ENSG00000005073, ENSG00000112715, ENSG00000171791, ENSG00000123999, ENSG00000128714, ENSG00000129194, ENSG00000100918, ENSG00000142700, ENSG00000136997, ENSG00000143355	282	269	16650	2.63387	1	0.393215	0.389778
GOTERM_BP_FAT	GO:0046661~male sex differentiation	8	2.33918	0.0178795	ENSG00000165474, ENSG00000005073, ENSG00000171791, ENSG00000123999, ENSG00000128714, ENSG00000129194, ENSG00000100918, ENSG00000143355	282	158	16650	2.9895	1	0.754757	0.748161
GOTERM_BP_FAT	GO:0008406~gonad development	8	2.33918	0.0699668	ENSG00000005073, ENSG00000112715, ENSG00000171791, ENSG00000123999, ENSG00000129194, ENSG00000100918, ENSG00000136997, ENSG00000143355	282	213	16650	2.21756	1	1	0.991488
GOTERM_BP_FAT	GO:0045137~development of primary sexual characteristics	8	2.33918	0.0769112	ENSG00000005073, ENSG00000112715, ENSG00000171791, ENSG00000123999, ENSG00000129194, ENSG00000100918, ENSG00000136997, ENSG00000143355	282	218	16650	2.1667	1	1	0.991488
GOTERM_BP_FAT	GO:0008584~male gonad development	6	1.75439	0.0806861	ENSG00000005073, ENSG00000171791, ENSG00000123999, ENSG00000129194, ENSG00000100918, ENSG00000143355	282	136	16650	2.60482	1	1	0.991488
GOTERM_BP_FAT	GO:0046546~development of primary male sexual characteristics	6	1.75439	0.0806861	ENSG00000005073, ENSG00000171791, ENSG00000123999, ENSG00000129194, ENSG00000100918, ENSG00000143355	282	136	16650	2.60482	1	1	0.991488
GOTERM_BP_FAT	GO:0048608~reproductive structure development	12	3.50877	0.0981344	ENSG00000137273, ENSG00000165474, ENSG00000005073, ENSG00000112715, ENSG00000171791, ENSG00000123999, ENSG00000112559, ENSG00000128714, ENSG00000129194, ENSG00000100918, ENSG00000136997, ENSG00000143355	282	418	16650	1.695	1	1	0.991488
GOTERM_BP_FAT	GO:0061458~reproductive system development	12	3.50877	0.103934	ENSG00000137273, ENSG00000165474, ENSG00000005073, ENSG00000112715, ENSG00000171791, ENSG00000123999, ENSG00000112559, ENSG00000128714, ENSG00000129194, ENSG00000100918, ENSG00000136997, ENSG00000143355	282	423	16650	1.67497	1	1	0.991488
GOTERM_BP_FAT	GO:0003006~developmental process involved in reproduction	16	4.67836	0.122342	ENSG00000112715, ENSG00000171791, ENSG00000112559, ENSG00000129194, ENSG00000076242, ENSG00000100918, ENSG00000136997, ENSG00000137273, ENSG00000005073, ENSG00000165474, ENSG00000123999, ENSG00000120899, ENSG00000184792, ENSG00000128714, ENSG00000142700, ENSG00000143355	282	636	16650	1.48535	1	1	0.991488
GOTERM_BP_FAT	GO:0000003~reproduction	29	8.47953	0.172813	ENSG00000174371, ENSG00000160207, ENSG00000213024, ENSG00000130270, ENSG00000113810, ENSG00000076242, ENSG00000100918, ENSG00000136997, ENSG00000148803, ENSG00000188620, ENSG00000120899, ENSG00000128714, ENSG00000161800, ENSG00000142700, ENSG00000143355, ENSG00000141696, ENSG00000112715, ENSG00000171791, ENSG00000132749, ENSG00000112559, ENSG00000237649, ENSG00000129194, ENSG00000139874, ENSG0000…	282	1375	16650	1.24526	1	1	0.991488
GOTERM_BP_FAT	GO:0048609~multicellular organismal reproductive process	18	5.26316	0.174609	ENSG00000112715, ENSG00000160207, ENSG00000213024, ENSG00000132749, ENSG00000171791, ENSG00000237649, ENSG00000076242, ENSG00000100918, ENSG00000139874, ENSG00000136997, ENSG00000005073, ENSG00000165474, ENSG00000148803, ENSG00000188620, ENSG00000123999, ENSG00000120899, ENSG00000184792, ENSG00000161800	282	783	16650	1.3573	1	1	0.991488
GOTERM_BP_FAT	GO:0032504~multicellular organism reproduction	18	5.26316	0.185002	ENSG00000112715, ENSG00000160207, ENSG00000213024, ENSG00000132749, ENSG00000171791, ENSG00000237649, ENSG00000076242, ENSG00000100918, ENSG00000139874, ENSG00000136997, ENSG00000005073, ENSG00000165474, ENSG00000148803, ENSG00000188620, ENSG00000123999, ENSG00000120899, ENSG00000184792, ENSG00000161800	282	792	16650	1.34188	1	1	0.991488
GOTERM_BP_FAT	GO:0044702~single organism reproductive process	26	7.60234	0.18991	ENSG00000174371, ENSG00000160207, ENSG00000213024, ENSG00000130270, ENSG00000113810, ENSG00000076242, ENSG00000100918, ENSG00000136997, ENSG00000188620, ENSG00000120899, ENSG00000128714, ENSG00000161800, ENSG00000143355, ENSG00000141696, ENSG00000112715, ENSG00000171791, ENSG00000132749, ENSG00000112559, ENSG00000237649, ENSG00000129194, ENSG00000139874, ENSG00000137273, ENSG00000005073, ENSG0000…	282	1231	16650	1.24704	1	1	0.991488
GOTERM_BP_FAT	GO:0022414~reproductive process	28	8.18713	0.229053	ENSG00000174371, ENSG00000160207, ENSG00000213024, ENSG00000130270, ENSG00000113810, ENSG00000076242, ENSG00000100918, ENSG00000136997, ENSG00000148803, ENSG00000188620, ENSG00000120899, ENSG00000128714, ENSG00000161800, ENSG00000142700, ENSG00000143355, ENSG00000141696, ENSG00000112715, ENSG00000171791, ENSG00000132749, ENSG00000112559, ENSG00000237649, ENSG00000129194, ENSG00000139874, ENSG0000…	282	1373	16650	1.20407	1	1	0.991488
GOTERM_BP_FAT	GO:0007276~gamete generation	13	3.80117	0.369554	ENSG00000160207, ENSG00000213024, ENSG00000132749, ENSG00000171791, ENSG00000237649, ENSG00000076242, ENSG00000100918, ENSG00000139874, ENSG00000136997, ENSG00000005073, ENSG00000120899, ENSG00000184792, ENSG00000161800	282	629	16650	1.22028	1	1	0.991488
GOTERM_BP_FAT	GO:0019953~sexual reproduction	15	4.38596	0.426665	ENSG00000160207, ENSG00000213024, ENSG00000132749, ENSG00000171791, ENSG00000130270, ENSG00000237649, ENSG00000076242, ENSG00000100918, ENSG00000139874, ENSG00000136997, ENSG00000005073, ENSG00000148803, ENSG00000120899, ENSG00000184792, ENSG00000161800	282	770	16650	1.15018	1	1	0.991488
GOTERM_BP_FAT	GO:0048232~male gamete generation	10	2.92398	0.46727	ENSG00000005073, ENSG00000160207, ENSG00000213024, ENSG00000132749, ENSG00000184792, ENSG00000237649, ENSG00000076242, ENSG00000100918, ENSG00000161800, ENSG00000139874	282	504	16650	1.17148	1	1	0.991488
GOTERM_BP_FAT	GO:0007283~spermatogenesis	10	2.92398	0.479828	ENSG00000005073, ENSG00000160207, ENSG00000213024, ENSG00000132749, ENSG00000184792, ENSG00000237649, ENSG00000076242, ENSG00000100918, ENSG00000161800, ENSG00000139874	282	503	16650	1.17381	1	1	0.991488
GOTERM_BP_FAT	GO:0044703~multi-organism reproductive process	17	4.97076	0.525237	ENSG00000160207, ENSG00000213024, ENSG00000132749, ENSG00000171791, ENSG00000130270, ENSG00000237649, ENSG00000076242, ENSG00000100918, ENSG00000139874, ENSG00000136997, ENSG00000005073, ENSG00000165474, ENSG00000148803, ENSG00000188620, ENSG00000120899, ENSG00000184792, ENSG00000161800	282	936	16650	1.07235	1	1	0.991488
Annotation Cluster 34	Enrichment Score: 0.8665620206186151
Category	Term	Count	%	PValue	Genes	List Total	Pop Hits	Pop Total	Fold Enrichment	Bonferroni	Benjamini	FDR
GOTERM_BP_FAT	GO:0090596~sensory organ morphogenesis	11	3.21637	0.0101811	ENSG00000171812, ENSG00000137273, ENSG00000112715, ENSG00000166147, ENSG00000188620, ENSG00000115507, ENSG00000171791, ENSG00000180340, ENSG00000109705, ENSG00000159842, ENSG00000161798	282	250	16650	2.59787	1	0.560348	0.555451
GOTERM_BP_FAT	GO:0042471~ear morphogenesis	5	1.46199	0.127174	ENSG00000188620, ENSG00000115507, ENSG00000180340, ENSG00000109705, ENSG00000159842	282	114	16650	2.58959	1	1	0.991488
GOTERM_BP_FAT	GO:0007423~sensory organ development	13	3.80117	0.151153	ENSG00000112715, ENSG00000115507, ENSG00000180340, ENSG00000171791, ENSG00000109705, ENSG00000159842, ENSG00000171812, ENSG00000137273, ENSG00000166147, ENSG00000188620, ENSG00000102878, ENSG00000142611, ENSG00000161798	282	507	16650	1.51391	1	1	0.991488
GOTERM_BP_FAT	GO:0042472~inner ear morphogenesis	4	1.16959	0.211905	ENSG00000188620, ENSG00000115507, ENSG00000180340, ENSG00000159842	282	94	16650	2.51245	1	1	0.991488
GOTERM_BP_FAT	GO:0043583~ear development	6	1.75439	0.262314	ENSG00000188620, ENSG00000115507, ENSG00000171791, ENSG00000180340, ENSG00000109705, ENSG00000159842	282	204	16650	1.73655	1	1	0.991488
GOTERM_BP_FAT	GO:0048839~inner ear development	4	1.16959	0.580835	ENSG00000188620, ENSG00000115507, ENSG00000180340, ENSG00000159842	282	178	16650	1.3268	1	1	0.991488
Annotation Cluster 35	Enrichment Score: 0.8439577731663517
Category	Term	Count	%	PValue	Genes	List Total	Pop Hits	Pop Total	Fold Enrichment	Bonferroni	Benjamini	FDR
GOTERM_BP_FAT	GO:0035455~response to interferon-alpha	4	1.16959	0.00377209	ENSG00000142089, ENSG00000055332, ENSG00000185201, ENSG00000160710	282	19	16650	12.43	1	0.303723	0.301069
GOTERM_BP_FAT	GO:0045069~regulation of viral genome replication	6	1.75439	0.0119433	ENSG00000197381, ENSG00000142089, ENSG00000171791, ENSG00000055332, ENSG00000185201, ENSG00000160710	282	81	16650	4.37352	1	0.625658	0.62019
GOTERM_BP_FAT	GO:0051607~defense response to virus	10	2.92398	0.0160042	ENSG00000185507, ENSG00000197381, ENSG00000069431, ENSG00000142089, ENSG00000103490, ENSG00000171791, ENSG00000055332, ENSG00000185201, ENSG00000160710, ENSG00000107201	282	229	16650	2.57828	1	0.727378	0.721021
GOTERM_BP_FAT	GO:0019079~viral genome replication	6	1.75439	0.0337808	ENSG00000197381, ENSG00000142089, ENSG00000055332, ENSG00000185201, ENSG00000160710, ENSG00000124795	282	106	16650	3.34203	1	0.992426	0.983753
GOTERM_BP_FAT	GO:0071357~cellular response to type I interferon	5	1.46199	0.0364208	ENSG00000185507, ENSG00000142089, ENSG00000204642, ENSG00000185201, ENSG00000160710	282	74	16650	3.98936	1	1	0.991488
GOTERM_BP_FAT	GO:0060337~type I interferon signaling pathway	5	1.46199	0.0364208	ENSG00000185507, ENSG00000142089, ENSG00000204642, ENSG00000185201, ENSG00000160710	282	74	16650	3.98936	1	1	0.991488
GOTERM_BP_FAT	GO:0034340~response to type I interferon	5	1.46199	0.0428893	ENSG00000185507, ENSG00000142089, ENSG00000204642, ENSG00000185201, ENSG00000160710	282	78	16650	3.78478	1	1	0.991488
GOTERM_BP_FAT	GO:0002252~immune effector process	20	5.84795	0.0470203	ENSG00000197381, ENSG00000069431, ENSG00000047621, ENSG00000185507, ENSG00000174371, ENSG00000103241, ENSG00000255690, ENSG00000196230, ENSG00000103490, ENSG00000171791, ENSG00000076242, ENSG00000167191, ENSG00000064932, ENSG00000159842, ENSG00000142089, ENSG00000120899, ENSG00000055332, ENSG00000185201, ENSG00000160710, ENSG00000107201	282	742	16650	1.59144	1	1	0.991488
GOTERM_BP_FAT	GO:0045071~negative regulation of viral genome replication	4	1.16959	0.0547455	ENSG00000142089, ENSG00000055332, ENSG00000185201, ENSG00000160710	282	51	16650	4.63079	1	1	0.991488
GOTERM_BP_FAT	GO:0050792~regulation of viral process	9	2.63158	0.0769101	ENSG00000197381, ENSG00000142089, ENSG00000103490, ENSG00000204267, ENSG00000171791, ENSG00000055332, ENSG00000185201, ENSG00000160710, ENSG00000107201	282	262	16650	2.02818	1	1	0.991488
GOTERM_BP_FAT	GO:0009615~response to virus	10	2.92398	0.0818521	ENSG00000185507, ENSG00000197381, ENSG00000069431, ENSG00000142089, ENSG00000103490, ENSG00000171791, ENSG00000055332, ENSG00000185201, ENSG00000160710, ENSG00000107201	282	311	16650	1.89847	1	1	0.991488
GOTERM_BP_FAT	GO:0034097~response to cytokine	20	5.84795	0.0863317	ENSG00000185507, ENSG00000103241, ENSG00000126561, ENSG00000103490, ENSG00000171791, ENSG00000215788, ENSG00000120949, ENSG00000174516, ENSG00000136997, ENSG00000064932, ENSG00000185070, ENSG00000142089, ENSG00000185187, ENSG00000204642, ENSG00000120899, ENSG00000204435, ENSG00000055332, ENSG00000185201, ENSG00000227507, ENSG00000160710	282	802	16650	1.47238	1	1	0.991488
GOTERM_BP_FAT	GO:0071345~cellular response to cytokine stimulus	18	5.26316	0.0903099	ENSG00000185507, ENSG00000103241, ENSG00000126561, ENSG00000103490, ENSG00000215788, ENSG00000120949, ENSG00000174516, ENSG00000136997, ENSG00000064932, ENSG00000185070, ENSG00000142089, ENSG00000185187, ENSG00000204642, ENSG00000120899, ENSG00000204435, ENSG00000185201, ENSG00000227507, ENSG00000160710	282	706	16650	1.50533	1	1	0.991488
GOTERM_BP_FAT	GO:0043903~regulation of symbiosis, encompassing mutualism through parasitism	9	2.63158	0.110583	ENSG00000197381, ENSG00000142089, ENSG00000103490, ENSG00000204267, ENSG00000171791, ENSG00000055332, ENSG00000185201, ENSG00000160710, ENSG00000107201	282	285	16650	1.8645	1	1	0.991488
GOTERM_BP_FAT	GO:0051701~interaction with host	6	1.75439	0.12954	ENSG00000142089, ENSG00000204267, ENSG00000182481, ENSG00000055332, ENSG00000185201, ENSG00000136997	282	158	16650	2.24212	1	1	0.991488
GOTERM_BP_FAT	GO:1903900~regulation of viral life cycle	6	1.75439	0.180583	ENSG00000197381, ENSG00000142089, ENSG00000171791, ENSG00000055332, ENSG00000185201, ENSG00000160710	282	177	16650	2.00144	1	1	0.991488
GOTERM_BP_FAT	GO:0006955~immune response	32	9.35673	0.183765	ENSG00000047621, ENSG00000185507, ENSG00000174371, ENSG00000130675, ENSG00000103490, ENSG00000215788, ENSG00000120949, ENSG00000076242, ENSG00000136997, ENSG00000142089, ENSG00000145416, ENSG00000120899, ENSG00000055332, ENSG00000073849, ENSG00000160710, ENSG00000197381, ENSG00000103241, ENSG00000255690, ENSG00000196230, ENSG00000171791, ENSG00000005339, ENSG00000167191, ENSG00000159842, ENSG0000…	282	1551	16650	1.21816	1	1	0.991488
GOTERM_BP_FAT	GO:0043900~regulation of multi-organism process	10	2.92398	0.186333	ENSG00000197381, ENSG00000142089, ENSG00000185187, ENSG00000103490, ENSG00000204267, ENSG00000171791, ENSG00000055332, ENSG00000185201, ENSG00000160710, ENSG00000107201	282	377	16650	1.56612	1	1	0.991488
GOTERM_BP_FAT	GO:1903901~negative regulation of viral life cycle	4	1.16959	0.19024	ENSG00000142089, ENSG00000055332, ENSG00000185201, ENSG00000160710	282	89	16650	2.6536	1	1	0.991488
GOTERM_BP_FAT	GO:0019058~viral life cycle	11	3.21637	0.236607	ENSG00000197381, ENSG00000142089, ENSG00000213024, ENSG00000204267, ENSG00000182481, ENSG00000030066, ENSG00000171791, ENSG00000055332, ENSG00000185201, ENSG00000160710, ENSG00000124795	282	455	16650	1.4274	1	1	0.991488
GOTERM_BP_FAT	GO:0002244~hematopoietic progenitor cell differentiation	4	1.16959	0.252091	ENSG00000171791, ENSG00000055332, ENSG00000160710, ENSG00000162367	282	103	16650	2.29291	1	1	0.991488
GOTERM_BP_FAT	GO:0043901~negative regulation of multi-organism process	5	1.46199	0.273796	ENSG00000142089, ENSG00000185187, ENSG00000055332, ENSG00000185201, ENSG00000160710	282	157	16650	1.88034	1	1	0.991488
GOTERM_BP_FAT	GO:0048525~negative regulation of viral process	4	1.16959	0.27488	ENSG00000142089, ENSG00000055332, ENSG00000185201, ENSG00000160710	282	108	16650	2.18676	1	1	0.991488
GOTERM_BP_FAT	GO:0034341~response to interferon-gamma	5	1.46199	0.288832	ENSG00000185507, ENSG00000142089, ENSG00000204642, ENSG00000185201, ENSG00000136997	282	161	16650	1.83362	1	1	0.991488
GOTERM_BP_FAT	GO:0009605~response to external stimulus	39	11.4035	0.317234	ENSG00000069431, ENSG00000185507, ENSG00000104321, ENSG00000158747, ENSG00000103490, ENSG00000215788, ENSG00000120949, ENSG00000158445, ENSG00000005882, ENSG00000185070, ENSG00000089505, ENSG00000142089, ENSG00000120899, ENSG00000055332, ENSG00000100300, ENSG00000160710, ENSG00000143355, ENSG00000197381, ENSG00000103241, ENSG00000112715, ENSG00000154134, ENSG00000174684, ENSG00000171791, ENSG0000…	282	2073	16650	1.11079	1	1	0.991488
GOTERM_BP_FAT	GO:0006952~defense response	29	8.47953	0.338616	ENSG00000069431, ENSG00000185507, ENSG00000103490, ENSG00000215788, ENSG00000120949, ENSG00000136997, ENSG00000142089, ENSG00000120899, ENSG00000055332, ENSG00000160710, ENSG00000197381, ENSG00000103241, ENSG00000255690, ENSG00000213694, ENSG00000196230, ENSG00000171791, ENSG00000106538, ENSG00000005339, ENSG00000167191, ENSG00000159842, ENSG00000064932, ENSG00000137312, ENSG00000173457, ENSG0000…	282	1518	16650	1.12795	1	1	0.991488
GOTERM_BP_FAT	GO:0016032~viral process	19	5.55556	0.365425	ENSG00000197381, ENSG00000069431, ENSG00000185507, ENSG00000213024, ENSG00000103490, ENSG00000171791, ENSG00000005339, ENSG00000136997, ENSG00000003402, ENSG00000142089, ENSG00000151725, ENSG00000204267, ENSG00000030066, ENSG00000182481, ENSG00000055332, ENSG00000185201, ENSG00000160710, ENSG00000107201, ENSG00000124795	282	966	16650	1.16129	1	1	0.991488
GOTERM_BP_FAT	GO:0044764~multi-organism cellular process	19	5.55556	0.378516	ENSG00000197381, ENSG00000069431, ENSG00000185507, ENSG00000213024, ENSG00000103490, ENSG00000171791, ENSG00000005339, ENSG00000136997, ENSG00000003402, ENSG00000142089, ENSG00000151725, ENSG00000204267, ENSG00000030066, ENSG00000182481, ENSG00000055332, ENSG00000185201, ENSG00000160710, ENSG00000107201, ENSG00000124795	282	973	16650	1.15294	1	1	0.991488
GOTERM_BP_FAT	GO:0009607~response to biotic stimulus	17	4.97076	0.411273	ENSG00000197381, ENSG00000069431, ENSG00000185507, ENSG00000103490, ENSG00000171791, ENSG00000215788, ENSG00000120949, ENSG00000136997, ENSG00000064932, ENSG00000159842, ENSG00000142089, ENSG00000185187, ENSG00000055332, ENSG00000185201, ENSG00000100300, ENSG00000160710, ENSG00000107201	282	873	16650	1.14974	1	1	0.991488
GOTERM_BP_FAT	GO:0044403~symbiosis, encompassing mutualism through parasitism	19	5.55556	0.418738	ENSG00000197381, ENSG00000069431, ENSG00000185507, ENSG00000213024, ENSG00000103490, ENSG00000171791, ENSG00000005339, ENSG00000136997, ENSG00000003402, ENSG00000142089, ENSG00000151725, ENSG00000204267, ENSG00000030066, ENSG00000182481, ENSG00000055332, ENSG00000185201, ENSG00000160710, ENSG00000107201, ENSG00000124795	282	998	16650	1.12406	1	1	0.991488
GOTERM_BP_FAT	GO:0044419~interspecies interaction between organisms	19	5.55556	0.418738	ENSG00000197381, ENSG00000069431, ENSG00000185507, ENSG00000213024, ENSG00000103490, ENSG00000171791, ENSG00000005339, ENSG00000136997, ENSG00000003402, ENSG00000142089, ENSG00000151725, ENSG00000204267, ENSG00000030066, ENSG00000182481, ENSG00000055332, ENSG00000185201, ENSG00000160710, ENSG00000107201, ENSG00000124795	282	998	16650	1.12406	1	1	0.991488
GOTERM_BP_FAT	GO:0051707~response to other organism	16	4.67836	0.424454	ENSG00000197381, ENSG00000069431, ENSG00000185507, ENSG00000103490, ENSG00000171791, ENSG00000215788, ENSG00000120949, ENSG00000064932, ENSG00000159842, ENSG00000142089, ENSG00000185187, ENSG00000055332, ENSG00000185201, ENSG00000100300, ENSG00000160710, ENSG00000107201	282	829	16650	1.13954	1	1	0.991488
GOTERM_BP_FAT	GO:0043207~response to external biotic stimulus	16	4.67836	0.424454	ENSG00000197381, ENSG00000069431, ENSG00000185507, ENSG00000103490, ENSG00000171791, ENSG00000215788, ENSG00000120949, ENSG00000064932, ENSG00000159842, ENSG00000142089, ENSG00000185187, ENSG00000055332, ENSG00000185201, ENSG00000100300, ENSG00000160710, ENSG00000107201	282	829	16650	1.13954	1	1	0.991488
GOTERM_BP_FAT	GO:0045087~innate immune response	16	4.67836	0.441533	ENSG00000197381, ENSG00000185507, ENSG00000255690, ENSG00000196230, ENSG00000103490, ENSG00000005339, ENSG00000136997, ENSG00000137312, ENSG00000173457, ENSG00000142089, ENSG00000204642, ENSG00000120899, ENSG00000055332, ENSG00000185201, ENSG00000160710, ENSG00000107201	282	836	16650	1.13	1	1	0.991488
GOTERM_BP_FAT	GO:0098542~defense response to other organism	10	2.92398	0.458806	ENSG00000185507, ENSG00000197381, ENSG00000069431, ENSG00000142089, ENSG00000103490, ENSG00000171791, ENSG00000055332, ENSG00000185201, ENSG00000160710, ENSG00000107201	282	494	16650	1.19519	1	1	0.991488
GOTERM_BP_FAT	GO:0031347~regulation of defense response	13	3.80117	0.467285	ENSG00000185507, ENSG00000103241, ENSG00000255690, ENSG00000103490, ENSG00000005339, ENSG00000167191, ENSG00000064932, ENSG00000159842, ENSG00000137312, ENSG00000055332, ENSG00000144891, ENSG00000160710, ENSG00000107201	282	676	16650	1.13543	1	1	0.991488
GOTERM_BP_FAT	GO:0050776~regulation of immune response	13	3.80117	0.849376	ENSG00000047621, ENSG00000185507, ENSG00000103241, ENSG00000255690, ENSG00000103490, ENSG00000171791, ENSG00000005339, ENSG00000167191, ENSG00000159842, ENSG00000137312, ENSG00000204642, ENSG00000160710, ENSG00000107201	282	912	16650	0.841615	1	1	0.991488
Annotation Cluster 36	Enrichment Score: 0.837247998647518
Category	Term	Count	%	PValue	Genes	List Total	Pop Hits	Pop Total	Fold Enrichment	Bonferroni	Benjamini	FDR
GOTERM_BP_FAT	GO:0051101~regulation of DNA binding	6	1.75439	0.0242273	ENSG00000132326, ENSG00000116670, ENSG00000102977, ENSG00000204435, ENSG00000112559, ENSG00000136997	282	97	16650	3.65212	1	0.856425	0.84894
GOTERM_BP_FAT	GO:0043392~negative regulation of DNA binding	3	0.877193	0.188011	ENSG00000132326, ENSG00000116670, ENSG00000112559	282	47	16650	3.76867	1	1	0.991488
GOTERM_BP_FAT	GO:0051100~negative regulation of binding	3	0.877193	0.675723	ENSG00000132326, ENSG00000116670, ENSG00000112559	282	137	16650	1.2929	1	1	0.991488
Annotation Cluster 37	Enrichment Score: 0.8125915138251412
Category	Term	Count	%	PValue	Genes	List Total	Pop Hits	Pop Total	Fold Enrichment	Bonferroni	Benjamini	FDR
GOTERM_BP_FAT	GO:0045197~establishment or maintenance of epithelial cell apical/basal polarity	3	0.877193	0.0958947	ENSG00000103241, ENSG00000104863, ENSG00000029534	282	31	16650	5.7138	1	1	0.991488
GOTERM_BP_FAT	GO:0035088~establishment or maintenance of apical/basal cell polarity	3	0.877193	0.134493	ENSG00000103241, ENSG00000104863, ENSG00000029534	282	38	16650	4.66125	1	1	0.991488
GOTERM_BP_FAT	GO:0061245~establishment or maintenance of bipolar cell polarity	3	0.877193	0.134493	ENSG00000103241, ENSG00000104863, ENSG00000029534	282	38	16650	4.66125	1	1	0.991488
GOTERM_BP_FAT	GO:0007163~establishment or maintenance of cell polarity	5	1.46199	0.323922	ENSG00000103241, ENSG00000104863, ENSG00000136098, ENSG00000120899, ENSG00000029534	282	170	16650	1.73655	1	1	0.991488
Annotation Cluster 38	Enrichment Score: 0.7925443386309691
Category	Term	Count	%	PValue	Genes	List Total	Pop Hits	Pop Total	Fold Enrichment	Bonferroni	Benjamini	FDR
GOTERM_BP_FAT	GO:0042089~cytokine biosynthetic process	5	1.46199	0.0967351	ENSG00000185507, ENSG00000185187, ENSG00000123999, ENSG00000120949, ENSG00000227507	282	103	16650	2.86614	1	1	0.991488
GOTERM_BP_FAT	GO:0042107~cytokine metabolic process	5	1.46199	0.101988	ENSG00000185507, ENSG00000185187, ENSG00000123999, ENSG00000120949, ENSG00000227507	282	105	16650	2.81155	1	1	0.991488
GOTERM_BP_FAT	GO:0001817~regulation of cytokine production	14	4.09357	0.17845	ENSG00000185507, ENSG00000255690, ENSG00000213694, ENSG00000103490, ENSG00000120949, ENSG00000005339, ENSG00000167191, ENSG00000137312, ENSG00000185187, ENSG00000123999, ENSG00000055332, ENSG00000227507, ENSG00000100300, ENSG00000107201	282	577	16650	1.43257	1	1	0.991488
GOTERM_BP_FAT	GO:0042035~regulation of cytokine biosynthetic process	4	1.16959	0.229604	ENSG00000185187, ENSG00000123999, ENSG00000120949, ENSG00000227507	282	98	16650	2.4099	1	1	0.991488
GOTERM_BP_FAT	GO:0001816~cytokine production	14	4.09357	0.269557	ENSG00000185507, ENSG00000255690, ENSG00000213694, ENSG00000103490, ENSG00000120949, ENSG00000005339, ENSG00000167191, ENSG00000137312, ENSG00000185187, ENSG00000123999, ENSG00000055332, ENSG00000227507, ENSG00000100300, ENSG00000107201	282	631	16650	1.30998	1	1	0.991488
Annotation Cluster 39	Enrichment Score: 0.7886126888274724
Category	Term	Count	%	PValue	Genes	List Total	Pop Hits	Pop Total	Fold Enrichment	Bonferroni	Benjamini	FDR
GOTERM_BP_FAT	GO:0010656~negative regulation of muscle cell apoptotic process	3	0.877193	0.085555	ENSG00000183072, ENSG00000120899, ENSG00000157168	282	29	16650	6.10785	1	1	0.991488
GOTERM_BP_FAT	GO:0010660~regulation of muscle cell apoptotic process	3	0.877193	0.206457	ENSG00000183072, ENSG00000120899, ENSG00000157168	282	50	16650	3.54255	1	1	0.991488
GOTERM_BP_FAT	GO:0010657~muscle cell apoptotic process	3	0.877193	0.24383	ENSG00000183072, ENSG00000120899, ENSG00000157168	282	56	16650	3.16299	1	1	0.991488
Annotation Cluster 40	Enrichment Score: 0.7830545092883334
Category	Term	Count	%	PValue	Genes	List Total	Pop Hits	Pop Total	Fold Enrichment	Bonferroni	Benjamini	FDR
GOTERM_BP_FAT	GO:1990778~protein localization to cell periphery	9	2.63158	0.0383539	ENSG00000166126, ENSG00000104863, ENSG00000130545, ENSG00000099864, ENSG00000029534, ENSG00000162878, ENSG00000158445, ENSG00000151025, ENSG00000137312	282	226	16650	2.35125	1	1	0.991488
GOTERM_BP_FAT	GO:0072659~protein localization to plasma membrane	8	2.33918	0.0620314	ENSG00000166126, ENSG00000130545, ENSG00000099864, ENSG00000029534, ENSG00000162878, ENSG00000158445, ENSG00000151025, ENSG00000137312	282	207	16650	2.28184	1	1	0.991488
GOTERM_BP_FAT	GO:0072661~protein targeting to plasma membrane	3	0.877193	0.0707495	ENSG00000099864, ENSG00000029534, ENSG00000158445	282	26	16650	6.8126	1	1	0.991488
GOTERM_BP_FAT	GO:0090002~establishment of protein localization to plasma membrane	6	1.75439	0.0928548	ENSG00000166126, ENSG00000099864, ENSG00000029534, ENSG00000162878, ENSG00000158445, ENSG00000137312	282	142	16650	2.49476	1	1	0.991488
GOTERM_BP_FAT	GO:0007009~plasma membrane organization	9	2.63158	0.0980448	ENSG00000166126, ENSG00000130545, ENSG00000099864, ENSG00000029534, ENSG00000158156, ENSG00000162878, ENSG00000158445, ENSG00000151025, ENSG00000137312	282	277	16650	1.91835	1	1	0.991488
GOTERM_BP_FAT	GO:1902580~single-organism cellular localization	25	7.30994	0.11684	ENSG00000213023, ENSG00000104863, ENSG00000213024, ENSG00000099864, ENSG00000029534, ENSG00000158445, ENSG00000205560, ENSG00000171700, ENSG00000182481, ENSG00000162878, ENSG00000160710, ENSG00000103241, ENSG00000130545, ENSG00000171791, ENSG00000112559, ENSG00000169371, ENSG00000139973, ENSG00000151025, ENSG00000137312, ENSG00000166126, ENSG00000204267, ENSG00000030066, ENSG00000169992, ENSG0000…	282	1102	16650	1.33944	1	1	0.991488
GOTERM_BP_FAT	GO:0044802~single-organism membrane organization	20	5.84795	0.147576	ENSG00000213023, ENSG00000104863, ENSG00000130545, ENSG00000213024, ENSG00000099864, ENSG00000171791, ENSG00000130270, ENSG00000029534, ENSG00000158156, ENSG00000170175, ENSG00000158445, ENSG00000151025, ENSG00000139973, ENSG00000136997, ENSG00000137312, ENSG00000166126, ENSG00000030066, ENSG00000183186, ENSG00000169992, ENSG00000162878	282	866	16650	1.36357	1	1	0.991488
GOTERM_BP_FAT	GO:0061024~membrane organization	21	6.14035	0.285921	ENSG00000213023, ENSG00000104863, ENSG00000130545, ENSG00000213024, ENSG00000099864, ENSG00000065882, ENSG00000171791, ENSG00000130270, ENSG00000029534, ENSG00000158156, ENSG00000170175, ENSG00000158445, ENSG00000151025, ENSG00000139973, ENSG00000136997, ENSG00000137312, ENSG00000166126, ENSG00000030066, ENSG00000183186, ENSG00000169992, ENSG00000162878	282	1027	16650	1.2073	1	1	0.991488
GOTERM_BP_FAT	GO:0072657~protein localization to membrane	11	3.21637	0.312255	ENSG00000166126, ENSG00000104863, ENSG00000130545, ENSG00000099864, ENSG00000169992, ENSG00000171791, ENSG00000029534, ENSG00000162878, ENSG00000158445, ENSG00000151025, ENSG00000137312	282	489	16650	1.32816	1	1	0.991488
GOTERM_BP_FAT	GO:0010256~endomembrane system organization	12	3.50877	0.34502	ENSG00000166126, ENSG00000213024, ENSG00000130545, ENSG00000099864, ENSG00000030066, ENSG00000130270, ENSG00000029534, ENSG00000158156, ENSG00000162878, ENSG00000158445, ENSG00000151025, ENSG00000137312	282	559	16650	1.26746	1	1	0.991488
GOTERM_BP_FAT	GO:0090150~establishment of protein localization to membrane	7	2.04678	0.591219	ENSG00000166126, ENSG00000099864, ENSG00000171791, ENSG00000029534, ENSG00000162878, ENSG00000158445, ENSG00000137312	282	368	16650	1.12309	1	1	0.991488
GOTERM_BP_FAT	GO:0006612~protein targeting to membrane	3	0.877193	0.833718	ENSG00000099864, ENSG00000029534, ENSG00000158445	282	190	16650	0.932251	1	1	0.991488
Annotation Cluster 41	Enrichment Score: 0.7546438134003803
Category	Term	Count	%	PValue	Genes	List Total	Pop Hits	Pop Total	Fold Enrichment	Bonferroni	Benjamini	FDR
GOTERM_BP_FAT	GO:0090596~sensory organ morphogenesis	11	3.21637	0.0101811	ENSG00000171812, ENSG00000137273, ENSG00000112715, ENSG00000166147, ENSG00000188620, ENSG00000115507, ENSG00000171791, ENSG00000180340, ENSG00000109705, ENSG00000159842, ENSG00000161798	282	250	16650	2.59787	1	0.560348	0.555451
GOTERM_BP_FAT	GO:0048592~eye morphogenesis	6	1.75439	0.0992734	ENSG00000171812, ENSG00000137273, ENSG00000112715, ENSG00000166147, ENSG00000171791, ENSG00000161798	282	145	16650	2.44314	1	1	0.991488
GOTERM_BP_FAT	GO:0007423~sensory organ development	13	3.80117	0.151153	ENSG00000112715, ENSG00000115507, ENSG00000180340, ENSG00000171791, ENSG00000109705, ENSG00000159842, ENSG00000171812, ENSG00000137273, ENSG00000166147, ENSG00000188620, ENSG00000102878, ENSG00000142611, ENSG00000161798	282	507	16650	1.51391	1	1	0.991488
GOTERM_BP_FAT	GO:0048593~camera-type eye morphogenesis	4	1.16959	0.270303	ENSG00000171812, ENSG00000137273, ENSG00000112715, ENSG00000161798	282	107	16650	2.2072	1	1	0.991488
GOTERM_BP_FAT	GO:0009791~post-embryonic development	3	0.877193	0.472822	ENSG00000112715, ENSG00000166147, ENSG00000171791	282	94	16650	1.88434	1	1	0.991488
GOTERM_BP_FAT	GO:0001654~eye development	7	2.04678	0.49606	ENSG00000171812, ENSG00000137273, ENSG00000112715, ENSG00000166147, ENSG00000102878, ENSG00000171791, ENSG00000161798	282	334	16650	1.23742	1	1	0.991488
GOTERM_BP_FAT	GO:0043010~camera-type eye development	6	1.75439	0.538723	ENSG00000171812, ENSG00000137273, ENSG00000112715, ENSG00000166147, ENSG00000102878, ENSG00000161798	282	288	16650	1.23005	1	1	0.991488
Annotation Cluster 42	Enrichment Score: 0.75432410213094
Category	Term	Count	%	PValue	Genes	List Total	Pop Hits	Pop Total	Fold Enrichment	Bonferroni	Benjamini	FDR
GOTERM_BP_FAT	GO:0000070~mitotic sister chromatid segregation	8	2.33918	0.0104367	ENSG00000116670, ENSG00000134690, ENSG00000237649, ENSG00000113810, ENSG00000117724, ENSG00000128789, ENSG00000100918, ENSG00000161800	282	142	16650	3.32634	1	0.567237	0.562279
GOTERM_BP_FAT	GO:0051983~regulation of chromosome segregation	5	1.46199	0.0537263	ENSG00000116670, ENSG00000179051, ENSG00000117724, ENSG00000128789, ENSG00000161800	282	84	16650	3.51444	1	1	0.991488
GOTERM_BP_FAT	GO:0007094~mitotic spindle assembly checkpoint	3	0.877193	0.0707495	ENSG00000116670, ENSG00000117724, ENSG00000128789	282	26	16650	6.8126	1	1	0.991488
GOTERM_BP_FAT	GO:0071173~spindle assembly checkpoint	3	0.877193	0.0755846	ENSG00000116670, ENSG00000117724, ENSG00000128789	282	27	16650	6.56028	1	1	0.991488
GOTERM_BP_FAT	GO:0045930~negative regulation of mitotic cell cycle	8	2.33918	0.0784136	ENSG00000154640, ENSG00000116670, ENSG00000171791, ENSG00000117724, ENSG00000128789, ENSG00000116017, ENSG00000183765, ENSG00000180447	282	219	16650	2.15681	1	1	0.991488
GOTERM_BP_FAT	GO:0071174~mitotic spindle checkpoint	3	0.877193	0.106568	ENSG00000116670, ENSG00000117724, ENSG00000128789	282	33	16650	5.3675	1	1	0.991488
GOTERM_BP_FAT	GO:0045841~negative regulation of mitotic metaphase/anaphase transition	3	0.877193	0.106568	ENSG00000116670, ENSG00000117724, ENSG00000128789	282	33	16650	5.3675	1	1	0.991488
GOTERM_BP_FAT	GO:2000816~negative regulation of mitotic sister chromatid separation	3	0.877193	0.106568	ENSG00000116670, ENSG00000117724, ENSG00000128789	282	33	16650	5.3675	1	1	0.991488
GOTERM_BP_FAT	GO:1902100~negative regulation of metaphase/anaphase transition of cell cycle	3	0.877193	0.112019	ENSG00000116670, ENSG00000117724, ENSG00000128789	282	34	16650	5.20964	1	1	0.991488
GOTERM_BP_FAT	GO:0033048~negative regulation of mitotic sister chromatid segregation	3	0.877193	0.117541	ENSG00000116670, ENSG00000117724, ENSG00000128789	282	35	16650	5.06079	1	1	0.991488
GOTERM_BP_FAT	GO:1901991~negative regulation of mitotic cell cycle phase transition	6	1.75439	0.119816	ENSG00000116670, ENSG00000171791, ENSG00000117724, ENSG00000128789, ENSG00000116017, ENSG00000183765	282	154	16650	2.30036	1	1	0.991488
GOTERM_BP_FAT	GO:0051304~chromosome separation	4	1.16959	0.125686	ENSG00000116670, ENSG00000117724, ENSG00000128789, ENSG00000076242	282	73	16650	3.23521	1	1	0.991488
GOTERM_BP_FAT	GO:0033046~negative regulation of sister chromatid segregation	3	0.877193	0.128782	ENSG00000116670, ENSG00000117724, ENSG00000128789	282	37	16650	4.78723	1	1	0.991488
GOTERM_BP_FAT	GO:0051985~negative regulation of chromosome segregation	3	0.877193	0.134493	ENSG00000116670, ENSG00000117724, ENSG00000128789	282	38	16650	4.66125	1	1	0.991488
GOTERM_BP_FAT	GO:0031577~spindle checkpoint	3	0.877193	0.14026	ENSG00000116670, ENSG00000117724, ENSG00000128789	282	39	16650	4.54173	1	1	0.991488
GOTERM_BP_FAT	GO:1901988~negative regulation of cell cycle phase transition	6	1.75439	0.150052	ENSG00000116670, ENSG00000171791, ENSG00000117724, ENSG00000128789, ENSG00000116017, ENSG00000183765	282	166	16650	2.13407	1	1	0.991488
GOTERM_BP_FAT	GO:0007091~metaphase/anaphase transition of mitotic cell cycle	3	0.877193	0.157863	ENSG00000116670, ENSG00000117724, ENSG00000128789	282	42	16650	4.21733	1	1	0.991488
GOTERM_BP_FAT	GO:0045839~negative regulation of mitotic nuclear division	3	0.877193	0.169816	ENSG00000116670, ENSG00000117724, ENSG00000128789	282	44	16650	4.02563	1	1	0.991488
GOTERM_BP_FAT	GO:0030071~regulation of mitotic metaphase/anaphase transition	3	0.877193	0.188011	ENSG00000116670, ENSG00000117724, ENSG00000128789	282	47	16650	3.76867	1	1	0.991488
GOTERM_BP_FAT	GO:1902099~regulation of metaphase/anaphase transition of cell cycle	3	0.877193	0.194135	ENSG00000116670, ENSG00000117724, ENSG00000128789	282	48	16650	3.69016	1	1	0.991488
GOTERM_BP_FAT	GO:0010965~regulation of mitotic sister chromatid separation	3	0.877193	0.200285	ENSG00000116670, ENSG00000117724, ENSG00000128789	282	49	16650	3.61485	1	1	0.991488
GOTERM_BP_FAT	GO:0044784~metaphase/anaphase transition of cell cycle	3	0.877193	0.206457	ENSG00000116670, ENSG00000117724, ENSG00000128789	282	50	16650	3.54255	1	1	0.991488
GOTERM_BP_FAT	GO:0051306~mitotic sister chromatid separation	3	0.877193	0.212649	ENSG00000116670, ENSG00000117724, ENSG00000128789	282	51	16650	3.47309	1	1	0.991488
GOTERM_BP_FAT	GO:0033044~regulation of chromosome organization	8	2.33918	0.215328	ENSG00000112715, ENSG00000116670, ENSG00000102977, ENSG00000181085, ENSG00000117724, ENSG00000128789, ENSG00000136997, ENSG00000162367	282	288	16650	1.64007	1	1	0.991488
GOTERM_BP_FAT	GO:0051784~negative regulation of nuclear division	3	0.877193	0.24383	ENSG00000116670, ENSG00000117724, ENSG00000128789	282	56	16650	3.16299	1	1	0.991488
GOTERM_BP_FAT	GO:0033047~regulation of mitotic sister chromatid segregation	3	0.877193	0.24383	ENSG00000116670, ENSG00000117724, ENSG00000128789	282	56	16650	3.16299	1	1	0.991488
GOTERM_BP_FAT	GO:1901990~regulation of mitotic cell cycle phase transition	8	2.33918	0.275631	ENSG00000116670, ENSG00000171791, ENSG00000164362, ENSG00000179051, ENSG00000117724, ENSG00000128789, ENSG00000116017, ENSG00000183765	282	312	16650	1.51391	1	1	0.991488
GOTERM_BP_FAT	GO:2001251~negative regulation of chromosome organization	4	1.16959	0.279465	ENSG00000116670, ENSG00000102977, ENSG00000117724, ENSG00000128789	282	109	16650	2.1667	1	1	0.991488
GOTERM_BP_FAT	GO:0007093~mitotic cell cycle checkpoint	5	1.46199	0.281298	ENSG00000116670, ENSG00000117724, ENSG00000128789, ENSG00000116017, ENSG00000183765	282	159	16650	1.85668	1	1	0.991488
GOTERM_BP_FAT	GO:0033045~regulation of sister chromatid segregation	3	0.877193	0.312697	ENSG00000116670, ENSG00000117724, ENSG00000128789	282	67	16650	2.6437	1	1	0.991488
GOTERM_BP_FAT	GO:1901987~regulation of cell cycle phase transition	8	2.33918	0.339941	ENSG00000116670, ENSG00000171791, ENSG00000164362, ENSG00000179051, ENSG00000117724, ENSG00000128789, ENSG00000116017, ENSG00000183765	282	336	16650	1.40578	1	1	0.991488
GOTERM_BP_FAT	GO:0010948~negative regulation of cell cycle process	6	1.75439	0.385742	ENSG00000116670, ENSG00000171791, ENSG00000117724, ENSG00000128789, ENSG00000116017, ENSG00000183765	282	240	16650	1.47606	1	1	0.991488
GOTERM_BP_FAT	GO:0007088~regulation of mitotic nuclear division	4	1.16959	0.421729	ENSG00000116670, ENSG00000138160, ENSG00000117724, ENSG00000128789	282	140	16650	1.68693	1	1	0.991488
GOTERM_BP_FAT	GO:0051783~regulation of nuclear division	4	1.16959	0.525312	ENSG00000116670, ENSG00000138160, ENSG00000117724, ENSG00000128789	282	164	16650	1.44006	1	1	0.991488
GOTERM_BP_FAT	GO:0000075~cell cycle checkpoint	5	1.46199	0.542887	ENSG00000116670, ENSG00000117724, ENSG00000128789, ENSG00000116017, ENSG00000183765	282	229	16650	1.28914	1	1	0.991488
GOTERM_BP_FAT	GO:0010639~negative regulation of organelle organization	6	1.75439	0.611395	ENSG00000136108, ENSG00000116670, ENSG00000102977, ENSG00000117724, ENSG00000128789, ENSG00000100300	282	313	16650	1.13181	1	1	0.991488
GOTERM_BP_FAT	GO:0051129~negative regulation of cellular component organization	9	2.63158	0.831247	ENSG00000136108, ENSG00000116670, ENSG00000102977, ENSG00000179051, ENSG00000117724, ENSG00000128789, ENSG00000100300, ENSG00000162878, ENSG00000003402	282	624	16650	0.851575	1	1	0.991488
Annotation Cluster 43	Enrichment Score: 0.7423215287020252
Category	Term	Count	%	PValue	Genes	List Total	Pop Hits	Pop Total	Fold Enrichment	Bonferroni	Benjamini	FDR
GOTERM_BP_FAT	GO:0046578~regulation of Ras protein signal transduction	8	2.33918	0.0572212	ENSG00000213024, ENSG00000137135, ENSG00000197457, ENSG00000157168, ENSG00000240771, ENSG00000159842, ENSG00000137312, ENSG00000185989	282	203	16650	2.3268	1	1	0.991488
GOTERM_BP_FAT	GO:0046580~negative regulation of Ras protein signal transduction	3	0.877193	0.151949	ENSG00000213024, ENSG00000197457, ENSG00000185989	282	41	16650	4.32019	1	1	0.991488
GOTERM_BP_FAT	GO:0051058~negative regulation of small GTPase mediated signal transduction	3	0.877193	0.157863	ENSG00000213024, ENSG00000197457, ENSG00000185989	282	42	16650	4.21733	1	1	0.991488
GOTERM_BP_FAT	GO:1902532~negative regulation of intracellular signal transduction	7	2.04678	0.781952	ENSG00000213024, ENSG00000103490, ENSG00000171791, ENSG00000197457, ENSG00000136997, ENSG00000185989, ENSG00000185070	282	454	16650	0.910348	1	1	0.991488
Annotation Cluster 44	Enrichment Score: 0.7401635447901463
Category	Term	Count	%	PValue	Genes	List Total	Pop Hits	Pop Total	Fold Enrichment	Bonferroni	Benjamini	FDR
GOTERM_BP_FAT	GO:0051310~metaphase plate congression	4	1.16959	0.0471498	ENSG00000134690, ENSG00000237649, ENSG00000117724, ENSG00000076242	282	48	16650	4.92021	1	1	0.991488
GOTERM_BP_FAT	GO:0051303~establishment of chromosome localization	4	1.16959	0.111016	ENSG00000134690, ENSG00000237649, ENSG00000117724, ENSG00000076242	282	69	16650	3.42276	1	1	0.991488
GOTERM_BP_FAT	GO:0050000~chromosome localization	4	1.16959	0.114619	ENSG00000134690, ENSG00000237649, ENSG00000117724, ENSG00000076242	282	70	16650	3.37386	1	1	0.991488
GOTERM_BP_FAT	GO:0051656~establishment of organelle localization	8	2.33918	0.566756	ENSG00000103241, ENSG00000213023, ENSG00000134690, ENSG00000183186, ENSG00000237649, ENSG00000117724, ENSG00000076242, ENSG00000139973	282	420	16650	1.12462	1	1	0.991488
GOTERM_BP_FAT	GO:0051640~organelle localization	9	2.63158	0.585683	ENSG00000103241, ENSG00000213023, ENSG00000134690, ENSG00000169992, ENSG00000183186, ENSG00000237649, ENSG00000117724, ENSG00000076242, ENSG00000139973	282	489	16650	1.08667	1	1	0.991488
Annotation Cluster 45	Enrichment Score: 0.7157519382788933
Category	Term	Count	%	PValue	Genes	List Total	Pop Hits	Pop Total	Fold Enrichment	Bonferroni	Benjamini	FDR
GOTERM_BP_FAT	GO:0033209~tumor necrosis factor-mediated signaling pathway	6	1.75439	0.0866578	ENSG00000103490, ENSG00000120899, ENSG00000215788, ENSG00000120949, ENSG00000227507, ENSG00000174516	282	139	16650	2.5486	1	1	0.991488
GOTERM_BP_FAT	GO:0019221~cytokine-mediated signaling pathway	15	4.38596	0.0875979	ENSG00000185507, ENSG00000126561, ENSG00000103490, ENSG00000215788, ENSG00000120949, ENSG00000174516, ENSG00000185070, ENSG00000142089, ENSG00000185187, ENSG00000204642, ENSG00000120899, ENSG00000204435, ENSG00000185201, ENSG00000227507, ENSG00000160710	282	554	16650	1.59863	1	1	0.991488
GOTERM_BP_FAT	GO:0071356~cellular response to tumor necrosis factor	6	1.75439	0.393162	ENSG00000103490, ENSG00000120899, ENSG00000215788, ENSG00000120949, ENSG00000227507, ENSG00000174516	282	244	16650	1.45187	1	1	0.991488
GOTERM_BP_FAT	GO:0034612~response to tumor necrosis factor	6	1.75439	0.459324	ENSG00000103490, ENSG00000120899, ENSG00000215788, ENSG00000120949, ENSG00000227507, ENSG00000174516	282	263	16650	1.34698	1	1	0.991488
Annotation Cluster 46	Enrichment Score: 0.703414675229392
Category	Term	Count	%	PValue	Genes	List Total	Pop Hits	Pop Total	Fold Enrichment	Bonferroni	Benjamini	FDR
GOTERM_BP_FAT	GO:0002053~positive regulation of mesenchymal cell proliferation	3	0.877193	0.0805214	ENSG00000103241, ENSG00000112715, ENSG00000136997	282	28	16650	6.32599	1	1	0.991488
GOTERM_BP_FAT	GO:0010464~regulation of mesenchymal cell proliferation	3	0.877193	0.12313	ENSG00000103241, ENSG00000112715, ENSG00000136997	282	36	16650	4.92021	1	1	0.991488
GOTERM_BP_FAT	GO:0061138~morphogenesis of a branching epithelium	6	1.75439	0.180583	ENSG00000103241, ENSG00000005073, ENSG00000112715, ENSG00000171791, ENSG00000128714, ENSG00000136997	282	177	16650	2.00144	1	1	0.991488
GOTERM_BP_FAT	GO:0010463~mesenchymal cell proliferation	3	0.877193	0.181914	ENSG00000103241, ENSG00000112715, ENSG00000136997	282	46	16650	3.8506	1	1	0.991488
GOTERM_BP_FAT	GO:0001763~morphogenesis of a branching structure	6	1.75439	0.233907	ENSG00000103241, ENSG00000005073, ENSG00000112715, ENSG00000171791, ENSG00000128714, ENSG00000136997	282	195	16650	1.81669	1	1	0.991488
GOTERM_BP_FAT	GO:0048754~branching morphogenesis of an epithelial tube	5	1.46199	0.236887	ENSG00000103241, ENSG00000005073, ENSG00000112715, ENSG00000171791, ENSG00000136997	282	147	16650	2.00825	1	1	0.991488
GOTERM_BP_FAT	GO:0001701~in utero embryonic development	6	1.75439	0.660233	ENSG00000103241, ENSG00000112715, ENSG00000112559, ENSG00000106538, ENSG00000136997, ENSG00000160710	282	331	16650	1.07026	1	1	0.991488
Annotation Cluster 47	Enrichment Score: 0.6941180520923144
Category	Term	Count	%	PValue	Genes	List Total	Pop Hits	Pop Total	Fold Enrichment	Bonferroni	Benjamini	FDR
GOTERM_BP_FAT	GO:0001960~negative regulation of cytokine-mediated signaling pathway	3	0.877193	0.16382	ENSG00000185187, ENSG00000174516, ENSG00000160710	282	43	16650	4.11925	1	1	0.991488
GOTERM_BP_FAT	GO:0060761~negative regulation of response to cytokine stimulus	3	0.877193	0.188011	ENSG00000185187, ENSG00000174516, ENSG00000160710	282	47	16650	3.76867	1	1	0.991488
GOTERM_BP_FAT	GO:0001959~regulation of cytokine-mediated signaling pathway	5	1.46199	0.222472	ENSG00000185507, ENSG00000185187, ENSG00000103490, ENSG00000174516, ENSG00000160710	282	143	16650	2.06442	1	1	0.991488
GOTERM_BP_FAT	GO:0060759~regulation of response to cytokine stimulus	5	1.46199	0.244176	ENSG00000185507, ENSG00000185187, ENSG00000103490, ENSG00000174516, ENSG00000160710	282	149	16650	1.98129	1	1	0.991488
Annotation Cluster 48	Enrichment Score: 0.6859128679113824
Category	Term	Count	%	PValue	Genes	List Total	Pop Hits	Pop Total	Fold Enrichment	Bonferroni	Benjamini	FDR
GOTERM_BP_FAT	GO:0009435~NAD biosynthetic process	3	0.877193	0.0291439	ENSG00000147813, ENSG00000157064, ENSG00000162882	282	16	16650	11.0705	1	0.924946	0.916862
GOTERM_BP_FAT	GO:0019359~nicotinamide nucleotide biosynthetic process	3	0.877193	0.0401819	ENSG00000147813, ENSG00000157064, ENSG00000162882	282	19	16650	9.32251	1	1	0.991488
GOTERM_BP_FAT	GO:0019363~pyridine nucleotide biosynthetic process	3	0.877193	0.0401819	ENSG00000147813, ENSG00000157064, ENSG00000162882	282	19	16650	9.32251	1	1	0.991488
GOTERM_BP_FAT	GO:0072525~pyridine-containing compound biosynthetic process	3	0.877193	0.0525265	ENSG00000147813, ENSG00000157064, ENSG00000162882	282	22	16650	8.05126	1	1	0.991488
GOTERM_BP_FAT	GO:0019674~NAD metabolic process	3	0.877193	0.262636	ENSG00000147813, ENSG00000157064, ENSG00000162882	282	59	16650	3.00216	1	1	0.991488
GOTERM_BP_FAT	GO:0019362~pyridine nucleotide metabolic process	4	1.16959	0.344073	ENSG00000147813, ENSG00000157064, ENSG00000162882, ENSG00000136997	282	123	16650	1.92008	1	1	0.991488
GOTERM_BP_FAT	GO:0046496~nicotinamide nucleotide metabolic process	4	1.16959	0.344073	ENSG00000147813, ENSG00000157064, ENSG00000162882, ENSG00000136997	282	123	16650	1.92008	1	1	0.991488
GOTERM_BP_FAT	GO:0051188~cofactor biosynthetic process	5	1.46199	0.372903	ENSG00000147813, ENSG00000157064, ENSG00000100300, ENSG00000162882, ENSG00000005882	282	183	16650	1.61318	1	1	0.991488
GOTERM_BP_FAT	GO:0072524~pyridine-containing compound metabolic process	4	1.16959	0.380883	ENSG00000147813, ENSG00000157064, ENSG00000162882, ENSG00000136997	282	131	16650	1.80283	1	1	0.991488
GOTERM_BP_FAT	GO:0006733~oxidoreduction coenzyme metabolic process	4	1.16959	0.417231	ENSG00000147813, ENSG00000157064, ENSG00000162882, ENSG00000136997	282	139	16650	1.69907	1	1	0.991488
GOTERM_BP_FAT	GO:0009108~coenzyme biosynthetic process	4	1.16959	0.435151	ENSG00000147813, ENSG00000157064, ENSG00000162882, ENSG00000005882	282	143	16650	1.65154	1	1	0.991488
GOTERM_BP_FAT	GO:0051186~cofactor metabolic process	6	1.75439	0.78169	ENSG00000147813, ENSG00000157064, ENSG00000100300, ENSG00000162882, ENSG00000005882, ENSG00000136997	282	385	16650	0.920144	1	1	0.991488
GOTERM_BP_FAT	GO:0006732~coenzyme metabolic process	5	1.46199	0.781719	ENSG00000147813, ENSG00000157064, ENSG00000162882, ENSG00000005882, ENSG00000136997	282	315	16650	0.937183	1	1	0.991488
Annotation Cluster 49	Enrichment Score: 0.6845334770343918
Category	Term	Count	%	PValue	Genes	List Total	Pop Hits	Pop Total	Fold Enrichment	Bonferroni	Benjamini	FDR
GOTERM_BP_FAT	GO:0051046~regulation of secretion	20	5.84795	0.0228803	ENSG00000047621, ENSG00000103241, ENSG00000213023, ENSG00000132326, ENSG00000103490, ENSG00000110723, ENSG00000197696, ENSG00000157168, ENSG00000158445, ENSG00000139973, ENSG00000159842, ENSG00000166313, ENSG00000170837, ENSG00000183186, ENSG00000123999, ENSG00000169992, ENSG00000144891, ENSG00000270885, ENSG00000069482, ENSG00000169418	282	683	16650	1.72892	1	0.835998	0.828691
GOTERM_BP_FAT	GO:0046903~secretion	28	8.18713	0.0319752	ENSG00000047621, ENSG00000213023, ENSG00000104863, ENSG00000103490, ENSG00000197696, ENSG00000110723, ENSG00000029534, ENSG00000158445, ENSG00000136997, ENSG00000166313, ENSG00000270885, ENSG00000167525, ENSG00000103241, ENSG00000112715, ENSG00000132326, ENSG00000126561, ENSG00000106538, ENSG00000157168, ENSG00000139973, ENSG00000159842, ENSG00000170837, ENSG00000169992, ENSG00000183186, ENSG0000…	282	1098	16650	1.50564	1	0.979071	0.970514
GOTERM_BP_FAT	GO:0051049~regulation of transport	41	11.9883	0.0412511	ENSG00000047621, ENSG00000127561, ENSG00000213023, ENSG00000213024, ENSG00000103490, ENSG00000197696, ENSG00000110723, ENSG00000158445, ENSG00000136997, ENSG00000171488, ENSG00000171700, ENSG00000166313, ENSG00000183072, ENSG00000120899, ENSG00000100300, ENSG00000162878, ENSG00000270885, ENSG00000124134, ENSG00000180447, ENSG00000103241, ENSG00000112715, ENSG00000132326, ENSG00000171791, ENSG0000…	282	1796	16650	1.34785	1	1	0.991488
GOTERM_BP_FAT	GO:0046887~positive regulation of hormone secretion	6	1.75439	0.0482534	ENSG00000170837, ENSG00000169992, ENSG00000123999, ENSG00000197696, ENSG00000270885, ENSG00000069482	282	117	16650	3.02782	1	1	0.991488
GOTERM_BP_FAT	GO:1903530~regulation of secretion by cell	17	4.97076	0.0687176	ENSG00000047621, ENSG00000103241, ENSG00000213023, ENSG00000132326, ENSG00000103490, ENSG00000110723, ENSG00000197696, ENSG00000158445, ENSG00000139973, ENSG00000159842, ENSG00000166313, ENSG00000170837, ENSG00000183186, ENSG00000123999, ENSG00000169992, ENSG00000270885, ENSG00000069482	282	630	16650	1.59321	1	1	0.991488
GOTERM_BP_FAT	GO:0051047~positive regulation of secretion	11	3.21637	0.0793652	ENSG00000166313, ENSG00000170837, ENSG00000103490, ENSG00000169992, ENSG00000123999, ENSG00000197696, ENSG00000110723, ENSG00000270885, ENSG00000158445, ENSG00000069482, ENSG00000169418	282	355	16650	1.82949	1	1	0.991488
GOTERM_BP_FAT	GO:0023061~signal release	12	3.50877	0.0966012	ENSG00000213023, ENSG00000132326, ENSG00000104863, ENSG00000170837, ENSG00000169992, ENSG00000183186, ENSG00000123999, ENSG00000197696, ENSG00000270885, ENSG00000158445, ENSG00000139973, ENSG00000069482	282	417	16650	1.69907	1	1	0.991488
GOTERM_BP_FAT	GO:0051050~positive regulation of transport	22	6.43275	0.0989933	ENSG00000127561, ENSG00000112715, ENSG00000103490, ENSG00000171791, ENSG00000110723, ENSG00000197696, ENSG00000106538, ENSG00000157168, ENSG00000158445, ENSG00000159842, ENSG00000137312, ENSG00000166313, ENSG00000183072, ENSG00000170837, ENSG00000123999, ENSG00000169992, ENSG00000164362, ENSG00000100300, ENSG00000270885, ENSG00000069482, ENSG00000169418, ENSG00000107201	282	920	16650	1.41189	1	1	0.991488
GOTERM_BP_FAT	GO:1903532~positive regulation of secretion by cell	10	2.92398	0.103264	ENSG00000166313, ENSG00000170837, ENSG00000103490, ENSG00000169992, ENSG00000123999, ENSG00000197696, ENSG00000110723, ENSG00000270885, ENSG00000158445, ENSG00000069482	282	327	16650	1.80558	1	1	0.991488
GOTERM_BP_FAT	GO:0046883~regulation of hormone secretion	8	2.33918	0.139192	ENSG00000132326, ENSG00000170837, ENSG00000169992, ENSG00000123999, ENSG00000197696, ENSG00000270885, ENSG00000158445, ENSG00000069482	282	254	16650	1.85961	1	1	0.991488
GOTERM_BP_FAT	GO:0010817~regulation of hormone levels	12	3.50877	0.181247	ENSG00000132326, ENSG00000170837, ENSG00000187553, ENSG00000182240, ENSG00000169992, ENSG00000123999, ENSG00000197696, ENSG00000114115, ENSG00000270885, ENSG00000158445, ENSG00000069482, ENSG00000175426	282	475	16650	1.4916	1	1	0.991488
GOTERM_BP_FAT	GO:0032940~secretion by cell	21	6.14035	0.201187	ENSG00000047621, ENSG00000103241, ENSG00000112715, ENSG00000213023, ENSG00000132326, ENSG00000104863, ENSG00000103490, ENSG00000110723, ENSG00000197696, ENSG00000106538, ENSG00000029534, ENSG00000158445, ENSG00000139973, ENSG00000159842, ENSG00000166313, ENSG00000170837, ENSG00000183186, ENSG00000123999, ENSG00000169992, ENSG00000270885, ENSG00000069482	282	966	16650	1.28353	1	1	0.991488
GOTERM_BP_FAT	GO:0046879~hormone secretion	8	2.33918	0.232009	ENSG00000132326, ENSG00000170837, ENSG00000169992, ENSG00000123999, ENSG00000197696, ENSG00000270885, ENSG00000158445, ENSG00000069482	282	295	16650	1.60115	1	1	0.991488
GOTERM_BP_FAT	GO:0009914~hormone transport	8	2.33918	0.25995	ENSG00000132326, ENSG00000170837, ENSG00000169992, ENSG00000123999, ENSG00000197696, ENSG00000270885, ENSG00000158445, ENSG00000069482	282	306	16650	1.5436	1	1	0.991488
GOTERM_BP_FAT	GO:0015833~peptide transport	7	2.04678	0.299313	ENSG00000132326, ENSG00000170837, ENSG00000204267, ENSG00000169992, ENSG00000270885, ENSG00000158445, ENSG00000069482	282	268	16650	1.54216	1	1	0.991488
GOTERM_BP_FAT	GO:0046888~negative regulation of hormone secretion	3	0.877193	0.300224	ENSG00000123999, ENSG00000197696, ENSG00000158445	282	65	16650	2.72504	1	1	0.991488
GOTERM_BP_FAT	GO:0042886~amide transport	7	2.04678	0.362189	ENSG00000132326, ENSG00000170837, ENSG00000204267, ENSG00000169992, ENSG00000270885, ENSG00000158445, ENSG00000069482	282	289	16650	1.4301	1	1	0.991488
GOTERM_BP_FAT	GO:0030072~peptide hormone secretion	6	1.75439	0.385861	ENSG00000132326, ENSG00000170837, ENSG00000169992, ENSG00000270885, ENSG00000158445, ENSG00000069482	282	241	16650	1.46994	1	1	0.991488
GOTERM_BP_FAT	GO:0002790~peptide secretion	6	1.75439	0.414607	ENSG00000132326, ENSG00000170837, ENSG00000169992, ENSG00000270885, ENSG00000158445, ENSG00000069482	282	250	16650	1.41702	1	1	0.991488
GOTERM_BP_FAT	GO:0090277~positive regulation of peptide hormone secretion	3	0.877193	0.444725	ENSG00000170837, ENSG00000169992, ENSG00000270885	282	89	16650	1.9902	1	1	0.991488
GOTERM_BP_FAT	GO:0090276~regulation of peptide hormone secretion	5	1.46199	0.445072	ENSG00000132326, ENSG00000170837, ENSG00000169992, ENSG00000270885, ENSG00000158445	282	202	16650	1.46145	1	1	0.991488
GOTERM_BP_FAT	GO:0002791~regulation of peptide secretion	5	1.46199	0.464332	ENSG00000132326, ENSG00000170837, ENSG00000169992, ENSG00000270885, ENSG00000158445	282	207	16650	1.42615	1	1	0.991488
GOTERM_BP_FAT	GO:0071705~nitrogen compound transport	14	4.09357	0.467184	ENSG00000132326, ENSG00000213024, ENSG00000169371, ENSG00000158445, ENSG00000136997, ENSG00000137312, ENSG00000166126, ENSG00000170837, ENSG00000125648, ENSG00000204267, ENSG00000030066, ENSG00000169992, ENSG00000270885, ENSG00000069482	282	725	16650	1.14013	1	1	0.991488
GOTERM_BP_FAT	GO:0002793~positive regulation of peptide secretion	3	0.877193	0.46727	ENSG00000170837, ENSG00000169992, ENSG00000270885	282	93	16650	1.9046	1	1	0.991488
GOTERM_BP_FAT	GO:0030073~insulin secretion	4	1.16959	0.470348	ENSG00000170837, ENSG00000169992, ENSG00000158445, ENSG00000069482	282	151	16650	1.56404	1	1	0.991488
GOTERM_BP_FAT	GO:0090087~regulation of peptide transport	5	1.46199	0.47107	ENSG00000132326, ENSG00000170837, ENSG00000169992, ENSG00000270885, ENSG00000158445	282	209	16650	1.4125	1	1	0.991488
GOTERM_BP_FAT	GO:0050796~regulation of insulin secretion	4	1.16959	0.569855	ENSG00000132326, ENSG00000170837, ENSG00000169992, ENSG00000158445	282	175	16650	1.34954	1	1	0.991488
GOTERM_BP_FAT	GO:0050708~regulation of protein secretion	7	2.04678	0.65222	ENSG00000166313, ENSG00000132326, ENSG00000170837, ENSG00000103490, ENSG00000169992, ENSG00000110723, ENSG00000158445	282	392	16650	1.05433	1	1	0.991488
GOTERM_BP_FAT	GO:0009306~protein secretion	8	2.33918	0.68161	ENSG00000166313, ENSG00000132326, ENSG00000170837, ENSG00000103490, ENSG00000169992, ENSG00000110723, ENSG00000158445, ENSG00000069482	282	469	16650	1.00712	1	1	0.991488
Annotation Cluster 50	Enrichment Score: 0.6795542763474436
Category	Term	Count	%	PValue	Genes	List Total	Pop Hits	Pop Total	Fold Enrichment	Bonferroni	Benjamini	FDR
GOTERM_BP_FAT	GO:0048706~embryonic skeletal system development	5	1.46199	0.15468	ENSG00000005073, ENSG00000109705, ENSG00000112559, ENSG00000123388, ENSG00000092607	282	123	16650	2.4001	1	1	0.991488
GOTERM_BP_FAT	GO:0048704~embryonic skeletal system morphogenesis	4	1.16959	0.207528	ENSG00000005073, ENSG00000112559, ENSG00000123388, ENSG00000092607	282	93	16650	2.53946	1	1	0.991488
GOTERM_BP_FAT	GO:0048705~skeletal system morphogenesis	6	1.75439	0.284988	ENSG00000005073, ENSG00000109705, ENSG00000204335, ENSG00000112559, ENSG00000123388, ENSG00000092607	282	211	16650	1.67894	1	1	0.991488
Annotation Cluster 51	Enrichment Score: 0.6694622842964358
Category	Term	Count	%	PValue	Genes	List Total	Pop Hits	Pop Total	Fold Enrichment	Bonferroni	Benjamini	FDR
GOTERM_BP_FAT	GO:0071310~cellular response to organic substance	45	13.1579	0.120947	ENSG00000185507, ENSG00000158747, ENSG00000214575, ENSG00000213024, ENSG00000103490, ENSG00000215788, ENSG00000120949, ENSG00000158445, ENSG00000005882, ENSG00000174516, ENSG00000136997, ENSG00000171700, ENSG00000185070, ENSG00000183072, ENSG00000142089, ENSG00000120899, ENSG00000204435, ENSG00000204335, ENSG00000055332, ENSG00000149599, ENSG00000100300, ENSG00000160710, ENSG00000180447, ENSG0000…	282	2186	16650	1.21542	1	1	0.991488
GOTERM_BP_FAT	GO:0010033~response to organic substance	54	15.7895	0.215284	ENSG00000185507, ENSG00000213024, ENSG00000103490, ENSG00000120949, ENSG00000170175, ENSG00000158445, ENSG00000171700, ENSG00000185070, ENSG00000204435, ENSG00000055332, ENSG00000100300, ENSG00000180447, ENSG00000164897, ENSG00000103241, ENSG00000112715, ENSG00000104413, ENSG00000171791, ENSG00000159842, ENSG00000064932, ENSG00000137312, ENSG00000165474, ENSG00000185187, ENSG00000113083, ENSG0000…	282	2822	16650	1.1298	1	1	0.991488
GOTERM_BP_FAT	GO:0070887~cellular response to chemical stimulus	48	14.0351	0.376709	ENSG00000185507, ENSG00000158747, ENSG00000214575, ENSG00000213024, ENSG00000103490, ENSG00000215788, ENSG00000120949, ENSG00000158445, ENSG00000005882, ENSG00000174516, ENSG00000136997, ENSG00000171700, ENSG00000185070, ENSG00000183072, ENSG00000142089, ENSG00000125648, ENSG00000120899, ENSG00000204435, ENSG00000204335, ENSG00000055332, ENSG00000149599, ENSG00000100300, ENSG00000160710, ENSG0000…	282	2648	16650	1.07026	1	1	0.991488
Annotation Cluster 52	Enrichment Score: 0.6681134583004184
Category	Term	Count	%	PValue	Genes	List Total	Pop Hits	Pop Total	Fold Enrichment	Bonferroni	Benjamini	FDR
GOTERM_BP_FAT	GO:0030336~negative regulation of cell migration	7	2.04678	0.154798	ENSG00000197381, ENSG00000158747, ENSG00000171791, ENSG00000204435, ENSG00000146674, ENSG00000157168, ENSG00000159842	282	214	16650	1.9313	1	1	0.991488
GOTERM_BP_FAT	GO:2000146~negative regulation of cell motility	7	2.04678	0.186392	ENSG00000197381, ENSG00000158747, ENSG00000171791, ENSG00000204435, ENSG00000146674, ENSG00000157168, ENSG00000159842	282	227	16650	1.8207	1	1	0.991488
GOTERM_BP_FAT	GO:0040013~negative regulation of locomotion	7	2.04678	0.269339	ENSG00000197381, ENSG00000158747, ENSG00000171791, ENSG00000204435, ENSG00000146674, ENSG00000157168, ENSG00000159842	282	258	16650	1.60193	1	1	0.991488
GOTERM_BP_FAT	GO:0051271~negative regulation of cellular component movement	7	2.04678	0.27356	ENSG00000197381, ENSG00000158747, ENSG00000171791, ENSG00000204435, ENSG00000146674, ENSG00000157168, ENSG00000159842	282	259	16650	1.59574	1	1	0.991488
Annotation Cluster 53	Enrichment Score: 0.657797426685277
Category	Term	Count	%	PValue	Genes	List Total	Pop Hits	Pop Total	Fold Enrichment	Bonferroni	Benjamini	FDR
GOTERM_BP_FAT	GO:0010721~negative regulation of cell development	12	3.50877	0.0151575	ENSG00000178764, ENSG00000213694, ENSG00000166147, ENSG00000116670, ENSG00000148803, ENSG00000171791, ENSG00000164362, ENSG00000179051, ENSG00000100300, ENSG00000177508, ENSG00000157168, ENSG00000069482	282	306	16650	2.31539	1	0.727378	0.721021
GOTERM_BP_FAT	GO:0050768~negative regulation of neurogenesis	6	1.75439	0.397856	ENSG00000178764, ENSG00000148803, ENSG00000164362, ENSG00000100300, ENSG00000177508, ENSG00000157168	282	245	16650	1.44594	1	1	0.991488
GOTERM_BP_FAT	GO:0051961~negative regulation of nervous system development	6	1.75439	0.461423	ENSG00000178764, ENSG00000148803, ENSG00000164362, ENSG00000100300, ENSG00000177508, ENSG00000157168	282	264	16650	1.34188	1	1	0.991488
GOTERM_BP_FAT	GO:0045665~negative regulation of neuron differentiation	3	0.877193	0.840154	ENSG00000178764, ENSG00000148803, ENSG00000177508	282	193	16650	0.91776	1	1	0.991488
Annotation Cluster 54	Enrichment Score: 0.6545656819017025
Category	Term	Count	%	PValue	Genes	List Total	Pop Hits	Pop Total	Fold Enrichment	Bonferroni	Benjamini	FDR
GOTERM_BP_FAT	GO:0048469~cell maturation	6	1.75439	0.117441	ENSG00000112715, ENSG00000171791, ENSG00000120899, ENSG00000100918, ENSG00000069482, ENSG00000162367	282	153	16650	2.31539	1	1	0.991488
GOTERM_BP_FAT	GO:0007292~female gamete generation	5	1.46199	0.127174	ENSG00000171791, ENSG00000120899, ENSG00000076242, ENSG00000100918, ENSG00000136997	282	114	16650	2.58959	1	1	0.991488
GOTERM_BP_FAT	GO:0048477~oogenesis	4	1.16959	0.152887	ENSG00000171791, ENSG00000120899, ENSG00000076242, ENSG00000100918	282	80	16650	2.95213	1	1	0.991488
GOTERM_BP_FAT	GO:0048599~oocyte development	3	0.877193	0.175848	ENSG00000171791, ENSG00000120899, ENSG00000100918	282	45	16650	3.93617	1	1	0.991488
GOTERM_BP_FAT	GO:0009994~oocyte differentiation	3	0.877193	0.194135	ENSG00000171791, ENSG00000120899, ENSG00000100918	282	48	16650	3.69016	1	1	0.991488
GOTERM_BP_FAT	GO:0021700~developmental maturation	7	2.04678	0.208252	ENSG00000112715, ENSG00000099864, ENSG00000171791, ENSG00000120899, ENSG00000100918, ENSG00000069482, ENSG00000162367	282	236	16650	1.75126	1	1	0.991488
GOTERM_BP_FAT	GO:0007281~germ cell development	5	1.46199	0.546151	ENSG00000171791, ENSG00000120899, ENSG00000184792, ENSG00000076242, ENSG00000100918	282	230	16650	1.28353	1	1	0.991488
GOTERM_BP_FAT	GO:0022412~cellular process involved in reproduction in multicellular organism	5	1.46199	0.654245	ENSG00000171791, ENSG00000120899, ENSG00000184792, ENSG00000076242, ENSG00000100918	282	264	16650	1.11823	1	1	0.991488
Annotation Cluster 55	Enrichment Score: 0.6364038788200579
Category	Term	Count	%	PValue	Genes	List Total	Pop Hits	Pop Total	Fold Enrichment	Bonferroni	Benjamini	FDR
GOTERM_BP_FAT	GO:1905114~cell surface receptor signaling pathway involved in cell-cell signaling	14	4.09357	0.11086	ENSG00000134758, ENSG00000180340, ENSG00000112559, ENSG00000133067, ENSG00000167191, ENSG00000136997, ENSG00000171700, ENSG00000183072, ENSG00000116670, ENSG00000120899, ENSG00000169992, ENSG00000204435, ENSG00000164362, ENSG00000166823	282	527	16650	1.56849	1	1	0.991488
GOTERM_BP_FAT	GO:0007267~cell-cell signaling	33	9.64912	0.110981	ENSG00000134758, ENSG00000213023, ENSG00000104863, ENSG00000197696, ENSG00000173621, ENSG00000133067, ENSG00000170175, ENSG00000158445, ENSG00000136997, ENSG00000171700, ENSG00000175426, ENSG00000183072, ENSG00000120899, ENSG00000204435, ENSG00000270885, ENSG00000132326, ENSG00000180340, ENSG00000112559, ENSG00000139973, ENSG00000139874, ENSG00000167191, ENSG00000137312, ENSG00000165474, ENSG0000…	282	1517	16650	1.28438	1	1	0.991488
GOTERM_BP_FAT	GO:0016055~Wnt signaling pathway	12	3.50877	0.170296	ENSG00000134758, ENSG00000183072, ENSG00000116670, ENSG00000204435, ENSG00000180340, ENSG00000164362, ENSG00000112559, ENSG00000133067, ENSG00000167191, ENSG00000136997, ENSG00000166823, ENSG00000171700	282	468	16650	1.51391	1	1	0.991488
GOTERM_BP_FAT	GO:0198738~cell-cell signaling by wnt	12	3.50877	0.170754	ENSG00000134758, ENSG00000183072, ENSG00000116670, ENSG00000204435, ENSG00000180340, ENSG00000164362, ENSG00000112559, ENSG00000133067, ENSG00000167191, ENSG00000136997, ENSG00000166823, ENSG00000171700	282	469	16650	1.51068	1	1	0.991488
GOTERM_BP_FAT	GO:0060070~canonical Wnt signaling pathway	8	2.33918	0.203184	ENSG00000183072, ENSG00000116670, ENSG00000180340, ENSG00000133067, ENSG00000167191, ENSG00000136997, ENSG00000166823, ENSG00000171700	282	284	16650	1.66317	1	1	0.991488
GOTERM_BP_FAT	GO:0030111~regulation of Wnt signaling pathway	8	2.33918	0.285739	ENSG00000183072, ENSG00000116670, ENSG00000164362, ENSG00000112559, ENSG00000133067, ENSG00000167191, ENSG00000166823, ENSG00000171700	282	316	16650	1.49475	1	1	0.991488
GOTERM_BP_FAT	GO:0060828~regulation of canonical Wnt signaling pathway	6	1.75439	0.385861	ENSG00000183072, ENSG00000116670, ENSG00000133067, ENSG00000167191, ENSG00000166823, ENSG00000171700	282	241	16650	1.46994	1	1	0.991488
GOTERM_BP_FAT	GO:0030178~negative regulation of Wnt signaling pathway	5	1.46199	0.441249	ENSG00000183072, ENSG00000116670, ENSG00000112559, ENSG00000166823, ENSG00000171700	282	201	16650	1.46872	1	1	0.991488
GOTERM_BP_FAT	GO:0090090~negative regulation of canonical Wnt signaling pathway	4	1.16959	0.529414	ENSG00000183072, ENSG00000116670, ENSG00000166823, ENSG00000171700	282	165	16650	1.43133	1	1	0.991488
Annotation Cluster 56	Enrichment Score: 0.625799817529163
Category	Term	Count	%	PValue	Genes	List Total	Pop Hits	Pop Total	Fold Enrichment	Bonferroni	Benjamini	FDR
GOTERM_BP_FAT	GO:0022607~cellular component assembly	57	16.6667	0.0336071	ENSG00000104147, ENSG00000213024, ENSG00000103490, ENSG00000099864, ENSG00000196367, ENSG00000158445, ENSG00000003402, ENSG00000073150, ENSG00000185070, ENSG00000151725, ENSG00000204435, ENSG00000055332, ENSG00000079308, ENSG00000141696, ENSG00000112715, ENSG00000196230, ENSG00000181991, ENSG00000171791, ENSG00000237649, ENSG00000117724, ENSG00000005339, ENSG00000137312, ENSG00000174547, ENSG0000…	282	2618	16650	1.28549	1	0.992426	0.983753
GOTERM_BP_FAT	GO:0044085~cellular component biogenesis	60	17.5439	0.0723618	ENSG00000104147, ENSG00000213024, ENSG00000103490, ENSG00000099864, ENSG00000196367, ENSG00000158445, ENSG00000003402, ENSG00000073150, ENSG00000185070, ENSG00000151725, ENSG00000204435, ENSG00000055332, ENSG00000079308, ENSG00000141696, ENSG00000112715, ENSG00000196230, ENSG00000181991, ENSG00000171791, ENSG00000237649, ENSG00000117724, ENSG00000005339, ENSG00000137312, ENSG00000174547, ENSG0000…	282	2914	16650	1.2157	1	1	0.991488
GOTERM_BP_FAT	GO:0071822~protein complex subunit organization	35	10.2339	0.14719	ENSG00000104321, ENSG00000104147, ENSG00000213024, ENSG00000103490, ENSG00000107957, ENSG00000113810, ENSG00000196367, ENSG00000197457, ENSG00000158445, ENSG00000136997, ENSG00000073150, ENSG00000183072, ENSG00000169126, ENSG00000151725, ENSG00000120899, ENSG00000204435, ENSG00000055332, ENSG00000124134, ENSG00000112715, ENSG00000136108, ENSG00000181991, ENSG00000180340, ENSG00000117724, ENSG0000…	282	1674	16650	1.23446	1	1	0.991488
GOTERM_BP_FAT	GO:0006461~protein complex assembly	27	7.89474	0.395665	ENSG00000104321, ENSG00000104147, ENSG00000213024, ENSG00000103490, ENSG00000107957, ENSG00000196367, ENSG00000158445, ENSG00000136997, ENSG00000073150, ENSG00000183072, ENSG00000169126, ENSG00000151725, ENSG00000120899, ENSG00000204435, ENSG00000055332, ENSG00000124134, ENSG00000112715, ENSG00000117724, ENSG00000157168, ENSG00000005339, ENSG00000137312, ENSG00000144712, ENSG00000140350, ENSG0000…	282	1445	16650	1.10322	1	1	0.991488
GOTERM_BP_FAT	GO:0070271~protein complex biogenesis	27	7.89474	0.397068	ENSG00000104321, ENSG00000104147, ENSG00000213024, ENSG00000103490, ENSG00000107957, ENSG00000196367, ENSG00000158445, ENSG00000136997, ENSG00000073150, ENSG00000183072, ENSG00000169126, ENSG00000151725, ENSG00000120899, ENSG00000204435, ENSG00000055332, ENSG00000124134, ENSG00000112715, ENSG00000117724, ENSG00000157168, ENSG00000005339, ENSG00000137312, ENSG00000144712, ENSG00000140350, ENSG0000…	282	1446	16650	1.10245	1	1	0.991488
GOTERM_BP_FAT	GO:0065003~macromolecular complex assembly	31	9.06433	0.439635	ENSG00000104321, ENSG00000104147, ENSG00000213024, ENSG00000103490, ENSG00000107957, ENSG00000196367, ENSG00000158445, ENSG00000136997, ENSG00000073150, ENSG00000183072, ENSG00000169126, ENSG00000151725, ENSG00000120899, ENSG00000204435, ENSG00000055332, ENSG00000160710, ENSG00000124134, ENSG00000112715, ENSG00000181991, ENSG00000117724, ENSG00000157168, ENSG00000169371, ENSG00000005339, ENSG0000…	282	1710	16650	1.07036	1	1	0.991488
GOTERM_BP_FAT	GO:0043933~macromolecular complex subunit organization	43	12.5731	0.494601	ENSG00000104321, ENSG00000104147, ENSG00000213024, ENSG00000103490, ENSG00000107957, ENSG00000113810, ENSG00000196367, ENSG00000197457, ENSG00000158445, ENSG00000136997, ENSG00000073150, ENSG00000166313, ENSG00000183072, ENSG00000169126, ENSG00000151725, ENSG00000120899, ENSG00000204435, ENSG00000055332, ENSG00000160710, ENSG00000124134, ENSG00000124795, ENSG00000112715, ENSG00000136108, ENSG0000…	282	2461	16650	1.03163	1	1	0.991488
GOTERM_BP_FAT	GO:0034622~cellular macromolecular complex assembly	15	4.38596	0.80583	ENSG00000104147, ENSG00000181991, ENSG00000103490, ENSG00000117724, ENSG00000157168, ENSG00000169371, ENSG00000174547, ENSG00000144712, ENSG00000140350, ENSG00000169126, ENSG00000151725, ENSG00000120899, ENSG00000204435, ENSG00000128789, ENSG00000160710	282	1004	16650	0.88211	1	1	0.991488
Annotation Cluster 57	Enrichment Score: 0.621337069582443
Category	Term	Count	%	PValue	Genes	List Total	Pop Hits	Pop Total	Fold Enrichment	Bonferroni	Benjamini	FDR
GOTERM_BP_FAT	GO:0007417~central nervous system development	21	6.14035	0.13356	ENSG00000127561, ENSG00000130675, ENSG00000115507, ENSG00000092621, ENSG00000171791, ENSG00000197587, ENSG00000081479, ENSG00000117724, ENSG00000157168, ENSG00000170485, ENSG00000139874, ENSG00000136997, ENSG00000159842, ENSG00000164066, ENSG00000184271, ENSG00000169126, ENSG00000188620, ENSG00000187553, ENSG00000089116, ENSG00000142700, ENSG00000162367	282	904	16650	1.37156	1	1	0.991488
GOTERM_BP_FAT	GO:0007420~brain development	16	4.67836	0.182702	ENSG00000127561, ENSG00000115507, ENSG00000092621, ENSG00000171791, ENSG00000197587, ENSG00000081479, ENSG00000117724, ENSG00000157168, ENSG00000139874, ENSG00000136997, ENSG00000159842, ENSG00000184271, ENSG00000169126, ENSG00000188620, ENSG00000089116, ENSG00000142700	282	684	16650	1.38111	1	1	0.991488
GOTERM_BP_FAT	GO:0060322~head development	16	4.67836	0.234161	ENSG00000127561, ENSG00000115507, ENSG00000092621, ENSG00000171791, ENSG00000197587, ENSG00000081479, ENSG00000117724, ENSG00000157168, ENSG00000139874, ENSG00000136997, ENSG00000159842, ENSG00000184271, ENSG00000169126, ENSG00000188620, ENSG00000089116, ENSG00000142700	282	720	16650	1.31206	1	1	0.991488
GOTERM_BP_FAT	GO:0030900~forebrain development	7	2.04678	0.572423	ENSG00000115507, ENSG00000089116, ENSG00000081479, ENSG00000157168, ENSG00000142700, ENSG00000139874, ENSG00000136997	282	361	16650	1.14487	1	1	0.991488
Annotation Cluster 58	Enrichment Score: 0.6148195830651559
Category	Term	Count	%	PValue	Genes	List Total	Pop Hits	Pop Total	Fold Enrichment	Bonferroni	Benjamini	FDR
GOTERM_BP_FAT	GO:0030823~regulation of cGMP metabolic process	5	1.46199	0.0011814	ENSG00000112715, ENSG00000180340, ENSG00000120899, ENSG00000169418, ENSG00000152402	282	28	16650	10.5433	0.994141	0.139771	0.13855
GOTERM_BP_FAT	GO:1900542~regulation of purine nucleotide metabolic process	9	2.63158	0.0233336	ENSG00000112715, ENSG00000125648, ENSG00000099864, ENSG00000180340, ENSG00000120899, ENSG00000100300, ENSG00000136997, ENSG00000169418, ENSG00000152402	282	205	16650	2.59211	1	0.838468	0.83114
GOTERM_BP_FAT	GO:0006140~regulation of nucleotide metabolic process	9	2.63158	0.0277777	ENSG00000112715, ENSG00000125648, ENSG00000099864, ENSG00000180340, ENSG00000120899, ENSG00000100300, ENSG00000136997, ENSG00000169418, ENSG00000152402	282	212	16650	2.50652	1	0.924946	0.916862
GOTERM_BP_FAT	GO:0046068~cGMP metabolic process	4	1.16959	0.0379011	ENSG00000180340, ENSG00000120899, ENSG00000169418, ENSG00000152402	282	44	16650	5.3675	1	1	0.991488
GOTERM_BP_FAT	GO:0009165~nucleotide biosynthetic process	11	3.21637	0.0402389	ENSG00000147813, ENSG00000099864, ENSG00000157064, ENSG00000120899, ENSG00000103202, ENSG00000162882, ENSG00000136997, ENSG00000169418, ENSG00000154027, ENSG00000152402, ENSG00000128951	282	313	16650	2.07498	1	1	0.991488
GOTERM_BP_FAT	GO:1901293~nucleoside phosphate biosynthetic process	11	3.21637	0.0424979	ENSG00000147813, ENSG00000099864, ENSG00000157064, ENSG00000120899, ENSG00000103202, ENSG00000162882, ENSG00000136997, ENSG00000169418, ENSG00000154027, ENSG00000152402, ENSG00000128951	282	316	16650	2.05528	1	1	0.991488
GOTERM_BP_FAT	GO:0030825~positive regulation of cGMP metabolic process	3	0.877193	0.0482764	ENSG00000180340, ENSG00000169418, ENSG00000152402	282	21	16650	8.43465	1	1	0.991488
GOTERM_BP_FAT	GO:0030826~regulation of cGMP biosynthetic process	3	0.877193	0.0525265	ENSG00000120899, ENSG00000169418, ENSG00000152402	282	22	16650	8.05126	1	1	0.991488
GOTERM_BP_FAT	GO:0030799~regulation of cyclic nucleotide metabolic process	6	1.75439	0.119816	ENSG00000112715, ENSG00000099864, ENSG00000180340, ENSG00000120899, ENSG00000169418, ENSG00000152402	282	154	16650	2.30036	1	1	0.991488
GOTERM_BP_FAT	GO:0009117~nucleotide metabolic process	16	4.67836	0.15926	ENSG00000112715, ENSG00000099864, ENSG00000180340, ENSG00000136997, ENSG00000152402, ENSG00000154027, ENSG00000147813, ENSG00000125648, ENSG00000120899, ENSG00000157064, ENSG00000100300, ENSG00000103202, ENSG00000162882, ENSG00000169418, ENSG00000140398, ENSG00000128951	282	667	16650	1.41631	1	1	0.991488
GOTERM_BP_FAT	GO:0006753~nucleoside phosphate metabolic process	16	4.67836	0.169858	ENSG00000112715, ENSG00000099864, ENSG00000180340, ENSG00000136997, ENSG00000152402, ENSG00000154027, ENSG00000147813, ENSG00000125648, ENSG00000120899, ENSG00000157064, ENSG00000100300, ENSG00000103202, ENSG00000162882, ENSG00000169418, ENSG00000140398, ENSG00000128951	282	675	16650	1.39953	1	1	0.991488
GOTERM_BP_FAT	GO:1900371~regulation of purine nucleotide biosynthetic process	5	1.46199	0.211821	ENSG00000099864, ENSG00000120899, ENSG00000136997, ENSG00000169418, ENSG00000152402	282	140	16650	2.10866	1	1	0.991488
GOTERM_BP_FAT	GO:0030808~regulation of nucleotide biosynthetic process	5	1.46199	0.215355	ENSG00000099864, ENSG00000120899, ENSG00000136997, ENSG00000169418, ENSG00000152402	282	141	16650	2.09371	1	1	0.991488
GOTERM_BP_FAT	GO:0009187~cyclic nucleotide metabolic process	6	1.75439	0.216002	ENSG00000112715, ENSG00000099864, ENSG00000180340, ENSG00000120899, ENSG00000169418, ENSG00000152402	282	190	16650	1.8645	1	1	0.991488
GOTERM_BP_FAT	GO:0055086~nucleobase-containing small molecule metabolic process	16	4.67836	0.248101	ENSG00000112715, ENSG00000099864, ENSG00000180340, ENSG00000136997, ENSG00000152402, ENSG00000154027, ENSG00000147813, ENSG00000125648, ENSG00000120899, ENSG00000157064, ENSG00000100300, ENSG00000103202, ENSG00000162882, ENSG00000169418, ENSG00000140398, ENSG00000128951	282	728	16650	1.29764	1	1	0.991488
GOTERM_BP_FAT	GO:0006164~purine nucleotide biosynthetic process	7	2.04678	0.253619	ENSG00000099864, ENSG00000120899, ENSG00000103202, ENSG00000136997, ENSG00000169418, ENSG00000154027, ENSG00000152402	282	252	16650	1.64007	1	1	0.991488
GOTERM_BP_FAT	GO:0072522~purine-containing compound biosynthetic process	7	2.04678	0.285985	ENSG00000099864, ENSG00000120899, ENSG00000103202, ENSG00000136997, ENSG00000169418, ENSG00000154027, ENSG00000152402	282	263	16650	1.57147	1	1	0.991488
GOTERM_BP_FAT	GO:1901566~organonitrogen compound biosynthetic process	26	7.60234	0.378349	ENSG00000214575, ENSG00000099864, ENSG00000136997, ENSG00000152402, ENSG00000154027, ENSG00000175426, ENSG00000147813, ENSG00000125648, ENSG00000120899, ENSG00000055332, ENSG00000162512, ENSG00000141934, ENSG00000125821, ENSG00000100300, ENSG00000160710, ENSG00000128951, ENSG00000132326, ENSG00000174684, ENSG00000181991, ENSG00000092621, ENSG00000174547, ENSG00000086504, ENSG00000157064, ENSG0000…	282	1375	16650	1.11644	1	1	0.991488
GOTERM_BP_FAT	GO:1900544~positive regulation of purine nucleotide metabolic process	4	1.16959	0.380883	ENSG00000180340, ENSG00000136997, ENSG00000169418, ENSG00000152402	282	131	16650	1.80283	1	1	0.991488
GOTERM_BP_FAT	GO:0045981~positive regulation of nucleotide metabolic process	4	1.16959	0.380883	ENSG00000180340, ENSG00000136997, ENSG00000169418, ENSG00000152402	282	131	16650	1.80283	1	1	0.991488
GOTERM_BP_FAT	GO:0090407~organophosphate biosynthetic process	12	3.50877	0.384538	ENSG00000120697, ENSG00000147813, ENSG00000099864, ENSG00000157064, ENSG00000120899, ENSG00000103202, ENSG00000162882, ENSG00000136997, ENSG00000169418, ENSG00000154027, ENSG00000152402, ENSG00000128951	282	572	16650	1.23865	1	1	0.991488
GOTERM_BP_FAT	GO:0030802~regulation of cyclic nucleotide biosynthetic process	4	1.16959	0.385457	ENSG00000099864, ENSG00000120899, ENSG00000169418, ENSG00000152402	282	132	16650	1.78917	1	1	0.991488
GOTERM_BP_FAT	GO:0009152~purine ribonucleotide biosynthetic process	6	1.75439	0.397856	ENSG00000099864, ENSG00000103202, ENSG00000136997, ENSG00000169418, ENSG00000154027, ENSG00000152402	282	245	16650	1.44594	1	1	0.991488
GOTERM_BP_FAT	GO:0009260~ribonucleotide biosynthetic process	6	1.75439	0.438832	ENSG00000099864, ENSG00000103202, ENSG00000136997, ENSG00000169418, ENSG00000154027, ENSG00000152402	282	258	16650	1.37308	1	1	0.991488
GOTERM_BP_FAT	GO:0006163~purine nucleotide metabolic process	11	3.21637	0.443647	ENSG00000112715, ENSG00000125648, ENSG00000099864, ENSG00000180340, ENSG00000120899, ENSG00000100300, ENSG00000103202, ENSG00000136997, ENSG00000169418, ENSG00000154027, ENSG00000152402	282	547	16650	1.18733	1	1	0.991488
GOTERM_BP_FAT	GO:1901135~carbohydrate derivative metabolic process	23	6.72515	0.443756	ENSG00000174684, ENSG00000099864, ENSG00000180340, ENSG00000171791, ENSG00000081479, ENSG00000136997, ENSG00000152402, ENSG00000154027, ENSG00000100626, ENSG00000120697, ENSG00000125648, ENSG00000162066, ENSG00000182240, ENSG00000169255, ENSG00000120899, ENSG00000162512, ENSG00000073849, ENSG00000182870, ENSG00000100300, ENSG00000103202, ENSG00000169418, ENSG00000140398, ENSG00000128951	282	1247	16650	1.089	1	1	0.991488
GOTERM_BP_FAT	GO:0046390~ribose phosphate biosynthetic process	6	1.75439	0.451179	ENSG00000099864, ENSG00000103202, ENSG00000136997, ENSG00000169418, ENSG00000154027, ENSG00000152402	282	261	16650	1.3573	1	1	0.991488
GOTERM_BP_FAT	GO:0009190~cyclic nucleotide biosynthetic process	4	1.16959	0.461637	ENSG00000099864, ENSG00000120899, ENSG00000169418, ENSG00000152402	282	149	16650	1.58503	1	1	0.991488
GOTERM_BP_FAT	GO:0072521~purine-containing compound metabolic process	11	3.21637	0.495307	ENSG00000112715, ENSG00000125648, ENSG00000099864, ENSG00000180340, ENSG00000120899, ENSG00000100300, ENSG00000103202, ENSG00000136997, ENSG00000169418, ENSG00000154027, ENSG00000152402	282	575	16650	1.12951	1	1	0.991488
GOTERM_BP_FAT	GO:0019637~organophosphate metabolic process	20	5.84795	0.498841	ENSG00000112715, ENSG00000099864, ENSG00000180340, ENSG00000157168, ENSG00000136997, ENSG00000152402, ENSG00000154027, ENSG00000120697, ENSG00000147813, ENSG00000125648, ENSG00000120899, ENSG00000157064, ENSG00000141934, ENSG00000100300, ENSG00000103202, ENSG00000162882, ENSG00000169418, ENSG00000140398, ENSG00000167525, ENSG00000128951	282	1108	16650	1.06575	1	1	0.991488
GOTERM_BP_FAT	GO:0009150~purine ribonucleotide metabolic process	10	2.92398	0.518944	ENSG00000125648, ENSG00000099864, ENSG00000180340, ENSG00000120899, ENSG00000100300, ENSG00000103202, ENSG00000136997, ENSG00000169418, ENSG00000154027, ENSG00000152402	282	520	16650	1.13543	1	1	0.991488
GOTERM_BP_FAT	GO:0030810~positive regulation of nucleotide biosynthetic process	3	0.877193	0.521172	ENSG00000136997, ENSG00000169418, ENSG00000152402	282	103	16650	1.71969	1	1	0.991488
GOTERM_BP_FAT	GO:1900373~positive regulation of purine nucleotide biosynthetic process	3	0.877193	0.521172	ENSG00000136997, ENSG00000169418, ENSG00000152402	282	103	16650	1.71969	1	1	0.991488
GOTERM_BP_FAT	GO:0030801~positive regulation of cyclic nucleotide metabolic process	3	0.877193	0.541692	ENSG00000180340, ENSG00000169418, ENSG00000152402	282	107	16650	1.6554	1	1	0.991488
GOTERM_BP_FAT	GO:0009259~ribonucleotide metabolic process	10	2.92398	0.551525	ENSG00000125648, ENSG00000099864, ENSG00000180340, ENSG00000120899, ENSG00000100300, ENSG00000103202, ENSG00000136997, ENSG00000169418, ENSG00000154027, ENSG00000152402	282	535	16650	1.1036	1	1	0.991488
GOTERM_BP_FAT	GO:0019693~ribose phosphate metabolic process	10	2.92398	0.582839	ENSG00000125648, ENSG00000099864, ENSG00000180340, ENSG00000120899, ENSG00000100300, ENSG00000103202, ENSG00000136997, ENSG00000169418, ENSG00000154027, ENSG00000152402	282	549	16650	1.07546	1	1	0.991488
GOTERM_BP_FAT	GO:0009205~purine ribonucleoside triphosphate metabolic process	5	1.46199	0.662938	ENSG00000125648, ENSG00000100300, ENSG00000103202, ENSG00000136997, ENSG00000154027	282	267	16650	1.10567	1	1	0.991488
GOTERM_BP_FAT	GO:0009199~ribonucleoside triphosphate metabolic process	5	1.46199	0.679876	ENSG00000125648, ENSG00000100300, ENSG00000103202, ENSG00000136997, ENSG00000154027	282	273	16650	1.08137	1	1	0.991488
GOTERM_BP_FAT	GO:0009144~purine nucleoside triphosphate metabolic process	5	1.46199	0.68264	ENSG00000125648, ENSG00000100300, ENSG00000103202, ENSG00000136997, ENSG00000154027	282	274	16650	1.07742	1	1	0.991488
GOTERM_BP_FAT	GO:0052652~cyclic purine nucleotide metabolic process	3	0.877193	0.709193	ENSG00000099864, ENSG00000169418, ENSG00000152402	282	146	16650	1.2132	1	1	0.991488
GOTERM_BP_FAT	GO:0046128~purine ribonucleoside metabolic process	5	1.46199	0.854651	ENSG00000125648, ENSG00000100300, ENSG00000103202, ENSG00000136997, ENSG00000154027	282	356	16650	0.829249	1	1	0.991488
GOTERM_BP_FAT	GO:0042278~purine nucleoside metabolic process	5	1.46199	0.859072	ENSG00000125648, ENSG00000100300, ENSG00000103202, ENSG00000136997, ENSG00000154027	282	359	16650	0.82232	1	1	0.991488
GOTERM_BP_FAT	GO:0009119~ribonucleoside metabolic process	5	1.46199	0.892804	ENSG00000125648, ENSG00000100300, ENSG00000103202, ENSG00000136997, ENSG00000154027	282	385	16650	0.766786	1	1	0.991488
Annotation Cluster 59	Enrichment Score: 0.6123927288592161
Category	Term	Count	%	PValue	Genes	List Total	Pop Hits	Pop Total	Fold Enrichment	Bonferroni	Benjamini	FDR
GOTERM_BP_FAT	GO:0051701~interaction with host	6	1.75439	0.12954	ENSG00000142089, ENSG00000204267, ENSG00000182481, ENSG00000055332, ENSG00000185201, ENSG00000136997	282	158	16650	2.24212	1	1	0.991488
GOTERM_BP_FAT	GO:0019048~modulation by virus of host morphology or physiology	3	0.877193	0.134493	ENSG00000182481, ENSG00000055332, ENSG00000136997	282	38	16650	4.66125	1	1	0.991488
GOTERM_BP_FAT	GO:0044003~modification by symbiont of host morphology or physiology	3	0.877193	0.188011	ENSG00000182481, ENSG00000055332, ENSG00000136997	282	47	16650	3.76867	1	1	0.991488
GOTERM_BP_FAT	GO:0051817~modification of morphology or physiology of other organism involved in symbiotic interaction	3	0.877193	0.46727	ENSG00000182481, ENSG00000055332, ENSG00000136997	282	93	16650	1.9046	1	1	0.991488
GOTERM_BP_FAT	GO:0035821~modification of morphology or physiology of other organism	3	0.877193	0.566475	ENSG00000182481, ENSG00000055332, ENSG00000136997	282	112	16650	1.5815	1	1	0.991488
Annotation Cluster 60	Enrichment Score: 0.603636840184464
Category	Term	Count	%	PValue	Genes	List Total	Pop Hits	Pop Total	Fold Enrichment	Bonferroni	Benjamini	FDR
GOTERM_BP_FAT	GO:0021510~spinal cord development	5	1.46199	0.0866269	ENSG00000164066, ENSG00000130675, ENSG00000092621, ENSG00000089116, ENSG00000162367	282	99	16650	2.98195	1	1	0.991488
GOTERM_BP_FAT	GO:0021515~cell differentiation in spinal cord	3	0.877193	0.225084	ENSG00000130675, ENSG00000089116, ENSG00000162367	282	53	16650	3.34203	1	1	0.991488
GOTERM_BP_FAT	GO:0021953~central nervous system neuron differentiation	3	0.877193	0.792668	ENSG00000130675, ENSG00000089116, ENSG00000162367	282	173	16650	1.02386	1	1	0.991488
Annotation Cluster 61	Enrichment Score: 0.5949661704214834
Category	Term	Count	%	PValue	Genes	List Total	Pop Hits	Pop Total	Fold Enrichment	Bonferroni	Benjamini	FDR
GOTERM_BP_FAT	GO:0042981~regulation of apoptotic process	31	9.06433	0.104144	ENSG00000185507, ENSG00000213024, ENSG00000103490, ENSG00000215788, ENSG00000120949, ENSG00000158445, ENSG00000174516, ENSG00000136997, ENSG00000003402, ENSG00000166313, ENSG00000183072, ENSG00000120899, ENSG00000055332, ENSG00000100300, ENSG00000160710, ENSG00000180447, ENSG00000112715, ENSG00000171791, ENSG00000109705, ENSG00000157168, ENSG00000005339, ENSG00000159842, ENSG00000139211, ENSG0000…	282	1400	16650	1.30737	1	1	0.991488
GOTERM_BP_FAT	GO:0043067~regulation of programmed cell death	31	9.06433	0.11333	ENSG00000185507, ENSG00000213024, ENSG00000103490, ENSG00000215788, ENSG00000120949, ENSG00000158445, ENSG00000174516, ENSG00000136997, ENSG00000003402, ENSG00000166313, ENSG00000183072, ENSG00000120899, ENSG00000055332, ENSG00000100300, ENSG00000160710, ENSG00000180447, ENSG00000112715, ENSG00000171791, ENSG00000109705, ENSG00000157168, ENSG00000005339, ENSG00000159842, ENSG00000139211, ENSG0000…	282	1413	16650	1.29534	1	1	0.991488
GOTERM_BP_FAT	GO:0010941~regulation of cell death	32	9.35673	0.146161	ENSG00000185507, ENSG00000213024, ENSG00000103490, ENSG00000215788, ENSG00000120949, ENSG00000158445, ENSG00000174516, ENSG00000136997, ENSG00000003402, ENSG00000166313, ENSG00000183072, ENSG00000120899, ENSG00000055332, ENSG00000100300, ENSG00000160710, ENSG00000180447, ENSG00000112715, ENSG00000171791, ENSG00000109705, ENSG00000157168, ENSG00000170485, ENSG00000005339, ENSG00000159842, ENSG0000…	282	1509	16650	1.25206	1	1	0.991488
GOTERM_BP_FAT	GO:0008219~cell death	38	11.1111	0.255042	ENSG00000185507, ENSG00000213024, ENSG00000103490, ENSG00000215788, ENSG00000120949, ENSG00000076242, ENSG00000158445, ENSG00000005882, ENSG00000174516, ENSG00000136997, ENSG00000003402, ENSG00000171700, ENSG00000166313, ENSG00000183072, ENSG00000120899, ENSG00000055332, ENSG00000183773, ENSG00000100300, ENSG00000160710, ENSG00000180447, ENSG00000112715, ENSG00000136108, ENSG00000171791, ENSG0000…	282	1958	16650	1.14587	1	1	0.991488
GOTERM_BP_FAT	GO:0012501~programmed cell death	36	10.5263	0.262572	ENSG00000185507, ENSG00000213024, ENSG00000103490, ENSG00000215788, ENSG00000120949, ENSG00000076242, ENSG00000158445, ENSG00000005882, ENSG00000174516, ENSG00000136997, ENSG00000003402, ENSG00000166313, ENSG00000183072, ENSG00000120899, ENSG00000055332, ENSG00000183773, ENSG00000100300, ENSG00000160710, ENSG00000180447, ENSG00000112715, ENSG00000136108, ENSG00000171791, ENSG00000109705, ENSG0000…	282	1852	16650	1.1477	1	1	0.991488
GOTERM_BP_FAT	GO:0043066~negative regulation of apoptotic process	16	4.67836	0.410437	ENSG00000185507, ENSG00000112715, ENSG00000213024, ENSG00000171791, ENSG00000109705, ENSG00000157168, ENSG00000174516, ENSG00000136997, ENSG00000003402, ENSG00000183072, ENSG00000139211, ENSG00000120899, ENSG00000164362, ENSG00000055332, ENSG00000128789, ENSG00000160710	282	818	16650	1.15487	1	1	0.991488
GOTERM_BP_FAT	GO:0043069~negative regulation of programmed cell death	16	4.67836	0.424454	ENSG00000185507, ENSG00000112715, ENSG00000213024, ENSG00000171791, ENSG00000109705, ENSG00000157168, ENSG00000174516, ENSG00000136997, ENSG00000003402, ENSG00000183072, ENSG00000139211, ENSG00000120899, ENSG00000164362, ENSG00000055332, ENSG00000128789, ENSG00000160710	282	829	16650	1.13954	1	1	0.991488
GOTERM_BP_FAT	GO:0060548~negative regulation of cell death	17	4.97076	0.449251	ENSG00000185507, ENSG00000112715, ENSG00000213024, ENSG00000171791, ENSG00000109705, ENSG00000157168, ENSG00000170485, ENSG00000174516, ENSG00000136997, ENSG00000003402, ENSG00000183072, ENSG00000139211, ENSG00000120899, ENSG00000164362, ENSG00000055332, ENSG00000128789, ENSG00000160710	282	897	16650	1.11898	1	1	0.991488
GOTERM_BP_FAT	GO:0006915~apoptotic process	31	9.06433	0.488732	ENSG00000185507, ENSG00000213024, ENSG00000103490, ENSG00000215788, ENSG00000120949, ENSG00000076242, ENSG00000158445, ENSG00000005882, ENSG00000174516, ENSG00000136997, ENSG00000003402, ENSG00000166313, ENSG00000183072, ENSG00000120899, ENSG00000055332, ENSG00000183773, ENSG00000100300, ENSG00000160710, ENSG00000112715, ENSG00000136108, ENSG00000171791, ENSG00000109705, ENSG00000158156, ENSG0000…	282	1747	16650	1.04769	1	1	0.991488
Annotation Cluster 62	Enrichment Score: 0.5538838716708794
Category	Term	Count	%	PValue	Genes	List Total	Pop Hits	Pop Total	Fold Enrichment	Bonferroni	Benjamini	FDR
GOTERM_BP_FAT	GO:2001020~regulation of response to DNA damage stimulus	7	2.04678	0.0516731	ENSG00000166313, ENSG00000162607, ENSG00000111247, ENSG00000170485, ENSG00000183765, ENSG00000136997, ENSG00000124795	282	158	16650	2.61581	1	1	0.991488
GOTERM_BP_FAT	GO:0010332~response to gamma radiation	3	0.877193	0.212649	ENSG00000171791, ENSG00000183765, ENSG00000136997	282	51	16650	3.47309	1	1	0.991488
GOTERM_BP_FAT	GO:0071214~cellular response to abiotic stimulus	7	2.04678	0.299313	ENSG00000099864, ENSG00000120949, ENSG00000111247, ENSG00000100300, ENSG00000005339, ENSG00000183765, ENSG00000136997	282	268	16650	1.54216	1	1	0.991488
GOTERM_BP_FAT	GO:0010212~response to ionizing radiation	4	1.16959	0.4396	ENSG00000171791, ENSG00000111247, ENSG00000183765, ENSG00000136997	282	144	16650	1.64007	1	1	0.991488
GOTERM_BP_FAT	GO:0071478~cellular response to radiation	4	1.16959	0.461637	ENSG00000111247, ENSG00000005339, ENSG00000183765, ENSG00000136997	282	149	16650	1.58503	1	1	0.991488
GOTERM_BP_FAT	GO:0009314~response to radiation	7	2.04678	0.711679	ENSG00000171791, ENSG00000162607, ENSG00000166803, ENSG00000111247, ENSG00000005339, ENSG00000183765, ENSG00000136997	282	418	16650	0.988751	1	1	0.991488
Annotation Cluster 63	Enrichment Score: 0.5423252247510111
Category	Term	Count	%	PValue	Genes	List Total	Pop Hits	Pop Total	Fold Enrichment	Bonferroni	Benjamini	FDR
GOTERM_BP_FAT	GO:0006302~double-strand break repair	8	2.33918	0.0612699	ENSG00000134758, ENSG00000166313, ENSG00000116670, ENSG00000111247, ENSG00000076242, ENSG00000100918, ENSG00000183765, ENSG00000124795	282	206	16650	2.29291	1	1	0.991488
GOTERM_BP_FAT	GO:0000724~double-strand break repair via homologous recombination	3	0.877193	0.409946	ENSG00000134758, ENSG00000111247, ENSG00000100918	282	83	16650	2.13407	1	1	0.991488
GOTERM_BP_FAT	GO:0000725~recombinational repair	3	0.877193	0.415818	ENSG00000134758, ENSG00000111247, ENSG00000100918	282	84	16650	2.10866	1	1	0.991488
GOTERM_BP_FAT	GO:0006310~DNA recombination	5	1.46199	0.648368	ENSG00000134758, ENSG00000174371, ENSG00000111247, ENSG00000076242, ENSG00000100918	282	262	16650	1.12677	1	1	0.991488
Annotation Cluster 64	Enrichment Score: 0.5422598060682039
Category	Term	Count	%	PValue	Genes	List Total	Pop Hits	Pop Total	Fold Enrichment	Bonferroni	Benjamini	FDR
GOTERM_BP_FAT	GO:2000179~positive regulation of neural precursor cell proliferation	3	0.877193	0.169816	ENSG00000112715, ENSG00000089116, ENSG00000142700	282	44	16650	4.02563	1	1	0.991488
GOTERM_BP_FAT	GO:0061351~neural precursor cell proliferation	4	1.16959	0.371713	ENSG00000112715, ENSG00000089116, ENSG00000161800, ENSG00000142700	282	129	16650	1.83078	1	1	0.991488
GOTERM_BP_FAT	GO:2000177~regulation of neural precursor cell proliferation	3	0.877193	0.374141	ENSG00000112715, ENSG00000089116, ENSG00000142700	282	77	16650	2.30036	1	1	0.991488
Annotation Cluster 65	Enrichment Score: 0.5405676307903231
Category	Term	Count	%	PValue	Genes	List Total	Pop Hits	Pop Total	Fold Enrichment	Bonferroni	Benjamini	FDR
GOTERM_BP_FAT	GO:0043457~regulation of cellular respiration	3	0.877193	0.0569043	ENSG00000125648, ENSG00000136997, ENSG00000142611	282	23	16650	7.7012	1	1	0.991488
GOTERM_BP_FAT	GO:0043467~regulation of generation of precursor metabolites and energy	3	0.877193	0.439006	ENSG00000125648, ENSG00000136997, ENSG00000142611	282	88	16650	2.01281	1	1	0.991488
GOTERM_BP_FAT	GO:0006091~generation of precursor metabolites and energy	4	1.16959	0.956493	ENSG00000132326, ENSG00000125648, ENSG00000136997, ENSG00000142611	282	379	16650	0.62314	1	1	0.991488
Annotation Cluster 66	Enrichment Score: 0.5326653360091367
Category	Term	Count	%	PValue	Genes	List Total	Pop Hits	Pop Total	Fold Enrichment	Bonferroni	Benjamini	FDR
GOTERM_BP_FAT	GO:0002275~myeloid cell activation involved in immune response	5	1.46199	0.0319665	ENSG00000047621, ENSG00000103241, ENSG00000103490, ENSG00000064932, ENSG00000159842	282	71	16650	4.15793	1	0.979071	0.970514
GOTERM_BP_FAT	GO:0002366~leukocyte activation involved in immune response	8	2.33918	0.0685463	ENSG00000047621, ENSG00000174371, ENSG00000103241, ENSG00000103490, ENSG00000120899, ENSG00000076242, ENSG00000064932, ENSG00000159842	282	212	16650	2.22802	1	1	0.991488
GOTERM_BP_FAT	GO:0002263~cell activation involved in immune response	8	2.33918	0.0713533	ENSG00000047621, ENSG00000174371, ENSG00000103241, ENSG00000103490, ENSG00000120899, ENSG00000076242, ENSG00000064932, ENSG00000159842	282	214	16650	2.2072	1	1	0.991488
GOTERM_BP_FAT	GO:0002886~regulation of myeloid leukocyte mediated immunity	3	0.877193	0.151949	ENSG00000047621, ENSG00000103241, ENSG00000159842	282	41	16650	4.32019	1	1	0.991488
GOTERM_BP_FAT	GO:0043300~regulation of leukocyte degranulation	3	0.877193	0.157863	ENSG00000047621, ENSG00000103241, ENSG00000159842	282	42	16650	4.21733	1	1	0.991488
GOTERM_BP_FAT	GO:0002274~myeloid leukocyte activation	5	1.46199	0.236887	ENSG00000047621, ENSG00000103241, ENSG00000103490, ENSG00000064932, ENSG00000159842	282	147	16650	2.00825	1	1	0.991488
GOTERM_BP_FAT	GO:0002697~regulation of immune effector process	8	2.33918	0.305356	ENSG00000047621, ENSG00000103241, ENSG00000255690, ENSG00000103490, ENSG00000055332, ENSG00000167191, ENSG00000159842, ENSG00000107201	282	325	16650	1.45336	1	1	0.991488
GOTERM_BP_FAT	GO:0043299~leukocyte degranulation	3	0.877193	0.306466	ENSG00000047621, ENSG00000103241, ENSG00000159842	282	66	16650	2.68375	1	1	0.991488
GOTERM_BP_FAT	GO:0002444~myeloid leukocyte mediated immunity	3	0.877193	0.38618	ENSG00000047621, ENSG00000103241, ENSG00000159842	282	79	16650	2.24212	1	1	0.991488
GOTERM_BP_FAT	GO:0002443~leukocyte mediated immunity	7	2.04678	0.558744	ENSG00000185507, ENSG00000047621, ENSG00000174371, ENSG00000103241, ENSG00000196230, ENSG00000076242, ENSG00000159842	282	356	16650	1.16095	1	1	0.991488
GOTERM_BP_FAT	GO:0050727~regulation of inflammatory response	6	1.75439	0.614212	ENSG00000103241, ENSG00000103490, ENSG00000144891, ENSG00000167191, ENSG00000064932, ENSG00000159842	282	314	16650	1.1282	1	1	0.991488
GOTERM_BP_FAT	GO:0045321~leukocyte activation	12	3.50877	0.720737	ENSG00000047621, ENSG00000174371, ENSG00000103241, ENSG00000103490, ENSG00000171791, ENSG00000123999, ENSG00000120899, ENSG00000076242, ENSG00000069482, ENSG00000067082, ENSG00000064932, ENSG00000159842	282	747	16650	0.948475	1	1	0.991488
GOTERM_BP_FAT	GO:0002703~regulation of leukocyte mediated immunity	3	0.877193	0.742955	ENSG00000047621, ENSG00000103241, ENSG00000159842	282	156	16650	1.13543	1	1	0.991488
GOTERM_BP_FAT	GO:0050865~regulation of cell activation	8	2.33918	0.745326	ENSG00000047621, ENSG00000103241, ENSG00000103490, ENSG00000171791, ENSG00000123999, ENSG00000129194, ENSG00000069482, ENSG00000159842	282	501	16650	0.942795	1	1	0.991488
GOTERM_BP_FAT	GO:0002694~regulation of leukocyte activation	7	2.04678	0.805527	ENSG00000047621, ENSG00000103241, ENSG00000103490, ENSG00000171791, ENSG00000123999, ENSG00000069482, ENSG00000159842	282	468	16650	0.883115	1	1	0.991488
GOTERM_BP_FAT	GO:0001775~cell activation	13	3.80117	0.847362	ENSG00000047621, ENSG00000174371, ENSG00000103241, ENSG00000103490, ENSG00000171791, ENSG00000129194, ENSG00000076242, ENSG00000064932, ENSG00000159842, ENSG00000123999, ENSG00000120899, ENSG00000069482, ENSG00000067082	282	910	16650	0.843465	1	1	0.991488
Annotation Cluster 67	Enrichment Score: 0.5267253484793673
Category	Term	Count	%	PValue	Genes	List Total	Pop Hits	Pop Total	Fold Enrichment	Bonferroni	Benjamini	FDR
GOTERM_BP_FAT	GO:0070192~chromosome organization involved in meiotic cell cycle	4	1.16959	0.0838891	ENSG00000113810, ENSG00000076242, ENSG00000100918, ENSG00000141696	282	61	16650	3.87164	1	1	0.991488
GOTERM_BP_FAT	GO:0007129~synapsis	3	0.877193	0.157863	ENSG00000076242, ENSG00000100918, ENSG00000141696	282	42	16650	4.21733	1	1	0.991488
GOTERM_BP_FAT	GO:0045132~meiotic chromosome segregation	4	1.16959	0.173348	ENSG00000113810, ENSG00000076242, ENSG00000100918, ENSG00000141696	282	85	16650	2.77847	1	1	0.991488
GOTERM_BP_FAT	GO:0045143~homologous chromosome segregation	3	0.877193	0.24383	ENSG00000076242, ENSG00000100918, ENSG00000141696	282	56	16650	3.16299	1	1	0.991488
GOTERM_BP_FAT	GO:0051321~meiotic cell cycle	5	1.46199	0.546151	ENSG00000174371, ENSG00000113810, ENSG00000076242, ENSG00000100918, ENSG00000141696	282	230	16650	1.28353	1	1	0.991488
GOTERM_BP_FAT	GO:0007127~meiosis I	3	0.877193	0.546726	ENSG00000076242, ENSG00000100918, ENSG00000141696	282	108	16650	1.64007	1	1	0.991488
GOTERM_BP_FAT	GO:0007126~meiotic nuclear division	4	1.16959	0.588426	ENSG00000113810, ENSG00000076242, ENSG00000100918, ENSG00000141696	282	180	16650	1.31206	1	1	0.991488
GOTERM_BP_FAT	GO:1903046~meiotic cell cycle process	4	1.16959	0.621485	ENSG00000113810, ENSG00000076242, ENSG00000100918, ENSG00000141696	282	189	16650	1.24958	1	1	0.991488
Annotation Cluster 68	Enrichment Score: 0.5242054336860594
Category	Term	Count	%	PValue	Genes	List Total	Pop Hits	Pop Total	Fold Enrichment	Bonferroni	Benjamini	FDR
GOTERM_BP_FAT	GO:0002366~leukocyte activation involved in immune response	8	2.33918	0.0685463	ENSG00000047621, ENSG00000174371, ENSG00000103241, ENSG00000103490, ENSG00000120899, ENSG00000076242, ENSG00000064932, ENSG00000159842	282	212	16650	2.22802	1	1	0.991488
GOTERM_BP_FAT	GO:0002263~cell activation involved in immune response	8	2.33918	0.0713533	ENSG00000047621, ENSG00000174371, ENSG00000103241, ENSG00000103490, ENSG00000120899, ENSG00000076242, ENSG00000064932, ENSG00000159842	282	214	16650	2.2072	1	1	0.991488
GOTERM_BP_FAT	GO:0002312~B cell activation involved in immune response	3	0.877193	0.262636	ENSG00000174371, ENSG00000120899, ENSG00000076242	282	59	16650	3.00216	1	1	0.991488
GOTERM_BP_FAT	GO:0002285~lymphocyte activation involved in immune response	3	0.877193	0.719692	ENSG00000174371, ENSG00000120899, ENSG00000076242	282	149	16650	1.18878	1	1	0.991488
GOTERM_BP_FAT	GO:0002250~adaptive immune response	6	1.75439	0.840647	ENSG00000185507, ENSG00000174371, ENSG00000103490, ENSG00000204267, ENSG00000120899, ENSG00000076242	282	420	16650	0.843465	1	1	0.991488
GOTERM_BP_FAT	GO:0046649~lymphocyte activation	8	2.33918	0.92099	ENSG00000174371, ENSG00000103490, ENSG00000171791, ENSG00000123999, ENSG00000120899, ENSG00000076242, ENSG00000069482, ENSG00000067082	282	643	16650	0.734589	1	1	0.991488
Annotation Cluster 69	Enrichment Score: 0.5087977016420071
Category	Term	Count	%	PValue	Genes	List Total	Pop Hits	Pop Total	Fold Enrichment	Bonferroni	Benjamini	FDR
GOTERM_BP_FAT	GO:1901137~carbohydrate derivative biosynthetic process	17	4.97076	0.209799	ENSG00000174684, ENSG00000099864, ENSG00000081479, ENSG00000136997, ENSG00000152402, ENSG00000154027, ENSG00000100626, ENSG00000120697, ENSG00000162066, ENSG00000182240, ENSG00000169255, ENSG00000162512, ENSG00000073849, ENSG00000182870, ENSG00000103202, ENSG00000169418, ENSG00000128951	282	756	16650	1.32768	1	1	0.991488
GOTERM_BP_FAT	GO:0070085~glycosylation	8	2.33918	0.217346	ENSG00000120697, ENSG00000100626, ENSG00000148803, ENSG00000174684, ENSG00000169255, ENSG00000073849, ENSG00000182870, ENSG00000081479	282	289	16650	1.6344	1	1	0.991488
GOTERM_BP_FAT	GO:0006493~protein O-linked glycosylation	4	1.16959	0.256628	ENSG00000120697, ENSG00000174684, ENSG00000073849, ENSG00000182870	282	104	16650	2.27087	1	1	0.991488
GOTERM_BP_FAT	GO:0006486~protein glycosylation	7	2.04678	0.332299	ENSG00000120697, ENSG00000100626, ENSG00000174684, ENSG00000169255, ENSG00000073849, ENSG00000182870, ENSG00000081479	282	279	16650	1.48135	1	1	0.991488
GOTERM_BP_FAT	GO:0043413~macromolecule glycosylation	7	2.04678	0.332299	ENSG00000120697, ENSG00000100626, ENSG00000174684, ENSG00000169255, ENSG00000073849, ENSG00000182870, ENSG00000081479	282	279	16650	1.48135	1	1	0.991488
GOTERM_BP_FAT	GO:0005975~carbohydrate metabolic process	16	4.67836	0.335977	ENSG00000132326, ENSG00000174684, ENSG00000081479, ENSG00000005882, ENSG00000136997, ENSG00000142102, ENSG00000100626, ENSG00000120697, ENSG00000166147, ENSG00000148803, ENSG00000162066, ENSG00000169255, ENSG00000120899, ENSG00000073849, ENSG00000182870, ENSG00000146674	282	778	16650	1.21424	1	1	0.991488
GOTERM_BP_FAT	GO:0009100~glycoprotein metabolic process	9	2.63158	0.3614	ENSG00000120697, ENSG00000100626, ENSG00000174684, ENSG00000182240, ENSG00000169255, ENSG00000171791, ENSG00000073849, ENSG00000182870, ENSG00000081479	282	399	16650	1.33179	1	1	0.991488
GOTERM_BP_FAT	GO:0009101~glycoprotein biosynthetic process	8	2.33918	0.389082	ENSG00000120697, ENSG00000100626, ENSG00000174684, ENSG00000182240, ENSG00000169255, ENSG00000073849, ENSG00000182870, ENSG00000081479	282	354	16650	1.33429	1	1	0.991488
GOTERM_BP_FAT	GO:0044723~single-organism carbohydrate metabolic process	13	3.80117	0.431681	ENSG00000132326, ENSG00000174684, ENSG00000081479, ENSG00000005882, ENSG00000136997, ENSG00000100626, ENSG00000120697, ENSG00000166147, ENSG00000148803, ENSG00000169255, ENSG00000120899, ENSG00000073849, ENSG00000182870	282	656	16650	1.17005	1	1	0.991488
Annotation Cluster 70	Enrichment Score: 0.4946724768974235
Category	Term	Count	%	PValue	Genes	List Total	Pop Hits	Pop Total	Fold Enrichment	Bonferroni	Benjamini	FDR
GOTERM_BP_FAT	GO:0030218~erythrocyte differentiation	4	1.16959	0.220718	ENSG00000112715, ENSG00000123999, ENSG00000160710, ENSG00000162367	282	96	16650	2.46011	1	1	0.991488
GOTERM_BP_FAT	GO:0034101~erythrocyte homeostasis	4	1.16959	0.261176	ENSG00000112715, ENSG00000123999, ENSG00000160710, ENSG00000162367	282	105	16650	2.24924	1	1	0.991488
GOTERM_BP_FAT	GO:0002262~myeloid cell homeostasis	4	1.16959	0.34869	ENSG00000112715, ENSG00000123999, ENSG00000160710, ENSG00000162367	282	124	16650	1.9046	1	1	0.991488
GOTERM_BP_FAT	GO:0048872~homeostasis of number of cells	5	1.46199	0.522516	ENSG00000112715, ENSG00000171791, ENSG00000123999, ENSG00000160710, ENSG00000162367	282	224	16650	1.31791	1	1	0.991488
Annotation Cluster 71	Enrichment Score: 0.4856265958057229
Category	Term	Count	%	PValue	Genes	List Total	Pop Hits	Pop Total	Fold Enrichment	Bonferroni	Benjamini	FDR
GOTERM_BP_FAT	GO:0051048~negative regulation of secretion	6	1.75439	0.228477	ENSG00000103241, ENSG00000123999, ENSG00000197696, ENSG00000157168, ENSG00000158445, ENSG00000159842	282	193	16650	1.83552	1	1	0.991488
GOTERM_BP_FAT	GO:0051051~negative regulation of transport	11	3.21637	0.229869	ENSG00000103241, ENSG00000171791, ENSG00000123999, ENSG00000120899, ENSG00000112559, ENSG00000197696, ENSG00000162878, ENSG00000157168, ENSG00000158445, ENSG00000136997, ENSG00000159842	282	450	16650	1.44326	1	1	0.991488
GOTERM_BP_FAT	GO:1903531~negative regulation of secretion by cell	5	1.46199	0.326958	ENSG00000103241, ENSG00000123999, ENSG00000197696, ENSG00000158445, ENSG00000159842	282	171	16650	1.72639	1	1	0.991488
GOTERM_BP_FAT	GO:0002695~negative regulation of leukocyte activation	4	1.16959	0.43069	ENSG00000103241, ENSG00000123999, ENSG00000069482, ENSG00000159842	282	142	16650	1.66317	1	1	0.991488
GOTERM_BP_FAT	GO:0050866~negative regulation of cell activation	4	1.16959	0.504531	ENSG00000103241, ENSG00000123999, ENSG00000069482, ENSG00000159842	282	159	16650	1.48535	1	1	0.991488
Annotation Cluster 72	Enrichment Score: 0.47942033482806795
Category	Term	Count	%	PValue	Genes	List Total	Pop Hits	Pop Total	Fold Enrichment	Bonferroni	Benjamini	FDR
GOTERM_BP_FAT	GO:0032608~interferon-beta production	4	1.16959	0.0357495	ENSG00000185507, ENSG00000103490, ENSG00000137312, ENSG00000107201	282	43	16650	5.49233	1	1	0.991488
GOTERM_BP_FAT	GO:0032648~regulation of interferon-beta production	4	1.16959	0.0401174	ENSG00000185507, ENSG00000103490, ENSG00000137312, ENSG00000107201	282	45	16650	5.24823	1	1	0.991488
GOTERM_BP_FAT	GO:0032728~positive regulation of interferon-beta production	3	0.877193	0.0958947	ENSG00000185507, ENSG00000137312, ENSG00000107201	282	31	16650	5.7138	1	1	0.991488
GOTERM_BP_FAT	GO:0032606~type I interferon production	5	1.46199	0.110107	ENSG00000185507, ENSG00000103490, ENSG00000005339, ENSG00000137312, ENSG00000107201	282	108	16650	2.73345	1	1	0.991488
GOTERM_BP_FAT	GO:0032481~positive regulation of type I interferon production	4	1.16959	0.118265	ENSG00000185507, ENSG00000005339, ENSG00000137312, ENSG00000107201	282	71	16650	3.32634	1	1	0.991488
GOTERM_BP_FAT	GO:0032479~regulation of type I interferon production	5	1.46199	0.121366	ENSG00000185507, ENSG00000103490, ENSG00000005339, ENSG00000137312, ENSG00000107201	282	112	16650	2.63583	1	1	0.991488
GOTERM_BP_FAT	GO:0001817~regulation of cytokine production	14	4.09357	0.17845	ENSG00000185507, ENSG00000255690, ENSG00000213694, ENSG00000103490, ENSG00000120949, ENSG00000005339, ENSG00000167191, ENSG00000137312, ENSG00000185187, ENSG00000123999, ENSG00000055332, ENSG00000227507, ENSG00000100300, ENSG00000107201	282	577	16650	1.43257	1	1	0.991488
GOTERM_BP_FAT	GO:0001816~cytokine production	14	4.09357	0.269557	ENSG00000185507, ENSG00000255690, ENSG00000213694, ENSG00000103490, ENSG00000120949, ENSG00000005339, ENSG00000167191, ENSG00000137312, ENSG00000185187, ENSG00000123999, ENSG00000055332, ENSG00000227507, ENSG00000100300, ENSG00000107201	282	631	16650	1.30998	1	1	0.991488
GOTERM_BP_FAT	GO:0001819~positive regulation of cytokine production	9	2.63158	0.32767	ENSG00000185507, ENSG00000103490, ENSG00000055332, ENSG00000120949, ENSG00000227507, ENSG00000167191, ENSG00000005339, ENSG00000137312, ENSG00000107201	282	386	16650	1.37664	1	1	0.991488
GOTERM_BP_FAT	GO:0002218~activation of innate immune response	6	1.75439	0.414607	ENSG00000185507, ENSG00000255690, ENSG00000103490, ENSG00000005339, ENSG00000137312, ENSG00000107201	282	250	16650	1.41702	1	1	0.991488
GOTERM_BP_FAT	GO:0031347~regulation of defense response	13	3.80117	0.467285	ENSG00000185507, ENSG00000103241, ENSG00000255690, ENSG00000103490, ENSG00000005339, ENSG00000167191, ENSG00000064932, ENSG00000159842, ENSG00000137312, ENSG00000055332, ENSG00000144891, ENSG00000160710, ENSG00000107201	282	676	16650	1.13543	1	1	0.991488
GOTERM_BP_FAT	GO:0002221~pattern recognition receptor signaling pathway	4	1.16959	0.504531	ENSG00000185507, ENSG00000255690, ENSG00000137312, ENSG00000107201	282	159	16650	1.48535	1	1	0.991488
GOTERM_BP_FAT	GO:0031349~positive regulation of defense response	8	2.33918	0.520379	ENSG00000185507, ENSG00000255690, ENSG00000103490, ENSG00000144891, ENSG00000167191, ENSG00000005339, ENSG00000137312, ENSG00000107201	282	402	16650	1.17498	1	1	0.991488
GOTERM_BP_FAT	GO:0045089~positive regulation of innate immune response	6	1.75439	0.558331	ENSG00000185507, ENSG00000255690, ENSG00000103490, ENSG00000005339, ENSG00000137312, ENSG00000107201	282	292	16650	1.2132	1	1	0.991488
GOTERM_BP_FAT	GO:0045088~regulation of innate immune response	7	2.04678	0.569703	ENSG00000185507, ENSG00000255690, ENSG00000103490, ENSG00000005339, ENSG00000160710, ENSG00000137312, ENSG00000107201	282	360	16650	1.14805	1	1	0.991488
GOTERM_BP_FAT	GO:0002758~innate immune response-activating signal transduction	5	1.46199	0.589339	ENSG00000185507, ENSG00000255690, ENSG00000005339, ENSG00000137312, ENSG00000107201	282	243	16650	1.21487	1	1	0.991488
GOTERM_BP_FAT	GO:0002224~toll-like receptor signaling pathway	3	0.877193	0.599529	ENSG00000185507, ENSG00000255690, ENSG00000137312	282	119	16650	1.48847	1	1	0.991488
GOTERM_BP_FAT	GO:0002684~positive regulation of immune system process	15	4.38596	0.751189	ENSG00000047621, ENSG00000185507, ENSG00000103241, ENSG00000112715, ENSG00000255690, ENSG00000103490, ENSG00000171791, ENSG00000106538, ENSG00000005339, ENSG00000167191, ENSG00000137312, ENSG00000204267, ENSG00000120899, ENSG00000162367, ENSG00000107201	282	960	16650	0.92254	1	1	0.991488
GOTERM_BP_FAT	GO:0050776~regulation of immune response	13	3.80117	0.849376	ENSG00000047621, ENSG00000185507, ENSG00000103241, ENSG00000255690, ENSG00000103490, ENSG00000171791, ENSG00000005339, ENSG00000167191, ENSG00000159842, ENSG00000137312, ENSG00000204642, ENSG00000160710, ENSG00000107201	282	912	16650	0.841615	1	1	0.991488
GOTERM_BP_FAT	GO:0002253~activation of immune response	7	2.04678	0.906116	ENSG00000185507, ENSG00000255690, ENSG00000103490, ENSG00000171791, ENSG00000005339, ENSG00000137312, ENSG00000107201	282	550	16650	0.751451	1	1	0.991488
GOTERM_BP_FAT	GO:0002757~immune response-activating signal transduction	6	1.75439	0.926085	ENSG00000185507, ENSG00000255690, ENSG00000171791, ENSG00000005339, ENSG00000137312, ENSG00000107201	282	498	16650	0.711356	1	1	0.991488
GOTERM_BP_FAT	GO:0050778~positive regulation of immune response	8	2.33918	0.946215	ENSG00000185507, ENSG00000255690, ENSG00000103490, ENSG00000171791, ENSG00000167191, ENSG00000005339, ENSG00000137312, ENSG00000107201	282	684	16650	0.690556	1	1	0.991488
GOTERM_BP_FAT	GO:0002764~immune response-regulating signaling pathway	6	1.75439	0.947859	ENSG00000185507, ENSG00000255690, ENSG00000171791, ENSG00000005339, ENSG00000137312, ENSG00000107201	282	531	16650	0.667147	1	1	0.991488
Annotation Cluster 73	Enrichment Score: 0.4771226370111491
Category	Term	Count	%	PValue	Genes	List Total	Pop Hits	Pop Total	Fold Enrichment	Bonferroni	Benjamini	FDR
GOTERM_BP_FAT	GO:0022411~cellular component disassembly	13	3.80117	0.143917	ENSG00000213024, ENSG00000136108, ENSG00000181991, ENSG00000180340, ENSG00000197457, ENSG00000157168, ENSG00000038295, ENSG00000137312, ENSG00000174547, ENSG00000086504, ENSG00000166147, ENSG00000030066, ENSG00000100300	282	502	16650	1.52899	1	1	0.991488
GOTERM_BP_FAT	GO:0043624~cellular protein complex disassembly	6	1.75439	0.233907	ENSG00000136108, ENSG00000086504, ENSG00000181991, ENSG00000197457, ENSG00000157168, ENSG00000174547	282	195	16650	1.81669	1	1	0.991488
GOTERM_BP_FAT	GO:0043241~protein complex disassembly	7	2.04678	0.253619	ENSG00000136108, ENSG00000086504, ENSG00000181991, ENSG00000180340, ENSG00000197457, ENSG00000157168, ENSG00000174547	282	252	16650	1.64007	1	1	0.991488
GOTERM_BP_FAT	GO:0032984~macromolecular complex disassembly	7	2.04678	0.281947	ENSG00000136108, ENSG00000086504, ENSG00000181991, ENSG00000180340, ENSG00000197457, ENSG00000157168, ENSG00000174547	282	262	16650	1.57747	1	1	0.991488
GOTERM_BP_FAT	GO:0006414~translational elongation	4	1.16959	0.403671	ENSG00000086504, ENSG00000181991, ENSG00000125821, ENSG00000174547	282	136	16650	1.73655	1	1	0.991488
GOTERM_BP_FAT	GO:0070125~mitochondrial translational elongation	3	0.877193	0.421661	ENSG00000086504, ENSG00000181991, ENSG00000174547	282	85	16650	2.08385	1	1	0.991488
GOTERM_BP_FAT	GO:0070126~mitochondrial translational termination	3	0.877193	0.427474	ENSG00000086504, ENSG00000181991, ENSG00000174547	282	86	16650	2.05962	1	1	0.991488
GOTERM_BP_FAT	GO:0006415~translational termination	3	0.877193	0.48382	ENSG00000086504, ENSG00000181991, ENSG00000174547	282	96	16650	1.84508	1	1	0.991488
GOTERM_BP_FAT	GO:0032543~mitochondrial translation	3	0.877193	0.599529	ENSG00000086504, ENSG00000181991, ENSG00000174547	282	119	16650	1.48847	1	1	0.991488
Annotation Cluster 74	Enrichment Score: 0.47510399120139474
Category	Term	Count	%	PValue	Genes	List Total	Pop Hits	Pop Total	Fold Enrichment	Bonferroni	Benjamini	FDR
GOTERM_BP_FAT	GO:0034329~cell junction assembly	8	2.33918	0.044655	ENSG00000165474, ENSG00000112715, ENSG00000130545, ENSG00000171791, ENSG00000120899, ENSG00000179051, ENSG00000079308, ENSG00000137312	282	192	16650	2.46011	1	1	0.991488
GOTERM_BP_FAT	GO:0007044~cell-substrate junction assembly	5	1.46199	0.0596512	ENSG00000112715, ENSG00000171791, ENSG00000120899, ENSG00000179051, ENSG00000079308	282	87	16650	3.39325	1	1	0.991488
GOTERM_BP_FAT	GO:0034330~cell junction organization	9	2.63158	0.0607055	ENSG00000165474, ENSG00000112715, ENSG00000130545, ENSG00000169992, ENSG00000171791, ENSG00000120899, ENSG00000179051, ENSG00000079308, ENSG00000137312	282	249	16650	2.13407	1	1	0.991488
GOTERM_BP_FAT	GO:0048041~focal adhesion assembly	4	1.16959	0.0715537	ENSG00000112715, ENSG00000171791, ENSG00000120899, ENSG00000179051	282	57	16650	4.14334	1	1	0.991488
GOTERM_BP_FAT	GO:0007045~cell-substrate adherens junction assembly	4	1.16959	0.0715537	ENSG00000112715, ENSG00000171791, ENSG00000120899, ENSG00000179051	282	57	16650	4.14334	1	1	0.991488
GOTERM_BP_FAT	GO:0034333~adherens junction assembly	4	1.16959	0.103946	ENSG00000112715, ENSG00000171791, ENSG00000120899, ENSG00000179051	282	67	16650	3.52493	1	1	0.991488
GOTERM_BP_FAT	GO:0048646~anatomical structure formation involved in morphogenesis	26	7.60234	0.115814	ENSG00000107957, ENSG00000177508, ENSG00000003402, ENSG00000171700, ENSG00000112144, ENSG00000171812, ENSG00000183072, ENSG00000169126, ENSG00000120899, ENSG00000123388, ENSG00000103241, ENSG00000112715, ENSG00000128165, ENSG00000130700, ENSG00000180340, ENSG00000109705, ENSG00000135315, ENSG00000064932, ENSG00000137312, ENSG00000164066, ENSG00000005073, ENSG00000089116, ENSG00000164362, ENSG0000…	282	1151	16650	1.33372	1	1	0.991488
GOTERM_BP_FAT	GO:0048469~cell maturation	6	1.75439	0.117441	ENSG00000112715, ENSG00000171791, ENSG00000120899, ENSG00000100918, ENSG00000069482, ENSG00000162367	282	153	16650	2.31539	1	1	0.991488
GOTERM_BP_FAT	GO:0045216~cell-cell junction organization	7	2.04678	0.164019	ENSG00000165474, ENSG00000112715, ENSG00000130545, ENSG00000169992, ENSG00000171791, ENSG00000120899, ENSG00000179051	282	218	16650	1.89586	1	1	0.991488
GOTERM_BP_FAT	GO:0071456~cellular response to hypoxia	5	1.46199	0.184187	ENSG00000112715, ENSG00000214575, ENSG00000171791, ENSG00000164362, ENSG00000005339	282	132	16650	2.23646	1	1	0.991488
GOTERM_BP_FAT	GO:0001952~regulation of cell-matrix adhesion	4	1.16959	0.207528	ENSG00000112715, ENSG00000171791, ENSG00000120899, ENSG00000179051	282	93	16650	2.53946	1	1	0.991488
GOTERM_BP_FAT	GO:0021700~developmental maturation	7	2.04678	0.208252	ENSG00000112715, ENSG00000099864, ENSG00000171791, ENSG00000120899, ENSG00000100918, ENSG00000069482, ENSG00000162367	282	236	16650	1.75126	1	1	0.991488
GOTERM_BP_FAT	GO:0036294~cellular response to decreased oxygen levels	5	1.46199	0.208303	ENSG00000112715, ENSG00000214575, ENSG00000171791, ENSG00000164362, ENSG00000005339	282	139	16650	2.12383	1	1	0.991488
GOTERM_BP_FAT	GO:0071453~cellular response to oxygen levels	5	1.46199	0.244176	ENSG00000112715, ENSG00000214575, ENSG00000171791, ENSG00000164362, ENSG00000005339	282	149	16650	1.98129	1	1	0.991488
GOTERM_BP_FAT	GO:0034332~adherens junction organization	4	1.16959	0.325587	ENSG00000112715, ENSG00000171791, ENSG00000120899, ENSG00000179051	282	119	16650	1.98462	1	1	0.991488
GOTERM_BP_FAT	GO:0072358~cardiovascular system development	19	5.55556	0.329562	ENSG00000103241, ENSG00000112715, ENSG00000128165, ENSG00000130700, ENSG00000180340, ENSG00000081479, ENSG00000157168, ENSG00000185070, ENSG00000171812, ENSG00000183072, ENSG00000184271, ENSG00000166147, ENSG00000169126, ENSG00000120899, ENSG00000113083, ENSG00000164362, ENSG00000169418, ENSG00000162367, ENSG00000166823	282	945	16650	1.1871	1	1	0.991488
GOTERM_BP_FAT	GO:0072359~circulatory system development	19	5.55556	0.329562	ENSG00000103241, ENSG00000112715, ENSG00000128165, ENSG00000130700, ENSG00000180340, ENSG00000081479, ENSG00000157168, ENSG00000185070, ENSG00000171812, ENSG00000183072, ENSG00000184271, ENSG00000166147, ENSG00000169126, ENSG00000120899, ENSG00000113083, ENSG00000164362, ENSG00000169418, ENSG00000162367, ENSG00000166823	282	945	16650	1.1871	1	1	0.991488
GOTERM_BP_FAT	GO:0010810~regulation of cell-substrate adhesion	5	1.46199	0.356012	ENSG00000103241, ENSG00000112715, ENSG00000171791, ENSG00000120899, ENSG00000179051	282	179	16650	1.64923	1	1	0.991488
GOTERM_BP_FAT	GO:0045766~positive regulation of angiogenesis	4	1.16959	0.362518	ENSG00000112715, ENSG00000128165, ENSG00000120899, ENSG00000164362	282	127	16650	1.85961	1	1	0.991488
GOTERM_BP_FAT	GO:0001568~blood vessel development	12	3.50877	0.374387	ENSG00000171812, ENSG00000103241, ENSG00000112715, ENSG00000128165, ENSG00000183072, ENSG00000120899, ENSG00000113083, ENSG00000164362, ENSG00000081479, ENSG00000169418, ENSG00000162367, ENSG00000166823	282	576	16650	1.23005	1	1	0.991488
GOTERM_BP_FAT	GO:1904018~positive regulation of vasculature development	4	1.16959	0.435151	ENSG00000112715, ENSG00000128165, ENSG00000120899, ENSG00000164362	282	143	16650	1.65154	1	1	0.991488
GOTERM_BP_FAT	GO:0001944~vasculature development	12	3.50877	0.459159	ENSG00000171812, ENSG00000103241, ENSG00000112715, ENSG00000128165, ENSG00000183072, ENSG00000120899, ENSG00000113083, ENSG00000164362, ENSG00000081479, ENSG00000169418, ENSG00000162367, ENSG00000166823	282	610	16650	1.16149	1	1	0.991488
GOTERM_BP_FAT	GO:0045765~regulation of angiogenesis	5	1.46199	0.517758	ENSG00000112715, ENSG00000128165, ENSG00000120899, ENSG00000164362, ENSG00000169418	282	222	16650	1.32979	1	1	0.991488
GOTERM_BP_FAT	GO:0001666~response to hypoxia	6	1.75439	0.53122	ENSG00000112715, ENSG00000214575, ENSG00000171791, ENSG00000120899, ENSG00000164362, ENSG00000005339	282	286	16650	1.23865	1	1	0.991488
GOTERM_BP_FAT	GO:0060249~anatomical structure homeostasis	7	2.04678	0.547357	ENSG00000112715, ENSG00000102977, ENSG00000171791, ENSG00000120899, ENSG00000164362, ENSG00000181085, ENSG00000162882	282	352	16650	1.17414	1	1	0.991488
GOTERM_BP_FAT	GO:0036293~response to decreased oxygen levels	6	1.75439	0.558756	ENSG00000112715, ENSG00000214575, ENSG00000171791, ENSG00000120899, ENSG00000164362, ENSG00000005339	282	295	16650	1.20087	1	1	0.991488
GOTERM_BP_FAT	GO:0048514~blood vessel morphogenesis	9	2.63158	0.590317	ENSG00000171812, ENSG00000103241, ENSG00000112715, ENSG00000128165, ENSG00000183072, ENSG00000120899, ENSG00000164362, ENSG00000169418, ENSG00000162367	282	491	16650	1.08225	1	1	0.991488
GOTERM_BP_FAT	GO:0031589~cell-substrate adhesion	6	1.75439	0.591352	ENSG00000103241, ENSG00000112715, ENSG00000166452, ENSG00000171791, ENSG00000120899, ENSG00000179051	282	306	16650	1.1577	1	1	0.991488
GOTERM_BP_FAT	GO:1901342~regulation of vasculature development	5	1.46199	0.595818	ENSG00000112715, ENSG00000128165, ENSG00000120899, ENSG00000164362, ENSG00000169418	282	245	16650	1.20495	1	1	0.991488
GOTERM_BP_FAT	GO:0070482~response to oxygen levels	6	1.75439	0.614212	ENSG00000112715, ENSG00000214575, ENSG00000171791, ENSG00000120899, ENSG00000164362, ENSG00000005339	282	314	16650	1.1282	1	1	0.991488
GOTERM_BP_FAT	GO:0007160~cell-matrix adhesion	4	1.16959	0.632096	ENSG00000112715, ENSG00000171791, ENSG00000120899, ENSG00000179051	282	192	16650	1.23005	1	1	0.991488
GOTERM_BP_FAT	GO:0043523~regulation of neuron apoptotic process	4	1.16959	0.635587	ENSG00000171791, ENSG00000120899, ENSG00000164362, ENSG00000158445	282	193	16650	1.22368	1	1	0.991488
GOTERM_BP_FAT	GO:0051402~neuron apoptotic process	4	1.16959	0.672463	ENSG00000171791, ENSG00000120899, ENSG00000164362, ENSG00000158445	282	204	16650	1.1577	1	1	0.991488
GOTERM_BP_FAT	GO:0043524~negative regulation of neuron apoptotic process	3	0.877193	0.679591	ENSG00000171791, ENSG00000120899, ENSG00000164362	282	138	16650	1.28353	1	1	0.991488
GOTERM_BP_FAT	GO:0001525~angiogenesis	7	2.04678	0.700805	ENSG00000171812, ENSG00000112715, ENSG00000128165, ENSG00000120899, ENSG00000164362, ENSG00000169418, ENSG00000162367	282	413	16650	1.00072	1	1	0.991488
GOTERM_BP_FAT	GO:1901215~negative regulation of neuron death	3	0.877193	0.800507	ENSG00000171791, ENSG00000120899, ENSG00000164362	282	176	16650	1.00641	1	1	0.991488
GOTERM_BP_FAT	GO:1901214~regulation of neuron death	4	1.16959	0.811944	ENSG00000171791, ENSG00000120899, ENSG00000164362, ENSG00000158445	282	257	16650	0.91895	1	1	0.991488
GOTERM_BP_FAT	GO:0009628~response to abiotic stimulus	15	4.38596	0.832774	ENSG00000104321, ENSG00000112715, ENSG00000214575, ENSG00000099864, ENSG00000171791, ENSG00000162607, ENSG00000120949, ENSG00000111247, ENSG00000005339, ENSG00000136997, ENSG00000120899, ENSG00000164362, ENSG00000166803, ENSG00000100300, ENSG00000183765	282	1029	16650	0.860679	1	1	0.991488
GOTERM_BP_FAT	GO:0070997~neuron death	4	1.16959	0.849736	ENSG00000171791, ENSG00000120899, ENSG00000164362, ENSG00000158445	282	277	16650	0.8526	1	1	0.991488
GOTERM_BP_FAT	GO:0001894~tissue homeostasis	3	0.877193	0.850382	ENSG00000112715, ENSG00000171791, ENSG00000120899	282	198	16650	0.894584	1	1	0.991488
GOTERM_BP_FAT	GO:0030155~regulation of cell adhesion	9	2.63158	0.854318	ENSG00000103241, ENSG00000112715, ENSG00000116670, ENSG00000103490, ENSG00000171791, ENSG00000120899, ENSG00000179051, ENSG00000157168, ENSG00000137312	282	643	16650	0.826412	1	1	0.991488
GOTERM_BP_FAT	GO:0048871~multicellular organismal homeostasis	4	1.16959	0.905975	ENSG00000175707, ENSG00000112715, ENSG00000171791, ENSG00000120899	282	317	16650	0.745016	1	1	0.991488
Annotation Cluster 75	Enrichment Score: 0.474986577710044
Category	Term	Count	%	PValue	Genes	List Total	Pop Hits	Pop Total	Fold Enrichment	Bonferroni	Benjamini	FDR
GOTERM_BP_FAT	GO:0031668~cellular response to extracellular stimulus	6	1.75439	0.212533	ENSG00000147804, ENSG00000171791, ENSG00000055332, ENSG00000158445, ENSG00000005882, ENSG00000066735	282	188	16650	1.88434	1	1	0.991488
GOTERM_BP_FAT	GO:0042594~response to starvation	5	1.46199	0.258901	ENSG00000147804, ENSG00000163430, ENSG00000171791, ENSG00000055332, ENSG00000139874	282	153	16650	1.9295	1	1	0.991488
GOTERM_BP_FAT	GO:0071496~cellular response to external stimulus	7	2.04678	0.267808	ENSG00000147804, ENSG00000171791, ENSG00000055332, ENSG00000120949, ENSG00000158445, ENSG00000005882, ENSG00000066735	282	257	16650	1.60816	1	1	0.991488
GOTERM_BP_FAT	GO:0031669~cellular response to nutrient levels	5	1.46199	0.281298	ENSG00000147804, ENSG00000171791, ENSG00000055332, ENSG00000158445, ENSG00000005882	282	159	16650	1.85668	1	1	0.991488
GOTERM_BP_FAT	GO:0009991~response to extracellular stimulus	10	2.92398	0.322654	ENSG00000147804, ENSG00000163430, ENSG00000171791, ENSG00000055332, ENSG00000114115, ENSG00000100300, ENSG00000158445, ENSG00000005882, ENSG00000139874, ENSG00000066735	282	435	16650	1.3573	1	1	0.991488
GOTERM_BP_FAT	GO:0031667~response to nutrient levels	9	2.63158	0.368463	ENSG00000147804, ENSG00000163430, ENSG00000171791, ENSG00000055332, ENSG00000114115, ENSG00000100300, ENSG00000158445, ENSG00000005882, ENSG00000139874	282	404	16650	1.3153	1	1	0.991488
GOTERM_BP_FAT	GO:0007584~response to nutrient	4	1.16959	0.553786	ENSG00000114115, ENSG00000100300, ENSG00000005882, ENSG00000139874	282	171	16650	1.38111	1	1	0.991488
GOTERM_BP_FAT	GO:0009267~cellular response to starvation	3	0.877193	0.580876	ENSG00000147804, ENSG00000171791, ENSG00000055332	282	115	16650	1.54024	1	1	0.991488
Annotation Cluster 76	Enrichment Score: 0.46771482047999535
Category	Term	Count	%	PValue	Genes	List Total	Pop Hits	Pop Total	Fold Enrichment	Bonferroni	Benjamini	FDR
GOTERM_BP_FAT	GO:0000278~mitotic cell cycle	27	7.89474	0.013196	ENSG00000104147, ENSG00000154640, ENSG00000213024, ENSG00000197771, ENSG00000113810, ENSG00000100918, ENSG00000134690, ENSG00000136098, ENSG00000184661, ENSG00000161800, ENSG00000101057, ENSG00000180447, ENSG00000163808, ENSG00000136108, ENSG00000196230, ENSG00000171791, ENSG00000237649, ENSG00000117724, ENSG00000116017, ENSG00000116670, ENSG00000138160, ENSG00000030066, ENSG00000164362, ENSG0000…	282	968	16650	1.64685	1	0.659498	0.653734
GOTERM_BP_FAT	GO:0051726~regulation of cell cycle	24	7.01754	0.066543	ENSG00000197381, ENSG00000132326, ENSG00000154640, ENSG00000171791, ENSG00000129194, ENSG00000117724, ENSG00000116017, ENSG00000136997, ENSG00000112144, ENSG00000138028, ENSG00000166313, ENSG00000116670, ENSG00000138160, ENSG00000123999, ENSG00000164362, ENSG00000166803, ENSG00000179051, ENSG00000128789, ENSG00000161800, ENSG00000183765, ENSG00000101057, ENSG00000162367, ENSG00000180447, ENSG0000…	282	976	16650	1.45187	1	1	0.991488
GOTERM_BP_FAT	GO:0045930~negative regulation of mitotic cell cycle	8	2.33918	0.0784136	ENSG00000154640, ENSG00000116670, ENSG00000171791, ENSG00000117724, ENSG00000128789, ENSG00000116017, ENSG00000183765, ENSG00000180447	282	219	16650	2.15681	1	1	0.991488
GOTERM_BP_FAT	GO:1901991~negative regulation of mitotic cell cycle phase transition	6	1.75439	0.119816	ENSG00000116670, ENSG00000171791, ENSG00000117724, ENSG00000128789, ENSG00000116017, ENSG00000183765	282	154	16650	2.30036	1	1	0.991488
GOTERM_BP_FAT	GO:0007346~regulation of mitotic cell cycle	13	3.80117	0.128455	ENSG00000154640, ENSG00000171791, ENSG00000117724, ENSG00000116017, ENSG00000136997, ENSG00000116670, ENSG00000138160, ENSG00000164362, ENSG00000179051, ENSG00000128789, ENSG00000183765, ENSG00000162367, ENSG00000180447	282	491	16650	1.56324	1	1	0.991488
GOTERM_BP_FAT	GO:1901988~negative regulation of cell cycle phase transition	6	1.75439	0.150052	ENSG00000116670, ENSG00000171791, ENSG00000117724, ENSG00000128789, ENSG00000116017, ENSG00000183765	282	166	16650	2.13407	1	1	0.991488
GOTERM_BP_FAT	GO:0045786~negative regulation of cell cycle	12	3.50877	0.171195	ENSG00000166313, ENSG00000154640, ENSG00000116670, ENSG00000171791, ENSG00000123999, ENSG00000117724, ENSG00000128789, ENSG00000116017, ENSG00000183765, ENSG00000136997, ENSG00000180447, ENSG00000138028	282	470	16650	1.50747	1	1	0.991488
GOTERM_BP_FAT	GO:0007569~cell aging	4	1.16959	0.198838	ENSG00000213024, ENSG00000171791, ENSG00000164362, ENSG00000183765	282	91	16650	2.59528	1	1	0.991488
GOTERM_BP_FAT	GO:1901990~regulation of mitotic cell cycle phase transition	8	2.33918	0.275631	ENSG00000116670, ENSG00000171791, ENSG00000164362, ENSG00000179051, ENSG00000117724, ENSG00000128789, ENSG00000116017, ENSG00000183765	282	312	16650	1.51391	1	1	0.991488
GOTERM_BP_FAT	GO:0007093~mitotic cell cycle checkpoint	5	1.46199	0.281298	ENSG00000116670, ENSG00000117724, ENSG00000128789, ENSG00000116017, ENSG00000183765	282	159	16650	1.85668	1	1	0.991488
GOTERM_BP_FAT	GO:1901987~regulation of cell cycle phase transition	8	2.33918	0.339941	ENSG00000116670, ENSG00000171791, ENSG00000164362, ENSG00000179051, ENSG00000117724, ENSG00000128789, ENSG00000116017, ENSG00000183765	282	336	16650	1.40578	1	1	0.991488
GOTERM_BP_FAT	GO:0010948~negative regulation of cell cycle process	6	1.75439	0.385742	ENSG00000116670, ENSG00000171791, ENSG00000117724, ENSG00000128789, ENSG00000116017, ENSG00000183765	282	240	16650	1.47606	1	1	0.991488
GOTERM_BP_FAT	GO:0090068~positive regulation of cell cycle process	6	1.75439	0.417885	ENSG00000164362, ENSG00000179051, ENSG00000129194, ENSG00000161800, ENSG00000116017, ENSG00000183765	282	251	16650	1.41138	1	1	0.991488
GOTERM_BP_FAT	GO:2000045~regulation of G1/S transition of mitotic cell cycle	4	1.16959	0.426215	ENSG00000171791, ENSG00000164362, ENSG00000116017, ENSG00000183765	282	141	16650	1.67497	1	1	0.991488
GOTERM_BP_FAT	GO:0033138~positive regulation of peptidyl-serine phosphorylation	3	0.877193	0.450411	ENSG00000112715, ENSG00000116670, ENSG00000171791	282	90	16650	1.96809	1	1	0.991488
GOTERM_BP_FAT	GO:1902806~regulation of cell cycle G1/S phase transition	4	1.16959	0.478995	ENSG00000171791, ENSG00000164362, ENSG00000116017, ENSG00000183765	282	153	16650	1.5436	1	1	0.991488
GOTERM_BP_FAT	GO:2000134~negative regulation of G1/S transition of mitotic cell cycle	3	0.877193	0.48382	ENSG00000171791, ENSG00000116017, ENSG00000183765	282	96	16650	1.84508	1	1	0.991488
GOTERM_BP_FAT	GO:1902807~negative regulation of cell cycle G1/S phase transition	3	0.877193	0.505385	ENSG00000171791, ENSG00000116017, ENSG00000183765	282	100	16650	1.77128	1	1	0.991488
GOTERM_BP_FAT	GO:0000075~cell cycle checkpoint	5	1.46199	0.542887	ENSG00000116670, ENSG00000117724, ENSG00000128789, ENSG00000116017, ENSG00000183765	282	229	16650	1.28914	1	1	0.991488
GOTERM_BP_FAT	GO:0010564~regulation of cell cycle process	11	3.21637	0.550737	ENSG00000116670, ENSG00000138160, ENSG00000171791, ENSG00000164362, ENSG00000179051, ENSG00000129194, ENSG00000117724, ENSG00000128789, ENSG00000161800, ENSG00000116017, ENSG00000183765	282	595	16650	1.09154	1	1	0.991488
GOTERM_BP_FAT	GO:0042770~signal transduction in response to DNA damage	3	0.877193	0.599529	ENSG00000116670, ENSG00000116017, ENSG00000183765	282	119	16650	1.48847	1	1	0.991488
GOTERM_BP_FAT	GO:0033135~regulation of peptidyl-serine phosphorylation	3	0.877193	0.604093	ENSG00000112715, ENSG00000116670, ENSG00000171791	282	120	16650	1.47606	1	1	0.991488
GOTERM_BP_FAT	GO:0044772~mitotic cell cycle phase transition	9	2.63158	0.641736	ENSG00000116670, ENSG00000196230, ENSG00000171791, ENSG00000164362, ENSG00000179051, ENSG00000117724, ENSG00000128789, ENSG00000116017, ENSG00000183765	282	514	16650	1.03382	1	1	0.991488
GOTERM_BP_FAT	GO:0044839~cell cycle G2/M phase transition	4	1.16959	0.649321	ENSG00000196230, ENSG00000179051, ENSG00000117724, ENSG00000183765	282	197	16650	1.19883	1	1	0.991488
GOTERM_BP_FAT	GO:0007568~aging	5	1.46199	0.698879	ENSG00000213024, ENSG00000171791, ENSG00000164362, ENSG00000100300, ENSG00000183765	282	280	16650	1.05433	1	1	0.991488
GOTERM_BP_FAT	GO:0044770~cell cycle phase transition	9	2.63158	0.708772	ENSG00000116670, ENSG00000196230, ENSG00000171791, ENSG00000164362, ENSG00000179051, ENSG00000117724, ENSG00000128789, ENSG00000116017, ENSG00000183765	282	547	16650	0.97145	1	1	0.991488
GOTERM_BP_FAT	GO:0000082~G1/S transition of mitotic cell cycle	4	1.16959	0.73235	ENSG00000171791, ENSG00000164362, ENSG00000116017, ENSG00000183765	282	224	16650	1.05433	1	1	0.991488
GOTERM_BP_FAT	GO:0031647~regulation of protein stability	4	1.16959	0.743238	ENSG00000103490, ENSG00000171791, ENSG00000164362, ENSG00000183765	282	228	16650	1.03583	1	1	0.991488
GOTERM_BP_FAT	GO:0044843~cell cycle G1/S phase transition	4	1.16959	0.783304	ENSG00000171791, ENSG00000164362, ENSG00000116017, ENSG00000183765	282	244	16650	0.967911	1	1	0.991488
GOTERM_BP_FAT	GO:0018105~peptidyl-serine phosphorylation	4	1.16959	0.787932	ENSG00000112715, ENSG00000116670, ENSG00000171791, ENSG00000183765	282	246	16650	0.960042	1	1	0.991488
GOTERM_BP_FAT	GO:0018209~peptidyl-serine modification	4	1.16959	0.816055	ENSG00000112715, ENSG00000116670, ENSG00000171791, ENSG00000183765	282	259	16650	0.911854	1	1	0.991488
Annotation Cluster 77	Enrichment Score: 0.46372090304971736
Category	Term	Count	%	PValue	Genes	List Total	Pop Hits	Pop Total	Fold Enrichment	Bonferroni	Benjamini	FDR
GOTERM_BP_FAT	GO:0010038~response to metal ion	8	2.33918	0.267309	ENSG00000166313, ENSG00000125648, ENSG00000132749, ENSG00000171791, ENSG00000120899, ENSG00000164362, ENSG00000100300, ENSG00000162882	282	308	16650	1.53357	1	1	0.991488
GOTERM_BP_FAT	GO:1990267~response to transition metal nanoparticle	4	1.16959	0.385457	ENSG00000166313, ENSG00000171791, ENSG00000100300, ENSG00000162882	282	132	16650	1.78917	1	1	0.991488
GOTERM_BP_FAT	GO:0010035~response to inorganic substance	10	2.92398	0.394319	ENSG00000104321, ENSG00000166313, ENSG00000125648, ENSG00000132749, ENSG00000171791, ENSG00000120899, ENSG00000164362, ENSG00000100300, ENSG00000162882, ENSG00000136997	282	469	16650	1.2589	1	1	0.991488
Annotation Cluster 78	Enrichment Score: 0.44622082029073945
Category	Term	Count	%	PValue	Genes	List Total	Pop Hits	Pop Total	Fold Enrichment	Bonferroni	Benjamini	FDR
GOTERM_BP_FAT	GO:0098773~skin epidermis development	4	1.16959	0.156916	ENSG00000164066, ENSG00000175707, ENSG00000171791, ENSG00000069482	282	81	16650	2.91568	1	1	0.991488
GOTERM_BP_FAT	GO:0043588~skin development	7	2.04678	0.208252	ENSG00000164066, ENSG00000244617, ENSG00000175707, ENSG00000171791, ENSG00000110723, ENSG00000227507, ENSG00000069482	282	236	16650	1.75126	1	1	0.991488
GOTERM_BP_FAT	GO:0042303~molting cycle	4	1.16959	0.225152	ENSG00000164066, ENSG00000171791, ENSG00000164362, ENSG00000069482	282	97	16650	2.43474	1	1	0.991488
GOTERM_BP_FAT	GO:0042633~hair cycle	4	1.16959	0.225152	ENSG00000164066, ENSG00000171791, ENSG00000164362, ENSG00000069482	282	97	16650	2.43474	1	1	0.991488
GOTERM_BP_FAT	GO:0022404~molting cycle process	3	0.877193	0.38618	ENSG00000164066, ENSG00000171791, ENSG00000069482	282	79	16650	2.24212	1	1	0.991488
GOTERM_BP_FAT	GO:0022405~hair cycle process	3	0.877193	0.38618	ENSG00000164066, ENSG00000171791, ENSG00000069482	282	79	16650	2.24212	1	1	0.991488
GOTERM_BP_FAT	GO:0001942~hair follicle development	3	0.877193	0.38618	ENSG00000164066, ENSG00000171791, ENSG00000069482	282	79	16650	2.24212	1	1	0.991488
GOTERM_BP_FAT	GO:0030216~keratinocyte differentiation	3	0.877193	0.599529	ENSG00000164066, ENSG00000175707, ENSG00000110723	282	119	16650	1.48847	1	1	0.991488
GOTERM_BP_FAT	GO:0008544~epidermis development	5	1.46199	0.748672	ENSG00000164066, ENSG00000175707, ENSG00000171791, ENSG00000110723, ENSG00000069482	282	300	16650	0.984043	1	1	0.991488
GOTERM_BP_FAT	GO:0009913~epidermal cell differentiation	3	0.877193	0.805586	ENSG00000164066, ENSG00000175707, ENSG00000110723	282	178	16650	0.995099	1	1	0.991488
Annotation Cluster 79	Enrichment Score: 0.43761755387923135
Category	Term	Count	%	PValue	Genes	List Total	Pop Hits	Pop Total	Fold Enrichment	Bonferroni	Benjamini	FDR
GOTERM_BP_FAT	GO:2001237~negative regulation of extrinsic apoptotic signaling pathway	5	1.46199	0.101988	ENSG00000171791, ENSG00000164362, ENSG00000157168, ENSG00000174516, ENSG00000003402	282	105	16650	2.81155	1	1	0.991488
GOTERM_BP_FAT	GO:1901099~negative regulation of signal transduction in absence of ligand	3	0.877193	0.128782	ENSG00000171791, ENSG00000164362, ENSG00000157168	282	37	16650	4.78723	1	1	0.991488
GOTERM_BP_FAT	GO:2001240~negative regulation of extrinsic apoptotic signaling pathway in absence of ligand	3	0.877193	0.128782	ENSG00000171791, ENSG00000164362, ENSG00000157168	282	37	16650	4.78723	1	1	0.991488
GOTERM_BP_FAT	GO:2001236~regulation of extrinsic apoptotic signaling pathway	6	1.75439	0.137062	ENSG00000103490, ENSG00000171791, ENSG00000164362, ENSG00000157168, ENSG00000174516, ENSG00000003402	282	161	16650	2.20034	1	1	0.991488
GOTERM_BP_FAT	GO:2001239~regulation of extrinsic apoptotic signaling pathway in absence of ligand	3	0.877193	0.212649	ENSG00000171791, ENSG00000164362, ENSG00000157168	282	51	16650	3.47309	1	1	0.991488
GOTERM_BP_FAT	GO:0008630~intrinsic apoptotic signaling pathway in response to DNA damage	4	1.16959	0.256628	ENSG00000103490, ENSG00000171791, ENSG00000076242, ENSG00000183765	282	104	16650	2.27087	1	1	0.991488
GOTERM_BP_FAT	GO:0097191~extrinsic apoptotic signaling pathway	6	1.75439	0.331334	ENSG00000103490, ENSG00000171791, ENSG00000164362, ENSG00000157168, ENSG00000174516, ENSG00000003402	282	225	16650	1.57447	1	1	0.991488
GOTERM_BP_FAT	GO:0038034~signal transduction in absence of ligand	3	0.877193	0.362007	ENSG00000171791, ENSG00000164362, ENSG00000157168	282	75	16650	2.3617	1	1	0.991488
GOTERM_BP_FAT	GO:0097192~extrinsic apoptotic signaling pathway in absence of ligand	3	0.877193	0.362007	ENSG00000171791, ENSG00000164362, ENSG00000157168	282	75	16650	2.3617	1	1	0.991488
GOTERM_BP_FAT	GO:2001234~negative regulation of apoptotic signaling pathway	5	1.46199	0.476359	ENSG00000171791, ENSG00000164362, ENSG00000157168, ENSG00000174516, ENSG00000003402	282	210	16650	1.40578	1	1	0.991488
GOTERM_BP_FAT	GO:0097190~apoptotic signaling pathway	11	3.21637	0.503365	ENSG00000103490, ENSG00000171791, ENSG00000164362, ENSG00000215788, ENSG00000120949, ENSG00000076242, ENSG00000157168, ENSG00000174516, ENSG00000005882, ENSG00000183765, ENSG00000003402	282	583	16650	1.11401	1	1	0.991488
GOTERM_BP_FAT	GO:0043393~regulation of protein binding	4	1.16959	0.580835	ENSG00000171791, ENSG00000164362, ENSG00000157168, ENSG00000137312	282	178	16650	1.3268	1	1	0.991488
GOTERM_BP_FAT	GO:0097193~intrinsic apoptotic signaling pathway	5	1.46199	0.696214	ENSG00000103490, ENSG00000171791, ENSG00000076242, ENSG00000005882, ENSG00000183765	282	279	16650	1.05811	1	1	0.991488
GOTERM_BP_FAT	GO:1903829~positive regulation of cellular protein localization	6	1.75439	0.736809	ENSG00000112715, ENSG00000171791, ENSG00000164362, ENSG00000157168, ENSG00000158445, ENSG00000107201	282	363	16650	0.97591	1	1	0.991488
GOTERM_BP_FAT	GO:0031647~regulation of protein stability	4	1.16959	0.743238	ENSG00000103490, ENSG00000171791, ENSG00000164362, ENSG00000183765	282	228	16650	1.03583	1	1	0.991488
GOTERM_BP_FAT	GO:0010821~regulation of mitochondrion organization	4	1.16959	0.745905	ENSG00000103490, ENSG00000171791, ENSG00000100300, ENSG00000157168	282	229	16650	1.03131	1	1	0.991488
GOTERM_BP_FAT	GO:2001233~regulation of apoptotic signaling pathway	6	1.75439	0.772038	ENSG00000103490, ENSG00000171791, ENSG00000164362, ENSG00000157168, ENSG00000174516, ENSG00000003402	282	380	16650	0.932251	1	1	0.991488
GOTERM_BP_FAT	GO:0010822~positive regulation of mitochondrion organization	3	0.877193	0.789995	ENSG00000103490, ENSG00000171791, ENSG00000157168	282	172	16650	1.02981	1	1	0.991488
Annotation Cluster 80	Enrichment Score: 0.4317443085774578
Category	Term	Count	%	PValue	Genes	List Total	Pop Hits	Pop Total	Fold Enrichment	Bonferroni	Benjamini	FDR
GOTERM_BP_FAT	GO:0010827~regulation of glucose transport	5	1.46199	0.0967351	ENSG00000213024, ENSG00000030066, ENSG00000164362, ENSG00000106538, ENSG00000136997	282	103	16650	2.86614	1	1	0.991488
GOTERM_BP_FAT	GO:0046324~regulation of glucose import	3	0.877193	0.287714	ENSG00000164362, ENSG00000106538, ENSG00000136997	282	63	16650	2.81155	1	1	0.991488
GOTERM_BP_FAT	GO:0046323~glucose import	3	0.877193	0.318917	ENSG00000164362, ENSG00000106538, ENSG00000136997	282	68	16650	2.60482	1	1	0.991488
GOTERM_BP_FAT	GO:0008643~carbohydrate transport	4	1.16959	0.504531	ENSG00000164362, ENSG00000106538, ENSG00000136997, ENSG00000161798	282	159	16650	1.48535	1	1	0.991488
GOTERM_BP_FAT	GO:0015758~glucose transport	3	0.877193	0.590281	ENSG00000164362, ENSG00000106538, ENSG00000136997	282	117	16650	1.51391	1	1	0.991488
GOTERM_BP_FAT	GO:0008645~hexose transport	3	0.877193	0.599529	ENSG00000164362, ENSG00000106538, ENSG00000136997	282	119	16650	1.48847	1	1	0.991488
GOTERM_BP_FAT	GO:0015749~monosaccharide transport	3	0.877193	0.599529	ENSG00000164362, ENSG00000106538, ENSG00000136997	282	119	16650	1.48847	1	1	0.991488
Annotation Cluster 81	Enrichment Score: 0.42615484707034595
Category	Term	Count	%	PValue	Genes	List Total	Pop Hits	Pop Total	Fold Enrichment	Bonferroni	Benjamini	FDR
GOTERM_BP_FAT	GO:0010648~negative regulation of cell communication	29	8.47953	0.0435728	ENSG00000158747, ENSG00000213024, ENSG00000099864, ENSG00000103490, ENSG00000197696, ENSG00000197457, ENSG00000158445, ENSG00000174516, ENSG00000136997, ENSG00000003402, ENSG00000171700, ENSG00000185070, ENSG00000183072, ENSG00000187553, ENSG00000120899, ENSG00000160710, ENSG00000171791, ENSG00000112559, ENSG00000157168, ENSG00000066735, ENSG00000166147, ENSG00000116670, ENSG00000185187, ENSG0000…	282	1182	16650	1.44859	1	1	0.991488
GOTERM_BP_FAT	GO:0023057~negative regulation of signaling	29	8.47953	0.0455373	ENSG00000158747, ENSG00000213024, ENSG00000099864, ENSG00000103490, ENSG00000197696, ENSG00000197457, ENSG00000158445, ENSG00000174516, ENSG00000136997, ENSG00000003402, ENSG00000171700, ENSG00000185070, ENSG00000183072, ENSG00000187553, ENSG00000120899, ENSG00000160710, ENSG00000171791, ENSG00000112559, ENSG00000157168, ENSG00000066735, ENSG00000166147, ENSG00000116670, ENSG00000185187, ENSG0000…	282	1186	16650	1.4437	1	1	0.991488
GOTERM_BP_FAT	GO:0046578~regulation of Ras protein signal transduction	8	2.33918	0.0572212	ENSG00000213024, ENSG00000137135, ENSG00000197457, ENSG00000157168, ENSG00000240771, ENSG00000159842, ENSG00000137312, ENSG00000185989	282	203	16650	2.3268	1	1	0.991488
GOTERM_BP_FAT	GO:0009968~negative regulation of signal transduction	25	7.30994	0.108327	ENSG00000158747, ENSG00000213024, ENSG00000099864, ENSG00000103490, ENSG00000197457, ENSG00000174516, ENSG00000136997, ENSG00000003402, ENSG00000171700, ENSG00000185070, ENSG00000183072, ENSG00000187553, ENSG00000160710, ENSG00000171791, ENSG00000112559, ENSG00000157168, ENSG00000066735, ENSG00000166147, ENSG00000116670, ENSG00000185187, ENSG00000164362, ENSG00000146674, ENSG00000142611, ENSG0000…	282	1089	16650	1.35543	1	1	0.991488
GOTERM_BP_FAT	GO:0010562~positive regulation of phosphorus metabolic process	24	7.01754	0.119405	ENSG00000112715, ENSG00000103490, ENSG00000180340, ENSG00000171791, ENSG00000215788, ENSG00000112559, ENSG00000106538, ENSG00000157168, ENSG00000167191, ENSG00000136997, ENSG00000152402, ENSG00000137312, ENSG00000166444, ENSG00000166147, ENSG00000116670, ENSG00000184661, ENSG00000123999, ENSG00000120899, ENSG00000204435, ENSG00000055332, ENSG00000149599, ENSG00000146674, ENSG00000183765, ENSG0000…	282	1049	16650	1.35083	1	1	0.991488
GOTERM_BP_FAT	GO:0045937~positive regulation of phosphate metabolic process	24	7.01754	0.119405	ENSG00000112715, ENSG00000103490, ENSG00000180340, ENSG00000171791, ENSG00000215788, ENSG00000112559, ENSG00000106538, ENSG00000157168, ENSG00000167191, ENSG00000136997, ENSG00000152402, ENSG00000137312, ENSG00000166444, ENSG00000166147, ENSG00000116670, ENSG00000184661, ENSG00000123999, ENSG00000120899, ENSG00000204435, ENSG00000055332, ENSG00000149599, ENSG00000146674, ENSG00000183765, ENSG0000…	282	1049	16650	1.35083	1	1	0.991488
GOTERM_BP_FAT	GO:0051056~regulation of small GTPase mediated signal transduction	9	2.63158	0.134353	ENSG00000213024, ENSG00000137135, ENSG00000197457, ENSG00000157168, ENSG00000161800, ENSG00000240771, ENSG00000159842, ENSG00000137312, ENSG00000185989	282	299	16650	1.7772	1	1	0.991488
GOTERM_BP_FAT	GO:0048585~negative regulation of response to stimulus	29	8.47953	0.167036	ENSG00000158747, ENSG00000213024, ENSG00000099864, ENSG00000103490, ENSG00000197457, ENSG00000174516, ENSG00000136997, ENSG00000003402, ENSG00000171700, ENSG00000185070, ENSG00000183072, ENSG00000187553, ENSG00000055332, ENSG00000160710, ENSG00000103241, ENSG00000171791, ENSG00000112559, ENSG00000157168, ENSG00000159842, ENSG00000066735, ENSG00000166147, ENSG00000116670, ENSG00000185187, ENSG0000…	282	1369	16650	1.25072	1	1	0.991488
GOTERM_BP_FAT	GO:0007265~Ras protein signal transduction	9	2.63158	0.172957	ENSG00000213024, ENSG00000144891, ENSG00000137135, ENSG00000197457, ENSG00000157168, ENSG00000240771, ENSG00000159842, ENSG00000137312, ENSG00000185989	282	320	16650	1.66057	1	1	0.991488
GOTERM_BP_FAT	GO:0042327~positive regulation of phosphorylation	20	5.84795	0.228366	ENSG00000112715, ENSG00000103490, ENSG00000171791, ENSG00000215788, ENSG00000112559, ENSG00000106538, ENSG00000157168, ENSG00000167191, ENSG00000136997, ENSG00000137312, ENSG00000166444, ENSG00000166147, ENSG00000116670, ENSG00000123999, ENSG00000120899, ENSG00000204435, ENSG00000055332, ENSG00000149599, ENSG00000146674, ENSG00000183765	282	932	16650	1.26701	1	1	0.991488
GOTERM_BP_FAT	GO:0019220~regulation of phosphate metabolic process	32	9.35673	0.244502	ENSG00000213024, ENSG00000099864, ENSG00000103490, ENSG00000215788, ENSG00000136997, ENSG00000152402, ENSG00000185070, ENSG00000125648, ENSG00000184661, ENSG00000120899, ENSG00000204435, ENSG00000055332, ENSG00000149599, ENSG00000100300, ENSG00000160710, ENSG00000197381, ENSG00000112715, ENSG00000171791, ENSG00000180340, ENSG00000112559, ENSG00000106538, ENSG00000157168, ENSG00000167191, ENSG0000…	282	1610	16650	1.17352	1	1	0.991488
GOTERM_BP_FAT	GO:0051174~regulation of phosphorus metabolic process	32	9.35673	0.245604	ENSG00000213024, ENSG00000099864, ENSG00000103490, ENSG00000215788, ENSG00000136997, ENSG00000152402, ENSG00000185070, ENSG00000125648, ENSG00000184661, ENSG00000120899, ENSG00000204435, ENSG00000055332, ENSG00000149599, ENSG00000100300, ENSG00000160710, ENSG00000197381, ENSG00000112715, ENSG00000171791, ENSG00000180340, ENSG00000112559, ENSG00000106538, ENSG00000157168, ENSG00000167191, ENSG0000…	282	1611	16650	1.17279	1	1	0.991488
GOTERM_BP_FAT	GO:0001934~positive regulation of protein phosphorylation	19	5.55556	0.249673	ENSG00000112715, ENSG00000103490, ENSG00000171791, ENSG00000215788, ENSG00000112559, ENSG00000106538, ENSG00000157168, ENSG00000167191, ENSG00000137312, ENSG00000166444, ENSG00000166147, ENSG00000116670, ENSG00000123999, ENSG00000120899, ENSG00000204435, ENSG00000055332, ENSG00000149599, ENSG00000146674, ENSG00000183765	282	890	16650	1.26046	1	1	0.991488
GOTERM_BP_FAT	GO:0023051~regulation of signaling	57	16.6667	0.280054	ENSG00000185507, ENSG00000174371, ENSG00000213024, ENSG00000103490, ENSG00000099864, ENSG00000197696, ENSG00000133067, ENSG00000197457, ENSG00000158445, ENSG00000003402, ENSG00000171700, ENSG00000185070, ENSG00000204435, ENSG00000055332, ENSG00000180447, ENSG00000112715, ENSG00000171791, ENSG00000112559, ENSG00000005339, ENSG00000159842, ENSG00000240771, ENSG00000137312, ENSG00000164066, ENSG0000…	282	3070	16650	1.09623	1	1	0.991488
GOTERM_BP_FAT	GO:0009966~regulation of signal transduction	50	14.6199	0.339249	ENSG00000185507, ENSG00000174371, ENSG00000213024, ENSG00000103490, ENSG00000099864, ENSG00000133067, ENSG00000197457, ENSG00000003402, ENSG00000171700, ENSG00000185070, ENSG00000204435, ENSG00000055332, ENSG00000180447, ENSG00000112715, ENSG00000171791, ENSG00000112559, ENSG00000005339, ENSG00000159842, ENSG00000240771, ENSG00000137312, ENSG00000164066, ENSG00000116670, ENSG00000166444, ENSG0000…	282	2728	16650	1.08216	1	1	0.991488
GOTERM_BP_FAT	GO:0010646~regulation of cell communication	55	16.0819	0.341375	ENSG00000185507, ENSG00000174371, ENSG00000213024, ENSG00000103490, ENSG00000099864, ENSG00000197696, ENSG00000133067, ENSG00000197457, ENSG00000158445, ENSG00000003402, ENSG00000171700, ENSG00000185070, ENSG00000204435, ENSG00000055332, ENSG00000180447, ENSG00000112715, ENSG00000171791, ENSG00000112559, ENSG00000005339, ENSG00000159842, ENSG00000240771, ENSG00000137312, ENSG00000164066, ENSG0000…	282	3020	16650	1.07528	1	1	0.991488
GOTERM_BP_FAT	GO:0035023~regulation of Rho protein signal transduction	4	1.16959	0.344073	ENSG00000137135, ENSG00000240771, ENSG00000159842, ENSG00000137312	282	123	16650	1.92008	1	1	0.991488
GOTERM_BP_FAT	GO:0035556~intracellular signal transduction	48	14.0351	0.386293	ENSG00000185507, ENSG00000174371, ENSG00000176871, ENSG00000213024, ENSG00000103490, ENSG00000215788, ENSG00000181085, ENSG00000197457, ENSG00000076242, ENSG00000005882, ENSG00000136997, ENSG00000003402, ENSG00000152402, ENSG00000171700, ENSG00000112144, ENSG00000185070, ENSG00000141750, ENSG00000120899, ENSG00000166452, ENSG00000204435, ENSG00000055332, ENSG00000149599, ENSG00000270885, ENSG0000…	282	2657	16650	1.06663	1	1	0.991488
GOTERM_BP_FAT	GO:0007264~small GTPase mediated signal transduction	11	3.21637	0.396404	ENSG00000213024, ENSG00000144891, ENSG00000137135, ENSG00000197457, ENSG00000270885, ENSG00000157168, ENSG00000240771, ENSG00000159842, ENSG00000137312, ENSG00000185989, ENSG00000171700	282	527	16650	1.23239	1	1	0.991488
GOTERM_BP_FAT	GO:0042325~regulation of phosphorylation	26	7.60234	0.404024	ENSG00000213024, ENSG00000103490, ENSG00000215788, ENSG00000136997, ENSG00000185070, ENSG00000125648, ENSG00000120899, ENSG00000204435, ENSG00000055332, ENSG00000149599, ENSG00000160710, ENSG00000197381, ENSG00000112715, ENSG00000171791, ENSG00000112559, ENSG00000106538, ENSG00000157168, ENSG00000167191, ENSG00000137312, ENSG00000173457, ENSG00000166147, ENSG00000116670, ENSG00000166444, ENSG0000…	282	1393	16650	1.10201	1	1	0.991488
GOTERM_BP_FAT	GO:0036211~protein modification process	67	19.5906	0.434693	ENSG00000214357, ENSG00000176871, ENSG00000134758, ENSG00000213024, ENSG00000103490, ENSG00000133265, ENSG00000196367, ENSG00000185070, ENSG00000012963, ENSG00000166313, ENSG00000100626, ENSG00000145416, ENSG00000136098, ENSG00000184661, ENSG00000204435, ENSG00000055332, ENSG00000141934, ENSG00000100300, ENSG00000162878, ENSG00000184900, ENSG00000112715, ENSG00000128165, ENSG00000171791, ENSG0000…	282	3818	16650	1.03611	1	1	0.991488
GOTERM_BP_FAT	GO:0006464~cellular protein modification process	67	19.5906	0.434693	ENSG00000214357, ENSG00000176871, ENSG00000134758, ENSG00000213024, ENSG00000103490, ENSG00000133265, ENSG00000196367, ENSG00000185070, ENSG00000012963, ENSG00000166313, ENSG00000100626, ENSG00000145416, ENSG00000136098, ENSG00000184661, ENSG00000204435, ENSG00000055332, ENSG00000141934, ENSG00000100300, ENSG00000162878, ENSG00000184900, ENSG00000112715, ENSG00000128165, ENSG00000171791, ENSG0000…	282	3818	16650	1.03611	1	1	0.991488
GOTERM_BP_FAT	GO:0001932~regulation of protein phosphorylation	24	7.01754	0.43715	ENSG00000197381, ENSG00000112715, ENSG00000213024, ENSG00000103490, ENSG00000171791, ENSG00000215788, ENSG00000112559, ENSG00000106538, ENSG00000157168, ENSG00000167191, ENSG00000136997, ENSG00000137312, ENSG00000185070, ENSG00000166444, ENSG00000166147, ENSG00000116670, ENSG00000123999, ENSG00000120899, ENSG00000204435, ENSG00000055332, ENSG00000149599, ENSG00000146674, ENSG00000183765, ENSG0000…	282	1300	16650	1.09002	1	1	0.991488
GOTERM_BP_FAT	GO:0043410~positive regulation of MAPK cascade	10	2.92398	0.441939	ENSG00000112715, ENSG00000166444, ENSG00000103490, ENSG00000120899, ENSG00000055332, ENSG00000112559, ENSG00000215788, ENSG00000149599, ENSG00000146674, ENSG00000157168	282	485	16650	1.21737	1	1	0.991488
GOTERM_BP_FAT	GO:0051338~regulation of transferase activity	18	5.26316	0.446697	ENSG00000197381, ENSG00000112715, ENSG00000213024, ENSG00000103490, ENSG00000112559, ENSG00000181085, ENSG00000157168, ENSG00000167191, ENSG00000136997, ENSG00000185070, ENSG00000166147, ENSG00000116670, ENSG00000102977, ENSG00000120899, ENSG00000204435, ENSG00000055332, ENSG00000160710, ENSG00000127586	282	955	16650	1.11284	1	1	0.991488
GOTERM_BP_FAT	GO:0044093~positive regulation of molecular function	33	9.64912	0.456358	ENSG00000127561, ENSG00000103490, ENSG00000107957, ENSG00000181085, ENSG00000136997, ENSG00000003402, ENSG00000171700, ENSG00000120899, ENSG00000055332, ENSG00000161800, ENSG00000127586, ENSG00000112715, ENSG00000213551, ENSG00000171791, ENSG00000180340, ENSG00000065882, ENSG00000112559, ENSG00000137135, ENSG00000157168, ENSG00000167191, ENSG00000159842, ENSG00000240771, ENSG00000137312, ENSG0000…	282	1840	16650	1.05892	1	1	0.991488
GOTERM_BP_FAT	GO:0031399~regulation of protein modification process	30	8.77193	0.45647	ENSG00000213024, ENSG00000103490, ENSG00000215788, ENSG00000133265, ENSG00000136997, ENSG00000185070, ENSG00000136098, ENSG00000184661, ENSG00000120899, ENSG00000204435, ENSG00000055332, ENSG00000149599, ENSG00000100300, ENSG00000160710, ENSG00000197381, ENSG00000112715, ENSG00000132326, ENSG00000171791, ENSG00000112559, ENSG00000106538, ENSG00000157168, ENSG00000167191, ENSG00000137312, ENSG0000…	282	1664	16650	1.06447	1	1	0.991488
GOTERM_BP_FAT	GO:0006796~phosphate-containing compound metabolic process	54	15.7895	0.464856	ENSG00000213024, ENSG00000103490, ENSG00000099864, ENSG00000196367, ENSG00000185070, ENSG00000125648, ENSG00000136098, ENSG00000184661, ENSG00000204435, ENSG00000163283, ENSG00000055332, ENSG00000141934, ENSG00000100300, ENSG00000162878, ENSG00000128951, ENSG00000167525, ENSG00000112715, ENSG00000128165, ENSG00000171791, ENSG00000180340, ENSG00000112559, ENSG00000137312, ENSG00000173457, ENSG0000…	282	3083	16650	1.03415	1	1	0.991488
GOTERM_BP_FAT	GO:0031401~positive regulation of protein modification process	21	6.14035	0.467433	ENSG00000112715, ENSG00000103490, ENSG00000171791, ENSG00000215788, ENSG00000112559, ENSG00000106538, ENSG00000133265, ENSG00000157168, ENSG00000167191, ENSG00000137312, ENSG00000166444, ENSG00000166147, ENSG00000116670, ENSG00000184661, ENSG00000123999, ENSG00000120899, ENSG00000204435, ENSG00000055332, ENSG00000149599, ENSG00000146674, ENSG00000183765	282	1143	16650	1.08477	1	1	0.991488
GOTERM_BP_FAT	GO:0006793~phosphorus metabolic process	54	15.7895	0.471106	ENSG00000213024, ENSG00000103490, ENSG00000099864, ENSG00000196367, ENSG00000185070, ENSG00000125648, ENSG00000136098, ENSG00000184661, ENSG00000204435, ENSG00000163283, ENSG00000055332, ENSG00000141934, ENSG00000100300, ENSG00000162878, ENSG00000128951, ENSG00000167525, ENSG00000112715, ENSG00000128165, ENSG00000171791, ENSG00000180340, ENSG00000112559, ENSG00000137312, ENSG00000173457, ENSG0000…	282	3089	16650	1.03215	1	1	0.991488
GOTERM_BP_FAT	GO:0006468~protein phosphorylation	33	9.64912	0.471834	ENSG00000213024, ENSG00000103490, ENSG00000215788, ENSG00000181085, ENSG00000005882, ENSG00000136997, ENSG00000112144, ENSG00000185070, ENSG00000136098, ENSG00000120899, ENSG00000204435, ENSG00000055332, ENSG00000149599, ENSG00000162878, ENSG00000160710, ENSG00000197381, ENSG00000112715, ENSG00000128165, ENSG00000126561, ENSG00000171791, ENSG00000112559, ENSG00000106538, ENSG00000157168, ENSG0000…	282	1852	16650	1.05205	1	1	0.991488
GOTERM_BP_FAT	GO:0043085~positive regulation of catalytic activity	28	8.18713	0.473648	ENSG00000103490, ENSG00000107957, ENSG00000181085, ENSG00000136997, ENSG00000003402, ENSG00000171700, ENSG00000120899, ENSG00000055332, ENSG00000161800, ENSG00000127586, ENSG00000112715, ENSG00000213551, ENSG00000171791, ENSG00000065882, ENSG00000112559, ENSG00000137135, ENSG00000157168, ENSG00000167191, ENSG00000159842, ENSG00000240771, ENSG00000166147, ENSG00000166444, ENSG00000102977, ENSG0000…	282	1559	16650	1.06042	1	1	0.991488
GOTERM_BP_FAT	GO:0043408~regulation of MAPK cascade	13	3.80117	0.476227	ENSG00000112715, ENSG00000213024, ENSG00000103490, ENSG00000215788, ENSG00000112559, ENSG00000157168, ENSG00000136997, ENSG00000166444, ENSG00000123999, ENSG00000120899, ENSG00000055332, ENSG00000149599, ENSG00000146674	282	678	16650	1.13208	1	1	0.991488
GOTERM_BP_FAT	GO:0051247~positive regulation of protein metabolic process	27	7.89474	0.484771	ENSG00000134758, ENSG00000103490, ENSG00000215788, ENSG00000120949, ENSG00000133265, ENSG00000136997, ENSG00000186088, ENSG00000184661, ENSG00000120899, ENSG00000204435, ENSG00000055332, ENSG00000149599, ENSG00000112715, ENSG00000171791, ENSG00000112559, ENSG00000106538, ENSG00000157168, ENSG00000167191, ENSG00000137312, ENSG00000166147, ENSG00000116670, ENSG00000166444, ENSG00000123999, ENSG0000…	282	1508	16650	1.05713	1	1	0.991488
GOTERM_BP_FAT	GO:0043087~regulation of GTPase activity	13	3.80117	0.493404	ENSG00000103490, ENSG00000065882, ENSG00000137135, ENSG00000197457, ENSG00000157168, ENSG00000240771, ENSG00000159842, ENSG00000171700, ENSG00000166444, ENSG00000120899, ENSG00000179051, ENSG00000161800, ENSG00000185989	282	691	16650	1.11079	1	1	0.991488
GOTERM_BP_FAT	GO:0065009~regulation of molecular function	49	14.3275	0.54531	ENSG00000213024, ENSG00000103490, ENSG00000099864, ENSG00000133265, ENSG00000197457, ENSG00000003402, ENSG00000171700, ENSG00000185070, ENSG00000204435, ENSG00000055332, ENSG00000127586, ENSG00000112715, ENSG00000171791, ENSG00000180340, ENSG00000112559, ENSG00000159842, ENSG00000240771, ENSG00000137312, ENSG00000173457, ENSG00000116670, ENSG00000166444, ENSG00000185187, ENSG00000169992, ENSG0000…	282	2863	16650	1.01051	1	1	0.991488
GOTERM_BP_FAT	GO:0010647~positive regulation of cell communication	27	7.89474	0.550532	ENSG00000185507, ENSG00000213024, ENSG00000103490, ENSG00000215788, ENSG00000197696, ENSG00000133067, ENSG00000003402, ENSG00000120899, ENSG00000204435, ENSG00000055332, ENSG00000149599, ENSG00000270885, ENSG00000112715, ENSG00000171791, ENSG00000112559, ENSG00000157168, ENSG00000167191, ENSG00000137312, ENSG00000164066, ENSG00000166444, ENSG00000170837, ENSG00000169992, ENSG00000123999, ENSG0000…	282	1555	16650	1.02518	1	1	0.991488
GOTERM_BP_FAT	GO:0023056~positive regulation of signaling	27	7.89474	0.561519	ENSG00000185507, ENSG00000213024, ENSG00000103490, ENSG00000215788, ENSG00000197696, ENSG00000133067, ENSG00000003402, ENSG00000120899, ENSG00000204435, ENSG00000055332, ENSG00000149599, ENSG00000270885, ENSG00000112715, ENSG00000171791, ENSG00000112559, ENSG00000157168, ENSG00000167191, ENSG00000137312, ENSG00000164066, ENSG00000166444, ENSG00000170837, ENSG00000169992, ENSG00000123999, ENSG0000…	282	1563	16650	1.01993	1	1	0.991488
GOTERM_BP_FAT	GO:0045859~regulation of protein kinase activity	13	3.80117	0.579014	ENSG00000197381, ENSG00000112715, ENSG00000213024, ENSG00000103490, ENSG00000112559, ENSG00000157168, ENSG00000167191, ENSG00000185070, ENSG00000166147, ENSG00000120899, ENSG00000204435, ENSG00000055332, ENSG00000160710	282	730	16650	1.05144	1	1	0.991488
GOTERM_BP_FAT	GO:0050790~regulation of catalytic activity	40	11.6959	0.579861	ENSG00000213024, ENSG00000099864, ENSG00000103490, ENSG00000107957, ENSG00000133265, ENSG00000181085, ENSG00000197457, ENSG00000136997, ENSG00000003402, ENSG00000171700, ENSG00000185070, ENSG00000120899, ENSG00000204435, ENSG00000055332, ENSG00000161800, ENSG00000160710, ENSG00000127586, ENSG00000197381, ENSG00000112715, ENSG00000213551, ENSG00000171791, ENSG00000065882, ENSG00000112559, ENSG0000…	282	2357	16650	1.00199	1	1	0.991488
GOTERM_BP_FAT	GO:0051345~positive regulation of hydrolase activity	16	4.67836	0.587612	ENSG00000112715, ENSG00000213551, ENSG00000103490, ENSG00000065882, ENSG00000137135, ENSG00000157168, ENSG00000136997, ENSG00000240771, ENSG00000159842, ENSG00000171700, ENSG00000166444, ENSG00000120899, ENSG00000179051, ENSG00000144891, ENSG00000161800, ENSG00000185989	282	917	16650	1.03019	1	1	0.991488
GOTERM_BP_FAT	GO:0032270~positive regulation of cellular protein metabolic process	24	7.01754	0.6138	ENSG00000134758, ENSG00000112715, ENSG00000103490, ENSG00000171791, ENSG00000215788, ENSG00000112559, ENSG00000106538, ENSG00000133265, ENSG00000157168, ENSG00000167191, ENSG00000136997, ENSG00000137312, ENSG00000166444, ENSG00000166147, ENSG00000116670, ENSG00000184661, ENSG00000123999, ENSG00000120899, ENSG00000204435, ENSG00000055332, ENSG00000149599, ENSG00000144891, ENSG00000146674, ENSG0000…	282	1420	16650	0.997902	1	1	0.991488
GOTERM_BP_FAT	GO:0009967~positive regulation of signal transduction	24	7.01754	0.624782	ENSG00000185507, ENSG00000112715, ENSG00000213024, ENSG00000103490, ENSG00000171791, ENSG00000215788, ENSG00000112559, ENSG00000133067, ENSG00000157168, ENSG00000167191, ENSG00000003402, ENSG00000137312, ENSG00000164066, ENSG00000166444, ENSG00000170837, ENSG00000123999, ENSG00000120899, ENSG00000169992, ENSG00000204435, ENSG00000164362, ENSG00000055332, ENSG00000149599, ENSG00000146674, ENSG0000…	282	1428	16650	0.992312	1	1	0.991488
GOTERM_BP_FAT	GO:0043547~positive regulation of GTPase activity	11	3.21637	0.631487	ENSG00000166444, ENSG00000065882, ENSG00000120899, ENSG00000179051, ENSG00000137135, ENSG00000157168, ENSG00000161800, ENSG00000240771, ENSG00000159842, ENSG00000185989, ENSG00000171700	282	634	16650	1.0244	1	1	0.991488
GOTERM_BP_FAT	GO:0016310~phosphorylation	37	10.8187	0.639123	ENSG00000213024, ENSG00000103490, ENSG00000215788, ENSG00000181085, ENSG00000196367, ENSG00000005882, ENSG00000136997, ENSG00000154027, ENSG00000112144, ENSG00000185070, ENSG00000125648, ENSG00000136098, ENSG00000120899, ENSG00000204435, ENSG00000055332, ENSG00000149599, ENSG00000162878, ENSG00000160710, ENSG00000197381, ENSG00000112715, ENSG00000128165, ENSG00000126561, ENSG00000171791, ENSG0000…	282	2229	16650	0.980069	1	1	0.991488
GOTERM_BP_FAT	GO:0000165~MAPK cascade	14	4.09357	0.667558	ENSG00000112715, ENSG00000213024, ENSG00000103490, ENSG00000215788, ENSG00000112559, ENSG00000181085, ENSG00000157168, ENSG00000136997, ENSG00000166444, ENSG00000120899, ENSG00000055332, ENSG00000149599, ENSG00000146674, ENSG00000185989	282	841	16650	0.982872	1	1	0.991488
GOTERM_BP_FAT	GO:1902531~regulation of intracellular signal transduction	28	8.18713	0.677475	ENSG00000174371, ENSG00000213024, ENSG00000103490, ENSG00000215788, ENSG00000197457, ENSG00000136997, ENSG00000003402, ENSG00000185070, ENSG00000120899, ENSG00000166452, ENSG00000204435, ENSG00000055332, ENSG00000149599, ENSG00000161800, ENSG00000112715, ENSG00000171791, ENSG00000112559, ENSG00000137135, ENSG00000157168, ENSG00000167191, ENSG00000159842, ENSG00000240771, ENSG00000137312, ENSG0000…	282	1714	16650	0.964522	1	1	0.991488
GOTERM_BP_FAT	GO:0051246~regulation of protein metabolic process	41	11.9883	0.681502	ENSG00000134758, ENSG00000214575, ENSG00000213024, ENSG00000103490, ENSG00000215788, ENSG00000120949, ENSG00000133265, ENSG00000136997, ENSG00000185070, ENSG00000166313, ENSG00000136098, ENSG00000186088, ENSG00000184661, ENSG00000120899, ENSG00000182240, ENSG00000204435, ENSG00000055332, ENSG00000149599, ENSG00000125821, ENSG00000100300, ENSG00000160710, ENSG00000180447, ENSG00000197381, ENSG0000…	282	2512	16650	0.963672	1	1	0.991488
GOTERM_BP_FAT	GO:0043549~regulation of kinase activity	13	3.80117	0.683756	ENSG00000197381, ENSG00000112715, ENSG00000213024, ENSG00000103490, ENSG00000112559, ENSG00000157168, ENSG00000167191, ENSG00000185070, ENSG00000166147, ENSG00000120899, ENSG00000204435, ENSG00000055332, ENSG00000160710	282	788	16650	0.974052	1	1	0.991488
GOTERM_BP_FAT	GO:0048584~positive regulation of response to stimulus	33	9.64912	0.68814	ENSG00000185507, ENSG00000213024, ENSG00000103490, ENSG00000215788, ENSG00000133067, ENSG00000136997, ENSG00000003402, ENSG00000166313, ENSG00000120899, ENSG00000204435, ENSG00000055332, ENSG00000149599, ENSG00000112715, ENSG00000255690, ENSG00000171791, ENSG00000112559, ENSG00000106538, ENSG00000129194, ENSG00000157168, ENSG00000170485, ENSG00000005339, ENSG00000167191, ENSG00000137312, ENSG0000…	282	2030	16650	0.959805	1	1	0.991488
GOTERM_BP_FAT	GO:0023014~signal transduction by protein phosphorylation	14	4.09357	0.724173	ENSG00000112715, ENSG00000213024, ENSG00000103490, ENSG00000215788, ENSG00000112559, ENSG00000181085, ENSG00000157168, ENSG00000136997, ENSG00000166444, ENSG00000120899, ENSG00000055332, ENSG00000149599, ENSG00000146674, ENSG00000185989	282	877	16650	0.942527	1	1	0.991488
GOTERM_BP_FAT	GO:1902533~positive regulation of intracellular signal transduction	14	4.09357	0.776951	ENSG00000112715, ENSG00000213024, ENSG00000103490, ENSG00000171791, ENSG00000215788, ENSG00000112559, ENSG00000157168, ENSG00000167191, ENSG00000003402, ENSG00000166444, ENSG00000120899, ENSG00000055332, ENSG00000149599, ENSG00000146674	282	915	16650	0.903383	1	1	0.991488
GOTERM_BP_FAT	GO:0071900~regulation of protein serine/threonine kinase activity	7	2.04678	0.818088	ENSG00000112715, ENSG00000213024, ENSG00000103490, ENSG00000120899, ENSG00000055332, ENSG00000112559, ENSG00000157168	282	476	16650	0.868273	1	1	0.991488
GOTERM_BP_FAT	GO:0032268~regulation of cellular protein metabolic process	35	10.2339	0.854669	ENSG00000134758, ENSG00000214575, ENSG00000213024, ENSG00000103490, ENSG00000215788, ENSG00000133265, ENSG00000136997, ENSG00000185070, ENSG00000136098, ENSG00000184661, ENSG00000120899, ENSG00000204435, ENSG00000055332, ENSG00000149599, ENSG00000125821, ENSG00000100300, ENSG00000160710, ENSG00000180447, ENSG00000197381, ENSG00000112715, ENSG00000132326, ENSG00000171791, ENSG00000112559, ENSG0000…	282	2346	16650	0.880857	1	1	0.991488
GOTERM_BP_FAT	GO:0051336~regulation of hydrolase activity	19	5.55556	0.871035	ENSG00000112715, ENSG00000213551, ENSG00000103490, ENSG00000065882, ENSG00000137135, ENSG00000197457, ENSG00000157168, ENSG00000136997, ENSG00000240771, ENSG00000159842, ENSG00000171700, ENSG00000166444, ENSG00000120899, ENSG00000204435, ENSG00000179051, ENSG00000144891, ENSG00000161800, ENSG00000185989, ENSG00000140398	282	1337	16650	0.839049	1	1	0.991488
Annotation Cluster 82	Enrichment Score: 0.4256667894703356
Category	Term	Count	%	PValue	Genes	List Total	Pop Hits	Pop Total	Fold Enrichment	Bonferroni	Benjamini	FDR
GOTERM_BP_FAT	GO:2000021~regulation of ion homeostasis	8	2.33918	0.0522957	ENSG00000104321, ENSG00000125648, ENSG00000171791, ENSG00000120899, ENSG00000144891, ENSG00000100300, ENSG00000169418, ENSG00000185989	282	199	16650	2.37357	1	1	0.991488
GOTERM_BP_FAT	GO:0032844~regulation of homeostatic process	13	3.80117	0.0813414	ENSG00000104321, ENSG00000171791, ENSG00000181085, ENSG00000136997, ENSG00000170837, ENSG00000125648, ENSG00000102977, ENSG00000120899, ENSG00000144891, ENSG00000100300, ENSG00000169418, ENSG00000185989, ENSG00000162367	282	451	16650	1.70189	1	1	0.991488
GOTERM_BP_FAT	GO:0048878~chemical homeostasis	24	7.01754	0.119405	ENSG00000104321, ENSG00000112715, ENSG00000176273, ENSG00000213694, ENSG00000132749, ENSG00000171791, ENSG00000197696, ENSG00000135740, ENSG00000158445, ENSG00000005882, ENSG00000167191, ENSG00000136997, ENSG00000175707, ENSG00000147804, ENSG00000166147, ENSG00000170837, ENSG00000125648, ENSG00000204267, ENSG00000120899, ENSG00000144891, ENSG00000100300, ENSG00000169418, ENSG00000185989, ENSG0000…	282	1049	16650	1.35083	1	1	0.991488
GOTERM_BP_FAT	GO:0050801~ion homeostasis	16	4.67836	0.205092	ENSG00000104321, ENSG00000176273, ENSG00000213694, ENSG00000132749, ENSG00000171791, ENSG00000197696, ENSG00000135740, ENSG00000005882, ENSG00000136997, ENSG00000147804, ENSG00000125648, ENSG00000120899, ENSG00000144891, ENSG00000100300, ENSG00000169418, ENSG00000185989	282	699	16650	1.35147	1	1	0.991488
GOTERM_BP_FAT	GO:0042592~homeostatic process	33	9.64912	0.22212	ENSG00000104321, ENSG00000176273, ENSG00000197696, ENSG00000135740, ENSG00000181085, ENSG00000158445, ENSG00000005882, ENSG00000136997, ENSG00000125648, ENSG00000120899, ENSG00000183773, ENSG00000100300, ENSG00000160710, ENSG00000112715, ENSG00000213694, ENSG00000171791, ENSG00000132749, ENSG00000005339, ENSG00000167191, ENSG00000147804, ENSG00000175707, ENSG00000166147, ENSG00000170837, ENSG0000…	282	1645	16650	1.18444	1	1	0.991488
GOTERM_BP_FAT	GO:0051480~regulation of cytosolic calcium ion concentration	8	2.33918	0.227508	ENSG00000104321, ENSG00000176273, ENSG00000213694, ENSG00000171791, ENSG00000120899, ENSG00000197696, ENSG00000144891, ENSG00000185989	282	292	16650	1.6176	1	1	0.991488
GOTERM_BP_FAT	GO:0051282~regulation of sequestering of calcium ion	4	1.16959	0.284057	ENSG00000104321, ENSG00000125648, ENSG00000120899, ENSG00000185989	282	110	16650	2.147	1	1	0.991488
GOTERM_BP_FAT	GO:0055080~cation homeostasis	14	4.09357	0.291541	ENSG00000104321, ENSG00000176273, ENSG00000213694, ENSG00000132749, ENSG00000171791, ENSG00000197696, ENSG00000135740, ENSG00000005882, ENSG00000136997, ENSG00000147804, ENSG00000120899, ENSG00000144891, ENSG00000169418, ENSG00000185989	282	643	16650	1.28553	1	1	0.991488
GOTERM_BP_FAT	GO:0007204~positive regulation of cytosolic calcium ion concentration	7	2.04678	0.302821	ENSG00000104321, ENSG00000213694, ENSG00000171791, ENSG00000120899, ENSG00000197696, ENSG00000144891, ENSG00000185989	282	269	16650	1.53642	1	1	0.991488
GOTERM_BP_FAT	GO:0055082~cellular chemical homeostasis	15	4.38596	0.313705	ENSG00000104321, ENSG00000176273, ENSG00000213694, ENSG00000132749, ENSG00000171791, ENSG00000197696, ENSG00000135740, ENSG00000158445, ENSG00000136997, ENSG00000147804, ENSG00000170837, ENSG00000120899, ENSG00000144891, ENSG00000185989, ENSG00000161798	282	713	16650	1.24213	1	1	0.991488
GOTERM_BP_FAT	GO:0006875~cellular metal ion homeostasis	11	3.21637	0.316898	ENSG00000104321, ENSG00000147804, ENSG00000176273, ENSG00000213694, ENSG00000132749, ENSG00000171791, ENSG00000120899, ENSG00000197696, ENSG00000144891, ENSG00000136997, ENSG00000185989	282	491	16650	1.32275	1	1	0.991488
GOTERM_BP_FAT	GO:0098771~inorganic ion homeostasis	14	4.09357	0.320209	ENSG00000104321, ENSG00000176273, ENSG00000213694, ENSG00000132749, ENSG00000171791, ENSG00000197696, ENSG00000135740, ENSG00000005882, ENSG00000136997, ENSG00000147804, ENSG00000120899, ENSG00000144891, ENSG00000169418, ENSG00000185989	282	658	16650	1.25622	1	1	0.991488
GOTERM_BP_FAT	GO:0019725~cellular homeostasis	17	4.97076	0.333036	ENSG00000104321, ENSG00000176273, ENSG00000213694, ENSG00000132749, ENSG00000171791, ENSG00000197696, ENSG00000135740, ENSG00000158445, ENSG00000136997, ENSG00000147804, ENSG00000170837, ENSG00000120899, ENSG00000183773, ENSG00000144891, ENSG00000162882, ENSG00000185989, ENSG00000161798	282	833	16650	1.20495	1	1	0.991488
GOTERM_BP_FAT	GO:0055065~metal ion homeostasis	12	3.50877	0.33831	ENSG00000104321, ENSG00000147804, ENSG00000176273, ENSG00000213694, ENSG00000132749, ENSG00000171791, ENSG00000120899, ENSG00000197696, ENSG00000144891, ENSG00000136997, ENSG00000169418, ENSG00000185989	282	558	16650	1.26973	1	1	0.991488
GOTERM_BP_FAT	GO:0033555~multicellular organismal response to stress	3	0.877193	0.343648	ENSG00000104321, ENSG00000171791, ENSG00000100300	282	72	16650	2.46011	1	1	0.991488
GOTERM_BP_FAT	GO:0051235~maintenance of location	7	2.04678	0.361821	ENSG00000104321, ENSG00000158747, ENSG00000166147, ENSG00000120899, ENSG00000112559, ENSG00000100300, ENSG00000185989	282	290	16650	1.42517	1	1	0.991488
GOTERM_BP_FAT	GO:0030003~cellular cation homeostasis	12	3.50877	0.380433	ENSG00000104321, ENSG00000147804, ENSG00000176273, ENSG00000213694, ENSG00000132749, ENSG00000171791, ENSG00000120899, ENSG00000197696, ENSG00000135740, ENSG00000144891, ENSG00000136997, ENSG00000185989	282	573	16650	1.23649	1	1	0.991488
GOTERM_BP_FAT	GO:0060402~calcium ion transport into cytosol	4	1.16959	0.380883	ENSG00000104321, ENSG00000171791, ENSG00000120899, ENSG00000185989	282	131	16650	1.80283	1	1	0.991488
GOTERM_BP_FAT	GO:0060401~cytosolic calcium ion transport	4	1.16959	0.390024	ENSG00000104321, ENSG00000171791, ENSG00000120899, ENSG00000185989	282	133	16650	1.77572	1	1	0.991488
GOTERM_BP_FAT	GO:0010035~response to inorganic substance	10	2.92398	0.394319	ENSG00000104321, ENSG00000166313, ENSG00000125648, ENSG00000132749, ENSG00000171791, ENSG00000120899, ENSG00000164362, ENSG00000100300, ENSG00000162882, ENSG00000136997	282	469	16650	1.2589	1	1	0.991488
GOTERM_BP_FAT	GO:0072503~cellular divalent inorganic cation homeostasis	9	2.63158	0.395574	ENSG00000104321, ENSG00000147804, ENSG00000176273, ENSG00000213694, ENSG00000171791, ENSG00000120899, ENSG00000197696, ENSG00000144891, ENSG00000185989	282	413	16650	1.28664	1	1	0.991488
GOTERM_BP_FAT	GO:0006873~cellular ion homeostasis	12	3.50877	0.40634	ENSG00000104321, ENSG00000147804, ENSG00000176273, ENSG00000213694, ENSG00000132749, ENSG00000171791, ENSG00000120899, ENSG00000197696, ENSG00000135740, ENSG00000144891, ENSG00000136997, ENSG00000185989	282	588	16650	1.20495	1	1	0.991488
GOTERM_BP_FAT	GO:2000379~positive regulation of reactive oxygen species metabolic process	3	0.877193	0.433256	ENSG00000120899, ENSG00000144891, ENSG00000100300	282	87	16650	2.03595	1	1	0.991488
GOTERM_BP_FAT	GO:0072507~divalent inorganic cation homeostasis	9	2.63158	0.441209	ENSG00000104321, ENSG00000147804, ENSG00000176273, ENSG00000213694, ENSG00000171791, ENSG00000120899, ENSG00000197696, ENSG00000144891, ENSG00000185989	282	433	16650	1.22721	1	1	0.991488
GOTERM_BP_FAT	GO:0000302~response to reactive oxygen species	5	1.46199	0.476359	ENSG00000104321, ENSG00000171791, ENSG00000120899, ENSG00000005882, ENSG00000116157	282	210	16650	1.40578	1	1	0.991488
GOTERM_BP_FAT	GO:2000377~regulation of reactive oxygen species metabolic process	4	1.16959	0.478995	ENSG00000171791, ENSG00000120899, ENSG00000144891, ENSG00000100300	282	153	16650	1.5436	1	1	0.991488
GOTERM_BP_FAT	GO:0006874~cellular calcium ion homeostasis	8	2.33918	0.495784	ENSG00000104321, ENSG00000176273, ENSG00000213694, ENSG00000171791, ENSG00000120899, ENSG00000197696, ENSG00000144891, ENSG00000185989	282	393	16650	1.20188	1	1	0.991488
GOTERM_BP_FAT	GO:0006979~response to oxidative stress	8	2.33918	0.499767	ENSG00000104321, ENSG00000165474, ENSG00000147813, ENSG00000171791, ENSG00000120899, ENSG00000005882, ENSG00000140398, ENSG00000116157	282	394	16650	1.19883	1	1	0.991488
GOTERM_BP_FAT	GO:0070509~calcium ion import	4	1.16959	0.5129	ENSG00000104321, ENSG00000125648, ENSG00000120899, ENSG00000185989	282	161	16650	1.4669	1	1	0.991488
GOTERM_BP_FAT	GO:0072593~reactive oxygen species metabolic process	5	1.46199	0.517758	ENSG00000171791, ENSG00000120899, ENSG00000107957, ENSG00000144891, ENSG00000100300	282	222	16650	1.32979	1	1	0.991488
GOTERM_BP_FAT	GO:0055074~calcium ion homeostasis	8	2.33918	0.539604	ENSG00000104321, ENSG00000176273, ENSG00000213694, ENSG00000171791, ENSG00000120899, ENSG00000197696, ENSG00000144891, ENSG00000185989	282	405	16650	1.16627	1	1	0.991488
GOTERM_BP_FAT	GO:0070838~divalent metal ion transport	8	2.33918	0.561681	ENSG00000104321, ENSG00000147804, ENSG00000176273, ENSG00000125648, ENSG00000171791, ENSG00000120899, ENSG00000100300, ENSG00000185989	282	418	16650	1.13	1	1	0.991488
GOTERM_BP_FAT	GO:0051208~sequestering of calcium ion	3	0.877193	0.566475	ENSG00000104321, ENSG00000120899, ENSG00000185989	282	112	16650	1.5815	1	1	0.991488
GOTERM_BP_FAT	GO:0072511~divalent inorganic cation transport	8	2.33918	0.569284	ENSG00000104321, ENSG00000147804, ENSG00000176273, ENSG00000125648, ENSG00000171791, ENSG00000120899, ENSG00000100300, ENSG00000185989	282	421	16650	1.12195	1	1	0.991488
GOTERM_BP_FAT	GO:0032845~negative regulation of homeostatic process	4	1.16959	0.573347	ENSG00000104321, ENSG00000102977, ENSG00000171791, ENSG00000185989	282	176	16650	1.34188	1	1	0.991488
GOTERM_BP_FAT	GO:0006816~calcium ion transport	7	2.04678	0.593869	ENSG00000104321, ENSG00000176273, ENSG00000125648, ENSG00000171791, ENSG00000120899, ENSG00000100300, ENSG00000185989	282	369	16650	1.12005	1	1	0.991488
GOTERM_BP_FAT	GO:0051238~sequestering of metal ion	3	0.877193	0.617552	ENSG00000104321, ENSG00000120899, ENSG00000185989	282	123	16650	1.44006	1	1	0.991488
GOTERM_BP_FAT	GO:0042542~response to hydrogen peroxide	3	0.877193	0.626328	ENSG00000104321, ENSG00000171791, ENSG00000120899	282	125	16650	1.41702	1	1	0.991488
GOTERM_BP_FAT	GO:0010959~regulation of metal ion transport	6	1.75439	0.636313	ENSG00000183072, ENSG00000171791, ENSG00000120899, ENSG00000100300, ENSG00000069482, ENSG00000124134	282	322	16650	1.10017	1	1	0.991488
GOTERM_BP_FAT	GO:0070588~calcium ion transmembrane transport	4	1.16959	0.826001	ENSG00000104321, ENSG00000125648, ENSG00000120899, ENSG00000185989	282	264	16650	0.894584	1	1	0.991488
GOTERM_BP_FAT	GO:0051924~regulation of calcium ion transport	3	0.877193	0.861869	ENSG00000171791, ENSG00000120899, ENSG00000100300	282	204	16650	0.868273	1	1	0.991488
Annotation Cluster 83	Enrichment Score: 0.4216262743492114
Category	Term	Count	%	PValue	Genes	List Total	Pop Hits	Pop Total	Fold Enrichment	Bonferroni	Benjamini	FDR
GOTERM_BP_FAT	GO:0045600~positive regulation of fat cell differentiation	3	0.877193	0.225084	ENSG00000106538, ENSG00000151468, ENSG00000142611	282	53	16650	3.34203	1	1	0.991488
GOTERM_BP_FAT	GO:0045444~fat cell differentiation	5	1.46199	0.426182	ENSG00000132326, ENSG00000106538, ENSG00000151468, ENSG00000171488, ENSG00000142611	282	197	16650	1.49854	1	1	0.991488
GOTERM_BP_FAT	GO:0045598~regulation of fat cell differentiation	3	0.877193	0.566475	ENSG00000106538, ENSG00000151468, ENSG00000142611	282	112	16650	1.5815	1	1	0.991488
Annotation Cluster 84	Enrichment Score: 0.414059355621744
Category	Term	Count	%	PValue	Genes	List Total	Pop Hits	Pop Total	Fold Enrichment	Bonferroni	Benjamini	FDR
GOTERM_BP_FAT	GO:0060840~artery development	4	1.16959	0.144932	ENSG00000103241, ENSG00000112715, ENSG00000113083, ENSG00000081479	282	78	16650	3.02782	1	1	0.991488
GOTERM_BP_FAT	GO:0060541~respiratory system development	5	1.46199	0.451324	ENSG00000103241, ENSG00000112715, ENSG00000113083, ENSG00000178860, ENSG00000162878	282	203	16650	1.45425	1	1	0.991488
GOTERM_BP_FAT	GO:0030324~lung development	4	1.16959	0.573347	ENSG00000103241, ENSG00000112715, ENSG00000113083, ENSG00000162878	282	176	16650	1.34188	1	1	0.991488
GOTERM_BP_FAT	GO:0030323~respiratory tube development	4	1.16959	0.588426	ENSG00000103241, ENSG00000112715, ENSG00000113083, ENSG00000162878	282	180	16650	1.31206	1	1	0.991488
Annotation Cluster 85	Enrichment Score: 0.41207456144002436
Category	Term	Count	%	PValue	Genes	List Total	Pop Hits	Pop Total	Fold Enrichment	Bonferroni	Benjamini	FDR
GOTERM_BP_FAT	GO:1903305~regulation of regulated secretory pathway	7	2.04678	0.0161654	ENSG00000047621, ENSG00000103241, ENSG00000213023, ENSG00000183186, ENSG00000158445, ENSG00000139973, ENSG00000159842	282	120	16650	3.44415	1	0.727378	0.721021
GOTERM_BP_FAT	GO:0017157~regulation of exocytosis	8	2.33918	0.0300185	ENSG00000047621, ENSG00000103241, ENSG00000213023, ENSG00000183186, ENSG00000110723, ENSG00000158445, ENSG00000139973, ENSG00000159842	282	176	16650	2.68375	1	0.945801	0.937535
GOTERM_BP_FAT	GO:0007215~glutamate receptor signaling pathway	4	1.16959	0.118265	ENSG00000169992, ENSG00000120899, ENSG00000158445, ENSG00000139874	282	71	16650	3.32634	1	1	0.991488
GOTERM_BP_FAT	GO:0017158~regulation of calcium ion-dependent exocytosis	4	1.16959	0.133269	ENSG00000213023, ENSG00000183186, ENSG00000158445, ENSG00000139973	282	75	16650	3.14894	1	1	0.991488
GOTERM_BP_FAT	GO:0048791~calcium ion-regulated exocytosis of neurotransmitter	3	0.877193	0.14026	ENSG00000213023, ENSG00000183186, ENSG00000139973	282	39	16650	4.54173	1	1	0.991488
GOTERM_BP_FAT	GO:0017156~calcium ion regulated exocytosis	4	1.16959	0.29326	ENSG00000213023, ENSG00000183186, ENSG00000158445, ENSG00000139973	282	112	16650	2.10866	1	1	0.991488
GOTERM_BP_FAT	GO:0099504~synaptic vesicle cycle	4	1.16959	0.307099	ENSG00000213023, ENSG00000169992, ENSG00000183186, ENSG00000139973	282	115	16650	2.05365	1	1	0.991488
GOTERM_BP_FAT	GO:0097479~synaptic vesicle localization	4	1.16959	0.394582	ENSG00000213023, ENSG00000169992, ENSG00000183186, ENSG00000139973	282	134	16650	1.76246	1	1	0.991488
GOTERM_BP_FAT	GO:0099643~signal release from synapse	4	1.16959	0.417231	ENSG00000213023, ENSG00000104863, ENSG00000183186, ENSG00000139973	282	139	16650	1.69907	1	1	0.991488
GOTERM_BP_FAT	GO:0007269~neurotransmitter secretion	4	1.16959	0.417231	ENSG00000213023, ENSG00000104863, ENSG00000183186, ENSG00000139973	282	139	16650	1.69907	1	1	0.991488
GOTERM_BP_FAT	GO:0001505~regulation of neurotransmitter levels	5	1.46199	0.426182	ENSG00000213023, ENSG00000132326, ENSG00000104863, ENSG00000183186, ENSG00000139973	282	197	16650	1.49854	1	1	0.991488
GOTERM_BP_FAT	GO:0006836~neurotransmitter transport	5	1.46199	0.426182	ENSG00000213023, ENSG00000132326, ENSG00000104863, ENSG00000183186, ENSG00000139973	282	197	16650	1.49854	1	1	0.991488
GOTERM_BP_FAT	GO:0016079~synaptic vesicle exocytosis	3	0.877193	0.427474	ENSG00000213023, ENSG00000183186, ENSG00000139973	282	86	16650	2.05962	1	1	0.991488
GOTERM_BP_FAT	GO:0099531~presynaptic process involved in chemical synaptic transmission	4	1.16959	0.444036	ENSG00000213023, ENSG00000104863, ENSG00000183186, ENSG00000139973	282	145	16650	1.62876	1	1	0.991488
GOTERM_BP_FAT	GO:0099003~vesicle mediated transport in synapse	3	0.877193	0.515947	ENSG00000213023, ENSG00000183186, ENSG00000139973	282	102	16650	1.73655	1	1	0.991488
GOTERM_BP_FAT	GO:0048284~organelle fusion	4	1.16959	0.521194	ENSG00000213023, ENSG00000187553, ENSG00000183186, ENSG00000139973	282	163	16650	1.4489	1	1	0.991488
GOTERM_BP_FAT	GO:0006906~vesicle fusion	3	0.877193	0.561596	ENSG00000213023, ENSG00000183186, ENSG00000139973	282	111	16650	1.59574	1	1	0.991488
GOTERM_BP_FAT	GO:0051656~establishment of organelle localization	8	2.33918	0.566756	ENSG00000103241, ENSG00000213023, ENSG00000134690, ENSG00000183186, ENSG00000237649, ENSG00000117724, ENSG00000076242, ENSG00000139973	282	420	16650	1.12462	1	1	0.991488
GOTERM_BP_FAT	GO:0007268~chemical synaptic transmission	11	3.21637	0.56999	ENSG00000213023, ENSG00000104863, ENSG00000169992, ENSG00000183186, ENSG00000120899, ENSG00000170175, ENSG00000173621, ENSG00000158445, ENSG00000139973, ENSG00000139874, ENSG00000137312	282	604	16650	1.07528	1	1	0.991488
GOTERM_BP_FAT	GO:0098916~anterograde trans-synaptic signaling	11	3.21637	0.56999	ENSG00000213023, ENSG00000104863, ENSG00000169992, ENSG00000183186, ENSG00000120899, ENSG00000170175, ENSG00000173621, ENSG00000158445, ENSG00000139973, ENSG00000139874, ENSG00000137312	282	604	16650	1.07528	1	1	0.991488
GOTERM_BP_FAT	GO:0099536~synaptic signaling	11	3.21637	0.56999	ENSG00000213023, ENSG00000104863, ENSG00000169992, ENSG00000183186, ENSG00000120899, ENSG00000170175, ENSG00000173621, ENSG00000158445, ENSG00000139973, ENSG00000139874, ENSG00000137312	282	604	16650	1.07528	1	1	0.991488
GOTERM_BP_FAT	GO:0099537~trans-synaptic signaling	11	3.21637	0.56999	ENSG00000213023, ENSG00000104863, ENSG00000169992, ENSG00000183186, ENSG00000120899, ENSG00000170175, ENSG00000173621, ENSG00000158445, ENSG00000139973, ENSG00000139874, ENSG00000137312	282	604	16650	1.07528	1	1	0.991488
GOTERM_BP_FAT	GO:0090174~organelle membrane fusion	3	0.877193	0.585598	ENSG00000213023, ENSG00000183186, ENSG00000139973	282	116	16650	1.52696	1	1	0.991488
GOTERM_BP_FAT	GO:0048489~synaptic vesicle transport	3	0.877193	0.634947	ENSG00000213023, ENSG00000183186, ENSG00000139973	282	127	16650	1.39471	1	1	0.991488
GOTERM_BP_FAT	GO:0097480~establishment of synaptic vesicle localization	3	0.877193	0.634947	ENSG00000213023, ENSG00000183186, ENSG00000139973	282	127	16650	1.39471	1	1	0.991488
GOTERM_BP_FAT	GO:0044801~single-organism membrane fusion	3	0.877193	0.742955	ENSG00000213023, ENSG00000183186, ENSG00000139973	282	156	16650	1.13543	1	1	0.991488
GOTERM_BP_FAT	GO:0051648~vesicle localization	4	1.16959	0.805633	ENSG00000213023, ENSG00000169992, ENSG00000183186, ENSG00000139973	282	254	16650	0.929804	1	1	0.991488
GOTERM_BP_FAT	GO:0061025~membrane fusion	3	0.877193	0.835889	ENSG00000213023, ENSG00000183186, ENSG00000139973	282	191	16650	0.92737	1	1	0.991488
GOTERM_BP_FAT	GO:0050804~modulation of synaptic transmission	4	1.16959	0.854798	ENSG00000169992, ENSG00000120899, ENSG00000158445, ENSG00000137312	282	280	16650	0.843465	1	1	0.991488
GOTERM_BP_FAT	GO:0016050~vesicle organization	4	1.16959	0.877937	ENSG00000213023, ENSG00000171791, ENSG00000183186, ENSG00000139973	282	295	16650	0.800577	1	1	0.991488
GOTERM_BP_FAT	GO:0051650~establishment of vesicle localization	3	0.877193	0.917719	ENSG00000213023, ENSG00000183186, ENSG00000139973	282	242	16650	0.731932	1	1	0.991488
Annotation Cluster 86	Enrichment Score: 0.4111136315923631
Category	Term	Count	%	PValue	Genes	List Total	Pop Hits	Pop Total	Fold Enrichment	Bonferroni	Benjamini	FDR
GOTERM_BP_FAT	GO:0010608~posttranscriptional regulation of gene expression	11	3.21637	0.27723	ENSG00000123737, ENSG00000120699, ENSG00000112183, ENSG00000214575, ENSG00000140350, ENSG00000132326, ENSG00000120899, ENSG00000164362, ENSG00000055332, ENSG00000125821, ENSG00000160710	282	472	16650	1.37599	1	1	0.991488
GOTERM_BP_FAT	GO:0043488~regulation of mRNA stability	4	1.16959	0.444036	ENSG00000123737, ENSG00000120699, ENSG00000112183, ENSG00000140350	282	145	16650	1.62876	1	1	0.991488
GOTERM_BP_FAT	GO:0043487~regulation of RNA stability	4	1.16959	0.47468	ENSG00000123737, ENSG00000120699, ENSG00000112183, ENSG00000140350	282	152	16650	1.55375	1	1	0.991488
Annotation Cluster 87	Enrichment Score: 0.4108352948100935
Category	Term	Count	%	PValue	Genes	List Total	Pop Hits	Pop Total	Fold Enrichment	Bonferroni	Benjamini	FDR
GOTERM_BP_FAT	GO:0051302~regulation of cell division	6	1.75439	0.0749427	ENSG00000164066, ENSG00000175707, ENSG00000112715, ENSG00000161800, ENSG00000136997, ENSG00000162367	282	133	16650	2.66357	1	1	0.991488
GOTERM_BP_FAT	GO:0050673~epithelial cell proliferation	7	2.04678	0.534141	ENSG00000164066, ENSG00000171812, ENSG00000175707, ENSG00000112715, ENSG00000126561, ENSG00000146674, ENSG00000136997	282	347	16650	1.19106	1	1	0.991488
GOTERM_BP_FAT	GO:0050678~regulation of epithelial cell proliferation	5	1.46199	0.748672	ENSG00000164066, ENSG00000175707, ENSG00000112715, ENSG00000126561, ENSG00000136997	282	300	16650	0.984043	1	1	0.991488
GOTERM_BP_FAT	GO:0050679~positive regulation of epithelial cell proliferation	3	0.877193	0.758546	ENSG00000112715, ENSG00000126561, ENSG00000136997	282	161	16650	1.10017	1	1	0.991488
Annotation Cluster 88	Enrichment Score: 0.40309563940384463
Category	Term	Count	%	PValue	Genes	List Total	Pop Hits	Pop Total	Fold Enrichment	Bonferroni	Benjamini	FDR
GOTERM_BP_FAT	GO:0007589~body fluid secretion	4	1.16959	0.177531	ENSG00000112715, ENSG00000126561, ENSG00000169418, ENSG00000161798	282	86	16650	2.74617	1	1	0.991488
GOTERM_BP_FAT	GO:0032941~secretion by tissue	3	0.877193	0.374141	ENSG00000112715, ENSG00000126561, ENSG00000161798	282	77	16650	2.30036	1	1	0.991488
GOTERM_BP_FAT	GO:0050878~regulation of body fluid levels	6	1.75439	0.929833	ENSG00000175707, ENSG00000112715, ENSG00000126561, ENSG00000130700, ENSG00000169418, ENSG00000161798	282	503	16650	0.704285	1	1	0.991488
Annotation Cluster 89	Enrichment Score: 0.40039160488001035
Category	Term	Count	%	PValue	Genes	List Total	Pop Hits	Pop Total	Fold Enrichment	Bonferroni	Benjamini	FDR
GOTERM_BP_FAT	GO:0022037~metencephalon development	4	1.16959	0.247566	ENSG00000115507, ENSG00000089116, ENSG00000171791, ENSG00000139874	282	102	16650	2.31539	1	1	0.991488
GOTERM_BP_FAT	GO:0030902~hindbrain development	4	1.16959	0.444036	ENSG00000115507, ENSG00000089116, ENSG00000171791, ENSG00000139874	282	145	16650	1.62876	1	1	0.991488
GOTERM_BP_FAT	GO:0030900~forebrain development	7	2.04678	0.572423	ENSG00000115507, ENSG00000089116, ENSG00000081479, ENSG00000157168, ENSG00000142700, ENSG00000139874, ENSG00000136997	282	361	16650	1.14487	1	1	0.991488
Annotation Cluster 90	Enrichment Score: 0.3929569542502678
Category	Term	Count	%	PValue	Genes	List Total	Pop Hits	Pop Total	Fold Enrichment	Bonferroni	Benjamini	FDR
GOTERM_BP_FAT	GO:0071772~response to BMP	5	1.46199	0.236887	ENSG00000158747, ENSG00000183072, ENSG00000163430, ENSG00000166147, ENSG00000130700	282	147	16650	2.00825	1	1	0.991488
GOTERM_BP_FAT	GO:0071773~cellular response to BMP stimulus	5	1.46199	0.236887	ENSG00000158747, ENSG00000183072, ENSG00000163430, ENSG00000166147, ENSG00000130700	282	147	16650	2.00825	1	1	0.991488
GOTERM_BP_FAT	GO:0007178~transmembrane receptor protein serine/threonine kinase signaling pathway	8	2.33918	0.301777	ENSG00000158747, ENSG00000183072, ENSG00000163430, ENSG00000166147, ENSG00000204435, ENSG00000123999, ENSG00000149599, ENSG00000142611	282	322	16650	1.4669	1	1	0.991488
GOTERM_BP_FAT	GO:0071363~cellular response to growth factor stimulus	13	3.80117	0.337949	ENSG00000158747, ENSG00000112715, ENSG00000130700, ENSG00000104413, ENSG00000136997, ENSG00000185070, ENSG00000183072, ENSG00000163430, ENSG00000166147, ENSG00000149599, ENSG00000142611, ENSG00000169813, ENSG00000180447	282	610	16650	1.25828	1	1	0.991488
GOTERM_BP_FAT	GO:0007167~enzyme linked receptor protein signaling pathway	19	5.55556	0.347473	ENSG00000158747, ENSG00000112715, ENSG00000213024, ENSG00000126561, ENSG00000104413, ENSG00000157168, ENSG00000005882, ENSG00000185070, ENSG00000183072, ENSG00000163430, ENSG00000166147, ENSG00000123999, ENSG00000120899, ENSG00000204435, ENSG00000149599, ENSG00000146674, ENSG00000142611, ENSG00000169418, ENSG00000169813	282	954	16650	1.1759	1	1	0.991488
GOTERM_BP_FAT	GO:0070848~response to growth factor	13	3.80117	0.38436	ENSG00000158747, ENSG00000112715, ENSG00000130700, ENSG00000104413, ENSG00000136997, ENSG00000185070, ENSG00000183072, ENSG00000163430, ENSG00000166147, ENSG00000149599, ENSG00000142611, ENSG00000169813, ENSG00000180447	282	634	16650	1.21065	1	1	0.991488
GOTERM_BP_FAT	GO:0030509~BMP signaling pathway	4	1.16959	0.408202	ENSG00000158747, ENSG00000183072, ENSG00000163430, ENSG00000166147	282	137	16650	1.72387	1	1	0.991488
GOTERM_BP_FAT	GO:0009725~response to hormone	16	4.67836	0.479161	ENSG00000214575, ENSG00000213024, ENSG00000126561, ENSG00000171791, ENSG00000106538, ENSG00000005882, ENSG00000139874, ENSG00000136997, ENSG00000165474, ENSG00000166147, ENSG00000120899, ENSG00000113083, ENSG00000204435, ENSG00000144891, ENSG00000100300, ENSG00000069482	282	854	16650	1.10618	1	1	0.991488
GOTERM_BP_FAT	GO:0009719~response to endogenous stimulus	26	7.60234	0.622574	ENSG00000158747, ENSG00000214575, ENSG00000213024, ENSG00000170175, ENSG00000005882, ENSG00000136997, ENSG00000185070, ENSG00000183072, ENSG00000120899, ENSG00000204435, ENSG00000149599, ENSG00000100300, ENSG00000126561, ENSG00000130700, ENSG00000104413, ENSG00000171791, ENSG00000106538, ENSG00000139874, ENSG00000165474, ENSG00000163430, ENSG00000166147, ENSG00000113083, ENSG00000144891, ENSG0000…	282	1548	16650	0.991671	1	1	0.991488
GOTERM_BP_FAT	GO:0071495~cellular response to endogenous stimulus	19	5.55556	0.713305	ENSG00000158747, ENSG00000214575, ENSG00000213024, ENSG00000126561, ENSG00000130700, ENSG00000104413, ENSG00000106538, ENSG00000005882, ENSG00000139874, ENSG00000136997, ENSG00000185070, ENSG00000183072, ENSG00000163430, ENSG00000166147, ENSG00000204435, ENSG00000149599, ENSG00000144891, ENSG00000142611, ENSG00000169813	282	1185	16650	0.946674	1	1	0.991488
GOTERM_BP_FAT	GO:0032870~cellular response to hormone stimulus	10	2.92398	0.71676	ENSG00000214575, ENSG00000213024, ENSG00000126561, ENSG00000166147, ENSG00000204435, ENSG00000106538, ENSG00000144891, ENSG00000005882, ENSG00000139874, ENSG00000136997	282	616	16650	0.958483	1	1	0.991488
Annotation Cluster 91	Enrichment Score: 0.3877393902705876
Category	Term	Count	%	PValue	Genes	List Total	Pop Hits	Pop Total	Fold Enrichment	Bonferroni	Benjamini	FDR
GOTERM_BP_FAT	GO:0007004~telomere maintenance via telomerase	3	0.877193	0.225084	ENSG00000102977, ENSG00000164362, ENSG00000181085	282	53	16650	3.34203	1	1	0.991488
GOTERM_BP_FAT	GO:0010833~telomere maintenance via telomere lengthening	3	0.877193	0.27518	ENSG00000102977, ENSG00000164362, ENSG00000181085	282	61	16650	2.90373	1	1	0.991488
GOTERM_BP_FAT	GO:0006278~RNA-dependent DNA biosynthetic process	3	0.877193	0.293973	ENSG00000102977, ENSG00000164362, ENSG00000181085	282	64	16650	2.76762	1	1	0.991488
GOTERM_BP_FAT	GO:0060249~anatomical structure homeostasis	7	2.04678	0.547357	ENSG00000112715, ENSG00000102977, ENSG00000171791, ENSG00000120899, ENSG00000164362, ENSG00000181085, ENSG00000162882	282	352	16650	1.17414	1	1	0.991488
GOTERM_BP_FAT	GO:0000723~telomere maintenance	3	0.877193	0.663893	ENSG00000102977, ENSG00000164362, ENSG00000181085	282	134	16650	1.32185	1	1	0.991488
GOTERM_BP_FAT	GO:0032200~telomere organization	3	0.877193	0.712729	ENSG00000102977, ENSG00000164362, ENSG00000181085	282	147	16650	1.20495	1	1	0.991488
Annotation Cluster 92	Enrichment Score: 0.38448787893566627
Category	Term	Count	%	PValue	Genes	List Total	Pop Hits	Pop Total	Fold Enrichment	Bonferroni	Benjamini	FDR
GOTERM_BP_FAT	GO:0051965~positive regulation of synapse assembly	3	0.877193	0.287714	ENSG00000139211, ENSG00000169992, ENSG00000185070	282	63	16650	2.81155	1	1	0.991488
GOTERM_BP_FAT	GO:0050808~synapse organization	6	1.75439	0.351153	ENSG00000139211, ENSG00000099864, ENSG00000169992, ENSG00000170175, ENSG00000157168, ENSG00000185070	282	231	16650	1.53357	1	1	0.991488
GOTERM_BP_FAT	GO:0007416~synapse assembly	4	1.16959	0.376301	ENSG00000139211, ENSG00000169992, ENSG00000157168, ENSG00000185070	282	130	16650	1.81669	1	1	0.991488
GOTERM_BP_FAT	GO:0051963~regulation of synapse assembly	3	0.877193	0.392162	ENSG00000139211, ENSG00000169992, ENSG00000185070	282	80	16650	2.2141	1	1	0.991488
GOTERM_BP_FAT	GO:0050803~regulation of synapse structure or activity	5	1.46199	0.569548	ENSG00000139211, ENSG00000169992, ENSG00000120899, ENSG00000158445, ENSG00000185070	282	237	16650	1.24562	1	1	0.991488
GOTERM_BP_FAT	GO:0050807~regulation of synapse organization	3	0.877193	0.580876	ENSG00000139211, ENSG00000169992, ENSG00000185070	282	115	16650	1.54024	1	1	0.991488
Annotation Cluster 93	Enrichment Score: 0.3781957909080455
Category	Term	Count	%	PValue	Genes	List Total	Pop Hits	Pop Total	Fold Enrichment	Bonferroni	Benjamini	FDR
GOTERM_BP_FAT	GO:0080135~regulation of cellular response to stress	17	4.97076	0.0381359	ENSG00000112715, ENSG00000213024, ENSG00000103490, ENSG00000162607, ENSG00000112559, ENSG00000111247, ENSG00000170485, ENSG00000005339, ENSG00000136997, ENSG00000166313, ENSG00000030066, ENSG00000120899, ENSG00000164362, ENSG00000055332, ENSG00000149599, ENSG00000183765, ENSG00000124795	282	581	16650	1.72758	1	1	0.991488
GOTERM_BP_FAT	GO:0032874~positive regulation of stress-activated MAPK cascade	6	1.75439	0.0866578	ENSG00000112715, ENSG00000103490, ENSG00000120899, ENSG00000055332, ENSG00000112559, ENSG00000149599	282	139	16650	2.5486	1	1	0.991488
GOTERM_BP_FAT	GO:0070304~positive regulation of stress-activated protein kinase signaling cascade	6	1.75439	0.0886986	ENSG00000112715, ENSG00000103490, ENSG00000120899, ENSG00000055332, ENSG00000112559, ENSG00000149599	282	140	16650	2.5304	1	1	0.991488
GOTERM_BP_FAT	GO:0010976~positive regulation of neuron projection development	8	2.33918	0.0939247	ENSG00000112715, ENSG00000166313, ENSG00000213023, ENSG00000099864, ENSG00000120899, ENSG00000157168, ENSG00000167191, ENSG00000124772	282	229	16650	2.06262	1	1	0.991488
GOTERM_BP_FAT	GO:0032872~regulation of stress-activated MAPK cascade	7	2.04678	0.123231	ENSG00000112715, ENSG00000103490, ENSG00000120899, ENSG00000055332, ENSG00000112559, ENSG00000149599, ENSG00000136997	282	200	16650	2.06649	1	1	0.991488
GOTERM_BP_FAT	GO:0002685~regulation of leukocyte migration	6	1.75439	0.124634	ENSG00000158747, ENSG00000112715, ENSG00000103490, ENSG00000120899, ENSG00000106538, ENSG00000159842	282	156	16650	2.27087	1	1	0.991488
GOTERM_BP_FAT	GO:0070302~regulation of stress-activated protein kinase signaling cascade	7	2.04678	0.125522	ENSG00000112715, ENSG00000103490, ENSG00000120899, ENSG00000055332, ENSG00000112559, ENSG00000149599, ENSG00000136997	282	201	16650	2.05621	1	1	0.991488
GOTERM_BP_FAT	GO:0051403~stress-activated MAPK cascade	7	2.04678	0.225875	ENSG00000112715, ENSG00000103490, ENSG00000120899, ENSG00000055332, ENSG00000112559, ENSG00000149599, ENSG00000136997	282	242	16650	1.70784	1	1	0.991488
GOTERM_BP_FAT	GO:0042327~positive regulation of phosphorylation	20	5.84795	0.228366	ENSG00000112715, ENSG00000103490, ENSG00000171791, ENSG00000215788, ENSG00000112559, ENSG00000106538, ENSG00000157168, ENSG00000167191, ENSG00000136997, ENSG00000137312, ENSG00000166444, ENSG00000166147, ENSG00000116670, ENSG00000123999, ENSG00000120899, ENSG00000204435, ENSG00000055332, ENSG00000149599, ENSG00000146674, ENSG00000183765	282	932	16650	1.26701	1	1	0.991488
GOTERM_BP_FAT	GO:0001934~positive regulation of protein phosphorylation	19	5.55556	0.249673	ENSG00000112715, ENSG00000103490, ENSG00000171791, ENSG00000215788, ENSG00000112559, ENSG00000106538, ENSG00000157168, ENSG00000167191, ENSG00000137312, ENSG00000166444, ENSG00000166147, ENSG00000116670, ENSG00000123999, ENSG00000120899, ENSG00000204435, ENSG00000055332, ENSG00000149599, ENSG00000146674, ENSG00000183765	282	890	16650	1.26046	1	1	0.991488
GOTERM_BP_FAT	GO:0031346~positive regulation of cell projection organization	8	2.33918	0.255369	ENSG00000112715, ENSG00000166313, ENSG00000213023, ENSG00000099864, ENSG00000120899, ENSG00000157168, ENSG00000167191, ENSG00000124772	282	304	16650	1.55375	1	1	0.991488
GOTERM_BP_FAT	GO:0031098~stress-activated protein kinase signaling cascade	7	2.04678	0.258912	ENSG00000112715, ENSG00000103490, ENSG00000120899, ENSG00000055332, ENSG00000112559, ENSG00000149599, ENSG00000136997	282	254	16650	1.62716	1	1	0.991488
GOTERM_BP_FAT	GO:0002687~positive regulation of leukocyte migration	4	1.16959	0.279465	ENSG00000112715, ENSG00000103490, ENSG00000120899, ENSG00000106538	282	109	16650	2.1667	1	1	0.991488
GOTERM_BP_FAT	GO:0046330~positive regulation of JNK cascade	4	1.16959	0.325587	ENSG00000103490, ENSG00000120899, ENSG00000112559, ENSG00000149599	282	119	16650	1.98462	1	1	0.991488
GOTERM_BP_FAT	GO:0032147~activation of protein kinase activity	7	2.04678	0.388686	ENSG00000112715, ENSG00000166147, ENSG00000120899, ENSG00000055332, ENSG00000112559, ENSG00000157168, ENSG00000167191	282	298	16650	1.38691	1	1	0.991488
GOTERM_BP_FAT	GO:0043410~positive regulation of MAPK cascade	10	2.92398	0.441939	ENSG00000112715, ENSG00000166444, ENSG00000103490, ENSG00000120899, ENSG00000055332, ENSG00000112559, ENSG00000215788, ENSG00000149599, ENSG00000146674, ENSG00000157168	282	485	16650	1.21737	1	1	0.991488
GOTERM_BP_FAT	GO:0043408~regulation of MAPK cascade	13	3.80117	0.476227	ENSG00000112715, ENSG00000213024, ENSG00000103490, ENSG00000215788, ENSG00000112559, ENSG00000157168, ENSG00000136997, ENSG00000166444, ENSG00000123999, ENSG00000120899, ENSG00000055332, ENSG00000149599, ENSG00000146674	282	678	16650	1.13208	1	1	0.991488
GOTERM_BP_FAT	GO:0046328~regulation of JNK cascade	4	1.16959	0.521194	ENSG00000103490, ENSG00000120899, ENSG00000112559, ENSG00000149599	282	163	16650	1.4489	1	1	0.991488
GOTERM_BP_FAT	GO:0031334~positive regulation of protein complex assembly	5	1.46199	0.522516	ENSG00000112715, ENSG00000183072, ENSG00000103490, ENSG00000120899, ENSG00000162367	282	224	16650	1.31791	1	1	0.991488
GOTERM_BP_FAT	GO:0050731~positive regulation of peptidyl-tyrosine phosphorylation	4	1.16959	0.525312	ENSG00000112715, ENSG00000120899, ENSG00000157168, ENSG00000167191	282	164	16650	1.44006	1	1	0.991488
GOTERM_BP_FAT	GO:0018108~peptidyl-tyrosine phosphorylation	7	2.04678	0.539004	ENSG00000112715, ENSG00000126561, ENSG00000120899, ENSG00000055332, ENSG00000162878, ENSG00000157168, ENSG00000167191	282	349	16650	1.18423	1	1	0.991488
GOTERM_BP_FAT	GO:0046777~protein autophosphorylation	5	1.46199	0.539707	ENSG00000112715, ENSG00000120899, ENSG00000055332, ENSG00000181085, ENSG00000183765	282	228	16650	1.29479	1	1	0.991488
GOTERM_BP_FAT	GO:0018212~peptidyl-tyrosine modification	7	2.04678	0.545731	ENSG00000112715, ENSG00000126561, ENSG00000120899, ENSG00000055332, ENSG00000162878, ENSG00000157168, ENSG00000167191	282	351	16650	1.17749	1	1	0.991488
GOTERM_BP_FAT	GO:0010975~regulation of neuron projection development	8	2.33918	0.548878	ENSG00000112715, ENSG00000166313, ENSG00000213023, ENSG00000099864, ENSG00000120899, ENSG00000157168, ENSG00000167191, ENSG00000124772	282	413	16650	1.14368	1	1	0.991488
GOTERM_BP_FAT	GO:0070374~positive regulation of ERK1 and ERK2 cascade	4	1.16959	0.577006	ENSG00000112715, ENSG00000166444, ENSG00000103490, ENSG00000120899	282	177	16650	1.33429	1	1	0.991488
GOTERM_BP_FAT	GO:0045859~regulation of protein kinase activity	13	3.80117	0.579014	ENSG00000197381, ENSG00000112715, ENSG00000213024, ENSG00000103490, ENSG00000112559, ENSG00000157168, ENSG00000167191, ENSG00000185070, ENSG00000166147, ENSG00000120899, ENSG00000204435, ENSG00000055332, ENSG00000160710	282	730	16650	1.05144	1	1	0.991488
GOTERM_BP_FAT	GO:0007254~JNK cascade	4	1.16959	0.599648	ENSG00000103490, ENSG00000120899, ENSG00000112559, ENSG00000149599	282	183	16650	1.29055	1	1	0.991488
GOTERM_BP_FAT	GO:0051347~positive regulation of transferase activity	11	3.21637	0.643227	ENSG00000112715, ENSG00000166147, ENSG00000102977, ENSG00000120899, ENSG00000055332, ENSG00000112559, ENSG00000181085, ENSG00000157168, ENSG00000167191, ENSG00000136997, ENSG00000127586	282	640	16650	1.01479	1	1	0.991488
GOTERM_BP_FAT	GO:0043405~regulation of MAP kinase activity	6	1.75439	0.649727	ENSG00000112715, ENSG00000213024, ENSG00000120899, ENSG00000055332, ENSG00000112559, ENSG00000157168	282	327	16650	1.08335	1	1	0.991488
GOTERM_BP_FAT	GO:0000165~MAPK cascade	14	4.09357	0.667558	ENSG00000112715, ENSG00000213024, ENSG00000103490, ENSG00000215788, ENSG00000112559, ENSG00000181085, ENSG00000157168, ENSG00000136997, ENSG00000166444, ENSG00000120899, ENSG00000055332, ENSG00000149599, ENSG00000146674, ENSG00000185989	282	841	16650	0.982872	1	1	0.991488
GOTERM_BP_FAT	GO:0043549~regulation of kinase activity	13	3.80117	0.683756	ENSG00000197381, ENSG00000112715, ENSG00000213024, ENSG00000103490, ENSG00000112559, ENSG00000157168, ENSG00000167191, ENSG00000185070, ENSG00000166147, ENSG00000120899, ENSG00000204435, ENSG00000055332, ENSG00000160710	282	788	16650	0.974052	1	1	0.991488
GOTERM_BP_FAT	GO:0050730~regulation of peptidyl-tyrosine phosphorylation	4	1.16959	0.709495	ENSG00000112715, ENSG00000120899, ENSG00000157168, ENSG00000167191	282	216	16650	1.09338	1	1	0.991488
GOTERM_BP_FAT	GO:0043406~positive regulation of MAP kinase activity	4	1.16959	0.712431	ENSG00000112715, ENSG00000120899, ENSG00000112559, ENSG00000157168	282	217	16650	1.08834	1	1	0.991488
GOTERM_BP_FAT	GO:0038127~ERBB signaling pathway	3	0.877193	0.716228	ENSG00000213024, ENSG00000120899, ENSG00000157168	282	148	16650	1.19681	1	1	0.991488
GOTERM_BP_FAT	GO:0023014~signal transduction by protein phosphorylation	14	4.09357	0.724173	ENSG00000112715, ENSG00000213024, ENSG00000103490, ENSG00000215788, ENSG00000112559, ENSG00000181085, ENSG00000157168, ENSG00000136997, ENSG00000166444, ENSG00000120899, ENSG00000055332, ENSG00000149599, ENSG00000146674, ENSG00000185989	282	877	16650	0.942527	1	1	0.991488
GOTERM_BP_FAT	GO:0050900~leukocyte migration	6	1.75439	0.764086	ENSG00000158747, ENSG00000112715, ENSG00000103490, ENSG00000120899, ENSG00000106538, ENSG00000159842	282	376	16650	0.942168	1	1	0.991488
GOTERM_BP_FAT	GO:0043254~regulation of protein complex assembly	6	1.75439	0.773994	ENSG00000112715, ENSG00000183072, ENSG00000103490, ENSG00000120899, ENSG00000055332, ENSG00000162367	282	381	16650	0.929804	1	1	0.991488
GOTERM_BP_FAT	GO:1902533~positive regulation of intracellular signal transduction	14	4.09357	0.776951	ENSG00000112715, ENSG00000213024, ENSG00000103490, ENSG00000171791, ENSG00000215788, ENSG00000112559, ENSG00000157168, ENSG00000167191, ENSG00000003402, ENSG00000166444, ENSG00000120899, ENSG00000055332, ENSG00000149599, ENSG00000146674	282	915	16650	0.903383	1	1	0.991488
GOTERM_BP_FAT	GO:0070371~ERK1 and ERK2 cascade	4	1.16959	0.780959	ENSG00000112715, ENSG00000166444, ENSG00000103490, ENSG00000120899	282	243	16650	0.971894	1	1	0.991488
GOTERM_BP_FAT	GO:0045785~positive regulation of cell adhesion	6	1.75439	0.78169	ENSG00000103241, ENSG00000112715, ENSG00000103490, ENSG00000120899, ENSG00000157168, ENSG00000137312	282	385	16650	0.920144	1	1	0.991488
GOTERM_BP_FAT	GO:0070372~regulation of ERK1 and ERK2 cascade	4	1.16959	0.79472	ENSG00000112715, ENSG00000166444, ENSG00000103490, ENSG00000120899	282	249	16650	0.948475	1	1	0.991488
GOTERM_BP_FAT	GO:0045860~positive regulation of protein kinase activity	7	2.04678	0.808729	ENSG00000112715, ENSG00000166147, ENSG00000120899, ENSG00000055332, ENSG00000112559, ENSG00000157168, ENSG00000167191	282	470	16650	0.879357	1	1	0.991488
GOTERM_BP_FAT	GO:0071900~regulation of protein serine/threonine kinase activity	7	2.04678	0.818088	ENSG00000112715, ENSG00000213024, ENSG00000103490, ENSG00000120899, ENSG00000055332, ENSG00000112559, ENSG00000157168	282	476	16650	0.868273	1	1	0.991488
GOTERM_BP_FAT	GO:0032535~regulation of cellular component size	5	1.46199	0.851639	ENSG00000112715, ENSG00000103490, ENSG00000120899, ENSG00000157168, ENSG00000161798	282	354	16650	0.833934	1	1	0.991488
GOTERM_BP_FAT	GO:0033674~positive regulation of kinase activity	7	2.04678	0.858339	ENSG00000112715, ENSG00000166147, ENSG00000120899, ENSG00000055332, ENSG00000112559, ENSG00000157168, ENSG00000167191	282	505	16650	0.818412	1	1	0.991488
GOTERM_BP_FAT	GO:0071902~positive regulation of protein serine/threonine kinase activity	4	1.16959	0.884892	ENSG00000112715, ENSG00000120899, ENSG00000112559, ENSG00000157168	282	300	16650	0.787234	1	1	0.991488
Annotation Cluster 94	Enrichment Score: 0.3781221210982242
Category	Term	Count	%	PValue	Genes	List Total	Pop Hits	Pop Total	Fold Enrichment	Bonferroni	Benjamini	FDR
GOTERM_BP_FAT	GO:0051047~positive regulation of secretion	11	3.21637	0.0793652	ENSG00000166313, ENSG00000170837, ENSG00000103490, ENSG00000169992, ENSG00000123999, ENSG00000197696, ENSG00000110723, ENSG00000270885, ENSG00000158445, ENSG00000069482, ENSG00000169418	282	355	16650	1.82949	1	1	0.991488
GOTERM_BP_FAT	GO:1903532~positive regulation of secretion by cell	10	2.92398	0.103264	ENSG00000166313, ENSG00000170837, ENSG00000103490, ENSG00000169992, ENSG00000123999, ENSG00000197696, ENSG00000110723, ENSG00000270885, ENSG00000158445, ENSG00000069482	282	327	16650	1.80558	1	1	0.991488
GOTERM_BP_FAT	GO:0050714~positive regulation of protein secretion	5	1.46199	0.49007	ENSG00000166313, ENSG00000170837, ENSG00000103490, ENSG00000169992, ENSG00000110723	282	214	16650	1.3795	1	1	0.991488
GOTERM_BP_FAT	GO:0032880~regulation of protein localization	17	4.97076	0.561061	ENSG00000112715, ENSG00000132326, ENSG00000213024, ENSG00000103490, ENSG00000065882, ENSG00000171791, ENSG00000110723, ENSG00000112559, ENSG00000157168, ENSG00000158445, ENSG00000171700, ENSG00000166313, ENSG00000170837, ENSG00000169992, ENSG00000164362, ENSG00000162878, ENSG00000107201	282	962	16650	1.04337	1	1	0.991488
GOTERM_BP_FAT	GO:0051223~regulation of protein transport	13	3.80117	0.609365	ENSG00000132326, ENSG00000213024, ENSG00000103490, ENSG00000110723, ENSG00000112559, ENSG00000157168, ENSG00000158445, ENSG00000171700, ENSG00000166313, ENSG00000170837, ENSG00000169992, ENSG00000162878, ENSG00000107201	282	746	16650	1.02889	1	1	0.991488
GOTERM_BP_FAT	GO:0070201~regulation of establishment of protein localization	14	4.09357	0.631788	ENSG00000132326, ENSG00000213024, ENSG00000103490, ENSG00000171791, ENSG00000110723, ENSG00000112559, ENSG00000157168, ENSG00000158445, ENSG00000171700, ENSG00000166313, ENSG00000170837, ENSG00000169992, ENSG00000162878, ENSG00000107201	282	820	16650	1.00804	1	1	0.991488
GOTERM_BP_FAT	GO:1904951~positive regulation of establishment of protein localization	9	2.63158	0.648171	ENSG00000166313, ENSG00000170837, ENSG00000103490, ENSG00000169992, ENSG00000171791, ENSG00000110723, ENSG00000157168, ENSG00000158445, ENSG00000107201	282	517	16650	1.02782	1	1	0.991488
GOTERM_BP_FAT	GO:0050708~regulation of protein secretion	7	2.04678	0.65222	ENSG00000166313, ENSG00000132326, ENSG00000170837, ENSG00000103490, ENSG00000169992, ENSG00000110723, ENSG00000158445	282	392	16650	1.05433	1	1	0.991488
GOTERM_BP_FAT	GO:0051222~positive regulation of protein transport	8	2.33918	0.662009	ENSG00000166313, ENSG00000170837, ENSG00000103490, ENSG00000169992, ENSG00000110723, ENSG00000157168, ENSG00000158445, ENSG00000107201	282	460	16650	1.02683	1	1	0.991488
GOTERM_BP_FAT	GO:0009306~protein secretion	8	2.33918	0.68161	ENSG00000166313, ENSG00000132326, ENSG00000170837, ENSG00000103490, ENSG00000169992, ENSG00000110723, ENSG00000158445, ENSG00000069482	282	469	16650	1.00712	1	1	0.991488
Annotation Cluster 95	Enrichment Score: 0.37797855615758175
Category	Term	Count	%	PValue	Genes	List Total	Pop Hits	Pop Total	Fold Enrichment	Bonferroni	Benjamini	FDR
GOTERM_BP_FAT	GO:0032642~regulation of chemokine production	3	0.877193	0.337489	ENSG00000185187, ENSG00000103490, ENSG00000055332	282	71	16650	2.49476	1	1	0.991488
GOTERM_BP_FAT	GO:0051091~positive regulation of sequence-specific DNA binding transcription factor activity	6	1.75439	0.357596	ENSG00000112715, ENSG00000103490, ENSG00000180340, ENSG00000055332, ENSG00000003402, ENSG00000107201	282	233	16650	1.52041	1	1	0.991488
GOTERM_BP_FAT	GO:0032602~chemokine production	3	0.877193	0.368085	ENSG00000185187, ENSG00000103490, ENSG00000055332	282	76	16650	2.33063	1	1	0.991488
GOTERM_BP_FAT	GO:0002831~regulation of response to biotic stimulus	4	1.16959	0.403671	ENSG00000185187, ENSG00000103490, ENSG00000055332, ENSG00000107201	282	136	16650	1.73655	1	1	0.991488
GOTERM_BP_FAT	GO:0050688~regulation of defense response to virus	3	0.877193	0.433256	ENSG00000103490, ENSG00000055332, ENSG00000107201	282	87	16650	2.03595	1	1	0.991488
GOTERM_BP_FAT	GO:0051090~regulation of sequence-specific DNA binding transcription factor activity	8	2.33918	0.440876	ENSG00000112715, ENSG00000116670, ENSG00000185187, ENSG00000103490, ENSG00000180340, ENSG00000055332, ENSG00000003402, ENSG00000107201	282	373	16650	1.26633	1	1	0.991488
GOTERM_BP_FAT	GO:0051092~positive regulation of NF-kappaB transcription factor activity	3	0.877193	0.659873	ENSG00000103490, ENSG00000055332, ENSG00000003402	282	133	16650	1.33179	1	1	0.991488
Annotation Cluster 96	Enrichment Score: 0.3728565312183487
Category	Term	Count	%	PValue	Genes	List Total	Pop Hits	Pop Total	Fold Enrichment	Bonferroni	Benjamini	FDR
GOTERM_BP_FAT	GO:0010827~regulation of glucose transport	5	1.46199	0.0967351	ENSG00000213024, ENSG00000030066, ENSG00000164362, ENSG00000106538, ENSG00000136997	282	103	16650	2.86614	1	1	0.991488
GOTERM_BP_FAT	GO:0031047~gene silencing by RNA	4	1.16959	0.504531	ENSG00000213024, ENSG00000030066, ENSG00000164362, ENSG00000160710	282	159	16650	1.48535	1	1	0.991488
GOTERM_BP_FAT	GO:0016458~gene silencing	4	1.16959	0.80349	ENSG00000213024, ENSG00000030066, ENSG00000164362, ENSG00000160710	282	253	16650	0.933479	1	1	0.991488
GOTERM_BP_FAT	GO:0051168~nuclear export	3	0.877193	0.822472	ENSG00000213024, ENSG00000030066, ENSG00000160710	282	185	16650	0.957447	1	1	0.991488
Annotation Cluster 97	Enrichment Score: 0.37009461679015987
Category	Term	Count	%	PValue	Genes	List Total	Pop Hits	Pop Total	Fold Enrichment	Bonferroni	Benjamini	FDR
GOTERM_BP_FAT	GO:0044344~cellular response to fibroblast growth factor stimulus	4	1.16959	0.376301	ENSG00000104413, ENSG00000136997, ENSG00000169813, ENSG00000185070	282	130	16650	1.81669	1	1	0.991488
GOTERM_BP_FAT	GO:0071774~response to fibroblast growth factor	4	1.16959	0.403671	ENSG00000104413, ENSG00000136997, ENSG00000169813, ENSG00000185070	282	136	16650	1.73655	1	1	0.991488
GOTERM_BP_FAT	GO:0008543~fibroblast growth factor receptor signaling pathway	3	0.877193	0.510684	ENSG00000104413, ENSG00000169813, ENSG00000185070	282	101	16650	1.75374	1	1	0.991488
Annotation Cluster 98	Enrichment Score: 0.36561377792718797
Category	Term	Count	%	PValue	Genes	List Total	Pop Hits	Pop Total	Fold Enrichment	Bonferroni	Benjamini	FDR
GOTERM_BP_FAT	GO:0015909~long-chain fatty acid transport	3	0.877193	0.237572	ENSG00000197696, ENSG00000205560, ENSG00000167525	282	55	16650	3.2205	1	1	0.991488
GOTERM_BP_FAT	GO:0006869~lipid transport	8	2.33918	0.275631	ENSG00000184792, ENSG00000197696, ENSG00000130270, ENSG00000100300, ENSG00000103202, ENSG00000069482, ENSG00000205560, ENSG00000167525	282	312	16650	1.51391	1	1	0.991488
GOTERM_BP_FAT	GO:0010876~lipid localization	8	2.33918	0.356153	ENSG00000184792, ENSG00000197696, ENSG00000130270, ENSG00000100300, ENSG00000103202, ENSG00000069482, ENSG00000205560, ENSG00000167525	282	342	16650	1.38111	1	1	0.991488
GOTERM_BP_FAT	GO:0015718~monocarboxylic acid transport	4	1.16959	0.408202	ENSG00000197696, ENSG00000136997, ENSG00000205560, ENSG00000167525	282	137	16650	1.72387	1	1	0.991488
GOTERM_BP_FAT	GO:0015908~fatty acid transport	3	0.877193	0.415818	ENSG00000197696, ENSG00000205560, ENSG00000167525	282	84	16650	2.10866	1	1	0.991488
GOTERM_BP_FAT	GO:0006820~anion transport	9	2.63158	0.538863	ENSG00000069431, ENSG00000132326, ENSG00000197696, ENSG00000100300, ENSG00000161800, ENSG00000136997, ENSG00000171488, ENSG00000205560, ENSG00000167525	282	468	16650	1.13543	1	1	0.991488
GOTERM_BP_FAT	GO:0046942~carboxylic acid transport	5	1.46199	0.685388	ENSG00000132326, ENSG00000197696, ENSG00000136997, ENSG00000205560, ENSG00000167525	282	275	16650	1.0735	1	1	0.991488
GOTERM_BP_FAT	GO:0015711~organic anion transport	5	1.46199	0.813086	ENSG00000132326, ENSG00000197696, ENSG00000136997, ENSG00000205560, ENSG00000167525	282	331	16650	0.891881	1	1	0.991488
Annotation Cluster 99	Enrichment Score: 0.35668170855581255
Category	Term	Count	%	PValue	Genes	List Total	Pop Hits	Pop Total	Fold Enrichment	Bonferroni	Benjamini	FDR
GOTERM_BP_FAT	GO:1902580~single-organism cellular localization	25	7.30994	0.11684	ENSG00000213023, ENSG00000104863, ENSG00000213024, ENSG00000099864, ENSG00000029534, ENSG00000158445, ENSG00000205560, ENSG00000171700, ENSG00000182481, ENSG00000162878, ENSG00000160710, ENSG00000103241, ENSG00000130545, ENSG00000171791, ENSG00000112559, ENSG00000169371, ENSG00000139973, ENSG00000151025, ENSG00000137312, ENSG00000166126, ENSG00000204267, ENSG00000030066, ENSG00000169992, ENSG0000…	282	1102	16650	1.33944	1	1	0.991488
GOTERM_BP_FAT	GO:0051641~cellular localization	50	14.6199	0.173063	ENSG00000047621, ENSG00000213023, ENSG00000104863, ENSG00000213024, ENSG00000099864, ENSG00000158445, ENSG00000171700, ENSG00000205560, ENSG00000182481, ENSG00000100300, ENSG00000162878, ENSG00000180921, ENSG00000180447, ENSG00000103241, ENSG00000112715, ENSG00000196230, ENSG00000171791, ENSG00000112559, ENSG00000237649, ENSG00000117724, ENSG00000139973, ENSG00000137312, ENSG00000166126, ENSG0000…	282	2541	16650	1.1618	1	1	0.991488
GOTERM_BP_FAT	GO:0051649~establishment of localization in cell	40	11.6959	0.191832	ENSG00000047621, ENSG00000104321, ENSG00000213023, ENSG00000104863, ENSG00000213024, ENSG00000099864, ENSG00000110723, ENSG00000029534, ENSG00000076242, ENSG00000158445, ENSG00000205560, ENSG00000171700, ENSG00000112144, ENSG00000134690, ENSG00000182481, ENSG00000120899, ENSG00000100300, ENSG00000160710, ENSG00000180447, ENSG00000103241, ENSG00000132326, ENSG00000196230, ENSG00000171791, ENSG0000…	282	2004	16650	1.17849	1	1	0.991488
GOTERM_BP_FAT	GO:1902582~single-organism intracellular transport	14	4.09357	0.390598	ENSG00000103241, ENSG00000213024, ENSG00000099864, ENSG00000112559, ENSG00000029534, ENSG00000169371, ENSG00000158445, ENSG00000171700, ENSG00000205560, ENSG00000204267, ENSG00000030066, ENSG00000182481, ENSG00000160710, ENSG00000107201	282	695	16650	1.18935	1	1	0.991488
GOTERM_BP_FAT	GO:0034613~cellular protein localization	29	8.47953	0.449168	ENSG00000104863, ENSG00000213024, ENSG00000099864, ENSG00000110723, ENSG00000044459, ENSG00000029534, ENSG00000158445, ENSG00000171700, ENSG00000182481, ENSG00000100300, ENSG00000162878, ENSG00000160710, ENSG00000180921, ENSG00000112715, ENSG00000130545, ENSG00000171791, ENSG00000065882, ENSG00000112559, ENSG00000157168, ENSG00000169371, ENSG00000151025, ENSG00000137312, ENSG00000166126, ENSG0000…	282	1600	16650	1.07015	1	1	0.991488
GOTERM_BP_FAT	GO:0070727~cellular macromolecule localization	29	8.47953	0.466983	ENSG00000104863, ENSG00000213024, ENSG00000099864, ENSG00000110723, ENSG00000044459, ENSG00000029534, ENSG00000158445, ENSG00000171700, ENSG00000182481, ENSG00000100300, ENSG00000162878, ENSG00000160710, ENSG00000180921, ENSG00000112715, ENSG00000130545, ENSG00000171791, ENSG00000065882, ENSG00000112559, ENSG00000157168, ENSG00000169371, ENSG00000151025, ENSG00000137312, ENSG00000166126, ENSG0000…	282	1613	16650	1.06152	1	1	0.991488
GOTERM_BP_FAT	GO:0008104~protein localization	42	12.2807	0.547478	ENSG00000214357, ENSG00000158747, ENSG00000104863, ENSG00000213024, ENSG00000099864, ENSG00000103490, ENSG00000110723, ENSG00000044459, ENSG00000029534, ENSG00000081479, ENSG00000158445, ENSG00000171700, ENSG00000112144, ENSG00000166313, ENSG00000182481, ENSG00000100300, ENSG00000162878, ENSG00000160710, ENSG00000180921, ENSG00000112715, ENSG00000130545, ENSG00000132326, ENSG00000171791, ENSG0000…	282	2448	16650	1.01298	1	1	0.991488
GOTERM_BP_FAT	GO:0033036~macromolecule localization	48	14.0351	0.559804	ENSG00000214357, ENSG00000158747, ENSG00000104863, ENSG00000213024, ENSG00000099864, ENSG00000103490, ENSG00000197696, ENSG00000110723, ENSG00000130270, ENSG00000044459, ENSG00000029534, ENSG00000081479, ENSG00000158445, ENSG00000205560, ENSG00000171700, ENSG00000112144, ENSG00000166313, ENSG00000182481, ENSG00000100300, ENSG00000162878, ENSG00000160710, ENSG00000180921, ENSG00000167525, ENSG0000…	282	2817	16650	1.00605	1	1	0.991488
GOTERM_BP_FAT	GO:0072594~establishment of protein localization to organelle	12	3.50877	0.572605	ENSG00000213024, ENSG00000182481, ENSG00000102977, ENSG00000171791, ENSG00000164362, ENSG00000112559, ENSG00000100300, ENSG00000169371, ENSG00000157168, ENSG00000160710, ENSG00000171700, ENSG00000107201	282	666	16650	1.06383	1	1	0.991488
GOTERM_BP_FAT	GO:0045184~establishment of protein localization	34	9.94152	0.608528	ENSG00000214357, ENSG00000104863, ENSG00000213024, ENSG00000099864, ENSG00000103490, ENSG00000110723, ENSG00000029534, ENSG00000081479, ENSG00000158445, ENSG00000171700, ENSG00000112144, ENSG00000166313, ENSG00000182481, ENSG00000100300, ENSG00000162878, ENSG00000160710, ENSG00000132326, ENSG00000171791, ENSG00000065882, ENSG00000112559, ENSG00000117724, ENSG00000157168, ENSG00000169371, ENSG0000…	282	2021	16650	0.993294	1	1	0.991488
GOTERM_BP_FAT	GO:0006605~protein targeting	12	3.50877	0.640705	ENSG00000213024, ENSG00000099864, ENSG00000182481, ENSG00000112559, ENSG00000029534, ENSG00000100300, ENSG00000169371, ENSG00000157168, ENSG00000158445, ENSG00000160710, ENSG00000171700, ENSG00000107201	282	701	16650	1.01071	1	1	0.991488
GOTERM_BP_FAT	GO:0006886~intracellular protein transport	16	4.67836	0.745922	ENSG00000213024, ENSG00000099864, ENSG00000065882, ENSG00000110723, ENSG00000112559, ENSG00000029534, ENSG00000157168, ENSG00000169371, ENSG00000158445, ENSG00000171700, ENSG00000204267, ENSG00000182481, ENSG00000102977, ENSG00000100300, ENSG00000160710, ENSG00000107201	282	1020	16650	0.926158	1	1	0.991488
GOTERM_BP_FAT	GO:0015031~protein transport	29	8.47953	0.768041	ENSG00000214357, ENSG00000104863, ENSG00000213024, ENSG00000099864, ENSG00000103490, ENSG00000110723, ENSG00000029534, ENSG00000158445, ENSG00000171700, ENSG00000112144, ENSG00000166313, ENSG00000182481, ENSG00000100300, ENSG00000162878, ENSG00000160710, ENSG00000132326, ENSG00000065882, ENSG00000112559, ENSG00000117724, ENSG00000157168, ENSG00000169371, ENSG00000166126, ENSG00000170837, ENSG0000…	282	1860	16650	0.920556	1	1	0.991488
GOTERM_BP_FAT	GO:0046907~intracellular transport	24	7.01754	0.814753	ENSG00000047621, ENSG00000103241, ENSG00000213024, ENSG00000196230, ENSG00000099864, ENSG00000065882, ENSG00000110723, ENSG00000112559, ENSG00000029534, ENSG00000157168, ENSG00000169371, ENSG00000158445, ENSG00000066735, ENSG00000171700, ENSG00000205560, ENSG00000140350, ENSG00000204267, ENSG00000030066, ENSG00000182481, ENSG00000102977, ENSG00000100300, ENSG00000160710, ENSG00000180447, ENSG0000…	282	1594	16650	0.888972	1	1	0.991488
Annotation Cluster 100	Enrichment Score: 0.35474531503711976
Category	Term	Count	%	PValue	Genes	List Total	Pop Hits	Pop Total	Fold Enrichment	Bonferroni	Benjamini	FDR
GOTERM_BP_FAT	GO:0009411~response to UV	5	1.46199	0.170847	ENSG00000171791, ENSG00000162607, ENSG00000166803, ENSG00000005339, ENSG00000136997	282	128	16650	2.30635	1	1	0.991488
GOTERM_BP_FAT	GO:0009416~response to light stimulus	5	1.46199	0.70937	ENSG00000171791, ENSG00000162607, ENSG00000166803, ENSG00000005339, ENSG00000136997	282	284	16650	1.03948	1	1	0.991488
GOTERM_BP_FAT	GO:0009314~response to radiation	7	2.04678	0.711679	ENSG00000171791, ENSG00000162607, ENSG00000166803, ENSG00000111247, ENSG00000005339, ENSG00000183765, ENSG00000136997	282	418	16650	0.988751	1	1	0.991488
Annotation Cluster 101	Enrichment Score: 0.35427157741656023
Category	Term	Count	%	PValue	Genes	List Total	Pop Hits	Pop Total	Fold Enrichment	Bonferroni	Benjamini	FDR
GOTERM_BP_FAT	GO:0032872~regulation of stress-activated MAPK cascade	7	2.04678	0.123231	ENSG00000112715, ENSG00000103490, ENSG00000120899, ENSG00000055332, ENSG00000112559, ENSG00000149599, ENSG00000136997	282	200	16650	2.06649	1	1	0.991488
GOTERM_BP_FAT	GO:0070302~regulation of stress-activated protein kinase signaling cascade	7	2.04678	0.125522	ENSG00000112715, ENSG00000103490, ENSG00000120899, ENSG00000055332, ENSG00000112559, ENSG00000149599, ENSG00000136997	282	201	16650	2.05621	1	1	0.991488
GOTERM_BP_FAT	GO:0051403~stress-activated MAPK cascade	7	2.04678	0.225875	ENSG00000112715, ENSG00000103490, ENSG00000120899, ENSG00000055332, ENSG00000112559, ENSG00000149599, ENSG00000136997	282	242	16650	1.70784	1	1	0.991488
GOTERM_BP_FAT	GO:0031098~stress-activated protein kinase signaling cascade	7	2.04678	0.258912	ENSG00000112715, ENSG00000103490, ENSG00000120899, ENSG00000055332, ENSG00000112559, ENSG00000149599, ENSG00000136997	282	254	16650	1.62716	1	1	0.991488
GOTERM_BP_FAT	GO:0043281~regulation of cysteine-type endopeptidase activity involved in apoptotic process	3	0.877193	0.854304	ENSG00000112715, ENSG00000103490, ENSG00000136997	282	200	16650	0.885638	1	1	0.991488
GOTERM_BP_FAT	GO:2000116~regulation of cysteine-type endopeptidase activity	3	0.877193	0.894575	ENSG00000112715, ENSG00000103490, ENSG00000136997	282	224	16650	0.790748	1	1	0.991488
GOTERM_BP_FAT	GO:0030162~regulation of proteolysis	8	2.33918	0.957415	ENSG00000134758, ENSG00000112715, ENSG00000103490, ENSG00000186088, ENSG00000120899, ENSG00000133265, ENSG00000136997, ENSG00000180447	282	708	16650	0.667147	1	1	0.991488
GOTERM_BP_FAT	GO:0052548~regulation of endopeptidase activity	3	0.877193	0.987532	ENSG00000112715, ENSG00000103490, ENSG00000136997	282	372	16650	0.47615	1	1	0.991488
GOTERM_BP_FAT	GO:0052547~regulation of peptidase activity	3	0.877193	0.991323	ENSG00000112715, ENSG00000103490, ENSG00000136997	282	396	16650	0.447292	1	1	0.991488
Annotation Cluster 102	Enrichment Score: 0.3513169652542105
Category	Term	Count	%	PValue	Genes	List Total	Pop Hits	Pop Total	Fold Enrichment	Bonferroni	Benjamini	FDR
GOTERM_BP_FAT	GO:0016049~cell growth	11	3.21637	0.2061	ENSG00000123737, ENSG00000112715, ENSG00000166313, ENSG00000213023, ENSG00000171791, ENSG00000120899, ENSG00000157168, ENSG00000069482, ENSG00000169418, ENSG00000066735, ENSG00000124772	282	436	16650	1.48961	1	1	0.991488
GOTERM_BP_FAT	GO:0030308~negative regulation of cell growth	4	1.16959	0.553786	ENSG00000166313, ENSG00000171791, ENSG00000069482, ENSG00000169418	282	171	16650	1.38111	1	1	0.991488
GOTERM_BP_FAT	GO:0045926~negative regulation of growth	4	1.16959	0.773799	ENSG00000166313, ENSG00000171791, ENSG00000069482, ENSG00000169418	282	240	16650	0.984043	1	1	0.991488
Annotation Cluster 103	Enrichment Score: 0.347103460868285
Category	Term	Count	%	PValue	Genes	List Total	Pop Hits	Pop Total	Fold Enrichment	Bonferroni	Benjamini	FDR
GOTERM_BP_FAT	GO:0032330~regulation of chondrocyte differentiation	3	0.877193	0.181914	ENSG00000005073, ENSG00000109705, ENSG00000162878	282	46	16650	3.8506	1	1	0.991488
GOTERM_BP_FAT	GO:0061035~regulation of cartilage development	3	0.877193	0.293973	ENSG00000005073, ENSG00000109705, ENSG00000162878	282	64	16650	2.76762	1	1	0.991488
GOTERM_BP_FAT	GO:0002062~chondrocyte differentiation	3	0.877193	0.461684	ENSG00000005073, ENSG00000109705, ENSG00000162878	282	92	16650	1.9253	1	1	0.991488
GOTERM_BP_FAT	GO:0051216~cartilage development	3	0.877193	0.817787	ENSG00000005073, ENSG00000109705, ENSG00000162878	282	183	16650	0.967911	1	1	0.991488
GOTERM_BP_FAT	GO:0061448~connective tissue development	3	0.877193	0.910591	ENSG00000005073, ENSG00000109705, ENSG00000162878	282	236	16650	0.750541	1	1	0.991488
Annotation Cluster 104	Enrichment Score: 0.3436792509239664
Category	Term	Count	%	PValue	Genes	List Total	Pop Hits	Pop Total	Fold Enrichment	Bonferroni	Benjamini	FDR
GOTERM_BP_FAT	GO:0006220~pyrimidine nucleotide metabolic process	4	1.16959	0.0471498	ENSG00000103202, ENSG00000154027, ENSG00000140398, ENSG00000128951	282	48	16650	4.92021	1	1	0.991488
GOTERM_BP_FAT	GO:0006221~pyrimidine nucleotide biosynthetic process	3	0.877193	0.106568	ENSG00000103202, ENSG00000154027, ENSG00000128951	282	33	16650	5.3675	1	1	0.991488
GOTERM_BP_FAT	GO:0072527~pyrimidine-containing compound metabolic process	4	1.16959	0.160978	ENSG00000103202, ENSG00000154027, ENSG00000140398, ENSG00000128951	282	82	16650	2.88012	1	1	0.991488
GOTERM_BP_FAT	GO:0072528~pyrimidine-containing compound biosynthetic process	3	0.877193	0.16382	ENSG00000103202, ENSG00000154027, ENSG00000128951	282	43	16650	4.11925	1	1	0.991488
GOTERM_BP_FAT	GO:1903578~regulation of ATP metabolic process	3	0.877193	0.212649	ENSG00000125648, ENSG00000100300, ENSG00000136997	282	51	16650	3.47309	1	1	0.991488
GOTERM_BP_FAT	GO:0009118~regulation of nucleoside metabolic process	3	0.877193	0.212649	ENSG00000125648, ENSG00000100300, ENSG00000136997	282	51	16650	3.47309	1	1	0.991488
GOTERM_BP_FAT	GO:0006164~purine nucleotide biosynthetic process	7	2.04678	0.253619	ENSG00000099864, ENSG00000120899, ENSG00000103202, ENSG00000136997, ENSG00000169418, ENSG00000154027, ENSG00000152402	282	252	16650	1.64007	1	1	0.991488
GOTERM_BP_FAT	GO:0072522~purine-containing compound biosynthetic process	7	2.04678	0.285985	ENSG00000099864, ENSG00000120899, ENSG00000103202, ENSG00000136997, ENSG00000169418, ENSG00000154027, ENSG00000152402	282	263	16650	1.57147	1	1	0.991488
GOTERM_BP_FAT	GO:0009163~nucleoside biosynthetic process	4	1.16959	0.371713	ENSG00000103202, ENSG00000136997, ENSG00000154027, ENSG00000128951	282	129	16650	1.83078	1	1	0.991488
GOTERM_BP_FAT	GO:1901659~glycosyl compound biosynthetic process	4	1.16959	0.380883	ENSG00000103202, ENSG00000136997, ENSG00000154027, ENSG00000128951	282	131	16650	1.80283	1	1	0.991488
GOTERM_BP_FAT	GO:0009142~nucleoside triphosphate biosynthetic process	3	0.877193	0.392162	ENSG00000103202, ENSG00000136997, ENSG00000154027	282	80	16650	2.2141	1	1	0.991488
GOTERM_BP_FAT	GO:0009152~purine ribonucleotide biosynthetic process	6	1.75439	0.397856	ENSG00000099864, ENSG00000103202, ENSG00000136997, ENSG00000169418, ENSG00000154027, ENSG00000152402	282	245	16650	1.44594	1	1	0.991488
GOTERM_BP_FAT	GO:0006165~nucleoside diphosphate phosphorylation	3	0.877193	0.415818	ENSG00000103202, ENSG00000136997, ENSG00000154027	282	84	16650	2.10866	1	1	0.991488
GOTERM_BP_FAT	GO:0009260~ribonucleotide biosynthetic process	6	1.75439	0.438832	ENSG00000099864, ENSG00000103202, ENSG00000136997, ENSG00000169418, ENSG00000154027, ENSG00000152402	282	258	16650	1.37308	1	1	0.991488
GOTERM_BP_FAT	GO:0006163~purine nucleotide metabolic process	11	3.21637	0.443647	ENSG00000112715, ENSG00000125648, ENSG00000099864, ENSG00000180340, ENSG00000120899, ENSG00000100300, ENSG00000103202, ENSG00000136997, ENSG00000169418, ENSG00000154027, ENSG00000152402	282	547	16650	1.18733	1	1	0.991488
GOTERM_BP_FAT	GO:0046939~nucleotide phosphorylation	3	0.877193	0.450411	ENSG00000103202, ENSG00000136997, ENSG00000154027	282	90	16650	1.96809	1	1	0.991488
GOTERM_BP_FAT	GO:0046390~ribose phosphate biosynthetic process	6	1.75439	0.451179	ENSG00000099864, ENSG00000103202, ENSG00000136997, ENSG00000169418, ENSG00000154027, ENSG00000152402	282	261	16650	1.3573	1	1	0.991488
GOTERM_BP_FAT	GO:0009124~nucleoside monophosphate biosynthetic process	3	0.877193	0.489265	ENSG00000136997, ENSG00000154027, ENSG00000128951	282	97	16650	1.82606	1	1	0.991488
GOTERM_BP_FAT	GO:0072521~purine-containing compound metabolic process	11	3.21637	0.495307	ENSG00000112715, ENSG00000125648, ENSG00000099864, ENSG00000180340, ENSG00000120899, ENSG00000100300, ENSG00000103202, ENSG00000136997, ENSG00000169418, ENSG00000154027, ENSG00000152402	282	575	16650	1.12951	1	1	0.991488
GOTERM_BP_FAT	GO:0042451~purine nucleoside biosynthetic process	3	0.877193	0.505385	ENSG00000103202, ENSG00000136997, ENSG00000154027	282	100	16650	1.77128	1	1	0.991488
GOTERM_BP_FAT	GO:0046129~purine ribonucleoside biosynthetic process	3	0.877193	0.505385	ENSG00000103202, ENSG00000136997, ENSG00000154027	282	100	16650	1.77128	1	1	0.991488
GOTERM_BP_FAT	GO:0009150~purine ribonucleotide metabolic process	10	2.92398	0.518944	ENSG00000125648, ENSG00000099864, ENSG00000180340, ENSG00000120899, ENSG00000100300, ENSG00000103202, ENSG00000136997, ENSG00000169418, ENSG00000154027, ENSG00000152402	282	520	16650	1.13543	1	1	0.991488
GOTERM_BP_FAT	GO:0009259~ribonucleotide metabolic process	10	2.92398	0.551525	ENSG00000125648, ENSG00000099864, ENSG00000180340, ENSG00000120899, ENSG00000100300, ENSG00000103202, ENSG00000136997, ENSG00000169418, ENSG00000154027, ENSG00000152402	282	535	16650	1.1036	1	1	0.991488
GOTERM_BP_FAT	GO:0009141~nucleoside triphosphate metabolic process	6	1.75439	0.564778	ENSG00000125648, ENSG00000100300, ENSG00000103202, ENSG00000136997, ENSG00000154027, ENSG00000128951	282	297	16650	1.19278	1	1	0.991488
GOTERM_BP_FAT	GO:0009132~nucleoside diphosphate metabolic process	3	0.877193	0.566475	ENSG00000103202, ENSG00000136997, ENSG00000154027	282	112	16650	1.5815	1	1	0.991488
GOTERM_BP_FAT	GO:0019693~ribose phosphate metabolic process	10	2.92398	0.582839	ENSG00000125648, ENSG00000099864, ENSG00000180340, ENSG00000120899, ENSG00000100300, ENSG00000103202, ENSG00000136997, ENSG00000169418, ENSG00000154027, ENSG00000152402	282	549	16650	1.07546	1	1	0.991488
GOTERM_BP_FAT	GO:0042455~ribonucleoside biosynthetic process	3	0.877193	0.599529	ENSG00000103202, ENSG00000136997, ENSG00000154027	282	119	16650	1.48847	1	1	0.991488
GOTERM_BP_FAT	GO:0009205~purine ribonucleoside triphosphate metabolic process	5	1.46199	0.662938	ENSG00000125648, ENSG00000100300, ENSG00000103202, ENSG00000136997, ENSG00000154027	282	267	16650	1.10567	1	1	0.991488
GOTERM_BP_FAT	GO:0009199~ribonucleoside triphosphate metabolic process	5	1.46199	0.679876	ENSG00000125648, ENSG00000100300, ENSG00000103202, ENSG00000136997, ENSG00000154027	282	273	16650	1.08137	1	1	0.991488
GOTERM_BP_FAT	GO:0009144~purine nucleoside triphosphate metabolic process	5	1.46199	0.68264	ENSG00000125648, ENSG00000100300, ENSG00000103202, ENSG00000136997, ENSG00000154027	282	274	16650	1.07742	1	1	0.991488
GOTERM_BP_FAT	GO:0009123~nucleoside monophosphate metabolic process	5	1.46199	0.773259	ENSG00000125648, ENSG00000100300, ENSG00000136997, ENSG00000154027, ENSG00000128951	282	311	16650	0.949237	1	1	0.991488
GOTERM_BP_FAT	GO:0046034~ATP metabolic process	4	1.16959	0.780959	ENSG00000125648, ENSG00000100300, ENSG00000136997, ENSG00000154027	282	243	16650	0.971894	1	1	0.991488
GOTERM_BP_FAT	GO:0009116~nucleoside metabolic process	6	1.75439	0.830018	ENSG00000125648, ENSG00000100300, ENSG00000103202, ENSG00000136997, ENSG00000154027, ENSG00000128951	282	413	16650	0.857761	1	1	0.991488
GOTERM_BP_FAT	GO:0046128~purine ribonucleoside metabolic process	5	1.46199	0.854651	ENSG00000125648, ENSG00000100300, ENSG00000103202, ENSG00000136997, ENSG00000154027	282	356	16650	0.829249	1	1	0.991488
GOTERM_BP_FAT	GO:0042278~purine nucleoside metabolic process	5	1.46199	0.859072	ENSG00000125648, ENSG00000100300, ENSG00000103202, ENSG00000136997, ENSG00000154027	282	359	16650	0.82232	1	1	0.991488
GOTERM_BP_FAT	GO:1901657~glycosyl compound metabolic process	6	1.75439	0.861597	ENSG00000125648, ENSG00000100300, ENSG00000103202, ENSG00000136997, ENSG00000154027, ENSG00000128951	282	435	16650	0.81438	1	1	0.991488
GOTERM_BP_FAT	GO:0009167~purine ribonucleoside monophosphate metabolic process	4	1.16959	0.862905	ENSG00000125648, ENSG00000100300, ENSG00000136997, ENSG00000154027	282	285	16650	0.828667	1	1	0.991488
GOTERM_BP_FAT	GO:0009126~purine nucleoside monophosphate metabolic process	4	1.16959	0.864478	ENSG00000125648, ENSG00000100300, ENSG00000136997, ENSG00000154027	282	286	16650	0.82577	1	1	0.991488
GOTERM_BP_FAT	GO:0009161~ribonucleoside monophosphate metabolic process	4	1.16959	0.880763	ENSG00000125648, ENSG00000100300, ENSG00000136997, ENSG00000154027	282	297	16650	0.795186	1	1	0.991488
GOTERM_BP_FAT	GO:0009119~ribonucleoside metabolic process	5	1.46199	0.892804	ENSG00000125648, ENSG00000100300, ENSG00000103202, ENSG00000136997, ENSG00000154027	282	385	16650	0.766786	1	1	0.991488
Annotation Cluster 105	Enrichment Score: 0.34084503907127633
Category	Term	Count	%	PValue	Genes	List Total	Pop Hits	Pop Total	Fold Enrichment	Bonferroni	Benjamini	FDR
GOTERM_BP_FAT	GO:0002685~regulation of leukocyte migration	6	1.75439	0.124634	ENSG00000158747, ENSG00000112715, ENSG00000103490, ENSG00000120899, ENSG00000106538, ENSG00000159842	282	156	16650	2.27087	1	1	0.991488
GOTERM_BP_FAT	GO:0002688~regulation of leukocyte chemotaxis	4	1.16959	0.238555	ENSG00000158747, ENSG00000112715, ENSG00000120899, ENSG00000106538	282	100	16650	2.3617	1	1	0.991488
GOTERM_BP_FAT	GO:0002687~positive regulation of leukocyte migration	4	1.16959	0.279465	ENSG00000112715, ENSG00000103490, ENSG00000120899, ENSG00000106538	282	109	16650	2.1667	1	1	0.991488
GOTERM_BP_FAT	GO:0045807~positive regulation of endocytosis	4	1.16959	0.297869	ENSG00000112715, ENSG00000103490, ENSG00000159842, ENSG00000137312	282	113	16650	2.09	1	1	0.991488
GOTERM_BP_FAT	GO:0002690~positive regulation of leukocyte chemotaxis	3	0.877193	0.404046	ENSG00000112715, ENSG00000120899, ENSG00000106538	282	82	16650	2.16009	1	1	0.991488
GOTERM_BP_FAT	GO:0050921~positive regulation of chemotaxis	3	0.877193	0.608619	ENSG00000112715, ENSG00000120899, ENSG00000106538	282	121	16650	1.46386	1	1	0.991488
GOTERM_BP_FAT	GO:0050920~regulation of chemotaxis	4	1.16959	0.610668	ENSG00000158747, ENSG00000112715, ENSG00000120899, ENSG00000106538	282	186	16650	1.26973	1	1	0.991488
GOTERM_BP_FAT	GO:0060326~cell chemotaxis	5	1.46199	0.614886	ENSG00000158747, ENSG00000112715, ENSG00000120899, ENSG00000106538, ENSG00000144891	282	251	16650	1.17615	1	1	0.991488
GOTERM_BP_FAT	GO:0030595~leukocyte chemotaxis	4	1.16959	0.639055	ENSG00000158747, ENSG00000112715, ENSG00000120899, ENSG00000106538	282	194	16650	1.21737	1	1	0.991488
GOTERM_BP_FAT	GO:0032103~positive regulation of response to external stimulus	5	1.46199	0.662938	ENSG00000112715, ENSG00000120899, ENSG00000106538, ENSG00000144891, ENSG00000167191	282	267	16650	1.10567	1	1	0.991488
GOTERM_BP_FAT	GO:0030100~regulation of endocytosis	4	1.16959	0.665967	ENSG00000112715, ENSG00000103490, ENSG00000159842, ENSG00000137312	282	202	16650	1.16916	1	1	0.991488
GOTERM_BP_FAT	GO:0097529~myeloid leukocyte migration	3	0.877193	0.75241	ENSG00000158747, ENSG00000112715, ENSG00000106538	282	159	16650	1.11401	1	1	0.991488
GOTERM_BP_FAT	GO:0050900~leukocyte migration	6	1.75439	0.764086	ENSG00000158747, ENSG00000112715, ENSG00000103490, ENSG00000120899, ENSG00000106538, ENSG00000159842	282	376	16650	0.942168	1	1	0.991488
Annotation Cluster 106	Enrichment Score: 0.3322296689978889
Category	Term	Count	%	PValue	Genes	List Total	Pop Hits	Pop Total	Fold Enrichment	Bonferroni	Benjamini	FDR
GOTERM_BP_FAT	GO:0031214~biomineral tissue development	4	1.16959	0.394582	ENSG00000120899, ENSG00000162878, ENSG00000064932, ENSG00000180921	282	134	16650	1.76246	1	1	0.991488
GOTERM_BP_FAT	GO:0030282~bone mineralization	3	0.877193	0.450411	ENSG00000120899, ENSG00000162878, ENSG00000064932	282	90	16650	1.96809	1	1	0.991488
GOTERM_BP_FAT	GO:0001503~ossification	7	2.04678	0.566976	ENSG00000107821, ENSG00000171791, ENSG00000120899, ENSG00000146674, ENSG00000162878, ENSG00000160710, ENSG00000064932	282	359	16650	1.15125	1	1	0.991488
Annotation Cluster 107	Enrichment Score: 0.3113002520780851
Category	Term	Count	%	PValue	Genes	List Total	Pop Hits	Pop Total	Fold Enrichment	Bonferroni	Benjamini	FDR
GOTERM_BP_FAT	GO:0043534~blood vessel endothelial cell migration	4	1.16959	0.111016	ENSG00000112715, ENSG00000126561, ENSG00000204435, ENSG00000120899	282	69	16650	3.42276	1	1	0.991488
GOTERM_BP_FAT	GO:0043535~regulation of blood vessel endothelial cell migration	3	0.877193	0.218859	ENSG00000112715, ENSG00000126561, ENSG00000204435	282	52	16650	3.4063	1	1	0.991488
GOTERM_BP_FAT	GO:0010594~regulation of endothelial cell migration	4	1.16959	0.307099	ENSG00000112715, ENSG00000126561, ENSG00000204435, ENSG00000120899	282	115	16650	2.05365	1	1	0.991488
GOTERM_BP_FAT	GO:0010595~positive regulation of endothelial cell migration	3	0.877193	0.318917	ENSG00000112715, ENSG00000126561, ENSG00000120899	282	68	16650	2.60482	1	1	0.991488
GOTERM_BP_FAT	GO:0043542~endothelial cell migration	4	1.16959	0.483294	ENSG00000112715, ENSG00000126561, ENSG00000204435, ENSG00000120899	282	154	16650	1.53357	1	1	0.991488
GOTERM_BP_FAT	GO:0010634~positive regulation of epithelial cell migration	3	0.877193	0.531508	ENSG00000112715, ENSG00000126561, ENSG00000120899	282	105	16650	1.68693	1	1	0.991488
GOTERM_BP_FAT	GO:0018108~peptidyl-tyrosine phosphorylation	7	2.04678	0.539004	ENSG00000112715, ENSG00000126561, ENSG00000120899, ENSG00000055332, ENSG00000162878, ENSG00000157168, ENSG00000167191	282	349	16650	1.18423	1	1	0.991488
GOTERM_BP_FAT	GO:0018212~peptidyl-tyrosine modification	7	2.04678	0.545731	ENSG00000112715, ENSG00000126561, ENSG00000120899, ENSG00000055332, ENSG00000162878, ENSG00000157168, ENSG00000167191	282	351	16650	1.17749	1	1	0.991488
GOTERM_BP_FAT	GO:0010632~regulation of epithelial cell migration	4	1.16959	0.545791	ENSG00000112715, ENSG00000126561, ENSG00000204435, ENSG00000120899	282	169	16650	1.39746	1	1	0.991488
GOTERM_BP_FAT	GO:0007259~JAK-STAT cascade	4	1.16959	0.553786	ENSG00000112715, ENSG00000126561, ENSG00000120899, ENSG00000185070	282	171	16650	1.38111	1	1	0.991488
GOTERM_BP_FAT	GO:0090130~tissue migration	5	1.46199	0.569548	ENSG00000103241, ENSG00000112715, ENSG00000126561, ENSG00000204435, ENSG00000120899	282	237	16650	1.24562	1	1	0.991488
GOTERM_BP_FAT	GO:0097696~STAT cascade	4	1.16959	0.573347	ENSG00000112715, ENSG00000126561, ENSG00000120899, ENSG00000185070	282	176	16650	1.34188	1	1	0.991488
GOTERM_BP_FAT	GO:0001667~ameboidal-type cell migration	6	1.75439	0.630861	ENSG00000112715, ENSG00000126561, ENSG00000204435, ENSG00000120899, ENSG00000079308, ENSG00000166823	282	320	16650	1.10705	1	1	0.991488
GOTERM_BP_FAT	GO:0046425~regulation of JAK-STAT cascade	3	0.877193	0.719692	ENSG00000112715, ENSG00000120899, ENSG00000185070	282	149	16650	1.18878	1	1	0.991488
GOTERM_BP_FAT	GO:1904892~regulation of STAT cascade	3	0.877193	0.719692	ENSG00000112715, ENSG00000120899, ENSG00000185070	282	149	16650	1.18878	1	1	0.991488
GOTERM_BP_FAT	GO:0010631~epithelial cell migration	4	1.16959	0.743238	ENSG00000112715, ENSG00000126561, ENSG00000204435, ENSG00000120899	282	228	16650	1.03583	1	1	0.991488
GOTERM_BP_FAT	GO:0090132~epithelium migration	4	1.16959	0.751172	ENSG00000112715, ENSG00000126561, ENSG00000204435, ENSG00000120899	282	231	16650	1.02238	1	1	0.991488
GOTERM_BP_FAT	GO:0007169~transmembrane receptor protein tyrosine kinase signaling pathway	10	2.92398	0.769812	ENSG00000112715, ENSG00000213024, ENSG00000126561, ENSG00000104413, ENSG00000120899, ENSG00000146674, ENSG00000157168, ENSG00000005882, ENSG00000169813, ENSG00000185070	282	648	16650	0.911151	1	1	0.991488
Annotation Cluster 108	Enrichment Score: 0.30755622635997787
Category	Term	Count	%	PValue	Genes	List Total	Pop Hits	Pop Total	Fold Enrichment	Bonferroni	Benjamini	FDR
GOTERM_BP_FAT	GO:0006476~protein deacetylation	3	0.877193	0.472822	ENSG00000112715, ENSG00000132326, ENSG00000136098	282	94	16650	1.88434	1	1	0.991488
GOTERM_BP_FAT	GO:0035601~protein deacylation	3	0.877193	0.500048	ENSG00000112715, ENSG00000132326, ENSG00000136098	282	99	16650	1.78917	1	1	0.991488
GOTERM_BP_FAT	GO:0098732~macromolecule deacylation	3	0.877193	0.505385	ENSG00000112715, ENSG00000132326, ENSG00000136098	282	100	16650	1.77128	1	1	0.991488
Annotation Cluster 109	Enrichment Score: 0.30685351151573076
Category	Term	Count	%	PValue	Genes	List Total	Pop Hits	Pop Total	Fold Enrichment	Bonferroni	Benjamini	FDR
GOTERM_BP_FAT	GO:0006813~potassium ion transport	7	2.04678	0.149978	ENSG00000069431, ENSG00000120899, ENSG00000135740, ENSG00000158445, ENSG00000069482, ENSG00000124134, ENSG00000170049	282	212	16650	1.94952	1	1	0.991488
GOTERM_BP_FAT	GO:0071804~cellular potassium ion transport	6	1.75439	0.195193	ENSG00000069431, ENSG00000135740, ENSG00000158445, ENSG00000069482, ENSG00000124134, ENSG00000170049	282	182	16650	1.94646	1	1	0.991488
GOTERM_BP_FAT	GO:0071805~potassium ion transmembrane transport	6	1.75439	0.195193	ENSG00000069431, ENSG00000135740, ENSG00000158445, ENSG00000069482, ENSG00000124134, ENSG00000170049	282	182	16650	1.94646	1	1	0.991488
GOTERM_BP_FAT	GO:0006811~ion transport	26	7.60234	0.497699	ENSG00000069431, ENSG00000104321, ENSG00000176273, ENSG00000197696, ENSG00000135740, ENSG00000170175, ENSG00000158445, ENSG00000136997, ENSG00000171488, ENSG00000073150, ENSG00000205560, ENSG00000183072, ENSG00000125648, ENSG00000120899, ENSG00000100300, ENSG00000161800, ENSG00000124134, ENSG00000167525, ENSG00000132326, ENSG00000171791, ENSG00000170049, ENSG00000147804, ENSG00000169992, ENSG0000…	282	1458	16650	1.05289	1	1	0.991488
GOTERM_BP_FAT	GO:0030001~metal ion transport	15	4.38596	0.508745	ENSG00000069431, ENSG00000104321, ENSG00000176273, ENSG00000171791, ENSG00000135740, ENSG00000158445, ENSG00000170049, ENSG00000147804, ENSG00000183072, ENSG00000125648, ENSG00000120899, ENSG00000100300, ENSG00000069482, ENSG00000185989, ENSG00000124134	282	814	16650	1.08801	1	1	0.991488
GOTERM_BP_FAT	GO:0034220~ion transmembrane transport	17	4.97076	0.56277	ENSG00000069431, ENSG00000104321, ENSG00000135740, ENSG00000170175, ENSG00000158445, ENSG00000136997, ENSG00000171488, ENSG00000205560, ENSG00000170049, ENSG00000147804, ENSG00000125648, ENSG00000120899, ENSG00000169992, ENSG00000069482, ENSG00000185989, ENSG00000161798, ENSG00000124134	282	963	16650	1.04229	1	1	0.991488
GOTERM_BP_FAT	GO:0098662~inorganic cation transmembrane transport	11	3.21637	0.633457	ENSG00000069431, ENSG00000104321, ENSG00000147804, ENSG00000125648, ENSG00000120899, ENSG00000135740, ENSG00000158445, ENSG00000069482, ENSG00000185989, ENSG00000124134, ENSG00000170049	282	635	16650	1.02278	1	1	0.991488
GOTERM_BP_FAT	GO:0098655~cation transmembrane transport	12	3.50877	0.644422	ENSG00000069431, ENSG00000104321, ENSG00000147804, ENSG00000125648, ENSG00000120899, ENSG00000135740, ENSG00000170175, ENSG00000158445, ENSG00000069482, ENSG00000185989, ENSG00000124134, ENSG00000170049	282	703	16650	1.00784	1	1	0.991488
GOTERM_BP_FAT	GO:0006812~cation transport	16	4.67836	0.681869	ENSG00000069431, ENSG00000104321, ENSG00000176273, ENSG00000171791, ENSG00000135740, ENSG00000170175, ENSG00000158445, ENSG00000170049, ENSG00000147804, ENSG00000183072, ENSG00000125648, ENSG00000120899, ENSG00000100300, ENSG00000069482, ENSG00000185989, ENSG00000124134	282	975	16650	0.968903	1	1	0.991488
GOTERM_BP_FAT	GO:0034762~regulation of transmembrane transport	7	2.04678	0.685129	ENSG00000169992, ENSG00000171791, ENSG00000120899, ENSG00000158445, ENSG00000069482, ENSG00000124134, ENSG00000170049	282	406	16650	1.01798	1	1	0.991488
GOTERM_BP_FAT	GO:0015672~monovalent inorganic cation transport	8	2.33918	0.716638	ENSG00000069431, ENSG00000183072, ENSG00000120899, ENSG00000135740, ENSG00000158445, ENSG00000069482, ENSG00000124134, ENSG00000170049	282	486	16650	0.971894	1	1	0.991488
GOTERM_BP_FAT	GO:0055085~transmembrane transport	21	6.14035	0.728044	ENSG00000069431, ENSG00000104321, ENSG00000171791, ENSG00000135740, ENSG00000170175, ENSG00000158445, ENSG00000136997, ENSG00000171488, ENSG00000073150, ENSG00000205560, ENSG00000170049, ENSG00000147804, ENSG00000165474, ENSG00000125648, ENSG00000204267, ENSG00000120899, ENSG00000169992, ENSG00000069482, ENSG00000185989, ENSG00000161798, ENSG00000124134	282	1322	16650	0.937892	1	1	0.991488
GOTERM_BP_FAT	GO:0098660~inorganic ion transmembrane transport	11	3.21637	0.785764	ENSG00000069431, ENSG00000104321, ENSG00000147804, ENSG00000125648, ENSG00000120899, ENSG00000135740, ENSG00000158445, ENSG00000069482, ENSG00000185989, ENSG00000124134, ENSG00000170049	282	725	16650	0.895818	1	1	0.991488
GOTERM_BP_FAT	GO:0034765~regulation of ion transmembrane transport	6	1.75439	0.794672	ENSG00000169992, ENSG00000120899, ENSG00000158445, ENSG00000069482, ENSG00000124134, ENSG00000170049	282	392	16650	0.903713	1	1	0.991488
Annotation Cluster 110	Enrichment Score: 0.3019707835412631
Category	Term	Count	%	PValue	Genes	List Total	Pop Hits	Pop Total	Fold Enrichment	Bonferroni	Benjamini	FDR
GOTERM_BP_FAT	GO:0006813~potassium ion transport	7	2.04678	0.149978	ENSG00000069431, ENSG00000120899, ENSG00000135740, ENSG00000158445, ENSG00000069482, ENSG00000124134, ENSG00000170049	282	212	16650	1.94952	1	1	0.991488
GOTERM_BP_FAT	GO:0032409~regulation of transporter activity	6	1.75439	0.262314	ENSG00000127561, ENSG00000169992, ENSG00000171791, ENSG00000120899, ENSG00000069482, ENSG00000124134	282	204	16650	1.73655	1	1	0.991488
GOTERM_BP_FAT	GO:0043266~regulation of potassium ion transport	3	0.877193	0.362007	ENSG00000120899, ENSG00000069482, ENSG00000124134	282	75	16650	2.3617	1	1	0.991488
GOTERM_BP_FAT	GO:0022898~regulation of transmembrane transporter activity	5	1.46199	0.394266	ENSG00000169992, ENSG00000171791, ENSG00000120899, ENSG00000069482, ENSG00000124134	282	190	16650	1.55375	1	1	0.991488
GOTERM_BP_FAT	GO:0043269~regulation of ion transport	11	3.21637	0.460676	ENSG00000183072, ENSG00000132326, ENSG00000169992, ENSG00000171791, ENSG00000120899, ENSG00000100300, ENSG00000158445, ENSG00000069482, ENSG00000171488, ENSG00000124134, ENSG00000170049	282	554	16650	1.17233	1	1	0.991488
GOTERM_BP_FAT	GO:0030001~metal ion transport	15	4.38596	0.508745	ENSG00000069431, ENSG00000104321, ENSG00000176273, ENSG00000171791, ENSG00000135740, ENSG00000158445, ENSG00000170049, ENSG00000147804, ENSG00000183072, ENSG00000125648, ENSG00000120899, ENSG00000100300, ENSG00000069482, ENSG00000185989, ENSG00000124134	282	814	16650	1.08801	1	1	0.991488
GOTERM_BP_FAT	GO:0032412~regulation of ion transmembrane transporter activity	4	1.16959	0.607017	ENSG00000169992, ENSG00000120899, ENSG00000069482, ENSG00000124134	282	185	16650	1.2766	1	1	0.991488
GOTERM_BP_FAT	GO:0010959~regulation of metal ion transport	6	1.75439	0.636313	ENSG00000183072, ENSG00000171791, ENSG00000120899, ENSG00000100300, ENSG00000069482, ENSG00000124134	282	322	16650	1.10017	1	1	0.991488
GOTERM_BP_FAT	GO:0006812~cation transport	16	4.67836	0.681869	ENSG00000069431, ENSG00000104321, ENSG00000176273, ENSG00000171791, ENSG00000135740, ENSG00000170175, ENSG00000158445, ENSG00000170049, ENSG00000147804, ENSG00000183072, ENSG00000125648, ENSG00000120899, ENSG00000100300, ENSG00000069482, ENSG00000185989, ENSG00000124134	282	975	16650	0.968903	1	1	0.991488
GOTERM_BP_FAT	GO:0034762~regulation of transmembrane transport	7	2.04678	0.685129	ENSG00000169992, ENSG00000171791, ENSG00000120899, ENSG00000158445, ENSG00000069482, ENSG00000124134, ENSG00000170049	282	406	16650	1.01798	1	1	0.991488
GOTERM_BP_FAT	GO:0015672~monovalent inorganic cation transport	8	2.33918	0.716638	ENSG00000069431, ENSG00000183072, ENSG00000120899, ENSG00000135740, ENSG00000158445, ENSG00000069482, ENSG00000124134, ENSG00000170049	282	486	16650	0.971894	1	1	0.991488
GOTERM_BP_FAT	GO:0034765~regulation of ion transmembrane transport	6	1.75439	0.794672	ENSG00000169992, ENSG00000120899, ENSG00000158445, ENSG00000069482, ENSG00000124134, ENSG00000170049	282	392	16650	0.903713	1	1	0.991488
GOTERM_BP_FAT	GO:1904062~regulation of cation transmembrane transport	3	0.877193	0.877595	ENSG00000120899, ENSG00000069482, ENSG00000124134	282	213	16650	0.831585	1	1	0.991488
Annotation Cluster 111	Enrichment Score: 0.2979887142462737
Category	Term	Count	%	PValue	Genes	List Total	Pop Hits	Pop Total	Fold Enrichment	Bonferroni	Benjamini	FDR
GOTERM_BP_FAT	GO:0032496~response to lipopolysaccharide	7	2.04678	0.397709	ENSG00000185187, ENSG00000103490, ENSG00000215788, ENSG00000120949, ENSG00000100300, ENSG00000064932, ENSG00000159842	282	302	16650	1.36854	1	1	0.991488
GOTERM_BP_FAT	GO:0009607~response to biotic stimulus	17	4.97076	0.411273	ENSG00000197381, ENSG00000069431, ENSG00000185507, ENSG00000103490, ENSG00000171791, ENSG00000215788, ENSG00000120949, ENSG00000136997, ENSG00000064932, ENSG00000159842, ENSG00000142089, ENSG00000185187, ENSG00000055332, ENSG00000185201, ENSG00000100300, ENSG00000160710, ENSG00000107201	282	873	16650	1.14974	1	1	0.991488
GOTERM_BP_FAT	GO:0043207~response to external biotic stimulus	16	4.67836	0.424454	ENSG00000197381, ENSG00000069431, ENSG00000185507, ENSG00000103490, ENSG00000171791, ENSG00000215788, ENSG00000120949, ENSG00000064932, ENSG00000159842, ENSG00000142089, ENSG00000185187, ENSG00000055332, ENSG00000185201, ENSG00000100300, ENSG00000160710, ENSG00000107201	282	829	16650	1.13954	1	1	0.991488
GOTERM_BP_FAT	GO:0051707~response to other organism	16	4.67836	0.424454	ENSG00000197381, ENSG00000069431, ENSG00000185507, ENSG00000103490, ENSG00000171791, ENSG00000215788, ENSG00000120949, ENSG00000064932, ENSG00000159842, ENSG00000142089, ENSG00000185187, ENSG00000055332, ENSG00000185201, ENSG00000100300, ENSG00000160710, ENSG00000107201	282	829	16650	1.13954	1	1	0.991488
GOTERM_BP_FAT	GO:0002237~response to molecule of bacterial origin	7	2.04678	0.442761	ENSG00000185187, ENSG00000103490, ENSG00000215788, ENSG00000120949, ENSG00000100300, ENSG00000064932, ENSG00000159842	282	316	16650	1.3079	1	1	0.991488
GOTERM_BP_FAT	GO:0033993~response to lipid	14	4.09357	0.698212	ENSG00000103490, ENSG00000171791, ENSG00000215788, ENSG00000120949, ENSG00000114115, ENSG00000139874, ENSG00000136997, ENSG00000064932, ENSG00000159842, ENSG00000165474, ENSG00000185187, ENSG00000120899, ENSG00000113083, ENSG00000100300	282	860	16650	0.961158	1	1	0.991488
GOTERM_BP_FAT	GO:0009617~response to bacterium	7	2.04678	0.90067	ENSG00000185187, ENSG00000103490, ENSG00000215788, ENSG00000120949, ENSG00000100300, ENSG00000064932, ENSG00000159842	282	544	16650	0.759739	1	1	0.991488
Annotation Cluster 112	Enrichment Score: 0.2904223762086666
Category	Term	Count	%	PValue	Genes	List Total	Pop Hits	Pop Total	Fold Enrichment	Bonferroni	Benjamini	FDR
GOTERM_BP_FAT	GO:0072332~intrinsic apoptotic signaling pathway by p53 class mediator	3	0.877193	0.362007	ENSG00000103490, ENSG00000005882, ENSG00000183765	282	75	16650	2.3617	1	1	0.991488
GOTERM_BP_FAT	GO:0072331~signal transduction by p53 class mediator	4	1.16959	0.53367	ENSG00000103490, ENSG00000005882, ENSG00000116017, ENSG00000183765	282	166	16650	1.42271	1	1	0.991488
GOTERM_BP_FAT	GO:0097193~intrinsic apoptotic signaling pathway	5	1.46199	0.696214	ENSG00000103490, ENSG00000171791, ENSG00000076242, ENSG00000005882, ENSG00000183765	282	279	16650	1.05811	1	1	0.991488
Annotation Cluster 113	Enrichment Score: 0.2893798177613217
Category	Term	Count	%	PValue	Genes	List Total	Pop Hits	Pop Total	Fold Enrichment	Bonferroni	Benjamini	FDR
GOTERM_BP_FAT	GO:0032446~protein modification by small protein conjugation	17	4.97076	0.428525	ENSG00000214357, ENSG00000176871, ENSG00000134758, ENSG00000132326, ENSG00000213024, ENSG00000171791, ENSG00000133265, ENSG00000174516, ENSG00000012963, ENSG00000144712, ENSG00000145416, ENSG00000116670, ENSG00000134690, ENSG00000030066, ENSG00000120899, ENSG00000100300, ENSG00000184900	282	887	16650	1.13159	1	1	0.991488
GOTERM_BP_FAT	GO:0070647~protein modification by small protein conjugation or removal	19	5.55556	0.484224	ENSG00000214357, ENSG00000176871, ENSG00000134758, ENSG00000132326, ENSG00000213024, ENSG00000171791, ENSG00000162607, ENSG00000196367, ENSG00000133265, ENSG00000174516, ENSG00000012963, ENSG00000144712, ENSG00000145416, ENSG00000116670, ENSG00000134690, ENSG00000030066, ENSG00000120899, ENSG00000100300, ENSG00000184900	282	1032	16650	1.08702	1	1	0.991488
GOTERM_BP_FAT	GO:0016567~protein ubiquitination	13	3.80117	0.652886	ENSG00000214357, ENSG00000176871, ENSG00000134758, ENSG00000132326, ENSG00000171791, ENSG00000133265, ENSG00000174516, ENSG00000012963, ENSG00000144712, ENSG00000145416, ENSG00000116670, ENSG00000120899, ENSG00000100300	282	770	16650	0.996822	1	1	0.991488
Annotation Cluster 114	Enrichment Score: 0.284624788920754
Category	Term	Count	%	PValue	Genes	List Total	Pop Hits	Pop Total	Fold Enrichment	Bonferroni	Benjamini	FDR
GOTERM_BP_FAT	GO:0007178~transmembrane receptor protein serine/threonine kinase signaling pathway	8	2.33918	0.301777	ENSG00000158747, ENSG00000183072, ENSG00000163430, ENSG00000166147, ENSG00000204435, ENSG00000123999, ENSG00000149599, ENSG00000142611	282	322	16650	1.4669	1	1	0.991488
GOTERM_BP_FAT	GO:0090092~regulation of transmembrane receptor protein serine/threonine kinase signaling pathway	5	1.46199	0.482113	ENSG00000158747, ENSG00000166147, ENSG00000204435, ENSG00000123999, ENSG00000142611	282	212	16650	1.39251	1	1	0.991488
GOTERM_BP_FAT	GO:0090101~negative regulation of transmembrane receptor protein serine/threonine kinase signaling pathway	3	0.877193	0.536619	ENSG00000158747, ENSG00000166147, ENSG00000142611	282	106	16650	1.67102	1	1	0.991488
GOTERM_BP_FAT	GO:0090288~negative regulation of cellular response to growth factor stimulus	3	0.877193	0.634947	ENSG00000158747, ENSG00000166147, ENSG00000142611	282	127	16650	1.39471	1	1	0.991488
GOTERM_BP_FAT	GO:0090287~regulation of cellular response to growth factor stimulus	4	1.16959	0.761444	ENSG00000158747, ENSG00000112715, ENSG00000166147, ENSG00000142611	282	235	16650	1.00498	1	1	0.991488
Annotation Cluster 115	Enrichment Score: 0.2684062938855159
Category	Term	Count	%	PValue	Genes	List Total	Pop Hits	Pop Total	Fold Enrichment	Bonferroni	Benjamini	FDR
GOTERM_BP_FAT	GO:0032496~response to lipopolysaccharide	7	2.04678	0.397709	ENSG00000185187, ENSG00000103490, ENSG00000215788, ENSG00000120949, ENSG00000100300, ENSG00000064932, ENSG00000159842	282	302	16650	1.36854	1	1	0.991488
GOTERM_BP_FAT	GO:0002237~response to molecule of bacterial origin	7	2.04678	0.442761	ENSG00000185187, ENSG00000103490, ENSG00000215788, ENSG00000120949, ENSG00000100300, ENSG00000064932, ENSG00000159842	282	316	16650	1.3079	1	1	0.991488
GOTERM_BP_FAT	GO:0032640~tumor necrosis factor production	3	0.877193	0.510684	ENSG00000103490, ENSG00000120949, ENSG00000100300	282	101	16650	1.75374	1	1	0.991488
GOTERM_BP_FAT	GO:0032680~regulation of tumor necrosis factor production	3	0.877193	0.531508	ENSG00000103490, ENSG00000120949, ENSG00000100300	282	105	16650	1.68693	1	1	0.991488
GOTERM_BP_FAT	GO:1903555~regulation of tumor necrosis factor superfamily cytokine production	3	0.877193	0.546726	ENSG00000103490, ENSG00000120949, ENSG00000100300	282	108	16650	1.64007	1	1	0.991488
GOTERM_BP_FAT	GO:0071706~tumor necrosis factor superfamily cytokine production	3	0.877193	0.561596	ENSG00000103490, ENSG00000120949, ENSG00000100300	282	111	16650	1.59574	1	1	0.991488
GOTERM_BP_FAT	GO:0009617~response to bacterium	7	2.04678	0.90067	ENSG00000185187, ENSG00000103490, ENSG00000215788, ENSG00000120949, ENSG00000100300, ENSG00000064932, ENSG00000159842	282	544	16650	0.759739	1	1	0.991488
Annotation Cluster 116	Enrichment Score: 0.26403717078756134
Category	Term	Count	%	PValue	Genes	List Total	Pop Hits	Pop Total	Fold Enrichment	Bonferroni	Benjamini	FDR
GOTERM_BP_FAT	GO:0044723~single-organism carbohydrate metabolic process	13	3.80117	0.431681	ENSG00000132326, ENSG00000174684, ENSG00000081479, ENSG00000005882, ENSG00000136997, ENSG00000100626, ENSG00000120697, ENSG00000166147, ENSG00000148803, ENSG00000169255, ENSG00000120899, ENSG00000073849, ENSG00000182870	282	656	16650	1.17005	1	1	0.991488
GOTERM_BP_FAT	GO:0019318~hexose metabolic process	5	1.46199	0.549491	ENSG00000132326, ENSG00000166147, ENSG00000148803, ENSG00000005882, ENSG00000136997	282	231	16650	1.27798	1	1	0.991488
GOTERM_BP_FAT	GO:0005996~monosaccharide metabolic process	5	1.46199	0.589339	ENSG00000132326, ENSG00000166147, ENSG00000148803, ENSG00000005882, ENSG00000136997	282	243	16650	1.21487	1	1	0.991488
GOTERM_BP_FAT	GO:0006006~glucose metabolic process	4	1.16959	0.628582	ENSG00000132326, ENSG00000166147, ENSG00000005882, ENSG00000136997	282	191	16650	1.23649	1	1	0.991488
Annotation Cluster 117	Enrichment Score: 0.2635645378887738
Category	Term	Count	%	PValue	Genes	List Total	Pop Hits	Pop Total	Fold Enrichment	Bonferroni	Benjamini	FDR
GOTERM_BP_FAT	GO:0031348~negative regulation of defense response	4	1.16959	0.483294	ENSG00000103241, ENSG00000055332, ENSG00000160710, ENSG00000159842	282	154	16650	1.53357	1	1	0.991488
GOTERM_BP_FAT	GO:0002698~negative regulation of immune effector process	3	0.877193	0.505385	ENSG00000103241, ENSG00000055332, ENSG00000159842	282	100	16650	1.77128	1	1	0.991488
GOTERM_BP_FAT	GO:0032102~negative regulation of response to external stimulus	5	1.46199	0.662938	ENSG00000103241, ENSG00000158747, ENSG00000185187, ENSG00000055332, ENSG00000159842	282	267	16650	1.10567	1	1	0.991488
Annotation Cluster 118	Enrichment Score: 0.2621365672895844
Category	Term	Count	%	PValue	Genes	List Total	Pop Hits	Pop Total	Fold Enrichment	Bonferroni	Benjamini	FDR
GOTERM_BP_FAT	GO:0006606~protein import into nucleus	7	2.04678	0.335322	ENSG00000213024, ENSG00000182481, ENSG00000112559, ENSG00000169371, ENSG00000160710, ENSG00000171700, ENSG00000107201	282	280	16650	1.47606	1	1	0.991488
GOTERM_BP_FAT	GO:0044744~protein targeting to nucleus	7	2.04678	0.335322	ENSG00000213024, ENSG00000182481, ENSG00000112559, ENSG00000169371, ENSG00000160710, ENSG00000171700, ENSG00000107201	282	280	16650	1.47606	1	1	0.991488
GOTERM_BP_FAT	GO:0060341~regulation of cellular localization	17	4.97076	0.336243	ENSG00000047621, ENSG00000103241, ENSG00000112715, ENSG00000132326, ENSG00000213024, ENSG00000171791, ENSG00000112559, ENSG00000157168, ENSG00000158445, ENSG00000171700, ENSG00000170837, ENSG00000120899, ENSG00000169992, ENSG00000164362, ENSG00000162878, ENSG00000180447, ENSG00000107201	282	834	16650	1.20351	1	1	0.991488
GOTERM_BP_FAT	GO:1902593~single-organism nuclear import	7	2.04678	0.338238	ENSG00000213024, ENSG00000182481, ENSG00000112559, ENSG00000169371, ENSG00000160710, ENSG00000171700, ENSG00000107201	282	281	16650	1.47081	1	1	0.991488
GOTERM_BP_FAT	GO:1902582~single-organism intracellular transport	14	4.09357	0.390598	ENSG00000103241, ENSG00000213024, ENSG00000099864, ENSG00000112559, ENSG00000029534, ENSG00000169371, ENSG00000158445, ENSG00000171700, ENSG00000205560, ENSG00000204267, ENSG00000030066, ENSG00000182481, ENSG00000160710, ENSG00000107201	282	695	16650	1.18935	1	1	0.991488
GOTERM_BP_FAT	GO:0051170~nuclear import	7	2.04678	0.391505	ENSG00000213024, ENSG00000182481, ENSG00000112559, ENSG00000169371, ENSG00000160710, ENSG00000171700, ENSG00000107201	282	299	16650	1.38227	1	1	0.991488
GOTERM_BP_FAT	GO:0034504~protein localization to nucleus	8	2.33918	0.426407	ENSG00000213024, ENSG00000182481, ENSG00000164362, ENSG00000112559, ENSG00000169371, ENSG00000160710, ENSG00000171700, ENSG00000107201	282	363	16650	1.30121	1	1	0.991488
GOTERM_BP_FAT	GO:0017038~protein import	7	2.04678	0.481839	ENSG00000213024, ENSG00000182481, ENSG00000112559, ENSG00000169371, ENSG00000160710, ENSG00000171700, ENSG00000107201	282	329	16650	1.25622	1	1	0.991488
GOTERM_BP_FAT	GO:1900180~regulation of protein localization to nucleus	5	1.46199	0.503361	ENSG00000213024, ENSG00000164362, ENSG00000112559, ENSG00000171700, ENSG00000107201	282	218	16650	1.35419	1	1	0.991488
GOTERM_BP_FAT	GO:0006913~nucleocytoplasmic transport	9	2.63158	0.531335	ENSG00000140350, ENSG00000213024, ENSG00000182481, ENSG00000030066, ENSG00000112559, ENSG00000169371, ENSG00000160710, ENSG00000171700, ENSG00000107201	282	465	16650	1.14276	1	1	0.991488
GOTERM_BP_FAT	GO:0032386~regulation of intracellular transport	9	2.63158	0.545353	ENSG00000047621, ENSG00000103241, ENSG00000213024, ENSG00000112559, ENSG00000157168, ENSG00000158445, ENSG00000180447, ENSG00000171700, ENSG00000107201	282	472	16650	1.12581	1	1	0.991488
GOTERM_BP_FAT	GO:0051169~nuclear transport	9	2.63158	0.547769	ENSG00000140350, ENSG00000213024, ENSG00000182481, ENSG00000030066, ENSG00000112559, ENSG00000169371, ENSG00000160710, ENSG00000171700, ENSG00000107201	282	473	16650	1.12343	1	1	0.991488
GOTERM_BP_FAT	GO:0042306~regulation of protein import into nucleus	4	1.16959	0.554162	ENSG00000213024, ENSG00000112559, ENSG00000171700, ENSG00000107201	282	172	16650	1.37308	1	1	0.991488
GOTERM_BP_FAT	GO:0032880~regulation of protein localization	17	4.97076	0.561061	ENSG00000112715, ENSG00000132326, ENSG00000213024, ENSG00000103490, ENSG00000065882, ENSG00000171791, ENSG00000110723, ENSG00000112559, ENSG00000157168, ENSG00000158445, ENSG00000171700, ENSG00000166313, ENSG00000170837, ENSG00000169992, ENSG00000164362, ENSG00000162878, ENSG00000107201	282	962	16650	1.04337	1	1	0.991488
GOTERM_BP_FAT	GO:0033365~protein localization to organelle	16	4.67836	0.561485	ENSG00000112715, ENSG00000213024, ENSG00000171791, ENSG00000112559, ENSG00000044459, ENSG00000157168, ENSG00000169371, ENSG00000171700, ENSG00000182481, ENSG00000102977, ENSG00000164362, ENSG00000179051, ENSG00000100300, ENSG00000160710, ENSG00000180921, ENSG00000107201	282	902	16650	1.04732	1	1	0.991488
GOTERM_BP_FAT	GO:1904589~regulation of protein import	4	1.16959	0.569855	ENSG00000213024, ENSG00000112559, ENSG00000171700, ENSG00000107201	282	175	16650	1.34954	1	1	0.991488
GOTERM_BP_FAT	GO:0072594~establishment of protein localization to organelle	12	3.50877	0.572605	ENSG00000213024, ENSG00000182481, ENSG00000102977, ENSG00000171791, ENSG00000164362, ENSG00000112559, ENSG00000100300, ENSG00000169371, ENSG00000157168, ENSG00000160710, ENSG00000171700, ENSG00000107201	282	666	16650	1.06383	1	1	0.991488
GOTERM_BP_FAT	GO:1903533~regulation of protein targeting	6	1.75439	0.573733	ENSG00000213024, ENSG00000112559, ENSG00000157168, ENSG00000158445, ENSG00000171700, ENSG00000107201	282	300	16650	1.18085	1	1	0.991488
GOTERM_BP_FAT	GO:0051223~regulation of protein transport	13	3.80117	0.609365	ENSG00000132326, ENSG00000213024, ENSG00000103490, ENSG00000110723, ENSG00000112559, ENSG00000157168, ENSG00000158445, ENSG00000171700, ENSG00000166313, ENSG00000170837, ENSG00000169992, ENSG00000162878, ENSG00000107201	282	746	16650	1.02889	1	1	0.991488
GOTERM_BP_FAT	GO:1903827~regulation of cellular protein localization	10	2.92398	0.61101	ENSG00000112715, ENSG00000213024, ENSG00000171791, ENSG00000164362, ENSG00000112559, ENSG00000162878, ENSG00000157168, ENSG00000158445, ENSG00000171700, ENSG00000107201	282	562	16650	1.05058	1	1	0.991488
GOTERM_BP_FAT	GO:0070201~regulation of establishment of protein localization	14	4.09357	0.631788	ENSG00000132326, ENSG00000213024, ENSG00000103490, ENSG00000171791, ENSG00000110723, ENSG00000112559, ENSG00000157168, ENSG00000158445, ENSG00000171700, ENSG00000166313, ENSG00000170837, ENSG00000169992, ENSG00000162878, ENSG00000107201	282	820	16650	1.00804	1	1	0.991488
GOTERM_BP_FAT	GO:0006605~protein targeting	12	3.50877	0.640705	ENSG00000213024, ENSG00000099864, ENSG00000182481, ENSG00000112559, ENSG00000029534, ENSG00000100300, ENSG00000169371, ENSG00000157168, ENSG00000158445, ENSG00000160710, ENSG00000171700, ENSG00000107201	282	701	16650	1.01071	1	1	0.991488
GOTERM_BP_FAT	GO:0046822~regulation of nucleocytoplasmic transport	4	1.16959	0.703553	ENSG00000213024, ENSG00000112559, ENSG00000171700, ENSG00000107201	282	214	16650	1.1036	1	1	0.991488
GOTERM_BP_FAT	GO:0006886~intracellular protein transport	16	4.67836	0.745922	ENSG00000213024, ENSG00000099864, ENSG00000065882, ENSG00000110723, ENSG00000112559, ENSG00000029534, ENSG00000157168, ENSG00000169371, ENSG00000158445, ENSG00000171700, ENSG00000204267, ENSG00000182481, ENSG00000102977, ENSG00000100300, ENSG00000160710, ENSG00000107201	282	1020	16650	0.926158	1	1	0.991488
GOTERM_BP_FAT	GO:0033157~regulation of intracellular protein transport	6	1.75439	0.757987	ENSG00000213024, ENSG00000112559, ENSG00000157168, ENSG00000158445, ENSG00000171700, ENSG00000107201	282	373	16650	0.949746	1	1	0.991488
GOTERM_BP_FAT	GO:0046907~intracellular transport	24	7.01754	0.814753	ENSG00000047621, ENSG00000103241, ENSG00000213024, ENSG00000196230, ENSG00000099864, ENSG00000065882, ENSG00000110723, ENSG00000112559, ENSG00000029534, ENSG00000157168, ENSG00000169371, ENSG00000158445, ENSG00000066735, ENSG00000171700, ENSG00000205560, ENSG00000140350, ENSG00000204267, ENSG00000030066, ENSG00000182481, ENSG00000102977, ENSG00000100300, ENSG00000160710, ENSG00000180447, ENSG0000…	282	1594	16650	0.888972	1	1	0.991488
GOTERM_BP_FAT	GO:0090316~positive regulation of intracellular protein transport	3	0.877193	0.932332	ENSG00000157168, ENSG00000158445, ENSG00000107201	282	256	16650	0.691905	1	1	0.991488
GOTERM_BP_FAT	GO:0032388~positive regulation of intracellular transport	3	0.877193	0.957063	ENSG00000157168, ENSG00000158445, ENSG00000107201	282	288	16650	0.615027	1	1	0.991488
Annotation Cluster 119	Enrichment Score: 0.2597889073659986
Category	Term	Count	%	PValue	Genes	List Total	Pop Hits	Pop Total	Fold Enrichment	Bonferroni	Benjamini	FDR
GOTERM_BP_FAT	GO:0034508~centromere complex assembly	3	0.877193	0.231323	ENSG00000104147, ENSG00000151725, ENSG00000117724	282	54	16650	3.28014	1	1	0.991488
GOTERM_BP_FAT	GO:0043486~histone exchange	3	0.877193	0.262636	ENSG00000104147, ENSG00000140350, ENSG00000151725	282	59	16650	3.00216	1	1	0.991488
GOTERM_BP_FAT	GO:0006338~chromatin remodeling	5	1.46199	0.30787	ENSG00000104147, ENSG00000140350, ENSG00000151725, ENSG00000136997, ENSG00000124795	282	166	16650	1.77839	1	1	0.991488
GOTERM_BP_FAT	GO:0043044~ATP-dependent chromatin remodeling	3	0.877193	0.392162	ENSG00000104147, ENSG00000140350, ENSG00000151725	282	80	16650	2.2141	1	1	0.991488
GOTERM_BP_FAT	GO:0006333~chromatin assembly or disassembly	4	1.16959	0.628582	ENSG00000104147, ENSG00000140350, ENSG00000151725, ENSG00000162367	282	191	16650	1.23649	1	1	0.991488
GOTERM_BP_FAT	GO:0006323~DNA packaging	4	1.16959	0.675676	ENSG00000104147, ENSG00000140350, ENSG00000151725, ENSG00000113810	282	205	16650	1.15205	1	1	0.991488
GOTERM_BP_FAT	GO:0006334~nucleosome assembly	3	0.877193	0.726513	ENSG00000104147, ENSG00000140350, ENSG00000151725	282	151	16650	1.17303	1	1	0.991488
GOTERM_BP_FAT	GO:0065004~protein-DNA complex assembly	4	1.16959	0.761444	ENSG00000104147, ENSG00000140350, ENSG00000151725, ENSG00000117724	282	235	16650	1.00498	1	1	0.991488
GOTERM_BP_FAT	GO:0031497~chromatin assembly	3	0.877193	0.776173	ENSG00000104147, ENSG00000140350, ENSG00000151725	282	167	16650	1.06064	1	1	0.991488
GOTERM_BP_FAT	GO:0034728~nucleosome organization	3	0.877193	0.805586	ENSG00000104147, ENSG00000140350, ENSG00000151725	282	178	16650	0.995099	1	1	0.991488
GOTERM_BP_FAT	GO:0071824~protein-DNA complex subunit organization	4	1.16959	0.822078	ENSG00000104147, ENSG00000140350, ENSG00000151725, ENSG00000117724	282	262	16650	0.901413	1	1	0.991488
GOTERM_BP_FAT	GO:0071103~DNA conformation change	4	1.16959	0.861316	ENSG00000104147, ENSG00000140350, ENSG00000151725, ENSG00000113810	282	284	16650	0.831585	1	1	0.991488
Annotation Cluster 120	Enrichment Score: 0.2596916513408623
Category	Term	Count	%	PValue	Genes	List Total	Pop Hits	Pop Total	Fold Enrichment	Bonferroni	Benjamini	FDR
GOTERM_BP_FAT	GO:0010810~regulation of cell-substrate adhesion	5	1.46199	0.356012	ENSG00000103241, ENSG00000112715, ENSG00000171791, ENSG00000120899, ENSG00000179051	282	179	16650	1.64923	1	1	0.991488
GOTERM_BP_FAT	GO:0010811~positive regulation of cell-substrate adhesion	3	0.877193	0.536619	ENSG00000103241, ENSG00000112715, ENSG00000120899	282	106	16650	1.67102	1	1	0.991488
GOTERM_BP_FAT	GO:0090130~tissue migration	5	1.46199	0.569548	ENSG00000103241, ENSG00000112715, ENSG00000126561, ENSG00000204435, ENSG00000120899	282	237	16650	1.24562	1	1	0.991488
GOTERM_BP_FAT	GO:0031589~cell-substrate adhesion	6	1.75439	0.591352	ENSG00000103241, ENSG00000112715, ENSG00000166452, ENSG00000171791, ENSG00000120899, ENSG00000179051	282	306	16650	1.1577	1	1	0.991488
GOTERM_BP_FAT	GO:0045785~positive regulation of cell adhesion	6	1.75439	0.78169	ENSG00000103241, ENSG00000112715, ENSG00000103490, ENSG00000120899, ENSG00000157168, ENSG00000137312	282	385	16650	0.920144	1	1	0.991488
Annotation Cluster 121	Enrichment Score: 0.25285816964380126
Category	Term	Count	%	PValue	Genes	List Total	Pop Hits	Pop Total	Fold Enrichment	Bonferroni	Benjamini	FDR
GOTERM_BP_FAT	GO:0030183~B cell differentiation	4	1.16959	0.29326	ENSG00000171791, ENSG00000123999, ENSG00000120899, ENSG00000067082	282	112	16650	2.10866	1	1	0.991488
GOTERM_BP_FAT	GO:0042113~B cell activation	6	1.75439	0.401701	ENSG00000174371, ENSG00000171791, ENSG00000123999, ENSG00000120899, ENSG00000076242, ENSG00000067082	282	246	16650	1.44006	1	1	0.991488
GOTERM_BP_FAT	GO:0030098~lymphocyte differentiation	4	1.16959	0.897754	ENSG00000171791, ENSG00000123999, ENSG00000120899, ENSG00000067082	282	310	16650	0.761839	1	1	0.991488
GOTERM_BP_FAT	GO:0046649~lymphocyte activation	8	2.33918	0.92099	ENSG00000174371, ENSG00000103490, ENSG00000171791, ENSG00000123999, ENSG00000120899, ENSG00000076242, ENSG00000069482, ENSG00000067082	282	643	16650	0.734589	1	1	0.991488
Annotation Cluster 122	Enrichment Score: 0.25077768958651053
Category	Term	Count	%	PValue	Genes	List Total	Pop Hits	Pop Total	Fold Enrichment	Bonferroni	Benjamini	FDR
GOTERM_BP_FAT	GO:0032496~response to lipopolysaccharide	7	2.04678	0.397709	ENSG00000185187, ENSG00000103490, ENSG00000215788, ENSG00000120949, ENSG00000100300, ENSG00000064932, ENSG00000159842	282	302	16650	1.36854	1	1	0.991488
GOTERM_BP_FAT	GO:0002237~response to molecule of bacterial origin	7	2.04678	0.442761	ENSG00000185187, ENSG00000103490, ENSG00000215788, ENSG00000120949, ENSG00000100300, ENSG00000064932, ENSG00000159842	282	316	16650	1.3079	1	1	0.991488
GOTERM_BP_FAT	GO:0071222~cellular response to lipopolysaccharide	4	1.16959	0.461637	ENSG00000185187, ENSG00000103490, ENSG00000100300, ENSG00000064932	282	149	16650	1.58503	1	1	0.991488
GOTERM_BP_FAT	GO:0071219~cellular response to molecule of bacterial origin	4	1.16959	0.487577	ENSG00000185187, ENSG00000103490, ENSG00000100300, ENSG00000064932	282	155	16650	1.52368	1	1	0.991488
GOTERM_BP_FAT	GO:0071216~cellular response to biotic stimulus	4	1.16959	0.569855	ENSG00000185187, ENSG00000103490, ENSG00000100300, ENSG00000064932	282	175	16650	1.34954	1	1	0.991488
GOTERM_BP_FAT	GO:0071396~cellular response to lipid	7	2.04678	0.863273	ENSG00000185187, ENSG00000103490, ENSG00000120899, ENSG00000100300, ENSG00000139874, ENSG00000136997, ENSG00000064932	282	509	16650	0.81198	1	1	0.991488
GOTERM_BP_FAT	GO:0009617~response to bacterium	7	2.04678	0.90067	ENSG00000185187, ENSG00000103490, ENSG00000215788, ENSG00000120949, ENSG00000100300, ENSG00000064932, ENSG00000159842	282	544	16650	0.759739	1	1	0.991488
Annotation Cluster 123	Enrichment Score: 0.24109027020128151
Category	Term	Count	%	PValue	Genes	List Total	Pop Hits	Pop Total	Fold Enrichment	Bonferroni	Benjamini	FDR
GOTERM_BP_FAT	GO:0019216~regulation of lipid metabolic process	7	2.04678	0.357359	ENSG00000120899, ENSG00000106538, ENSG00000151468, ENSG00000144891, ENSG00000100300, ENSG00000069482, ENSG00000005882	282	287	16650	1.44006	1	1	0.991488
GOTERM_BP_FAT	GO:0071375~cellular response to peptide hormone stimulus	7	2.04678	0.380097	ENSG00000214575, ENSG00000126561, ENSG00000166147, ENSG00000106538, ENSG00000144891, ENSG00000005882, ENSG00000136997	282	295	16650	1.40101	1	1	0.991488
GOTERM_BP_FAT	GO:1901653~cellular response to peptide	7	2.04678	0.437016	ENSG00000214575, ENSG00000126561, ENSG00000166147, ENSG00000106538, ENSG00000144891, ENSG00000005882, ENSG00000136997	282	315	16650	1.31206	1	1	0.991488
GOTERM_BP_FAT	GO:0009725~response to hormone	16	4.67836	0.479161	ENSG00000214575, ENSG00000213024, ENSG00000126561, ENSG00000171791, ENSG00000106538, ENSG00000005882, ENSG00000139874, ENSG00000136997, ENSG00000165474, ENSG00000166147, ENSG00000120899, ENSG00000113083, ENSG00000204435, ENSG00000144891, ENSG00000100300, ENSG00000069482	282	854	16650	1.10618	1	1	0.991488
GOTERM_BP_FAT	GO:0043434~response to peptide hormone	8	2.33918	0.539604	ENSG00000214575, ENSG00000126561, ENSG00000166147, ENSG00000106538, ENSG00000144891, ENSG00000069482, ENSG00000005882, ENSG00000136997	282	405	16650	1.16627	1	1	0.991488
GOTERM_BP_FAT	GO:1901698~response to nitrogen compound	16	4.67836	0.549098	ENSG00000214575, ENSG00000126561, ENSG00000171791, ENSG00000106538, ENSG00000170175, ENSG00000005882, ENSG00000136997, ENSG00000137312, ENSG00000166147, ENSG00000120899, ENSG00000164362, ENSG00000144891, ENSG00000100300, ENSG00000069482, ENSG00000160710, ENSG00000107201	282	895	16650	1.05551	1	1	0.991488
GOTERM_BP_FAT	GO:1901701~cellular response to oxygen-containing compound	16	4.67836	0.57897	ENSG00000214575, ENSG00000126561, ENSG00000103490, ENSG00000106538, ENSG00000158445, ENSG00000005882, ENSG00000139874, ENSG00000136997, ENSG00000064932, ENSG00000166147, ENSG00000170837, ENSG00000185187, ENSG00000120899, ENSG00000144891, ENSG00000100300, ENSG00000183765	282	912	16650	1.03583	1	1	0.991488
GOTERM_BP_FAT	GO:0032868~response to insulin	5	1.46199	0.592586	ENSG00000214575, ENSG00000106538, ENSG00000069482, ENSG00000005882, ENSG00000136997	282	244	16650	1.20989	1	1	0.991488
GOTERM_BP_FAT	GO:1901699~cellular response to nitrogen compound	10	2.92398	0.602442	ENSG00000214575, ENSG00000126561, ENSG00000166147, ENSG00000164362, ENSG00000106538, ENSG00000144891, ENSG00000005882, ENSG00000136997, ENSG00000160710, ENSG00000137312	282	558	16650	1.05811	1	1	0.991488
GOTERM_BP_FAT	GO:0032869~cellular response to insulin stimulus	4	1.16959	0.617902	ENSG00000214575, ENSG00000106538, ENSG00000005882, ENSG00000136997	282	188	16650	1.25622	1	1	0.991488
[truncated: 260 more rows]

## Sheet: Sen_SCC25_318 genes_BP
Table S5, Related to Figure 6: GO analysis of promoter CpGI hypermethylated genes in senescent SCC15 (358 genes) , SCC25 (318 genes) cells, 43 common genes in both senescent cells, Sen_SCC15_TCGA (156 genes) and Sen_SCC25_TCGA (150 genes). Biological Processes (BP) for each gene set are shown.
[truncated: 1,835 more rows]

[truncated: 1 more sheets: Com_Sen_43 genes_BP]
